# Supplementary material for: Peripheral transcriptional responses to experimental SARS-CoV-2 inoculation in North American Elk cows and calves
Source: Research Square preprint supplement (doi:10.21203/rs.3.rs-6505643/v1), 2025-05-15
Supplement: Supplementary file 1 [file 130003b3bd4057c5fe4d148e.xlsx]

## Sheet: downregulated
Supplementary Table S1 - Downregulated genes in Calves (D0xD2)
gene_id	log2fc	padj
TRNAG-CCC_220	-1.72855	0.0235623
KSR2	-1.45086	0.0173875
LOC122423949	-1.20602	0.0326423
LOC122421755	-1.11884	0.00393136
LOC122443102	-0.954791	0.0100706
LIPM	-0.934678	4.82566907303303e-05
PDE6A	-0.933894	0.00254749
LOC122434053	-0.906608	3.18097061473341e-06
INTU	-0.889815	0.00386523
SERPINA1	-0.873408	0.000962651
IL22RA2	-0.867121	0.00246498
LOC122440436	-0.843411	0.0457304
GXYLT2	-0.824193	0.00690068
TSPAN2	-0.823517	0.0455922
LOC122422727	-0.789462	0.00140257
ANKRD22	-0.784532	5.93201194418731e-06
PEBP4	-0.783752	0.000574602
SH3PXD2B	-0.775101	0.0060399
LOC122444325	-0.72112	0.0115494
DENND11	-0.718065	0.000167394
MMP9	-0.713986	7.91556668490531e-05
LOC122432837	-0.675649	0.0359908
SLC5A3	-0.672374	0.00205285
SAMD4A	-0.656863	0.0034017
ATP9A	-0.652328	0.00868955
LOC122419783	-0.648292	0.0465946
GNAT2	-0.637032	0.0396627
ME1	-0.625783	0.0142417
GPR18	-0.621236	2.11022366352137e-08
PAPSS2	-0.620614	0.000113034
SLC27A2	-0.61895	0.0047566
SLC26A2	-0.607339	0.00012253
GPR27	-0.605499	0.00544918
ATP1B1	-0.597929	0.014007
LOC122423211	-0.597833	0.00460422
HGF	-0.585648	0.0184325
SERPINB7	-0.579651	0.00435757
PLAU	-0.565034	0.00130231
RASL11A	-0.554029	0.0302442
LOC122419689	-0.549657	1.87302154295952e-05
AATK	-0.543035	0.0203789
TMEM116	-0.514585	0.0435145
KCTD12	-0.505754	0.000795123
SIPA1L2	-0.504534	0.0341701
APH1B	-0.499524	5.89872356242625e-05
ZBTB47	-0.474388	0.000195714
LOC122428289	-0.453746	0.040679
LOC122452562	-0.452774	0.000151364
LOC122420632	-0.449167	0.000860178
GLIPR1	-0.448696	0.00864966
MGST2	-0.444193	0.000607685
TMX3	-0.442313	7.22603814310448e-05
PDP1	-0.44209	0.0265117
EMB	-0.441878	0.0327
LOC122434005	-0.438621	0.000147656
TLCD3A	-0.436481	0.0100706
TP53INP1	-0.428476	0.000496931
CPD	-0.424084	0.0306581
PLXNC1	-0.422611	0.00575936
LOC122454300	-0.421924	0.00544918
LOC122427243	-0.419926	0.0134382
DNAJC25	-0.419192	1.10650942003786e-05
DSEL	-0.415479	0.000139063
CHML	-0.411206	0.000371149
KLF7	-0.406909	0.0023752
RNF149	-0.406602	0.0331241
SLC16A6	-0.399841	0.0374057
GABPA	-0.392443	0.00264697
FAM126A	-0.389335	0.0168367
TCTN1	-0.389328	0.0124155
PI16	-0.382943	0.0247686
TBXAS1	-0.38256	0.00123529
OGT	-0.379261	0.0042649
FCRL1	-0.377503	0.00965463
SNX18	-0.376884	0.0186848
LOC122420238	-0.37515	1.21771515855224e-06
CEMIP2	-0.37448	0.00142114
FOXN2	-0.363969	0.00350258
RAB31	-0.361627	0.0496178
IL1R1	-0.361556	2.24109655250184e-06
TPM1	-0.355252	0.0451472
OGFRL1	-0.354008	0.0293209
C1GALT1	-0.352418	0.00294754
PTPRJ	-0.351215	0.016563
ATXN1	-0.346081	0.0464189
CTBP2	-0.341572	0.00188991
KLHL9	-0.340963	0.0139236
LITAF	-0.339787	0.0272973
ZBTB18	-0.338157	0.0163136
FBXO30	-0.337706	0.0105985
PDXK	-0.337642	0.0464189
BBC3	-0.334542	0.0362172
GEMIN6	-0.333876	0.0400532
NUFIP2	-0.332174	0.0099199
HIPK3	-0.330567	0.0329366
FKBP5	-0.329818	0.0118984
PDZD8	-0.328828	0.000921895
XYLT1	-0.32862	0.0467228
STK26	-0.328536	0.0335467
PKNOX1	-0.32806	0.0211249
MCU	-0.326065	0.0258582
CD44	-0.32577	0.00853238
RASSF2	-0.32493	0.00230604
ZNF132	-0.324505	0.00158156
YOD1	-0.324042	0.0162773
LOC122420219	-0.3218	0.0341701
AGPAT5	-0.320248	0.0109326
GNG7	-0.319734	0.0184797
PADI4	-0.317	0.00529173
LOC122425387	-0.315497	0.0239542
LBR	-0.315134	0.00595494
LOC122433002	-0.312435	0.0101759
CHST11	-0.312171	0.0129479
ZDHHC23	-0.30919	0.000934421
LACC1	-0.309149	0.0350625
ATP6V0A2	-0.309134	0.0243765
PKN2	-0.302441	0.0132157
CD46	-0.300574	0.0132157
INAFM2	-0.3001	0.010282
GALNT1	-0.298549	0.0144138
NLRP12	-0.297678	0.0325726
EDEM3	-0.295611	0.0359908
RMND5A	-0.293922	0.000195714
CD63	-0.292992	0.032578
SMPDL3A	-0.292124	0.00795729
ZBTB34	-0.290337	0.00185523
SEC22C	-0.286788	0.000421515
TMEM30A	-0.286148	0.00132618
BHLHE40	-0.283713	0.0438375
ZNF557	-0.283237	0.033412
TIMP2	-0.279988	0.00813963
STAG2	-0.278464	0.0341701
HVCN1	-0.277536	0.0359908
PREPL	-0.275699	0.0248705
HOOK3	-0.271838	0.0492156
IFNAR1	-0.269372	0.0275508
SUSD1	-0.269337	0.0144138
NHSL2	-0.269324	0.0287056
ADSS2	-0.268616	0.00035694
RANBP6	-0.268551	0.0260704
ENPP5	-0.266838	0.0209983
ADAM10	-0.262948	0.0273918
RECQL	-0.259803	0.0245776
ZNF655	-0.258058	0.00157492
KIAA0930	-0.25651	0.0282345
CPNE3	-0.255832	0.000390334
LOC122420718	-0.253418	0.00277445
DERL1	-0.249236	8.42319483435623e-05
ABHD3	-0.249121	0.0200944
TMEM165	-0.247629	0.00544918
KLF13	-0.241187	0.00788212
CAT	-0.234645	0.0011951
YIPF4	-0.231494	0.0346084
PPP1R15B	-0.229332	9.33705890007581e-06
ZNF248	-0.22829	0.0133653
FRAT2	-0.22499	0.0205924
MFF	-0.224214	0.0032101
CSDE1	-0.223396	0.00112094
N4BP2L2	-0.223039	0.0235623
PAPSS1	-0.222374	0.0126688
CACUL1	-0.221215	0.0465946
RPS6KA5	-0.218354	0.0148839
NEK7	-0.218209	0.00690522
TBCC	-0.216927	0.029782
AGO4	-0.216561	0.0284467
NUDT9	-0.216476	0.015748
FUCA1	-0.212462	0.0467228
C4H5orf15	-0.210536	0.0482881
ATP1B3	-0.21038	0.0244635
STRN	-0.209645	0.0220803
TMED8	-0.205846	0.0144138
PHF10	-0.201031	0.0202385
TMEM59	-0.200059	0.0272892
WDR26	-0.199268	0.0149544
C28H6orf62	-0.19377	0.0229526
C16H5orf51	-0.18916	0.0327
LOC122445935	-0.186417	0.0137397
ZADH2	-0.184942	0.0259395
UBE4A	-0.182838	0.0275508
FAM210B	-0.176025	0.0239542
ACTR2	-0.158056	0.0077535
KLHDC2	-0.15618	0.0400532
FAF2	-0.142644	0.0293209

## Sheet: upregulated
Supplementary Table S1 - Upregulated genes in Calves (D0xD2)
gene_id	log2fc	padj
EWSR1	0.135615	0.00438711
CC2D1A	0.152428	0.0432513
TINF2	0.16091	0.0155449
APLP2	0.161461	0.0474217
LOC122433328	0.166491	0.0233202
PI4KB	0.171625	0.0168151
CCDC9	0.173197	0.0289617
NDEL1	0.176348	0.0139637
SHC1	0.179048	0.00356052
LOC122441616	0.180493	0.000422265
IPO4	0.184068	0.0306581
GTPBP1	0.187521	0.0220803
DPAGT1	0.19069	0.0423157
FUS	0.194993	0.0185336
B4GALNT2	0.199262	0.00796666
TFE3	0.200184	0.0159417
UNC45A	0.200945	0.033412
ASCC2	0.201096	0.040679
BBS4	0.201175	0.0415598
TBC1D10B	0.201493	0.0442377
SUPT5H	0.205946	0.00152296
IRF2	0.207187	0.000499624
DHX8	0.210964	0.0335467
SRRT	0.212088	0.0414268
ENTPD7	0.213065	0.00369895
OTUD5	0.214437	0.00129986
GALNT6	0.214631	0.0463907
TWNK	0.216324	0.00144076
UBE2F	0.21666	0.00216826
ZFYVE26	0.217186	0.0325185
DNAJB2	0.217738	0.0374057
N4BP1	0.22456	0.00442176
PSD4	0.226562	0.0147034
SLCO3A1	0.226979	0.00948407
STAT3	0.227618	0.0189122
LOC122450846	0.228209	0.0297015
NLK	0.233107	0.0293209
FES	0.235048	0.0319057
UBAP1	0.235453	0.0168075
ZNF398	0.235595	0.0231353
SF3A1	0.236828	0.00815971
RALBP1	0.238362	0.00851197
TLE4	0.238869	0.0358838
G6PC3	0.238913	0.0293209
MCL1	0.239566	0.0432513
CHMP4A	0.241771	0.0350625
SRGAP2	0.243294	0.0343
LOC122429686	0.24364	0.0442835
PGS1	0.249037	0.0474217
GTF2B	0.249583	0.0283709
PXK	0.252108	0.00474598
SLC25A38	0.253099	0.0111092
FGD3	0.255013	0.0366146
PRKD2	0.255734	0.0198918
HK3	0.255798	0.011049
DHX38	0.258671	7.02518335600046e-05
DOCK8	0.258719	0.0241888
LRRK1	0.25906	0.0489567
EVL	0.259849	0.000722218
HERC1	0.261391	0.0155449
ITSN1	0.265244	0.0185721
TTF2	0.266168	0.01653
SIDT2	0.267972	0.00960159
IRF8	0.270439	0.0231066
CYSTM1	0.271785	0.0184797
TMEM268	0.273262	0.0368652
CAPNS1	0.273893	0.00996641
CHAF1B	0.276581	0.041837
PRAG1	0.277433	0.00720963
TLR4	0.27813	0.0497299
GRIPAP1	0.280495	0.00249456
CHSY1	0.280617	0.00112529
MARCKS	0.28266	0.0467228
LOC122431703	0.287099	0.00685221
EFCAB14	0.287159	0.0024195
DLGAP4	0.287258	0.0185721
SYTL3	0.289283	0.0419907
TCOF1	0.293286	0.0179634
ATXN7	0.294042	0.00307791
LOC122435269	0.296791	0.0389157
TIMELESS	0.300534	2.30345465130912e-05
TRAFD1	0.302027	1.01684787647629e-06
TCF4	0.303444	0.0236906
LOC122426699	0.304485	0.0482881
ABCD1	0.311203	0.00435978
DPP3	0.313172	0.0291561
RASGEF1B	0.314046	0.00685221
LOC122432525	0.314258	0.045882
RNASEL	0.314795	0.0238772
DCAF11	0.322088	0.00113024
HCLS1	0.323888	6.29875906777952e-06
STRIP1	0.325534	0.00757382
NEDD9	0.326039	0.00262758
TENT4A	0.327899	0.020172
RAB8A	0.328639	0.00884534
NLRC5	0.328715	8.49459198495752e-07
ERAP2	0.329688	0.0041453
CCDC167	0.330778	0.0129479
TOPORS	0.331123	0.00961451
LOC122426419	0.336527	0.0145858
MXRA7	0.338357	0.0497013
FBXW4	0.338954	0.0281889
CASP7	0.339821	0.0455922
ATXN3	0.341861	0.00362533
PTK2B	0.343234	3.7849296626072e-06
PTMS	0.349117	0.0225413
ARAP1	0.349908	0.00511549
XPO6	0.352339	0.0231066
LOC122440005	0.353318	0.00173403
LOC122440883	0.357565	0.0149544
C27H21orf91	0.358403	0.013091
FCHSD2	0.358705	0.0149544
TLR7	0.359691	0.0374259
SPATS2	0.360682	0.000163421
LYN	0.361273	2.34739722059991e-06
MPP1	0.36288	0.0223632
RNF139	0.363491	0.0125707
MTURN	0.365901	0.0421607
IRF3	0.368677	9.74269193503273e-05
ZBTB37	0.368953	6.99606148925292e-07
LOC122429624	0.36934	0.0124155
MUTYH	0.369553	1.65924854270512e-05
PSMB8	0.369657	0.0162807
NOTCH3	0.372141	0.00529945
TMEM229B	0.374022	0.00964944
NCF1	0.375461	0.00661101
UNC93B1	0.375705	0.0341008
RICTOR	0.377253	0.0220861
MAPRE3	0.381886	0.000289532
PLIN2	0.38351	0.00225131
DTNB	0.385026	1.66156729527611e-08
MLKL	0.385034	0.0235003
ATF4	0.385135	0.0251319
KLF11	0.386325	0.0482881
GTPBP2	0.386873	0.00102137
SLC46A2	0.388699	0.0075686
SEMA4D	0.389534	0.0045609
FBXL5	0.389722	0.00389944
STX11	0.391235	1.88619695279283e-06
TAL1	0.391571	0.00220695
TRIM14	0.391636	0.00575936
RHBDF2	0.392709	2.8019820890315e-05
GARRE1	0.395649	0.000203249
LOC122431705	0.399634	0.000599546
DBF4B	0.39992	0.00460842
NDRG1	0.401508	0.00661101
KIAA0232	0.401787	0.00036388
TNFAIP3	0.401815	0.00185523
RELB	0.402861	4.42483283694948e-05
NFKBIE	0.402914	0.00407382
ZNF710	0.403958	1.30117551073984e-06
FITM1	0.404471	0.0335467
CLYBL	0.405781	0.0193591
ESPL1	0.408038	0.0169888
LOC122426577	0.408137	0.0312151
NINJ1	0.408328	0.0277943
GRAP2	0.41682	4.13068738372966e-05
C27H3orf38	0.418355	3.63510527262056e-05
TXNL4B	0.419177	0.00250402
APOBR	0.42458	0.000245466
MOB3C	0.426551	0.000828859
GRN	0.426949	2.65180204702881e-05
TRIM38	0.427565	0.00544918
VASH1	0.427918	0.0325726
CARD6	0.439059	0.000198537
P2RY13	0.444674	0.0148249
EMC9	0.446281	0.0423549
IRF1	0.446598	1.24117160076503e-07
PLEKHG3	0.450011	0.00161841
SDS	0.456094	0.00905731
KAT2A	0.457413	2.65522517882781e-09
LOC122437123	0.459039	0.00048969
BCL2L1	0.459653	0.00114954
AP1M2	0.461585	0.00477052
SLC38A5	0.461828	0.00144334
AP1G1	0.462364	1.57102101779052e-06
ZNF282	0.463713	0.00102137
MXD4	0.465008	0.00494853
RIN2	0.465831	0.00378313
KCND1	0.467293	0.0192582
PDK4	0.475453	0.0355461
ETV6	0.475973	1.17184403547797e-15
CD300LF	0.47952	0.00369895
DMXL2	0.480967	0.0243345
SP140	0.482061	8.92205113299437e-08
ZDHHC3	0.488461	0.00149129
TAP1	0.488664	3.02498340931288e-06
CRYBA1	0.493118	0.0420244
ITPRIPL2	0.494688	0.00120001
PLA2G7	0.497304	0.0293209
IL15RA	0.501677	3.29055185718675e-05
BPGM	0.502417	0.00123529
PSME1	0.504754	0.00393136
ARHGAP26	0.504899	5.06250598278337e-09
NUCB2	0.508625	0.00585577
DDAH2	0.512849	0.000334898
TGFB1I1	0.51399	0.0162773
APOBEC3B	0.514628	0.000599546
LOC122451955	0.514779	0.00792224
CBY1	0.514818	4.29443642275444e-05
RERE	0.51517	1.70555824352078e-11
IL1RN	0.516651	0.00112094
SERTAD1	0.516654	0.000336799
MAD2L2	0.517281	0.00264697
PIK3AP1	0.519256	2.04434729100511e-06
C13H1orf21	0.519689	0.000302144
RRBP1	0.520906	3.32586439676804e-07
CELA1	0.522081	0.0203606
LOC122441757	0.525062	0.000988121
MYOF	0.530588	2.8877976770334e-05
EHD3	0.531568	0.00106895
DEAF1	0.5326	0.0110843
LOC122420132	0.533766	0.000158678
MARCHF2	0.536387	0.0169106
CLCN4	0.536403	1.44625996674042e-10
LOC122448416	0.5376	0.0042649
CHD1	0.540975	1.37969373576774e-10
TMCC2	0.546687	0.00948682
PSME2	0.548328	0.00261638
LOC122429693	0.551655	0.00148249
STRIP2	0.554962	0.0438375
LOC122437893	0.556017	0.0470334
PATL2	0.56014	2.42442333680788e-05
LMNA	0.560869	6.2532708229112e-05
CFAP410	0.56195	0.00118903
SLC6A9	0.562265	2.1609730227756e-06
EVI2B	0.563949	3.44212079212533e-06
TST	0.565626	0.0118862
P2RY6	0.566374	0.0180491
PIM3	0.566637	3.14979921129554e-05
LOC122430259	0.56775	9.99306515235252e-05
RBCK1	0.567778	1.57491604993055e-07
TAP2	0.574652	3.53110841365495e-08
LOC122452136	0.576166	0.0059042
PTPRR	0.579081	0.0288719
SLC4A4	0.580454	0.0173756
LGALSL	0.582841	0.005425
ZNF628	0.58339	1.48541253566216e-10
VAV3	0.589762	3.27246393430604e-11
SELE	0.591076	6.82450487537931e-05
LY6E	0.593578	2.57540717479516e-08
MPDZ	0.596213	0.0495346
MILR1	0.596987	1.10210721018964e-13
LOC122426651	0.601233	0.0125707
TJP2	0.602621	0.0108107
LOC122436914	0.609563	0.00502763
CLIC5	0.611009	0.0464814
SMOX	0.611072	0.00145699
LOC122436714	0.613974	0.0110734
DAPK2	0.617689	0.00972492
XRN2	0.617872	1.09507334982764e-05
OGFR	0.620777	3.20342086093398e-06
UNC5A	0.624092	0.0410076
TOR3A	0.62842	0.00401112
SLC22A4	0.628624	0.00125953
LOC122421996	0.629773	0.00945932
SLFN14	0.630174	0.000536681
F11R	0.63022	0.000720766
LOC122436913	0.632055	1.62303662641073e-05
RIPK3	0.634757	2.06748984478301e-05
TULP3	0.636732	0.0464189
LOC122447936	0.639556	0.000732324
NAMPT	0.641639	6.50365281979477e-07
VMP1	0.643007	1.11297730348061e-09
GNG11	0.64423	2.50912050242687e-05
PARVB	0.646136	0.00544918
PDE11A	0.653192	0.0401176
FOS	0.65595	0.0238177
NYNRIN	0.657281	0.00100258
EHD4	0.657552	8.56205973809396e-05
CHMP5	0.658022	1.00378132719664e-06
CYFIP1	0.659257	0.000113142
FAM76A	0.661552	1.87302154295952e-05
CD101	0.661741	3.44264462873722e-06
TMEM119	0.662944	0.0148258
SLC14A1	0.663883	0.0428383
GPR158	0.670477	0.0456467
LOC122441204	0.671124	0.013091
LOC122449459	0.674526	0.000203976
SH3BGRL2	0.67906	2.6653472328181e-05
ALOX12	0.682308	0.0142381
MORC3	0.686126	2.08680207719791e-12
TUBB1	0.690426	7.57929850482002e-05
HSPB6	0.691289	0.00980625
LOC122449451	0.695332	0.00354346
ATP2A1	0.695807	0.0435145
TRIM21	0.697058	1.28684707995643e-14
WARS1	0.698628	4.3001024345746e-05
ALDH1A1	0.702984	0.0434709
ZDHHC2	0.704394	0.0242209
CAVIN3	0.707572	0.0335467
IDO1	0.713576	0.00468674
LOC122428002	0.716427	0.0241208
BID	0.717284	9.61399498841253e-05
LOC122438090	0.718096	2.07625190739602e-08
LOC122430839	0.718651	0.00905731
LOC122430223	0.719235	0.000154744
LARGE2	0.722952	0.00218046
LOC122449068	0.726387	0.0371259
HEY2	0.72826	0.0423757
MPIG6B	0.731952	2.67398450083021e-07
EDEM1	0.732852	3.34283260410791e-07
LOC122429593	0.734981	5.96335519552205e-08
LOC122454755	0.739482	0.000179
LOC122449430	0.745246	5.91917997957705e-06
CNKSR3	0.748174	3.85994070187341e-05
LOC122436719	0.749059	0.00255383
LOC122436716	0.750721	0.0125707
IFI35	0.753017	9.27457628676501e-08
LOC122443556	0.754895	0.00720146
ANK3	0.755147	4.39908143535396e-05
VCPIP1	0.757366	1.08866528358745e-10
SLC22A23	0.758985	0.0347551
CTXN3	0.759942	2.30461173851525e-05
AZI2	0.764279	4.22823422335218e-08
KCNK13	0.768029	0.0155345
PDCD1LG2	0.768978	0.0374057
PRPSAP1	0.770806	9.45257364851645e-17
PHOSPHO1	0.771248	0.000131374
LOC122431238	0.772718	1.22184657132286e-05
CSF1	0.773118	4.73859286968469e-08
PHF21B	0.774635	0.000806062
KHNYN	0.783204	4.17071352814625e-12
TCIRG1	0.786455	1.1060188011772e-10
CALD1	0.789717	0.000977827
SHFL	0.793349	7.43965770531094e-09
LOC122454264	0.793987	1.43932918891412e-05
LOC122443025	0.797006	0.0134623
MOV10	0.801948	6.29880998175299e-13
LOC122429595	0.802936	0.0227043
TNFSF10	0.805696	0.00230604
ARHGAP28	0.805757	0.0062448
RUSC1	0.810435	4.89746076009472e-09
ATRNL1	0.810671	0.0150053
RNF31	0.811264	3.5209538833748e-20
PERM1	0.816574	0.0314904
PMAIP1	0.822149	3.45728720782875e-06
LOC122439764	0.823116	0.0389965
SDC3	0.828818	0.00928941
ZNF114	0.829699	0.00709613
RNF19B	0.830089	2.79717519634211e-09
TRIM56	0.834433	2.45579593195818e-25
LOC122429322	0.837194	0.0055803
ADCY4	0.83721	0.00515283
AQP9	0.844813	7.1449795719119e-07
PDE3A	0.847174	0.0217782
LOC122449044	0.854452	8.71157559658233e-06
LOC122429598	0.855241	7.80825763228678e-10
TDRD7	0.859463	1.67816656312403e-22
LOC122449069	0.861909	0.000379813
ATF3	0.864234	6.99606148925292e-07
SP110	0.864672	2.53255554283229e-10
NMI	0.871576	3.03052632491653e-11
LOC122435197	0.877039	1.06445163654764e-17
RBPMS2	0.877783	0.0282507
RNF114	0.878973	2.78266673879147e-12
PSMF1	0.88111	3.63510527262056e-05
RHOBTB1	0.881957	0.017372
LOC122421478	0.88325	1.43932918891412e-05
GPX3	0.893977	1.07263233116714e-06
GADD45B	0.897446	3.3322054320193e-10
LOC122430804	0.899564	6.39682066893094e-05
CRACD	0.912491	0.0431827
SYNPO2	0.919329	0.0489567
CASP3	0.92252	1.65236062482567e-07
LOC122428213	0.923394	0.0150053
VWA5A	0.926732	0.0358934
P2RY14	0.933574	2.64220046811272e-05
STAT2	0.933734	6.98107086105558e-21
BATF2	0.945686	0.000694776
FSTL4	0.94645	0.00388275
LOC122450226	0.954506	2.63193601071075e-09
HLX	0.955144	3.31439970989249e-14
LY6G6F	0.960123	0.0260704
RIPOR3	0.963394	5.44418604058668e-07
ZNF821	0.973053	1.09402402588828e-07
RIMS1	0.979614	0.024396
DCK	0.984417	1.95636972996149e-18
LAP3	0.993293	2.57779628503507e-08
KIF5C	0.994369	2.73125824404833e-05
TENT4B	0.995187	2.42039104249729e-15
ALPK1	0.999083	9.13328722412774e-11
LOC122424699	0.999566	0.0132157
TRIM25	1.00095	6.24185509913861e-26
IRF9	1.00232	2.16786273322748e-32
OPTN	1.01139	1.81718310101512e-09
LOC122449950	1.02472	5.34088521031115e-06
MYL9	1.03317	0.0331241
LOC122424041	1.05198	0.0223632
INKA1	1.06177	1.54910538902157e-09
PARP10	1.06379	4.83207304802983e-15
TNFSF13B	1.06815	3.60597085115137e-10
AQP1	1.0765	0.025485
LOC122431087	1.08051	0.00544918
LOC122445354	1.09144	0.0374259
AXL	1.09717	4.83216317645108e-12
USP25	1.09933	1.04546887976177e-28
LOC122431079	1.09982	5.45712003309143e-23
LOC122449901	1.10517	4.30608292507183e-19
IL4I1	1.11666	0.000129014
RBM43	1.11964	3.5429767256919e-09
LZTS1	1.12689	0.00103895
TIMD4	1.13924	0.000410065
LOC122426418	1.14519	2.357886112474e-15
PLEKHA4	1.18024	1.05405150905301e-06
MARCKSL1	1.18203	1.54885385566818e-15
LOC122431989	1.18803	1.09886748824529e-13
LOC122429609	1.18924	7.67155994079927e-05
TMEM140	1.19797	3.50486375681128e-15
CMTR1	1.21728	1.85744866108577e-24
DRAM1	1.22023	5.82686815999196e-11
LEPR	1.22419	0.00264697
ISG20	1.22612	5.75522540130528e-18
CIB3	1.22815	2.92345135238923e-05
CBLN3	1.23653	8.94550858844557e-22
LOC122449879	1.24358	5.20357963390842e-15
LOC122437839	1.2471	3.87468597699137e-21
PNPT1	1.24726	4.96707141883512e-10
LOC122424056	1.25552	0.00398068
C6H15orf48	1.26803	9.90540966533845e-08
STAT1	1.27176	2.47504091617465e-22
WDR35	1.29595	1.09400441056318e-07
UCHL1	1.30408	0.0139716
TASL	1.30921	2.26570675230265e-15
LOC122441818	1.31066	0.000281909
LY6G6C	1.31067	0.00313182
SPDEF	1.31149	0.0327607
HSH2D	1.32318	4.52043790777391e-29
SERINC2	1.33162	7.13148396738e-15
ADAR	1.33945	1.36218213995299e-36
LOC122436717	1.35577	6.26153324891039e-09
LOC122429635	1.35842	2.49104464912927e-20
FOXS1	1.35968	2.99271757844173e-13
LOC122448005	1.37134	1.27228824875007e-08
LOC122435416	1.37549	0.0277943
APOBEC3A	1.37562	7.55691453714392e-18
CMTR2	1.38023	5.55243959887535e-16
SYT17	1.38567	1.87302154295952e-05
TACSTD2	1.39044	0.0185721
LOC122434367	1.39331	0.000504013
LOC122447937	1.39927	0.000159573
SH3D19	1.40115	0.0263337
SNAI1	1.4084	1.301884731464e-06
TNFAIP6	1.41731	2.38358993894235e-16
TIFA	1.42185	3.93307167984069e-10
LOC122428735	1.422	0.016563
TGM1	1.43115	5.04924653863663e-16
ART1	1.43987	9.56652761876635e-07
LOC122436715	1.44672	2.01258132877357e-06
LOC122428295	1.44685	0.0139716
TEAD1	1.44767	0.00264697
LGALS9	1.45168	1.08114737682096e-12
LOC122451399	1.473	0.0155345
STOML1	1.47483	4.30566274297955e-16
LOC122445080	1.49034	8.90985824389745e-17
PARP12	1.4925	1.66321168275138e-33
IFIH1	1.51478	1.95930610993347e-22
EIF2AK2	1.62879	4.93873015097186e-44
IFIT5	1.63676	1.1575296341244e-07
LOC122420647	1.66977	0.0173756
LIF	1.67594	9.44203812567892e-09
LOC122431250	1.69428	1.4479294429815e-07
CGAS	1.69858	1.09660285239092e-11
SMTNL1	1.70717	6.35161957385709e-16
CCRL2	1.73034	1.87514000897885e-12
LOC122449458	1.739	0.00227621
LOC122442751	1.74987	0.00147696
DTX3L	1.76398	5.35409125273133e-38
UBA7	1.78439	2.33376029318323e-27
B3GNT6	1.78517	0.0327825
LOC122444635	1.78593	6.71094292834289e-06
XAF1	1.79504	2.62578249246893e-29
IFIT3	1.81842	6.22729554900371e-09
CEBPZOS	1.82039	1.25874789246711e-59
LOC122453768	1.8233	0.0283904
LOC122448780	1.83237	2.75224078366847e-58
PARP9	1.84721	2.24918095674607e-30
UBE2L6	1.92525	4.90995326549648e-31
OSMR	1.94343	0.00125724
LOC122438172	1.96019	6.75985618265246e-13
SULT6B1	2.00237	4.22596265519701e-13
LOC122452766	2.03565	3.23837441054144e-09
C2	2.06988	0.0169888
ZCCHC2	2.07452	7.46073886953716e-50
LOC122419678	2.12255	1.28164495521737e-09
SPATS2L	2.12961	3.64979486193297e-11
PML	2.1348	7.61860269623325e-45
DDX58	2.14099	1.65163778098757e-25
CMPK2	2.16571	5.44881899029374e-26
SERPING1	2.17523	9.33705890007581e-06
HERC5	2.19379	2.2577405759151e-33
ELN	2.2441	8.85791986028806e-05
CD274	2.25719	5.20497875494833e-13
ZNFX1	2.29359	6.99196090566059e-39
LOC122428361	2.29867	4.96117511024833e-11
ZFYVE28	2.30359	5.7713293026498e-07
NOS2	2.3303	0.0260808
LOC122434938	2.3502	0.00230604
IRF7	2.46206	3.02459116121604e-45
CA4	2.49527	2.45879218808972e-06
HERC6	2.53054	4.98384749772323e-45
RNF213	2.60184	5.11849937643896e-41
TSKU	2.61584	2.47504091617465e-22
LOC122423607	2.64111	0.000263143
LOC122425942	2.68672	0.000147656
CXCL10	2.68774	0.000109823
HES4	2.72849	3.3076487785981e-14
IFI44	2.85468	1.0038703085535e-20
TRANK1	2.85972	2.04616439192193e-51
BCL2L14	2.90078	7.5829245913353e-06
LOC122446174	2.94526	6.0288438402769e-61
LOC122423793	3.00382	9.53499063126962e-27
LOC122422833	3.00418	3.05003338917472e-22
RSAD2	3.04384	3.94086417856172e-13
IFI44L	3.08245	5.75522540130528e-18
IFIT2	3.10858	9.99559883645103e-30
LOC122445369	3.15394	7.83607531115419e-10
LOC122422848	3.17763	8.0366782963803e-27
LOC122448350	3.20771	4.79353202707003e-09
LOC122422854	3.23505	8.01215292055831e-24
AGRN	3.23548	7.29676237969078e-55
LOC122422844	3.28597	3.2740495217481e-19
EPSTI1	3.45183	4.19924670511108e-39
ZBP1	3.50089	2.84871029303399e-29
ADRB3	3.50164	5.56622416658775e-09
DHX58	3.63939	3.8411778856907e-40
MX1	3.71	3.06645570421626e-16
ISG15	3.90322	1.3597117342094e-31
RTP4	4.07337	2.78343240045543e-13
IFI6	4.18826	1.36218213995299e-36
MX2	4.76211	4.53191211478903e-48
SIGLEC1	5.56687	2.20354347993073e-42
