# Supplementary material for: Peripheral transcriptional responses to experimental SARS-CoV-2 inoculation in North American Elk cows and calves
Source: Research Square preprint supplement (doi:10.21203/rs.3.rs-6505643/v1), 2025-05-15
Supplement: Supplementary file 2 [file 138527d49d905213ccadec5f.xlsx]

## Sheet: downregulated
Supplementary Table S5 - Downreglated genes in Calves (D0xD14)
gene_id	log2fc	padj
FAM110C	-3.83519	0.0071564
TKTL2	-3.62837	0.0083601
COL3A1	-3.61222	0.00402015
TMEM35A	-3.61095	0.0231713
LOC122452424	-3.51433	0.000483273
MS4A2	-3.12948	0.00231361
LOC122430089	-3.07087	0.00362237
LOC122435692	-2.89753	0.00661308
COL11A1	-2.7445	0.0269262
MMP8	-2.70147	0.0176241
AKAP12	-2.68294	0.0348224
LOC122428012	-2.62491	0.0109334
LOC122441558	-2.56841	0.00183069
LOC122453077	-2.56599	0.0196088
KIAA0895	-2.56552	0.0187611
LRRC34	-2.54895	4.30465994454276e-06
MCOLN3	-2.54548	0.00245127
PCDH18	-2.50003	0.0358928
FOXN2	-2.46547	9.98399344281936e-29
LOC122449754	-2.45541	0.00151536
LOC122444681	-2.39517	9.50733430331294e-05
CXCL8	-2.39437	5.47663035529689e-05
CDO1	-2.36189	0.0490836
LOC122450708	-2.26039	0.00142863
ZNF354C	-2.20526	5.92903885960705e-07
PURG	-2.20387	0.0143874
LOC122424149	-2.13755	0.0468181
SCN3A	-2.06273	0.000144807
LOC122435636	-2.05049	0.049651
LOC122419920	-2.04729	0.0358928
LOC122454832	-2.04387	0.000286132
LOC122431293	-2.04036	0.022544
LOC122453546	-2.03682	9.50948244304541e-05
TRIM58	-2.01375	0.0107055
CNGA3	-2.00848	0.00661818
TRNAY-GUA_4	-1.97121	0.000431658
NEBL	-1.96588	0.00292455
CNTN1	-1.95418	0.0252209
LOC122444469	-1.9444	0.0482727
LOC122430115	-1.94028	3.43865537934706e-06
LOC122445050	-1.93532	0.000218122
SYNM	-1.91952	0.0127115
LOC122446928	-1.90093	0.00200437
LOC122420594	-1.89682	0.0293501
LOC122438286	-1.89107	0.0250625
TRNAG-CCC_220	-1.88948	0.00841307
SLC2A12	-1.88885	0.01177
LOC122425655	-1.87644	0.0332026
LOC122427768	-1.86994	0.0162338
LOC122439272	-1.868	0.00549269
LOC122422661	-1.86731	2.76960285732916e-05
GCSAML	-1.86326	0.00029914
USP45	-1.85301	1.87741385002434e-12
SPATA9	-1.85199	0.0490657
ZNF483	-1.84676	0.0225726
IPMK	-1.84225	3.5950627444975e-17
LOC122439581	-1.82688	1.45538479696351e-26
CCDC83	-1.82612	0.0284505
RASSF6	-1.81629	0.00612801
CHML	-1.80846	9.30799239072329e-16
GAS2L3	-1.80115	2.79947847084806e-06
GPR32	-1.79968	0.0321606
LOC122428289	-1.79397	6.54185181777034e-11
SCN10A	-1.78158	0.0354017
LOC122436499	-1.77917	0.00407617
LOC122447477	-1.77222	0.0033487
LOC122421383	-1.77159	9.82551428037397e-06
LOC122429716	-1.77039	0.0227641
PRKG1	-1.75709	0.00209533
TMEM245	-1.7383	5.15318724285335e-17
LOC122451794	-1.73589	0.0120443
HSPH1	-1.72699	0.0049663
LSM11	-1.72541	6.1035824206688e-06
ZDHHC21	-1.72245	4.6227181940185e-09
LYSMD3	-1.72122	1.90576955440296e-07
DTWD2	-1.71938	0.00830013
LOC122438206	-1.7177	0.00414261
ZBED8	-1.71352	0.00624751
DMD	-1.69778	0.000352479
CAVIN2	-1.69691	0.0124788
LOC122445389	-1.69615	0.00340234
RICTOR	-1.69422	2.06575058273866e-14
LOC122442065	-1.65778	0.0017791
SOX5	-1.6549	0.000389655
LOC122446245	-1.64801	0.0086746
HECTD2	-1.64433	1.76037857199608e-07
LOC122420161	-1.64288	3.81348060827411e-06
PKIA	-1.63176	0.0210527
EIF5A2	-1.63037	3.08722403968517e-07
SLC35A3	-1.63013	1.02441914707553e-08
ZNF507	-1.61494	1.26593944808999e-21
LOC122437265	-1.61201	0.00817521
SUCNR1	-1.61176	4.09759528925017e-05
SCAI	-1.60481	4.18833383212606e-09
LOC122436432	-1.60317	0.00344929
KLHL15	-1.58844	1.41857268588777e-09
PIK3C2A	-1.58758	2.87041741247797e-15
CEP85L	-1.58386	5.02243072927243e-13
LOC122436771	-1.58285	0.0208856
CD69	-1.58026	3.04901405775604e-07
ATP7A	-1.57984	1.6756910717256e-32
LOC122451047	-1.57272	9.32341782914893e-05
LOC122438265	-1.56991	0.00876172
SANBR	-1.56981	0.000156742
MAMDC2	-1.56638	5.02848506337964e-06
CEP135	-1.56497	5.20204514203836e-07
LOC122445654	-1.56304	0.0219431
KBTBD3	-1.55726	5.9625723951941e-08
ZNF597	-1.55669	0.0227956
THBS1	-1.55104	2.82764090511058e-12
USP53	-1.55035	3.67077136105731e-08
DMXL1	-1.54711	4.14339457879285e-13
SRFBP1	-1.54618	1.16135342476093e-11
GXYLT2	-1.54566	7.69173482043005e-09
METTL4	-1.54453	2.07964654010679e-08
SECISBP2L	-1.54034	1.74654526017169e-13
MBLAC2	-1.53934	3.34491257545433e-06
LOC122420587	-1.53877	1.72779643493019e-05
RBM41	-1.53818	4.67050086228731e-09
ZNF644	-1.53734	2.04029759703851e-10
IKZF2	-1.53364	3.21796089195823e-06
EPB41L1	-1.5317	0.0144074
ATAD2B	-1.53073	5.97922619233622e-15
EDEM3	-1.53069	3.83593029006362e-10
LOC122455051	-1.52894	0.000250217
DNAJB4	-1.52859	0.00110162
MAP3K2	-1.52827	3.2898279596412e-15
LOC122444794	-1.52799	3.65787246979254e-09
N4BP2	-1.52626	2.86620753387866e-08
TOMM20L	-1.51838	0.00723298
SLC2A13	-1.5179	0.000530968
SKIL	-1.51453	4.22453962381785e-07
HIPK3	-1.51397	1.09471752466115e-14
TRPC1	-1.51367	0.0250019
CCNB1IP1	-1.51213	9.70578202147429e-14
MYBL1	-1.51132	3.10329179737967e-09
LOC122429087	-1.50678	0.00745119
CCDC186	-1.50619	1.66897722710222e-09
FAM126A	-1.50575	3.12086669219111e-14
POLK	-1.50526	1.66563323169701e-09
FGF2	-1.50467	0.00115409
FSD1L	-1.50466	2.01548113082542e-07
NUDT12	-1.50326	4.12919797625291e-10
FANCB	-1.50233	0.000260682
CPEB3	-1.50184	2.82751665390721e-12
LOC122435446	-1.50094	1.5159953568389e-05
MIER3	-1.49724	7.05944015638334e-06
SP4	-1.49718	3.40646899275122e-08
LOC122443727	-1.49711	0.00252992
OXR1	-1.49564	3.04701152770653e-11
SASH1	-1.49097	0.0185425
RPS6KA6	-1.49092	0.000127688
STK26	-1.48672	1.52313950637593e-13
LOC122427093	-1.48413	0.00385439
EFCAB5	-1.47919	0.00592715
PKN2	-1.47724	2.23146158239707e-14
MINDY2	-1.47696	7.14793934169057e-14
LOC122420611	-1.47685	0.0115168
ARL5B	-1.47455	6.53706365637138e-09
LOC122447639	-1.47393	0.0294403
MAP4K3	-1.47387	3.63201048549857e-07
C4H5orf24	-1.47356	6.26868930040497e-10
PYGO1	-1.47317	8.79361969150951e-10
KLHL28	-1.47216	2.55678106997989e-05
SLC38A2	-1.47118	1.71514983591395e-12
PLCXD2	-1.47066	0.000130486
HOOK1	-1.47065	3.99696395329995e-09
NBEAL1	-1.46929	3.78784223908088e-06
SLC12A2	-1.46925	6.33112685233631e-12
ETNK1	-1.46784	2.22858511860817e-07
ZNF654	-1.46211	1.03679302644394e-06
THAP6	-1.45995	0.00110728
LOC122440459	-1.45557	4.6303490956379e-17
TMED5	-1.45489	1.07863041450844e-05
PGAP1	-1.45362	1.55972467342709e-06
LOC122427084	-1.45278	3.81973056431616e-05
WDR44	-1.45267	1.07996183490959e-11
PTAR1	-1.44769	5.04719678050874e-13
ZNF711	-1.4424	1.21347206310115e-08
LOC122438224	-1.44153	0.000777335
LOC122434400	-1.44127	1.90284424955155e-18
RSRP1	-1.44082	3.57205622451641e-10
LOC122453943	-1.43993	4.54975396560441e-13
ZDHHC2	-1.43782	3.36981594880318e-05
CEP97	-1.43645	6.81688932499928e-13
PPFIA2	-1.43566	1.91588094988464e-08
SNTB2	-1.43454	4.67959762242275e-15
STARD4	-1.43311	5.52570315152122e-09
PPP1R12A	-1.43251	1.52313950637593e-13
GCNT4	-1.43198	6.02528981313242e-09
LOC122422850	-1.4316	0.0207471
MEIOC	-1.43158	0.0142166
TAF1A	-1.43055	1.11737832571772e-05
LOC122440374	-1.42775	0.0409854
ERBIN	-1.42446	2.40293811156275e-11
LRIF1	-1.42387	4.81086261893869e-13
ZNF571	-1.42097	1.69452780405248e-08
FCGR1A	-1.42014	0.0137389
LOC122439761	-1.4182	0.000643415
LOC122430496	-1.41782	0.00023061
ZNF518A	-1.41681	2.19763419050271e-07
SEMA3C	-1.41668	0.0182889
AHR	-1.41643	6.33112685233631e-12
TET2	-1.41119	6.57360624086351e-23
EFR3A	-1.40806	6.35840038570975e-09
OSBPL8	-1.40608	1.46937595631904e-07
LOC122425524	-1.40498	7.76047673625337e-05
CLIC4	-1.4043	9.4116453072936e-12
STXBP4	-1.40193	0.00169805
LATS1	-1.40182	1.51599014892851e-09
LOC122449429	-1.39972	7.03566288141075e-09
LOC122420159	-1.39923	0.0308631
CPEB2	-1.39821	2.33294735423628e-11
ZBTB1	-1.39799	5.73247236349208e-09
TMEM106B	-1.39613	3.69595365686166e-08
UHRF1BP1L	-1.39368	4.60487454833985e-11
ZKSCAN8	-1.39326	1.44131835044722e-10
CALCRL	-1.39205	0.000104767
ACVR1C	-1.39095	0.0221398
FBXL3	-1.38883	5.80980852753018e-14
ABHD17C	-1.38411	0.0145665
SRSF12	-1.38405	6.43868583845615e-06
UHMK1	-1.38341	3.30355607332726e-08
LOC122438556	-1.38128	7.52039080273404e-05
CEP170	-1.3812	2.00950891560541e-15
DYNC2LI1	-1.38102	0.000911171
ARHGEF38	-1.38101	0.0127213
ZFX	-1.38081	9.66609788075505e-11
SOCS4	-1.37903	2.16451619796432e-07
LOC122433002	-1.37799	9.0180588580631e-24
IL6ST	-1.37739	2.89495963064722e-07
RASSF8	-1.37532	0.01842
MAP3K1	-1.37457	1.33814215136482e-08
RRH	-1.37427	0.000246331
KLHL24	-1.3724	4.23555194285278e-08
LOC122450408	-1.37171	0.0211682
PPP1CB	-1.37076	3.04962301715192e-07
LOC122443752	-1.3695	0.00250862
SMC5	-1.3693	2.09012312090639e-07
SPIN1	-1.3686	2.53321616411027e-11
YOD1	-1.36656	3.83818531098149e-09
LOC122420179	-1.36642	0.00563623
CFAP97	-1.36416	9.36875759054435e-07
ERCC8	-1.36379	0.000798754
GPR174	-1.3616	3.27961557789368e-07
MRTFB	-1.36139	2.5462860575187e-09
PPP1R9A	-1.36083	6.33360825431025e-07
LOX	-1.35757	0.0064261
DENND5B	-1.35178	3.26538827342347e-10
LOC122436475	-1.3516	2.79616587203155e-11
RFX3	-1.34956	2.73884942747297e-09
LOC122429209	-1.34916	1.28439563071819e-06
DBT	-1.3491	2.62084854147989e-07
STAG2	-1.34732	2.04029759703851e-10
ZC2HC1A	-1.34721	0.000223043
FAM102B	-1.3461	6.19139408084491e-12
SENP7	-1.34578	2.01369963143776e-10
ATP13A3	-1.34436	5.62497582736517e-09
TRNAG-UCC_121	-1.34344	0.0323419
UBR1	-1.34038	1.03295514006631e-24
LIG4	-1.34037	3.11090405439309e-08
MAN1A1	-1.3386	6.32566427474285e-08
SLC5A1	-1.33612	0.00205275
INTU	-1.33483	0.000102695
CUL5	-1.33295	3.11664175989924e-06
GEN1	-1.33201	3.73048316774297e-05
TMF1	-1.33173	1.17256477328991e-12
ZNF420	-1.33162	1.66722524065427e-05
ZNF280D	-1.33106	7.61856868950794e-08
PPP1R15B	-1.32927	2.33294735423628e-11
SLC25A36	-1.32858	1.30111236157066e-07
TTBK2	-1.32695	3.89995064498546e-10
LOC122442624	-1.32693	5.46634937888504e-05
MCTP1	-1.32608	2.88639592684809e-05
LRRC58	-1.32514	5.55252802070067e-09
CCDC171	-1.32466	7.27251162880819e-06
TBC1D32	-1.32397	0.000266257
SLC30A1	-1.32359	8.22257023092334e-07
TP63	-1.32273	0.00295748
LOC122444242	-1.32047	0.009873
FNIP1	-1.31975	4.15039189663564e-11
SMIM13	-1.31869	1.0666734681599e-13
PRTG	-1.31783	2.21609912718616e-05
NRIP1	-1.31714	4.93541047718619e-13
NPNT	-1.31545	0.0220957
KBTBD8	-1.31523	3.36712617911361e-06
LOC122420388	-1.31462	0.00288713
INTS2	-1.31376	9.92086755484968e-08
PEX13	-1.31013	8.77039778876624e-06
ZBTB11	-1.30974	1.30255544549984e-10
PM20D2	-1.30919	9.59560748545638e-13
JMJD1C	-1.3085	5.59082800990961e-17
GPR137C	-1.30837	0.0131427
PLEKHG1	-1.30812	0.00038708
MYSM1	-1.30697	1.69276625208427e-16
PPIP5K2	-1.30676	7.58587138638943e-13
SPTY2D1	-1.30675	4.39633657674954e-11
TAOK1	-1.30494	2.34513797001319e-13
CEP120	-1.30057	8.98458678460884e-09
LOC122422362	-1.2999	0.0422809
PDS5A	-1.29894	1.43883971347557e-28
HLTF	-1.29873	4.00331639654006e-07
IREB2	-1.29545	3.93863212022408e-10
LOC122435411	-1.29517	0.0023626
TFRC	-1.29504	3.0045615410656e-08
SMAD5	-1.29384	1.07102001028797e-06
KRAS	-1.29368	6.37339971954592e-05
ZNF248	-1.29321	4.79467520547214e-22
ENPP4	-1.29121	1.58725442622924e-10
SLC5A3	-1.29112	1.18233980973459e-14
LOC122420030	-1.29095	4.51271662764364e-07
TGFBR1	-1.28972	9.4588105697685e-07
WASHC4	-1.28818	4.92502384550101e-08
SH3BGRL2	-1.28542	5.8448863869738e-06
ABCC4	-1.28496	1.15302110478167e-10
LOC122452467	-1.28313	0.042999
TNPO1	-1.28284	1.18660782551676e-09
MYNN	-1.28234	4.00178565932019e-09
QSER1	-1.28207	1.06228139330607e-07
PANK3	-1.28148	1.66839363163555e-08
SNX16	-1.28031	3.76291130920549e-06
GPD2	-1.28027	2.29384592230902e-18
LOC122446734	-1.27969	0.00247263
YTHDC2	-1.27788	4.8166346422733e-11
LOC122427872	-1.27605	0.00665196
ADAM10	-1.27532	4.18205602926471e-12
LANCL3	-1.27474	2.76082335503053e-05
LOC122443454	-1.27462	0.00693166
LOC122436444	-1.27282	0.000142819
FAM135A	-1.27257	1.25246817340777e-09
CHORDC1	-1.27186	4.31333149753358e-08
BTBD8	-1.27072	0.000128481
B4GALT6	-1.2701	1.79638668423987e-05
FCHO2	-1.26963	1.17649246828533e-09
CCDC126	-1.26847	0.00461401
FAR1	-1.26803	1.4054385572701e-08
PROSER2	-1.2669	0.00137216
CCDC117	-1.26659	1.94189601577949e-08
FPGT	-1.26583	1.09825949204286e-05
SPOPL	-1.26496	1.90561326469499e-10
ORC2	-1.26486	1.49555283417985e-13
DNAL1	-1.26285	1.94531979664304e-10
SYNPO2	-1.26175	0.022611
LOC122440811	-1.26132	5.37796572833268e-09
LOC122434312	-1.26044	3.78864969495737e-23
GALNT7	-1.25862	5.97760858973489e-08
ZNF484	-1.2574	1.92075335277774e-05
KIAA1109	-1.25692	9.98399344281936e-29
TMEM33	-1.25679	1.67813362508433e-13
TXNDC16	-1.25436	3.26003814528222e-07
LCORL	-1.25384	4.67050086228731e-09
NCOA7	-1.25361	4.20874748215675e-08
PHACTR2	-1.2501	1.28968598441622e-08
ZNF84	-1.24992	2.33362644214456e-07
RSBN1	-1.24883	4.97414942411995e-17
FRMD6	-1.24864	1.32869540918587e-07
HELB	-1.2484	5.29939354011286e-09
LOC122447374	-1.24768	1.62425580249858e-07
THNSL1	-1.24754	3.14184680210837e-05
CD226	-1.2471	1.66053481485967e-08
FAM169A	-1.24665	0.0019841
FMNL2	-1.24535	0.000472416
ANKRD44	-1.24529	9.59875346224322e-16
CMTR2	-1.24477	4.27256953394558e-07
LOC122420593	-1.24408	1.13650590510031e-10
SH3YL1	-1.24185	0.00128032
ABHD13	-1.23922	8.54434246896898e-08
ASCC3	-1.23892	5.81614663759521e-13
ECT2L	-1.23842	0.0365406
JAK2	-1.23816	3.89573864750103e-09
MARCHF7	-1.23784	1.01963535926099e-12
RO60	-1.23742	2.16581000705246e-06
PNRC2	-1.23675	1.79649031648036e-09
LOC122446128	-1.23665	0.0079422
LOC122421411	-1.23539	1.17562160096263e-06
SP3	-1.23469	1.4721101663511e-10
TMEM64	-1.23454	4.39657889409748e-06
DCUN1D1	-1.23432	1.2627746449105e-07
LOC122434599	-1.23183	2.13407254825963e-08
DNAJB14	-1.23123	7.80227392157499e-07
TMEM116	-1.23115	2.39833785690032e-06
MIGA1	-1.23058	7.90543191634985e-06
TMEM168	-1.22895	3.10370234839252e-06
RCAN3	-1.22843	4.07936585845089e-11
TMOD3	-1.22839	2.98038089679332e-08
RIF1	-1.22808	1.8142182088396e-07
GFPT1	-1.22726	7.12240373932644e-06
RAPGEF6	-1.22682	9.08946615893691e-12
LOC122428174	-1.22639	8.34419294847324e-07
ZNF567	-1.22482	0.000183704
UTP15	-1.22459	4.05878140191816e-08
CDKL2	-1.22409	0.000460428
LOC122438655	-1.22178	4.89177731469591e-05
ADAMTS5	-1.22104	0.0169898
FAM126B	-1.22044	6.07416617225827e-08
EGR3	-1.2202	0.000110309
SHOC2	-1.21919	3.1635589418755e-07
UBN2	-1.21898	1.81574111311164e-15
LRRK2	-1.21758	7.78840733345738e-13
TAB3	-1.21721	1.16189182192561e-09
ZDHHC20	-1.21702	2.26034857010019e-06
RALGAPA1	-1.21694	1.11559477146103e-12
SNX13	-1.21599	1.265323157557e-07
MBNL1	-1.21549	6.01079629273911e-07
MICU3	-1.21212	0.000166468
BBS10	-1.21128	0.000105251
CCDC82	-1.21111	2.77386097838774e-07
LOC122439762	-1.21077	2.1028767844224e-12
SENP6	-1.21072	4.67050086228731e-09
SLC4A7	-1.20922	3.49404449894919e-18
POLQ	-1.20868	2.74429351727477e-12
NUFIP2	-1.20723	2.29713694739679e-16
DIPK2A	-1.20584	1.47133611159103e-06
ZNF875	-1.2057	0.00265906
FBXO30	-1.20558	2.7133929923748e-14
MORC3	-1.20511	1.14088707476545e-09
ZFP69B	-1.20482	0.000405945
ZZZ3	-1.2042	4.32697748754308e-08
SESN3	-1.20403	1.00156976765807e-10
TTC39B	-1.20364	3.11421416478506e-07
SUV39H2	-1.20323	2.36750100742403e-07
PHF6	-1.20274	5.12721149539266e-05
FBXO45	-1.20224	8.70346688575583e-06
APPL1	-1.20195	1.06091497234746e-06
LBR	-1.20094	2.102189979922e-14
GTF3C3	-1.20057	6.91930696325877e-11
LOC122436608	-1.20006	4.58365818492945e-06
FHIP2A	-1.19712	6.76077817460942e-11
LOC122451878	-1.1965	1.13093087723263e-07
TMEM107	-1.19487	3.34612768024521e-08
LOC122439842	-1.19414	6.06334751571382e-07
FAM241A	-1.194	4.8497933038983e-05
CARNMT1	-1.19364	5.91175550919343e-05
USP33	-1.19302	3.19643790777027e-09
HRH1	-1.19264	0.0120582
C27H21orf91	-1.19242	2.06739350825308e-06
PDS5B	-1.19169	3.8841152052981e-08
CACNB4	-1.19032	7.71548531600284e-05
CDK17	-1.18994	1.33820024516705e-07
LOC122420697	-1.18973	0.0420262
LEMD3	-1.18861	7.47927996039742e-08
ZFP36L2	-1.18701	7.44484609790257e-06
NIN	-1.18676	1.22282776748442e-12
TP53INP1	-1.18605	1.51226974077633e-11
PID1	-1.18575	1.23688853665743e-05
ZGRF1	-1.18509	9.75144473754153e-06
MANEA	-1.18443	7.09835437018026e-06
CNST	-1.18343	1.62606862165488e-07
FNBP1L	-1.18235	3.84902503557155e-06
ATG2B	-1.18191	1.51226974077633e-11
LOC122434601	-1.18073	1.89568508561114e-09
LOC122420586	-1.18006	0.00118748
MRS2	-1.17949	1.75427023412622e-06
TRMT13	-1.17943	8.98458678460884e-09
SLC4A4	-1.17773	3.85348120782053e-05
FBXO11	-1.17638	9.13119582230606e-12
CEP76	-1.17472	1.2855095412921e-11
LRP12	-1.17412	8.09321681850713e-13
PPP4R2	-1.17383	1.37824854836214e-06
HGF	-1.17217	2.52016408448908e-07
ZBTB6	-1.17159	2.91959359523256e-07
CTTNBP2	-1.16967	0.0178411
MTMR12	-1.16958	1.77406201217842e-12
SLC19A2	-1.16955	9.45287144392253e-10
LOC122450709	-1.16948	0.0184425
LOC122439895	-1.16894	0.017315
SEC24A	-1.16791	5.68103367954157e-10
AGL	-1.16788	4.68641916909291e-09
BMPR2	-1.16741	9.8716450159402e-07
ST8SIA4	-1.16685	2.32252505541614e-09
AKAP11	-1.16553	1.16135342476093e-11
OSTM1	-1.16551	1.65692115930357e-06
PRKCI	-1.16526	1.38714377558598e-07
FLVCR1	-1.16485	2.14229083870488e-08
SCD	-1.16429	1.19453124925775e-05
RESF1	-1.16429	1.73837047338806e-07
ESCO1	-1.16355	1.17562160096263e-06
ATAD2	-1.1627	1.68160375968051e-08
FNDC3A	-1.16216	6.43023665768226e-09
LMBRD2	-1.16186	5.34711246616788e-06
PDP1	-1.16114	1.03380627386298e-06
LOC122436738	-1.15885	0.00531168
HERC4	-1.15878	3.21749498226674e-08
GLS	-1.15858	1.36990748653807e-09
CLEC6A	-1.15848	0.0137649
GOPC	-1.15813	2.62252256342582e-11
KIF3A	-1.15726	1.15053331456355e-05
SLC16A10	-1.15701	0.00740693
TOGARAM1	-1.15664	1.77406201217842e-12
AFF4	-1.1565	3.28690163640858e-11
RBM27	-1.15575	9.32432556036013e-10
FGFR1OP2	-1.15494	6.90584328740312e-06
CTDSPL2	-1.15272	1.29340201917794e-08
KPNA5	-1.15236	0.00323452
PCNX4	-1.15083	7.83982617570555e-07
MED13	-1.1508	9.44735773869935e-09
ACAP2	-1.15036	1.68035373978813e-06
TRAPPC8	-1.14751	2.89781301335315e-12
LOC122451261	-1.14429	1.84372345043015e-06
LOC122442250	-1.1439	4.48086566884961e-05
HIPK1	-1.14358	1.9751111374713e-17
PHC3	-1.14202	8.06960311849048e-15
MED23	-1.13775	6.30203359920871e-13
FANCM	-1.13726	1.08999480188326e-08
SIKE1	-1.13702	4.55597053063598e-08
MB21D2	-1.13683	0.000169555
ITGA6	-1.1367	5.52352998251659e-07
LOC122425488	-1.13528	1.48976777959746e-06
LOC122420758	-1.13469	1.44820126819502e-20
CLEC4D	-1.13435	6.15478472201875e-05
TRIM33	-1.1343	1.15997733995981e-09
LOC122440605	-1.13368	0.0405539
CLK1	-1.13355	2.0412824205928e-09
SLU7	-1.13351	2.03215042832846e-07
ATXN3	-1.13337	1.03509672121641e-07
LOC122435217	-1.13334	7.14157398606295e-05
LOC122423750	-1.13301	0.0152296
PAPOLG	-1.13198	2.33294735423628e-11
MSH2	-1.13173	3.31231792874478e-06
PLSCR4	-1.13143	4.34186416565166e-08
TRPM7	-1.13131	8.68381751974267e-08
PPP4R3B	-1.1313	2.14864722613892e-06
LOC122428082	-1.13127	8.5377319892484e-05
SCN11A	-1.13007	0.0417371
GEM	-1.12963	0.0336079
IMPG2	-1.12954	8.6886112687589e-07
ZNF568	-1.12945	0.00159846
TMEM41B	-1.12859	0.00014271
LOC122448273	-1.12815	0.0119832
LOC122453172	-1.12759	0.00089242
PDE12	-1.12517	9.30020802284738e-06
CLK4	-1.12498	4.97322610388473e-10
SIRT1	-1.12357	4.73288751228583e-07
SOCS5	-1.12291	4.12327179858194e-10
FAM13B	-1.12193	2.82468132314365e-07
ARHGAP5	-1.11984	0.000999142
ZNF790	-1.11948	0.00223508
CPEB4	-1.11931	7.04737976582508e-14
FAM91A1	-1.11925	1.09355744720743e-06
RNF2	-1.11812	2.75912071546341e-07
ALCAM	-1.11781	0.00014464
BACH1	-1.11733	3.07642464339519e-11
ZDHHC17	-1.1172	2.92140042236225e-11
UBXN2A	-1.11653	0.00011146
MBNL2	-1.11602	9.98427623444328e-08
CSNK1G3	-1.11601	1.32052837020581e-07
GNB4	-1.11573	0.000330146
LYST	-1.11571	8.34325016195678e-13
TNKS2	-1.11553	2.00969684203537e-08
SGPP1	-1.11533	0.000366274
TOB1	-1.11515	1.87329494754216e-08
DSEL	-1.11494	9.0180588580631e-24
GLCCI1	-1.11459	1.52313950637593e-13
ZMAT3	-1.11447	1.90709177478086e-06
SYCP2	-1.11422	0.00221677
USP1	-1.11373	5.95046399092446e-05
VCPIP1	-1.11234	3.27961557789368e-07
KLHL9	-1.11225	1.91070893131058e-09
RAB33B	-1.11151	1.45906319565658e-08
TBL1XR1	-1.11112	6.70086706006357e-05
SMARCAD1	-1.11027	4.20008718933189e-08
LOC122421041	-1.11021	0.00788244
DOCK4	-1.1083	1.39507118461198e-07
CPNE3	-1.10621	6.95287799485166e-09
ZNF280C	-1.10584	4.36353028382999e-09
CLASP2	-1.10522	1.44299870460125e-10
THAP2	-1.10477	3.39624123691515e-05
TET3	-1.10296	3.34962547686138e-09
FKBP14	-1.10268	0.0219553
GNAI1	-1.10248	0.00136027
TASOR	-1.10226	3.14084351182156e-07
LOC122421202	-1.10194	0.0223341
PPTC7	-1.10136	2.40009558060055e-10
DDX3X	-1.10119	2.55370988182113e-17
BRWD1	-1.10055	3.40023365785705e-12
HDAC9	-1.09969	2.69897331916828e-07
ADD3	-1.09959	2.89401790265163e-09
ZBTB33	-1.09952	1.27068310573818e-06
ZNF367	-1.09939	0.00293672
LOC122448236	-1.09849	5.17178278547158e-07
POLR3G	-1.09663	3.2415624911025e-05
FYTTD1	-1.09636	6.7199674061663e-05
BIRC3	-1.09628	3.6070525313725e-07
PLAG1	-1.09495	0.0238843
TM9SF3	-1.09493	4.1889702058799e-06
TMX3	-1.09422	2.08838446683428e-07
CDC40	-1.09343	7.82458379731187e-08
ATP11C	-1.09334	8.3758080364068e-06
LOC122424437	-1.09298	0.0244341
SLC39A6	-1.09286	2.1510361245267e-06
STYX	-1.09265	0.000309387
LOC122431506	-1.09226	0.00734398
SERINC5	-1.09178	3.48346371283181e-14
ARAP2	-1.09166	1.87808295753421e-06
CDC14A	-1.09094	2.95883055337815e-08
MMS22L	-1.09082	6.82172064214796e-07
PRDM10	-1.09061	7.97336614426918e-13
LOC122422105	-1.09013	0.00142069
PRPF39	-1.08995	3.03391634336927e-07
PTGFR	-1.08982	0.00130191
ELMOD2	-1.08952	0.000441255
LOC122428204	-1.08927	0.00285566
MTREX	-1.08906	4.50834119442803e-09
LOC122423922	-1.08785	0.00550997
GABPA	-1.08735	1.07592467882637e-10
ZNF614	-1.08668	1.45493650885095e-05
PREPL	-1.08661	1.81067272201832e-06
SMCHD1	-1.08652	1.5921023390458e-08
SLC7A11	-1.08636	0.0274927
LURAP1	-1.08599	9.43026141534364e-06
LOC122438789	-1.08487	0.00531086
RAB8B	-1.08381	8.04717654457045e-07
CEP19	-1.08365	6.51715824554926e-05
TBC1D15	-1.08339	8.96078669025649e-05
PROX1	-1.0833	0.0135475
AGPAT5	-1.08313	8.34059412707756e-06
SGCB	-1.08271	0.0443912
LTN1	-1.08164	9.61607639742382e-08
RNF19A	-1.08146	1.42949856458429e-08
KLHL41	-1.07981	9.87594377624672e-05
ZBTB10	-1.07976	7.72952264166858e-06
SASS6	-1.07955	4.64708279336345e-05
NCKAP5	-1.07803	0.045878
AGO3	-1.07697	7.07508937719741e-08
ARID2	-1.07692	1.77406201217842e-12
TMTC1	-1.07689	0.00415814
RMI1	-1.07614	0.0011463
RC3H2	-1.07503	2.4880290845632e-10
ZNF157	-1.0745	0.00227
SEPTIN7	-1.07409	5.02848506337964e-06
SMC2	-1.07406	1.46392627210613e-05
WDR47	-1.07317	2.53256648285623e-10
LOC122435072	-1.07226	4.85554032307672e-06
TMEM30A	-1.0722	3.040612708416e-11
PIKFYVE	-1.0717	1.01801847340945e-12
TYW5	-1.07051	4.67050086228731e-09
BROX	-1.07019	3.85304687989732e-06
LOC122422008	-1.06944	0.00138024
ATP11B	-1.06919	1.70991833130317e-07
FMR1	-1.0691	1.16182217959459e-08
NIPAL1	-1.06883	6.54770414212352e-06
ZBTB38	-1.06747	6.58589484567887e-07
LOC122454300	-1.06664	8.97266584038255e-08
TFAM	-1.06664	1.10354514320093e-05
ZBTB41	-1.06663	5.02548508619703e-08
MIER1	-1.06653	5.20369539373274e-07
CRK	-1.066	6.53706365637138e-09
GHR	-1.06593	0.0429819
CDC27	-1.06535	7.07373402124669e-08
APAF1	-1.06469	3.34962547686138e-09
BTAF1	-1.06396	1.51544221592258e-08
PMS1	-1.06371	4.84027369821384e-05
FEM1B	-1.06343	1.78156344434973e-08
GTF2A1	-1.06319	4.26456140828288e-05
ROCK2	-1.06319	5.01373556712552e-06
TCF12	-1.06297	8.39580068188964e-08
PKD2	-1.06294	0.0229026
EVI5	-1.06286	3.13316133736444e-06
SEC23A	-1.06267	2.75659983151126e-08
UBA6	-1.06266	1.86026568102093e-05
TMEM123	-1.06251	1.24595069402757e-05
PPFIBP1	-1.06237	0.000304078
RIC1	-1.06223	1.71759748253509e-15
NCOA2	-1.06205	3.83621305764169e-15
NR2C1	-1.061	2.2860865508696e-07
PCF11	-1.06099	2.39007732233501e-11
MAPK6	-1.06097	2.67114282770273e-06
ITGA1	-1.06052	5.6534118401343e-05
TWSG1	-1.05931	3.60020218788176e-05
HSP90AA1	-1.05812	0.0352937
CCNG2	-1.05784	7.07780067604312e-07
ABHD18	-1.05721	3.82613426255061e-06
LOC122436762	-1.05719	0.0010312
MBTD1	-1.05706	1.01267367139361e-07
XRN1	-1.05639	2.77476396780354e-08
ASXL2	-1.05446	2.09939659467477e-10
SHPRH	-1.05415	6.8567226007275e-10
PTBP2	-1.05357	0.000110229
LRRC40	-1.05342	0.000117153
LOC122420166	-1.05309	0.000702664
SETBP1	-1.05268	5.3937190679285e-06
RB1	-1.05258	7.89164982280653e-08
KLF3	-1.05241	9.68430189055533e-09
UGCG	-1.05239	3.37556704753664e-06
CEP350	-1.05194	1.54429965076289e-12
BMT2	-1.0507	1.22922842924004e-06
HSPA13	-1.05046	4.5668422123308e-05
PDZD8	-1.0502	1.14939841716157e-16
LOC122444800	-1.04918	2.92478206869233e-08
ZBTB44	-1.04832	2.37704185880307e-07
TAF4B	-1.04691	4.54775838395811e-11
EXOC5	-1.04684	9.12510034996027e-05
IMPACT	-1.04663	0.000662667
UEVLD	-1.04629	2.42577368167957e-08
STK17B	-1.04628	9.94897866658213e-10
ITGAV	-1.04547	1.56362263346626e-06
RAB27A	-1.04426	1.12522178404586e-07
UBR3	-1.04328	1.90709177478086e-06
LOC122420584	-1.04218	1.49704022368065e-07
NAV3	-1.04176	0.020684
DAB2	-1.04146	0.00242672
DOCK11	-1.04142	1.01373161111099e-07
LRRIQ3	-1.04075	0.0189929
ZSWIM6	-1.04072	4.72797431207395e-14
SAR1B	-1.04034	1.15160176604468e-08
GMFB	-1.04009	0.000424101
LRIG2	-1.03919	7.97336614426918e-13
IKZF5	-1.03909	9.30651109890181e-07
SACS	-1.03811	1.17190910304388e-11
ZC3HAV1L	-1.03811	1.06883211450097e-11
G2E3	-1.03787	0.000145149
VPS13A	-1.03733	1.36511759210423e-07
ZYG11B	-1.03638	1.63879676524172e-08
ATM	-1.0359	3.50995192799861e-09
DMXL2	-1.03581	1.19379098724809e-05
NR1D2	-1.03564	0.000340583
LOC122429252	-1.03454	0.0437898
APC	-1.03395	2.60883602293933e-10
CSGALNACT2	-1.03382	1.44131835044722e-10
ATR	-1.0338	2.59861030496154e-08
RAB27B	-1.03379	4.04556608879636e-05
DNAJC25	-1.03377	2.20705138109549e-10
NR3C2	-1.03333	0.00374525
SF3B1	-1.03288	4.72797431207395e-14
LOC122439416	-1.03284	3.31156916510481e-08
RASA1	-1.03233	3.70621485173451e-10
FRS2	-1.03127	7.66412673872097e-10
MRAP2	-1.03089	0.0214577
RC3H1	-1.03064	4.10946602861526e-07
EMP1	-1.02995	2.67114282770273e-06
STRN	-1.02981	3.99386623482846e-08
PCGF5	-1.02874	0.000286466
MAP4K5	-1.02814	0.00223508
SMARCA5	-1.02803	1.12830136356742e-07
LOC122441418	-1.02759	1.46570651725765e-06
KLF5	-1.02636	7.0436869441399e-06
ICE2	-1.02623	7.47492335152032e-06
HAUS6	-1.02622	0.000620258
PCMTD1	-1.02616	5.78142930333011e-11
SMC4	-1.02592	9.27475574813119e-05
ETAA1	-1.02512	0.00110184
WIPF1	-1.02496	2.89781301335315e-12
LOC122421118	-1.02493	8.64546305943143e-08
DR1	-1.02441	0.000394093
ELK4	-1.02285	1.49473203539988e-06
LRRC57	-1.02259	1.46915541387086e-08
C16H5orf34	-1.02132	0.00157176
SLK	-1.02116	3.25514435319379e-07
CDH5	-1.02078	0.00241839
USPL1	-1.02067	4.46816606923946e-10
ELF1	-1.01976	1.77406201217842e-12
XPO1	-1.01949	8.14963970273327e-07
ZBTB37	-1.01863	7.14793934169057e-14
LOC122427243	-1.01845	2.26034857010019e-06
C23H18orf54	-1.01793	1.30014734430249e-05
NAB1	-1.0175	3.16989096768024e-07
PARD6B	-1.01727	0.00116868
CERT1	-1.01708	2.85636358339399e-07
ZBTB18	-1.01685	5.19509650503284e-11
UBE3A	-1.01638	1.22091373490905e-06
EMB	-1.01612	1.94425490159578e-06
YIPF4	-1.01607	1.15379780908152e-09
LOC122446019	-1.01597	0.0418776
METTL15	-1.01596	0.00562052
SUCO	-1.01556	1.11743261899195e-07
OSBPL11	-1.01504	1.42564444575436e-06
ZBTB26	-1.01485	1.69300387250743e-07
RSAD2	-1.01437	0.004178
TMEM220	-1.01403	0.0293287
FGD4	-1.01403	7.17823141661017e-07
FBXO48	-1.01376	3.40646899275122e-08
SMG1	-1.01228	7.19244042407222e-18
SCML2	-1.01153	0.00571583
CD200R1	-1.01152	8.23783857423108e-06
C1GALT1	-1.01147	0.00011509
SUZ12	-1.01145	6.22083434388064e-05
MSL2	-1.011	1.58151551575578e-07
IFT80	-1.01025	0.000535677
RANBP6	-1.01008	1.71050464717143e-05
PLEKHA1	-1.01001	5.47663035529689e-05
PGM2L1	-1.00996	0.000181056
TBC1D23	-1.00972	2.31757267955109e-09
LOC122428300	-1.00907	0.012384
LOC122433311	-1.00889	0.00938702
USP32	-1.00878	9.86407299117987e-10
UBA5	-1.00856	1.57255180712246e-05
CLOCK	-1.00847	1.06492441234815e-05
HOOK3	-1.00844	1.00717920992088e-07
LMLN	-1.00829	0.00113752
LGALSL	-1.00823	4.31682577405176e-05
LOC122452371	-1.00807	0.00087697
MMGT1	-1.00804	0.000155433
PDIK1L	-1.00749	0.000557089
LOC122449992	-1.00723	9.05049134004088e-13
PCM1	-1.00717	9.81139432912398e-07
MAN2A1	-1.007	6.89539394550055e-06
MYLK3	-1.00683	0.00440228
PPEF2	-1.00663	0.000289659
ANKRD46	-1.00525	2.09975503031883e-06
CREB1	-1.00484	1.95610018487696e-06
JMY	-1.00436	1.56453347077261e-05
SLC26A2	-1.0041	1.76378394529588e-07
CREBRF	-1.00385	3.81999445967424e-10
IL18R1	-1.0038	2.10246732853889e-08
TASOR2	-1.00302	9.55301794494776e-16
TMEM161B	-1.00076	2.77281545868029e-05
DNAJA1	-0.999911	0.00201002
MDM4	-0.999472	4.18808580832812e-10
ZMYM1	-0.998492	1.20118255899742e-06
CEP152	-0.997892	0.000190917
EXOC6	-0.997828	4.52648160970856e-07
LOC122428878	-0.997059	0.000133384
NCOA3	-0.996666	2.32821586938997e-10
PPM1L	-0.996449	1.7091267012393e-05
REL	-0.996375	3.04242042313762e-16
HPGD	-0.996337	0.00535921
OCLN	-0.996217	0.0265724
POGLUT3	-0.996056	4.82271836684572e-05
MINPP1	-0.996011	0.0013165
KATNBL1	-0.995858	0.00472619
PI4K2B	-0.995792	0.000483273
PUM2	-0.995692	4.80093088651708e-08
RFX7	-0.99568	4.85061412765177e-06
DCAF10	-0.994962	5.95287652648918e-07
RRM2B	-0.993979	4.17124439464886e-06
MIB1	-0.993469	6.26262655448842e-09
OTUD4	-0.991916	9.6306691286726e-12
TSC22D2	-0.990855	3.26091040391245e-08
MOB1A	-0.990584	1.66403688963003e-07
HSPA8	-0.990381	0.000916009
CNOT6	-0.989828	1.07555384048194e-05
CKAP2	-0.98978	2.18606931152766e-05
GPM6B	-0.989482	6.92567315372287e-05
LOC122454357	-0.989384	2.23363114366228e-05
LOC122420719	-0.989079	0.00192469
DIP2B	-0.989015	2.0152214084156e-13
BDP1	-0.988401	1.62563946521553e-09
GSTCD	-0.987687	0.000210532
TWF1	-0.987607	0.000118264
GCA	-0.987163	0.000336917
PPM1K	-0.987005	3.88975228182514e-05
KLF12	-0.986783	9.59864649406373e-06
CAB39	-0.986691	2.8019645824868e-07
MATR3	-0.986231	1.82028901218708e-05
FBXO33	-0.9862	3.61229476960556e-07
ITCH	-0.986105	3.27961557789368e-07
SELENOI	-0.985961	5.67026127952731e-09
SLC30A9	-0.984847	6.25970870004201e-06
RNF111	-0.984713	7.7899570800753e-13
KRIT1	-0.984656	1.48182435402517e-11
KANSL1L	-0.984088	8.52333826244093e-06
HMBOX1	-0.984074	7.9891141075741e-14
UBR5	-0.98394	9.69710266263259e-16
PIK3CA	-0.983773	4.27893526928675e-08
LOC122438089	-0.982993	7.7040069097129e-05
NET1	-0.982575	1.17939667956964e-09
LOC122454831	-0.98212	0.00233359
RLIM	-0.982102	4.24860141591184e-06
DNAJC13	-0.981493	5.72752657548382e-10
EMSY	-0.981252	5.67026127952731e-09
LRCH3	-0.979586	1.55081235254143e-08
SLC30A7	-0.979576	1.64187806766886e-05
LOC122451652	-0.97952	2.3976392463018e-11
ANLN	-0.97935	2.30321201986684e-05
TRIM59	-0.979124	0.00033416
CENPC	-0.978941	3.65749261831426e-05
DENND4A	-0.978867	3.4920165039411e-10
TLR8	-0.978666	1.69115798176608e-06
STT3B	-0.978488	1.61238741721311e-06
LOC122420698	-0.978146	0.0224039
PAK2	-0.978028	1.16006403967011e-06
GXYLT1	-0.977571	0.000247915
GPRIN3	-0.977379	1.99710448468381e-05
ZBTB21	-0.976795	1.20551033936489e-08
PRMT9	-0.976709	1.2271167823107e-11
ZNF281	-0.976406	3.28077033175663e-15
ATP8A1	-0.976157	2.63255873587031e-06
AHCTF1	-0.975534	7.14793934169057e-14
SEL1L	-0.975401	1.18843843908145e-11
ESR1	-0.975368	0.0103589
ZNF33B	-0.975059	0.000271293
SCAF11	-0.975029	3.22399377223512e-07
MBTPS2	-0.974601	8.89320192141205e-09
DNAI4	-0.974399	0.043894
EOGT	-0.974385	4.89940439843417e-05
LOC122428652	-0.974324	0.0468404
BNIP2	-0.974161	3.15932008981522e-07
SLC30A5	-0.973623	9.4485209709707e-07
WAPL	-0.973515	1.65898254107152e-07
DDHD1	-0.973349	3.66495033857556e-08
LOC122425174	-0.973288	3.60548395033813e-09
MAST4	-0.973268	7.72850480606278e-07
ACAD11	-0.97296	1.39463671310925e-05
SINHCAF	-0.972677	0.00252688
VPS13C	-0.971554	1.13020318990511e-07
C15H2orf88	-0.970937	0.00251673
HEATR5A	-0.970738	5.98368044297877e-11
YTHDF3	-0.970576	4.33793808662213e-07
HMCN1	-0.969934	0.00340561
HAUS3	-0.969454	0.000307974
PROKR1	-0.96929	5.32734396191106e-05
PTCH1	-0.969282	0.00321042
ZNF697	-0.96922	7.70968408315097e-05
EPC2	-0.968764	1.35759816806915e-07
TTC33	-0.968258	1.95129605470382e-05
ZFP14	-0.967966	0.000985702
CEP290	-0.967413	3.73124821279012e-05
ARID5B	-0.967376	1.91206507111508e-14
CHD1	-0.967302	1.97271418271245e-08
PPAT	-0.966939	6.3774181055276e-09
CD55	-0.966002	7.07508937719741e-08
TMTC3	-0.965598	0.00383964
ZFP62	-0.965562	8.37148759519037e-05
MBNL3	-0.96553	6.04184528659647e-06
FNDC3B	-0.96534	6.99895056483625e-10
RUNX1	-0.965181	8.88517489436849e-06
L2HGDH	-0.965065	0.00206545
AGO2	-0.964284	9.21619981947882e-12
CD164	-0.963418	5.23747869344919e-06
LOC122435272	-0.963395	0.0432436
PAXBP1	-0.962684	8.87512718641122e-09
MEX3C	-0.961858	9.23522480001124e-06
PLAGL1	-0.961109	6.99080843830967e-06
B3GNT5	-0.961105	9.60634752152788e-06
CLDN12	-0.960551	1.59303748364068e-06
LOC122434372	-0.960538	0.0195353
RIT1	-0.960401	8.80832745938685e-07
RAPH1	-0.960243	6.83097909262009e-06
STRN3	-0.95969	5.28916860933744e-08
MYEF2	-0.959513	9.32993157033738e-05
SPRED1	-0.95894	0.00402335
TET1	-0.958845	0.00063227
ZNF569	-0.958412	0.000866157
LOC122420554	-0.958225	1.05748221277203e-09
LOC122440921	-0.95794	0.0170799
ACVR2A	-0.957803	0.00415454
DLG1	-0.957704	5.4765811288464e-07
PPM1B	-0.957001	4.68210800719347e-08
UFL1	-0.956748	4.3862678095014e-06
MEF2A	-0.956243	8.66321968068804e-06
HECTD1	-0.956191	9.30797464836672e-10
CHRM3	-0.956135	0.00687294
FAM199X	-0.954868	0.00583579
SPAG9	-0.954577	2.47799970984138e-08
EXOC8	-0.954397	7.16955520276972e-06
NEK1	-0.953802	1.64798325419678e-05
PDE4D	-0.953732	0.000250441
BRWD3	-0.952355	9.00973230079275e-08
TRMT1L	-0.951982	9.72876147894032e-06
KDM7A	-0.951633	1.37398692928104e-12
TJP1	-0.951278	0.0050632
CHD9	-0.950868	7.09355298071717e-08
RBL2	-0.950805	1.01104463702402e-13
TMX4	-0.950543	0.0071173
ATF1	-0.950444	2.3968007525181e-08
TMEM87B	-0.95012	2.07964654010679e-08
VMA21	-0.949966	0.000514165
LOC122429986	-0.949422	0.0459322
G3BP2	-0.949212	2.79947847084806e-06
KIT	-0.948983	0.000336507
PALS1	-0.948657	4.29573742221264e-07
SLC30A4	-0.948556	4.12919797625291e-10
MARCHF1	-0.947207	6.986077291424e-06
KIF11	-0.947125	0.000350001
CASD1	-0.946896	0.00140073
DCK	-0.946813	1.86095480528499e-05
LOC122443337	-0.946811	0.0248514
DYRK1A	-0.946493	2.19853186470999e-08
KMT2A	-0.94578	2.11749970095548e-13
LOC122440485	-0.945717	0.020684
PRDM5	-0.945284	0.026509
TMEM135	-0.94471	6.48769828099414e-08
SLCO4C1	-0.943724	3.4811370868158e-05
ENAH	-0.943652	0.024224
COBLL1	-0.943596	0.00178546
APH1B	-0.943374	2.00724369303737e-09
LOC122443597	-0.942985	0.000264654
LOC122421665	-0.942763	0.00100836
ZC3H12C	-0.942709	7.33677777745465e-07
LOC122432993	-0.942466	0.0284532
SLF2	-0.942266	1.48461660372037e-08
KIF20B	-0.94179	0.00100836
LOC122421408	-0.941687	0.000360733
SLC44A1	-0.941666	9.30797464836672e-10
LOC122438219	-0.94123	0.0180484
ERCC6L2	-0.941144	4.59792100285219e-05
SPDYA	-0.940556	0.000467733
NCEH1	-0.940383	2.61277853263709e-05
CBLB	-0.940352	2.8494877255484e-07
EML4	-0.940208	4.08259178160255e-09
KLHL11	-0.9394	1.93778959672751e-07
SPC25	-0.939371	0.00597186
ARHGAP12	-0.939266	5.27837262967805e-09
GPR155	-0.938229	4.8513840710585e-05
RRN3	-0.938188	7.34020591647162e-09
BMI1	-0.937692	0.000141415
CNOT7	-0.936435	1.22155931306543e-05
ZNF217	-0.936296	1.01963535926099e-12
PHTF2	-0.936177	0.00552453
KIF27	-0.93592	3.3520990196102e-07
TRAPPC10	-0.935494	4.12373890153567e-13
ANGEL2	-0.93547	8.81124245561119e-06
INPP4B	-0.935466	3.88450024938117e-05
BLOC1S6	-0.935145	0.000136794
LIN54	-0.93491	3.76659817767939e-06
LOC122419795	-0.934616	0.0111842
RMND5A	-0.934139	5.88677510687026e-08
ALG13	-0.934032	1.55081235254143e-08
DPY19L1	-0.933185	5.24815513340347e-08
LOC122420619	-0.932773	0.004315
SLC35A5	-0.932234	1.69452780405248e-08
LOC122435830	-0.93209	7.18251346729522e-05
PLCL1	-0.9313	0.00128469
PTPDC1	-0.93121	0.002659
ZFR	-0.931158	3.10485455684037e-08
PPIL4	-0.93094	2.35528430828706e-07
RASA2	-0.93088	5.00125200074899e-08
LOC122451780	-0.930545	0.00956203
RAB11FIP2	-0.929991	4.86409230603235e-06
C4H5orf15	-0.929273	3.619908559228e-07
THUMPD1	-0.928005	9.68749062749846e-06
LOC122431502	-0.927781	0.0465757
LOC122424660	-0.927748	0.00700135
LOC122439866	-0.927734	0.00886377
ZNF148	-0.927683	1.31857869036007e-05
CGGBP1	-0.927105	9.55832149433143e-07
MFN1	-0.926693	6.66616145160127e-07
RAP2A	-0.926576	0.00868243
EGFR	-0.926504	0.00131082
LOC122449683	-0.926031	5.78284675489436e-05
B3GNT2	-0.925946	7.66594474703633e-05
LOC122433093	-0.925653	2.26020410138713e-06
EIF4E	-0.925626	0.000961794
TCP11L2	-0.925424	6.76077817460942e-11
LOC122428002	-0.925317	0.0466055
LOC122421201	-0.9249	0.000135594
REV3L	-0.9249	1.07873567303388e-09
USF3	-0.924229	3.61813930716033e-07
ERCC4	-0.924216	4.20036323839804e-06
C28H6orf62	-0.923549	2.7771617651193e-12
TAB2	-0.923143	4.84509099661434e-10
DHX15	-0.923054	6.62501130860195e-08
LOC122435018	-0.92277	0.0307721
PBLD	-0.922221	0.00445184
ANKIB1	-0.921005	1.04925318616005e-06
TMTC2	-0.92098	0.000112781
ZNF236	-0.920771	1.07873567303388e-09
RBM26	-0.919967	1.92459328371408e-07
PBRM1	-0.919634	4.9140464104742e-06
EBF1	-0.918489	3.53205736109151e-05
LOC122438262	-0.918347	2.66676910297753e-05
NDC1	-0.918289	0.000193804
ARHGAP28	-0.91821	0.00926794
SLC9B2	-0.918031	0.0001391
DAAM1	-0.917661	1.1366120769253e-06
LOC122440602	-0.917522	0.00137787
BTBD3	-0.917377	0.000156742
LOC122432109	-0.917214	0.00439331
LOC122434951	-0.916929	0.0377141
DDI2	-0.916903	2.80372054766e-08
HIF1A	-0.916806	6.14118783682016e-06
KLHL7	-0.916601	6.98062710378179e-06
ATP6V1A	-0.91627	1.87205615512367e-09
LRRCC1	-0.916254	0.00235678
HNRNPLL	-0.915995	3.75385750525214e-11
C27H3orf38	-0.915867	1.73727190489197e-08
REEP3	-0.91586	0.00149311
MTMR6	-0.915793	1.12866230682254e-08
PLCE1	-0.915366	0.0300896
ZNF599	-0.914869	0.000122998
PJA2	-0.914865	1.9742853766034e-06
HEG1	-0.91393	3.3312149804836e-05
TMEM67	-0.913512	0.0086746
PTPN4	-0.913357	0.00299616
LOC122452576	-0.912883	2.82468132314365e-07
SREK1IP1	-0.91281	1.48894117303462e-05
MPP7	-0.912742	5.25019721945618e-06
CPED1	-0.91265	0.0001262
TRAPPC13	-0.91241	2.42174801097426e-05
VPS54	-0.912306	1.28448767208643e-05
LOC122435300	-0.912232	1.12286040479771e-09
BZW1	-0.912224	0.000430087
AGPS	-0.911886	2.50167007374661e-07
ZNF25	-0.911374	0.000549699
PAWR	-0.910845	0.00179289
LARP4	-0.910501	2.80334931737492e-06
CYLD	-0.910113	8.30230585884328e-10
DIRAS2	-0.909889	0.0171394
TAF1	-0.909864	2.72588593918339e-09
PABIR2	-0.909156	8.27842818775043e-07
FRYL	-0.908791	2.98605763769078e-11
NFAT5	-0.908572	2.04028778575854e-11
LOC122440621	-0.907969	3.1560268664014e-05
FBXO28	-0.90785	1.50658731884226e-06
SEC24B	-0.90785	1.96725112952863e-09
C32H16orf72	-0.907317	7.9098949708786e-11
LOC122434864	-0.906569	0.00710024
SBNO1	-0.906099	1.04901083773699e-08
AZIN1	-0.906056	9.3386240742203e-07
XRCC4	-0.905739	0.000830155
LOC122429732	-0.905554	0.00141462
SLC36A4	-0.90438	4.79632324077838e-05
LOC122451337	-0.904168	0.000443286
CDK6	-0.902823	7.02769941120197e-08
PLEKHA8	-0.902761	9.30213682121326e-07
LOC122448186	-0.902504	1.4139238821626e-05
CCAR1	-0.902207	1.96743418376395e-05
KBTBD7	-0.901786	4.3962983007681e-05
KAZN	-0.901754	0.0281275
TRAF5	-0.901491	1.65094969565728e-06
FAM76B	-0.901323	0.000502815
SCML4	-0.901207	1.13167217270091e-06
MDFIC	-0.900979	7.0436869441399e-06
ATF2	-0.900884	4.2941794108803e-07
SAV1	-0.900559	1.39521332095077e-05
TTPAL	-0.900488	4.31449403921331e-05
ROCK1	-0.900053	7.7265816441694e-05
DOCK9	-0.898494	8.06835392405128e-09
FAM200B	-0.89845	1.66216792124998e-06
RNPC3	-0.898428	3.2028608993209e-09
DPY19L4	-0.898202	2.46490211400744e-05
ACSS3	-0.898013	3.27642547508871e-11
NUP42	-0.897954	0.000775923
LRRC8C	-0.897938	7.04433930947218e-08
WDR43	-0.897729	2.00366822761805e-05
CARF	-0.897567	3.76659817767939e-06
SLC35F5	-0.897198	0.00743385
TRIP11	-0.897048	1.02861850299119e-06
RAD21	-0.89701	6.77901707825822e-06
FAM172A	-0.896985	5.15847822616163e-07
WRN	-0.896271	1.8831738996365e-05
USP6NL	-0.896111	3.48140730060185e-06
KLF9	-0.895575	0.000190184
C2CD5	-0.895139	1.81653258785226e-06
LRPPRC	-0.894239	4.31104088658271e-06
DENND6A	-0.894158	1.64565531821271e-05
ZNF131	-0.893863	2.24508907904476e-05
GALNT1	-0.893391	1.40594639593211e-05
LOC122440449	-0.893043	0.0143499
EIF4A2	-0.892955	4.08124201739098e-06
CLINT1	-0.892934	3.48197114691819e-06
CDKL5	-0.892356	0.000422651
KCTD12	-0.892337	2.37364668839827e-06
DYRK3	-0.892037	0.00249745
ATE1	-0.891383	0.00010322
NUP160	-0.891132	5.2438926032355e-09
PPM1E	-0.89091	0.0279923
KLHL14	-0.8909	0.00857409
NEK7	-0.890182	4.06344725376777e-09
ARL6IP6	-0.890042	6.76404909638637e-07
ZNF572	-0.890038	3.35604257999321e-07
LOC122422296	-0.889912	0.00146782
CD109	-0.889111	0.0133335
SCAMP1	-0.88886	0.00749888
LOC122420718	-0.888772	3.56265161124325e-12
SLC10A7	-0.8872	1.49600320833001e-05
TOR1AIP1	-0.887015	8.1631970881245e-10
GALNT3	-0.885848	0.00487473
LOC122424389	-0.885641	0.0275224
ADAM9	-0.885469	4.07184120032051e-05
RP2	-0.885294	2.68377290230298e-07
RCOR1	-0.884574	3.64771803261896e-13
ITPR2	-0.883989	3.72188393149149e-06
LOC122427476	-0.883874	0.018882
EP300	-0.883688	5.2533139321962e-15
LOC122450593	-0.883612	0.0392349
RANBP2	-0.88361	1.96026181318224e-09
GJA9	-0.88331	0.0417546
ATL3	-0.883244	0.000143128
AEBP2	-0.882682	0.00041914
SNRK	-0.881849	1.1883706632226e-15
ACBD5	-0.881839	2.61236983523022e-07
ZNF608	-0.881609	0.000339838
EEA1	-0.881599	0.000125485
SAMD4A	-0.881377	0.00163061
ADSS2	-0.881273	4.25594024969596e-10
LOC122428782	-0.881119	0.000200816
KIF5B	-0.881113	2.77741094705969e-06
GTPBP8	-0.880839	0.00151301
QKI	-0.880602	1.36351456943771e-08
ZFAND4	-0.880173	0.00195297
IPCEF1	-0.879681	5.27415936617066e-12
APPBP2	-0.879497	4.27012389993719e-10
ENTPD7	-0.879214	4.13372453917948e-10
LOC122449459	-0.878873	0.000696763
RBM39	-0.878816	9.59163485904017e-08
CCP110	-0.877148	0.000624729
SLC39A10	-0.876904	8.71597801379957e-07
FKBP5	-0.87633	9.62047606360088e-05
CBFB	-0.876166	0.000462919
MGA	-0.87612	1.59458397543463e-07
NAV2	-0.875941	0.0295591
KMT2C	-0.8754	3.49226981565331e-12
ZFC3H1	-0.874865	9.05049134004088e-13
GCFC2	-0.874565	2.31651087214733e-05
PSME4	-0.874289	2.09364082673421e-10
MLLT10	-0.874275	2.10693727320259e-08
PRKAA1	-0.874172	7.91277415961421e-06
LOC122425429	-0.874031	7.8055681070324e-05
FREM1	-0.873272	0.0330934
ZEB2	-0.873259	2.88570937685269e-05
DNAH3	-0.873011	0.0053453
DOP1A	-0.872555	4.59858833603805e-11
USP37	-0.872521	8.24301260164277e-07
OPA1	-0.872431	7.07373402124669e-08
GOLT1B	-0.87216	0.000212771
MPZL3	-0.871558	2.28393223915213e-06
DPP8	-0.871431	1.92870968820455e-12
SLC51A	-0.871325	0.032303
PAG1	-0.871226	1.60952999775738e-05
THAP12	-0.871093	0.000353775
ASB3	-0.871006	6.19471741383929e-07
LPCAT2	-0.870687	1.33814215136482e-08
COG6	-0.869218	5.21409017088093e-05
KLF6	-0.868445	3.26538827342347e-10
LOC122445522	-0.868413	0.000590282
WDHD1	-0.86834	0.000115815
SCRN3	-0.867529	0.000146567
TLK1	-0.867383	1.85350169389172e-05
LOC122427080	-0.866834	0.000157001
GOLGA4	-0.866703	3.91116842705717e-05
GATAD1	-0.866324	0.00122539
SPAST	-0.865864	1.88669795698076e-05
ERI1	-0.865847	0.00281959
TCAF1	-0.86564	1.82291437101607e-05
CCNT2	-0.865363	1.15513874688442e-06
NOCT	-0.86525	0.00012847
LOC122445845	-0.864848	1.53633836133683e-05
ZBTB34	-0.864635	6.11375552260538e-09
ARMC1	-0.864502	9.22678590363808e-05
LIN9	-0.864461	0.000562458
FCRL3	-0.864289	0.00117799
DUSP19	-0.864116	0.00093113
ECT2	-0.864105	0.000997662
CAND1	-0.863641	2.17956690251051e-06
NEDD4	-0.863578	0.00123161
MRE11	-0.863486	0.000153574
GAN	-0.863431	2.95054248027992e-13
LOC122448174	-0.86244	0.000268254
FAM120C	-0.862345	5.45460443892029e-14
CDC14B	-0.862144	5.05568211316631e-09
TAX1BP1	-0.861667	0.000199054
DENND2C	-0.861589	0.0409879
EHBP1	-0.861497	4.93611467016796e-05
DLC1	-0.861411	0.000867181
OGT	-0.861278	1.47760538963157e-13
KCNA3	-0.861105	0.000997449
LOC122420477	-0.860851	0.0199501
SLC25A46	-0.860659	0.00236143
LRRC8B	-0.860653	6.25044151587323e-08
ADAMTS6	-0.860603	0.0278245
NUS1	-0.860535	1.3617653830252e-05
PAIP2	-0.86017	0.00152527
C16H5orf51	-0.859307	3.46744787259083e-07
ADGRG6	-0.858956	9.24993983951808e-06
ZFP57	-0.858649	0.0247039
NT5C3A	-0.858212	3.31442435695064e-05
ZNF292	-0.858046	1.38674499144277e-07
NAA16	-0.857886	8.98458678460884e-09
ATP8B4	-0.857872	0.00360625
ATP6V0A2	-0.857454	1.02563790730176e-11
PURB	-0.856936	1.00754549787523e-05
SLC25A27	-0.856722	4.74091722207628e-06
ATP8B1	-0.856424	0.00685881
CPSF2	-0.856192	1.76365494778283e-05
DGKH	-0.856081	0.0178113
LRBA	-0.856055	8.60575988125793e-07
STXBP5	-0.855719	1.70632151937953e-06
NADK2	-0.855077	0.0079347
RNF217	-0.854836	4.06810116923358e-05
XPR1	-0.854306	7.41750935114004e-06
ACSL3	-0.85423	1.12416116182577e-07
CUL4B	-0.8542	8.58846025737332e-06
RUFY2	-0.853443	0.000231547
HNMT	-0.852881	0.00123724
LOC122436399	-0.852158	0.000158478
MAPK8	-0.852056	6.34113326467488e-06
LOC122424529	-0.850945	2.63255873587031e-06
TPD52	-0.849389	0.000966598
LOC122423405	-0.849211	0.0384795
ZNF10	-0.849144	0.000412444
NCKAP1	-0.848479	0.00255892
ANKRD50	-0.847893	0.00011332
CSNK1A1	-0.847627	5.76212270033543e-08
PTBP3	-0.847554	3.56145505327493e-05
SCLT1	-0.847378	0.000227619
RAD54B	-0.84718	1.43246516086507e-05
KIN	-0.847038	3.48531265767077e-06
RALGAPB	-0.846832	1.0578564543874e-12
GRAMD1C	-0.846358	6.74808256830943e-05
ATXN7	-0.84618	7.00862433852422e-11
MON2	-0.845845	5.29358892214812e-10
ZNF638	-0.845794	3.18907241492e-07
TENT4B	-0.845496	3.44832328142575e-06
USP12	-0.845487	6.51715824554926e-05
DNAJC10	-0.845376	0.000851057
LOC122435265	-0.843701	0.000558609
LRP6	-0.843665	1.46179028231415e-05
CLIP4	-0.843585	4.07184120032051e-05
ATP2B1	-0.843516	1.84159175194857e-07
TMEM170B	-0.842777	0.0111026
SFT2D2	-0.842273	2.4005392388547e-06
IBTK	-0.841577	0.000159566
NHLRC2	-0.841528	1.08526383927545e-06
DOCK8	-0.841136	1.36955213477457e-10
BTBD7	-0.840844	3.10485455684037e-08
PDE1C	-0.840496	0.0291496
SGO2	-0.839915	0.000547603
LOC122451757	-0.839883	0.00459956
CHM	-0.839822	0.000159871
XPOT	-0.839729	1.7550783714892e-06
ANKRD28	-0.839269	5.12926506122234e-08
PPM1A	-0.838917	1.64057372906956e-06
EIF5	-0.83841	9.23490966756121e-06
STON2	-0.838364	0.0012319
OPN3	-0.838163	0.00144891
ZDHHC23	-0.837815	5.99502985826265e-12
BRAF	-0.837477	2.46865281174129e-11
BAZ1A	-0.837339	1.09727000828863e-06
GNA13	-0.83715	9.27722915146957e-07
RPS6KA3	-0.836786	2.81062834814862e-06
PTPN11	-0.836464	2.50858336247573e-06
DAPP1	-0.836451	2.94276931264781e-09
SKAP2	-0.836292	1.1880874129602e-06
LOC122453904	-0.836179	0.00112214
KAT6B	-0.836166	1.27547571884194e-10
ERCC6L	-0.835848	0.00634997
KBTBD2	-0.835737	7.92282756706393e-07
GBE1	-0.835473	4.67249946228119e-07
SLC33A1	-0.834924	5.87954130065109e-06
SERINC1	-0.834591	6.66648753866389e-06
CDC73	-0.834382	8.799111817757e-08
AP1S3	-0.834205	0.000558375
CPD	-0.833993	6.60891874341331e-08
TMEM19	-0.833363	2.26679136234309e-06
PRSS12	-0.83325	0.0408292
MSH3	-0.832935	1.85350169389172e-05
ZNF24	-0.832809	1.20118255899742e-06
RNFT1	-0.832003	6.87841906172009e-06
ARFIP1	-0.831956	1.43630364290319e-06
TMPO	-0.831915	0.000207315
USP46	-0.831829	0.000530997
LOC122455298	-0.8318	0.00177617
C17H14orf28	-0.831423	0.0106225
MACIR	-0.831357	0.000115815
CLEC17A	-0.831202	0.00446549
CERS6	-0.830676	1.22155931306543e-05
PDCD10	-0.830638	0.00183043
NUP153	-0.830625	1.18233980973459e-14
PRKD3	-0.830428	3.88387292997052e-06
LOC122451004	-0.830199	0.022156
NAA25	-0.830073	7.60415262981548e-10
SNX14	-0.829992	5.0043354338744e-06
LRRC70	-0.829868	0.0490836
LOC122433063	-0.829847	1.23661194091423e-14
PUM1	-0.829607	9.01840074095222e-08
ORC4	-0.829522	0.000926855
EML5	-0.829494	3.31706116808448e-08
RNGTT	-0.829439	1.37217482102724e-05
LOC122425584	-0.829114	9.17952770499509e-08
SLC23A2	-0.828813	7.48383830834185e-16
TMED8	-0.828462	3.33454432939805e-14
MOSPD2	-0.827782	0.00407284
TANC1	-0.827653	0.0109164
CHIC1	-0.827614	0.000301899
ASH1L	-0.826578	6.2217552042377e-11
ERI2	-0.826239	0.000931131
IQGAP1	-0.826176	6.67082529192391e-07
MAN1A2	-0.82617	1.07579368376048e-10
RNF138	-0.825925	0.00617564
VPS26A	-0.825336	0.000120631
TRA2A	-0.82529	7.29584336199622e-06
LOC122433004	-0.825278	0.00136246
TM7SF3	-0.825102	0.000188883
SEC63	-0.8249	1.02860202494026e-05
CTNNAL1	-0.824759	0.0204702
CIP2A	-0.824259	0.000511023
METTL8	-0.824256	0.000905475
NXT2	-0.824142	0.0228001
GALC	-0.823858	3.2460049252027e-05
CCND2	-0.823194	9.66389359645186e-06
KANK1	-0.823112	0.00323322
PCMTD2	-0.821699	9.64962581896071e-08
LCOR	-0.821518	1.96725112952863e-09
LOC122440466	-0.821451	0.000170676
MC5R	-0.821402	0.000258102
CTSK	-0.82129	4.20036323839804e-06
LOC122438080	-0.821003	2.9945672192896e-07
SMC6	-0.820368	0.000360751
NAMPT	-0.819494	0.00034159
LIN7C	-0.818256	0.00856999
SLC40A1	-0.817792	1.2218509656432e-05
ERMP1	-0.81749	2.73742192938617e-12
SLC38A1	-0.817343	1.4448752547142e-05
INTS6	-0.817194	1.01523249227474e-06
PAPSS2	-0.817179	2.88357731970244e-08
UBL3	-0.816297	4.20914852393338e-05
PPP6R3	-0.81567	1.20656870790872e-08
PIK3C3	-0.815637	1.40601832305269e-06
LOC122420598	-0.815553	7.88494643842718e-06
PPP2R1B	-0.81552	7.09355298071717e-08
PUS7	-0.815483	6.70053998922414e-06
PRKAB2	-0.815193	4.6622061729791e-05
ACSL4	-0.814773	3.04195518666366e-06
NUP58	-0.814726	1.50373439718846e-06
GNE	-0.814572	2.89401790265163e-09
RNF38	-0.814267	1.04820913781808e-05
ZEB1	-0.813889	3.65163710448699e-08
ITPRID2	-0.813627	7.50182347599531e-05
ISCA2	-0.813602	0.00155742
CEP192	-0.813146	1.71049765315252e-09
LOC122438227	-0.812875	0.0122923
RBM47	-0.81248	4.9788104577192e-07
CDS1	-0.812397	0.00704089
RNF11	-0.811832	0.000389655
DOCK7	-0.811676	0.000356896
ZNF445	-0.811633	1.20920224369521e-08
PPP2R5E	-0.811584	1.11097270099048e-05
TBK1	-0.811532	1.82204176371921e-05
DPYSL2	-0.81147	2.34852932845184e-06
QTRT2	-0.811229	8.95913131665582e-07
TMEM170A	-0.810749	0.000458628
ZNF451	-0.810453	2.28631945614086e-09
SAMD8	-0.810241	7.26624662045481e-05
SNX10	-0.810104	0.0259383
CASK	-0.809961	7.9612007061223e-05
LOC122422030	-0.809859	0.00267183
ZMYM6	-0.809184	4.66971919131446e-11
SETX	-0.808982	2.85637944530462e-09
GNAQ	-0.808896	0.00377067
DIAPH2	-0.808363	9.43026141534364e-06
SLC9A6	-0.808299	2.6213004521347e-05
PPARGC1B	-0.808271	3.44976962939865e-09
UGDH	-0.808115	1.04294494330961e-06
LOC122446324	-0.808111	0.0166698
SLC41A2	-0.80795	0.0292341
HECA	-0.807533	6.9894659708975e-06
NRAS	-0.807374	0.000242282
MTMR9	-0.807221	1.13568436896082e-06
PELI1	-0.807133	0.000277701
SWT1	-0.806976	8.19227552133507e-09
IL18	-0.806974	0.000129368
AASDH	-0.806503	1.26590653600364e-06
HSF2	-0.806419	0.000150697
STAG1	-0.80528	5.11989217062236e-07
AFF3	-0.805085	1.9549466080097e-06
ABCD3	-0.804581	0.0036243
MTF2	-0.804452	7.64119597684451e-06
RPGRIP1L	-0.804351	0.0168289
BIRC6	-0.803887	7.14793934169057e-14
SLC14A1	-0.80365	0.0195899
CBLL1	-0.803491	1.17890902998071e-05
MMD	-0.803431	4.76866179215969e-05
CHSY1	-0.80319	4.06242936692185e-10
LOC122420762	-0.803166	0.00393233
WEE1	-0.803051	0.000294904
E2F3	-0.803031	4.24006868204987e-05
CCDC18	-0.802991	0.000414106
GTF2E1	-0.802911	1.64021629559338e-05
FAM216A	-0.802795	0.0116009
CACNB2	-0.80248	0.0477426
ARHGAP29	-0.801982	0.0288775
NAA50	-0.801562	0.000260155
NUDCD1	-0.800972	0.000282018
NUDT9	-0.800547	3.54199532151691e-08
DESI2	-0.800533	0.000171265
DIXDC1	-0.800377	2.31559996419724e-07
BBIP1	-0.800363	0.000499773
RALGPS2	-0.80018	0.00286193
ARL6	-0.800148	0.0429165
GPBP1	-0.800051	4.86464201620081e-05
CANX	-0.799785	1.53324989178669e-06
SOCS6	-0.799502	0.000476333
IPO7	-0.799446	0.000207296
HELQ	-0.799418	5.41988080293723e-10
BCLAF3	-0.799343	6.986077291424e-06
TTC21B	-0.799324	9.55707762307225e-09
C9orf72	-0.799032	0.0163277
PHF20	-0.798957	1.45226311131959e-07
IPO8	-0.798808	1.35537094099037e-05
SETD7	-0.798774	2.51033095243018e-06
LOC122453173	-0.798697	0.0108071
LOC122435840	-0.79843	5.59972600971415e-10
NUDT4	-0.797799	3.57382381456983e-05
PGM2	-0.797502	0.0011463
MASP2	-0.797052	6.42568278968654e-08
LOC122436505	-0.796818	4.08124201739098e-06
TRMT10A	-0.796243	0.00247295
VPS50	-0.796014	6.14065950513972e-07
DDIAS	-0.795793	8.29873363414213e-05
ARHGEF26	-0.795159	0.00293543
SLC12A6	-0.79511	1.34597422917671e-11
GMCL1	-0.794906	0.000286438
MAGT1	-0.794903	0.00563746
ABCA1	-0.794903	0.00141984
DZIP3	-0.794681	1.92459328371408e-07
CCDC66	-0.794473	5.1844429809981e-09
PTPN13	-0.794413	0.00113072
TCF7L2	-0.794386	9.35683691332313e-07
ZMPSTE24	-0.794056	0.000405945
ARFGEF1	-0.793755	4.66971919131446e-11
PRKACB	-0.793738	0.00146132
TUT4	-0.793736	4.31333149753358e-08
GNPDA2	-0.793712	0.00140927
NAA30	-0.793638	0.00152363
MET	-0.793636	0.0175697
KCNMB3	-0.792749	0.0067877
PAPOLA	-0.792685	2.44113284922055e-06
RFK	-0.792372	0.00215401
LOC122444987	-0.792151	9.8716450159402e-07
LOC122446583	-0.792124	0.00169053
NEDD1	-0.791948	0.000111471
CNOT6L	-0.79192	6.43893268663397e-05
CDK19	-0.791874	2.97256762116621e-05
KLHL2	-0.791748	1.0796205758038e-07
PRRC1	-0.791219	0.000151248
AKAP5	-0.791164	0.000258421
RORA	-0.791077	0.00315138
ZSCAN30	-0.790435	0.000318037
SRSF10	-0.789991	1.80047720377812e-05
ZMYM4	-0.789795	0.00014352
AKT3	-0.789515	1.90063344318423e-05
ZBTB43	-0.789505	7.89794943680009e-05
SON	-0.789452	5.68103367954157e-10
P4HA1	-0.789189	3.06121050363332e-08
GUF1	-0.787964	1.25049696010211e-05
LOC122450097	-0.787661	0.0104499
GNAT2	-0.78704	0.0258777
SLC25A40	-0.786973	0.000324551
CD46	-0.786894	2.82915835916595e-09
WDR26	-0.786754	4.89750889349851e-10
NAA15	-0.786693	0.000305782
CEP41	-0.786511	1.28708631650667e-06
TMED10	-0.786347	3.88387292997052e-06
LIPM	-0.786158	9.75450347366877e-06
FER	-0.785974	0.000185301
INO80D	-0.785794	3.66495033857556e-08
CGAS	-0.78537	0.0139789
ARMCX3	-0.785025	1.07117764507001e-07
ZFP82	-0.785024	7.17977311344979e-05
ITPRIPL2	-0.784984	3.39595252835048e-05
ZNF354A	-0.784675	5.00561647293191e-08
PDPK1	-0.784675	5.80844523149886e-14
IFIH1	-0.783927	6.75654394654588e-07
LOC122421319	-0.783478	4.18258105546046e-05
LOC122441872	-0.783439	0.00225019
BRIP1	-0.783175	0.0074777
FCRL4	-0.783154	0.0377607
BCLAF1	-0.782988	1.40501592608209e-05
KLF7	-0.782972	3.30834189695379e-09
RELCH	-0.78263	3.53193717744755e-09
SERPINE3	-0.782482	0.0147767
SPPL2A	-0.782264	0.00119423
ITPR1	-0.782236	1.5350191336055e-07
CREB5	-0.782216	0.000214575
RAB6A	-0.782012	0.000227619
ATP2C1	-0.782003	4.67762081400554e-06
ABL2	-0.781991	1.94141021046672e-08
SLC9A7	-0.781698	1.17130003359695e-05
PRPF40A	-0.779927	0.000233272
AMMECR1	-0.779631	4.55944156037113e-08
SEH1L	-0.779551	0.000650856
RAB39A	-0.779513	0.0178411
COQ10B	-0.779227	0.00027799
RAP2C	-0.778794	0.000219253
TMEM50B	-0.778194	0.000675862
GOSR1	-0.777504	1.60882994471085e-06
RAB3GAP2	-0.777434	4.99734232335339e-08
LOC122452816	-0.777216	0.00046411
AGBL3	-0.776989	0.0102074
MIS18BP1	-0.776327	0.0289071
B3GALT5	-0.776251	9.44881488738913e-06
RASGRP1	-0.776213	5.15618065393108e-05
HLF	-0.77616	0.00314814
PLAC8L1	-0.775715	6.30324644933618e-05
IQGAP2	-0.774798	1.3969066355378e-05
FKTN	-0.774768	9.98427623444328e-08
CDIN1	-0.774562	0.00913981
ERRFI1	-0.773832	1.34388467953586e-07
WSB1	-0.773771	1.91579202706863e-07
KDM6A	-0.773759	1.00592837580598e-13
RLF	-0.773739	9.31052674074458e-07
PTGER4	-0.773617	4.39645736573754e-07
PLEKHM3	-0.773543	8.95913131665582e-07
IFT74	-0.772722	0.0194353
ITSN2	-0.772628	1.50149648675831e-08
STK38L	-0.772363	1.92470746225038e-07
MOB1B	-0.772226	0.000802553
TIA1	-0.772034	4.38514969233818e-07
EPS15	-0.771789	1.77724289700129e-06
LOC122424785	-0.771773	0.000501677
PSMC6	-0.771661	0.00135817
LOC122420470	-0.771449	0.00863676
TANK	-0.771306	9.93363104945628e-07
TMEM68	-0.771303	0.00070654
EXD2	-0.771301	9.39770617742667e-08
ETS1	-0.771256	0.000218833
MAP3K7	-0.771225	2.80050611119222e-05
EIF4G2	-0.770272	5.36331637780149e-10
PTP4A1	-0.77021	0.000200817
CLTC	-0.769644	1.05838167805074e-07
NAPEPLD	-0.769634	0.000806678
UGGT1	-0.76918	1.70688892376419e-07
KIF2A	-0.768824	6.91617940395761e-05
SLC35D1	-0.768442	1.76509388130536e-08
NBEA	-0.768233	7.02445665903226e-05
AFF1	-0.768012	4.49901227784464e-16
ZDHHC15	-0.767599	0.0036777
ATL2	-0.767561	0.000134474
ATAD5	-0.767539	0.000858205
CC2D2B	-0.767388	0.00122626
SATB1	-0.767297	5.00742141962172e-05
LIMS1	-0.766621	5.37252954542096e-06
STEAP4	-0.766389	0.000110857
SLC24A5	-0.766146	0.0393943
P2RY1	-0.766015	0.000195552
RAPGEF5	-0.766004	0.000346887
GPAM	-0.76566	0.000285106
C1D	-0.765446	0.00681065
SMIM14	-0.765121	0.00339411
UBE2W	-0.765115	0.000246742
ZBTB25	-0.764904	6.77901707825822e-06
CDON	-0.764834	6.41499962950964e-05
SYTL2	-0.764444	2.32934384345311e-05
SPTLC1	-0.764294	6.15350641689011e-06
CHEK1	-0.764127	7.73999129228046e-05
XYLT1	-0.763981	2.58865721704671e-07
ZBTB3	-0.763468	0.00238068
ZFP37	-0.763348	0.0300896
LOC122420667	-0.763133	2.29833470927584e-07
KLHL5	-0.762297	1.164895975379e-06
NDFIP2	-0.762229	0.000970556
TOPBP1	-0.762083	1.41107329243376e-05
ZNF26	-0.76184	0.00365824
DIS3	-0.761771	1.70801971935502e-05
NUP133	-0.761621	7.3442259054385e-07
ACBD3	-0.760869	6.97342443196728e-05
EPM2AIP1	-0.760775	9.4116453072936e-12
HECW1	-0.760701	0.0172028
RBM15	-0.760219	3.12813577880527e-10
SNX4	-0.760153	0.0033444
LOC122449830	-0.759914	0.0273185
ITGA4	-0.759843	7.88494643842718e-06
RUNX1T1	-0.759723	0.00833517
FAM117B	-0.759545	0.000888463
UBXN7	-0.75934	2.14637973816292e-06
NFYA	-0.759282	1.83131744225113e-05
LMAN1	-0.758537	9.01681220789275e-06
LOC122451758	-0.758431	0.000230007
ATPSCKMT	-0.757987	0.000688597
LOC122424239	-0.75782	0.000114703
PNPLA8	-0.75782	0.000188739
SS18	-0.757321	2.18606931152766e-05
LOC122427867	-0.756825	0.0291951
IRAK3	-0.756574	0.000121879
HEATR5B	-0.75639	5.07155918039706e-10
GNPTAB	-0.755614	2.53321616411027e-11
RNF145	-0.755587	6.24077790267175e-06
ORMDL1	-0.754777	0.0137493
LOC122430623	-0.754761	0.0100461
ENC1	-0.754654	0.0079347
FEM1C	-0.75406	6.38382413507638e-06
LOC122438271	-0.753735	2.60285904782333e-06
PALS2	-0.753697	8.49526454297949e-05
DENND4C	-0.753672	1.59104368220287e-05
RDX	-0.753669	0.0344574
CENPI	-0.753603	0.000637239
ATRX	-0.753518	0.00354902
PDCD4	-0.753368	1.93909719799968e-05
PLXNC1	-0.753069	7.86402486066908e-08
LPIN1	-0.753041	4.79351820361171e-05
AP1AR	-0.752975	0.00258112
PTPN12	-0.752365	3.89076823981461e-07
CACUL1	-0.751781	1.18632693344662e-06
METTL25	-0.751567	0.00673234
LOC122448504	-0.7515	2.4705733146252e-08
ANKRD12	-0.751338	0.000817171
SLC25A30	-0.750856	6.79620276276028e-05
PIK3R1	-0.750309	4.78617213133696e-05
ZNF667	-0.750071	0.0091935
UBQLN1	-0.749832	3.27550701283877e-06
P2RX7	-0.749341	1.22768916237985e-05
ZNF782	-0.748535	0.0251203
LOC122445271	-0.748511	0.00106253
RIOK3	-0.748266	0.000257229
THAP5	-0.748205	0.000350973
KMO	-0.748181	0.00473696
ANKRD13C	-0.748073	0.000401968
DCP2	-0.747893	4.36217451281995e-07
NFYB	-0.747888	0.00056336
ANKRD6	-0.747871	0.0209873
FAM214A	-0.747808	5.86774795143472e-07
CEPT1	-0.747778	2.97256762116621e-05
RASAL2	-0.747694	2.09950036521388e-07
KNL1	-0.747615	0.00491992
GOLPH3	-0.74703	8.0769312066989e-05
FUBP1	-0.746835	5.27450370226853e-06
MEF2C	-0.746364	0.000304096
TRDMT1	-0.745978	0.0258463
ZC3HAV1	-0.745743	7.21026881375143e-06
SMAD4	-0.745272	3.92724535341634e-06
RABGAP1L	-0.744401	6.33360825431025e-07
RBM12B	-0.744131	1.12289886669748e-06
RHOT1	-0.744111	0.000133435
BTBD1	-0.74411	1.00990111454875e-05
ZNF70	-0.744067	0.000754855
CFAP54	-0.743134	0.000113308
HECW2	-0.743033	2.65265571609953e-05
LOC122447053	-0.742291	0.00144157
MXD1	-0.742172	4.24151295904532e-07
C3AR1	-0.742145	0.00511626
TTC37	-0.742065	1.2248743548868e-07
LOC122421602	-0.741638	0.0269895
LOC122420721	-0.741515	0.00191114
UBE2Q2	-0.741245	4.30465994454276e-06
MAP2	-0.741243	0.0249066
ERO1B	-0.74054	5.372075777192e-08
RASGEF1B	-0.74039	2.48013883298585e-08
API5	-0.740224	2.92022942716524e-05
RAB21	-0.739762	0.000126796
FOXO3	-0.73952	9.74522304603805e-10
CEP162	-0.739511	3.4021510748331e-05
SLC27A2	-0.739365	0.00041523
PCYOX1	-0.739305	8.63407974735233e-07
PGGT1B	-0.739265	0.000178823
SOX4	-0.73921	0.026509
GOLM2	-0.739122	0.00917422
RAP1B	-0.739002	0.000931131
SLC25A51	-0.738988	1.12289886669748e-06
KIDINS220	-0.738948	2.92236763083928e-09
LOC122429250	-0.738851	0.00562052
LOC122432320	-0.738798	2.95536112591402e-05
CPOX	-0.73865	0.00067111
CEP68	-0.738488	4.66699149315608e-07
LOC122439506	-0.738396	4.8421847144192e-06
LOC122430021	-0.738369	0.00241839
MCL1	-0.738345	2.15231945213876e-08
TM9SF2	-0.738311	3.04838448395046e-08
ATP1B1	-0.738193	0.00344284
DNA2	-0.738179	0.00839559
FCHSD2	-0.738063	1.37374021078063e-05
FZD3	-0.737481	0.00080042
LOC122442795	-0.7374	0.00664653
CDC7	-0.737185	0.00130516
PDCL	-0.737026	9.20614750519219e-06
HMGCR	-0.736725	8.54742140395425e-08
LOC122422768	-0.736604	4.06810116923358e-05
USO1	-0.736507	6.6534317826845e-06
AP5M1	-0.736262	7.25602367080952e-05
KMT2E	-0.735566	2.06107330354186e-09
THEMIS	-0.735544	0.00599377
LOC122443420	-0.73554	0.00275411
SERPINI1	-0.735289	0.00551022
HERPUD2	-0.734995	4.51405028947474e-08
TSPAN2	-0.734504	0.000396195
LOC122440460	-0.73448	4.2224407341662e-05
GTF3C4	-0.734234	8.61474318724347e-06
CCNYL1	-0.734017	1.37631860930886e-08
TMEM267	-0.733948	0.0094906
CLCC1	-0.733888	0.000600501
EPG5	-0.733277	3.87187403925783e-06
TERF1	-0.733243	0.00204237
ZNF605	-0.733065	0.000111457
SLAIN2	-0.732865	5.34711246616788e-06
LOC122431282	-0.732468	0.0125119
ATP2B4	-0.732145	1.47348111085624e-06
LOC122442137	-0.731493	7.0436869441399e-06
PTGER2	-0.731469	0.00104617
SOS1	-0.731451	2.40810263791229e-09
CRYBG3	-0.731295	0.00160469
DCBLD2	-0.731175	1.08023597900269e-05
TTK	-0.731115	0.0319985
C1H4orf46	-0.730999	0.0027185
CADM1	-0.73083	3.00314168115059e-05
NOPCHAP1	-0.73013	0.0115794
TXLNG	-0.729861	1.37101802958485e-05
KCTD3	-0.729483	0.000549731
CILK1	-0.729377	0.000126564
RWDD3	-0.729179	0.00357712
PLCG2	-0.729135	1.79437404654511e-08
VKORC1L1	-0.729131	2.66584354620707e-05
LOC122422266	-0.728503	0.0479276
RNF144B	-0.728474	0.000871056
UTRN	-0.728283	2.306725705249e-05
LOC122439387	-0.728264	0.0281877
CLPX	-0.728062	0.000325779
SOAT1	-0.727965	0.000277169
CEMIP2	-0.727681	6.4399961783762e-08
KTN1	-0.727667	0.000252998
STAM2	-0.727516	7.20994468699281e-08
MSI2	-0.72696	4.15217347412658e-06
MZT1	-0.726918	0.0254712
LOC122438259	-0.726272	0.0310006
TCERG1	-0.725734	1.16182217959459e-08
TAF2	-0.725705	7.04697391854266e-10
EXOC1	-0.725612	1.42039024241691e-08
LOC122435329	-0.725549	0.0128994
GPATCH2	-0.725499	0.000860321
HDAC2	-0.725464	0.000144176
RECQL	-0.725021	2.32113985968028e-05
LOC122437042	-0.725018	0.0210076
DYRK2	-0.724721	0.00056311
PITPNC1	-0.724589	1.64274336169236e-07
LOC122438090	-0.724587	4.02651123759083e-05
AP4E1	-0.724502	0.000389843
DHX40	-0.723727	7.4478612955804e-06
MAT2A	-0.723717	1.12522178404586e-07
USP15	-0.723625	0.000150824
LOC122420029	-0.723573	0.000361781
DENND1B	-0.72288	0.00172999
CPNE8	-0.722814	0.00110086
PHF2	-0.722495	9.31052674074458e-07
ARID1B	-0.72226	6.08637573342386e-09
LOC122432108	-0.722182	0.0266452
RBL1	-0.722086	9.86234097132636e-07
PMAIP1	-0.721993	0.00317783
CHUK	-0.721451	0.000163087
LOC122420720	-0.72138	0.000721882
PHF3	-0.721294	1.17130003359695e-05
SMIM15	-0.72129	0.00135336
MGAT4A	-0.721132	1.82831635471932e-06
TPP2	-0.721126	4.24860141591184e-06
KIAA2026	-0.721116	6.93034682925321e-06
DPY19L3	-0.721076	5.51506963080309e-05
GPR180	-0.720678	0.000131432
LOC122426885	-0.720583	9.60433457336163e-07
NRBF2	-0.72056	5.33785662522537e-06
LOC122421412	-0.720072	0.0354985
MTR	-0.720031	2.62084854147989e-07
FAM120A	-0.719252	0.000102236
LOC122450939	-0.719051	0.0287985
MYO9A	-0.718738	0.000158457
PIGX	-0.718225	0.000274555
YARS2	-0.718078	0.000347122
ZHX1	-0.717933	0.00318265
CCNT1	-0.717868	1.54462547947217e-08
SC5D	-0.717762	0.000793643
MCM10	-0.71756	1.98671922300677e-05
MFSD14A	-0.717287	1.21650580076849e-05
RHPN2	-0.717034	0.0337381
CAMK2D	-0.716982	4.00321443266354e-06
ATG4C	-0.716614	0.000964217
METAP1	-0.716479	0.000804204
ATP2A2	-0.71641	2.20705138109549e-10
TRPS1	-0.716226	5.3038461996024e-07
DHX9	-0.716047	5.13146369243875e-11
H1-6	-0.715504	0.0225249
NLK	-0.715252	6.15815824971225e-06
DEK	-0.714904	0.00103695
SCML1	-0.713826	0.00176486
FAM185A	-0.713774	0.0256617
USP9X	-0.713276	4.195034741033e-08
AGGF1	-0.713105	1.37217482102724e-05
TRAK2	-0.712708	4.4099601985718e-05
LOC122439776	-0.711345	6.11951066584924e-05
TDRD1	-0.711164	0.0212376
USP34	-0.711103	1.63220498254126e-09
LPGAT1	-0.710888	0.000136086
ZNF624	-0.710859	0.00668302
MPDZ	-0.710751	0.00245266
NIPA1	-0.710435	0.00228854
AVL9	-0.709965	6.52071422917938e-06
LACC1	-0.709821	0.00181838
PRKCE	-0.709768	1.10149125822175e-05
STAM	-0.709638	4.03278796059568e-05
RECK	-0.709495	0.00207861
KIAA0825	-0.709271	0.0106279
CNOT4	-0.70921	8.45246440372047e-07
ZNF81	-0.708641	0.00150992
ARID4A	-0.708203	0.000148245
ATG14	-0.70818	4.97894813607558e-05
AASDHPPT	-0.708087	0.00124086
VEZF1	-0.708027	4.40324320652195e-05
CENPL	-0.708017	0.00272431
GPR137B	-0.707782	3.47164045156396e-05
UST	-0.707739	1.13093087723263e-07
PLEKHF2	-0.707615	0.00281948
PRKAR2B	-0.707199	0.00882064
NUP155	-0.706763	1.41902030211722e-05
LOC122420034	-0.705795	0.0023072
ANTXR2	-0.705166	1.50373439718846e-06
GABPB1	-0.705001	0.000273395
ABI2	-0.703657	9.70714262680112e-05
ZNF518B	-0.703627	2.77897121049033e-05
RSPRY1	-0.703603	2.00878672486963e-11
URI1	-0.703408	0.000823961
ADPRM	-0.703354	7.71548531600284e-05
QRSL1	-0.703057	1.01047095104476e-05
CBR4	-0.702524	0.000366042
MSANTD4	-0.70237	0.00144152
CHST3	-0.702118	0.000787939
SGK1	-0.701988	8.9578560280054e-05
RSBN1L	-0.701968	0.000330146
CEP83	-0.701935	0.000124228
FUT11	-0.701885	7.94448460489517e-07
SLC25A16	-0.701799	0.00604059
NUDT6	-0.701472	0.0176036
PCYT1A	-0.700914	8.36607882659942e-07
ZC3H7A	-0.700688	2.75659983151126e-08
XPNPEP3	-0.700472	1.13129769020526e-06
AAK1	-0.700378	3.08981193754894e-07
ARID4B	-0.700376	0.000276885
MSH6	-0.700323	8.59913200082818e-07
VPS36	-0.700315	0.000242548
PFKFB2	-0.700091	1.28576424700668e-06
PLRG1	-0.700045	0.00851111
BPTF	-0.699913	6.22955671235301e-06
C18H16orf46	-0.699575	0.0322455
SPART	-0.699309	0.0184425
GRPEL2	-0.69926	0.00335321
ALG11	-0.699223	5.36994820005494e-06
TULP4	-0.699155	0.000283254
TAOK3	-0.698976	4.61901651566627e-05
MASTL	-0.698745	0.0247021
ABRAXAS1	-0.698582	9.51934802056636e-05
SNAPC1	-0.698375	0.00118403
CASP8AP2	-0.698126	0.00014566
MAPRE1	-0.697884	5.75029784397424e-05
ZC3H13	-0.697215	9.55990158054431e-06
ENPP5	-0.696358	2.03831563746182e-06
SLC7A1	-0.696282	8.74685622838054e-12
TUT7	-0.69627	1.67637245250424e-06
USP47	-0.696193	4.23698382711881e-06
NKRF	-0.695948	6.24524469006681e-05
DNAAF2	-0.695759	0.00208215
ZNF12	-0.695609	0.000169007
MITF	-0.695544	0.0021057
POT1	-0.695452	0.000225522
PIGA	-0.695166	0.0118323
KPNA3	-0.695015	0.00031158
MID2	-0.694964	1.27551586730054e-05
CRY1	-0.694718	1.70822753963909e-06
ARHGAP18	-0.694522	0.000710023
SERAC1	-0.694274	2.4481661680224e-07
HCFC2	-0.693923	3.14552711929232e-06
LOC122438566	-0.693411	0.0241282
KLF10	-0.693374	0.000238387
GDAP2	-0.692836	0.000144536
TMEM38B	-0.691985	0.0167715
LOC122431605	-0.691351	0.029543
ZC3H6	-0.691243	7.43507350443066e-05
CCNC	-0.69121	0.00160588
BEND7	-0.691167	0.00413451
GNAI3	-0.690965	0.000529398
TENT5C	-0.690918	0.00269306
HELLS	-0.690513	0.0180978
ARL5A	-0.690228	0.000376973
FAM107B	-0.689777	7.04433930947218e-08
LOC122420065	-0.689497	0.0390157
RWDD4	-0.689472	1.82426497740269e-05
ZNF41	-0.689367	0.000530689
OBI1	-0.689248	0.00427111
RPP14	-0.688987	0.000264654
ZRANB2	-0.688036	0.000689866
STX12	-0.687945	0.00114888
HACE1	-0.687256	2.46073528461969e-05
FGD6	-0.687009	0.0134185
C2H1orf52	-0.686888	0.000184053
LOC122422510	-0.686726	2.71100000879257e-05
MTERF2	-0.686468	0.00127203
LOC122447495	-0.686337	0.0363001
DCUN1D2	-0.685887	0.000155862
ARHGAP11A	-0.685771	0.0139491
ZNF891	-0.685624	0.0219916
MTDH	-0.685397	0.000196525
EFCAB7	-0.685384	0.00675745
ATAD1	-0.684884	0.0196256
KRT25	-0.684873	0.000144875
MCMDC2	-0.684616	0.0358467
TMEM237	-0.684198	0.0191784
MEGF9	-0.68413	0.00708053
PHF20L1	-0.68391	1.26743877779318e-06
DNAAF9	-0.683866	0.00239599
ZNF793	-0.683657	0.000479438
PAX5	-0.683579	0.0001916
SLC30A6	-0.683353	0.000438166
SLC35G1	-0.683213	0.00550155
LOC122421102	-0.683181	3.2109271446068e-09
LOC122427559	-0.683173	0.00797585
TMEM65	-0.683146	0.0247088
TDG	-0.682974	3.9972428551914e-05
KLHL8	-0.682583	0.000570958
KIF18A	-0.682485	0.0206328
CREBL2	-0.682145	0.00074403
TBC1D9	-0.682031	4.0596078160615e-07
PRPF38B	-0.681381	8.8376197363425e-05
KHDC4	-0.680816	3.14535130400304e-06
CDK8	-0.680688	1.43916245870416e-05
KLHL42	-0.680489	5.35790008654424e-05
TAF5	-0.680002	0.000316587
ARL13B	-0.679895	0.00885803
TRIM36	-0.679593	0.00645896
PPM1D	-0.679374	0.000106245
UVRAG	-0.67918	0.000185969
NF1	-0.678923	0.000150634
LOC122420724	-0.678909	0.0260241
TNKS	-0.678675	6.42967359535567e-06
CCPG1	-0.678516	5.25627160387449e-06
[truncated: 1,604 more rows]

## Sheet: upregulated
Supplementary Table S5 - Upreglated genes in Calves (D0xD14)
gene_id	log2fc	padj
SMARCD1	0.190304	0.0428435
EHMT1	0.191198	0.0163538
SF3B2	0.196031	0.0403595
ATP5F1B	0.198168	0.0384851
POLDIP3	0.19932	0.0154655
DNAJC14	0.199801	0.0358928
STN1	0.202629	0.038555
DDX27	0.204394	0.0165139
EWSR1	0.208088	0.0096701
TMED4	0.212841	0.0154463
LRRC8A	0.215974	0.0340061
MAPKAP1	0.219052	0.0320928
PLCL2	0.220907	0.0328471
CLP1	0.221093	0.0287291
RAB7A	0.22204	0.045358
PSME3IP1	0.222822	0.0126101
CALCOCO1	0.223597	0.0460542
PSMD2	0.223652	0.0178113
BABAM2	0.225575	0.0221019
DAZAP1	0.225731	0.00971514
FAM219B	0.226614	0.0161484
BUD13	0.227215	0.0400016
PPM1G	0.227919	0.0331774
P4HB	0.228225	0.0106424
FAM78A	0.228258	0.0361909
LOC122447897	0.228866	0.0283132
RASA3	0.2292	0.0315008
HMGXB3	0.229934	0.0431492
THOC5	0.230713	0.0249246
NARF	0.231128	0.00461058
TPD52L2	0.232179	0.0189215
ATF4	0.232485	0.0294098
NMT1	0.232496	0.0107019
USP5	0.234488	0.00758236
IMP3	0.234927	0.0365471
DNAJA3	0.235873	0.0136338
SAE1	0.236084	0.0336509
MRPS9	0.236096	0.0336079
EIF4E2	0.236508	0.0102693
PFDN2	0.236595	0.0234067
SF3B4	0.236721	0.0118204
DPAGT1	0.236832	0.0366724
NUP62	0.237265	0.0150345
DKC1	0.2393	0.00533692
SZRD1	0.239881	0.0412278
PSMC2	0.239927	0.0306666
IVD	0.241492	0.00881236
NOP14	0.241609	0.0218526
ARL8A	0.242651	0.049534
H1-2	0.243767	0.0460542
NF2	0.244018	0.00891013
LOC122454877	0.244067	0.0452163
CTDNEP1	0.244314	0.0225053
UBE2J2	0.244429	0.0255394
LEPROTL1	0.245036	0.0386111
PYGO2	0.246335	0.047237
GTPBP1	0.246997	0.0138497
COPS7B	0.247133	0.0259282
ABCF2	0.247591	0.0124788
PRPF6	0.248122	0.0204857
PA2G4	0.249222	0.010792
ZBTB7A	0.249266	0.0136745
HARS1	0.251214	0.0147543
VPS18	0.254539	0.0475098
CHD3	0.255849	0.0337381
LUC7L	0.256376	0.0246099
SMARCD2	0.256579	0.0325054
EIF4A3	0.256798	0.00274766
USB1	0.256945	0.0390157
LOC122437335	0.257006	0.0265261
DLST	0.257196	0.00272957
MRPS5	0.258092	0.0408271
LETM1	0.258142	0.00974395
LOC122425139	0.25884	0.0079531
TDP1	0.259209	0.0464868
PPME1	0.259312	0.00876953
NFIC	0.259813	0.0428029
POMGNT1	0.260758	0.0344229
DCTN1	0.260842	0.00612801
TINF2	0.26087	0.0362485
MRPL37	0.26121	0.0281305
PPIH	0.261298	0.0105908
EXOC3	0.261714	0.0204668
LOC122429623	0.262963	0.0192835
RPL30	0.263232	0.0201936
BET1L	0.265387	0.0214733
RAB35	0.26555	0.00242161
DNAJC11	0.265573	0.00287264
UBE2V1	0.265789	0.0128807
CCDC12	0.266067	0.00959837
HIKESHI	0.266288	0.0475098
DEDD	0.266784	0.0414706
CHMP7	0.267056	0.00210879
CHAF1A	0.267141	0.0423797
CD96	0.267882	0.0450569
SMG6	0.268123	0.0411553
RAD23A	0.268332	0.00460157
MYBBP1A	0.269869	0.0478136
ARPC2	0.270688	0.00261715
VARS1	0.270903	0.0285239
SNU13	0.271031	0.0137945
STX18	0.271972	0.048188
SNX20	0.272245	0.0283263
RGS3	0.272355	0.0151269
LOC122429635	0.272401	0.03341
LOC122437308	0.272797	0.0150558
HYPK	0.273062	0.0405822
CTNNBL1	0.274038	0.0187008
USP11	0.274281	0.0403208
RAD52	0.274382	0.0232462
LOC122443771	0.27485	0.00415814
USP36	0.275138	0.0397432
XBP1	0.275394	0.0142166
LOC122448282	0.276012	0.0252509
RBM8A	0.276357	0.0175121
LOC122450875	0.276623	0.0453174
LOC122429098	0.276688	0.0187008
MESD	0.277136	0.0215937
LOC122443201	0.277536	0.0202533
CALM3	0.277537	0.0150996
CFDP1	0.277577	0.0432416
SDHC	0.277767	0.040565
PRKAB1	0.277786	0.0126769
ZNF646	0.279096	0.0156217
AATF	0.279168	0.0291203
SELENOS	0.279449	0.0363747
PIGT	0.279882	0.0170953
NEU1	0.279999	0.0359701
GSN	0.280555	0.0210184
ARPC5L	0.280583	0.0050342
AIMP2	0.28153	0.0207196
SFXN2	0.282277	0.0221042
C29H11orf98	0.282352	0.0294663
RUFY1	0.282744	0.0392593
LOC122452919	0.282884	0.0462646
LDHB	0.282924	0.00793501
NOP56	0.283255	0.0106711
CFL1	0.284827	0.00929184
ITGB1BP1	0.285268	0.0347448
NGRN	0.285917	0.00903828
NELFA	0.286071	0.00903054
TXNDC11	0.286223	0.0111584
RBM19	0.286244	0.0253939
AMBRA1	0.286294	0.0114683
ACSS2	0.287713	0.0083934
EML2	0.288277	0.0235926
RPS27L	0.289138	0.01739
PLP2	0.290498	0.0191271
ADIPOR2	0.290859	0.0173849
RANBP3	0.290933	0.001752
TSR2	0.290978	0.0165313
MLLT1	0.290992	0.0269895
ESYT1	0.291109	0.0463391
TNPO2	0.291687	0.010286
CHMP4B	0.29229	0.00323367
ERP29	0.292802	0.00170635
SLC25A4	0.29318	0.0406563
AIFM1	0.293771	0.00505035
AP2M1	0.293898	0.00228058
LOC122451379	0.29401	0.040623
SLA	0.294186	0.0365678
NRBP1	0.294274	0.000214759
GALNT6	0.295371	0.0182046
MCPH1	0.296233	0.0100757
LDB1	0.296329	0.00850165
DVL2	0.296503	0.0376928
MRPS27	0.296506	0.0453399
RPL37A	0.296665	0.0182885
CABLES2	0.296849	0.0328678
ALG1	0.296884	0.0225549
GUSB	0.29694	0.00500729
MSRA	0.297849	0.0142347
PWWP3A	0.298052	0.00602552
EXOSC1	0.298086	0.0269573
LETMD1	0.298439	0.00682082
LOC122448612	0.298486	0.00817521
LOC122439783	0.299533	0.0488015
GANAB	0.299926	0.0249066
LOC122447382	0.299992	0.00674549
CDKN2D	0.300256	0.0162156
PARK7	0.300747	0.0357607
NOB1	0.301205	0.00646425
EIF3L	0.301676	0.00544095
PSMG2	0.302831	0.0289576
TBCD	0.3029	0.0187049
APEX2	0.303148	0.0059124
SPCS1	0.303364	0.0230708
NDUFS6	0.303719	0.0158055
SEC61A1	0.303798	0.00512884
CCDC137	0.303938	0.0069544
ARPC3	0.303975	0.00819619
RPS21	0.303998	0.0145155
SLC44A2	0.304191	0.0119166
EIF3F	0.304232	0.0422565
RBM38	0.304422	0.0251203
KLHL18	0.304678	0.0179634
ACO2	0.30494	0.000369237
PEF1	0.30495	0.0350672
WDR5	0.30509	0.0112285
GCN1	0.30539	0.0478251
PSMD9	0.305696	0.00229234
RNF114	0.30682	0.00488933
COQ6	0.307116	0.0227477
HAUS8	0.307137	0.0210527
ALAS1	0.307213	0.0078699
ZNF576	0.307254	0.0387082
CLUH	0.307466	0.0446327
WDTC1	0.308305	0.0129824
RUVBL1	0.309084	0.0097155
ARHGAP30	0.310067	0.00694078
LOC122447337	0.310513	0.0462418
ANP32A	0.310704	0.00156543
SUPT5H	0.311072	0.00714317
EMG1	0.311189	0.0185192
EFHD2	0.312076	0.0295195
ANXA2	0.312409	0.0147788
GNAI2	0.312652	0.0239115
PINX1	0.312669	0.0423163
MDH1	0.312731	0.0155623
DDX39B	0.312768	0.0231102
MMS19	0.312813	0.00195456
ACP6	0.312956	0.0283611
ANKZF1	0.313538	0.0386998
MFNG	0.313852	0.0339615
SLC29A3	0.313925	0.0201073
LOC122423043	0.314224	0.01634
MLH1	0.314365	0.048814
CDK5RAP2	0.314392	0.0100133
COQ9	0.314631	0.0249777
LOC122426368	0.314847	0.00549705
FDPS	0.315461	0.00151302
WRAP73	0.315947	0.019022
PLOD3	0.316044	0.0470903
IMPDH2	0.316505	0.00160385
DOT1L	0.316711	0.0447445
AGAP2	0.317051	0.0194826
WDR91	0.317115	0.00147947
HDAC3	0.317154	0.00315584
LOC122424641	0.317407	0.0361122
POLB	0.317605	0.0282493
LOC122426643	0.318284	0.00817709
VTI1B	0.318506	0.0152538
TOR3A	0.318848	0.0377593
ABCF3	0.319449	0.00313982
MID1IP1	0.319584	0.0229026
FANCG	0.319586	0.0251536
MGAT1	0.319595	0.00880545
ZKSCAN5	0.319855	0.0050342
MAPRE3	0.319895	0.0154438
IP6K1	0.320129	0.0293501
PARP6	0.321	0.0260294
COPS3	0.321059	0.000164606
OAZ1	0.321518	0.0143304
LOC122437923	0.322132	0.0194784
DLG4	0.322263	0.0465298
TNFRSF8	0.322876	0.0431336
LOC122423439	0.322903	0.00567463
COQ10A	0.322956	0.0235629
AAAS	0.32304	0.00841596
RPS2	0.323064	0.020228
MEPCE	0.323127	0.00255531
SAMM50	0.323655	0.00337189
NISCH	0.324137	0.00414318
ZNHIT3	0.32416	0.0221679
IRF1	0.324267	0.0419333
EBNA1BP2	0.324608	0.00133948
CACTIN	0.324945	0.00332967
MAP3K12	0.325041	0.0458695
AKT2	0.325596	0.00750356
ZNF629	0.32568	0.0268324
FBXO7	0.325819	0.00949942
GRK2	0.326163	0.0157372
IRF8	0.326819	0.0247308
MED8	0.327237	0.003862
DNTTIP1	0.327386	0.00236143
PRMT7	0.327411	0.00755684
LOC122427483	0.327477	0.0214939
NOC2L	0.328106	0.00766758
KAT2A	0.328226	0.0161907
EXOSC7	0.328977	0.00429689
GNL3L	0.329347	0.000270028
ATP6V1E1	0.329798	4.10908089693954e-05
PRKCD	0.330239	0.0414706
PFN1	0.330841	0.00790727
PGPEP1	0.331098	0.00148491
PRDM11	0.331129	0.0110927
RAVER1	0.331372	0.0121458
INPP5E	0.331445	0.0336205
MRPL30	0.331593	0.031957
ELMOD3	0.331902	0.0082693
RAC2	0.331957	0.0284038
RER1	0.332213	0.000367173
STRIP1	0.332549	0.00465693
MRPL16	0.332767	0.0219553
EIF2B4	0.332885	0.00580015
LPCAT1	0.333384	0.0138161
SMIM7	0.333555	0.00132712
RSAD1	0.333839	0.0323477
SAMD4B	0.333924	0.0260135
TAOK2	0.334284	0.0147514
GLIPR2	0.334851	0.0481384
NFYC	0.334864	0.0007929
PIGS	0.335101	0.0108232
CIAPIN1	0.335234	0.000508174
TUBB4B	0.335732	0.000847259
LOC122447803	0.336147	0.00350296
EEF2	0.336567	0.0158173
HSBP1	0.336708	0.0106375
TTC1	0.336753	0.00678143
PI4KB	0.33688	0.0111332
RPSA	0.336941	0.02766
CAPS	0.33716	0.0161798
PPP2R5D	0.337473	0.000274205
LOC122435061	0.337565	0.0444818
ZPR1	0.337891	0.00065237
RBFA	0.337908	0.00247975
NIBAN2	0.337991	0.0118815
CLIP3	0.338174	0.0298079
TRAPPC9	0.338536	0.00083721
NACA	0.338875	0.0403595
FBRS	0.338901	0.0342691
LRRN4CL	0.338946	0.0251032
RETREG3	0.338994	0.000462328
AK2	0.339093	0.00244019
SYTL3	0.339589	0.0388064
GPX7	0.340256	0.0183242
HDGF	0.340354	6.83097909262009e-06
PLPP5	0.340423	0.00872367
C32H16orf91	0.341713	0.0373273
CCAR2	0.341919	0.00904945
PRDX4	0.342221	0.00851347
LRRC41	0.342595	0.0094773
E2F4	0.342853	0.00363427
IDH2	0.34291	2.88639592684809e-05
TAF15	0.342984	0.00205195
TTC7A	0.343174	0.020519
DHX37	0.34337	0.027671
ZBTB4	0.343745	0.017712
FAM131A	0.343891	0.0333117
AEN	0.344186	0.049227
VPS72	0.344489	0.000521859
POC1A	0.344971	0.0408056
IL2RG	0.34534	0.047237
RPS26	0.345356	0.0486312
RPS14	0.345707	0.00826542
MPC2	0.345779	0.0352349
CNPY2	0.34633	0.00129792
DERL2	0.346924	0.000881041
EIF2AK1	0.346932	0.000578031
GGA3	0.346996	0.0179396
ZNF668	0.347657	0.0153535
TBC1D13	0.347939	0.0422378
TAP2	0.348524	0.0178457
LOC122455265	0.348785	0.00906439
MAP7D1	0.348811	0.0233414
NXF1	0.349297	0.0170511
TMEM229B	0.349384	0.0488341
CNPY4	0.349484	0.0130283
ZDHHC16	0.34965	0.00579149
DRG1	0.349704	0.0036546
TTLL12	0.35016	0.000784243
WDR73	0.3502	0.018105
LOC122441308	0.350273	0.00276265
ATG7	0.350551	0.0108232
ARPC1A	0.350598	0.000159982
PRR13	0.350798	0.000115345
UROS	0.350985	0.0168644
PPP2R1A	0.352145	0.00322391
JPT1	0.352312	0.00911408
DHRS7	0.352327	0.00778182
TMCO6	0.352507	0.047464
TEF	0.352776	0.0027827
TXNDC5	0.352936	0.0383291
TTC38	0.35322	0.000407967
TATDN2	0.353919	0.0101028
ACTR3B	0.353936	0.0115306
DDX56	0.354349	0.00710728
TRMT10B	0.354515	0.000937917
MARCKSL1	0.355186	0.0489501
ACSS1	0.35523	0.0227462
ZMAT2	0.35529	0.0115699
MPC1	0.355723	0.0102122
FMNL3	0.356463	0.012272
SNRPC	0.356897	0.00012915
SRP68	0.357245	0.000731951
ARPC4	0.357271	0.0071173
RPL32	0.357579	0.00332169
LOC122436465	0.357636	0.00469769
MOV10	0.358442	0.00187943
STK40	0.358608	0.023422
LIMK1	0.358615	0.044735
RAB11FIP3	0.358683	0.0326291
BAG6	0.358826	0.00348001
MINK1	0.359145	0.0125639
CALHM2	0.359224	0.00278395
KATNB1	0.359547	0.00171725
AP2A2	0.359565	0.00138177
CEP164	0.359638	0.0258777
SOX12	0.359771	0.0104598
SIL1	0.359905	0.0458485
BYSL	0.360009	0.0291602
DNAJC5	0.360067	0.00218251
POMT2	0.360828	0.0233537
ADA2	0.360996	0.0284948
RPN1	0.361003	0.000165249
PITHD1	0.361227	0.00253731
ATOX1	0.361288	0.00693166
EMC8	0.361383	0.00704742
SARS1	0.361425	0.000525154
PPP1R7	0.362087	0.000569047
LOC122439036	0.362164	0.0340946
INO80C	0.362356	0.000178364
LTO1	0.362602	0.00199082
TMEM186	0.362987	0.034169
GLRX5	0.363618	0.0011559
FANCA	0.363746	0.0252574
POLR1C	0.363769	0.00349494
TRIM11	0.363956	0.0072984
TBC1D9B	0.364009	0.000726781
ATRAID	0.364397	0.00598066
RETREG2	0.364679	0.00418288
OBSL1	0.364859	0.0398387
SLC46A2	0.365267	0.0359483
MRPS23	0.365606	0.00020477
FBXL12	0.365643	0.00326562
FMNL1	0.365757	0.04525
PAF1	0.365985	6.91617940395761e-05
BLVRA	0.366288	0.01712
LOC122431318	0.366415	0.0272455
PLOD1	0.366576	0.0167139
RASGRP2	0.366619	0.0076886
G6PD	0.366695	0.0195223
FEN1	0.366796	0.0176586
POLE4	0.367008	0.0103428
RPL26	0.367029	0.00950789
PTRH2	0.367057	0.00261114
SH3GL1	0.367193	0.00909425
PSMD13	0.367208	0.000312241
ING1	0.367377	0.000529453
MOB3A	0.367882	0.00550461
AKIP1	0.368469	0.00358752
OSER1	0.369507	4.00315038703941e-05
LRRC47	0.369999	0.000211071
UBB	0.370021	0.00385952
GPKOW	0.370277	0.00140913
PHF19	0.370306	0.0119076
THOP1	0.371433	0.0119616
TRMT112	0.371449	0.0156762
YIPF3	0.371537	0.0164136
U2AF1	0.371755	0.000867909
HAX1	0.37185	0.0331271
MKNK1	0.371936	0.0438835
SLC43A2	0.371984	0.00969786
PSMB3	0.372054	0.0018912
UFD1	0.372068	0.00225884
PTDSS1	0.372085	0.000210346
CBX8	0.372155	0.036421
PPIA	0.372495	2.08683805448729e-05
RPS5	0.372831	0.00917319
SLC12A4	0.372895	0.00863676
EHMT2	0.373043	0.00134559
PTPN6	0.373202	0.0247308
PHF23	0.373219	0.000770601
ZCCHC17	0.373252	0.00599716
MRRF	0.37329	0.0105223
SERF2	0.373486	0.00255568
YIPF2	0.373517	0.0293501
COQ5	0.374279	0.0453693
DCP1B	0.374598	0.00381792
LLGL1	0.374775	0.0221887
TMEM94	0.374841	0.0130082
INPP5A	0.375011	0.00910884
NECAP2	0.375109	0.00199453
GIPC3	0.375343	0.0039469
LOC122442083	0.376013	0.0225249
DDX54	0.376477	0.000123941
VPS33B	0.376549	0.000923167
LOC122424708	0.376716	0.0304379
SUOX	0.376726	0.0206343
TP53RK	0.377299	0.031975
SUPT3H	0.377429	0.0439061
MICU1	0.37745	0.00540697
TMCO4	0.378361	0.015792
FBXL18	0.378429	0.0426537
KLHL36	0.378494	0.0428559
NDUFA9	0.378582	0.00150127
AGFG2	0.37861	0.00599716
PEPD	0.378676	0.000563195
AP3S2	0.378796	0.000184735
ARHGAP1	0.378805	0.00589486
SLC25A42	0.379065	0.0183422
LOC122439829	0.37928	0.0130527
C4H19orf71	0.379321	0.0248882
NR1H2	0.380006	0.00870972
NELFCD	0.380062	0.000308166
CD247	0.380373	0.00351549
ITGA3	0.380473	0.0417491
PHLDB1	0.381071	0.0199827
BCAP31	0.381138	1.02860202494026e-05
ZNF174	0.381628	0.00802382
FBL	0.381669	0.000538845
SLC25A22	0.382009	0.0439887
SAMD1	0.382103	0.00185913
DLGAP4	0.382198	0.00122686
ISCU	0.382215	0.000305334
P3H1	0.382734	0.00865613
LOC122430947	0.382981	8.72988461294204e-06
RUSC1	0.383055	0.0241936
SLC9A3R1	0.383243	0.00570915
ANKRD52	0.383802	0.00262817
CDK9	0.384026	0.00345173
IL4R	0.38411	0.015751
TBCA	0.38483	0.0139266
EVL	0.385143	0.00284887
YPEL1	0.385167	0.0116088
TLE2	0.385405	0.033146
ZNF691	0.385522	0.0318216
ARMC5	0.385574	0.00726319
IGF2BP1	0.385767	0.0228176
ARHGEF1	0.385805	0.027467
LOC122436469	0.385882	0.00662167
CD81	0.385953	0.00841596
ZNF16	0.385979	0.0132907
IPO4	0.385989	0.0144707
PIGC	0.386216	0.00128933
NAIF1	0.386339	0.00882755
SNRPA1	0.386518	2.87127791456572e-05
RAB42	0.386944	0.00111274
PISD	0.386945	0.00742486
SDHA	0.386965	0.00172695
EIF4EBP3	0.387557	0.00608676
BLOC1S3	0.387562	0.0121855
CXCR5	0.387597	0.00792209
GMPPB	0.387738	0.00941775
FOXP4	0.387803	0.00886269
MAGED2	0.388262	0.00269922
SH3BP1	0.388923	0.00200255
DTD1	0.388926	0.00436028
IRF2BP1	0.389162	0.00540369
BCL7B	0.389303	0.00415676
NIT2	0.38966	0.00412696
FOXO4	0.389755	0.00225019
ACTR1A	0.389789	0.000183207
C32H16orf54	0.390157	0.00295086
COG8	0.39024	0.00212422
KLC4	0.390584	0.00226816
PHRF1	0.390975	0.0102185
IL1RN	0.391061	0.0336394
REXO1	0.391319	0.000340277
PIK3R5	0.391346	0.0079347
RPL13A	0.391426	0.00400239
DNM1	0.392047	0.0262688
KCTD11	0.392069	0.00434757
LOC122445460	0.392197	0.00143031
SDHB	0.392198	4.79545610419809e-05
KYAT1	0.392249	0.025297
PXDC1	0.39225	0.0199813
COMT	0.392293	0.0153535
METTL25B	0.392578	0.0104499
RAD51D	0.392845	0.0112779
MCM5	0.393065	0.00702839
FZR1	0.393456	0.0040144
NRDE2	0.393517	0.0125879
NAV1	0.393542	0.00738718
DNASE1	0.393624	0.00893764
ARHGEF18	0.393751	0.0056172
LOC122452561	0.393787	0.000156651
ZDHHC3	0.393973	0.00328987
PLCB2	0.394001	0.0436626
TNK1	0.394213	0.0488075
FCHO1	0.394244	0.00533692
STMN3	0.395042	0.0373985
LOC122437921	0.395206	0.0386128
DCPS	0.395361	0.00335697
CCDC86	0.395515	0.00198725
TADA3	0.395676	0.000111911
MSH5	0.395803	0.0100369
RGS10	0.395963	0.00286206
LMAN2	0.396007	3.71216950183912e-05
LOC122441757	0.396422	0.00162527
SYAP1	0.396761	0.00756852
DPH7	0.396789	0.00151524
TIMM44	0.396854	0.00110086
NPHP1	0.396921	0.0107366
MPI	0.396948	0.00143356
NOL6	0.397103	0.000778546
AHCY	0.397238	0.00983846
LOC122427071	0.397777	0.00240661
PPCDC	0.397915	0.0052721
FERMT3	0.398083	0.00664228
NICN1	0.398171	0.00461078
TMEM129	0.398285	0.0147754
SDR39U1	0.398328	0.0249602
INPP1	0.398403	0.00608004
TMSB4X	0.398788	0.000246486
LSM1	0.39916	0.0366159
AKAP8L	0.399228	0.0238122
SLC12A7	0.399568	0.0402267
TOMM7	0.399908	0.0147941
DNM2	0.399926	0.0344229
PPT2	0.399942	0.0128975
FAM50A	0.400117	4.33676902467997e-05
VPS16	0.400275	0.0235627
CNOT3	0.400332	0.00342559
CLIC1	0.40041	5.33809813942132e-05
TMA16	0.400562	0.038019
LOC122429686	0.40079	3.57818481572169e-05
DHDDS	0.4008	0.000209919
HS6ST1	0.401435	0.00120165
LOC122447142	0.401533	0.00172398
RAPGEF1	0.401589	0.00111653
GNG5	0.401722	0.000253569
ASRGL1	0.401821	0.0224947
INPPL1	0.402939	0.0129186
SLC25A19	0.402949	0.0144132
TCEAL4	0.403253	0.0160568
DENND1A	0.403305	0.00892244
PPP1R12B	0.403342	0.00252688
TTC31	0.403435	0.0052517
SSBP4	0.403437	0.0244641
NACC1	0.40358	0.000273683
ZNF672	0.403581	0.0314723
SIRT7	0.403793	0.00665454
NTAN1	0.403841	0.000549731
RPP25L	0.404148	0.000259584
ANKRD54	0.4043	0.000117575
HDHD5	0.404344	0.0260512
LOC122436794	0.40436	1.26946161287078e-06
BBS1	0.404662	0.00261155
DOCK3	0.404796	0.0210575
PSMB5	0.404801	0.0033787
RBM3	0.404954	0.000662667
CUL7	0.405129	0.00161102
MFSD10	0.40538	0.0465871
EIF2B5	0.405453	0.00046033
LOC122431037	0.405618	0.0373688
LOC122433028	0.405827	0.00512481
GAPDH	0.406249	0.0107019
CKB	0.40625	0.0371241
FARP2	0.406264	0.0062479
NUDCD3	0.406427	0.000901236
SUMF2	0.406485	0.00704503
C4H19orf38	0.406554	0.033734
EIF3M	0.407174	0.0265831
ABCC10	0.407273	0.0495005
HK3	0.407892	0.0304949
NLRP1	0.408188	0.0491841
TBC1D25	0.408274	0.0103296
LOC122448169	0.408628	0.0275665
NUP85	0.408724	0.000174727
DPH1	0.409001	0.0316482
UBE2G2	0.409343	4.61576640320006e-05
VPS37C	0.409522	0.00513912
EMC4	0.409661	0.00786547
SRP14	0.409805	0.0213475
GDI1	0.409844	0.012379
SEC61B	0.409878	0.00861991
ITM2C	0.410144	0.00192469
LOC122443232	0.410349	0.0369149
VPS26C	0.410795	1.57689440845672e-06
RPL18	0.410811	0.0289032
OS9	0.411401	6.20037669961171e-06
C8H10orf143	0.411419	0.00674871
LCMT1	0.411582	0.000446264
RIN3	0.411798	0.00232259
ALKBH4	0.412168	0.0285239
KARS1	0.412205	0.00445184
LOC122426180	0.412304	0.00260481
C21H12orf73	0.412894	0.0219002
S1PR4	0.413102	0.00344293
LONP1	0.413327	7.93675273390539e-05
RNF40	0.413398	0.000137406
HECTD3	0.413498	0.00013232
TRAPPC4	0.413576	7.70583610490311e-05
NPC2	0.413744	0.0422484
GAS8	0.414031	0.0183744
PSMB1	0.414068	9.32341782914893e-05
TBXAS1	0.414294	0.0247782
TFE3	0.414651	0.00323429
SDF2	0.414806	0.00173902
UBE2L3	0.414823	6.89839449885254e-05
RPS6	0.414939	0.00659517
TOMM6	0.414951	0.00742486
UBC	0.415312	0.0124007
PPIB	0.415318	0.000419845
B4GALT3	0.415445	0.00178947
PRPF19	0.415478	9.70760161012252e-06
ECHS1	0.4155	0.00537524
CHCHD1	0.415739	0.0160216
CRELD1	0.415854	0.000358736
MRPL49	0.415884	7.3442259054385e-07
TGFB1	0.416163	0.00149544
NOC4L	0.416415	0.0057926
MGST3	0.416683	0.00184431
SLC3A2	0.416749	0.000113418
LOC122420265	0.416855	0.0224536
PI4KA	0.416879	0.0316807
RPLP0	0.41721	0.0092867
TSPAN31	0.417221	0.00212907
PANK4	0.41724	0.00160385
METTL13	0.417308	0.00508798
LOC122440232	0.417394	0.0488973
ORMDL2	0.41744	0.000191898
CCND3	0.41811	0.00300943
CTDP1	0.41837	0.000208563
SH2B1	0.418628	0.00710444
MAF1	0.418998	0.000135383
SGSH	0.419088	0.029186
TLN2	0.419292	0.0168149
MAST3	0.419504	0.00625129
PEX11B	0.419518	0.000954619
CDKN2C	0.419562	0.0416698
C13H1orf159	0.419876	0.00943639
FARS2	0.41995	0.001091
GADD45GIP1	0.42001	0.00269203
SNRNP70	0.420082	0.00123675
ATXN7L2	0.420417	0.0109018
CLPTM1	0.420611	0.00413795
ASNS	0.420671	0.00239654
COMMD1	0.420698	0.00633752
ANKLE1	0.420812	0.02844
ATP5F1C	0.420898	3.37812647056132e-06
STING1	0.420961	0.00012214
STX10	0.421052	0.00213768
TMEM256	0.421189	0.0482645
GRAP2	0.421198	0.00700081
DDIT3	0.421513	0.030293
TNKS1BP1	0.421626	0.0274421
ACBD6	0.421745	0.00662238
AMPD2	0.421826	0.00344293
ITFG2	0.422373	0.0147694
XKR8	0.422477	0.028822
RPL29	0.4225	0.01634
TPCN1	0.422932	0.00337317
CLTA	0.423078	2.93697975156161e-05
PLEKHG2	0.423331	0.0104499
SLC35B1	0.423722	0.00127878
MICAL1	0.424292	0.00790886
FCSK	0.424594	0.0336126
SERHL2	0.424648	0.0118323
TMOD4	0.425149	0.0106407
ZBTB17	0.425181	0.000821875
CETN2	0.425239	0.0228948
CIZ1	0.425257	0.00262817
INO80E	0.425387	0.000589448
SLC35C1	0.425554	0.0119019
TWF2	0.42557	0.000972941
RNASEH1	0.425873	0.00161035
OAZ2	0.426111	0.00732063
PEX14	0.426208	0.00064925
CERK	0.426227	0.000590282
ARHGAP27	0.426401	0.00595848
TRAPPC3	0.426907	0.000265631
RRP9	0.427146	0.013272
SOX13	0.427431	0.0434236
RHOF	0.427814	0.0110187
CALML4	0.42792	0.0216486
CDAN1	0.427965	0.00205116
PSMB6	0.427996	0.0303421
TYSND1	0.42808	0.00100806
TFIP11	0.428205	0.000204829
GRPEL1	0.428364	1.66986549828872e-06
CTBP1	0.428428	1.79853331782152e-05
FBXO31	0.428777	0.00483792
CD68	0.429003	0.00225849
LOC122454552	0.429036	0.000622647
MRPL20	0.429068	6.38318729403145e-05
SRI	0.429313	0.00451954
CCNB2	0.429362	0.0261306
RPS19	0.429437	0.0201428
LOC122447904	0.429452	2.65156923801197e-05
ATF5	0.429548	0.0106279
TCF19	0.429553	0.00656163
SERTAD1	0.4296	0.0211424
RASGEF1A	0.429933	0.0173294
SLC39A1	0.430294	0.0040148
FBXW4	0.430567	0.00782233
DTX4	0.430831	0.0277955
POLE	0.43085	0.00602452
COPZ1	0.430989	0.000304096
DELE1	0.431177	2.24962393632848e-05
CHCHD2	0.431259	1.90845023812412e-05
ATP5PF	0.431437	0.00219379
SPRYD4	0.431651	0.00579149
ARAP1	0.431653	0.0339615
RASSF1	0.431662	0.00288751
AGPAT1	0.432233	0.00199461
TMEM18	0.432319	0.00153438
PMM2	0.432533	5.66243444540028e-07
ICOSLG	0.432583	0.00963012
LOC122439037	0.43267	0.0301221
LOC122433036	0.43283	0.00739146
LTB4R	0.432952	0.0252544
NUCB1	0.433055	7.4478612955804e-06
CMC2	0.43336	0.004218
SLC25A6	0.433417	0.00203158
LCK	0.433781	0.0121399
VAMP2	0.43396	0.00809571
RNF185	0.434169	0.00125244
PSMA6	0.434178	0.0341867
RPLP2	0.434254	0.0290638
GNL1	0.434449	0.000276046
LOC122434704	0.43448	0.00146059
FEM1A	0.434536	0.00412768
CSKMT	0.434606	0.0140644
SNX11	0.434688	0.00249637
ING4	0.43507	0.00019026
TRIM28	0.435406	0.000471802
QARS1	0.43556	0.000183207
AP1M1	0.435775	8.17629100096028e-05
ADAMTSL4	0.436117	0.0462819
GPR18	0.436261	0.00166351
TMUB2	0.43628	0.00353637
PCOLCE	0.436376	0.00160444
KCNAB2	0.436395	0.000226131
E2F2	0.437005	0.000228306
VAT1	0.437014	0.0018672
DUT	0.437205	0.025887
DTX3	0.437357	0.00630025
ISY1	0.437428	0.0086746
ANP32B	0.437521	0.00959383
DPH2	0.43771	0.00332927
CRTC2	0.437756	0.00665553
GPR108	0.437785	0.00156719
MAPK8IP2	0.437994	0.0290638
VPS37B	0.43828	0.000130854
LOC122433203	0.43844	0.00938631
ARFGAP2	0.438646	9.10829955229175e-06
LOC122454861	0.439164	0.0109635
RBM10	0.439214	4.82107115299369e-05
RDH13	0.439355	0.0148471
ABHD12	0.43937	0.0168289
MYO1F	0.439549	0.0115254
C18H19orf12	0.439563	0.00136027
DPP3	0.43965	0.00531168
TMX2	0.439781	6.69594128238834e-05
LOC122429824	0.439784	0.0381622
LOC122420775	0.439931	0.0153313
SLC46A1	0.44003	0.023467
FAM89B	0.440102	0.00398032
LRSAM1	0.440213	0.00683762
LSM10	0.440343	0.00219996
ENTPD6	0.440471	0.0112041
LDOC1	0.440855	0.0315894
MAP2K7	0.441036	9.20068318580122e-06
SWI5	0.441118	0.0151689
NUAK2	0.441245	0.00516193
KCTD13	0.441329	0.000234123
SH3BP5L	0.441365	0.000352551
METTL17	0.441498	0.0108129
STAT6	0.441799	0.00144561
C32H7orf26	0.442115	0.000662667
LAMP1	0.442223	0.00139034
PPP1R11	0.442227	1.68754546840339e-05
SYMPK	0.442235	0.000465955
RRP7A	0.442455	0.0170791
AKT1	0.442513	0.00278334
ZSCAN2	0.442555	0.00573375
PTRHD1	0.442629	0.0010124
RNF166	0.442757	0.000155399
HCK	0.443236	0.0482621
LOC122439035	0.443357	0.0147
BTBD6	0.443772	0.00127647
LOC122433931	0.443786	0.0253316
MUTYH	0.444055	0.00793909
COMMD7	0.44408	6.22086299822631e-06
IPO13	0.444175	0.00137994
CEP250	0.444425	0.000121502
DEXI	0.444508	0.00318566
ZNF282	0.444524	9.10487642416533e-05
PPP1R14B	0.444821	0.000547603
DHX30	0.444849	0.00166155
CD63	0.445203	0.0103262
TMEM106A	0.445296	0.00988692
LIG1	0.445383	0.000314671
KLHL26	0.445396	0.0480493
STX4	0.445423	0.000164367
EIF3D	0.445631	4.06832706038993e-06
MGAT4B	0.445736	0.00272035
TMEM127	0.445765	0.00999227
CLIP2	0.445956	0.00164505
ZBTB48	0.445974	0.00418695
GRIPAP1	0.44598	0.00549086
GNB2	0.446227	0.000783119
LOC122450370	0.446399	0.00170635
CDK2AP2	0.447019	0.000782391
MRPS7	0.447328	0.003942
PER1	0.447482	0.0213953
GRWD1	0.447748	0.000186605
MRPL13	0.447806	0.022415
ECH1	0.447941	0.00131177
MARVELD1	0.447947	0.00360597
LOC122421341	0.448015	0.0156514
C1H12orf76	0.448218	0.0175488
IPO9	0.448868	0.000905291
RELB	0.449018	0.00170635
CASP1	0.449032	0.0281128
TMEM205	0.449123	0.0121383
TRAPPC12	0.449188	0.00225019
SNRPN	0.449319	0.0113043
UBE2C	0.449486	0.00578976
ABHD16A	0.449536	0.000176761
CDC26	0.449646	0.008395
PIP4P1	0.450304	8.97947802843324e-05
CD79A	0.450439	0.000445163
LOC122432984	0.450441	0.00855581
MAZ	0.450459	0.000116479
TRMT44	0.450534	0.000423822
LOC122450133	0.450846	0.00012214
BTN3A3	0.45089	8.29602708778918e-05
LOC122421157	0.45107	0.00474232
HIRIP3	0.45126	0.000270376
C2CD2L	0.45141	0.00790886
YKT6	0.451458	3.88975228182514e-05
TRAP1	0.451809	0.000884317
EIF2B2	0.451831	2.25944327121047e-05
SEC13	0.45226	4.31104125832682e-05
USF2	0.452414	2.90709966641244e-06
RPL4	0.452491	0.04498
HAUS4	0.452576	2.90726205671681e-05
GRN	0.452869	0.0179839
PFKL	0.453342	8.1119405948487e-05
RCC1L	0.453423	6.02429117624313e-05
ZMIZ2	0.45348	0.00695534
ELAC2	0.453481	1.98723566637129e-05
DMAC1	0.453531	0.0315438
ZNF692	0.453537	0.00158838
PDAP1	0.45365	8.30294965878968e-08
ETHE1	0.453682	0.0437372
RPS10	0.453785	0.000102562
IL12RB1	0.453837	0.000441088
ARAF	0.453941	7.55984477240445e-05
CTSA	0.453972	0.000491149
TRIM41	0.454291	3.08479597619735e-05
LOC122446364	0.454313	1.39664986159275e-06
BRK1	0.454454	8.38947518419396e-06
LRWD1	0.454627	0.000223194
ABCD4	0.454679	0.00584424
ASB13	0.454694	0.0143329
LOC122442403	0.454704	0.0193783
WAS	0.454719	0.000903467
SLC6A9	0.455122	0.0397618
SDHAF2	0.455232	5.99794876699933e-05
ABCF1	0.455413	9.65451397420962e-05
WDR74	0.455456	0.000931637
PLSCR3	0.455544	0.0011671
HTRA2	0.455685	0.000386248
CPSF4	0.455774	0.000412019
ZNF3	0.455832	0.000388006
TMC8	0.456391	0.00416429
NT5C3B	0.456642	0.00147241
TMEM150B	0.456651	0.0462905
LGR6	0.456683	0.0412512
SLC26A6	0.456686	0.0147626
VIPAS39	0.457132	3.5437126883116e-05
CARS1	0.457472	0.00216135
IRF5	0.457543	0.00812501
NME2	0.457749	3.75417167695853e-05
PHKG2	0.457917	0.013388
IMPDH1	0.458086	8.9578560280054e-05
WIZ	0.458269	0.00735606
ALDH16A1	0.458647	0.000104767
ZBTB47	0.458965	0.00392669
LOC122445585	0.459015	0.0401021
DDX39A	0.459151	0.00848315
CD3E	0.459179	0.00552859
CEP131	0.459507	0.00631034
MXD4	0.459529	0.00154868
STK19	0.459869	0.000530592
APBA3	0.459917	0.00758236
PINK1	0.459938	0.00566517
KIAA2013	0.460654	0.00100836
SDHAF1	0.460991	0.00385227
LOC122436914	0.461026	0.0113236
WDR13	0.46113	0.00695707
LOC122433554	0.46127	0.000931131
SLC27A4	0.461592	0.00778182
PRMT1	0.461739	3.74024662954511e-06
SART1	0.461741	3.06533606003586e-05
ACADVL	0.462157	7.44484609790257e-06
IGFLR1	0.462236	0.0252144
TSC2	0.462262	0.00234334
WDR55	0.462275	1.59125698743031e-05
STOML2	0.462675	8.40126984854465e-07
TRAF7	0.462725	0.00203536
EXOSC6	0.462807	0.0279373
LOC122437075	0.462949	0.00499589
DNAJC30	0.462995	0.015408
HEXD	0.463213	0.00708053
PNPLA6	0.463266	0.00299728
ENTPD2	0.4635	0.0454507
ELP5	0.46382	0.000292296
GCDH	0.46405	6.80757038127854e-05
SCAMP3	0.464182	1.88324767673643e-05
EIF4A1	0.464248	6.75654394654588e-07
DBI	0.464328	0.0377149
MICOS10	0.464382	6.97874799365777e-05
PFDN1	0.464397	0.0321693
CSK	0.464556	0.000425195
ZNF853	0.464707	0.00811034
CRELD2	0.464813	0.000466732
ARHGDIA	0.464866	3.3156538157884e-07
AXIN1	0.464871	0.000871448
TMSB10	0.464915	3.1772440462749e-06
CDCA4	0.465275	0.0158386
RANBP1	0.465404	8.44423808526739e-06
COG4	0.465444	6.72260885537453e-05
SSU72	0.465565	0.000156499
CIITA	0.465665	0.00914786
SYS1	0.465911	0.000148702
SRRD	0.46609	0.00177273
PSMF1	0.466248	0.000623494
MDH2	0.466266	5.38594466229162e-05
PCK2	0.466312	0.00213662
NKIRAS2	0.466376	7.70460851679396e-05
SLC17A9	0.466415	0.0322455
PPIE	0.466684	0.000178503
ACTN3	0.466796	0.014045
ESRRA	0.467258	0.0040695
FGD3	0.467387	0.0013304
FBXO6	0.467554	0.000199489
SF3A2	0.467773	2.12870587584035e-05
TRAF3IP3	0.468065	4.41815497221732e-07
NDUFS2	0.468167	1.4257486094214e-05
PSMB4	0.468453	5.461596936836e-05
CIAO2B	0.468489	0.000725713
UCKL1	0.468831	0.00818017
AP1M2	0.468936	0.0209927
ALDOA	0.469035	0.00417434
OGG1	0.469203	0.000123997
LOC122439038	0.469214	0.0376694
XPC	0.469291	0.000467329
SLC13A3	0.469446	0.0139266
BRF2	0.469722	0.000467829
PTDSS2	0.469755	0.0255337
DTNB	0.46979	3.80592284819596e-05
ZNF362	0.46991	0.000642626
RPS9	0.470101	0.000114427
ACSF2	0.470589	0.000335011
PIP5K1C	0.470742	0.00624961
CARD11	0.470904	1.16016119233644e-05
NAXE	0.470958	7.58772509993476e-05
ABCD1	0.471245	0.00327356
EMD	0.471325	0.000156651
PDCD5	0.471542	0.00418695
C21H12orf57	0.471555	0.0147812
DHX34	0.471571	0.0106965
PHB	0.471624	0.000230753
FPGS	0.471852	0.0150492
TSEN34	0.472116	0.00146203
CIC	0.47222	0.0117227
CAPNS1	0.472497	7.68773320965375e-08
LOC122422583	0.472641	0.00901259
RORC	0.472681	0.0371621
CHST10	0.472799	1.28507278415612e-05
BUD23	0.472858	2.41178842102413e-08
TJAP1	0.472931	0.00142267
TOMM40	0.473451	0.000977034
SPR	0.473466	0.0480103
EIF3I	0.47358	1.5148200471664e-06
ERGIC3	0.473671	3.8263297566263e-06
LOC122426673	0.47378	0.000927628
SLC25A38	0.473822	0.000178042
DDA1	0.473856	0.000204785
LOC122429717	0.473908	0.0165139
ARF5	0.474282	0.0032962
RPS18	0.47434	0.00071101
KLC2	0.474395	0.0156474
ZNRD2	0.474477	0.00392258
CEBPA	0.47454	0.0133129
TBC1D10B	0.474753	0.000838065
SPNS1	0.474787	0.00448191
RPL28	0.474903	0.00465314
SLC52A2	0.474913	0.00272452
ACOT7	0.475036	0.0040321
RNF220	0.475082	1.14905955082298e-05
PYGB	0.475165	0.00578986
CPPED1	0.475181	0.00610891
PPP6R1	0.475221	0.0018789
WIPI2	0.475599	1.9525793944467e-05
MYG1	0.475806	1.31952304841482e-05
WDR81	0.476119	0.000559311
TRIR	0.476253	7.12208355095361e-06
LRG1	0.47629	0.00887449
FOXP3	0.476412	0.00636201
COG1	0.47647	0.0029349
ABCA2	0.476696	0.00797281
LOC122421171	0.476773	0.0082597
RXRA	0.476939	0.00499608
LOC122447186	0.4771	0.00875015
GIGYF1	0.477152	0.00744111
JAML	0.477157	0.00202443
CENPT	0.477499	0.0361226
MKS1	0.477964	0.0236609
PAOX	0.478036	0.00190223
TALDO1	0.478072	0.00230852
AAR2	0.478149	0.0002566
HM13	0.478303	0.000470119
SFI1	0.47872	0.0066867
KRTCAP3	0.479102	0.0384892
LAT2	0.479224	0.0102074
WWOX	0.479385	0.00149001
LOC122455209	0.479615	0.0200874
LOC122453182	0.479698	0.0299421
HDAC7	0.479822	0.00365722
TUFM	0.479983	1.45783104457726e-05
ALAD	0.480566	0.00143242
HEXA	0.480651	0.0113664
TSPAN17	0.480765	0.000194298
LOC122445907	0.480942	0.00649337
AQP9	0.481164	0.028704
MALSU1	0.481201	0.00577075
SNRPB	0.481272	5.18943424501186e-05
NME6	0.481315	0.00892394
DCAKD	0.48133	0.00244126
MCM2	0.481496	0.00191137
PSMA5	0.481627	3.04627534314659e-05
LOC122437839	0.481745	5.46075324739112e-05
HGS	0.481805	0.00415799
MED25	0.481854	0.00241136
PRKAG1	0.481875	0.000280997
ANAPC15	0.48207	5.89030835541733e-06
CTDSP1	0.482126	0.000470552
SUSD3	0.482289	0.00572718
PSMC4	0.48233	5.96349101774975e-07
LXN	0.482957	0.0298931
MTHFSD	0.482976	0.0015442
NOD1	0.483369	0.0136067
LAPTM5	0.483584	4.13118869793577e-06
ELOF1	0.483672	0.000656255
BRD9	0.483703	6.76949442851228e-06
NLRX1	0.483704	0.0401821
LOC122432874	0.483784	0.0222844
SERGEF	0.483978	0.00112021
EIF3H	0.484025	0.000662667
RNF157	0.484054	0.000412732
TEX261	0.484275	0.000135446
JAK3	0.484436	0.00324735
NDUFA2	0.484712	0.00440092
NEIL2	0.484773	0.00905659
ZFYVE27	0.484778	0.00028372
DBNL	0.484897	7.10286075790975e-05
TAF6L	0.484904	0.000516838
TRPV2	0.485099	0.0186412
CREB3	0.485579	4.50421188901405e-05
WBP2	0.485969	0.00191461
ZSWIM1	0.485973	0.0106424
GTF2F1	0.486106	1.47243137115227e-06
RPS17	0.486572	7.39922982007581e-06
VKORC1	0.486679	0.0328471
RPL27A	0.486931	1.40660374160629e-06
TNFSF14	0.487267	0.000126729
GSS	0.487349	0.00646425
ANKRD39	0.487737	0.0396414
RABEPK	0.487806	3.92843194555233e-05
FTH1	0.487983	0.00319008
BEND5	0.488009	0.0317662
MBD6	0.488153	0.014508
PRR14	0.488211	0.0023015
LOC122431641	0.48823	0.0124316
RUVBL2	0.488756	0.000200641
ZNF835	0.488826	0.0101431
MAPK3	0.488863	0.00197821
PLEKHA4	0.48919	0.00708578
FGR	0.489414	0.00557729
RPL7A	0.489447	4.57730639495761e-05
KLF16	0.489795	2.07172677999232e-07
ARSA	0.489811	0.000419228
MUS81	0.48992	0.000412709
NDUFB4	0.490032	0.000246579
TNFSF12	0.490113	0.00126652
WDR6	0.490736	0.00535838
GINS4	0.490829	0.00805785
ATP5MG	0.491289	0.000953508
ARHGAP4	0.491302	0.000174417
NSMCE1	0.491313	9.41892476788396e-05
MTHFR	0.491661	0.00180208
BANF1	0.492169	1.36446232026494e-05
LOC122443313	0.492364	0.00163061
MED15	0.492379	0.0132788
LIPE	0.492443	0.0298029
MRPL36	0.492539	0.0444486
RAB8A	0.492551	1.43721969058006e-06
TBC1D22A	0.49277	0.000720623
RIPK3	0.492828	0.00170052
ATG9A	0.492917	0.0019841
POLG	0.493119	0.00016863
TRMT1	0.493213	0.000143903
RTF2	0.493249	1.30014734430249e-05
CDH23	0.493598	0.0259744
HEBP1	0.493847	0.0371625
LAMTOR5	0.493857	0.0140446
CCNF	0.493887	0.000269384
MON1A	0.494117	0.00557889
WRAP53	0.494365	0.000200816
SYN1	0.494616	0.00221494
GAK	0.494698	0.000346735
RRBP1	0.494709	5.40899571603439e-05
PES1	0.494869	0.000206155
NSFL1C	0.494933	7.42827317696848e-08
UBE2M	0.49505	7.01359328813178e-06
LYL1	0.495466	0.00665642
UBAC1	0.495836	1.08032068600449e-06
PRKCZ	0.495904	0.00111679
CAPN15	0.496012	0.0073398
GRK6	0.496294	0.00351644
BAP1	0.4965	2.18606931152766e-05
DDAH2	0.496589	0.00327006
CRTC1	0.496622	0.00300004
LOC122435198	0.49691	0.0131496
ADSL	0.496955	0.000829438
ARHGDIB	0.497195	4.63972028383879e-08
SLC37A1	0.497933	0.00787542
CDC37	0.497962	3.0472399874597e-09
KLHDC3	0.497969	2.40586277402215e-05
LOC122451979	0.497971	0.0178476
NDUFA8	0.498099	9.18938162982371e-07
RPL13	0.498111	0.00509489
MRPL21	0.498607	0.0145149
FAU	0.49863	2.1319106819164e-06
ELOVL1	0.498646	8.75567989516106e-06
PCBP4	0.498674	0.00225932
LTB	0.498721	0.000551613
IL21R	0.498755	0.0179616
PTPA	0.499201	0.00020084
MAP3K14	0.499517	0.00373135
FAM53B	0.499521	0.00021799
JTB	0.499934	7.77383005592367e-05
EIF3G	0.500185	4.91637661311671e-05
LOC122425079	0.500262	0.0156383
E4F1	0.500335	0.00106096
PLEC	0.500356	0.0068934
TMEM95	0.500363	0.00901259
FAM193B	0.500652	0.00589544
CHTF8	0.500726	0.0218959
HILPDA	0.500772	0.0412278
CMTM7	0.500982	0.0011214
C1H17orf49	0.500982	0.000290721
PHC2	0.501084	4.8497933038983e-05
LOC122423384	0.501333	0.0132092
RPL31	0.501363	0.000534728
SLC27A1	0.501421	0.00880291
PARVG	0.502146	0.00439011
MRPL58	0.502168	2.91528693158157e-05
IER3	0.502365	0.00255422
AURKB	0.502607	0.0086746
SASH3	0.50282	8.92305184567222e-08
RUFY4	0.502862	0.0261239
DDX11	0.502949	0.00687583
KRI1	0.503083	4.23411646268576e-07
DOK1	0.503231	0.000187797
JAGN1	0.503581	3.5437126883116e-05
SPAG7	0.503753	3.86115956720379e-06
AGAP3	0.503769	0.0090231
SMARCB1	0.503868	3.99334481203188e-06
ULK3	0.50387	0.00103538
DUSP22	0.503948	0.0349528
RASAL3	0.503972	0.00110301
ZNF526	0.504274	0.002088
PROCA1	0.504378	0.00299908
LOC122449580	0.504827	0.0286491
PKD1	0.504959	0.0179383
OPRL1	0.504977	0.0330334
B4GALT2	0.505052	0.0149423
POLD2	0.505149	0.000183723
RPL18A	0.50549	0.000239302
TIMM50	0.505605	1.65692115930357e-06
RAB11B	0.505681	2.86310380212454e-05
NCDN	0.505753	0.00145623
TXN2	0.505815	0.000554357
EMC6	0.505819	0.000823969
AMZ2	0.50583	2.02583746018152e-05
LOC122439933	0.50596	0.00239375
BABAM1	0.506137	1.24567298752953e-09
KAT8	0.506145	2.08420072984453e-06
FAM189B	0.506228	0.0200161
LOC122421203	0.506661	0.00528411
ZNF142	0.506706	0.00136185
GIMAP6	0.506737	0.0071264
POLR3H	0.506879	0.00267768
CCDC51	0.507186	0.00350067
SURF6	0.507317	0.00500307
LOC122440783	0.507324	0.0113687
CMKLR1	0.507525	0.0182167
SGTA	0.507728	8.31112990205071e-05
PLEKHO2	0.50789	0.00171126
NME1	0.507934	6.03484602047582e-05
LOC122448017	0.508005	0.0430724
RNF167	0.508018	0.000867909
DNAJC17	0.508018	0.0036302
HEMK1	0.508227	0.00025601
ZNF48	0.508229	6.87841906172009e-06
DMAC2	0.508426	1.16384997001323e-05
PRICKLE3	0.508622	0.0119553
LZTS2	0.508638	0.0407593
WARS1	0.508695	0.00157106
GMPR2	0.508722	2.70793794513685e-05
CDK4	0.508807	1.66918998228497e-05
MAPK8IP3	0.508813	0.00616842
RIC8A	0.508924	2.0209560984905e-05
STRADA	0.509038	1.85377515386262e-05
NFKB2	0.50904	0.0230397
MED19	0.509076	3.51986015643683e-05
MTRFR	0.509136	0.0033554
FRMD8	0.509249	1.54537319047523e-05
SGSM2	0.509516	0.0167139
MRPL10	0.509703	0.00118404
CSF3R	0.509749	0.00974866
OXA1L	0.509769	0.00046166
TCEA2	0.50994	0.00443711
APTX	0.510306	0.00018415
POLR2F	0.510549	6.62861456807294e-06
GMDS	0.510616	0.000118461
TAB1	0.510621	0.000183704
TTYH2	0.510636	0.00867817
PSMC5	0.510886	2.40296665903659e-08
SAC3D1	0.511025	0.020678
TRAF2	0.51105	0.00577075
CACNA1A	0.511601	0.00720208
LOC122429783	0.511646	0.0461208
SCRIB	0.51166	0.00327082
XAB2	0.511678	8.75506030099485e-06
LOC122426744	0.511712	1.20367426945167e-08
SPRYD3	0.511799	0.00115499
FLYWCH1	0.511848	0.0022235
DAD1	0.511888	1.06595615651664e-07
DCXR	0.51207	0.00243339
DCAF11	0.512094	0.000319139
AP1S1	0.512199	1.08354233267491e-05
RANGAP1	0.51223	6.68528401830195e-06
TREM2	0.512374	0.0262888
LOC122448780	0.512479	0.00054499
MEN1	0.512609	0.00163178
MGRN1	0.512916	0.00058165
CTC1	0.513061	0.000241558
TNFRSF13C	0.513344	0.0286523
C10H20orf27	0.513408	0.00404619
LOC122426789	0.513526	0.022827
TOR2A	0.513784	0.00113307
CCDC163	0.513828	0.00798333
LENG1	0.513837	5.1079796756901e-05
DMWD	0.513966	0.0150408
GPATCH3	0.514202	0.000169477
AARS2	0.514286	0.00136455
CNPPD1	0.514825	3.86549943627721e-05
HCAR2	0.51502	0.00609377
PLEKHJ1	0.515147	3.42710642475829e-05
ATF6B	0.515501	0.000104855
ORAI1	0.515688	0.00172804
CD74	0.516211	1.68986914773618e-05
ZXDC	0.516579	0.00382936
NEURL1	0.516686	0.0131
SNF8	0.516699	1.46179028231415e-05
E2F1	0.516787	0.000195552
LOC122449544	0.516915	0.0260979
PSMG3	0.51695	1.96960383093037e-05
SLC66A1	0.516978	0.0148154
SPEG	0.517146	0.00486427
C1H22orf39	0.517201	0.00164676
GABBR1	0.517386	0.0133364
NDUFB1	0.517551	0.0154159
TCEAL8	0.51756	0.00097793
ARRDC2	0.517735	1.49270121251271e-06
ATG4D	0.517764	0.00163061
TKFC	0.517779	0.000332231
SMPD4	0.517815	0.00241455
KIFC1	0.517999	0.000109807
ZDHHC8	0.518091	0.00446549
TFEB	0.518111	0.00318656
PLD3	0.518367	0.00397655
SORBS3	0.518468	0.0293261
LRRC51	0.518522	0.0122362
XAF1	0.518549	5.1079796756901e-05
WDR45	0.518571	0.00127473
JMJD7	0.518876	0.00519192
JRK	0.518903	0.000597938
TNFAIP8L1	0.519114	0.000346927
TSEN54	0.519216	0.00167584
LOC122445521	0.519232	0.0395924
PDK2	0.5193	0.00010376
SMG5	0.519342	0.000432363
INTS5	0.519436	0.00507581
C12H8orf82	0.519484	0.000154631
NCKAP5L	0.51979	0.0016419
CORO1B	0.519889	0.00264242
PPM1F	0.520055	0.0032262
RPS6KA1	0.520132	0.00164008
MAP4K1	0.520373	4.06218673073206e-06
ADRB2	0.520648	0.0199813
RUSF1	0.520677	0.026855
CTSH	0.520814	0.00576152
SRA1	0.521096	1.31542769763633e-05
RNF26	0.521235	0.00175403
GPER1	0.521304	0.00865544
MLF2	0.521482	1.09811259373722e-07
DHPS	0.521594	1.41739473359095e-05
ATG101	0.521664	0.000116451
CCM2	0.521868	0.000128454
COPS7A	0.522577	8.53714128853712e-06
LRPAP1	0.522637	0.000436342
RING1	0.522674	5.61570193221554e-06
MAST2	0.522998	0.00299728
SNRPA	0.523654	7.49203507125179e-05
TNFRSF1A	0.523723	0.0114687
DYRK1B	0.523734	3.47394925323212e-07
IDH3B	0.523747	9.77360558407848e-09
PGAP2	0.52387	0.00617668
PREB	0.524173	0.000253746
SQOR	0.524464	0.0072984
DDX28	0.524495	0.00452219
IL17RA	0.52451	1.12127753411742e-05
NAGPA	0.524517	0.00364113
LOC122441498	0.524607	6.50816611590991e-06
PPP6R2	0.524798	0.000608483
NEURL4	0.524935	0.00144031
IL10RB	0.525178	0.000504538
RPS11	0.525274	0.000326142
FCHSD1	0.525332	0.00182249
HAGH	0.525487	7.63505578208054e-05
PACS1	0.525951	0.000233378
IGHMBP2	0.526121	0.0109114
BCL2L13	0.526266	3.88387292997052e-06
ASAP3	0.52692	0.0396582
PRR3	0.527237	0.000200903
GMFG	0.527518	5.56975151033896e-05
DDX51	0.527583	0.000268886
CCDC71	0.527776	0.00020032
LOC122426554	0.527838	0.00263915
MARK4	0.52823	0.000151839
RPL10A	0.528304	0.0119506
ZNF777	0.528334	0.00146102
SPI1	0.528994	0.0097826
ZBTB32	0.529047	0.0249066
PPIL2	0.529109	3.39769519126105e-05
ZBTB22	0.529235	0.00108459
WDR46	0.529493	3.06017637163637e-06
GPR25	0.529579	0.0126263
PHOSPHO1	0.529753	0.0348645
CSNK2B	0.529765	3.70439979418171e-05
UBL4A	0.529935	0.000158478
LOC122420599	0.52995	0.0288763
BCKDK	0.529973	0.000124993
TMEM25	0.530019	0.00277661
CTNS	0.530043	0.000207607
PGS1	0.530192	0.0257207
DUS1L	0.530517	7.67791952663336e-08
PSME2	0.530576	8.98458678460884e-09
FTL	0.530762	0.000523613
GMEB2	0.531074	9.41593920803279e-05
CYTH2	0.531079	0.000101294
SIRT3	0.531157	0.00326922
CRYBG2	0.531355	0.00133764
MCAT	0.531455	0.00192226
QTRT1	0.531522	0.00012214
LOC122452924	0.531574	0.0444283
PAQR4	0.531603	0.0339518
GTF2H4	0.531681	1.30565664348836e-05
BEX3	0.531732	0.000868075
LOC122424900	0.531946	0.00904071
PSMC1	0.532147	2.89019105167807e-07
DHODH	0.532397	0.00186018
NDUFS3	0.532398	3.20466223622485e-06
TMEM42	0.532543	0.0159793
LOC122424269	0.532587	0.000281986
MRTFA	0.532715	0.00024122
C4H19orf53	0.532774	2.84238709229758e-05
EMC10	0.532881	1.8134265055239e-06
TAFAZZIN	0.533028	0.00231488
CD3D	0.533079	0.00041539
ANKRD13D	0.533087	0.00612801
AP5S1	0.533298	0.000193948
MYO1G	0.533305	2.08149994635141e-05
MRPL4	0.533414	0.000253746
DOLK	0.533595	0.00769087
LOC122422557	0.533749	1.64798325419678e-05
TESC	0.53389	6.06322411991037e-05
LOC122451955	0.534245	0.00180876
LOC122447113	0.534327	0.0305239
LOC122430223	0.534401	0.0305097
POLR2G	0.534713	0.0022264
LOC122426637	0.535006	0.0229195
MMP25	0.535125	0.0269977
LOC122421476	0.535129	3.2379658675931e-06
SCAMP4	0.535186	0.000889749
LOC122445545	0.535467	0.00487697
LOC122438892	0.535593	6.98062710378179e-06
BIN1	0.53561	8.44423808526739e-06
LOC122423382	0.535633	0.000811944
ERCC1	0.535676	0.000700517
PAQR7	0.535784	0.00971059
SLC9A8	0.535904	0.00149774
CHCHD5	0.536223	0.000226273
WNK4	0.536312	0.0179831
LTA	0.536419	0.000509711
RMND5B	0.536443	8.01606830499681e-05
LOC122427509	0.536487	0.00714401
SLC37A2	0.536825	0.0031656
QDPR	0.536891	5.30186456269222e-07
MRPS6	0.536895	0.0207242
DNASE1L1	0.536954	0.00725755
VPS4A	0.537224	4.74732415543081e-08
TBC1D2	0.537638	0.0231028
LOC122448642	0.537698	0.0209374
PRELID1	0.537747	1.15180047638674e-06
C4H1orf35	0.537905	0.000295488
RALY	0.538108	1.58840400139259e-08
ATP5PD	0.538126	0.00278781
DDRGK1	0.538267	5.42701237826922e-08
ZER1	0.53846	5.45872182590606e-06
LOC122426882	0.538474	0.0268368
BTBD2	0.538575	8.57810016148335e-05
RPL35A	0.538683	1.31241894512239e-07
PSMB2	0.538691	2.1421436724078e-08
MPND	0.538909	1.53960652800834e-05
SCRN2	0.538967	0.000646703
PDZD11	0.539083	4.02651123759083e-05
SLC35B2	0.539321	0.000121539
ITPK1	0.539602	6.34861064146575e-05
LDLRAP1	0.539657	0.000523046
MZT2B	0.539666	0.0197194
BUD31	0.540035	3.68243847162289e-05
LOC122429972	0.540035	0.00110502
ITGB7	0.54004	0.000653551
LOC122440583	0.540191	6.54817938597514e-05
SLC7A7	0.540412	0.0176611
INPP5K	0.540762	1.1242236413071e-05
MAD1L1	0.540813	0.000893906
TOP3A	0.540852	8.93002667747528e-05
LOC122432541	0.541145	0.00526204
TARS2	0.541326	2.71667416180232e-06
AEBP1	0.541425	0.00731974
SLC39A7	0.542004	1.12866230682254e-08
SPATA24	0.542036	0.00202575
LOC122419788	0.542185	1.2088397768635e-05
LOC122448193	0.542411	4.85141232858975e-06
RPS25	0.542676	0.00452022
ZYX	0.542956	0.00496786
MRPL55	0.543011	0.00281959
PHF1	0.543072	0.00015415
LOC122437264	0.543097	0.02568
BCL7C	0.54322	7.61223863764716e-05
PQBP1	0.543283	1.58577466126197e-07
ST6GALNAC2	0.543601	0.026728
MCM7	0.543882	2.20379458252744e-07
CLN8	0.54418	0.000357447
LOC122447928	0.54431	8.94936705180987e-05
ADRM1	0.544335	1.20115437737749e-06
ZC3H3	0.544366	0.000233206
NUDC	0.544591	3.78779601049187e-08
ELMO3	0.544748	0.0141327
TMEM63A	0.545005	6.66390447991191e-05
PUS1	0.545342	4.06441146895452e-05
CTU2	0.545675	1.49600320833001e-05
SFXN3	0.545841	0.00719436
DUS2	0.545857	0.000326348
PTOV1	0.54586	0.00241145
LOC122446062	0.545981	0.000119803
PPP2R5B	0.54602	9.61995208512249e-05
SPTBN5	0.546109	0.0181485
DCAF15	0.54623	2.65256756161062e-05
RPL36	0.54627	0.00278128
BCAS4	0.546274	0.0134994
LOC122455145	0.546362	0.0105109
PELP1	0.546575	2.55168730797677e-06
PSMB7	0.546582	1.13059645679083e-05
PLEKHG3	0.54671	0.0184425
RPL11	0.54722	2.99744238796552e-07
NFKBIE	0.547323	0.000445919
PTCD1	0.547434	4.7565449983643e-05
LOC122439288	0.547436	3.92724535341634e-06
TMEM187	0.547447	0.000195618
LOC122439050	0.547534	0.0124721
CDIP1	0.547803	0.000547603
IMPA2	0.547853	0.000116332
FAM20C	0.547911	0.00535698
ITGA5	0.547973	0.0165139
LOC122439026	0.547987	0.00795183
ATP13A1	0.548003	0.000232365
BAD	0.548063	0.00374863
MOGS	0.548427	0.00032264
KIF1C	0.548711	4.6784346933213e-05
S100A11	0.548833	0.000527789
CD37	0.548852	0.000214152
LOC122432977	0.549028	0.0123682
IFI30	0.54926	0.00109727
SHMT2	0.549279	3.71216950183912e-05
GSTZ1	0.549915	9.73548161894726e-05
NCR3	0.549985	0.0150345
SGF29	0.550193	2.56639057094186e-05
STX5	0.550226	5.27443968396086e-07
CLN3	0.550252	0.000867775
LOC122448045	0.550315	0.0178743
LOC122435810	0.550341	0.0491256
IKBKG	0.550625	5.29571936682001e-05
TLE5	0.550672	7.64377571974259e-05
LGALS1	0.550713	2.22348595427838e-05
SLC38A5	0.55076	0.00227768
SDF4	0.550866	6.986077291424e-06
EMILIN1	0.55096	0.0124721
DUS3L	0.551084	2.66225040135693e-05
RHOC	0.551403	0.00262009
PKMYT1	0.551444	0.00672007
ZNF598	0.551459	0.000305908
LAMTOR1	0.55155	0.000252723
CDK5RAP3	0.551583	7.41887129670318e-07
USF1	0.551594	1.78903407781685e-05
PSKH1	0.551795	6.91617940395761e-05
PPP1R26	0.551953	0.0425955
GPANK1	0.551966	9.87836022689044e-06
LOC122430804	0.552035	0.00657403
APBB3	0.552041	1.69440843218069e-05
GPS1	0.552093	6.33078466429733e-06
SNX19	0.552837	2.77383679159554e-05
HPS4	0.552843	0.000557089
KEAP1	0.552935	1.3765041226775e-06
GBA2	0.55301	0.00046166
MAP3K10	0.55308	0.00316059
VAC14	0.553129	7.0132744273801e-06
TBC1D10A	0.553224	3.27458777362625e-05
LOC122438869	0.553445	5.46634937888504e-05
CUL9	0.553588	0.000488862
LOC122439826	0.553605	5.99587777096546e-05
EPHX3	0.553697	0.00628707
IBA57	0.553825	0.00361066
CCS	0.553838	0.000427606
STARD10	0.553929	0.00606985
MPV17	0.553997	0.00261702
PHYHD1	0.554082	0.00361235
SUGP1	0.554142	3.67077136105731e-08
CCDC97	0.554219	1.35537094099037e-05
EIF3K	0.554243	2.30239676693665e-05
CCDC28B	0.554443	0.00551948
GPC2	0.554508	0.0261239
NOP10	0.554832	0.049143
REPIN1	0.55488	0.00905659
TMEM101	0.555197	0.000315936
FHOD1	0.555223	0.00144431
SUCLG1	0.555351	1.14484974434355e-08
RPL24	0.555466	0.00269752
TDRD10	0.555748	0.0393836
DVL1	0.555881	0.00139983
LOC122440025	0.555964	5.30317941366517e-06
ZNF76	0.55599	1.41902030211722e-05
DXO	0.556025	0.00127984
PCBD1	0.556085	0.00102493
FKBPL	0.556295	0.0189929
SGSM3	0.556735	0.00173355
ATAD3A	0.556766	1.3617653830252e-05
DCTN2	0.556812	2.36070704540784e-09
SPATA2L	0.557547	0.000642684
ZNF513	0.55779	0.000345638
SKIV2L	0.55787	0.000332986
PUF60	0.557947	1.48886513854433e-06
NT5C	0.558218	0.00439095
LOC122447162	0.55828	2.94296544420411e-05
LOC122434355	0.558292	0.0317222
TMEM258	0.55839	0.000114593
PAFAH1B3	0.558408	3.55917956212431e-05
PPP1CA	0.55858	3.25590173814762e-07
RPL27	0.558744	0.00286373
BCL3	0.558841	0.0344048
MYL6	0.558971	3.64620144585818e-05
RDH5	0.559234	0.0159267
KIF22	0.559282	0.000224234
CAPN1	0.560112	0.0104338
FANCE	0.560281	5.52397688088748e-05
APEH	0.560541	3.2379658675931e-06
EXOC7	0.560573	1.30645636379033e-08
MBOAT7	0.560748	0.00129163
UBALD1	0.560886	0.000908683
MRPL9	0.561263	4.65225964701388e-05
ATP6V0D1	0.561289	3.79172836483081e-05
SSH3	0.561439	0.00223275
ST3GAL4	0.56145	1.96743418376395e-05
MAPKAPK3	0.561501	0.000156742
LOC122442464	0.561513	0.0451857
ACCS	0.561714	0.0105285
SAYSD1	0.56179	0.00305369
GBA	0.561854	4.07544924536767e-05
FLT3LG	0.561933	0.00129195
CORO1A	0.562027	0.00012214
GATD3	0.562197	0.000100795
SCAF1	0.562255	1.77259518115256e-05
CD8B	0.562408	0.000455338
ZNF839	0.562536	6.66942914972315e-05
CD7	0.562632	0.00299115
SH2D2A	0.562744	0.00226906
TCF25	0.562935	6.3774181055276e-09
COTL1	0.562974	1.58674250262645e-06
HMCES	0.563373	1.04130205446244e-08
VAMP1	0.563457	0.0120755
TBCB	0.563523	2.10484959690275e-07
POFUT2	0.563635	1.12632724038801e-05
ZNF687	0.563809	0.000330534
LOC122425588	0.564143	2.80813073041771e-07
LOC122446168	0.564276	7.3374917708097e-06
FLOT1	0.564336	2.93015986222451e-05
GNPTG	0.564353	0.00100622
RPL3	0.564427	0.00011509
LOC122440798	0.564541	0.00633663
SUPT4H1	0.564912	1.47506806021489e-05
MORN4	0.565083	0.000643415
ACD	0.565249	0.000381793
NIT1	0.565405	5.87704570349693e-05
ADAM15	0.565409	0.0364194
LLGL2	0.565545	0.00045896
ACTR1B	0.566099	1.829840544267e-05
HDAC5	0.566117	0.00193426
CARMIL2	0.566435	0.000482889
CZIB	0.566509	2.50438515642419e-05
RPL8	0.56684	1.30659820022842e-05
ENO3	0.56686	0.00349494
GNG7	0.566966	0.000502207
MEGF8	0.567097	0.000561437
LOC122453241	0.56716	0.0460365
EEF1G	0.567296	0.000261034
LOC122448243	0.567331	0.00347987
GNA15	0.567451	0.000224174
LOC122435197	0.567473	0.0036302
TKT	0.567483	0.00116538
RAB11FIP4	0.567648	0.000756004
TEN1	0.56765	0.00183954
RAB24	0.567699	0.000313887
NDUFA11	0.567774	0.000173483
LOC122421039	0.567882	0.00223508
ZC3H10	0.568294	5.97774369194259e-06
IDH3G	0.568318	1.4446096175968e-06
HMOX2	0.568337	1.32785994680937e-06
HIC1	0.568378	0.00275411
CDCA3	0.568382	0.00610325
LOC122432749	0.568436	5.50722165740978e-06
NDUFV1	0.568488	5.25771496723585e-06
YIF1A	0.568502	3.18907241492e-07
MRPS15	0.568623	7.29754093738139e-05
POLR1G	0.568671	0.00179686
SEC61G	0.568754	0.00272216
TAPBPL	0.568892	1.06492441234815e-05
CEP295NL	0.569018	0.0249194
CAMKK1	0.56914	0.00188487
MRI1	0.5697	0.000424494
OGFOD3	0.569753	0.00273927
PRKCSH	0.570083	1.00605416586722e-05
LOC122424551	0.570131	8.04316979779509e-05
CSNK1G2	0.570184	9.54867730169274e-06
SZT2	0.570262	0.00359502
C29H11orf24	0.570439	0.033869
DBNDD2	0.570657	0.00187816
ASCC2	0.570894	4.05346893802764e-06
EEF1D	0.571064	1.35688107260531e-11
FCF1	0.571281	0.00395078
TMEM203	0.571312	4.98872010114721e-05
ZNF862	0.571522	7.43164000818393e-06
SURF2	0.571586	3.9967117508223e-05
EXOSC5	0.572101	0.00216412
LOC122433864	0.572257	0.0452006
LOC122440217	0.572278	0.00123919
MYL6B	0.572488	0.0294804
VEGFB	0.57257	0.00214556
LRRC32	0.572607	0.013238
LOC122441435	0.572679	3.2379658675931e-06
KMT5C	0.572904	0.00707944
NR2F6	0.573011	0.000250846
RFC2	0.57312	1.71049765315252e-09
P4HTM	0.573232	0.010037
CARS2	0.573246	0.000335819
NDUFA12	0.573252	0.0011719
ITPA	0.573517	5.24089043983318e-08
SLC15A3	0.573576	0.00241839
DHRS11	0.573788	0.00022842
SCYL1	0.573839	4.00317532231178e-05
LOC122437833	0.573912	0.0330678
MROH1	0.574148	0.0146648
RNF123	0.57432	0.000816122
DNPH1	0.574367	0.0311811
MRPL43	0.574651	0.000119487
ANO9	0.574689	0.00275541
LOC122426746	0.574803	0.00602452
TACC3	0.574909	2.97736250387837e-05
IL27RA	0.575175	0.00122292
MCRS1	0.575304	1.0796205758038e-07
TAF6	0.575401	3.46350128902567e-06
CRYL1	0.575459	0.00395778
LRFN3	0.575679	0.000942932
NUBP1	0.575689	3.07698854117721e-06
KLHL17	0.575693	0.00665196
OSBPL5	0.575865	2.90726205671681e-05
PCYOX1L	0.575921	0.00260613
ZNF74	0.57602	0.000420654
TMED3	0.576174	0.000153217
HMBS	0.576952	7.71416334805789e-06
LOC122426690	0.577179	0.0231102
CUTA	0.577294	2.97617786178197e-05
PLCB3	0.577385	0.00150862
HS1BP3	0.577449	0.00225627
OXLD1	0.577468	0.0476243
LOC122443082	0.577526	0.0256689
SPOUT1	0.577831	0.000281618
APOBR	0.578009	0.000711261
CD79B	0.578032	0.00512519
MPP1	0.578131	0.000156111
TMEM115	0.578658	8.56302078297455e-05
MTG1	0.578889	0.00224661
SEM1	0.578913	0.000533052
ST6GALNAC6	0.578949	0.021391
SLC50A1	0.579058	0.000860915
PCSK7	0.579339	8.30104480832391e-05
ACAD8	0.579469	0.000102367
AMIGO3	0.579487	0.000845064
DEDD2	0.579584	0.0265819
PEMT	0.579734	0.0277178
ADGRL1	0.580001	0.000588103
LOC122444858	0.580108	0.0046121
CCR7	0.580511	0.00103669
NOTCH4	0.580575	0.0136503
CPSF1	0.580614	3.94522780440373e-05
HDGFL2	0.580618	1.06269710822828e-09
ADSS1	0.581004	0.0105908
PYCR3	0.581051	0.000173522
SERINC2	0.581068	0.0241626
ATG16L2	0.581408	0.0110566
RNF5	0.581514	8.074931493346e-07
NUDT8	0.581878	0.045358
LOC122437548	0.582101	0.00964561
DTX1	0.582191	0.0327764
FBF1	0.582464	0.000235765
ZNF500	0.582514	0.000254885
S1PR2	0.582582	0.00896544
ZMYND19	0.582703	0.00012214
SEMA4A	0.582806	0.00587573
LOC122429733	0.582831	6.02429117624313e-05
TIMP1	0.582976	7.46332035306973e-07
GORASP1	0.58309	1.1220334887801e-05
SLC25A39	0.583306	3.72025942400315e-05
BCAT2	0.58333	3.86549943627721e-05
ATP5MJ	0.583364	0.000161568
ACAP1	0.58346	0.000153678
ECSIT	0.583464	0.0151171
ECSCR	0.583515	0.00586332
VRK3	0.583683	2.29155039763359e-07
LOC122438821	0.58387	0.000102402
MRPL2	0.583927	5.4327387378404e-06
PPP1R16A	0.584094	0.00639039
NAGLU	0.584165	0.00172804
TAX1BP3	0.584264	1.24673691632943e-06
FHL3	0.584282	0.00376775
RYR1	0.584311	0.00547337
RNF113A	0.584377	5.25627160387449e-06
KCND1	0.584484	0.00896944
FNDC10	0.584547	0.0294609
KDM8	0.584685	0.000225522
DYNLRB1	0.58476	7.14793934169057e-14
DGKZ	0.584906	0.00114146
TMEM204	0.585104	0.0118012
MSTO1	0.585113	5.66690152530229e-05
HMGCL	0.585145	4.44059081251821e-06
NRM	0.585178	0.000326424
STRN4	0.585481	0.0115562
METTL1	0.585509	0.00108925
FLOT2	0.585606	0.000410729
URM1	0.585734	8.16594494984096e-07
LOC122445473	0.585742	0.0158386
LOC122441459	0.585744	0.00108459
SMIM29	0.585821	0.000416855
DENND1C	0.585917	0.000152155
SCUBE2	0.586055	0.0236264
ZNF593	0.586457	0.00870886
LOC122427322	0.586535	0.0337405
RHBDF2	0.58737	0.00319795
PAGR1	0.587583	9.06258696459951e-07
GSK3A	0.587617	2.84902146038899e-05
SIGMAR1	0.587699	8.59913200082818e-07
KXD1	0.587808	8.19925458521384e-08
DDX49	0.587881	3.81441143025759e-06
LOC122449694	0.587916	2.72406814260954e-07
ATP6V0B	0.58802	7.88062688412261e-05
RELT	0.588055	0.00927535
LOC122444708	0.588144	0.000638374
LOC122440231	0.588222	0.00160131
ST6GALNAC4	0.588229	0.013944
RNASEK	0.588301	1.29594421641068e-06
OST4	0.588303	0.00282852
KCNT1	0.588401	0.0344589
SLAMF7	0.588411	0.000129256
ZBED1	0.588532	3.03236955269093e-05
PRADC1	0.588624	0.00220713
CNDP2	0.588878	5.33573618902642e-05
CCHCR1	0.589009	0.00332265
UBXN11	0.589131	0.00573375
LOC122429902	0.589674	0.000296128
ATP6V0C	0.590259	0.000528431
RNF31	0.590281	9.43026141534364e-06
VARS2	0.59029	1.32703989342838e-05
AP4M1	0.590413	3.98810915575139e-06
COPS6	0.59043	1.57778452243783e-11
SLC35F6	0.59075	0.000477911
LOC122448047	0.590771	0.00101089
LYPLA2	0.591181	0.000238672
HSPBP1	0.59119	0.000178364
CDIPT	0.591222	7.91892960773159e-06
TMEM11	0.591307	4.03278796059568e-05
LYRM4	0.591365	0.00148489
RTN2	0.591651	0.0275074
SLX9	0.591919	3.93946753909287e-05
PRPF31	0.592062	6.99118376381206e-07
LIMK2	0.592137	0.000953385
CCDC22	0.592185	0.000460628
IQGAP3	0.592512	0.0124197
MSRB2	0.592591	7.43507350443066e-05
RPL9	0.592636	0.000696763
NFILZ	0.59276	0.0186025
TSPOAP1	0.593159	0.0011559
SLC37A4	0.593221	0.000624842
IRF3	0.593314	8.70321597176714e-07
ASF1B	0.593413	2.52015300078105e-05
TMEM143	0.593609	7.41154384139596e-05
NABP2	0.593751	9.09538926750572e-08
CD300LF	0.5938	0.0130159
LOC122442286	0.593832	0.00295784
NLE1	0.59384	3.96709193918228e-06
DAGLB	0.593859	0.0137434
C6H15orf62	0.593874	1.32703989342838e-05
SH3GLB2	0.593933	9.66728799359026e-05
STAR	0.594001	0.0135397
MTMR14	0.594063	6.68171222585773e-07
COASY	0.594231	2.62273396083936e-06
GHDC	0.594441	0.000515335
LOC122437835	0.594687	0.0482187
AGPAT4	0.595089	0.000253456
LPCAT3	0.595159	8.3562543879736e-05
CD2	0.595207	0.00244126
PSMD4	0.595334	3.33926779948118e-12
BORCS6	0.595485	7.5736145278352e-06
ABCB9	0.595579	0.004218
ZFYVE19	0.595763	0.00396263
DEF6	0.595775	1.40627785614679e-07
CENPM	0.595807	1.43336455536689e-06
CTRL	0.595829	0.00418258
APOBEC3A	0.596022	0.000395465
LOC122420357	0.596106	8.85142712370634e-08
RPL21	0.596209	1.96708163725107e-05
PIH1D1	0.596278	0.00614454
UNC93B1	0.596435	0.00192469
MBLAC1	0.596622	0.00660053
YPEL3	0.596778	0.00289186
KCNK12	0.596842	0.0195532
VWA3B	0.596987	0.0258962
KRT24	0.597219	0.047833
CHMP2A	0.597465	1.96097363475137e-08
ZNF771	0.597536	0.00274193
HSF1	0.597734	2.49642366568846e-05
ATP6V1F	0.59793	5.35648463574005e-08
NCF4	0.598368	0.000880602
RRAS	0.598615	0.000614556
ATP5MF	0.598794	6.51715824554926e-05
PCED1A	0.599057	0.0019341
ILVBL	0.599138	0.00425535
C28H6orf47	0.599251	2.48525717512608e-06
TMC6	0.599503	0.000696763
C1H12orf43	0.59952	4.22110009295262e-06
NAA60	0.599543	3.2007862196034e-05
ABHD14A	0.59966	0.00231619
CD2BP2	0.599845	1.54971883902287e-07
PRRT2	0.600189	0.000152677
MRPS26	0.600228	7.44484609790257e-06
LEMD2	0.600284	4.74216801319335e-05
TPRG1L	0.60035	5.8732738010594e-06
SMPD1	0.600382	3.34577693580705e-05
LOC122447932	0.600564	0.0383119
DTNBP1	0.601173	4.60286397488864e-06
PFDN6	0.601225	1.34585245914225e-06
NMRAL1	0.601245	0.000988966
PLCD1	0.601435	0.0110725
LOC122455063	0.601472	0.0159867
TUT1	0.601564	4.23025303437019e-05
INTS1	0.601677	5.75029784397424e-05
RAB40C	0.601759	5.68361517603679e-05
TRADD	0.601773	9.16719492310384e-05
FADD	0.601985	3.74857891750891e-05
NAALADL1	0.601987	3.5889579329972e-05
L3MBTL2	0.602473	9.0614766275216e-05
WASHC1	0.602484	1.10527174239891e-08
MMAB	0.602994	5.85424880388242e-05
GPAA1	0.603267	0.00184431
ROM1	0.603371	5.04966763373088e-05
TIMM17A	0.603457	4.28065085988824e-06
HIGD2A	0.603504	4.34185819383542e-05
GIPC1	0.603561	0.000836115
HRAS	0.603585	0.000122799
CSTB	0.603726	1.70843062679283e-05
DTX2	0.603856	0.000117575
BAIAP3	0.603878	0.00311187
SPATA32	0.604207	6.08834966336255e-06
LOC122429106	0.604292	5.07606646772634e-06
BRI3	0.604357	0.000194298
CHI3L1	0.604531	0.0271989
ADI1	0.60486	0.0017132
LRP1	0.605019	0.0181117
NUPR1	0.605027	0.0204873
[truncated: 1,579 more rows]
