# Supplementary material for: Peripheral transcriptional responses to experimental SARS-CoV-2 inoculation in North American Elk cows and calves
Source: Research Square preprint supplement (doi:10.21203/rs.3.rs-6505643/v1), 2025-05-15
Supplement: Supplementary file 3 [file 33ccd7a25bdf9b3765da38a7.xlsx]

## Sheet: Suppl_table8_MF,BP, KEGG_UpDEG_
Category	Term	Count	%	PValue	Genes	List Total	Pop Hits	Pop Total	Fold Enrichment	Bonferroni	Benjamini	FDR
GOTERM_BP_DIRECT	GO:0051607~defense response to virus	22	1.57933	4.00412e-16	RSAD2, MX2, LOC122431078, LOC122431079, MX1, IFIT5, LOC122449458, LOC122430804, IFIT3, LOC122446174, IFIT2, BST2, ISG20, LOC122431080, LOC122422848, STING1, LOC122431250, LOC122422854, LOC122422844, LOC122422833, APOBEC3A, APOBEC3B	999	38	15999	9.27185	4.57412e-13	4.12024e-13	4.09221e-13
KEGG_PATHWAY	ccad05164:Influenza A	40	2.8715	6.29967e-11	LOC122446062, NXT1, LOC122452766, LOC122429106, ADAR, ICAM1, IFIH1, CASP1, AKT1, TRIM25, LOC122429902, BAK1, IKBKG, LOC122422854, BID, LOC122422833, MAPK3, LOC122433435, RSAD2, STAT1, IFNGR2, MX2, STAT2, MX1, EIF2AK2, PML, TNFRSF1A, NFKBIA, LOC122422848, CXCL10, LOC122440231, IRF3, IRF7, BAX, LOC122440910, LOC122422844, MYD88, IRF9, NFKBIB, SLC25A6	665	192	10427	3.2666	2.07889e-08	2.08519e-08	1.66941e-08
KEGG_PATHWAY	ccad05020:Prion disease	56	4.0201	1.32994e-10	NDUFA13, NCF1, LOC122451456, NDUFA12, NCF4, TUBB6, CREB3L3, CREB3L4, RAC2, RAC1, SDHC, SDHB, LOC122441380, PSMA5, NDUFS8, NDUFS7, DDIT3, CSNK2B, NDUFS3, LOC122421476, LOC122455265, LOC122421478, ATF4, SLC25A6, C1QB, C1QA, NDUFB9, NDUFB7, LOC122451077, NDUFB10, NDUFB11, ATP5MC2, NDUFB1, LOC122420491, ATP5MC1, LOC122424937, PSMB7, PSMB4, PSMB5, PSMB2, PSMB3, LOC122420817, LOC122422557, MAPK3, NDUFA…	665	343	10427	2.55995	4.38881e-08	2.20106e-08	1.76217e-08
KEGG_PATHWAY	ccad05208:Chemical carcinogenesis - reactive oxygen species	49	3.51759	1.12962e-09	LOC122446062, NDUFA13, NCF1, LOC122451456, NDUFA12, ARAF, AKT1, IKBKG, RAC1, HRAS, AKR1A1, SDHC, SDHB, LOC122441380, NDUFS8, NDUFS7, NDUFS3, LOC122421476, LOC122429517, LOC122455265, LOC122421478, PRKD1, SLC25A6, NDUFB9, NDUFB7, LOC122451077, NDUFB10, NDUFB11, MGST3, ATP5MC2, NDUFB1, LOC122446364, LOC122420491, ATP5MC1, LOC122424937, HMOX1, LOC122420817, LOC122422557, MAPK3, NDUFA8, ATP5PD, LOC12…	665	294	10427	2.61328	3.72774e-07	1.24635e-07	9.97831e-08
KEGG_PATHWAY	ccad05012:Parkinson disease	54	3.87653	2.18668e-09	NDUFA13, LOC122451456, NDUFA12, UBE2L6, UBE2L3, TXN2, TUBB6, SLC39A1, SDHC, SLC39A13, SDHB, LOC122441380, PSMA5, NDUFS8, ADORA2A, NDUFS7, DDIT3, NDUFS3, LOC122421476, LOC122455265, LOC122421478, UBA52, ATF4, SLC25A6, NDUFB9, NDUFB7, LOC122451077, NDUFB10, UBA7, NDUFB11, ATP5MC2, NDUFB1, LOC122420491, GNAI2, ATP5MC1, LOC122424937, PSMB7, PSMB4, PSMB5, PSMB2, UBB, PSMB3, DRD1, LOC122422557, NDUFA8,…	665	349	10427	2.42609	7.21604e-07	1.80948e-07	1.44867e-07
GOTERM_BP_DIRECT	GO:0045071~negative regulation of viral genome replication	10	0.717875	2.56122e-09	ISG20, LOC122431080, LOC122422848, LOC122431078, LOC122431079, LOC122430804, LOC122431250, LOC122422854, LOC122422844, LOC122422833	999	12	15999	13.3458	2.63805e-06	1.31775e-06	1.30878e-06
KEGG_PATHWAY	ccad04623:Cytosolic DNA-sensing pathway	22	1.57933	1.59673e-08	LOC122431238, GSDMD, ZBP1, LOC122447382, RIPK3, LOC122433435, LOC122452766, TREX1, CGAS, ADAR, MEFV, NFKBIA, CXCL10, STING1, IRF3, CASP1, IRF7, POLR2F, DNASE2, IKBKG, POLR2L, NFKBIB	665	80	10427	4.31192	5.26919e-06	1.05703e-06	8.46266e-07
KEGG_PATHWAY	ccad04932:Non-alcoholic fatty liver disease	37	2.65614	3.10179e-08	NDUFB9, NDUFA13, LOC122451077, NDUFB7, LOC122451456, NDUFB10, NDUFB11, NDUFA12, PRKAG1, NDUFB1, LOC122420491, LOC122424937, AKT1, RAC1, LOC122422557, BID, NDUFA8, XBP1, TGFB1, LOC122431334, NDUFA3, NR1H3, SDHC, SDHB, LOC122441380, TNFRSF1A, LOC122420886, NDUFS8, NDUFS7, DDIT3, NDUFS3, BAX, LOC122421476, LOC122455265, LOC122421478, MAP3K11, ATF4	665	208	10427	2.78918	1.02358e-05	1.34143e-06	1.07395e-06
KEGG_PATHWAY	ccad05010:Alzheimer disease	63	4.52261	3.20776e-08	LOC122446062, NDUFA13, CSF1, LOC122451456, NDUFA12, ARAF, TUBB6, AKT1, IKBKG, HRAS, SLC39A1, PSENEN, SDHC, SLC39A13, WIPI2, SDHB, LOC122441380, TNFRSF1A, PSMA5, NDUFS8, NDUFS7, DDIT3, CSNK2B, NDUFS3, LOC122421476, LOC122455265, LOC122421478, GAPDH, ATF4, SLC25A6, NDUFB9, NDUFB7, LOC122451077, NDUFB10, NDUFB11, ATP5MC2, NDUFB1, LOC122420491, ATP5MC1, APH1A, LOC122424937, PSMB7, PSMB4, PSMB5, PSMB2…	665	473	10427	2.08842	1.05856e-05	1.34143e-06	1.07395e-06
KEGG_PATHWAY	ccad05169:Epstein-Barr virus infection	39	2.79971	3.24212e-08	LOC122429686, LOC122429603, LOC122452766, LOC122429106, RELB, ICAM1, IRAK1, AKT1, LOC122429902, BAK1, IKBKG, RAC1, LOC122422854, BID, LOC122422833, LYN, GADD45B, STAT1, STAT2, TAP2, EIF2AK2, TAP1, ISG15, LOC122429593, GADD45G, NFKB2, NFKBIA, LOC122422848, CXCL10, IRF3, PSMC4, IRF7, BAX, VIM, NFKBIE, LOC122422844, MYD88, IRF9, NFKBIB	665	227	10427	2.69387	1.06989e-05	1.34143e-06	1.07395e-06
KEGG_PATHWAY	ccad05016:Huntington disease	54	3.87653	4.31924e-08	NDUFA13, LOC122451456, NDUFA12, CLTB, TUBB6, CREB3L3, CREB3L4, AP2M1, GPX1, SDHC, WIPI2, SDHB, LOC122441380, PSMA5, NDUFS8, NDUFS7, NDUFS3, LOC122421476, LOC122455265, LOC122421478, SLC25A6, NDUFB9, NDUFB7, LOC122451077, NDUFB10, NDUFB11, DCTN3, ATP5MC2, NDUFB1, LOC122420491, ATP5MC1, LOC122424937, PSMB7, PSMB4, PSMB5, PSMB2, PSMB3, ATG101, POLR2F, POLR2G, POLR2I, LOC122422557, POLR2J, POLR2L, ND…	665	380	10427	2.22817	1.42534e-05	1.58852e-06	1.27178e-06
KEGG_PATHWAY	ccad05160:Hepatitis C	34	2.44078	6.35328e-08	SCARB1, LOC122446062, LOC122452766, CD81, ARAF, AKT1, BAK1, IKBKG, LOC122422854, BID, HRAS, LOC122422833, MAPK3, RSAD2, STAT1, BAD, MX2, STAT2, MX1, EIF2AK2, NR1H3, LOC122446174, TNFRSF1A, NFKBIA, LOC122422848, CXCL10, LOC122440231, CLDN4, IRF3, IRF7, BAX, LOC122440910, LOC122422844, IRF9	665	186	10427	2.86618	2.09656e-05	2.10294e-06	1.68362e-06
KEGG_PATHWAY	ccad05022:Pathways of neurodegeneration - multiple diseases	70	5.02513	1.03515e-07	LOC122446062, NDUFA13, CSF1, LOC122451456, NDUFA12, ARAF, UBE2L6, UBE2L3, TUBB6, MAP1LC3A, RAC1, HRAS, RAB8A, GPX1, SDHC, WIPI2, SDHB, TOMM40L, LOC122441380, TNFRSF1A, PSMA5, NDUFS8, NDUFS7, DDIT3, CSNK2B, NDUFS3, LOC122421476, LOC122455265, LOC122421478, UBA52, OPTN, ATF4, SLC25A6, NDUFB9, NDUFB7, LOC122451077, NDUFB10, UBA7, NDUFB11, DCTN3, ATP5MC2, NDUFB1, LOC122420491, ATP5MC1, LOC122424937, …	665	567	10427	1.93577	3.41593e-05	3.11485e-06	2.49376e-06
KEGG_PATHWAY	ccad04621:NOD-like receptor signaling pathway	34	2.44078	2.02527e-07	RNF31, NOD1, LOC122449950, MEFV, LOC122436717, TXN2, PSTPIP1, MAP1LC3A, CASP1, LOC122420817, IKBKG, LOC122422854, LOC122422833, GPSM3, MAPK3, LOC122431238, GSDMD, RIPK3, LOC122433435, STAT1, STAT2, CARD9, CARD6, NFKBIA, LOC122422848, IRF3, STING1, IRF7, RBCK1, PKN1, LOC122422844, MYD88, IRF9, NFKBIB	665	195	10427	2.7339	6.68316e-05	5.58637e-06	4.47247e-06
KEGG_PATHWAY	ccad04662:B cell receptor signaling pathway	21	1.50754	3.07526e-07	LYN, LOC122446062, LOC122421171, LOC122421185, CD81, LOC122431079, LOC122430804, LILRA5, CD79B, NFKBIA, LOC122440231, RAC2, AKT1, LOC122440910, IKBKG, RAC1, NFKBIE, FCGR2B, HRAS, MAPK3, NFKBIB	665	86	10427	3.82876	0.000101478	7.83007e-06	6.26879e-06
GOTERM_BP_DIRECT	GO:0060337~type I interferon-mediated signaling pathway	7	0.502513	3.85004e-07	LOC122431080, STAT1, LOC122431078, STAT2, LOC122431079, LOC122430804, LOC122431250	999	7	15999	16.015	0.000396476	0.000132057	0.000131158
KEGG_PATHWAY	ccad00190:Oxidative phosphorylation	35	2.51256	4.92854e-07	NDUFB9, NDUFA13, LOC122451077, NDUFB7, LOC122451456, NDUFB10, NDUFB11, NDUFA12, ATP5MC2, NDUFB1, TCIRG1, LOC122420491, ATP5MC1, LOC122424937, LOC122422557, ATP6V1F, NDUFA8, ATP6V0B, ATP5PD, ATP6V0E1, LOC122431334, NDUFA3, SDHC, ATP5F1D, SDHB, LOC122441380, LOC122420886, NDUFS8, NDUFS7, NDUFS3, LOC122421476, LOC122455265, LOC122421478, ATP6V0D1, ATP6V0C	665	212	10427	2.58863	0.000162629	1.16525e-05	9.32902e-06
KEGG_PATHWAY	ccad05132:Salmonella infection	43	3.08686	8.61361e-07	LOC122446062, RAB5C, ARPC1B, ARPC1A, DCTN3, NOD1, LOC122449950, SNX33, TXN2, CYTH2, TUBB6, CYTH4, RRAS, IRAK1, CASP1, RPS3, AKT1, BAK1, IKBKG, RAC1, HRAS, MAPK3, GSDMD, RIPK3, DYNLT1, LOC122433435, LOC122426664, RHOG, ARPC4, DYNLL1, TNFRSF1A, NFKBIA, LOC122440231, PLEKHM1, BAX, LOC122434981, PLEKHM2, LOC122440910, PKN1, DYNLRB1, GAPDH, MYL9, MYD88	665	298	10427	2.26251	0.000284209	1.90074e-05	1.52174e-05
KEGG_PATHWAY	ccad05162:Measles	29	2.08184	9.66296e-07	LOC122452766, ADAR, IFIH1, IRAK1, RACK1, AKT1, BAK1, IKBKG, LOC122422854, BID, LOC122422833, STAT1, BAD, MX2, STAT2, HSPA6, MX1, EIF2AK2, NFKBIA, LOC122422848, IRF3, CSNK2B, IRF7, BAX, FCGR2B, LOC122422844, MYD88, IRF9, NFKBIB	665	161	10427	2.82429	0.000318827	1.99902e-05	1.60043e-05
KEGG_PATHWAY	ccad05415:Diabetic cardiomyopathy	40	2.8715	1.0428e-06	NDUFB9, NDUFA13, LOC122451077, NDUFB7, LOC122451456, NCF1, NDUFB10, NDUFB11, NDUFA12, NCF4, ATP5MC2, NDUFB1, LOC122420491, ATP5MC1, LOC122424937, RAC2, AKT1, LOC122420817, RAC1, LOC122422557, NDUFA8, G6PD, ATP5PD, TGFB1, LOC122431334, NDUFA3, SDHC, ATP5F1D, SDHB, LOC122441380, PPP1CA, LOC122420886, NDUFS8, NDUFS7, NDUFS3, LOC122421476, LOC122455265, LOC122421478, GAPDH, SLC25A6	665	269	10427	2.33155	0.000344064	2.03039e-05	1.62553e-05
KEGG_PATHWAY	ccad05014:Amyotrophic lateral sclerosis	57	4.09189	1.87437e-06	NDUFA13, NXT1, LOC122451456, NDUFA12, TUBB6, MAP1LC3A, CASP1, RAC1, RAB8A, GPX1, SDHC, WIPI2, SDHB, TOMM40L, LOC122441380, TNFRSF1A, PSMA5, NDUFS8, NDUFS7, DDIT3, NDUFS3, LOC122421476, LOC122455265, LOC122421478, OPTN, ATF4, NDUFB9, NDUFB7, LOC122451077, NDUFB10, NDUFB11, DCTN3, ATP5MC2, NDUFB1, LOC122420491, ATP5MC1, LOC122424937, PSMB7, PSMB4, PSMB5, PSMB2, PSMB3, ATG101, BID, LOC122422557, NDU…	665	461	10427	1.9387	0.000618353	3.44677e-05	2.7595e-05
KEGG_PATHWAY	ccad05170:Human immunodeficiency virus 1 infection	36	2.58435	2.95918e-06	LOC122446062, LOC122429686, LOC122429603, CGAS, GNAI2, IRAK1, CFL1, RAC2, PTK2B, AKT1, AP1S1, ELOB, BAK1, IKBKG, RAC1, LOC122426558, BID, HRAS, AP1M2, MAPK3, BAD, TAP2, TAP1, LOC122429593, TNFRSF1A, BST2, NFKBIA, LOC122440231, IRF3, STING1, GNB2, BAX, LOC122440910, APOBEC3A, MYD88, APOBEC3B	665	239	10427	2.3618	0.000976053	5.1552e-05	4.12727e-05
KEGG_PATHWAY	ccad05171:Coronavirus disease - COVID-19	65	4.66619	8.5016e-06	RPLP1, CGAS, ADAR, IFIH1, LOC122420998, RPS15, RPS14, RPL18A, RPL36AL, RPL36, CASP1, RPLP2, IKBKG, LOC122422854, RPS13, RPS12, LOC122429552, VWF, RPL21, LOC122451787, LOC122430223, TNFRSF1A, LOC122422848, LOC122428908, IRF3, LOC122434981, RPL29, RPL28, LOC122422844, UBA52, LOC122423218, IRF9, LOC122439670, C1QB, C1QA, RPL10, C1S, C1R, LOC122452766, C2, LOC122450939, IRAK1, RPS3, RPL14, RPL18, LOC…	665	579	10427	1.76024	0.00280161	0.000138022	0.000110501
KEGG_PATHWAY	ccad05133:Pertussis	18	1.29218	8.7567e-06	C1QB, C1QA, LOC122433435, C1S, C1R, NOD1, C2, GNAI2, IRAK1, IRF3, IRF1, CFL1, CASP1, SERPING1, LOC122426558, MYD88, MAPK3, C1QC	665	80	10427	3.52793	0.00288555	0.000138022	0.000110501
GOTERM_CC_DIRECT	GO:0005762~mitochondrial large ribosomal subunit	12	0.86145	1.31033e-05	MRPL52, MRPL40, MRPL38, MRPL16, MRPL28, MRPL36, MRPL58, MRPL12, MRPL46, MRPL54, MRPL43, MRPL55	987	37	15361	5.04756	0.00439308	0.00440272	0.00436341
KEGG_PATHWAY	ccad04380:Osteoclast differentiation	24	1.7229	1.62865e-05	LOC122421171, SPI1, TGFB1, LOC122421185, NCF1, CSF1, STAT1, LOC122430223, IFNGR2, STAT2, NCF4, RELB, TNFRSF1A, LILRA5, NFKB2, NFKBIA, AKT1, FOSB, LOC122420817, IKBKG, RAC1, FCGR2B, IRF9, MAPK3	665	137	10427	2.74681	0.00536018	0.000245038	0.000196179
KEGG_PATHWAY	ccad04714:Thermogenesis	40	2.8715	3.46472e-05	NDUFB9, NDUFA13, LOC122451077, NDUFB7, LOC122451456, NDUFB10, NDUFB11, NDUFA12, ADCY4, PRKAG1, ATP5MC2, NDUFB1, LOC122420491, ATP5MC1, LIPE, LOC122424937, SLC25A29, LOC122441435, CREB3L3, CREB3L4, LOC122422557, HRAS, NDUFA8, ATP5PD, LOC122431334, NDUFA3, SIRT6, SDHC, ATP5F1D, SDHB, LOC122441380, LOC122420886, NDUFS8, NDUFS7, ADRB3, NDUFS3, LOC122421476, LOC122455265, LOC122421478, PNPLA2	665	311	10427	2.01668	0.0113686	0.000498618	0.000399195
KEGG_PATHWAY	ccad04145:Phagosome	27	1.93826	4.73968e-05	SCARB1, LOC122429686, RAB5C, NCF1, LOC122429603, C1R, LOC122429106, NCF4, TCIRG1, CORO1A, TUBB6, LAMP1, LOC122429902, LOC122420817, RAC1, ATP6V1F, ATP6V0B, ATP6V0E1, LOC122430223, LOC122426664, TAP2, TAP1, LOC122429593, MARCO, FCGR2B, ATP6V0D1, ATP6V0C	665	176	10427	2.40541	0.0155196	0.00065368	0.000523339
GOTERM_CC_DIRECT	GO:0005839~proteasome core complex	9	0.646088	5.76533e-05	PSMA5, PSMB7, PSMB4, PSMB5, PSMB2, PSMB3, PSMB8, PSMB10, PSMB9	987	23	15361	6.09	0.0191856	0.00968575	0.00959927
GOTERM_BP_DIRECT	GO:0035455~response to interferon-alpha	5	0.358938	7.15358e-05	LOC122431080, LOC122431078, LOC122431079, LOC122430804, LOC122431250	999	5	15999	16.015	0.0710352	0.0122684	0.0121849
GOTERM_BP_DIRECT	GO:0046597~negative regulation of viral entry into host cell	5	0.358938	7.15358e-05	LOC122431080, LOC122431078, LOC122431079, LOC122430804, LOC122431250	999	5	15999	16.015	0.0710352	0.0122684	0.0121849
GOTERM_BP_DIRECT	GO:0035456~response to interferon-beta	5	0.358938	7.15358e-05	LOC122431080, LOC122431078, LOC122431079, LOC122430804, LOC122431250	999	5	15999	16.015	0.0710352	0.0122684	0.0121849
KEGG_PATHWAY	ccad05152:Tuberculosis	29	2.08184	8.54801e-05	RAB5C, LOC122429106, LSP1, TCIRG1, CORO1A, LAMP1, IRAK1, AKT1, LOC122429902, BID, MAPK3, CD74, ATP6V0B, TGFB1, FCER1G, STAT1, SPHK2, BAD, LOC122430223, IFNGR2, SPHK1, CARD9, RFXANK, TNFRSF1A, BAX, FCGR2B, ATP6V0D1, ATP6V0C, MYD88	665	203	10427	2.23996	0.0278155	0.00113176	0.000906089
KEGG_PATHWAY	ccad04217:Necroptosis	28	2.01005	8.92225e-05	RNF31, LOC122423300, LOC122429181, LOC122442443, SMPD1, LOC122438238, CHMP1A, CASP1, BID, LOC122438195, ZBP1, RIPK3, LOC122433435, STAT1, IFNGR2, STAT2, LOC122426323, EIF2AK2, TNFRSF1A, CHMP2A, LOC122427539, BAX, CHMP4B, CHMP4A, RBCK1, IRF9, FTL, SLC25A6	665	193	10427	2.27478	0.0290155	0.00113587	0.000909383
GOTERM_BP_DIRECT	GO:0051603~proteolysis involved in protein catabolic process	9	0.646088	9.27762e-05	PSMB7, PSMB4, PSMB5, PSMB3, CTSZ, CTSH, PSMB8, PSMB10, PSMB9	999	25	15999	5.76541	0.0911397	0.0136381	0.0135453
GOTERM_CC_DIRECT	GO:0005737~cytoplasm	188	13.4961	9.42695e-05	SCARB1, GHDC, CRTC2, NCF1, AVIL, LOC122432410, RNF19B, MPV17L2, ACTG2, TUBB6, LOC122438238, CFL1, CAPN5, ARHGDIB, DHX58, CCRL2, HOMER3, FBXO6, LOC122427509, LOC122438195, TMSB10, CMTR1, SH3GL1, SH3GLB2, ARRDC1, DAPK2, MAGI2, TALDO1, VASH1, VRK3, JMJD8, MOB3A, ALDH3A1, MOB3C, DOK2, DOK3, BIN3, MAPKAPK3, DDIT3, LOC122442751, CSNK2B, PSME1, CMPK2, S100A5, PSME2, S100A4, LAP3, SULT6B1, IDO2, UBA52, M…	987	2260	15361	1.29465	0.0311796	0.0105582	0.0104639
KEGG_PATHWAY	ccad05167:Kaposi sarcoma-associated herpesvirus infection	30	2.15363	0.000145345	LOC122446062, LOC122429686, LOC122429603, ICAM1, MAP1LC3A, UBB, AKT1, BAK1, IKBKG, RAC1, BID, HRAS, MAPK3, LYN, LOC122429598, STAT1, STAT2, EIF2AK2, LOC122429593, TNFRSF1A, NFKBIA, HCK, LOC122440231, IRF3, GNB2, IRF7, BAX, LOC122440910, UBA52, IRF9	665	220	10427	2.13814	0.046835	0.00178182	0.00142653
KEGG_PATHWAY	ccad03050:Proteasome	13	0.933238	0.000167892	PSMB10, PSMB8, PSMB9, PSMA5, PSMB7, PSMB4, PSMB5, PSMB2, PSMC4, PSMB3, PSME1, PSME2, LOC122450370	665	56	10427	3.63993	0.0539018	0.00198472	0.00158898
GOTERM_BP_DIRECT	GO:0002376~immune system process	6	0.430725	0.000180928	IRF3, IRF1, IRF7, LOC122448005, IRF5, IRF9	999	10	15999	9.60901	0.170035	0.0232718	0.0231135
KEGG_PATHWAY	ccad04144:Endocytosis	34	2.44078	0.000209642	LOC122429686, RAB5C, LOC122429603, ARPC1B, ARPC1A, CLTB, CYTH2, CYTH4, CHMP1A, PSD3, MVB12A, WASHC1, HRAS, AP2M1, RAB8A, SH3GL1, SH3GLB2, LOC122432541, HSPA6, ARPC4, ARAP1, VPS37B, SNF8, LOC122429593, PML, EPN1, EHD1, EHD3, EHD4, CHMP2A, CHMP4B, CHMP4A, LOC122426789, VPS25	665	269	10427	1.98182	0.0668499	0.00239281	0.0019157
KEGG_PATHWAY	ccad05235:PD-L1 expression and PD-1 checkpoint pathway in cancer	17	1.22039	0.00026334	LOC122446062, BATF2, CD274, STAT1, IFNGR2, BATF, NFKBIA, LOC122440231, CSNK2B, AKT1, LOC122440910, IKBKG, NFKBIE, HRAS, MYD88, MAPK3, NFKBIB	665	94	10427	2.83569	0.0832439	0.00278082	0.00222634
KEGG_PATHWAY	ccad05211:Renal cell carcinoma	15	1.07681	0.000270776	LOC122446062, ARNT2, TGFB1, EGLN2, BAD, TFE3, PRCC, ARAF, LOC122440231, AKT1, LOC122440910, ELOB, RAC1, HRAS, MAPK3	665	76	10427	3.09468	0.0854913	0.00278082	0.00222634
KEGG_PATHWAY	ccad04370:VEGF signaling pathway	13	0.933238	0.000282372	LOC122446062, SPHK2, BAD, SPHK1, HSPB1, LOC122440231, MAPKAPK3, RAC2, AKT1, LOC122440910, RAC1, HRAS, MAPK3	665	59	10427	3.45485	0.088985	0.00278082	0.00222634
KEGG_PATHWAY	ccad04666:Fc gamma R-mediated phagocytosis	18	1.29218	0.00028247	LYN, MARCKSL1, NCF1, SPHK2, LOC122430223, SPHK1, ARPC1B, ARPC1A, ARPC4, LOC122431989, HCK, CFL1, RAC2, AKT1, RAC1, LOC122426558, FCGR2B, MAPK3	665	104	10427	2.71379	0.0890144	0.00278082	0.00222634
KEGG_PATHWAY	ccad01100:Metabolic pathways	147	10.5528	0.000285644	NDUFA13, LOC122451456, NDUFA12, LOC122432410, PLOD1, COMT, ENO3, CNDP2, MLYCD, ACAA1, ARSA, ACOT8, G6PD, ATP6V0E1, SDS, ALG3, TALDO1, SDHC, SDHB, ASRGL1, LOC122441380, DPM2, ALDH3A1, DPM3, ETHE1, CMPK2, LOC122421476, LOC122429517, LOC122455265, LAP3, LOC122421478, IDO2, ATP6V0D1, IDO1, ISYNA1, NDUFB10, NDUFB11, LOC122454546, MGST3, LOC122426554, ATP5MC2, PLD4, GMPR, LOC122446364, LOC122436913, AK…	665	1764	10427	1.30664	0.0899683	0.00278082	0.00222634
KEGG_PATHWAY	ccad05213:Endometrial cancer	13	0.933238	0.000390896	LOC122446062, GADD45B, BAD, ARAF, ILK, GADD45G, LOC122440231, BAX, AKT1, LOC122440910, BAK1, HRAS, MAPK3	665	61	10427	3.34158	0.121044	0.00362117	0.00289913
GOTERM_BP_DIRECT	GO:0045087~innate immune response	17	1.22039	0.000393959	LYN, FCER1G, LOC122433435, LY86, PTK6, RELB, NFKB2, BST2, FGR, IFIH1, HCK, ADAM15, STING1, DHX58, SHFL, MYD88, TRIM56	999	99	15999	2.75005	0.333595	0.0450426	0.0447362
GOTERM_MF_DIRECT	GO:0003725~double-stranded RNA binding	9	0.646088	0.000398063	IFIH1, LOC122422848, LOC122452766, DHX58, EIF2AK2, ADAR, LOC122422854, LOC122422844, LOC122422833	963	32	16442	4.80199	0.207147	0.232071	0.232071
KEGG_PATHWAY	ccad04625:C-type lectin receptor signaling pathway	18	1.29218	0.000399154	FCER1G, LOC122433435, STAT1, STAT2, CARD9, LSP1, RELB, NFKB2, NFKBIA, RRAS, IRF1, BCL3, CASP1, AKT1, IKBKG, HRAS, IRF9, MAPK3	665	107	10427	2.63771	0.123437	0.00362117	0.00289913
KEGG_PATHWAY	ccad05166:Human T-cell leukemia virus 1 infection	32	2.2972	0.000404784	LOC122446062, LOC122429686, CRTC2, ANAPC15, SPI1, LOC122429603, LOC122429106, ADCY4, RELB, ANAPC11, ICAM1, CREB3L3, CREB3L4, TSPO, AKT1, LOC122429902, IKBKG, HRAS, MAPK3, IL15RA, TGFB1, LOC122429593, NFKB2, TNFRSF1A, NFKBIA, KAT2A, LOC122440231, BAX, LOC122440910, LTBR, ATF4, SLC25A6	665	256	10427	1.95996	0.125065	0.00362117	0.00289913
KEGG_PATHWAY	ccad04148:Efferocytosis	24	1.7229	0.000516131	C1QB, LOC122446062, C1QA, DUSP2, ARG2, RAB5C, TGFB1, SLC66A1, MEGF11, SPHK2, SPHK1, LOC122432410, NR1H3, TIMD4, XKR8, LOC122440231, LOC122420886, P2RY6, LOC122436432, CASP1, LOC122440910, RAC1, MAPK3, C1QC	665	171	10427	2.20066	0.156645	0.00442495	0.00354263
KEGG_PATHWAY	ccad05135:Yersinia infection	22	1.57933	0.000521369	LOC122446062, LOC122433435, LOC122430223, ARPC1B, ARPC1A, RHOG, ARPC4, MEFV, NFKBIA, LOC122440231, IRAK1, IRF3, RAC2, CASP1, PTK2B, AKT1, LOC122440910, IKBKG, PKN1, RAC1, MYD88, MAPK3	665	150	10427	2.29969	0.158102	0.00442495	0.00354263
KEGG_PATHWAY	ccad04142:Lysosome	21	1.50754	0.000649387	ARSA, ATP6V0B, CTSZ, HEXA, CLTB, LAPTM5, ABCB9, TCIRG1, CLN3, LAMP1, HYAL1, SMPD1, LOC122444708, CTSH, AP1S1, DNASE2, ARSG, CD68, ATP6V0D1, ATP6V0C, AP1M2	665	142	10427	2.31883	0.192948	0.00537368	0.00430219
KEGG_PATHWAY	ccad05220:Chronic myeloid leukemia	15	1.07681	0.000689643	LOC122446062, TGFB1, GADD45B, BAD, ARAF, GADD45G, NFKBIA, LOC122440231, BAX, AKT1, LOC122440910, IKBKG, BAK1, HRAS, MAPK3	665	83	10427	2.83368	0.203606	0.00556761	0.00445745
GOTERM_CC_DIRECT	GO:0005739~mitochondrion	55	3.94831	0.000714076	MTCH1, MTCH2, ECI1, LOC122432410, ARAF, LOC122454846, TXN2, LOC122419678, HK3, TMEM223, ABHD11, FDXR, PMPCA, SLC25A45, ARG2, GPX1, RSAD2, MRPS24, MRPS25, CMC2, CMC1, TNFRSF1A, SDHAF2, TST, LOC122438821, CARD19, PTRH2, FDX2, LOC122421476, CMPK2, LOC122435198, AURKAIP1, LOC122453333, NDUFB7, LOC122454546, MRPS34, IFI6, NDUFB1, MRPL14, PGS1, LOC122424937, SLC25A29, PRDX5, ATP5MJ, BID, ACSS1, LOC1224…	987	538	15361	1.59105	0.213384	0.0599824	0.0594468
KEGG_PATHWAY	ccad05140:Leishmaniasis	16	1.1486	0.000732538	MARCKSL1, TGFB1, NCF1, STAT1, LOC122430223, IFNGR2, LOC122429106, NCF4, LOC122431989, NFKBIA, IRAK1, LOC122429902, LOC122420817, MYD88, MAPK3, NFKBIB	665	93	10427	2.69758	0.214807	0.0057731	0.00462197
KEGG_PATHWAY	ccad05161:Hepatitis B	25	1.79469	0.000910264	LOC122446062, LOC122452766, ARAF, IFIH1, CREB3L3, IRAK1, CREB3L4, PTK2B, AKT1, IKBKG, BID, HRAS, MAPK3, TGFB1, STAT1, BAD, STAT2, NFKBIA, LOC122440231, IRF3, IRF7, BAX, LOC122440910, MYD88, ATF4	665	189	10427	2.07403	0.25957	0.00700691	0.00560977
KEGG_PATHWAY	ccad05163:Human cytomegalovirus infection	30	2.15363	0.00108045	LOC122446062, LOC122429686, LOC122429603, ADCY4, CGAS, GNAI2, CREB3L3, CREB3L4, RAC2, EIF4EBP1, PTK2B, AKT1, BAK1, IKBKG, RAC1, BID, HRAS, MAPK3, TAP2, TAP1, LOC122429593, TNFRSF1A, NFKBIA, LOC122440231, IRF3, STING1, GNB2, BAX, LOC122440910, ATF4	665	248	10427	1.89674	0.300047	0.00812796	0.00650728
GOTERM_MF_DIRECT	GO:0004298~threonine-type endopeptidase activity	5	0.358938	0.0011573	PSMB7, PSMB5, PSMB8, PSMB10, PSMB9	963	9	16442	9.4854	0.490894	0.337354	0.337354
KEGG_PATHWAY	ccad04622:RIG-I-like receptor signaling pathway	15	1.07681	0.00124979	LOC122452766, ISG15, ADAR, NFKBIA, IFIH1, CXCL10, ZNFX1, STING1, IRF3, DHX58, IRF7, PIN1, TRIM25, IKBKG, NFKBIB	665	88	10427	2.67268	0.338132	0.00919292	0.00735989
GOTERM_CC_DIRECT	GO:0031941~filamentous actin	6	0.430725	0.00132494	PDLIM1, SMTN, TGFB1I1, PDLIM4, PDLIM7, SMTNL1	987	14	15361	6.67	0.359481	0.0890362	0.0882413
KEGG_PATHWAY	ccad05221:Acute myeloid leukemia	13	0.933238	0.00141216	LOC122446062, SPI1, BAD, CEBPE, ARAF, PML, LOC122440231, EIF4EBP1, AKT1, LOC122440910, IKBKG, HRAS, MAPK3	665	70	10427	2.91194	0.372708	0.0101614	0.00813528
GOTERM_BP_DIRECT	GO:0034341~response to type II interferon	5	0.358938	0.00147173	LOC122431080, LOC122431078, LOC122431079, LOC122430804, LOC122431250	999	9	15999	8.89723	0.78063	0.151441	0.150411
KEGG_PATHWAY	ccad05212:Pancreatic cancer	14	1.00503	0.00151173	RALBP1, TGFB1, GADD45B, STAT1, BAD, ARAF, GADD45G, RAC2, BAX, AKT1, IKBKG, RAC1, BAK1, MAPK3	665	80	10427	2.74395	0.393013	0.0106464	0.00852359
GOTERM_CC_DIRECT	GO:0031410~cytoplasmic vesicle	10	0.717875	0.00164464	CD164L2, RUSC2, RUSC1, LOC122432541, RHOG, SNX33, ARAP1, RAC1, OCEL1, AP2M1	987	44	15361	3.53712	0.42481	0.0921001	0.0912777
KEGG_PATHWAY	ccad05216:Thyroid cancer	10	0.717875	0.00182141	LOC122446062, LOC122440231, GADD45B, PAX8, BAX, LOC122440910, BAK1, HRAS, GADD45G, MAPK3	665	45	10427	3.48438	0.452072	0.0125601	0.0100557
GOTERM_MF_DIRECT	GO:0001730~2'-5'-oligoadenylate synthetase activity	4	0.28715	0.00182635	LOC122422848, LOC122422854, LOC122422844, LOC122422833	963	5	16442	13.659	0.655527	0.354922	0.354922
GOTERM_BP_DIRECT	GO:0042981~regulation of apoptotic process	13	0.933238	0.00197023	LOC122433435, CARD9, CARD6, CIDEB, NOD1, LOC122449950, DEDD2, BCL2L12, CASP1, ANP32B, BAK1, TNFAIP8L2, BCL2L14	999	74	15999	2.81345	0.868841	0.184306	0.183053
KEGG_PATHWAY	ccad04620:Toll-like receptor signaling pathway	17	1.22039	0.00226267	LOC122446062, STAT1, STAT2, NFKBIA, CXCL10, LOC122440231, IRAK1, IRF3, IRF7, AKT1, LOC122440910, IRF5, IKBKG, RAC1, IRF9, MYD88, MAPK3	665	114	10427	2.3382	0.526463	0.0152845	0.0122369
KEGG_PATHWAY	ccad05165:Human papillomavirus infection	38	2.72793	0.00246816	LOC122446062, LOC122429686, LOC122429603, ITGA2B, TCIRG1, CREB3L3, CREB3L4, HEY2, EIF4EBP1, AKT1, BAK1, IKBKG, HRAS, HES4, MAPK3, ATP6V1F, BCAP31, ATP6V0B, ATP6V0E1, VWF, STAT1, BAD, MX2, STAT2, MX1, EIF2AK2, ISG15, LOC122429593, TNFRSF1A, LOC122440231, IRF3, IRF1, TADA3, BAX, LOC122440910, ATP6V0D1, ATP6V0C, IRF9	665	359	10427	1.65969	0.557582	0.0163392	0.0130813
KEGG_PATHWAY	ccad04668:TNF signaling pathway	18	1.29218	0.00257126	RIPK3, CSF1, RHBDF2, LIF, TNFRSF1A, ICAM1, NFKBIA, RPS6KA4, CXCL10, MMP14, CREB3L3, CREB3L4, IRF1, BCL3, AKT1, IKBKG, ATF4, MAPK3	665	126	10427	2.23996	0.572418	0.016688	0.0133605
GOTERM_MF_DIRECT	GO:0003735~structural constituent of ribosome	47	3.37401	0.00269417	RPL10, RPLP1, MRPS11, MRPS34, MRPL16, MRPL14, MRPL36, RPL8, MRPL12, MRPL54, MRPL55, LOC122420998, RPS15, LOC122450939, RPS14, RPL18A, RPL36AL, RPL36, RPS3, RPL14, RPLP2, RPL18, LOC122441834, RPS13, RPS12, LOC122429552, RPL21, LOC122451787, MRPS25, MRPS18A, MRPL28, RPL23A, MRPL24, MRPL46, MRPL43, MRPL52, RPS26, RPS28, LOC122428908, LOC122451081, LOC122434981, LOC122434165, RPL29, RPL28, UBA52, LOC…	963	514	16442	1.56122	0.792541	0.392676	0.392676
KEGG_PATHWAY	ccad04210:Apoptosis	21	1.50754	0.00305929	LOC122446062, GADD45B, BAD, LOC122426664, CTSZ, TNFRSF1A, GADD45G, NFKBIA, LOC122440231, DDIT3, LMNA, BAX, AKT1, CTSH, LOC122440910, IKBKG, BAK1, BID, HRAS, ATF4, MAPK3	665	161	10427	2.04518	0.636186	0.0192399	0.0154035
KEGG_PATHWAY	ccad04066:HIF-1 signaling pathway	19	1.36396	0.0030807	LOC122446062, EGLN2, IFNGR2, SERPINE1, ENO3, HK3, LOC122440231, MKNK1, EIF4EBP1, HMOX1, AKT1, LOC122440910, ALDOC, ELOB, TIMP1, LTBR, ALDOA, GAPDH, MAPK3	665	139	10427	2.14327	0.638756	0.0192399	0.0154035
GOTERM_BP_DIRECT	GO:0006886~intracellular protein transport	22	1.57933	0.00320433	NAPA, BCAP31, CD74, RAMP2, UNC93B1, STX8, LOC122432541, STXBP2, CLTB, SNX11, SNX33, STX11, COPZ1, RIMS1, ARL4A, SNX17, LOC122440025, TMED3, PICK1, AP1S1, AP1M2, AP2M1	999	176	15999	2.00188	0.963329	0.274771	0.272902
KEGG_PATHWAY	ccad04613:Neutrophil extracellular trap formation	25	1.79469	0.00356325	LOC122446062, HDAC5, SELPLG, NCF1, LOC122423300, LOC122425345, HDAC11, AQP9, NCF4, ITGA2B, LOC122449950, LOC122429181, CASP1, RAC2, AKT1, LOC122420817, RAC1, MAPK3, GSDMD, VWF, LOC122430223, LOC122440231, CLCN4, LOC122440910, SLC25A6	665	209	10427	1.87556	0.692098	0.0218186	0.0174681
KEGG_PATHWAY	ccad05203:Viral carcinogenesis	26	1.86648	0.00362545	HDAC5, LOC122429686, LOC122429603, HDAC11, CREB3L3, CREB3L4, BAK1, IKBKG, RAC1, HRAS, LOC122426418, MAPK3, LYN, BAD, EIF2AK2, LOC122429593, NFKB2, NFKBIA, KAT2A, IRF3, IRF7, BAX, LTBR, ATP6V0D1, IRF9, ATF4	665	221	10427	1.84467	0.698375	0.0218186	0.0174681
KEGG_PATHWAY	ccad05168:Herpes simplex virus 1 infection	43	3.08686	0.00371089	LOC122429686, LOC122429603, LOC122452766, LOC122429106, CGAS, IFIH1, IRAK1, ZNF768, EIF4EBP1, AKT1, LOC122429902, ZNF205, BAK1, IKBKG, LOC122422854, BID, LOC122422833, LOC122426418, CD74, EIF2B2, STAT1, BAD, ZNF282, IFNGR2, STAT2, CARD9, TAP2, EIF2AK2, TAP1, LOC122429593, PML, PPP1CA, TNFRSF1A, BST2, NFKBIA, LOC122422848, IRF3, STING1, IRF7, BAX, LOC122422844, MYD88, IRF9	665	431	10427	1.56433	0.706792	0.021934	0.0175605
GOTERM_BP_DIRECT	GO:0060700~regulation of ribonuclease activity	4	0.28715	0.00419641	LOC122422848, LOC122422854, LOC122422844, LOC122422833	999	6	15999	10.6767	0.986851	0.332162	0.329902
KEGG_PATHWAY	ccad05210:Colorectal cancer	15	1.07681	0.00424918	LOC122446062, TGFB1, GADD45B, BAD, ARAF, GADD45G, LOC122440231, RAC2, BAX, AKT1, LOC122440910, RAC1, BAK1, HRAS, MAPK3	665	100	10427	2.35195	0.754686	0.024675	0.0197549
KEGG_PATHWAY	ccad04062:Chemokine signaling pathway	23	1.65111	0.00465336	LYN, XCR1, NCF1, STAT1, BAD, LOC122428204, STAT2, ADCY4, GNAI2, NFKBIA, FGR, HCK, CXCL10, GNB2, RAC2, PTK2B, AKT1, IKBKG, RAC1, LOC122426789, HRAS, MAPK3, NFKBIB	665	190	10427	1.89807	0.785446	0.0265562	0.021261
GOTERM_MF_DIRECT	GO:0051015~actin filament binding	20	1.43575	0.0053905	MARCKSL1, AVIL, ARPC1B, ARPC1A, HIP1R, CAPG, ARPC4, AIF1, CORO1A, CORO1B, AIF1L, LIMD2, LOC122431989, PSTPIP1, CFL1, COTL1, HCLS1, LOC122426558, GAS2L1, SPTBN2	963	171	16442	1.99693	0.957198	0.628532	0.628532
KEGG_PATHWAY	ccad04071:Sphingolipid signaling pathway	17	1.22039	0.00666332	OPRD1, LOC122446062, FCER1G, SPHK2, SPHK1, TNFRSF1A, GNAI2, LOC122440231, SMPD1, RAC2, BAX, AKT1, LOC122440910, RAC1, BID, HRAS, MAPK3	665	127	10427	2.09886	0.889888	0.0373824	0.0299285
KEGG_PATHWAY	ccad05218:Melanoma	12	0.86145	0.0068217	LOC122446062, LOC122440231, GADD45B, BAD, ARAF, BAX, AKT1, LOC122440910, BAK1, HRAS, GADD45G, MAPK3	665	74	10427	2.54265	0.895532	0.037633	0.0301292
KEGG_PATHWAY	ccad04612:Antigen processing and presentation	14	1.00503	0.00698608	CD74, LOC122429686, LOC122429603, LOC122429106, HSPA6, TAP2, TAP1, RFXANK, IFI30, LOC122429593, PSME1, PSME2, LOC122429902, LOC122450370	665	95	10427	2.31069	0.901085	0.0379081	0.0303494
GOTERM_BP_DIRECT	GO:0016197~endosomal transport	8	0.5743	0.00713238	EHD1, EHD3, EHD4, BLOC1S1, SNX33, LAMTOR1, AP5B1, AP5S1	999	37	15999	3.46271	0.999372	0.52423	0.520664
KEGG_PATHWAY	ccad05417:Lipid and atherosclerosis	27	1.93826	0.00746292	NCF1, NCF4, LOC122436913, LOC122436914, ICAM1, IRAK1, CASP1, AKT1, LOC122420817, IKBKG, RAC1, BID, HRAS, MAPK3, LYN, XBP1, LOC122433435, BAD, HSPA6, TNFRSF1A, NFKBIA, IRF3, DDIT3, IRF7, BAX, MYD88, ATF4	665	246	10427	1.72094	0.915584	0.0398424	0.031898
GOTERM_CC_DIRECT	GO:0005665~RNA polymerase II, core complex	5	0.358938	0.00755637	POLR2F, POLR2G, POLR2I, POLR2J, POLR2L	987	13	15361	5.98589	0.921807	0.318735	0.315889
GOTERM_CC_DIRECT	GO:0033179~proton-transporting V-type ATPase, V0 domain	4	0.28715	0.00758893	ATP6V0B, ATP6V0E1, ATP6V0D1, ATP6V0C	987	7	15361	8.89333	0.922665	0.318735	0.315889
KEGG_PATHWAY	ccad04611:Platelet activation	17	1.22039	0.00831243	LYN, FCER1G, VWF, GP1BB, LOC122430223, ITGA2B, ADCY4, GP5, PTGS1, PPP1CA, GNAI2, VAMP8, GP9, P2RX1, AKT1, MAPK3, FERMT3	665	130	10427	2.05042	0.936363	0.0431035	0.0345089
KEGG_PATHWAY	ccad05223:Non-small cell lung cancer	12	0.86145	0.00833422	LOC122446062, LOC122440231, GADD45B, BAD, ARAF, BAX, AKT1, LOC122440910, BAK1, HRAS, GADD45G, MAPK3	665	76	10427	2.47574	0.936823	0.0431035	0.0345089
KEGG_PATHWAY	ccad04721:Synaptic vesicle cycle	13	0.933238	0.00879356	NAPA, ATP6V0B, ATP6V0E1, LOC122432541, CLTB, CACNA1A, TCIRG1, RIMS1, SLC6A9, ATP6V0D1, ATP6V0C, AP2M1, ATP6V1F	665	87	10427	2.34294	0.94578	0.0447795	0.0358507
KEGG_PATHWAY	ccad04064:NF-kappa B signaling pathway	15	1.07681	0.00912055	LYN, GADD45B, LOC122452766, RELB, TNFRSF1A, GADD45G, NFKB2, ICAM1, NFKBIA, IRAK1, CSNK2B, TRIM25, IKBKG, LTBR, MYD88	665	109	10427	2.15776	0.951374	0.0457409	0.0366204
GOTERM_CC_DIRECT	GO:0005751~mitochondrial respiratory chain complex IV	8	0.5743	0.00962499	C6H15ORF48, LOC122451077, LOC122431334, LOC122455265, LOC122421478, LOC122420491, LOC122422557, LOC122441380	987	38	15361	3.27649	0.961213	0.359333	0.356125
KEGG_PATHWAY	ccad00010:Glycolysis / Gluconeogenesis	12	0.86145	0.0100947	ALDH3A1, HK3, G6PC3, TPI1, ALDH3B1, AKR1A1, ALDOC, ACSS1, ALDOA, ENO3, GAPDH, PCK2	665	78	10427	2.41226	0.964851	0.0498706	0.0399266
GOTERM_CC_DIRECT	GO:0001725~stress fiber	7	0.502513	0.0108257	PDLIM1, TGFB1I1, ILK, GAS2L1, PDLIM4, MYL9, PDLIM7	987	30	15361	3.63144	0.974197	0.359877	0.356664
GOTERM_BP_DIRECT	GO:0015833~peptide transport	3	0.215363	0.0111783	TAP2, TAP1, ABCB9	999	3	15999	16.015	0.999991	0.718906	0.714016
GOTERM_BP_DIRECT	GO:0034354~'de novo' NAD biosynthetic process from tryptophan	3	0.215363	0.0111783	HAAO, IDO2, IDO1	999	3	15999	16.015	0.999991	0.718906	0.714016
GOTERM_CC_DIRECT	GO:0005783~endoplasmic reticulum	32	2.2972	0.0117817	PPP1R15A, TOR2A, LOC122448282, KDELR1, MGST3, ZFAND2B, PLD4, ZDHHC24, PLOD1, ZDHHC3, APH1A, LOC122440025, TMED3, INPP5K, TSPO, SDF4, BCAP31, ELOVL1, SSR4, RSAD2, SSR2, SHISA5, ZDHHC12, ALG3, MANF, MGAT4B, TMBIM1, ERP29, PIGL, ERGIC3, RNF185, GRINA	987	315	15361	1.58104	0.981355	0.359877	0.356664
GOTERM_MF_DIRECT	GO:0070181~small ribosomal subunit rRNA binding	4	0.28715	0.0128527	RPS14, MRPS11, MRPS18A, RPS13	963	9	16442	7.58832	0.999469	1	1
KEGG_PATHWAY	ccad04010:MAPK signaling pathway	31	2.22541	0.0130316	LOC122446062, CSF1, ARAF, HSPB1, CACNA1A, RASGRP4, RELB, RPS6KA4, RRAS, IRAK1, MKNK1, RAC2, AKT1, IKBKG, RAC1, HRAS, MAPK3, DUSP2, TGFB1, GADD45B, HSPA6, GADD45G, NFKB2, TNFRSF1A, LOC122440231, MAPKAPK3, DDIT3, LOC122440910, MYD88, MAP3K11, ATF4	665	308	10427	1.57815	0.986815	0.0634334	0.050785
KEGG_PATHWAY	ccad05215:Prostate cancer	14	1.00503	0.0134835	LOC122446062, BAD, ARAF, NFKBIA, LOC122440231, CREB3L3, CREB3L4, AKT1, LOC122440910, IKBKG, LOC122431193, HRAS, ATF4, MAPK3	665	103	10427	2.13122	0.988665	0.0646819	0.0517846
GOTERM_BP_DIRECT	GO:0007229~integrin-mediated signaling pathway	8	0.5743	0.014275	FGR, SEMA7A, ADAM15, ITGA2B, ZYX, ILK, PRAM1, FERMT3	999	42	15999	3.05048	1	0.828659	0.823022
KEGG_PATHWAY	ccad04137:Mitophagy - animal	16	1.1486	0.0148754	FIS1, RAB5C, MTX1, TFE3, TFEB, TOMM40L, MAP1LC3A, UBB, RRAS, LOC122438821, CSNK2B, HRAS, UBA52, MON1A, OPTN, ATF4	665	127	10427	1.9754	0.992887	0.0703396	0.0563142
GOTERM_MF_DIRECT	GO:0035615~clathrin adaptor activity	5	0.358938	0.0150233	LOC122432541, HIP1R, AP1S1, AP1M2, AP2M1	963	17	16442	5.02168	0.999853	1	1
GOTERM_BP_DIRECT	GO:0061061~muscle structure development	4	0.28715	0.0153008	PDLIM1, TGFB1I1, PDLIM4, PDLIM7	999	9	15999	7.11778	1	0.828659	0.823022
GOTERM_BP_DIRECT	GO:0034097~response to cytokine	4	0.28715	0.0153008	MAPKAPK3, SELL, NFKB2, RELB	999	9	15999	7.11778	1	0.828659	0.823022
KEGG_PATHWAY	ccad05142:Chagas disease	15	1.07681	0.0153336	C1QB, C1QA, TGFB1, IFNGR2, SERPINE1, TNFRSF1A, GNAI2, NFKBIA, GNA15, IRAK1, AKT1, IKBKG, MYD88, MAPK3, C1QC	665	116	10427	2.02755	0.993899	0.071485	0.0572312
KEGG_PATHWAY	ccad04722:Neurotrophin signaling pathway	16	1.1486	0.0158969	LOC122446062, BAD, NFKBIA, LOC122440231, IRAK1, ARHGDIB, BAX, AKT1, LOC122440910, RAC1, NFKBIE, HRAS, SH2B2, ATF4, MAPK3, NFKBIB	665	128	10427	1.95996	0.994949	0.0730814	0.0585093
GOTERM_CC_DIRECT	GO:0005788~endoplasmic reticulum lumen	5	0.358938	0.0164925	TOR4A, TOR3A, TOR2A, SELENOM, ERP29	987	16	15361	4.86354	0.996256	0.46179	0.457667
KEGG_PATHWAY	ccad05145:Toxoplasmosis	16	1.1486	0.0169714	TGFB1, STAT1, BAD, IFNGR2, LOC122429106, HSPA6, TNFRSF1A, GNAI2, NFKBIA, IRAK1, AKT1, LOC122429902, IKBKG, MYD88, MAPK3, NFKBIB	665	129	10427	1.94477	0.996478	0.0769527	0.0616087
GOTERM_CC_DIRECT	GO:0005743~mitochondrial inner membrane	15	1.07681	0.0189197	SLC27A1, NDUFA3, LOC122426554, MTLN, SLC25A38, COQ4, OXA1L, SMDT1, LOC122441435, SLC25A19, TIMM17A, LOC122421476, LOC122455265, LOC122422557, SLC25A6	987	118	15361	1.97839	0.998368	0.489002	0.484636
GOTERM_MF_DIRECT	GO:0015421~ABC-type oligopeptide transporter activity	3	0.215363	0.0189568	TAP2, TAP1, ABCB9	963	4	16442	12.8053	0.999986	1	1
GOTERM_MF_DIRECT	GO:0004888~transmembrane signaling receptor activity	11	0.789663	0.0194475	CD79B, LMBR1L, TREML1, LAG3, LOC122433864, LOC122430223, NFAM1, LOC122434135, CD300LF, FCGR2B, LOC122433947	963	81	16442	2.31865	0.999989	1	1
GOTERM_BP_DIRECT	GO:0071222~cellular response to lipopolysaccharide	7	0.502513	0.0198887	CD274, CXCL10, TNIP1, TNIP2, LOC122428204, NFKBIE, NFKBIB	999	35	15999	3.203	1	1	0.994163
GOTERM_CC_DIRECT	GO:0015629~actin cytoskeleton	11	0.789663	0.0211332	PARVG, CALD1, AVIL, ARPC1B, CFL1, ARPC1A, DENND2A, CAPG, ARPC4, LOC122426558, LIMD2	987	75	15361	2.28262	0.999236	0.504149	0.499648
GOTERM_BP_DIRECT	GO:0043113~receptor clustering	3	0.215363	0.0214337	MAGI2, PICK1, AGRN	999	4	15999	12.0113	1	1	0.994163
GOTERM_MF_DIRECT	GO:0030295~protein kinase activator activity	6	0.430725	0.021677	MOB3C, LOC122428908, RPLP1, MOB2, LOC122441834, MOB3A	963	28	16442	3.65866	0.999997	1	1
GOTERM_MF_DIRECT	GO:0030145~manganese ion binding	5	0.358938	0.0223007	ARG2, NPEPL1, LOC122432410, LAP3, PCK2	963	19	16442	4.49309	0.999998	1	1
GOTERM_CC_DIRECT	GO:0000815~ESCRT III complex	4	0.28715	0.0225067	CHMP1A, CHMP2A, CHMP4B, CHMP4A	987	10	15361	6.22533	0.999523	0.504149	0.499648
GOTERM_MF_DIRECT	GO:0042605~peptide antigen binding	4	0.28715	0.0231278	LOC122429598, LOC122429686, LOC122429603, LOC122429593	963	11	16442	6.20863	0.999999	1	1
GOTERM_MF_DIRECT	GO:0051371~muscle alpha-actinin binding	4	0.28715	0.0231278	PDLIM1, TGFB1I1, PDLIM4, PDLIM7	963	11	16442	6.20863	0.999999	1	1
KEGG_PATHWAY	ccad04926:Relaxin signaling pathway	16	1.1486	0.0232007	LOC122446062, TGFB1, ADCY4, RXFP4, GNAI2, NFKBIA, GNA15, LOC122440231, CREB3L3, CREB3L4, GNB2, AKT1, LOC122440910, HRAS, ATF4, MAPK3	665	134	10427	1.8722	0.999568	0.101367	0.0811545
KEGG_PATHWAY	ccad04371:Apelin signaling pathway	18	1.29218	0.0232462	LOC122446062, HDAC5, SPHK2, SPHK1, SERPINE1, ADCY4, PRKAG1, GNAI2, LIPE, LOC122440231, MAP1LC3A, RRAS, GNB2, AKT1, LOC122440910, CCN2, HRAS, MAPK3	665	158	10427	1.78629	0.999574	0.101367	0.0811545
KEGG_PATHWAY	ccad04730:Long-term depression	10	0.717875	0.0232745	LYN, GNAZ, LOC122446062, LOC122440231, ARAF, CACNA1A, LOC122440910, HRAS, MAPK3, GNAI2	665	66	10427	2.37571	0.999578	0.101367	0.0811545
GOTERM_BP_DIRECT	GO:0006880~intracellular sequestering of iron ion	6	0.430725	0.0239579	LOC122438238, LOC122442443, LOC122426323, LOC122427539, LOC122438195, FTL	999	27	15999	3.55889	1	1	0.994163
GOTERM_MF_DIRECT	GO:0008198~ferrous iron binding	7	0.502513	0.0246323	EGLN2, LOC122438238, LOC122442443, LOC122426323, LOC122427539, LOC122438195, FTL	963	39	16442	3.06452	1	1	1
GOTERM_CC_DIRECT	GO:0030479~actin cortical patch	5	0.358938	0.0250437	BIN3, GMFG, CFL1, HIP1R, LOC122426558	987	18	15361	4.32315	0.999801	0.525918	0.521222
KEGG_PATHWAY	ccad04723:Retrograde endocannabinoid signaling	18	1.29218	0.0259114	NDUFA8, NDUFB9, NDUFA13, NDUFB7, NDUFB10, NDUFB11, NDUFA12, NDUFA3, ADCY4, CACNA1A, NDUFB1, GNAI2, RIMS1, NDUFS8, NDUFS7, GNB2, NDUFS3, MAPK3	665	160	10427	1.76397	0.999827	0.111385	0.0891755
KEGG_PATHWAY	ccad05230:Central carbon metabolism in cancer	11	0.789663	0.0277241	LOC122446062, HK3, G6PD, LOC122440231, AKT1, LOC122440910, SIRT6, HRAS, SLC16A3, MAPK3, SIRT3	665	79	10427	2.18325	0.999907	0.11765	0.094191
GOTERM_CC_DIRECT	GO:0032587~ruffle membrane	4	0.28715	0.0294967	EPS8L2, PLEKHO1, AIF1, AIF1L	987	11	15361	5.65939	0.999957	0.582993	0.577788
GOTERM_MF_DIRECT	GO:0070530~K63-linked polyubiquitin modification-dependent protein binding	4	0.28715	0.0295215	RNF31, TNIP2, IKBKG, OPTN	963	12	16442	5.69124	1	1	1
KEGG_PATHWAY	ccad05214:Glioma	11	0.789663	0.0299522	LOC122446062, LOC122440231, GADD45B, ARAF, BAX, AKT1, LOC122440910, BAK1, HRAS, GADD45G, MAPK3	665	80	10427	2.15596	0.999956	0.125496	0.100473
GOTERM_MF_DIRECT	GO:0070573~metallodipeptidase activity	3	0.215363	0.0303771	LOC122421341, DPEP1, CNDP2	963	5	16442	10.2442	1	1	1
GOTERM_MF_DIRECT	GO:0008199~ferric iron binding	6	0.430725	0.0324704	LOC122438238, LOC122442443, LOC122426323, LOC122427539, LOC122438195, FTL	963	31	16442	3.30459	1	1	1
GOTERM_MF_DIRECT	GO:0046961~proton-transporting ATPase activity, rotational mechanism	6	0.430725	0.0324704	ATP6V0B, ATP6V0E1, TCIRG1, ATP6V0D1, ATP6V0C, ATP6V1F	963	31	16442	3.30459	1	1	1
GOTERM_BP_DIRECT	GO:0002218~activation of innate immune response	3	0.215363	0.034256	LOC122431238, STING1, CGAS	999	5	15999	9.60901	1	1	0.994163
GOTERM_BP_DIRECT	GO:0043065~positive regulation of apoptotic process	8	0.5743	0.0344673	ING4, MTCH1, MTCH2, SPHK2, DAPK2, BAX, PHLDA1, MAP3K11	999	50	15999	2.5624	1	1	0.994163
KEGG_PATHWAY	ccad04664:Fc epsilon RI signaling pathway	10	0.717875	0.0354446	LYN, LOC122446062, LOC122440231, FCER1G, RAC2, AKT1, LOC122440910, RAC1, HRAS, MAPK3	665	71	10427	2.20841	0.999993	0.146652	0.11741
KEGG_PATHWAY	ccad04140:Autophagy - animal	20	1.43575	0.0368339	LOC122446062, BAD, MTMR14, DAPK2, WIPI2, VAMP8, LOC122440231, MAP1LC3A, UBB, LAMP1, RRAS, ATG101, PLEKHM1, AKT1, LOC122440910, HRAS, UBA52, RAB8A, OPTN, MAPK3	665	192	10427	1.6333	0.999996	0.150519	0.120506
KEGG_PATHWAY	ccad01230:Biosynthesis of amino acids	11	0.789663	0.0373906	ARG2, SDS, TPI1, LOC122432410, TALDO1, ALDOC, PYCR3, ALDOA, TKT, ENO3, GAPDH	665	83	10427	2.07803	0.999997	0.15093	0.120836
KEGG_PATHWAY	ccad00030:Pentose phosphate pathway	6	0.430725	0.0390823	G6PD, TALDO1, ALDOC, PGLS, ALDOA, TKT	665	30	10427	3.13594	0.999998	0.155858	0.124781
GOTERM_BP_DIRECT	GO:0006879~intracellular iron ion homeostasis	7	0.502513	0.0402571	LOC122438238, LOC122442443, LOC122426323, LOC122427539, LOC122438195, BOLA2B, FTL	999	41	15999	2.73427	1	1	0.994163
KEGG_PATHWAY	ccad04218:Cellular senescence	18	1.29218	0.0427868	LOC122446062, LOC122429686, TGFB1, LIN37, LOC122429603, GADD45B, SERPINE1, LOC122429593, PPP1CA, GADD45G, LOC122440231, RRAS, EIF4EBP1, AKT1, LOC122440910, HRAS, MAPK3, SLC25A6	665	170	10427	1.6602	0.999999	0.1686	0.134982
GOTERM_BP_DIRECT	GO:0051014~actin filament severing	4	0.28715	0.0432443	AVIL, CFL1, CAPG, LOC122426558	999	13	15999	4.9277	1	1	0.994163
KEGG_PATHWAY	ccad04650:Natural killer cell mediated cytotoxicity	16	1.1486	0.0472652	LOC122446062, LOC122429598, FCER1G, IFNGR2, ARAF, ICAM1, LOC122440231, SH3BP2, RAC2, PTK2B, LOC122440910, RAC1, BID, HCST, HRAS, MAPK3	665	147	10427	1.70663	1	0.184056	0.147356
KEGG_PATHWAY	ccad04910:Insulin signaling pathway	17	1.22039	0.0483428	LOC122446062, BAD, PRKAG1, ARAF, PPP1CA, LIPE, HK3, LOC122440231, G6PC3, MKNK1, EIF4EBP1, AKT1, LOC122440910, HRAS, SH2B2, MAPK3, PCK2	665	160	10427	1.66597	1	0.186063	0.148963
GOTERM_MF_DIRECT	GO:0003950~NAD+ ADP-ribosyltransferase activity	5	0.358938	0.0485884	PARP10, ART1, LOC122449425, PARP9, PARP12	963	24	16442	3.55703	1	1	1
GOTERM_BP_DIRECT	GO:0010950~positive regulation of endopeptidase activity	3	0.215363	0.0492858	PSME1, PSME2, LOC122450370	999	6	15999	8.00751	1	1	0.994163
GOTERM_BP_DIRECT	GO:2000045~regulation of G1/S transition of mitotic cell cycle	3	0.215363	0.0492858	PSME1, PSME2, LOC122450370	999	6	15999	8.00751	1	1	0.994163
GOTERM_CC_DIRECT	GO:0005811~lipid droplet	6	0.430725	0.0513268	ABHD4, RSAD2, PLIN3, PLIN2, DHRS3, PNPLA2	987	32	15361	2.91812	1	0.878627	0.870782
GOTERM_BP_DIRECT	GO:0007507~heart development	6	0.430725	0.0519204	PDLIM1, ACVRL1, HSPB7, CCM2, PDLIM4, PDLIM7	999	33	15999	2.91182	1	1	0.994163
GOTERM_CC_DIRECT	GO:0008537~proteasome activator complex	3	0.215363	0.0519293	PSME1, PSME2, LOC122450370	987	6	15361	7.78166	1	0.878627	0.870782
GOTERM_CC_DIRECT	GO:0005829~cytosol	64	4.5944	0.0522992	TP53RK, IFIT5, ARAF, CGAS, IFIT3, CNDP2, IFIT2, LIPE, HK3, MAP1LC3A, QARS1, GUK1, ARHGDIB, RACK1, LGALS9, UPP1, LOC122422854, AP5S1, UBL7, G6PD, GPX1, TPI1, AKR1A1, WIPI2, MIF4GD, LOC122422848, PTRH2, SELENOW, PLIN3, LOC122429517, MVD, PLIN2, ALDOC, RIN3, ALDOA, LOC122431193, LOC122422844, LOC122453333, CSTB, AHCY, BOLA2B, RNF213, PSMB2, BAG1, MVB12A, BID, LCMT1, LOC122438172, LOC122422833, PCK2,…	987	800	15361	1.24507	1	0.878627	0.870782
GOTERM_MF_DIRECT	GO:0035091~phosphatidylinositol binding	9	0.646088	0.0547761	NCF1, SNX17, NCF4, SNX15, TOM1, SNX11, SNX33, ZCCHC2, PARD3B	963	71	16442	2.16428	1	1	1
KEGG_PATHWAY	ccad04610:Complement and coagulation cascades	11	0.789663	0.0558987	C1QB, C1QA, LOC122425619, VWF, C1S, SERPINC1, C1R, SERPINE1, SERPING1, C2, C1QC	665	89	10427	1.93794	1	0.212672	0.170266
GOTERM_BP_DIRECT	GO:0007165~signal transduction	29	2.08184	0.0567951	LMBR1L, ECM1, ARAF, LSP1, NDRG1, LOC122420192, AKAP12, ARHGAP21, RRAS, RASSF4, IMPA2, SH3BP2, TOM1, CCN2, MAGI2, ARHGAP28, ARAP1, ANK3, ARHGAP26, VRK3, MOB3A, MOB3C, SNX17, MOB2, SAG, RIN3, PKN1, NFKBIE, NFKBIB	999	328	15999	1.41596	1	1	0.994163
GOTERM_MF_DIRECT	GO:0031386~protein tag activity	6	0.430725	0.0568364	UBL5, UBB, URM1, NEDD8, LOC122427509, UBA52	963	36	16442	2.84562	1	1	1
KEGG_PATHWAY	ccad01200:Carbon metabolism	15	1.07681	0.0589989	G6PD, SDS, TPI1, MDH2, TALDO1, SDHC, ENO3, SDHB, HK3, ALDOC, PGLS, ALDOA, TKT, ACSS1, GAPDH	665	139	10427	1.69205	1	0.22121	0.177102
GOTERM_MF_DIRECT	GO:0004620~phospholipase activity	3	0.215363	0.0590066	LOC122422020, ABHD16A, PLBD2	963	7	16442	7.31731	1	1	1
GOTERM_MF_DIRECT	GO:0061133~endopeptidase activator activity	3	0.215363	0.0590066	PSME1, PSME2, LOC122450370	963	7	16442	7.31731	1	1	1
GOTERM_BP_DIRECT	GO:0009306~protein secretion	5	0.358938	0.0590165	RAB3B, RAB43, ERP29, PREB, RAB8A	999	24	15999	3.33646	1	1	0.994163
GOTERM_BP_DIRECT	GO:0006096~glycolytic process	5	0.358938	0.0590165	HK3, TPI1, ALDOC, ALDOA, ENO3	999	24	15999	3.33646	1	1	0.994163
GOTERM_BP_DIRECT	GO:0043123~positive regulation of canonical NF-kappaB signal transduction	7	0.502513	0.0592659	CARD9, SHISA5, S100A4, IKBKG, LTBR, RBCK1, MYD88	999	45	15999	2.49122	1	1	0.994163
KEGG_PATHWAY	ccad04211:Longevity regulating pathway	11	0.789663	0.0594794	CREB3L3, ATG101, CREB3L4, SESN2, ADCY4, EIF4EBP1, PRKAG1, BAX, AKT1, HRAS, ATF4	665	90	10427	1.91641	1	0.22121	0.177102
KEGG_PATHWAY	ccad04966:Collecting duct acid secretion	6	0.430725	0.0620932	ATP6V0E1, TCIRG1, ATP6V0D1, ATP6V0C, SLC12A7, ATP6V1F	665	34	10427	2.76701	1	0.228365	0.18283
GOTERM_BP_DIRECT	GO:0006904~vesicle docking involved in exocytosis	4	0.28715	0.0627457	RAB3B, RAB43, STXBP2, RAB8A	999	15	15999	4.27067	1	1	0.994163
GOTERM_MF_DIRECT	GO:0005525~GTP binding	29	2.08184	0.0641909	RAB3B, GNAZ, RAB5C, RAB1B, ARL2, GNAI2, LOC122436717, RAB43, TUBB6, RRAS, NKIRAS2, RAC2, RAC1, HRAS, RAB8A, PCK2, RAB4B, MX2, LOC122426664, MX1, RHOG, RHOC, GTPBP2, RAB33A, EHD1, ARL4A, EHD3, EHD4, RAB38	963	354	16442	1.3987	1	1	1
GOTERM_BP_DIRECT	GO:0006826~iron ion transport	6	0.430725	0.0642091	LOC122438238, LOC122442443, LOC122426323, LOC122427539, LOC122438195, FTL	999	35	15999	2.74543	1	1	0.994163
GOTERM_BP_DIRECT	GO:0010629~negative regulation of gene expression	3	0.215363	0.0661983	PARP10, LOC122447612, PARP9	999	7	15999	6.86358	1	1	0.994163
GOTERM_BP_DIRECT	GO:0016239~positive regulation of macroautophagy	3	0.215363	0.0661983	STING1, RUFY4, SESN2	999	7	15999	6.86358	1	1	0.994163
GOTERM_BP_DIRECT	GO:0032543~mitochondrial translation	5	0.358938	0.0669304	MRPL52, MRPS34, MRPL16, MRPS18A, MRPL43	999	25	15999	3.203	1	1	0.994163
GOTERM_CC_DIRECT	GO:0022625~cytosolic large ribosomal subunit	23	1.65111	0.0673134	LOC122429552, RPL10, RPL21, LOC122451787, RPLP1, RPL23A, RPL8, LOC122420998, LOC122450939, LOC122428908, RPL18A, RPL36AL, LOC122451081, RPL14, RPL36, RPLP2, LOC122434165, RPL18, RPL29, RPL28, LOC122441834, LOC122423218, LOC122439670	987	244	15361	1.46703	1	1	0.99403
GOTERM_MF_DIRECT	GO:0046983~protein dimerization activity	15	1.07681	0.0673996	ARNT2, LOC122447382, TFE3, TFEB, OLIG1, USF2, USF1, MNT, RILPL2, TAL1, HEY2, ZBED1, POLR2J, HES4, MXD4	963	154	16442	1.66303	1	1	1
GOTERM_MF_DIRECT	GO:0005102~signaling receptor binding	11	0.789663	0.0674155	MPP1, LYN, FGR, LOC122429598, HCK, LOC122429686, LOC122429603, PTK6, CNPY3, HCST, LOC122429593	963	100	16442	1.87811	1	1	1
KEGG_PATHWAY	ccad04659:Th17 cell differentiation	13	0.933238	0.0686276	TGFB1, STAT1, IFNGR2, LOC122429106, EBI3, LOC122448005, IL27, NFKBIA, LOC122429902, IKBKG, NFKBIE, MAPK3, NFKBIB	665	117	10427	1.74219	1	0.247609	0.198237
KEGG_PATHWAY	ccad00051:Fructose and mannose metabolism	6	0.430725	0.068822	HK3, TPI1, PMM1, ALDOC, GFUS, ALDOA	665	35	10427	2.68795	1	0.247609	0.198237
GOTERM_CC_DIRECT	GO:0005789~endoplasmic reticulum membrane	23	1.65111	0.0696933	BCAP31, ELOVL1, WDR83OS, GRAMD1A, JAGN1, SLC37A2, PGAP2, RSAD2, TEX264, RHBDF2, TAP2, FITM1, TEX261, LMF1, ABHD12, SELENON, DPM2, DPM3, STING1, ORMDL2, PREB, ERGIC3, TKT	987	245	15361	1.46105	1	1	0.99403
KEGG_PATHWAY	ccad05219:Bladder cancer	7	0.502513	0.0699536	LOC122446062, LOC122440231, DAPK2, ARAF, LOC122440910, HRAS, MAPK3	665	46	10427	2.38604	1	0.248975	0.19933
GOTERM_CC_DIRECT	GO:0005764~lysosome	10	0.717875	0.0700554	CLN3, DRAM1, UNC93B1, SMPD1, CTSZ, CTSH, LAMTOR1, IFI30, LAMTOR4, AP5S1	987	80	15361	1.94542	1	1	0.99403
GOTERM_BP_DIRECT	GO:0006123~mitochondrial electron transport, cytochrome c to oxygen	7	0.502513	0.0704732	LOC122451077, LOC122431334, LOC122455265, LOC122421478, LOC122420491, LOC122422557, LOC122441380	999	47	15999	2.38522	1	1	0.994163
GOTERM_BP_DIRECT	GO:0042147~retrograde transport, endosome to Golgi	6	0.430725	0.0709129	RGP1, SLC66A2, VPS51, LOC122432783, DENND2A, WASHC1	999	36	15999	2.66917	1	1	0.994163
GOTERM_MF_DIRECT	GO:0003779~actin binding	11	0.789663	0.0711046	PDLIM1, PARVG, CALD1, TGFB1I1, GMFG, SPIRE2, EPS8L2, LSP1, WASHC1, PDLIM4, PDLIM7	963	101	16442	1.85951	1	1	1
KEGG_PATHWAY	ccad05225:Hepatocellular carcinoma	18	1.29218	0.0720075	LOC122446062, TGFB1, GADD45B, BAD, MGST3, ARAF, LOC122446364, GADD45G, LOC122440231, BAX, HMOX1, AKT1, LOC122429517, LOC122440910, BAK1, LOC122431193, HRAS, MAPK3	665	182	10427	1.55074	1	0.253558	0.203
GOTERM_MF_DIRECT	GO:0003727~single-stranded RNA binding	4	0.28715	0.0735404	IFIH1, LOC122452766, DHX58, POLR2G	963	17	16442	4.01735	1	1	1
GOTERM_MF_DIRECT	GO:0047372~acylglycerol lipase activity	3	0.215363	0.0756908	ABHD12, ABHD16A, ABHD1	963	8	16442	6.40265	1	1	1
KEGG_PATHWAY	ccad03020:RNA polymerase	6	0.430725	0.0759373	LOC122447382, POLR2F, POLR2G, POLR2I, POLR2J, POLR2L	665	36	10427	2.61328	1	0.264581	0.211825
GOTERM_BP_DIRECT	GO:0006897~endocytosis	7	0.502513	0.0765036	RALBP1, NECAP2, EHD3, BIN3, HIP1R, SNX33, EPN1	999	48	15999	2.33552	1	1	0.994163
KEGG_PATHWAY	ccad05150:Staphylococcus aureus infection	12	0.86145	0.0779413	C1QB, C1QA, SELPLG, C1S, C1R, LOC122430223, LOC122429106, LOC122429902, FCGR2B, ICAM1, C2, C1QC	665	107	10427	1.75847	1	0.268735	0.21515
GOTERM_CC_DIRECT	GO:0005771~multivesicular body	4	0.28715	0.0789699	CHMP1A, CHMP2A, CHMP4B, CHMP4A	987	16	15361	3.89083	1	1	0.99403
GOTERM_CC_DIRECT	GO:0005840~ribosome	37	2.65614	0.0797903	RPL10, RPLP1, MRPS11, MRPL16, MRPL14, MRPL36, RPL8, MRPL12, LOC122420998, RPS15, LOC122450939, RPS14, RPL18A, RPL36AL, RPL36, RPL14, RPLP2, RPL18, LOC122441834, RPS13, RPS12, LOC122429552, RPL21, LOC122451787, MRPS18A, RPL23A, MRPL24, RPS26, RPS28, LOC122428908, LOC122451081, LOC122434165, RPL29, RPL28, UBA52, LOC122423218, LOC122439670	987	440	15361	1.30873	1	1	0.99403
KEGG_PATHWAY	ccad05416:Viral myocarditis	10	0.717875	0.0806672	LOC122429686, LOC122429603, LOC122429106, RAC2, LOC122429902, RAC1, BID, LOC122429593, SNTA1, ICAM1	665	83	10427	1.88912	1	0.273039	0.218596
KEGG_PATHWAY	ccad04068:FoxO signaling pathway	14	1.00503	0.0808394	LOC122446062, TGFB1, GADD45B, PRKAG1, ARAF, GADD45G, LOC122440231, G6PC3, AKT1, LOC122440910, HOMER3, HRAS, MAPK3, PCK2	665	133	10427	1.65049	1	0.273039	0.218596
GOTERM_BP_DIRECT	GO:0006412~translation	32	2.2972	0.0820135	RPL10, MRPS11, MRPL14, MRPL36, MRPL12, MRPL55, LOC122420998, RPS15, LOC122450939, RPS14, RPL18A, QARS1, RPL36AL, RPS3, RPL14, RPL18, RPS13, RPS12, LOC122429552, MRPS24, RPL21, LOC122451787, RPL23A, MRPL24, RPS26, RPS28, LOC122451081, LOC122434981, LOC122434165, RPL28, UBA52, LOC122423218	999	383	15999	1.33807	1	1	0.994163
KEGG_PATHWAY	ccad05323:Rheumatoid arthritis	12	0.86145	0.0820671	ATP6V0B, TGFB1, ATP6V0E1, CSF1, LOC122429106, LOC122429902, LOC122445907, TCIRG1, ATP6V0D1, ATP6V0C, ATP6V1F, ICAM1	665	108	10427	1.74219	1	0.274386	0.219674
GOTERM_MF_DIRECT	GO:0003824~catalytic activity	4	0.28715	0.0845605	RSAD2, PGGHG, ABHD8, PLD4	963	18	16442	3.79416	1	1	1
GOTERM_MF_DIRECT	GO:0003899~DNA-directed 5'-3' RNA polymerase activity	4	0.28715	0.0845605	LOC122447382, POLR2F, POLR2I, POLR2L	963	18	16442	3.79416	1	1	1
GOTERM_BP_DIRECT	GO:0061136~regulation of proteasomal protein catabolic process	3	0.215363	0.0847007	PSME1, PSME2, LOC122450370	999	8	15999	6.00563	1	1	0.994163
GOTERM_BP_DIRECT	GO:0051604~protein maturation	3	0.215363	0.0847007	TSPAN14, TSPAN17, LMF1	999	8	15999	6.00563	1	1	0.994163
KEGG_PATHWAY	ccad03010:Ribosome	40	2.8715	0.0847413	RPL10, RPLP1, MRPS11, MRPL16, MRPL14, MRPL12, LOC122420998, RPS15, LOC122450939, LOC122439045, RPS14, RPL18A, RPL36AL, RPL36, RPS3, RPL14, RPLP2, LOC122439040, RPL18, LOC122441834, RPS13, RPS12, LOC122429552, RPL21, LOC122451787, MRPS18A, MRPL28, RPL23A, MRPL24, RPS26, RPS28, LOC122428908, LOC122451081, LOC122434981, LOC122434165, RPL29, RPL28, UBA52, LOC122423218, LOC122439670	665	489	10427	1.28259	1	0.279567	0.223822
KEGG_PATHWAY	ccad03250:Viral life cycle - HIV-1	10	0.717875	0.0855315	BST2, KAT2A, MX2, MX1, SUPT4H1, CHMP4B, PIN1, CHMP4A, APOBEC3A, APOBEC3B	665	84	10427	1.86663	1	0.279567	0.223822
GOTERM_CC_DIRECT	GO:0005884~actin filament	6	0.430725	0.0857807	PSTPIP1, COTL1, HCLS1, GAS2L1, AIF1, AIF1L	987	37	15361	2.52378	1	1	0.99403
KEGG_PATHWAY	ccad00562:Inositol phosphate metabolism	9	0.646088	0.0861504	ITPKC, ISYNA1, TPI1, IMPA2, MTMR14, ITPK1, INPP5K, PI4KB, CDIPT	665	72	10427	1.95996	1	0.279567	0.223822
GOTERM_MF_DIRECT	GO:0004715~non-membrane spanning protein tyrosine kinase activity	5	0.358938	0.0865667	LYN, FGR, HCK, FES, PTK6	963	29	16442	2.94375	1	1	1
GOTERM_CC_DIRECT	GO:0071986~Ragulator complex	3	0.215363	0.0890314	LAMTOR2, LAMTOR1, LAMTOR4	987	8	15361	5.83625	1	1	0.99403
GOTERM_BP_DIRECT	GO:0006366~transcription by RNA polymerase II	5	0.358938	0.0937356	DRAP1, CCDC124, ZNF768, POLR2J, POLR2L	999	28	15999	2.85982	1	1	0.994163
GOTERM_CC_DIRECT	GO:0030672~synaptic vesicle membrane	6	0.430725	0.0938318	SYNGR2, CLTB, DTNBP1, SYNGR4, SYN2, SYN1	987	38	15361	2.45737	1	1	0.99403
GOTERM_BP_DIRECT	GO:0007015~actin filament organization	9	0.646088	0.0947031	LOC122421209, MARCKSL1, RHOG, HIP1R, RAC1, TMSB10, CORO1A, CORO1B, LOC122431989	999	75	15999	1.9218	1	1	0.994163
GOTERM_BP_DIRECT	GO:1902600~proton transmembrane transport	8	0.5743	0.0963223	ATP6V0B, ATP6V0E1, ATP5MC2, TCIRG1, ATP6V0D1, ATP6V0C, ATP5MC1, ATP6V1F	999	63	15999	2.03365	1	1	0.994163
KEGG_PATHWAY	ccad04920:Adipocytokine signaling pathway	9	0.646088	0.0973767	NFKBIA, G6PC3, PRKAG1, AKT1, IKBKG, NFKBIE, TNFRSF1A, PCK2, NFKBIB	665	74	10427	1.90699	1	0.312929	0.250532
KEGG_PATHWAY	ccad04141:Protein processing in endoplasmic reticulum	19	1.36396	0.0996381	PPP1R15A, BCAP31, XBP1, LOC122448282, SSR4, SSR2, HSPA6, TMEM258, DAD1, DDIT3, BAG1, ERP29, BAX, PREB, FBXO6, BAK1, RNF185, UBXN6, ATF4	665	204	10427	1.46036	1	0.317117	0.253885

## Sheet: Suppl_table8_MF,BP, KEGG_DoDEG
Category	Term	Count	%	PValue	Genes	List Total	Pop Hits	Pop Total	Fold Enrichment	Bonferroni	Benjamini	FDR
GOTERM_CC_DIRECT	GO:0005634~nucleus	277	21.0646	6.03699e-20	RB1, TCERG1, GABPB2, CCNC, GABPB1, GPATCH8, CCAR1, ELK4, CHEK2, MYB, PCLAF, PWWP2A, FBXO5, LOC122453076, PRKAB2, TSPYL1, ARMT1, ESCO1, SFMBT2, DDX10, RFX3, YOD1, ESCO2, KNL1, RUNX2, WDR76, UHMK1, RRAGB, SUB1, ZNF711, SRFBP1, KIF20B, CLOCK, CCDC82, SET, CSTF3, TSHZ1, MYNN, GMCL1, ZBTB2, ZNHIT6, DHX36, HIVEP2, TRMT1L, SCAI, ZNF140, MAGEE2, DDIAS, SMARCA5, LOC122420285, CDC7, STAG1, STAG2, NOL11, LO…	942	2723	15361	1.65883	2.23368e-17	2.23368e-17	2.19746e-17
GOTERM_MF_DIRECT	GO:0005524~ATP binding	141	10.7224	4.00172e-14	EIF4A2, ERCC6L, ATP8A1, BUB1B, SMC5, SMC3, SMC4, SMC2, RPS6KA3, SMCHD1, DHX57, CHEK2, AKT3, NARS2, SMARCAD1, NEK1, MTREX, MAP3K7, CSNK1G3, PRKCH, RARS1, PRKCE, RECQL, DDX10, ATP11B, VRK1, RUNX2, CLPX, UHMK1, MSH6, KATNAL1, MSH2, PRKD3, MSH3, YME1L1, SIK2, TNIK, KIF20B, ATP6V1A, DDX5, DHX9, YTHDC2, GMPS, STK39, PIK3R4, HSP90B1, HLTF, DHX36, TRPM7, PLK4, HELQ, FANCM, ATP8B2, ABCA5, HSPA5, HSPA4, IN…	1051	1152	16442	1.91478	2.2462e-11	2.24897e-11	2.20094e-11
KEGG_PATHWAY	ccad04110:Cell cycle	37	2.81369	1.04479e-11	RB1, BUB1B, LOC122427080, TTK, PDS5B, SMC3, PDS5A, ORC5, CCNB3, ORC4, CCND2, CDC23, PPP2R1B, YWHAQ, PPP2R5E, CHEK2, RAD21, ORC2, CDC27, FBXO5, ESCO1, ATRX, CDC7, KNL1, ESCO2, WAPL, RBL2, STAG1, WEE1, STAG2, CDK1, ANAPC4, ATM, MCM6, ANAPC1, MAD2L1, ATR	585	178	10427	3.70497	3.32242e-09	3.32243e-09	3.27019e-09
KEGG_PATHWAY	ccad05168:Herpes simplex virus 1 infection	60	4.56274	1.03815e-10	ZNF132, ZNF175, ZNF250, LOC122421285, ZFP82, PPP1CB, PPP1CC, LOC122421408, LOC122420632, LOC122445535, ZNF606, AKT3, ZNF41, LOC122420719, ZNF569, LOC122420718, ZNF568, ZNF567, MAP3K7, ZFP1, APAF1, HCFC2, LOC122441347, LOC122420584, TRAF5, LOC122432320, LOC122421399, TLR3, ZNF157, LOC122421383, SRSF1, ZNF23, ZNF26, ZFP14, LOC122420697, LOC122440621, LOC122440466, LOC122421105, ZNF300, ZNF189, ZNF4…	585	431	10427	2.48129	3.30133e-08	1.65067e-08	1.62471e-08
GOTERM_MF_DIRECT	GO:0005515~protein binding	213	16.1977	1.48628e-08	PATJ, GABPB2, FRMPD4, LDLRAD3, SMC3, GABPB1, SMC4, RCBTB1, BACH2, SMC2, GLS, CDC23, PPP2R1B, DHX57, CHEK2, CDC27, FBXO5, WDHD1, WDR75, IFT80, HCFC2, CRNKL1, CDC40, WDR76, ARMC1, FNDC1, SPATA13, RELCH, KCTD12, AASDH, CSTF3, ZBTB1, MYNN, PIK3R4, GMCL1, ZBTB2, IL22RA2, C7, RAD21, PLCG1, CEP78, PLK4, BARD1, EIF2AK3, CPLANE1, EIF2AK4, PPFIBP1, ATM, NOL11, INTS8, ATR, ITK, MYOM1, SETD2, SMG1, SIPA1L2, …	1051	2320	16442	1.43629	8.35285e-06	4.17644e-06	4.08727e-06
KEGG_PATHWAY	ccad04218:Cellular senescence	28	2.12928	7.85663e-07	RB1, LIN54, MRE11, ITPR1, ITPR2, LOC122427080, LIN9, ETS1, FOXO1, CCNB3, PPP1CB, PPP1CC, NRAS, CCND2, RBBP4, CHEK2, AKT3, TRPM7, NBN, NFATC2, SIRT1, RBL2, RAD50, CDK1, KRAS, ATM, RAD1, ATR	585	170	10427	2.93571	0.00024981	8.32803e-05	8.19708e-05
GOTERM_CC_DIRECT	GO:0005813~centrosome	25	1.90114	5.9428e-06	CEP57, ROCK2, CEP120, CCNB3, IFT74, PCM1, CEP70, CEP78, LRRCC1, STIL, CEP350, CEP295, CEP152, SPICE1, IFT80, HAUS5, HOOK3, CKAP5, HOOK1, CENPJ, ALMS1, TUBGCP5, TRIM59, TUBGCP3, CLUAP1	942	143	15361	2.85084	0.00219643	0.00109942	0.00108159
GOTERM_CC_DIRECT	GO:0005814~centriole	14	1.06464	1.06803e-05	STIL, CEP295, CEP120, SPICE1, SCLT1, CCP110, NEDD1, MPHOSPH9, IFT88, PCM1, KIAA0586, CENPJ, ALMS1, CEP192	942	52	15361	4.39029	0.00394395	0.00131724	0.00129588
KEGG_PATHWAY	ccad04120:Ubiquitin mediated proteolysis	25	1.90114	1.6762e-05	CUL5, UBA6, CUL3, CUL2, LOC122427080, UBE3A, CBLB, BRCA1, HERC4, HERC3, HERC2, CDC23, UBR5, CDC27, MAP3K1, FANCL, WWP1, KLHL9, ITCH, UBE2N, UBA2, ANAPC4, BIRC6, TRIM37, ANAPC1	585	166	10427	2.68433	0.00531618	0.00133258	0.00131163
GOTERM_BP_DIRECT	GO:0006357~regulation of transcription by RNA polymerase II	107	8.13688	2.65558e-05	RB1, ZNF451, CCNT2, CCNT1, JMJD1C, RORA, AHR, IKZF2, ETS1, CARF, LOC122432813, BACH2, ELK4, LOC122421408, ZNF606, ZMIZ1, CREB3L2, SUPT20H, ZNF567, LOC122453076, ZBTB39, RFX3, ZBTB33, RUNX2, LOC122425718, TBL1XR1, RFX7, ZNF711, CLOCK, ZSCAN29, ZNF397, CBFB, TSHZ1, MYNN, ZNF24, FOXO1, ZBTB2, LOC122420697, ZKSCAN2, HIVEP2, LOC122435265, ZNF664, ZNF300, ZNF146, BPTF, ZNF660, TFAP2C, EGR3, ZNF140, ZBT…	1050	1094	15999	1.49029	0.0244206	0.0246969	0.024511
GOTERM_MF_DIRECT	GO:0016887~ATP hydrolysis activity	37	2.81369	2.78462e-05	ATP6V1A, ATP8A1, MCM8, ATP10D, SRP54, SMC5, SMC3, HSPA13, SMC4, HSP90B1, SMC2, ORC4, BTAF1, ASCC3, CCT8, PMS1, CCT2, ABCC4, ATAD5, ABCA5, ATP8B2, RFC1, HSPA5, ATAD2, ATP2B4, SMARCA5, ATP11B, KIF23, PEX1, CLPX, CCT6A, RAD50, ABCB10, KATNAL1, YME1L1, ATP13A3, ABCE1	1051	273	16442	2.12027	0.015528	0.0039788	0.00389384
GOTERM_MF_DIRECT	GO:0008017~microtubule binding	26	1.97719	2.83188e-05	CEP57, MACF1, ABRAXAS1, KIF11, KIF15, OPA1, NUSAP1, TOGARAM1, DNM1L, DLGAP5, CLASP2, GAS2L3, CEP350, HAUS6, KIF23, RMDN2, HOOK3, EML4, CENPF, KIF18A, KATNAL1, APC, KATNBL1, HOOK1, KIF20B, MDM1	1051	160	16442	2.54217	0.0157894	0.0039788	0.00389384
GOTERM_BP_DIRECT	GO:0071539~protein localization to centrosome	5	0.380228	8.7109e-05	PCM1, STIL, CCDC14, KIAA0753, CEP192	1050	5	15999	15.2371	0.0779004	0.0375275	0.037245
GOTERM_BP_DIRECT	GO:0034501~protein localization to kinetochore	6	0.456274	0.000121056	ZWILCH, MIS12, CHAMP1, TTK, SPDL1, KNL1	1050	9	15999	10.1581	0.106591	0.0375275	0.037245
GOTERM_MF_DIRECT	GO:0000978~RNA polymerase II cis-regulatory region sequence-specific DNA binding	82	6.23574	0.000126425	ZNF132, ZNF250, RORA, ZFP82, IKZF2, CARF, BACH2, LOC122432813, ZNF280D, LOC122421408, LOC122420632, NKRF, ZNF606, SNAPC3, POGZ, MYB, ZNF280C, LOC122421201, LOC122424239, ZNF644, ZNF567, MYBL1, LOC122421207, KDM6A, ZBTB39, ZFP1, TCF12, RFX3, ZBTB33, RUNX2, LOC122425718, LOC122420586, IRF4, RFX7, LOC122420584, LOC122432320, LOC122421399, ZSCAN29, ZNF397, HLF, SATB1, LEF1, MYNN, ZBTB43, ZNF24, FOXO1…	1051	841	16442	1.52535	0.0685898	0.0142102	0.0139068
GOTERM_MF_DIRECT	GO:0140658~ATP-dependent chromatin remodeler activity	10	0.760456	0.000162864	HELLS, ERCC6L, SHPRH, BTAF1, ERCC6L2, HLTF, ATRX, SMARCA5, SMARCAD1, RAD54B	1051	33	16442	4.74065	0.0874723	0.0152549	0.0149292
GOTERM_CC_DIRECT	GO:0005829~cytosol	75	5.70342	0.000227411	DENND1B, IPO11, MTRR, USP38, CSE1L, SRP54, LTN1, IDE, OSBPL11, MTO1, IPO7, IPO8, ATIC, PPIP5K2, PPP2R5E, PPP6R3, RIOK2, RIOK1, XYLB, NUDT12, USP46, USP47, USP8, CCT2, STARD4, USP7, HMGCS1, PDE4D, CEP295, YOD1, PEX1, LARP4B, DARS1, UGDH, PPM1B, NCBP3, ETF1, PPEF1, GART, UBA5, IREB2, USP12, GMPS, NLRC3, HSPA13, SCFD1, BAG5, LARP1, G3BP1, UBQLN1, G3BP2, USP1, IARS2, AASDHPPT, UBQLN2, USP24, OSBPL8, …	942	800	15361	1.52876	0.0807082	0.0210355	0.0206944
GOTERM_BP_DIRECT	GO:0007064~mitotic sister chromatid cohesion	7	0.532319	0.000234408	ESCO1, RAD21, DSCC1, ESCO2, PDS5B, PDS5A, SMC3	1050	15	15999	7.11067	0.196083	0.0544998	0.0540896
GOTERM_MF_DIRECT	GO:0004843~cysteine-type deubiquitinase activity	17	1.29278	0.000357999	USP46, USP24, USP47, USP14, USP8, USP37, USP15, USP7, USP16, USP38, USP53, USP9X, USP33, USP12, YOD1, OTULIN, USP1	1051	96	16442	2.77032	0.182277	0.0251494	0.0246124
GOTERM_MF_DIRECT	GO:0001227~DNA-binding transcription repressor activity, RNA polymerase II-specific	17	1.29278	0.000357999	ZNF175, ZFP1, LOC122421285, ZNF182, ZFP82, ZNF26, ZFP14, LOC122441347, LOC122420721, ZKSCAN7, LOC122420762, LOC122440466, ZNF569, LOC122432320, ZNF568, LOC122424879, ZNF445	1051	96	16442	2.77032	0.182277	0.0251494	0.0246124
KEGG_PATHWAY	ccad03440:Homologous recombination	10	0.760456	0.000430297	BARD1, RAD50, MRE11, ABRAXAS1, RBBP8, ATM, NBN, TOPBP1, BRCA1, RAD54B	585	42	10427	4.24379	0.127911	0.0273669	0.0269366
GOTERM_MF_DIRECT	GO:0003682~chromatin binding	19	1.44487	0.000484565	HELLS, WDHD1, PBRM1, TSPYL1, SET, ATAD2, ASH1L, POLA1, STAG1, STAG2, RAD21, MTF2, ASXL2, TASOR, PCLAF, PHF13, PWWP2A, SMARCAD1, TAF2	1051	118	16442	2.51897	0.238444	0.0302584	0.0296123
GOTERM_CC_DIRECT	GO:0000785~chromatin	15	1.14068	0.000542202	RB1, AKIRIN1, TSPYL1, SET, ESCO1, DSCC1, SMARCA5, JMJD1C, ESCO2, PDS5B, PDS5A, RBL2, STAG1, STAG2, MIS18A	942	84	15361	2.91193	0.181817	0.0401229	0.0394723
GOTERM_BP_DIRECT	GO:0017196~N-terminal peptidyl-methionine acetylation	5	0.380228	0.000547893	NAA30, NAA25, NAA35, NAA16, NAA15	1050	7	15999	10.8837	0.399641	0.101908	0.101141
KEGG_PATHWAY	ccad03013:Nucleocytoplasmic transport	21	1.59696	0.000655768	NDC1, IPO11, NUP133, NUP155, NCBP1, CSE1L, XPO7, NUP153, IPO7, NUP160, IPO8, XPOT, NUP50, TPR, NUP88, NUP43, KPNA4, KPNA5, TNPO1, KPNA3, NUP58	585	161	10427	2.32486	0.188282	0.0347557	0.0342092
GOTERM_MF_DIRECT	GO:0004674~protein serine/threonine kinase activity	24	1.8251	0.000716627	CSNK1G3, SMG1, MAST4, RIOK3, STK39, PIK3R4, VRK1, CDC7, TTK, CIT, UHMK1, LATS1, RPS6KB1, PRKD3, CHEK2, AKT3, PBK, TLK1, TRPM7, ATM, RIOK2, SIK2, RIOK1, ATR	1051	174	16442	2.15781	0.331614	0.0370051	0.0362149
GOTERM_MF_DIRECT	GO:0031267~small GTPase binding	15	1.14068	0.000724299	IPO11, CCDC186, DENND5B, ROCK2, CSE1L, XPO7, IPO7, SYTL2, IPO8, GOLGA4, FMNL2, XPOT, TRIP11, KNTC1, TNPO1	1051	83	16442	2.82726	0.334491	0.0370051	0.0362149
GOTERM_BP_DIRECT	GO:0000724~double-strand break repair via homologous recombination	12	0.912548	0.000757049	WRN, MRE11, RMI1, ERCC4, MCM8, RFWD3, RBBP8, RECQL, SMC5, NBN, BRCA1, RAD54B	1050	55	15999	3.32447	0.505931	0.117343	0.116459
GOTERM_BP_DIRECT	GO:0090307~mitotic spindle assembly	6	0.456274	0.00099068	ABRAXAS1, SPICE1, CEP192, KIF11, KIF20B, CLASP2	1050	13	15999	7.03253	0.602587	0.131619	0.130628
GOTERM_MF_DIRECT	GO:0008139~nuclear localization sequence binding	7	0.532319	0.00119212	NUP153, KPNA4, KPNA5, TNPO1, RANBP6, KPNA3, NUP58	1051	20	16442	5.47545	0.48848	0.0558308	0.0546387
GOTERM_BP_DIRECT	GO:0016579~protein deubiquitination	14	1.06464	0.00139398	USP46, USP24, USP47, USP14, USP37, USP15, USP7, USP38, USP53, USP9X, USP33, USP12, YOD1, USP1	1050	77	15999	2.77039	0.727115	0.150695	0.149561
KEGG_PATHWAY	ccad04211:Longevity regulating pathway	14	1.06464	0.00143453	PRKAB2, INSR, SIRT1, FOXO1, NRAS, CREB1, RPS6KB1, SESN3, CAMK4, CREB3L2, AKT3, KRAS, EIF4E, APPL1	585	90	10427	2.77261	0.366507	0.0651685	0.0641438
GOTERM_BP_DIRECT	GO:0007094~mitotic spindle assembly checkpoint signaling	6	0.456274	0.00145834	ZWILCH, BUB1B, KNTC1, TTK, SPDL1, MAD2L1	1050	14	15999	6.5302	0.743007	0.150695	0.149561
GOTERM_CC_DIRECT	GO:0005643~nuclear pore	9	0.684411	0.0015126	NUP155, XPOT, NUP50, TPR, XPO7, NUP88, NUP153, NUP58, NUP160	942	37	15361	3.96652	0.428839	0.0932768	0.0917642
GOTERM_MF_DIRECT	GO:0003688~DNA replication origin binding	5	0.380228	0.0016071	ORC5, POLA1, ORC4, ORC2, MCM10	1051	9	16442	8.69119	0.59502	0.0694762	0.0679927
GOTERM_BP_DIRECT	GO:0006606~protein import into nucleus	12	0.912548	0.00184631	IPO8, IPO11, NUP155, NUP133, NUP50, CSE1L, TPR, NUP88, NUP153, TNPO1, RANBP6, IPO7	1050	61	15999	2.99747	0.821024	0.171707	0.170414
GOTERM_MF_DIRECT	GO:0000981~DNA-binding transcription factor activity, RNA polymerase II-specific	78	5.93156	0.0018853	ZNF451, ZNF132, CTCF, CARF, ETS1, BACH2, LOC122432813, ELK4, ZNF280D, LOC122420632, ZNF606, POGZ, MYB, ZNF41, ZNF280C, CREB3L2, LOC122421201, LOC122424239, ZNF644, ZNF567, MYBL1, LOC122421207, ZBTB39, ATMIN, TCF12, RFX3, ZBTB33, ZHX1, RUNX2, LOC122425718, CREB1, IRF4, RFX7, LOC122420584, ZNF711, CLOCK, ZSCAN29, ZNF397, HLF, SATB1, TSHZ1, LEF1, MYNN, ZBTB43, ZNF518A, ZNF24, FOXO1, ZBTB2, PURB, LOC…	1051	866	16442	1.40906	0.653731	0.0756814	0.0740655
GOTERM_MF_DIRECT	GO:0017056~structural constituent of nuclear pore	7	0.532319	0.00205599	NUP155, NUP133, TPR, NUP88, NUP153, NUP58, NUP160	1051	22	16442	4.97768	0.685463	0.077031	0.0753862
GOTERM_BP_DIRECT	GO:0000723~telomere maintenance	6	0.456274	0.00207031	WRN, MRE11, RIF1, NBN, TERF1, ATR	1050	15	15999	6.09486	0.854773	0.175035	0.173718
GOTERM_MF_DIRECT	GO:0003724~RNA helicase activity	10	0.760456	0.00257244	EIF4A2, DDX5, DDX46, DDX20, DDX42, DHX15, DDX10, DDX21, MTREX, DHX29	1051	47	16442	3.32854	0.764859	0.0903568	0.0884275
GOTERM_BP_DIRECT	GO:0007095~mitotic G2 DNA damage checkpoint signaling	5	0.380228	0.00280262	MRE11, CDK1, NBN, TOPBP1, DTL	1050	10	15999	7.61857	0.926678	0.217203	0.215568
GOTERM_MF_DIRECT	GO:0003729~mRNA binding	22	1.673	0.00320638	FYTTD1, KHDRBS1, AQR, MYEF2, YTHDF3, NCBP1, CSTF3, SRBD1, SRSF1, SAMD4A, LOC122438706, CDC40, PTBP2, BCLAF1, METTL14, PCF11, ZNF638, G3BP1, G3BP2, NCBP3, SF3B1, EIF3A	1051	172	16442	2.001	0.835506	0.105999	0.103736
GOTERM_CC_DIRECT	GO:0000922~spindle pole	8	0.608365	0.00332132	LATS1, ASPM, NEDD1, CENPF, TUBGCP5, TUBGCP3, SPDL1, CKAP5	942	33	15361	3.95316	0.70798	0.175555	0.172709
GOTERM_CC_DIRECT	GO:0035098~ESC/E(Z) complex	4	0.304183	0.00398425	SUZ12, RBBP4, AEBP2, EED	942	6	15361	10.8712	0.771705	0.184271	0.181283
GOTERM_MF_DIRECT	GO:0004596~peptide alpha-N-acetyltransferase activity	4	0.304183	0.00448763	NAA30, NAA25, NAA16, NAA15	1051	6	16442	10.4294	0.920159	0.134489	0.131617
GOTERM_MF_DIRECT	GO:0140662~ATP-dependent protein folding chaperone	9	0.684411	0.00454679	CCT6A, CCT2, HSPA5, HSPA4, CCT8, HSPA13, CLPX, HSPD1, HSP90B1	1051	42	16442	3.35232	0.922782	0.134489	0.131617
KEGG_PATHWAY	ccad04115:p53 signaling pathway	13	0.988593	0.00465124	RRM2, APAF1, GORAB, LOC122427080, THBS1, CCND2, SESN3, ZMAT3, CHEK2, CDK1, BCL2, ATM, ATR	585	91	10427	2.54628	0.772941	0.160456	0.157934
GOTERM_BP_DIRECT	GO:0051298~centrosome duplication	4	0.304183	0.00483757	STIL, CCP110, CEP192, CKAP5	1050	6	15999	10.1581	0.989053	0.346072	0.343467
GOTERM_CC_DIRECT	GO:0005694~chromosome	7	0.532319	0.00506758	SETD2, WRN, RECQL, ZNF711, SMC3, SMC4, SMC2	942	27	15361	4.22769	0.847375	0.208334	0.204956
KEGG_PATHWAY	ccad04141:Protein processing in endoplasmic reticulum	22	1.673	0.00508842	EDEM3, SEC24B, SEC24A, HSPA5, AMFR, SEL1L, EIF2AK3, YOD1, MAGT1, HSP90B1, DNAJC3, LMAN1, CANX, DNAJC10, UBQLN1, BCL2, MAN1A1, STT3B, SEC24D, MARCHF6, UBQLN2, SEC63	585	204	10427	1.92219	0.802546	0.160456	0.157934
KEGG_PATHWAY	ccad04114:Oocyte meiosis	17	1.29278	0.00545018	CAMK2D, ITPR1, ITPR2, SMC3, PPP1CB, PPP1CC, RPS6KA3, CDC23, YWHAQ, PPP2R1B, PPP2R5E, CDC27, CDK1, ANAPC4, FBXO5, ANAPC1, MAD2L1	585	141	10427	2.14898	0.82411	0.160456	0.157934
KEGG_PATHWAY	ccad03083:Polycomb repressive complex	13	0.988593	0.00555038	SUZ12, PCGF6, USP7, USP16, EED, SFMBT2, MGA, BMI1, RBBP4, AEBP2, MTF2, ASXL2, BCOR	585	93	10427	2.49152	0.829656	0.160456	0.157934
GOTERM_BP_DIRECT	GO:0000245~spliceosomal complex assembly	5	0.380228	0.00594354	SCAF11, GEMIN6, SF3B1, CRNKL1, SRPK1	1050	12	15999	6.34881	0.996112	0.394821	0.391849
GOTERM_CC_DIRECT	GO:0000775~chromosome, centromeric region	5	0.380228	0.00640471	SGO2, CENPF, MIS18A, DSCC1, MIS12	942	13	15361	6.27184	0.907205	0.236974	0.233131
KEGG_PATHWAY	ccad04625:C-type lectin receptor signaling pathway	14	1.06464	0.0066486	EGR3, ARHGEF12, ITPR1, NFATC2, ITPR2, LOC122427080, PTPN11, CBLB, PTGS2, MALT1, NRAS, CLEC7A, AKT3, KRAS	585	107	10427	2.3321	0.880126	0.1677	0.165063
KEGG_PATHWAY	ccad05206:MicroRNAs in cancer	19	1.44487	0.00685566	PRKCE, LOC122427080, KIF23, BRCA1, BMI1, PTGS2, THBS1, SIRT1, SLC7A1, GLS, NRAS, CCND2, APC, BCL2, PDCD4, KRAS, ATM, PLCG1, MET	585	170	10427	1.99209	0.887815	0.1677	0.165063
KEGG_PATHWAY	ccad03022:Basal transcription factors	9	0.684411	0.00782764	TAF13, TAF7, TAF4B, GTF2H1, TAF5, GTF2H3, GTF2E1, TAF2, GTF2I	585	52	10427	3.08491	0.917831	0.177799	0.175004
GOTERM_BP_DIRECT	GO:0007076~mitotic chromosome condensation	4	0.304183	0.00805482	NUSAP1, PHF13, NCAPG, SMC4	1050	7	15999	8.70694	0.999463	0.445569	0.442215
GOTERM_BP_DIRECT	GO:0007059~chromosome segregation	6	0.456274	0.00812866	MIS18A, TLK1, TTK, SKA3, DLGAP5, SPC25	1050	20	15999	4.57114	0.999499	0.445569	0.442215
GOTERM_BP_DIRECT	GO:0006270~DNA replication initiation	5	0.380228	0.00814481	ORC5, ORC4, MCM10, MCM6, TOPBP1	1050	13	15999	5.86044	0.999506	0.445569	0.442215
GOTERM_CC_DIRECT	GO:0005654~nucleoplasm	19	1.44487	0.00919817	STYX, LIN9, PPP4R3B, ARID1B, IBTK, WRN, HNRNPH1, NKRF, MIER3, ZNF318, RBM12B, TASOR, CHAMP1, TASOR2, KPNA4, KPNA5, KPNA3, SUGP2, MAD2L1	942	160	15361	1.93643	0.967257	0.307054	0.302075
KEGG_PATHWAY	ccad00280:Valine, leucine and isoleucine degradation	9	0.684411	0.00981649	ALDH6A1, HMGCS1, OXCT1, EHHADH, ACADM, MMUT, BCAT1, DLD, ALDH7A1	585	54	10427	2.97066	0.95659	0.201229	0.198066
GOTERM_CC_DIRECT	GO:0032783~super elongation complex	4	0.304183	0.0101682	EAF2, AFF3, AFF4, LOC122441418	942	8	15361	8.1534	0.977211	0.307054	0.302075
GOTERM_BP_DIRECT	GO:0000278~mitotic cell cycle	11	0.836502	0.0103832	ASPM, NEDD1, WDHD1, WEE1, CENPF, MIS12, CLTC, TUBGCP5, TUBE1, TUBGCP3, SKA3	1050	66	15999	2.53952	0.99994	0.536467	0.532429
KEGG_PATHWAY	ccad04931:Insulin resistance	14	1.06464	0.0103956	PRKAB2, INSR, PRKCE, GFPT1, PTPN11, FOXO1, PPP1CB, PPP1CC, RPS6KA3, CREB1, RPS6KB1, CREB3L2, AKT3, LOC122438252	585	113	10427	2.20827	0.963959	0.201229	0.198066
KEGG_PATHWAY	ccad04660:T cell receptor signaling pathway	15	1.14068	0.0107576	ITK, NFATC2, PTPN11, CBLB, RASGRP1, MALT1, NRAS, DLG1, PPP2R1B, PPP2R5E, AKT3, CD28, KRAS, PLCG1, MAP3K7	585	126	10427	2.1219	0.967917	0.201229	0.198066
GOTERM_CC_DIRECT	GO:0030870~Mre11 complex	3	0.228137	0.0107884	RAD50, MRE11, NBN	942	3	15361	16.3068	0.981928	0.307054	0.302075
GOTERM_MF_DIRECT	GO:0003677~DNA binding	40	3.04183	0.0110499	TOP2B, KMT2A, LOC122451652, TSHZ1, LOC122425488, LIN9, JRKL, BRCA1, SPTY2D1, BCLAF1, BTAF1, POLR2B, SMARCAD1, LOC122440602, BEND7, ZBED5, TMPO, POLQ, TIGD2, SHPRH, ATAD5, RFC1, SMARCA5, DNTT, ASH1L, ARID1B, ZHX1, WDR76, GCFC2, SETBP1, SUB1, POLE2, POLR1B, MTF2, ASXL2, CRY1, TAF4B, ZMYND11, PAXBP1, LCORL	1051	418	16442	1.49705	0.998059	0.310502	0.303872
GOTERM_MF_DIRECT	GO:0000287~magnesium ion binding	13	0.988593	0.0117938	PRPS2, ATP8B2, ATP8A1, MAST4, ATP10D, ATP11B, RPS6KA3, WEE1, SRR, PPM1B, MAP3K7, AASDHPPT, IDH3A	1051	90	16442	2.25971	0.998728	0.315625	0.308885
KEGG_PATHWAY	ccad04922:Glucagon signaling pathway	14	1.06464	0.0119558	CAMK2D, PRKAB2, ITPR1, ITPR2, PHKA1, PHKB, PPP4R3B, SIRT1, FOXO1, CREB1, CREB3L2, AKT3, LOC122435300, SIK2	585	115	10427	2.16987	0.978178	0.205929	0.202692
KEGG_PATHWAY	ccad05215:Prostate cancer	13	0.988593	0.012304	RB1, LEF1, LOC122427080, FOXO1, HSP90B1, NRAS, CREB1, PDGFD, CREB3L2, AKT3, BCL2, CTNNB1, KRAS	585	103	10427	2.24962	0.980492	0.205929	0.202692
GOTERM_MF_DIRECT	GO:0000175~3'-5'-RNA exonuclease activity	5	0.380228	0.0127951	DIS3, ERI1, ERI2, ANGEL2, DIS3L	1051	15	16442	5.21472	0.999281	0.326856	0.319877
GOTERM_BP_DIRECT	GO:0006260~DNA replication	8	0.608365	0.0141893	ORC5, POLA1, ORC4, RRM1, WRN, RFC1, ORC2, MCM10	1050	40	15999	3.04743	0.999998	0.6598	0.654834
GOTERM_BP_DIRECT	GO:0002682~regulation of immune system process	8	0.608365	0.0141893	LOC122440621, ZBTB38, LOC122440466, ZBTB1, ZNF789, LOC122424239, ZBTB11, ZNF26	1050	40	15999	3.04743	0.999998	0.6598	0.654834
GOTERM_MF_DIRECT	GO:0061630~ubiquitin protein ligase activity	20	1.52091	0.014657	SHPRH, ANKIB1, UHRF2, FANCL, AMFR, LTN1, WWP1, LOC122427080, UBE3A, CBLB, HERC4, ITCH, HERC2, RMND5A, HECTD1, RFWD3, RNF19A, TRIM37, RAD18, DZIP3	1051	173	16442	1.80857	0.999751	0.35814	0.350493
GOTERM_CC_DIRECT	GO:0005794~Golgi apparatus	24	1.8251	0.0155318	SLC30A7, GALNT7, TMEM87B, ZDHHC20, MMGT1, GOLM1, SLC30A5, GALNT1, ZDHHC23, LOC122427080, LYSMD3, SELENOI, RAB33B, RAB10, GOLGA4, PREPL, ARV1, GNPTAB, HEATR5A, PDCD10, TRIP11, GNPNAT1, CEPT1, TMED5	942	232	15361	1.68691	0.996948	0.410483	0.403827
GOTERM_MF_DIRECT	GO:0061608~nuclear import signal receptor activity	5	0.380228	0.0162138	KPNA4, KPNA5, TNPO1, RANBP6, KPNA3	1051	16	16442	4.8888	0.999898	0.364485	0.356703
GOTERM_MF_DIRECT	GO:0043015~gamma-tubulin binding	5	0.380228	0.0162138	CEP57, NEDD1, CEP70, TUBGCP5, TUBGCP3	1051	16	16442	4.8888	0.999898	0.364485	0.356703
KEGG_PATHWAY	ccad04068:FoxO signaling pathway	15	1.14068	0.0167442	PLK4, PRKAB2, USP7, HOMER1, INSR, LOC122427080, SIRT1, FOXO1, RBL2, CCNB3, NRAS, CCND2, AKT3, KRAS, ATM	585	133	10427	2.01022	0.995345	0.266232	0.262046
GOTERM_CC_DIRECT	GO:0030992~intraciliary transport particle B	5	0.380228	0.0175345	IFT74, LOC122453723, TRIM59, IFT80, CLUAP1	942	17	15361	4.79612	0.998563	0.432519	0.425505
KEGG_PATHWAY	ccad04710:Circadian rhythm	7	0.532319	0.0179668	PRKAB2, CREB1, BHLHE40, CRY1, RORA, NR1D2, CLOCK	585	38	10427	3.28336	0.996866	0.272068	0.26779
GOTERM_MF_DIRECT	GO:0004197~cysteine-type endopeptidase activity	9	0.684411	0.0204689	USP46, USP24, USP47, USP7, USP38, USP9X, USP12, USP1, MALT1	1051	54	16442	2.60736	0.999991	0.442442	0.432995
KEGG_PATHWAY	ccad04152:AMPK signaling pathway	14	1.06464	0.0213183	PRKAB2, CAB39, INSR, SIRT1, FOXO1, RAB10, CREB1, RPS6KB1, PPP2R1B, PPP2R5E, CREB3L2, AKT3, MAP3K7, LOC122438252	585	124	10427	2.01238	0.998943	0.308147	0.303302
GOTERM_BP_DIRECT	GO:0030490~maturation of SSU-rRNA	5	0.380228	0.0219932	RIOK3, SRFBP1, RIOK2, NOL11, RIOK1	1050	17	15999	4.48151	1	0.921285	0.914351
GOTERM_BP_DIRECT	GO:0000281~mitotic cytokinesis	5	0.380228	0.0219932	ROCK2, NUSAP1, ECT2, CEP55, CIT	1050	17	15999	4.48151	1	0.921285	0.914351
GOTERM_MF_DIRECT	GO:0030983~mismatched DNA binding	4	0.304183	0.0222054	MSH6, MSH2, MSH3, PMS1	1051	10	16442	6.25766	0.999997	0.451858	0.44221
GOTERM_MF_DIRECT	GO:0000976~transcription cis-regulatory region binding	6	0.456274	0.0225125	GABPB2, ATMIN, TFAM, AHR, GABPB1, TAF2	1051	26	16442	3.61019	0.999997	0.451858	0.44221
GOTERM_BP_DIRECT	GO:0006189~'de novo' IMP biosynthetic process	3	0.228137	0.0235771	ATIC, PFAS, GART	1050	4	15999	11.4279	1	0.921285	0.914351
GOTERM_CC_DIRECT	GO:0005635~nuclear envelope	7	0.532319	0.023697	IPO8, SUN1, IPO11, CSE1L, NEMP1, IPO7, MTMR6	942	37	15361	3.08507	0.99986	0.547992	0.539106
GOTERM_BP_DIRECT	GO:0006893~Golgi to plasma membrane transport	4	0.304183	0.0238131	RABEP1, EXOC8, EXOC6, EXOC5	1050	10	15999	6.09486	1	0.921285	0.914351
KEGG_PATHWAY	ccad04070:Phosphatidylinositol signaling system	12	0.912548	0.0238413	PI4K2B, INPP4B, PIKFYVE, DGKE, INPP5F, PPIP5K2, SACM1L, ITPR1, ITPR2, PIK3C3, PLCG1, MTMR6	585	100	10427	2.13887	0.999535	0.315898	0.310931
KEGG_PATHWAY	ccad05210:Colorectal cancer	12	0.912548	0.0238413	MSH6, NRAS, APC, RPS6KB1, MSH2, MSH3, AKT3, LEF1, BCL2, CTNNB1, KRAS, APPL1	585	100	10427	2.13887	0.999535	0.315898	0.310931
GOTERM_BP_DIRECT	GO:0007265~Ras protein signal transduction	7	0.532319	0.0247657	USP8, RIT1, NRAS, KRAS, RAPGEF6, RASGRP1, RALGPS2	1050	35	15999	3.04743	1	0.921285	0.914351
GOTERM_BP_DIRECT	GO:0001817~regulation of cytokine production	8	0.608365	0.0260533	LOC122440621, ZBTB38, LOC122440466, ZBTB1, ZNF789, LOC122424239, ZBTB11, ZNF26	1050	45	15999	2.70883	1	0.924677	0.917717
GOTERM_BP_DIRECT	GO:0006898~receptor-mediated endocytosis	5	0.380228	0.0268455	CLTC, AP4E1, LDLRAD3, DNAJC13, LOC122438252	1050	18	15999	4.23254	1	0.924677	0.917717
KEGG_PATHWAY	ccad03460:Fanconi anemia pathway	8	0.608365	0.0274143	FANCM, RMI1, ERCC4, FANCL, USP1, POLI, BRCA1, ATR	585	53	10427	2.6904	0.999855	0.34871	0.343227
KEGG_PATHWAY	ccad05165:Human papillomavirus infection	30	2.28137	0.0296413	ITGB1, ATP6V1A, RB1, PATJ, LOC122427080, UBE3A, PTGS2, THBS1, FOXO1, NRAS, PARD6B, CCND2, PPP2R1B, PPP2R5E, CREB3L2, AKT3, ITGA4, ITGA1, RBL2, DLG1, CREB1, RPS6KB1, APC, CTNNB1, KRAS, ATM, ITGA6, TLR3, PALS1, ATR	585	359	10427	1.48947	0.99993	0.351796	0.346264
KEGG_PATHWAY	ccad05166:Human T-cell leukemia virus 1 infection	23	1.74905	0.0298694	RB1, MAP3K1, NFYB, NFATC2, BUB1B, ETS1, ELK4, NRAS, DLG1, CCND2, CDC23, CREB1, CHEK2, CANX, CREB3L2, AKT3, CDC27, ANAPC4, KRAS, ATM, ANAPC1, MAD2L1, ATR	585	256	10427	1.60137	0.999935	0.351796	0.346264
GOTERM_BP_DIRECT	GO:0006888~endoplasmic reticulum to Golgi vesicle-mediated transport	12	0.912548	0.0307264	LMAN1, SCFD1, SEC24B, PGAP1, SEC24A, GOLT1B, COPB1, USO1, TRIP11, TRAPPC8, SEC24D, TMED5	1050	89	15999	2.05445	1	0.995591	0.988098
GOTERM_CC_DIRECT	GO:0005876~spindle microtubule	5	0.380228	0.030868	RMDN2, KIF11, SKA3, KIF20B, CLASP2	942	20	15361	4.0767	0.999991	0.59776	0.588066
GOTERM_BP_DIRECT	GO:0000122~negative regulation of transcription by RNA polymerase II	29	2.20532	0.0310453	ZNF175, LOC122421285, ZBTB1, ZFP82, BMI1, ZNF26, ZFP14, ZKSCAN7, LOC122440621, MIER3, LOC122440466, ZNF569, ZNF789, ZNF568, LOC122424239, LOC122424879, ZNF445, ZFP1, MAGEE2, EED, ZBTB38, ZNF182, NR1D2, ZBTB11, LOC122441347, LOC122420721, LOC122420762, LOC122432320, BCOR	1050	295	15999	1.49789	1	0.995591	0.988098
GOTERM_CC_DIRECT	GO:0031463~Cul3-RING ubiquitin ligase complex	4	0.304183	0.0332492	KLHL9, KLHL15, CUL3, KLHL7	942	12	15361	5.4356	0.999996	0.59776	0.588066
GOTERM_CC_DIRECT	GO:0030688~preribosome, small subunit precursor	4	0.304183	0.0332492	RIOK3, TSR1, RIOK2, RIOK1	942	12	15361	5.4356	0.999996	0.59776	0.588066
GOTERM_CC_DIRECT	GO:0000151~ubiquitin ligase complex	6	0.456274	0.0339269	ANKIB1, AMFR, RNF19A, DCUN1D4, DCUN1D1, ASB1	942	30	15361	3.26136	0.999997	0.59776	0.588066
GOTERM_CC_DIRECT	GO:0055037~recycling endosome	6	0.456274	0.0339269	RAB10, SLC9A6, SLC9A7, ATP11B, RELCH, DENND6A	942	30	15361	3.26136	0.999997	0.59776	0.588066
GOTERM_BP_DIRECT	GO:0046599~regulation of centriole replication	3	0.228137	0.0376001	CEP295, ALMS1, SPICE1	1050	5	15999	9.14229	1	1	0.993541
GOTERM_BP_DIRECT	GO:0008104~protein localization	5	0.380228	0.038327	AKAP11, EXOC8, HEATR5A, LRBA, BBS7	1050	20	15999	3.80929	1	1	0.993541
GOTERM_MF_DIRECT	GO:0005085~guanyl-nucleotide exchange factor activity	18	1.36882	0.0383738	DENND1B, ARFGEF2, ARHGEF12, DENND5B, DOCK9, RASGRP1, DOCK10, DOCK11, RIC8B, ALS2, SPATA13, ARHGEF3, RAPGEF2, RCC1, DENND6A, ECT2, RAPGEF6, RALGPS2	1051	167	16442	1.6862	1	0.743658	0.727779
KEGG_PATHWAY	ccad04550:Signaling pathways regulating pluripotency of stem cells	15	1.14068	0.0396141	PCGF6, RIF1, LOC122428082, BMI1, LOC122428174, ACVR2A, NRAS, ACVR1C, APC, AKT3, CTNNB1, SMARCAD1, KRAS, IL6ST, SKIL	585	149	10427	1.79436	0.999997	0.438932	0.43203
KEGG_PATHWAY	ccad04140:Autophagy - animal	18	1.36882	0.0410362	EIF2AK3, PIK3R4, ITPR1, EIF2AK4, RAB33B, NRAS, RPS6KB1, RRAGB, VPS41, AKT3, BCL2, TAX1BP1, BIRC6, KRAS, PIK3C3, SUPT20H, MAP3K7, ATG2B	585	192	10427	1.67099	0.999998	0.438932	0.43203
KEGG_PATHWAY	ccad05203:Viral carcinogenesis	20	1.52091	0.0414086	RB1, USP7, EGR3, LOC122427080, UBE3A, GTF2H1, GTF2H3, GTF2E1, RBL2, NRAS, DLG1, CCND2, CREB1, YWHAQ, CREB3L2, TRAF5, CDK1, KRAS, LOC122440602, IL6ST	585	221	10427	1.61303	0.999999	0.438932	0.43203
GOTERM_BP_DIRECT	GO:0006468~protein phosphorylation	38	2.88973	0.0418253	CAMK2D, STK39, PIK3R4, BUB1B, RPS6KA3, ACVR1C, RPS6KC1, CHEK2, AKT3, PBK, NEK1, TRPM7, RIOK2, MAP4K5, MAPK6, MAP3K7, PLK4, PRKCH, MAP3K1, RIOK3, EIF2AK3, CDC7, ACVR2A, SRPK1, TBCK, CDK8, WEE1, RPS6KB1, PRKD3, PDIK1L, STK26, TAOK1, CAMK4, CDK1, SIK2, TNIK, MET, ATR	1050	421	15999	1.37532	1	1	0.993541
GOTERM_MF_DIRECT	GO:0043138~3'-5' DNA helicase activity	4	0.304183	0.0458843	WRN, FANCM, DHX9, RECQL	1051	13	16442	4.81358	1	0.859565	0.841212
KEGG_PATHWAY	ccad00562:Inositol phosphate metabolism	9	0.684411	0.0473265	PI4K2B, INPP4B, PIKFYVE, ALDH6A1, INPP5F, SACM1L, PIK3C3, PLCG1, MTMR6	585	72	10427	2.22799	1	0.485479	0.477845
GOTERM_CC_DIRECT	GO:0033588~elongator holoenzyme complex	3	0.228137	0.0476757	ELP1, ELP2, ELP4	942	6	15361	8.1534	1	0.801818	0.788816
GOTERM_BP_DIRECT	GO:0016567~protein ubiquitination	14	1.06464	0.0480193	UHRF2, CUL5, KLHL15, CUL3, CUL2, RNF168, KLHL9, HERC4, HERC2, CAND1, RFWD3, KLHL7, NAE1, ASB1	1050	119	15999	1.79261	1	1	0.993541
GOTERM_MF_DIRECT	GO:0003712~transcription coregulator activity	11	0.836502	0.0502225	TCERG1, BCLAF1, AKIRIN1, LOC122435217, NAB1, JMJD1C, LOC122435265, SUPT20H, LOC122453076, LOC122449683, LOC122452816	1051	87	16442	1.978	1	0.903563	0.88427
GOTERM_MF_DIRECT	GO:0009378~four-way junction helicase activity	3	0.228137	0.0514484	WRN, FANCM, RECQL	1051	6	16442	7.82207	1	0.903563	0.88427
GOTERM_CC_DIRECT	GO:0000139~Golgi membrane	12	0.912548	0.0533784	LMAN1, SCFD1, C28H6ORF89, SLC35B4, SLC35A3, MAN2A1, FUT11, USO1, MAN1A1, LDLRAD4, CASD1, SLC35A5	942	104	15361	1.88155	1	0.817472	0.804216
KEGG_PATHWAY	ccad05205:Proteoglycans in cancer	20	1.52091	0.0536988	ITGB1, CAMK2D, DDX5, ARHGEF12, ROCK2, ITPR1, ITPR2, LOC122427080, PTPN11, THBS1, PPP1CB, PPP1CC, NRAS, RPS6KB1, AKT3, PDCD4, CTNNB1, KRAS, PLCG1, MET	585	228	10427	1.5635	1	0.518531	0.510378
KEGG_PATHWAY	ccad01524:Platinum drug resistance	10	0.760456	0.0539413	MSH6, TOP2B, APAF1, MSH2, MSH3, AKT3, BCL2, LOC122427080, ATM, BRCA1	585	87	10427	2.04873	1	0.518531	0.510378
GOTERM_CC_DIRECT	GO:0000776~kinetochore	6	0.456274	0.0542974	DYNLT3, TTK, CKAP5, NSL1, MAD2L1, CENPC	942	34	15361	2.87767	1	0.817472	0.804216
GOTERM_CC_DIRECT	GO:0005802~trans-Golgi network	9	0.684411	0.0552346	C1H17ORF75, PI4K2B, RAB30, SCOC, CNST, CCDC186, DOP1A, ATP11B, RELCH	942	68	15361	2.15825	1	0.817472	0.804216
GOTERM_BP_DIRECT	GO:0006355~regulation of DNA-templated transcription	31	2.35741	0.0558211	LIN54, SETD2, LOC122421383, CDCA7L, ZNF23, SPTY2D1, CCAR1, ZNF280D, SBNO1, LOC122439762, LOC122445535, HSF2, ZNF280C, POGZ, MYB, LOC122433002, LOC122420719, LOC122420718, MTERF1, LOC122421105, MYBL1, ZNF420, SFMBT2, GTF2H3, HCFC2, PSPC1, MORF4L2, MTF2, LOC122420166, ZNF354A, ZNF157	1050	338	15999	1.39749	1	1	0.993541
KEGG_PATHWAY	ccad04148:Efferocytosis	16	1.21673	0.0562885	CX3CR1, CAMK2D, ATP8A1, PTGER2, NFATC2, ADAM10, PTPN11, ATP11B, PTGS2, DUSP16, THBS1, SIRT1, ADAM17, CREB1, VPS41, LOC122438252	585	171	10427	1.66774	1	0.518531	0.510378
GOTERM_BP_DIRECT	GO:0006351~DNA-templated transcription	8	0.608365	0.0566115	PHF3, DIDO1, POLR2B, POLR1B, TAF4B, LIN9, CBFA2T2, SCAI	1050	53	15999	2.29995	1	1	0.993541
KEGG_PATHWAY	ccad03015:mRNA surveillance pathway	12	0.912548	0.057071	PPP1CB, PPP1CC, HBS1L, SMG1, NCBP1, PPP2R1B, PCF11, PPP2R5E, CSTF3, CPSF2, PAPOLA, ETF1	585	115	10427	1.85989	1	0.518531	0.510378
GOTERM_BP_DIRECT	GO:0045727~positive regulation of translation	4	0.304183	0.059439	LARP1, GUF1, LARP4B, LARP4	1050	14	15999	4.35347	1	1	0.993541
GOTERM_BP_DIRECT	GO:0060271~cilium assembly	13	0.988593	0.0596899	WDR19, SCLT1, CPLANE1, IFT80, SEPTIN7, IFT74, ABLIM1, PCM1, CENPJ, LOC122438655, CEP70, TRIM59, CLUAP1	1050	111	15999	1.78453	1	1	0.993541
GOTERM_CC_DIRECT	GO:0019898~extrinsic component of membrane	4	0.304183	0.0600265	BLOC1S6, VPS13C, VPS13A, ATG2B	942	15	15361	4.34848	1	0.817617	0.804359
GOTERM_CC_DIRECT	GO:0005730~nucleolus	16	1.21673	0.0606733	UTP15, DHX9, MAK16, DNTTIP2, WDR75, SPTY2D1, RRP8, WDR43, C28H6ORF89, ERI1, KATNBL1, NKRF, NUSAP1, UTP20, NOL11, DCAF13	942	158	15361	1.65132	1	0.817617	0.804359
GOTERM_MF_DIRECT	GO:0042393~histone binding	11	0.836502	0.0606986	SBNO1, TSPYL1, SET, RBBP4, YEATS2, SFMBT2, ATAD2, HAT1, SMARCA5, PWWP2A, SPTY2D1	1051	90	16442	1.91206	1	1	0.980392
KEGG_PATHWAY	ccad04720:Long-term potentiation	9	0.684411	0.0615931	PPP1CB, PPP1CC, RPS6KA3, CAMK2D, NRAS, CAMK4, ITPR1, ITPR2, KRAS	585	76	10427	2.11073	1	0.544072	0.535518
GOTERM_BP_DIRECT	GO:0051726~regulation of cell cycle	6	0.456274	0.0618618	USP16, PCLAF, LOC122439416, TXLNG, LOC122427080, LIN9	1050	33	15999	2.77039	1	1	0.993541
GOTERM_CC_DIRECT	GO:0005669~transcription factor TFIID complex	5	0.380228	0.0634208	TAF13, TAF7, TAF4B, TAF5, TAF2	942	25	15361	3.26136	1	0.817617	0.804359
GOTERM_CC_DIRECT	GO:0005664~nuclear origin of replication recognition complex	3	0.228137	0.0640835	ORC5, ORC4, ORC2	942	7	15361	6.98863	1	0.817617	0.804359
KEGG_PATHWAY	ccad03030:DNA replication	6	0.456274	0.0648349	POLA1, RFC1, POLE2, PRIM1, DNA2, MCM6	585	39	10427	2.74214	1	0.55723	0.548468
GOTERM_BP_DIRECT	GO:0006406~mRNA export from nucleus	5	0.380228	0.0684664	FYTTD1, LOC122444987, NCBP1, TPR, NUP88	1050	24	15999	3.1744	1	1	0.993541
GOTERM_CC_DIRECT	GO:0005819~spindle	4	0.304183	0.0706301	CLTC, CHAMP1, SPICE1, TTK	942	16	15361	4.0767	1	0.871105	0.856979
GOTERM_BP_DIRECT	GO:0006298~mismatch repair	4	0.304183	0.0707985	MSH6, MSH2, MSH3, PMS1	1050	15	15999	4.06324	1	1	0.993541
KEGG_PATHWAY	ccad05200:Pathways in cancer	41	3.11787	0.0720517	ITGB1, RB1, CAMK2D, ROCK2, PTGER2, LEF1, CUL2, LOC122449754, LOC122427080, PTGS2, ETS1, RASGRP1, FOXO1, LRP6, HSP90B1, GNA13, NRAS, CCND2, AKT3, TPR, STAT4, PLCG1, APPL1, ARHGEF12, APAF1, NCOA3, NCOA4, EML4, MSH6, RPS6KB1, APC, MSH2, MSH3, LPAR6, TRAF5, BCL2, CTNNB1, KRAS, ITGA6, IL6ST, MET	585	564	10427	1.29571	1	0.602959	0.593478
GOTERM_BP_DIRECT	GO:0006513~protein monoubiquitination	3	0.228137	0.072352	FANCL, RAD18, OBI1	1050	7	15999	6.5302	1	1	0.993541
GOTERM_BP_DIRECT	GO:0016926~protein desumoylation	3	0.228137	0.072352	SENP6, SENP7, SENP5	1050	7	15999	6.5302	1	1	0.993541
KEGG_PATHWAY	ccad04213:Longevity regulating pathway - multiple species	8	0.608365	0.0750161	NRAS, PRKAB2, RPS6KB1, INSR, AKT3, KRAS, SIRT1, FOXO1	585	66	10427	2.16048	1	0.61167	0.602052
GOTERM_MF_DIRECT	GO:0140326~ATPase-coupled intramembrane lipid transporter activity	4	0.304183	0.0780218	ATP8B2, ATP8A1, ATP10D, ATP11B	1051	16	16442	3.91104	1	1	0.980392
KEGG_PATHWAY	ccad04914:Progesterone-mediated oocyte maturation	10	0.760456	0.0798543	CCNB3, RPS6KA3, CDC23, AKT3, CDC27, CDK1, ANAPC4, KRAS, ANAPC1, MAD2L1	585	94	10427	1.89616	1	0.619358	0.60962
KEGG_PATHWAY	ccad05235:PD-L1 expression and PD-1 checkpoint pathway in cancer	10	0.760456	0.0798543	EML4, NRAS, RPS6KB1, AKT3, CD28, NFATC2, PTPN11, KRAS, PLCG1, RASGRP1	585	94	10427	1.89616	1	0.619358	0.60962
GOTERM_CC_DIRECT	GO:0035861~site of double-strand break	5	0.380228	0.0800179	RNF168, ZGRF1, RFWD3, SHLD2, RBBP8	942	27	15361	3.01978	1	0.948764	0.933379
GOTERM_BP_DIRECT	GO:0010468~regulation of gene expression	9	0.684411	0.0811103	USP16, RBBP4, ZNF507, LOC122428082, AFF3, AFF4, LOC122428174, LOC122441418, KDM6A	1050	69	15999	1.98745	1	1	0.993541
GOTERM_CC_DIRECT	GO:0008278~cohesin complex	3	0.228137	0.0820553	STAG1, STAG2, RAD21	942	8	15361	6.11505	1	0.948764	0.933379
GOTERM_MF_DIRECT	GO:0046872~metal ion binding	19	1.44487	0.0827795	MBNL1, RBM26, LOC122451652, DDHD2, DDHD1, IDE, RC3H2, RNF168, ARMC1, PIKFYVE, HECTD1, DHX57, RUFY2, ZNF711, MMUT, LOC122439581, GART, NUDT12, OBI1	1051	198	16442	1.50121	1	1	0.980392
GOTERM_BP_DIRECT	GO:0007099~centriole replication	4	0.304183	0.0830479	CEP152, KIAA0753, CCP110, CEP192	1050	16	15999	3.80929	1	1	0.993541
GOTERM_BP_DIRECT	GO:0007098~centrosome cycle	4	0.304183	0.0830479	PCM1, PARD6B, CEP120, HAUS5	1050	16	15999	3.80929	1	1	0.993541
KEGG_PATHWAY	ccad00250:Alanine, aspartate and glutamate metabolism	6	0.456274	0.0837572	GLUD1, ALDH5A1, PPAT, GFPT1, ADSS2, GLS	585	42	10427	2.54628	1	0.634162	0.624191
GOTERM_BP_DIRECT	GO:0042147~retrograde transport, endosome to Golgi	6	0.456274	0.0838681	TMEM87B, GOLT1B, HEATR5A, VPS50, VPS54, VPS26A	1050	36	15999	2.53952	1	1	0.993541
KEGG_PATHWAY	ccad00230:Purine metabolism	13	0.988593	0.0858625	PRPS2, RRM1, RRM2, GUCY1B1, PDE4D, GMPS, PFAS, ATIC, PPAT, LOC122429837, ADSS2, PDE7A, GART	585	138	10427	1.67907	1	0.634983	0.624999
GOTERM_CC_DIRECT	GO:0005938~cell cortex	5	0.380228	0.0890442	PARD6B, RHOT1, SPIRE1, ECT2, FRYL	942	28	15361	2.91193	1	0.998374	0.982184
GOTERM_MF_DIRECT	GO:0031624~ubiquitin conjugating enzyme binding	5	0.380228	0.0901472	ANKIB1, RNF19A, DCUN1D4, DCUN1D1, MARCHF7	1051	27	16442	2.89706	1	1	0.980392
GOTERM_MF_DIRECT	GO:0140664~ATP-dependent DNA damage sensor activity	4	0.304183	0.0904221	MSH6, MSH2, MSH3, PMS1	1051	17	16442	3.68098	1	1	0.980392
GOTERM_BP_DIRECT	GO:0002098~tRNA wobble uridine modification	3	0.228137	0.0923812	ELP2, ELP4, MTO1	1050	8	15999	5.71393	1	1	0.993541
GOTERM_BP_DIRECT	GO:0000266~mitochondrial fission	3	0.228137	0.0923812	MTFR2, DNM1L, SLC25A46	1050	8	15999	5.71393	1	1	0.993541
GOTERM_MF_DIRECT	GO:0043130~ubiquitin binding	8	0.608365	0.0927767	AMFR, UBR5, MARCHF7, SMARCAD1, TAB3, STAM, N4BP2, VPS36	1051	61	16442	2.05169	1	1	0.980392
GOTERM_CC_DIRECT	GO:0032039~integrator complex	4	0.304183	0.0941141	INTS13, INTS2, LOC122435830, INTS8	942	18	15361	3.62373	1	1	0.98645
GOTERM_BP_DIRECT	GO:0032922~circadian regulation of gene expression	4	0.304183	0.096131	PPP1CB, BHLHE40, CRY1, CLOCK	1050	17	15999	3.58521	1	1	0.993541
KEGG_PATHWAY	ccad04137:Mitophagy - animal	12	0.912548	0.0992094	TOMM70, USP8, NRAS, USP15, RHOT1, OPA1, AMFR, MFN1, EIF2AK3, TAX1BP1, KRAS, TBC1D15	585	127	10427	1.68415	1	0.714337	0.703105
