# Supplementary material for: Peripheral transcriptional responses to experimental SARS-CoV-2 inoculation in North American Elk cows and calves
Source: Research Square preprint supplement (doi:10.21203/rs.3.rs-6505643/v1), 2025-05-15
Supplement: Supplementary file 4 [file 6dc1ba1fa066ba9923cee1f2.xlsx]

## Sheet: downregulated
Supplementary Table S11 - Downregulated genes in Adults (D0xD14)
gene_id	log2fc	padj
ALAS2	-19.1127	2.03e-50
FTH1	-19.0365	1.05e-53
GNAI2	-18.786	1.26e-52
LOC122429640	-18.5584	1.23e-51
RPSA	-18.371	2.09e-52
FLNA	-18.3198	7.07e-49
LOC122434053	-18.2405	1.98e-51
MYH9	-18.2141	6.59e-49
ITM2C	-18.0531	2.76e-49
EEF1G	-17.7265	9.82e-49
AHNAK	-17.6985	1.91e-47
LOC122430936	-17.6777	9.49e-47
S100A4	-17.6211	4.41e-48
MSN	-17.5597	1.37e-46
TMSB4X	-17.55	3.28e-47
KLF13	-17.4776	2.22e-46
RPL10	-17.4317	8.53e-47
RIPOR2	-17.3927	5.05e-47
EIF4B	-17.3178	9.26e-47
CSK	-17.1228	4.89e-44
C5AR1	-17.066	6.44e-57
LOC122426789	-17.0615	2.1e-43
LOC122424708	-17.0612	8.26e-43
LOC122423442	-17.0393	1.64e-42
NLRC5	-17.0307	9.93e-44
SERPINB1	-16.9865	5.1e-44
CCND3	-16.9703	5.87e-43
UCP2	-16.9048	1.3e-51
MMP25	-16.9039	1.2e-43
LSP1	-16.8685	2.14e-41
SMAP2	-16.8417	2.37e-43
NUCB1	-16.7947	2.06e-41
PSMB8	-16.7503	6.1e-43
EZR	-16.6843	3.23e-42
RAF1	-16.6117	4.46e-43
PICALM	-16.5744	3.86e-42
RPS12	-16.5701	1.2e-42
SNN	-16.5687	1.68e-41
SF3B2	-16.5602	2.59e-40
TLR4	-16.5422	4.25e-42
SON	-16.538	9.08e-43
PRRC2A	-16.5149	1.94e-40
AKAP13	-16.4989	1.9e-42
CDA	-16.4632	4.11e-42
FERMT3	-16.3954	2.71e-40
NOP53	-16.3887	2.22e-41
MYL6	-16.3701	5.61e-41
STAT6	-16.368	2.22e-40
SEMA4A	-16.3643	5.53e-41
TNFRSF1A	-16.3541	6.62e-41
GSN	-16.3371	3.22e-39
ZFP36	-16.2932	1.61e-41
UBA1	-16.2882	4.06e-39
PACSIN2	-16.2793	3.04e-41
UBR4	-16.2683	2.91e-40
HNRNPD	-16.2559	1.65e-40
FYB1	-16.2502	3.42e-41
SEMA4D	-16.2456	1.59e-41
LOC122424467	-16.2448	1.62e-39
LOC122423438	-16.2344	3.03e-52
EMILIN2	-16.2264	6.07e-39
MAPK14	-16.2189	1.2e-40
AKT1	-16.1917	1.56e-39
LOC122429364	-16.1827	2.27e-13
LOC122429977	-16.166	6.33e-39
CCNI	-16.1609	1.9e-40
IL7R	-16.1529	2.1e-40
HSP90AA1	-16.1383	1.17e-40
LOC122420491	-16.0772	3.59e-40
N4BP1	-16.0746	2.14e-39
HNRNPL	-16.0561	2.98e-39
ADCY7	-16.0104	6.98e-40
NFKBIA	-15.9894	1.79e-38
SF3A1	-15.9749	7.89e-38
CTSD	-15.9567	3.18e-49
RANBP10	-15.9383	3.57e-35
F13A1	-15.9361	1.83e-50
NCF1	-15.9296	4.07e-38
DAZAP2	-15.9035	1.32e-39
DYNC1H1	-15.8995	1.43e-38
IFNGR1	-15.8858	1.8e-36
LOC122429976	-15.8763	3.8e-39
IL13RA1	-15.8626	2.21e-37
LOC122428226	-15.8412	1.59e-39
RPS16	-15.8046	7.87e-38
LOC122421712	-15.7985	1.74e-37
PLEKHA2	-15.7821	3e-39
DDB1	-15.7794	2.63e-37
AP1G1	-15.7647	1.2e-37
ILRUN	-15.7567	1.58e-37
MDH2	-15.7547	1.25e-37
IL4R	-15.7432	2.27e-37
DBNL	-15.7239	5.05e-37
RPL15	-15.7179	2.76e-38
NCL	-15.6889	1.65e-38
LOC122434354	-15.6823	9.91e-38
APLP2	-15.6804	1.29e-37
SLC6A6	-15.6669	4.89e-38
TMBIM1	-15.6629	2.81e-38
SH3KBP1	-15.6498	1.43e-37
LOC122426558	-15.6478	6.79e-37
ANXA5	-15.6324	3.33e-38
FBXL5	-15.6063	8.19e-38
LOC122420173	-15.5953	4.11e-38
HSP90B1	-15.5708	8.51e-38
EEF1A1	-15.5676	7.54e-147
RALBP1	-15.566	4.54e-38
SLC25A3	-15.5526	1.16e-37
MPP1	-15.5053	2.29e-36
SUPT5H	-15.4577	2.21e-35
PLEKHB2	-15.4464	1.26e-35
HNRNPA3	-15.4342	1.53e-37
ARID1A	-15.4262	1.23e-36
HECA	-15.4175	2.57e-36
SAT1	-15.4095	3.54e-35
SEC14L1	-15.4049	1.24e-36
PSMD13	-15.397	5.09e-36
SLC25A37	-15.3872	7.23e-36
TOP2B	-15.3857	9.62e-37
M6PR	-15.3733	9.14e-37
RBM5	-15.3393	5.69e-37
NSD1	-15.3099	6.85e-37
CD63	-15.3074	7.45e-36
SSR1	-15.2993	1.34e-36
MTCH1	-15.2753	5.54e-36
FOXP1	-15.2708	2.75e-36
TTLL12	-15.2541	5.51e-35
BNIP3L	-15.2504	3.6e-35
TRIM28	-15.2365	2.05e-34
CIC	-15.2244	1.9e-34
C28H6orf62	-15.2225	5.02e-35
FLI1	-15.2172	1.49e-36
MRTFA	-15.2142	3.76e-34
DCTN2	-15.1811	3.7e-35
CD27	-15.1774	1.58e-34
PBX2	-15.1737	1.44e-35
TBC1D14	-15.1645	3.85e-36
CD5	-15.1638	3.97e-35
ST6GALNAC4	-15.1341	2.62e-34
EEF1B2	-15.1297	4.5e-35
KLHL8	-15.1271	1.92e-33
UNC13D	-15.1264	6.07e-34
PML	-15.1236	4.67e-35
ANKRD12	-15.1057	5.41e-35
SLC40A1	-15.0981	2.22e-35
TRIM56	-15.0936	7.86e-36
TNRC6B	-15.0935	1.48e-35
GRK2	-15.0829	2.39e-44
DDX24	-15.0797	1.84e-34
SNW1	-15.0775	2.18e-35
S1PR1	-15.0669	3.93e-35
DOK2	-15.0638	1.1e-34
PPP2R5C	-15.0594	1.01e-35
CNDP2	-15.0412	1.74e-33
DOCK10	-15.0337	5.25e-35
LONP2	-15.0329	5.84e-35
GNS	-15.0272	3.84e-35
FAM8A1	-15.0103	4.3e-34
RPL37A	-14.9938	9.33e-34
NOD2	-14.9717	7.89e-35
BICD2	-14.9456	3.5e-35
E2F2	-14.9393	2.84e-33
MCM7	-14.9258	9.5e-34
MARCHF6	-14.9123	6.07e-35
MBD2	-14.9086	6.23e-35
ATP5F1A	-14.9046	1.06e-44
SZRD1	-14.8926	5.84e-34
CPSF7	-14.889	2.7e-34
LOC122424280	-14.8852	1.35e-34
SPRYD3	-14.884	7.03e-34
PSENEN	-14.8765	2.28e-34
CD37	-14.8759	1.1e-42
CCT5	-14.8729	7.64e-34
ATP6V0E1	-14.8464	8.26e-35
TUT7	-14.8459	5.43e-34
EYA3	-14.8424	2.08e-34
EML3	-14.8423	3.16e-33
UBP1	-14.841	2.5e-34
DEF6	-14.8289	1.66e-32
STRN4	-14.8208	3.08e-33
BASP1	-14.8076	6.08e-33
TGOLN2	-14.7786	1.79e-34
LOC122453764	-14.7751	8.44e-33
STOM	-14.7652	3.28e-34
ESYT1	-14.7484	1.86e-72
RAD23A	-14.726	2.04e-32
LTA4H	-14.6993	2.8e-32
TGFBR2	-14.6972	4.49e-34
SHISA5	-14.6954	1.41e-43
WWP2	-14.6863	1.03e-32
SYTL3	-14.6767	2.61e-31
DPYSL2	-14.6719	1.66e-33
HNRNPR	-14.6664	4.87e-34
LYPLA2	-14.6581	5.01e-33
ATP2B1	-14.649	1.15e-32
CD47	-14.6453	1.54e-31
DKC1	-14.6444	1.35e-32
CNOT6L	-14.6264	1.28e-33
BCL11B	-14.6159	2.09e-33
RAB4B	-14.5985	3.44e-33
NFE2L2	-14.5956	4.23e-33
EPHX2	-14.594	4.2e-31
TBX21	-14.5909	2.04e-30
MED12	-14.5884	1.32e-32
CDC42	-14.5788	9.96e-44
LOC122426554	-14.5604	2.12e-32
LAP3	-14.558	3.15e-33
SUPT16H	-14.5477	3.72e-33
AGPAT1	-14.5445	1.59e-31
RPL9	-14.5395	9.46e-19
UBE2V1	-14.5344	4.44e-33
RPL37	-14.5233	5.02e-32
NMT1	-14.5183	1.08e-32
HSPD1	-14.5153	3.42e-33
SPEN	-14.5004	6.89e-33
TRPM2	-14.4981	1.71e-31
GLB1	-14.4876	7.04e-33
SEPTIN6	-14.4764	1.34e-41
SETD5	-14.4669	5.16e-33
DOCK11	-14.4465	5.14e-32
GTF2I	-14.4404	6.12e-33
BTF3	-14.437	8.33e-33
IFRD2	-14.4327	9.88e-30
SPG11	-14.4259	1.11e-32
UBN1	-14.4035	4.59e-32
LDHB	-14.3863	1.19e-32
ZDHHC3	-14.3587	6.7e-32
RPS13	-14.3453	1.54e-77
CCT8	-14.3301	1.64e-32
WDTC1	-14.3274	6.95e-31
LOC122431107	-14.3262	1.37e-32
GPAT4	-14.3235	6.63e-77
WIPF1	-14.3177	3.85e-31
WIPI2	-14.3117	1.01e-31
TMEM214	-14.3097	2.51e-31
SIDT1	-14.3017	4.31e-32
USP11	-14.2793	1.21e-31
LRPAP1	-14.2763	6.93e-31
BTG1	-14.2714	4.53e-90
BAZ1A	-14.2688	6.02e-31
KPNA6	-14.2671	5.25e-32
TARS1	-14.2611	5.1e-32
SPCS3	-14.2589	3.41e-29
PFKFB4	-14.2587	4.36e-31
MAP3K1	-14.2512	3.15e-29
LOC122429994	-14.2503	9.82e-32
BANK1	-14.2458	7.15e-32
TCP11L2	-14.2454	4.27e-31
PHF3	-14.2388	6.63e-32
GAK	-14.2293	6.77e-39
SP1	-14.2172	5.07e-32
SAMD1	-14.2171	1.67e-30
ANKRD17	-14.2059	8.48e-32
ITPK1	-14.2029	1.96e-30
UBL7	-14.202	4.58e-30
LOC122429361	-14.1909	3.84e-14
CYLD	-14.1868	3.38e-30
HDAC7	-14.1867	1.37e-30
RAB10	-14.1826	1.23e-30
HECTD1	-14.1686	7.09e-31
BCL3	-14.1667	1.76e-30
ECPAS	-14.1635	1.98e-31
UBL5	-14.1512	1.36e-31
OXA1L	-14.1482	4.77e-31
DHX15	-14.145	1.7e-31
RNF20	-14.1434	1.47e-31
SKIV2L	-14.1428	4.14e-30
DNAJB2	-14.1385	4.02e-29
YTHDC1	-14.1323	1.09e-31
U2AF1L4	-14.1243	2.63e-31
ANXA3	-14.124	8.17e-31
PSMD8	-14.1207	5.04e-31
CUL3	-14.1156	5e-31
NSUN2	-14.1152	2.41e-31
GTF3C1	-14.1137	9.87e-31
SSU72	-14.113	3.88e-31
OGFRL1	-14.1125	1.56e-30
PTK2B	-14.1035	3.63e-39
MTMR14	-14.1015	1.79e-30
SERINC1	-14.0999	2.07e-29
RNASET2	-14.0955	1.97e-30
STAG2	-14.0924	1.44e-28
BCL2L13	-14.0918	2.62e-30
SMCHD1	-14.0892	1.83e-29
MIOX	-14.0865	2.52e-29
TNFAIP3	-14.0847	1.27e-30
QKI	-14.0822	1.85e-29
LOC122433928	-14.0814	3.71e-30
HERC5	-14.0799	1.59e-31
CHMP2A	-14.0797	1.55e-30
PAPOLA	-14.0765	1.76e-30
TMEM127	-14.0764	1.38e-38
KIAA0232	-14.0711	2.52e-30
AFG3L2	-14.0697	6.41e-31
MCTP2	-14.0674	2.48e-30
TNPO2	-14.0672	3.12e-30
OTULIN	-14.0638	2.49e-31
PIP5K1A	-14.059	4.79e-31
RASSF2	-14.054	3.29e-31
ARHGEF3	-14.0469	1.05e-30
OARD1	-14.0425	7.54e-31
ORAI3	-14.0328	3.41e-30
POLR2B	-14.0282	3.61e-31
TMEM184B	-14.0251	4.12e-30
SNX20	-14.0247	9.48e-31
EIF4E3	-14.0231	1.22e-30
SRRM2	-14.0196	3.51e-97
LRRK2	-14.008	3.85e-28
EMD	-14.0069	6.74e-30
CMTM7	-13.9961	1e-30
SDHA	-13.9954	5.98e-30
ASAH1	-13.9953	1.08e-30
UBE2D3	-13.9931	2.94e-30
THOC2	-13.9855	9.63e-31
LOC122429810	-13.9776	3.38e-30
TESPA1	-13.9687	8.01e-31
LOC122435630	-13.9626	5.29e-29
BBX	-13.9551	7.74e-31
LOC122431318	-13.9535	3.21e-30
SSH3	-13.9529	6.1e-30
PRKD2	-13.9516	9.57e-29
EMB	-13.9476	1.15e-27
TTYH3	-13.9441	5.06e-30
PEPD	-13.9359	5.74e-30
GBE1	-13.9251	2.03e-29
NEDD9	-13.9208	9.98e-31
STK10	-13.9201	1.6e-72
PINK1	-13.9164	2.29e-30
NKTR	-13.9133	8.99e-30
SNX3	-13.9088	1.12e-30
ERBIN	-13.9	2.15e-27
TIAL1	-13.8896	4.38e-30
PLXDC2	-13.8828	4.34e-30
DHX16	-13.8707	1.71e-29
MBTPS1	-13.8684	2.91e-30
EIF5A	-13.868	5.35e-38
TAPBPL	-13.8676	3.89e-29
LOC122434355	-13.8665	1.17e-29
LOC122422768	-13.857	4.3e-30
CHD2	-13.8567	2.03e-30
LOC122422752	-13.852	3.62e-29
LAS1L	-13.8422	1.16e-29
PSMD7	-13.8389	2.27e-30
MEN1	-13.8319	2.98e-29
HNRNPDL	-13.8313	9.1e-30
ATXN1	-13.8278	7.37e-30
BET1L	-13.8254	6.87e-30
GAB3	-13.8216	3.02e-30
BRD7	-13.8178	2.29e-30
GORASP2	-13.817	5.86e-30
NT5C2	-13.811	3.17e-30
LOC122433063	-13.8088	5.99e-30
TCF3	-13.8079	6.57e-30
MARK3	-13.8061	2.62e-30
UBE2M	-13.8052	4.39e-29
CNOT2	-13.8009	2.88e-30
ARHGEF10L	-13.7972	2.27e-29
TAB1	-13.7947	5.95e-29
SAP130	-13.7896	1.53e-29
NEURL1	-13.7877	5.19e-28
HTT	-13.7812	2.57e-29
MYADM	-13.7797	3.41e-69
TMEM203	-13.7795	9.34e-30
RNF122	-13.776	2.95e-29
MBD1	-13.7673	4.8e-30
RPS10	-13.767	2.49e-36
SUCLG2	-13.7523	1.46e-29
SRP72	-13.7492	4.45e-30
NEU3	-13.7469	6.9e-30
CCAR2	-13.7459	3.65e-37
GPR15	-13.7404	7.73e-28
LDLRAP1	-13.7382	4.46e-29
CLPTM1L	-13.7376	6.1e-30
SESN3	-13.7344	9.35e-29
RLIM	-13.7294	7.99e-29
SP2	-13.7277	4.98e-29
CKB	-13.7238	9.41e-28
MCRS1	-13.7177	3.07e-29
DMTN	-13.7172	1.19e-27
TCP1	-13.7168	1.92e-29
SLC36A1	-13.7147	9.2e-30
ARID3B	-13.7126	9.52e-30
LOC122454552	-13.7101	2.6e-37
RESF1	-13.7073	6.89e-27
TIAM1	-13.7061	1.51e-29
HERC2	-13.6962	8.83e-30
RIT1	-13.6879	8.3e-27
C1R	-13.6798	1.92e-28
TRAPPC11	-13.6725	9.97e-30
CAB39	-13.6694	1.67e-28
RPS6KA3	-13.6671	1.41e-28
ZC3H7A	-13.6566	3.23e-28
STAT4	-13.651	2.24e-29
GNPTAB	-13.6492	2.39e-28
CHKB	-13.6474	1.85e-29
ZNF24	-13.6451	2.95e-28
CD38	-13.6447	1.45e-29
LOC122429717	-13.6422	3.3e-29
PI4K2A	-13.631	2.4e-29
SEH1L	-13.6227	5.3e-29
SENP2	-13.6217	6.98e-28
NUAK2	-13.6192	9.49e-29
OXSR1	-13.6187	1.7e-29
DUSP6	-13.6175	4.16e-28
FBXW11	-13.6165	6.09e-29
PROK2	-13.616	1.98e-28
PRR5	-13.6148	1.9e-28
LGMN	-13.6049	5.28e-38
FIP1L1	-13.6046	9.85e-29
HGSNAT	-13.6035	1.72e-28
ANKS1A	-13.6022	3.25e-29
TMPO	-13.6012	8.58e-28
LIG1	-13.5994	1.21e-27
RBM47	-13.5987	1.03e-28
CDK5RAP2	-13.5963	3.23e-28
NT5DC3	-13.5827	6.18e-29
ZPR1	-13.5824	4.31e-29
SMS	-13.5819	7.21e-29
ARL5A	-13.578	4.38e-27
CD96	-13.5764	1.4e-27
NPTN	-13.575	6.43e-29
LOC122420597	-13.5708	6.26e-29
KANSL2	-13.5698	2.5e-29
TLN1	-13.5619	7.63e-133
HAL	-13.5599	5.25e-28
ATP5PF	-13.5587	4.48e-29
TECPR1	-13.5568	1.9e-28
PPP3CA	-13.5509	6.03e-29
IGF1R	-13.55	2.03e-28
PSMD6	-13.5492	3.74e-29
LOC122424044	-13.5486	5.87e-29
CHST11	-13.543	1.01e-28
RPL18	-13.5395	5.36e-113
ANKRD13D	-13.5301	1.28e-28
LOC122432998	-13.5252	6.96e-29
RCC2	-13.5229	7.98e-37
LOC122419678	-13.5217	8.78e-27
BRPF3	-13.521	7.07e-28
TMCO6	-13.5207	1.3e-28
RPL34	-13.5199	5.49e-26
JCHAIN	-13.5172	5.67e-27
ANTXR2	-13.5131	3.14e-37
RIPOR1	-13.513	2.77e-28
SMIM10L1	-13.5096	2.13e-27
ZADH2	-13.5083	6e-29
EMC1	-13.5008	2.04e-28
RBL2	-13.4956	7.41e-28
TMEM222	-13.4867	3.54e-28
CLEC4E	-13.486	1.01e-26
RAP1GDS1	-13.4788	8.95e-29
DHDDS	-13.4753	5.76e-28
ARPC1B	-13.4726	1.36e-108
TADA3	-13.4716	4.91e-28
CARD6	-13.4711	5.97e-29
TRIM11	-13.4708	6.86e-28
ARL6IP5	-13.4628	1.03e-28
NR1H3	-13.4477	5.83e-28
AMMECR1L	-13.4465	1.31e-28
TRIM27	-13.4449	1.95e-28
METAP2	-13.4371	1.25e-28
PCMTD1	-13.4339	2.99e-27
RIC8A	-13.4322	8.41e-28
TDRD7	-13.4275	1.16e-28
ODF2	-13.426	1.2e-28
CD2BP2	-13.4202	3.27e-28
SYNE2	-13.4194	1.67e-27
AFF1	-13.4142	1.05e-27
MGST1	-13.412	5.79e-28
SREK1	-13.4116	3.84e-28
SLC25A38	-13.4061	2.6e-28
SMAD2	-13.4048	1.26e-28
TBCB	-13.3987	5.05e-28
SPIB	-13.3745	9.6e-27
TBXA2R	-13.3699	1.99e-26
SPPL3	-13.3699	2.13e-28
VARS2	-13.3596	1.29e-26
TYSND1	-13.3468	2.21e-27
EGLN2	-13.3393	7.23e-35
RPL7L1	-13.3383	3.13e-28
TNS2	-13.3353	1.88e-26
PPP1R37	-13.3106	6.48e-27
NDUFS1	-13.31	7.47e-28
LOC122435848	-13.3094	3.32e-24
RANBP9	-13.3056	3.68e-28
TACC1	-13.2951	1.95e-52
PLEKHG2	-13.2924	1.43e-26
ATIC	-13.2923	6.14e-28
SPNS1	-13.2907	1.27e-26
PPP1R15A	-13.2899	4.22e-28
PSTPIP2	-13.2885	1.05e-27
TTLL4	-13.2871	6.61e-27
SLC25A29	-13.2807	3.45e-27
HTATSF1	-13.2727	3.97e-28
WDFY1	-13.272	1.46e-27
EGLN3	-13.2709	9.9e-28
ACAA2	-13.2615	8.64e-28
TNRC18	-13.2539	4.05e-35
HIVEP2	-13.2536	5.17e-28
PRPF4B	-13.25	5.19e-28
SMIM7	-13.2435	4.96e-27
HMGCS1	-13.2409	1.29e-27
ATP6AP2	-13.2326	3.2e-25
BAG4	-13.2301	4.14e-27
LOC122429575	-13.2237	5.11e-25
RNF125	-13.2236	2.51e-27
LOC122455063	-13.2171	1.56e-34
RIOK1	-13.2164	1.08e-27
KDM6A	-13.2125	9.14e-27
LOC122427080	-13.212	3.84e-25
MAGED2	-13.1982	1.67e-26
LOC122421552	-13.1976	1.17e-25
RNF135	-13.1929	1.73e-27
SERTAD2	-13.1925	3.31e-27
PLEC	-13.1857	4.28e-77
MAP3K5	-13.1856	1.21e-27
RFXANK	-13.1796	3.86e-27
SHARPIN	-13.179	3.12e-26
TOM1	-13.1768	1.26e-26
PRKCB	-13.1766	3.08e-70
CHPT1	-13.1695	2.38e-25
PER1	-13.1694	1.98e-25
TUBA1B	-13.1558	1.68e-81
GK	-13.1518	9.13e-27
KIF2A	-13.149	1.71e-26
ERLIN2	-13.1469	1.37e-27
PMM2	-13.1468	3.32e-27
USP25	-13.1453	8.44e-27
ZC3H7B	-13.1389	3.26e-27
ATXN1L	-13.1358	2.56e-27
UBQLN4	-13.1326	9.15e-27
APOBEC3B	-13.1311	3.26e-27
SEC11A	-13.1301	1.79e-27
TBC1D10A	-13.124	1.18e-26
LCMT1	-13.1209	4.47e-27
BACH2	-13.1196	3.78e-27
PSMD5	-13.1192	3.33e-27
NFYA	-13.1149	3e-27
SCAF1	-13.1119	2.24e-25
PXK	-13.1103	2.96e-27
TCF4	-13.1085	5.04e-27
NFE2	-13.108	1.1e-88
SH3BGRL	-13.1078	1.43e-23
INPP1	-13.1013	1.37e-26
PAX5	-13.1005	3.73e-27
ATG101	-13.1	2.03e-26
ZNF652	-13.0999	2.72e-27
DICER1	-13.0979	8.15e-27
TTC38	-13.094	1.35e-26
NSDHL	-13.0915	1.04e-26
TBRG1	-13.0886	2.18e-27
LOC122432994	-13.0792	5.04e-23
PRKAG1	-13.0714	6.16e-27
PRPSAP1	-13.0712	6.76e-27
DDHD2	-13.0665	9.29e-27
CLEC7A	-13.0657	1.37e-21
LONRF3	-13.0613	1.61e-26
ABCC1	-13.0511	5.56e-35
LOC122432858	-13.0494	3.62e-27
ATL3	-13.0478	1.53e-25
SERPINA1	-13.0376	1.81e-24
MFF	-13.0364	1.78e-24
MPST	-13.034	2.04e-25
RGS14	-13.0249	1.29e-49
FMNL3	-13.0236	5.41e-25
ELP1	-13.0154	6.14e-27
UBQLN1	-13.0148	3.8e-35
NUDT4	-13.0119	2.01e-26
HPSE	-13.0078	1.35e-26
PIM1	-13.0077	8.51e-75
ATXN7	-13.0044	3.47e-26
TMEM30A	-13.0025	6.63e-24
TMSB10	-13.0013	NA
PLAA	-12.9988	5.99e-27
CD19	-12.9968	4.32e-26
TRAPPC14	-12.9966	2.13e-26
ACOT9	-12.9927	5.93e-27
PDS5A	-12.992	2.89e-26
GOLGA7	-12.9917	8.02e-27
ETV6	-12.9828	2.74e-59
STK35	-12.982	7.62e-27
TFG	-12.9785	7.52e-27
USF2	-12.977	1.37e-33
SNRPA1	-12.9674	1.19e-26
CD99	-12.9673	2.05e-104
IFFO2	-12.962	1.07e-26
TXNDC5	-12.9612	8.04e-26
TLNRD1	-12.9531	1.25e-26
GSE1	-12.9456	1.55e-26
TMEM33	-12.943	1.68e-24
INTS13	-12.9412	2.16e-26
LOC122421663	-12.9411	1.66e-26
PALM	-12.9384	4.06e-25
UBE3A	-12.9376	3.09e-25
PPP5C	-12.9336	2.04e-26
NABP1	-12.9312	2.12e-24
WRNIP1	-12.9215	1.01e-26
PHF10	-12.9161	1.74e-26
SPPL2A	-12.914	7.95e-25
HADH	-12.91	2.55e-26
SND1	-12.9069	4.07e-57
RAB21	-12.9068	1.7e-25
HDAC2	-12.8966	3.02e-25
LOC122426487	-12.8961	3.75e-26
LOC122431024	-12.8921	1.01e-24
PCBP4	-12.8868	6.94e-26
OSBPL8	-12.8853	1.14e-23
SIAH1	-12.8844	3.06e-25
NLRX1	-12.8813	2.22e-25
PRMT2	-12.8765	2.02e-26
PAPSS1	-12.8718	2.13e-26
PDCD6	-12.8706	1.52e-26
ICE1	-12.8694	6.61e-26
LOC122433216	-12.8625	6.4e-26
TMEM229B	-12.862	6e-26
MICALL1	-12.8543	1.94e-25
LOC122427483	-12.8486	2.84e-26
LOC122434156	-12.8414	6.27e-24
LOC122429743	-12.8391	1.76e-24
GABPA	-12.8364	1.2e-24
ARMCX3	-12.8362	3.35e-25
PLOD1	-12.8324	3.14e-25
RGL2	-12.8319	7.37e-58
NFIL3	-12.8293	1.95e-33
RASGEF1B	-12.8208	1.02e-25
SIAH2	-12.8207	1.36e-25
DYM	-12.8184	3.46e-26
INTS4	-12.8143	6.85e-26
CXCR6	-12.8137	7.03e-25
ST3GAL1	-12.8123	4.12e-32
RAB1B	-12.812	1.84e-57
XRCC1	-12.8105	2.26e-25
PSMA6	-12.8064	1.24e-25
BCOR	-12.8063	9.68e-26
PPIL4	-12.8057	8.82e-25
TP53BP1	-12.8009	7.82e-26
RCOR1	-12.7999	2.24e-25
COG8	-12.7978	3.89e-25
RTN3	-12.797	4.93e-48
GRAMD4	-12.796	4.72e-26
SMPDL3A	-12.7954	2.3e-25
PON2	-12.7896	6.32e-26
IRAG2	-12.7826	5.86e-25
PAPSS2	-12.7775	1.11e-25
TASOR	-12.7756	1.63e-23
PCM1	-12.7724	6.77e-25
SENP6	-12.772	1.06e-23
IL21R	-12.7708	7.52e-25
ST3GAL4	-12.7694	1.36e-25
CXXC1	-12.7603	1.12e-31
ZC3H12D	-12.7592	5.29e-26
COPS7B	-12.7586	1.28e-25
NOL10	-12.7529	6.44e-26
FTO	-12.7527	4.1e-25
SNRPA	-12.7521	3.22e-25
STX7	-12.7508	7.52e-24
CLDND1	-12.746	2.32e-24
LMAN1	-12.7431	3.65e-25
CRBN	-12.7429	1.28e-25
LOC122431037	-12.7416	9.31e-26
PLOD3	-12.7349	3.42e-25
HPRT1	-12.7335	1.3e-23
LOC122433156	-12.7325	2.62e-25
ARMCX2	-12.7303	1.67e-25
TASOR2	-12.7253	6.44e-25
LOC122419788	-12.7238	8.74e-25
XRCC5	-12.72	2.53e-25
GPD2	-12.7195	8.18e-24
ARHGAP18	-12.7188	6.96e-25
STAG1	-12.7179	1.83e-25
NFKBIB	-12.7119	2.9e-24
JMJD8	-12.7057	5.36e-25
PPP1R3B	-12.7052	9.06e-60
ZNF865	-12.7029	3.62e-25
MTMR1	-12.7005	2.26e-25
APOBEC3A	-12.6946	9.3e-246
LOC122432513	-12.6897	8.25e-26
SLAIN2	-12.6885	1.38e-25
MAGT1	-12.6867	5.84e-23
CCDC115	-12.6848	1.65e-25
UBA2	-12.6829	6.52e-25
CNOT7	-12.6797	7.17e-24
OLA1	-12.6764	1.33e-25
TGIF1	-12.6755	1.8e-25
ALG12	-12.6728	6.64e-25
IMP3	-12.6697	1.8e-25
TXN	-12.6665	1.01e-24
CASTOR2	-12.6579	2.35e-24
APAF1	-12.6559	3.81e-24
CDK19	-12.6481	1.88e-24
HSPE1	-12.6473	3.14e-25
LRRFIP2	-12.644	3.87e-25
LOC122422583	-12.6333	5.16e-25
MIA2	-12.63	2.09e-24
BMP2K	-12.6255	6.6e-25
DAG1	-12.6233	1.03e-24
ZXDC	-12.623	2.13e-24
PGRMC2	-12.6217	2.58e-25
RCC1L	-12.6207	3.17e-24
TMEM268	-12.6193	2.43e-25
MTREX	-12.6187	1.47e-24
MCM9	-12.6154	1.72e-25
RNF10	-12.6144	1.18e-136
VSIG4	-12.6001	9.52e-24
LOC122425620	-12.5941	1.36e-24
PSMA1	-12.5899	1e-23
FAM20C	-12.5884	4.46e-25
WWP1	-12.588	4.57e-24
SLC25A51	-12.5866	5.69e-24
TENT4B	-12.5854	1.89e-24
TLK1	-12.5849	2.35e-24
ORMDL2	-12.5816	5.51e-25
SLK	-12.5784	6.77e-24
ZNF407	-12.5724	1.54e-24
C27H21orf91	-12.5707	1.72e-22
PIKFYVE	-12.5691	1.15e-23
DSEL	-12.5691	1.52e-24
VCAN	-12.569	3.01e-53
PHC1	-12.5653	1.02e-23
PRPF18	-12.5645	4.36e-25
PROSER1	-12.5634	2.87e-25
OPA1	-12.5628	8.98e-25
RPTOR	-12.5608	1.24e-24
CMTM6	-12.5599	3.5e-59
NAGPA	-12.5595	1.59e-24
CPSF2	-12.5591	1.16e-24
TENT2	-12.5591	1.07e-24
LOC122424900	-12.5572	9.6e-25
E2F3	-12.5518	1.63e-24
CSTF2	-12.55	2.99e-25
DPP4	-12.5455	1.4e-24
USP16	-12.5441	6.09e-24
TLR1	-12.5379	6.39e-24
LOC122435468	-12.5305	1.29e-24
GPX1	-12.5296	4.74e-129
LOC122421177	-12.5251	1.31e-24
AP1S1	-12.5194	1.48e-24
NFAM1	-12.5176	2.89e-99
TKFC	-12.5158	1.08e-23
IP6K2	-12.515	4.63e-25
TMEM140	-12.514	3.48e-31
PCNX3	-12.5138	1.56e-30
ARG1	-12.5136	2.42e-21
TEX261	-12.5107	7.86e-25
BCORL1	-12.4989	2.03e-24
CGGBP1	-12.4987	7.87e-31
TMEM43	-12.4984	5.67e-25
NDE1	-12.4887	2.09e-24
SUSD1	-12.4861	2.18e-24
WDR20	-12.486	1.08e-24
CCNG2	-12.4844	9.66e-22
PITRM1	-12.4824	2.55e-24
VPS4B	-12.4816	8.01e-25
NRGN	-12.4769	5.08e-22
PWP1	-12.4768	5.97e-25
SMURF2	-12.4766	2.2e-24
LOC122420094	-12.4686	1.82e-24
AGPS	-12.467	3.92e-23
LMBRD1	-12.4626	2.89e-24
GPR68	-12.4621	9.07e-24
EIPR1	-12.4608	8.89e-24
COPS4	-12.4578	1.51e-24
MDN1	-12.4573	1.41e-24
PTK2	-12.4558	9.98e-25
CARS1	-12.4516	4.08e-31
TMEM185A	-12.4507	1.29e-24
TFCP2	-12.446	1.18e-24
RAB31	-12.442	2.72e-129
FIG4	-12.4381	1.04e-24
NPC2	-12.435	1.21e-58
CBLB	-12.4341	7.69e-24
CLN8	-12.4326	8.55e-24
CWC22	-12.4243	1.26e-24
ZC3H15	-12.4134	1.25e-22
LOC122431228	-12.4128	1.7e-24
PRF1	-12.412	1.09e-35
DHX30	-12.4038	7.87e-31
LOC122420181	-12.3985	1.96e-71
GTF2H4	-12.398	8.03e-24
STRN	-12.3978	6.28e-24
IL3RA	-12.3973	1.45e-23
RAI1	-12.3951	1.35e-23
OVCA2	-12.3938	4.27e-24
TSPAN32	-12.3864	1.48e-23
UTP3	-12.3792	1.44e-24
PDXK	-12.3783	2.66e-24
TCF12	-12.3738	7.75e-24
TKT	-12.3648	3.62e-191
NAA35	-12.362	2.65e-24
PAGR1	-12.3522	7.71e-24
MAN1A1	-12.3494	9.71e-22
OBSL1	-12.3491	4.67e-22
SRGAP3	-12.3455	6.7e-24
UBA3	-12.345	1.95e-23
ZNF322	-12.3412	4.85e-23
SNRNP200	-12.3401	2.18e-90
S100A10	-12.3369	1.38e-82
GOLM1	-12.3368	4.64e-24
SYF2	-12.332	2.48e-23
AMDHD2	-12.3291	4.64e-24
HERC6	-12.329	1.54e-21
SEC24D	-12.3281	2.51e-24
PTPRR	-12.3265	3.97e-23
DCP1B	-12.3248	1.08e-23
MTMR12	-12.3246	4.71e-24
LOC122431639	-12.3235	4.69e-24
PTGER4	-12.3168	6.44e-31
HMGXB4	-12.3097	5.8e-24
C32H16orf72	-12.3064	2.54e-31
TMEM165	-12.3064	8.06e-23
PRDX1	-12.3031	2.63e-56
RSRP1	-12.3011	8.09e-23
RPS6KA2	-12.298	1.97e-23
WDR7	-12.2977	4.49e-24
LOC122432541	-12.2925	1.56e-23
PAK1IP1	-12.2915	3.6e-24
UBQLN2	-12.289	4.28e-24
SPTY2D1	-12.2863	6.23e-23
EFL1	-12.2852	1.27e-23
PRKAA1	-12.2811	8.88e-23
KIF24	-12.2809	8.91e-24
DAPK1	-12.2786	6.13e-24
MOSPD3	-12.2723	2.51e-23
MIB1	-12.2675	1.15e-22
LOC122431080	-12.2658	5.81e-136
ABITRAM	-12.2608	8.52e-24
GLIPR1	-12.2529	1.51e-55
IDH1	-12.2527	8.39e-24
PHKA2	-12.2336	1.11e-23
DSE	-12.2311	1.86e-23
SLC1A4	-12.2307	1.08e-23
TEC	-12.2277	7.21e-24
PPP3CC	-12.2271	1.12e-23
MRPS12	-12.2257	4.57e-23
NAP1L4	-12.2246	3.18e-31
ZNF394	-12.2202	1.76e-23
STRADB	-12.215	6.76e-23
P4HA1	-12.2135	5.01e-23
TARM1	-12.2109	1.69e-65
PIM3	-12.2105	7.37e-24
FGD3	-12.2104	6.01e-79
CSRNP2	-12.2104	8.66e-24
SLC31A2	-12.2066	1.58e-23
TRIM32	-12.205	2.42e-23
DIS3L2	-12.2041	2.09e-23
WDR75	-12.2028	1.47e-23
TM7SF3	-12.1988	8.23e-23
CPOX	-12.1965	3.97e-23
TMEM225B	-12.1932	1.1e-23
AARS1	-12.1905	5.78e-51
PLCG2	-12.1893	2.27e-30
CD180	-12.1879	8.65e-24
ETFA	-12.1813	8.12e-24
MICOS10	-12.1784	1.06e-23
ACOX3	-12.1779	2.88e-23
GINS2	-12.1777	7.65e-24
MPPE1	-12.1765	1.08e-23
LOC122420647	-12.1757	2.53e-19
ZSCAN29	-12.1734	1.04e-23
TANK	-12.1707	2.17e-21
HTATIP2	-12.1654	6.24e-23
SSNA1	-12.1634	3.44e-23
RAD9A	-12.1626	7.4e-23
SLTM	-12.1588	1.73e-30
MED10	-12.1582	1.49e-23
CDC26	-12.1562	1.16e-23
SACM1L	-12.1485	1.01e-22
PRKAB1	-12.1468	9.54e-30
FTSJ1	-12.1465	1.5e-23
DYNC1LI2	-12.1462	2.31e-23
LOC122431945	-12.1459	2.03e-22
LOC122428193	-12.1449	2.2e-13
SLC39A13	-12.1441	1.55e-23
LTN1	-12.1364	4.99e-22
PWP2	-12.1359	3.83e-23
PRKCD	-12.1334	2.53e-85
ZBTB44	-12.1243	4.17e-22
MCM5	-12.124	2.29e-27
NHLRC2	-12.1236	1.54e-22
EIF3L	-12.1191	3.54e-66
RAB32	-12.1175	6.4e-23
RUNX3	-12.1175	2.03e-83
CHORDC1	-12.1009	6.95e-22
SLC7A6OS	-12.0981	1.76e-23
CD6	-12.094	4.07e-67
TTI2	-12.0843	2.07e-23
FLOT1	-12.0822	2.87e-53
BLOC1S3	-12.0778	1.1e-22
NIPAL3	-12.071	7.6e-58
LOC122435289	-12.0691	3.05e-22
TRIM68	-12.0679	4.01e-23
CD9	-12.0674	1.92e-23
SCAF4	-12.0664	9.36e-30
MPG	-12.0662	1.85e-23
FAM177A1	-12.0652	2.8e-20
THEMIS	-12.0613	1.72e-22
TMEM260	-12.0585	5.26e-22
ACSS3	-12.0576	1.53e-22
LOC122429837	-12.0572	5.22e-23
NEMP1	-12.0559	5.74e-23
TTC3	-12.0553	3.37e-23
SLX1A	-12.0539	3.46e-60
UNC93B1	-12.053	1.21e-53
LOC122422364	-12.0519	1.15e-20
TFIP11	-12.0512	2.67e-28
AZI2	-12.0511	3.09e-22
RAP2C	-12.049	4.05e-22
MAP4K1	-12.0489	1.83e-60
PSMB2	-12.0462	2.03e-28
SLC44A1	-12.0452	6.16e-22
DYNC1I2	-12.0409	2.42e-30
NUDT19	-12.0391	4.22e-23
MAP3K12	-12.0347	8.22e-23
CAPNS1	-12.0303	1.59e-131
LOC122455089	-12.0289	8.08e-12
TMEM175	-12.0261	1.51e-22
SH3BGRL3	-12.025	9.3e-128
RWDD4	-12.025	7.91e-21
LIN37	-12.0182	1.7e-22
SELENOS	-12.015	3.35e-23
WDR77	-12.0122	5.06e-23
THOC1	-12.0081	5.86e-23
ZNF827	-12.0047	5.17e-23
GINM1	-12.0037	5.39e-22
CADM4	-12.0029	1.66e-22
CMBL	-12.0007	1.66e-22
TUT1	-11.9963	3.84e-22
POLA1	-11.9954	8.96e-23
RNMT	-11.9927	1.8e-22
POMK	-11.9906	3.19e-22
ZSWIM6	-11.9882	3.26e-22
ZNF275	-11.9756	5.18e-23
TNRC6C	-11.9755	2.54e-29
TMEM209	-11.9647	9.16e-23
NR1D2	-11.9606	2.34e-21
SP140	-11.9575	8.03e-87
SLC25A5	-11.9536	2.3e-29
VMA21	-11.9498	2.31e-19
MED23	-11.9447	2.43e-22
FUNDC2	-11.9323	6.11e-23
GPRIN3	-11.9294	9.31e-22
FBXL18	-11.9267	6.04e-22
CYTH4	-11.9217	2.32e-145
TM2D2	-11.9216	3.15e-22
TNKS	-11.9193	1.81e-22
NSMCE3	-11.9189	8.06e-23
LOC122428204	-11.9153	1.06e-22
AGA	-11.9121	1.39e-22
RTTN	-11.911	1.02e-22
TNFRSF1B	-11.9106	2.08e-211
IDH3A	-11.9061	1.08e-22
PGAM1	-11.9045	1.57e-102
SLC39A6	-11.8984	4.77e-21
CCNYL1	-11.8961	8.6e-21
MAPK8IP2	-11.8905	9.32e-22
MBNL3	-11.8853	1.95e-20
NKIRAS1	-11.8852	1.1e-21
CPPED1	-11.8847	5.79e-22
SDAD1	-11.8843	5.23e-22
ORC2	-11.8808	1.89e-20
ASAP3	-11.8778	7.48e-22
PSMD14	-11.8775	1.68e-21
IRAK4	-11.8757	4.8e-21
RELCH	-11.8755	3.11e-21
BTBD1	-11.87	3.21e-21
DDX28	-11.8682	4.45e-22
PCK2	-11.8678	2.23e-27
UBR3	-11.866	1.9e-21
FAM118A	-11.865	2.31e-22
CPEB4	-11.8631	2e-20
RUFY3	-11.8613	5.42e-22
TSR1	-11.8581	1.2e-22
SUCLA2	-11.8541	4.05e-22
STAM2	-11.8528	2.82e-21
UFC1	-11.8404	1.77e-29
MAP2	-11.8314	2.55e-21
GTF2E2	-11.8282	1.55e-22
HMGN4	-11.8275	9.35e-22
ACSL3	-11.8211	9.45e-22
IDS	-11.8195	2.61e-22
DERA	-11.8194	1.88e-22
TXNRD3	-11.8183	2.33e-22
HACE1	-11.8172	6.09e-22
IMPA2	-11.8145	5.43e-22
CDKAL1	-11.8137	2.09e-22
TFDP1	-11.8119	2.92e-22
SOX12	-11.8106	6.21e-21
FAM200B	-11.8071	1.68e-12
LYAR	-11.8068	5.81e-22
NOL7	-11.8058	5.67e-22
RAB18	-11.8031	2.81e-20
UGP2	-11.8011	1.4e-51
HERC3	-11.7957	4.83e-28
TCF19	-11.795	2e-21
FAM168B	-11.7948	3.19e-51
ERGIC1	-11.794	1.01e-50
MCAT	-11.7908	9.43e-22
IRGQ	-11.7885	9.91e-22
PEX3	-11.7824	7.96e-22
PITHD1	-11.7776	2.78e-22
SFT2D1	-11.7756	3.14e-21
TRNT1	-11.7754	8.24e-22
USP15	-11.7742	2.53e-20
ENOX2	-11.7738	4.94e-22
CHMP2B	-11.7731	3.59e-21
TTC13	-11.7692	7.84e-22
ITPRID2	-11.7599	2.65e-21
TXK	-11.755	1.83e-21
SLC5A3	-11.7531	6.22e-20
ZFX	-11.7504	1.01e-20
ZNF236	-11.7497	4.26e-21
LOC122453721	-11.7488	1.99e-21
NIPBL	-11.7453	1.85e-52
ABI2	-11.741	1.49e-21
HAUS7	-11.7401	3.49e-21
LOC122421553	-11.7372	2.12e-20
YY1	-11.7366	1.12e-27
TUBB1	-11.729	2.16e-117
NAB2	-11.727	5.95e-21
ERICH1	-11.7236	1.58e-21
VXN	-11.7232	1.5e-21
B4GALT1	-11.7175	4.9e-111
TNRC6A	-11.7171	2.11e-52
RGS3	-11.716	9.07e-39
ATP10D	-11.7105	1.04e-21
CCNT1	-11.7104	5.25e-28
SARS2	-11.7093	3.27e-21
DRAM1	-11.7005	4.16e-21
ZNF451	-11.6998	2.57e-21
EXOSC7	-11.6918	1.08e-21
NFKBIE	-11.6881	1.06e-21
RORC	-11.6834	1.67e-21
PJA2	-11.672	1.01e-26
ABCA1	-11.6689	3.4e-19
DEXI	-11.6648	1.17e-21
S100A8	-11.6632	5.97e-41
LOC122455070	-11.6556	4.92e-18
NLE1	-11.6524	1.34e-21
ELOVL4	-11.652	2.54e-20
LOC122432813	-11.6499	1.57e-21
GCLC	-11.6467	2.34e-21
TSPAN5	-11.6459	7.52e-22
ADAM9	-11.6451	3.76e-20
VWF	-11.643	3.02e-19
ZCRB1	-11.6405	1.34e-21
PCBD1	-11.6336	9.31e-22
LOC122454861	-11.6331	1.95e-21
SGSM3	-11.6331	2.31e-20
GUSB	-11.6273	6.48e-28
LOC122455109	-11.6271	4.04e-18
ITGAV	-11.6265	3.1e-19
THOC7	-11.6259	3.64e-20
ZNF655	-11.6196	1.07e-19
PPP1R7	-11.6152	8.91e-27
ARL1	-11.6102	2.37e-20
IBTK	-11.6091	3.04e-20
MED29	-11.6077	3.9e-21
NIPAL1	-11.6027	3.91e-20
RPN1	-11.601	5.11e-88
TMEM101	-11.5994	1.66e-21
GOPC	-11.5971	9.77e-20
FARS2	-11.5909	8.8e-21
AHI1	-11.5888	2.33e-21
LOC122432984	-11.5863	4.65e-21
FBXO7	-11.5845	5.67e-28
ZNF516	-11.5809	4.3e-21
TTLL1	-11.5798	1.78e-21
REXO5	-11.5787	4.23e-21
TASL	-11.5755	2.53e-20
TRANK1	-11.5689	7.54e-62
ITGA4	-11.5654	1.26e-66
CD226	-11.5643	3.66e-20
FAM118B	-11.5617	1.58e-21
YBX3	-11.5609	2.38e-48
DLC1	-11.5608	3.33e-21
SPRTN	-11.5595	8.21e-21
ARL8B	-11.5589	1.44e-26
TRAPPC12	-11.5567	4.59e-47
UGDH	-11.5524	3.11e-21
GCNT2	-11.5498	1.95e-21
POT1	-11.5487	1.84e-20
CREBZF	-11.5432	3.08e-19
PADI6	-11.5361	2.32e-20
RAB28	-11.5344	6e-21
ZGPAT	-11.5293	3.66e-37
NBEAL2	-11.5199	1.31e-99
FKTN	-11.5193	5.88e-21
MCPH1	-11.514	8.65e-21
ANK1	-11.5089	1.42e-20
CTPS2	-11.5064	1.11e-20
LOC122431143	-11.5055	4.46e-27
TM2D3	-11.5024	3.62e-21
SNRPN	-11.5009	1.82e-20
NKAPD1	-11.5001	3.58e-20
SWAP70	-11.5	6.6e-28
SREBF1	-11.5	1.18e-26
ST6GALNAC6	-11.4981	8.63e-28
ERMARD	-11.4968	6.93e-21
ACSL1	-11.4939	1.66e-27
ZBTB14	-11.4866	6.08e-20
BBS1	-11.4864	6.33e-21
USP49	-11.4838	7.29e-21
BCL2A1	-11.4834	6.08e-21
CD69	-11.4827	7.67e-18
MAST4	-11.4803	1.11e-20
ZFC3H1	-11.4794	4.98e-25
RPS4X	-11.4787	3.48e-209
PLPP1	-11.4763	3.43e-21
LOC122429937	-11.4686	1.29e-20
GDF11	-11.4673	8.86e-21
IGF2R	-11.4624	1.5e-97
FAM219A	-11.4609	4.63e-21
ZFP90	-11.4605	2.02e-20
AEBP2	-11.4601	1.49e-20
LOC122431348	-11.4574	2.36e-37
LOC122455237	-11.4536	5.18e-21
CALHM6	-11.4511	1.17e-19
BTBD7	-11.4508	8.94e-21
TRIAP1	-11.4494	1.42e-20
KMT5C	-11.4483	9.58e-21
REL	-11.4453	3.07e-20
IDH3G	-11.4369	2.21e-46
VSIR	-11.4355	1.43e-258
TLR7	-11.4333	2.34e-26
AIMP1	-11.4321	1.15e-20
TCF20	-11.4286	7.46e-74
ATG4A	-11.4282	2.96e-19
UFL1	-11.4278	2.15e-20
SLC38A9	-11.4232	6.72e-20
MAZ	-11.4227	1.3e-76
LOC122426885	-11.422	2.14e-25
C33H6orf120	-11.4219	9.32e-20
EEA1	-11.4213	8.39e-20
ZNF189	-11.4175	1.61e-20
SCFD2	-11.4154	1.68e-20
SESN2	-11.4147	1.7e-20
GTPBP2	-11.4141	1.65e-49
XNDC1N	-11.4109	3.19e-20
WDR44	-11.4089	8.72e-20
LOC122421547	-11.4079	2.78e-20
NR2C1	-11.403	5.06e-19
CCDC28A	-11.403	2.19e-20
LTBR	-11.4001	4.26e-26
LOC122435344	-11.3955	9.23e-21
PPA2	-11.3949	7.32e-21
SLC25A17	-11.3924	8.57e-21
ACVRL1	-11.3864	9.14e-26
PRRC1	-11.3833	1.39e-20
BIN1	-11.3792	1.73e-70
LOC122424523	-11.3791	1.06e-20
NEK6	-11.3786	5.25e-27
NOP58	-11.3748	5.95e-27
LOC122420667	-11.3733	2.75e-19
SETD6	-11.3731	2.29e-20
TBCK	-11.3729	9.2e-21
UBA6	-11.371	1.2e-19
GAB2	-11.369	6.04e-150
LETMD1	-11.3647	1.14e-20
XPOT	-11.3629	4.45e-26
TMEM106C	-11.3601	8.16e-21
SERPINE2	-11.3599	2.87e-25
SNRNP25	-11.35	9.52e-21
ABHD3	-11.3458	2.02e-20
PPP1R2	-11.3414	4.55e-18
TM9SF1	-11.3373	3.3e-49
ASF1A	-11.3365	1.92e-20
LOC122420022	-11.3357	1.22e-20
STRN3	-11.3344	1.86e-19
COPG1	-11.3283	1.54e-74
SEPTIN1	-11.327	1.55e-97
PPID	-11.3246	1.27e-26
WDR5	-11.3246	8.19e-27
CD81	-11.3229	1.06e-161
CCDC9	-11.3224	9.34e-42
NDUFA12	-11.3201	1.42e-20
RASGRP1	-11.319	4.25e-47
LRRC28	-11.3173	2.23e-20
EXOSC6	-11.3118	2.86e-20
DOCK5	-11.3112	4.88e-20
HYAL2	-11.3094	4.76e-20
EIF4E	-11.3077	4.3e-17
MPC1	-11.3074	1.48e-20
PPWD1	-11.3026	2.87e-19
OPTN	-11.3014	1.73e-26
EOMES	-11.3001	6.39e-20
TPGS2	-11.299	3.85e-20
CERS6	-11.2986	9.21e-19
ZNF579	-11.2971	2.31e-19
LOC122455131	-11.2907	2.3e-20
PPP4R1	-11.2814	1.31e-47
IL5RA	-11.2796	2.83e-20
LOC122435269	-11.273	3.2e-101
FKBP4	-11.2706	5.62e-43
LOC122427221	-11.2688	8.22e-20
HEATR5A	-11.2682	4.61e-19
ALPK1	-11.2645	4.87e-19
ZUP1	-11.2643	1.95e-18
SLC12A2	-11.2621	1.05e-18
PCED1A	-11.2611	7.23e-20
PHF8	-11.2603	4.54e-37
SLC27A1	-11.2581	4.42e-20
IPO11	-11.2568	5.66e-19
PLA2G4A	-11.2563	1.45e-18
ABT1	-11.2538	4.04e-20
OCEL1	-11.2431	7.66e-25
GDE1	-11.2389	2.34e-20
IKZF2	-11.2383	6.75e-19
ISOC2	-11.2353	8.77e-20
MAP4	-11.2338	9.32e-80
NECAB2	-11.2313	1.33e-16
SHCBP1	-11.2262	1.39e-17
PPM1K	-11.226	4.42e-19
DNASE1L3	-11.2222	4.03e-20
LOC122426544	-11.2206	1.1e-101
ZDHHC17	-11.2166	7.62e-18
SMARCC1	-11.2158	2.53e-68
VEZT	-11.2155	1.73e-18
OPRL1	-11.2121	4.52e-20
MSRB1	-11.2112	1.73e-61
LDOC1	-11.2079	1.89e-18
LOC122427559	-11.2073	7.66e-59
LOC122427586	-11.2068	9.79e-19
RBM48	-11.2059	6.34e-20
LOC122429801	-11.203	2.77e-20
LOC122426640	-11.201	4.4e-20
RAB11FIP1	-11.1997	4.18e-79
SH3GLB1	-11.1953	1.25e-46
ZNF319	-11.1952	9.4e-20
TNFRSF21	-11.1833	1.39e-48
P2RX1	-11.181	3.63e-25
LOC122433032	-11.1643	4.37e-26
PTGDR2	-11.16	9.8e-39
GPD1L	-11.1515	1.09e-19
LOC122434601	-11.1477	9.75e-18
C23H18orf32	-11.147	4.16e-19
PRIM2	-11.146	6.25e-20
DIMT1	-11.1449	1.82e-19
PTMA	-11.144	1.01e-267
BRD9	-11.143	4.33e-46
CFLAR	-11.1394	1.94e-59
DCAF16	-11.1388	3.14e-19
SIRT2	-11.1376	6.97e-66
LOC122436505	-11.136	1.1e-18
BBC3	-11.1292	7.28e-20
UPRT	-11.1267	1.04e-19
METTL14	-11.1225	9.43e-20
FGD6	-11.1169	1.09e-18
UFSP2	-11.1095	2.14e-19
PDE4D	-11.1062	1.62e-19
LOC122424054	-11.1041	8.17e-24
TSSC4	-11.1029	1.13e-19
TFAM	-11.1016	2.78e-18
C18H19orf54	-11.1006	2.3e-25
NME3	-11.0976	1.91e-19
RALGAPA1	-11.095	4.94e-19
PIGN	-11.0939	6.03e-19
LOC122420605	-11.0936	4.64e-19
FAM241A	-11.0895	5.72e-18
TFB1M	-11.0874	2.46e-19
RSRC1	-11.0836	1.58e-19
MFGE8	-11.0835	3.84e-19
SCUBE1	-11.0756	9.96e-19
BLOC1S1	-11.0731	2.61e-19
CMTR2	-11.0724	2.19e-17
TAF4B	-11.0715	3.77e-19
TMEM63B	-11.0706	4.04e-19
RNF5	-11.0661	1.96e-33
ASCC3	-11.0623	2.18e-19
LRP6	-11.0578	5.94e-19
ANKZF1	-11.0499	1.79e-25
TCEAL4	-11.0495	1.07e-19
PLA2G12A	-11.0451	2.72e-19
MYOM1	-11.045	3.66e-19
CRYZL1	-11.037	1.29e-19
POLR2J	-11.0349	9.96e-25
ABCB7	-11.0332	9.18e-20
CLASP2	-11.0322	4.84e-24
BRAT1	-11.0248	6.67e-19
ANKRA2	-11.0222	1.37e-17
LOC122424353	-11.02	4.83e-19
NCAPG	-11.0195	1.53e-19
GPR27	-11.0182	1.77e-19
IFT57	-11.0133	1.35e-19
SLC25A26	-11.0113	1.84e-19
ARHGAP24	-11.0095	2.96e-19
HCFC2	-11.0094	2.58e-19
LOC122421285	-11.004	1.45e-18
RNF213	-11.0025	1.18e-84
TXNL4A	-10.9994	2.45e-19
TSPAN13	-10.993	4.9e-19
NOL12	-10.9927	2.88e-24
CDH13	-10.9926	1.85e-07
RHOA	-10.9924	1.46e-74
ENPP4	-10.986	1.63e-18
AASDH	-10.9827	5.1e-18
SLC33A1	-10.9817	4.18e-18
LOC122426653	-10.9816	1.93e-19
CHM	-10.9799	2.67e-18
LOC122423369	-10.9702	1.33e-42
CCNQ	-10.9646	3.39e-19
SS18	-10.9628	1.62e-23
MRPS30	-10.9617	1.92e-19
POLR1H	-10.9588	8.41e-25
SEPSECS	-10.9582	6.19e-18
CCDC91	-10.9568	1.26e-18
QPCTL	-10.9551	5.21e-19
LOC122432124	-10.9539	3.28e-19
NEMP2	-10.9533	1.92e-18
LOC122422743	-10.9514	2.14e-19
ZNF200	-10.95	2.81e-18
ATP7A	-10.95	2.43e-16
SIRT5	-10.9459	1.96e-19
RASA4B	-10.9451	1.98e-18
ANAPC4	-10.9447	1.19e-18
LOC122421104	-10.9437	1.05e-18
PBXIP1	-10.94	2.62e-131
OGFOD2	-10.9299	6.4e-19
LOC122430536	-10.9296	1.74e-165
LOC122433028	-10.9277	6.25e-19
ADGRG5	-10.9225	1.21e-23
PTH1R	-10.9179	5.09e-66
TALDO1	-10.9172	2.27e-211
DENND6A	-10.9116	1.2e-17
SMAD7	-10.9064	3.06e-19
RCHY1	-10.9059	4.88e-18
MRPL39	-10.9016	5.85e-18
RTCA	-10.9008	1.86e-18
TMEM150B	-10.8981	1.95e-18
SUB1	-10.897	1.98e-15
NRG1	-10.8951	1.52e-15
BCLAF3	-10.8934	8.06e-17
LOC122432749	-10.8917	2.02e-24
ZNF428	-10.8901	3.83e-18
FAM234B	-10.8893	7.73e-34
MAP3K20	-10.8832	1.66e-18
LOC122432320	-10.8827	1.69e-17
NKRF	-10.8768	6.34e-19
HSPA13	-10.8743	9.74e-16
GLG1	-10.8712	2.46e-61
MDM1	-10.871	3.86e-17
MTHFSD	-10.8675	7.07e-19
PPIL1	-10.8582	8.34e-36
CCDC167	-10.8569	7.3e-19
ARPC1A	-10.8546	1.1e-24
PTP4A1	-10.8543	4.44e-18
KIF27	-10.8457	1.83e-18
TBC1D25	-10.844	6.43e-18
LOC122425091	-10.8407	2.59e-18
ERGIC2	-10.8386	7.2e-18
ADAL	-10.8339	4.53e-19
PPAT	-10.8316	2.44e-17
ABCC10	-10.8307	7.96e-19
FAM234A	-10.8292	1.4e-23
SPAG7	-10.8256	2.85e-45
SLC52A2	-10.8255	4.17e-24
SLC38A2	-10.8172	3.14e-40
KIF13A	-10.8158	1.05e-18
LOC122455194	-10.8137	1.75e-19
CEBPA	-10.8133	1.73e-37
SMARCAD1	-10.8084	6.76e-17
POLG	-10.808	6.7e-52
PIGV	-10.8043	1.65e-18
CD99L2	-10.8027	1.11e-18
XK	-10.7985	2.02e-18
SLC41A2	-10.7908	2e-17
RTL5	-10.7786	4.78e-18
TTC21B	-10.7773	1.78e-18
CCDC86	-10.7749	3.07e-23
MCCC2	-10.7744	7.81e-19
ABHD14B	-10.7693	4.12e-18
LOC122429209	-10.7682	1.85e-16
FBXL4	-10.7653	1.17e-18
LOC122425345	-10.7582	3.55e-24
CYSLTR1	-10.7576	3.61e-17
LOC122433528	-10.7532	1.37e-18
DIAPH2	-10.7527	7.27e-18
LOC122429576	-10.7499	1.14e-17
TRPV2	-10.7455	4.37e-50
NUP107	-10.7447	1.43e-23
PLCB2	-10.744	5.09e-67
ZNF835	-10.7421	1.08e-17
LOC122426519	-10.7414	1.35e-18
PTCD2	-10.7391	1.37e-18
PISD	-10.7323	1.98e-43
NGDN	-10.7313	5.57e-18
SLC66A3	-10.7311	4.05e-23
TRMT10C	-10.7305	2.36e-18
UBFD1	-10.7293	1.63e-18
ARMC2	-10.7292	4.82e-18
LOC122420636	-10.7264	1.54e-17
BAG5	-10.7253	2.32e-52
CCNC	-10.7241	7.06e-17
SLC25A32	-10.7229	6.86e-18
SLC9A3R1	-10.7213	1.85e-125
HGFAC	-10.7192	1.36e-18
MRPS35	-10.7171	5.31e-18
SKA2	-10.7166	2.22e-18
BCL7B	-10.7151	1.22e-31
LOC122435836	-10.7132	5.65e-24
PACC1	-10.7113	1.17e-18
ISCA1	-10.7035	1.01e-44
GSK3A	-10.6994	2.34e-94
EIF4EBP1	-10.6978	2.01e-48
GTSE1	-10.6977	2.67e-18
LOC122429978	-10.6973	9.15e-17
ALCAM	-10.6959	3.34e-16
NPRL3	-10.6903	3.41e-29
LYRM4	-10.6897	1.58e-18
NUP35	-10.6887	4.41e-18
SLC13A3	-10.6875	2.51e-18
NFE2L1	-10.6849	2.49e-47
RTN4IP1	-10.6834	2.26e-18
FRS2	-10.6823	4.12e-17
ENOPH1	-10.6823	1.8e-23
SQLE	-10.6811	1.92e-23
SLC7A7	-10.6791	2.92e-74
SYNE3	-10.6767	1.61e-58
VSIG10	-10.6721	1.96e-18
USP7	-10.6684	1.15e-123
MRPL23	-10.6464	2.96e-18
AMFR	-10.6452	1.32e-80
COQ10B	-10.6433	4.5e-16
GNB2	-10.643	1.93e-154
THRAP3	-10.6421	7.41e-115
TRPS1	-10.6413	5.52e-23
XPO7	-10.6404	2.06e-69
SKP1	-10.6326	1.16e-70
INTS5	-10.6287	4.94e-22
C21H12orf4	-10.6222	1.93e-18
NUP50	-10.6179	4.07e-79
LOC122454618	-10.6175	3.89e-18
LOC122432636	-10.6136	4.95e-18
SLX9	-10.6117	3.65e-18
ANKRD29	-10.6115	1.57e-17
LOC122426596	-10.6073	6.95e-18
TREM2	-10.6068	5.74e-18
SERPINE1	-10.6055	6.22e-23
FCAR	-10.6041	1.39e-17
SLC19A1	-10.5935	1.28e-17
CKS2	-10.5898	8.65e-18
LOC122425079	-10.5873	7.97e-18
MRPL21	-10.5828	1.51e-17
ZNF703	-10.5793	2.91e-17
RPAP3	-10.5777	4.46e-16
ZNF470	-10.5728	6.42e-18
PJA1	-10.5725	1.01e-17
GPR4	-10.566	1.33e-21
TWSG1	-10.5651	3.15e-16
DENND5B	-10.5594	6.3e-17
BICRAL	-10.5592	2.95e-44
FSD2	-10.5582	5.63e-18
RPL13A	-10.5574	1.28e-95
NR2F6	-10.5537	1.53e-17
LCMT2	-10.552	1.54e-17
ZBTB40	-10.5445	3.83e-42
GLRX5	-10.5404	1.16e-22
UBR1	-10.5389	2.83e-17
BNIP1	-10.5373	7.62e-18
ADAT1	-10.5349	9.31e-18
ACTB	-10.528	5.03e-287
CHMP5	-10.5271	4.75e-21
GOLT1B	-10.5265	2e-16
THAP12	-10.5259	1.09e-16
MAF	-10.5227	2.28e-22
TRAPPC2	-10.522	2.34e-17
LOC122420281	-10.5197	6.37e-18
LONRF1	-10.5149	1.18e-17
MTM1	-10.5135	3.14e-17
DHRS9	-10.5126	8.98e-71
TOMM70	-10.5072	1.28e-37
KIF4A	-10.5054	7.83e-18
PHLPP1	-10.5054	1.19e-17
TRMU	-10.5008	1.46e-17
LOC122422254	-10.4996	1.38e-17
HDAC8	-10.4932	7.87e-18
BMX	-10.4923	5.87e-16
LOC122431671	-10.4903	6.23e-18
PLCL1	-10.4885	3e-17
TMEM42	-10.4877	1.71e-17
NOC2L	-10.4875	4.23e-22
GINS4	-10.4873	2.06e-17
CMSS1	-10.4868	2.1e-17
ADM2	-10.4848	1e-19
PROC	-10.4793	5.08e-17
INF2	-10.4792	1.09e-90
RSL1D1	-10.4791	2.15e-42
PTP4A2	-10.4788	2.86e-230
PLEKHA5	-10.478	4.53e-17
PIGB	-10.4776	9.91e-17
DCUN1D3	-10.4771	2.48e-23
TGFB1I1	-10.4702	5.43e-17
PHB2	-10.4693	4.31e-50
LOC122420590	-10.4667	8.59e-16
USB1	-10.4653	2.96e-23
NOTCH1	-10.4646	6.8e-63
NUP153	-10.4601	4.3e-76
MANEA	-10.4592	4.41e-15
LITAF	-10.4588	1.56e-141
ZNF184	-10.457	1.44e-16
RARS2	-10.4568	1.88e-17
PRICKLE1	-10.4531	4.37e-17
STAP1	-10.4531	1.38e-17
SPOCK1	-10.4473	1.42e-16
COPS7A	-10.446	1.09e-42
IRF3	-10.4431	5.76e-77
LOC122420260	-10.44	3.97e-199
DHODH	-10.4335	2.37e-17
TCEAL8	-10.4304	3.58e-17
LOC122434382	-10.4287	4.58e-10
CEP162	-10.4279	1.74e-16
BHLHA15	-10.4262	1.27e-16
TFRC	-10.4252	4.28e-19
CLPTM1	-10.4249	2.23e-72
MPI	-10.4233	6.76e-17
MCUB	-10.4213	6e-17
AQP3	-10.4197	4.03e-31
R3HCC1	-10.4183	2.17e-22
LOC122425174	-10.4181	7.27e-22
CCDC77	-10.4152	2e-17
ETNK1	-10.4135	4.71e-18
LOC122428087	-10.4122	1.36e-16
LIN54	-10.4118	1.28e-16
SRSF4	-10.4116	1.05e-62
LOC122429726	-10.4112	5.36e-112
KCNQ5	-10.4106	4.53e-40
EPB41L3	-10.4089	1.36e-39
CETN2	-10.4088	1.01e-22
CEP85L	-10.3995	1.76e-15
HYPK	-10.3977	1.49e-39
DCAF17	-10.3967	2.59e-16
LOC122436024	-10.3929	1.56e-17
BAG2	-10.3929	1.41e-16
LOC122421411	-10.3922	1.02e-15
NCOA7	-10.3918	4.2e-21
LOC122421506	-10.389	5.53e-17
MS4A8	-10.3761	1.25e-253
GMNN	-10.3711	4.13e-16
CLEC3B	-10.3669	7.49e-17
MYH11	-10.3598	2.23e-16
RPF2	-10.3598	2.38e-16
LOC122420178	-10.3536	1.23e-09
DONSON	-10.3534	9.73e-17
SLC49A4	-10.3531	3.03e-21
KCTD1	-10.3522	4.46e-17
IER3	-10.3519	5.24e-17
FANCF	-10.3511	2.72e-17
LOC122434496	-10.3447	3.41e-15
SPIRE1	-10.3374	2.05e-17
RAB12	-10.3366	5.47e-16
C16H5orf22	-10.3354	1.53e-16
SMAD3	-10.3317	5.34e-56
USP20	-10.3293	9.04e-59
FASTKD1	-10.3292	3.33e-16
PAX8	-10.3277	8.81e-16
SLC18B1	-10.3274	1.73e-16
LOC122435265	-10.3271	5.28e-17
L3MBTL3	-10.3267	1.17e-22
SPTSSA	-10.3167	7.01e-16
SORBS1	-10.316	5.92e-17
LRRK1	-10.3098	4.28e-22
NLGN2	-10.3055	1.1e-16
LOC122422727	-10.3009	2.84e-38
SNX4	-10.2987	6.74e-16
PPFIA4	-10.2982	1.5e-16
SDC3	-10.2959	6.72e-17
AFF2	-10.293	1.12e-16
TRIO	-10.2913	2.73e-22
SLC30A4	-10.2896	7.01e-16
TMEM186	-10.2889	3.54e-17
STAT1	-10.2882	2.41e-168
LOC122455140	-10.2841	7.5e-16
LOC122424911	-10.2772	4.3e-17
TMEM256	-10.2734	7.41e-16
ZNF134	-10.2733	6.52e-22
KICS2	-10.2726	7.22e-17
SP3	-10.2722	2.24e-39
MIER3	-10.2706	1.16e-14
GLYCTK	-10.2659	2.78e-16
ZC4H2	-10.263	3.75e-17
CTSC	-10.2541	3.42e-113
TMEM109	-10.2484	1.08e-65
IRAK3	-10.2461	3.54e-16
SRD5A1	-10.246	6.71e-17
AP1AR	-10.2397	5.71e-15
SEPTIN11	-10.2373	4.39e-95
TRAPPC13	-10.2373	2.65e-15
LOC122424021	-10.2369	4.6e-27
CDYL2	-10.234	4.76e-22
LOC122424310	-10.2334	2.56e-16
PAIP1	-10.2319	2.37e-21
LNPK	-10.2306	3.31e-16
FABP3	-10.2286	1.98e-16
STT3A	-10.2172	4.32e-91
MON2	-10.2152	1.08e-33
PGM3	-10.2148	2.97e-16
BTN1A1	-10.2138	7.99e-17
LOC122421667	-10.2125	7.87e-16
CITED2	-10.2061	5.92e-73
LOC122433931	-10.2059	9.02e-35
RWDD1	-10.2052	2.1e-16
UXT	-10.2044	1.66e-16
CLEC1A	-10.2021	1.29e-15
EME2	-10.1968	4.52e-16
GFM2	-10.1966	8.02e-17
NPHP1	-10.1962	7.37e-17
TRAPPC8	-10.1946	3.99e-30
TMA16	-10.1944	9.37e-17
PADI2	-10.1938	2.04e-16
IL10RB	-10.1921	2.25e-123
KLHL42	-10.1906	2.98e-16
MCM3	-10.1896	1.34e-51
SLC2A3	-10.1862	2.42e-164
AKAIN1	-10.1857	2.15e-16
CMC1	-10.1847	7.62e-17
UMPS	-10.1839	2.31e-37
LOC122421102	-10.1831	3.31e-21
KDM8	-10.1817	9.97e-17
LOC122428908	-10.1816	1.33e-16
PI4K2B	-10.1788	1.33e-14
CPLANE1	-10.1788	7.1e-17
TM4SF5	-10.1764	3.84e-16
TST	-10.1738	1.12e-33
CHPF	-10.1737	2.13e-15
PMM1	-10.1694	1e-16
LOC122421106	-10.1674	3.12e-16
XYLT1	-10.1631	6.51e-76
LOC122431444	-10.1629	6.94e-17
LOC122431514	-10.1602	3.41e-16
PDCD1	-10.155	1.28e-15
ZFTA	-10.1544	1.45e-16
ZNF821	-10.1523	8.65e-17
ERCC3	-10.1521	1.39e-52
BCKDK	-10.1513	6.1e-37
ACAA1	-10.1489	1.13e-56
NUDT3	-10.1373	4.92e-83
EEFSEC	-10.1347	9.03e-20
GPN2	-10.134	9.91e-17
PRMT3	-10.132	2.66e-15
ZDHHC4	-10.1319	2.58e-16
LOC122421594	-10.1304	4.58e-16
TMTC2	-10.1261	5.29e-15
ANKRD54	-10.1258	2.92e-29
ARHGEF1	-10.1234	5.38e-230
LOC122420609	-10.1231	3.27e-16
MSR1	-10.122	9.77e-15
METTL8	-10.1215	2.26e-16
KDM1A	-10.1201	1.76e-52
ZBTB2	-10.1199	1.81e-21
RGS1	-10.119	3.86e-16
IPO8	-10.1161	6.95e-36
HSPB6	-10.1145	1.75e-14
METTL22	-10.1102	2.53e-16
TBRG4	-10.1073	2.35e-29
CSNK2B	-10.1063	5.16e-95
LOC122420554	-10.1051	1.74e-15
MLKL	-10.1022	1.37e-30
SKP2	-10.0984	3.01e-16
TTF1	-10.0952	6.11e-38
TRAPPC6B	-10.0951	3.73e-14
FBXO30	-10.0945	1.87e-18
TOMM34	-10.0906	1.98e-21
TMEM218	-10.0882	1.19e-16
WDR33	-10.0881	4.13e-92
CHIC1	-10.0875	9.43e-15
POC1B	-10.0836	3.66e-16
SMARCD1	-10.0824	4.76e-77
LOC122428344	-10.0774	7.38e-16
HNRNPUL2	-10.0742	8.82e-133
WRAP53	-10.0721	9.23e-21
LOC122421324	-10.0704	1.85e-15
LOC122435267	-10.0691	3.94e-09
LOC122435941	-10.0608	1.88e-16
TMEM62	-10.0588	2.23e-16
GNPDA2	-10.0463	1.09e-14
TMEM245	-10.046	4.67e-15
LOC122455298	-10.0437	5.2e-14
LOC122436233	-10.0433	3.28e-15
PIK3AP1	-10.0416	6.33e-146
PPEF1	-10.0383	9.27e-16
TMC6	-10.0382	5.56e-115
OTOG	-10.0381	2.83e-15
BEX4	-10.038	5.92e-16
KBTBD8	-10.0359	7.77e-14
ZSWIM9	-10.0358	5.1e-15
PYROXD1	-10.0289	4.12e-15
TRMT11	-10.0276	1.79e-15
ARMT1	-10.0276	6.68e-14
MRPS25	-10.0264	3.78e-21
TM6SF1	-10.0263	4.76e-21
NGLY1	-10.0237	4.04e-47
MIA	-10.0205	2.5e-16
RGMB	-10.0193	3.9e-16
ERI1	-10.0193	1.02e-15
LOC122422152	-10.0193	1.6e-15
LOC122420030	-10.0189	9.96e-16
CEP290	-10.0185	1.16e-14
REPIN1	-10.0069	5.46e-16
LOC122426018	-10.0013	4.03e-16
TMF1	-10.0003	1.99e-18
PHF21B	-10.0002	4.35e-14
FOXO3	-9.9962	1.41e-91
RMND1	-9.9955	2.65e-16
LOC122454314	-9.99296	5.65e-16
LOC122429783	-9.99114	9.84e-16
NEXN	-9.98398	6.51e-09
REM2	-9.9817	7.18e-21
SPTAN1	-9.981	1.48e-67
TREML2	-9.98058	4.95e-103
RIOX2	-9.98042	4.89e-16
GUF1	-9.97869	3.25e-14
VEZF1	-9.97677	1.63e-55
NOB1	-9.97643	6.13e-39
DDIAS	-9.97414	1.25e-15
ZNF132	-9.97089	4.68e-16
SNURF	-9.97033	3.7e-15
E2F4	-9.96951	5.99e-53
SNAP23	-9.96577	5.49e-43
SAMD8	-9.96551	1.26e-13
RUVBL1	-9.96525	4.14e-49
LOC122425619	-9.96208	7.43e-16
LOC122425377	-9.95659	6.51e-16
CCNK	-9.95403	4.05e-20
FXYD5	-9.95118	2.15e-210
PRADC1	-9.94883	8.67e-16
SAMD3	-9.94826	1.92e-15
LOC122420196	-9.94726	1.83e-107
MAGEE2	-9.94647	3.98e-16
POU2F2	-9.94016	3.72e-96
LOC122433290	-9.93838	6.62e-15
PTGDR	-9.93604	4.42e-14
MEX3C	-9.92926	7.52e-19
DNAJC10	-9.92785	7.99e-33
LOC122422338	-9.92552	6.58e-16
FADD	-9.92494	7.63e-45
CCP110	-9.92429	1.3e-14
ADSS1	-9.90813	6.29e-16
ZNF449	-9.90659	2.76e-15
WDR70	-9.90414	5.91e-36
DCPS	-9.89896	3.91e-29
LOC122421048	-9.89823	4.4e-15
MARCHF9	-9.89572	1.51e-15
HSPB1	-9.89316	5.65e-113
LOC122420038	-9.8915	3.05e-15
ETFB	-9.88696	8.32e-86
RPS19	-9.88654	2.59e-73
EXOC2	-9.88456	2.14e-56
MYB	-9.88115	2e-15
UBE2E3	-9.88054	2.02e-20
LOC122424492	-9.87916	3.93e-35
TRIM3	-9.87696	4.1e-15
SLC4A7	-9.87221	1.44e-18
CHKA	-9.87198	1.39e-20
TMEM138	-9.86974	8.53e-16
RIDA	-9.86969	3.83e-30
CNR2	-9.86902	4.74e-63
AMD1	-9.86859	8.22e-67
RP9	-9.86801	1.14e-15
ZNF789	-9.86734	3.08e-15
LOC122420166	-9.86002	4.85e-14
SETD3	-9.8564	1.26e-61
RBPMS	-9.85301	1.45e-34
TMEM216	-9.85297	8.29e-16
LOC122426405	-9.83662	9.63e-14
RHAG	-9.83136	3.73e-13
LOC122430089	-9.83077	3.02e-14
CUL7	-9.82737	1.92e-93
MARS2	-9.82662	1.26e-15
TMEM128	-9.82618	2.93e-09
LOC122428190	-9.82594	3.9e-08
ABHD14A	-9.82535	1.42e-15
LOC122432588	-9.82177	1.13e-15
SDR42E1	-9.81476	2.22e-15
NXN	-9.80974	4.33e-19
LOC122455028	-9.80433	2.28e-20
PDLIM5	-9.80351	3.98e-14
MFHAS1	-9.8034	4.78e-20
RYR1	-9.79599	8.78e-19
CEBPG	-9.79539	1.12e-26
SPATA24	-9.79424	2e-15
OTUB2	-9.79371	4.51e-15
LOC122455236	-9.78874	2.23e-20
BACH1	-9.78861	3.23e-67
PHKA1	-9.7813	5.15e-29
LOC122423211	-9.78047	4.28e-15
ARHGAP5	-9.77428	1.47e-13
C23H18orf54	-9.77279	3.37e-13
ZNF182	-9.76518	4.09e-15
CBX5	-9.76453	3.47e-115
APOOL	-9.76406	1.21e-13
DPP3	-9.75937	5.71e-58
UTP20	-9.75715	3.38e-29
P2RX7	-9.75181	1.85e-19
C23H18orf21	-9.74851	1.41e-14
RWDD2A	-9.74848	3.31e-15
ERC1	-9.74706	8.27e-43
OXSM	-9.74504	1.94e-15
BIN3	-9.74396	9.38e-36
IQCE	-9.74036	3.54e-15
IFNAR2	-9.73951	NA
IRF2BP1	-9.73948	2.08e-42
ZFP2	-9.73686	1.11e-14
TEX30	-9.73346	3.01e-12
PAQR7	-9.7321	2.11e-15
LOC122421157	-9.73156	2.46e-19
SAP25	-9.72282	1.34e-33
UGCG	-9.71676	2.82e-44
HSF2	-9.71372	8.64e-15
VNN1	-9.71187	3.54e-15
SLC35D2	-9.70953	8.77e-20
SUPT3H	-9.70703	3.85e-15
VSIG10L	-9.70515	1.52e-14
SLC22A31	-9.70514	3.06e-15
ATP5MC3	-9.70465	2.93e-47
OPCML	-9.70171	1.31e-13
SLC14A1	-9.70145	5.07e-14
PPP1R3D	-9.69539	2.4e-37
SDS	-9.69445	3.73e-199
TNFRSF11A	-9.694	5.22e-15
NCR1	-9.68421	1.15e-14
BCAT2	-9.68209	1.48e-33
PNPLA6	-9.681	6.73e-89
ODAD1	-9.681	2.66e-14
AMOT	-9.68043	2.56e-15
CCDC66	-9.67851	7.2e-14
H1-2	-9.66801	3.4e-195
LOC122425073	-9.66786	3.79e-15
LOC122423495	-9.6644	5.24e-14
BTBD11	-9.66323	5.97e-19
CHMP7	-9.66151	9.69e-51
VKORC1L1	-9.66129	1.27e-18
BOD1	-9.65913	4.03e-15
NHLRC1	-9.65896	5.36e-15
SERF2	-9.65868	1.37e-154
PSMD10	-9.65276	4.35e-14
SPG7	-9.65274	3.39e-77
SLC43A2	-9.65218	2.03e-108
DUSP22	-9.65042	5.2e-15
CIITA	-9.64801	4.08e-73
SLC25A14	-9.64766	1.31e-14
IRF8	-9.64415	1.24e-83
RTRAF	-9.64257	2.65e-34
COPZ1	-9.6425	3.84e-80
ODR4	-9.64013	6.62e-14
RBX1	-9.63951	1.39e-81
LOC122431993	-9.6395	1.91e-14
INTS1	-9.63921	1.74e-40
PSMB10	-9.63015	3.37e-91
OLFM4	-9.62641	9.38e-14
LOC122420046	-9.62518	5.2e-15
DCTD	-9.62439	3.41e-14
MOSPD2	-9.61258	1.88e-13
LOC122429577	-9.6107	3.03e-28
GEMIN2	-9.60999	1.88e-13
LOC122430561	-9.60992	6.52e-15
UBR2	-9.60966	8.07e-90
TMEM242	-9.60752	1.81e-14
NR4A2	-9.60355	2.07e-13
GPR55	-9.59881	1.3e-14
LOC122427285	-9.598	1.34e-13
TUBB6	-9.59599	1.19e-13
LOC122454266	-9.59544	3.57e-14
PSMC4	-9.58784	3.19e-94
TTPAL	-9.58708	6.98e-15
EIF4H	-9.58536	2.54e-173
LOC122435295	-9.58327	8.71e-15
NOTCH4	-9.57913	5.6e-15
PAWR	-9.57885	1.19e-13
MAP3K2	-9.57799	3.85e-28
RPL11	-9.57677	1.48e-51
LOC122427243	-9.57504	3.24e-13
MED28	-9.57248	5.97e-94
LARP7	-9.56877	1.27e-45
TRPM4	-9.56874	3.77e-14
CCDC125	-9.56866	7.87e-14
LOC122435446	-9.56611	1.48e-14
C23H18orf25	-9.56273	2.07e-34
LOC122433335	-9.55869	9.03e-15
CTLA4	-9.55649	1.4e-14
USP47	-9.5561	5.82e-48
SLC6A8	-9.55531	8.66e-15
LOC122422296	-9.5504	1.84e-14
LOC122424039	-9.55003	1.46e-14
SCN3A	-9.54705	7.32e-14
MBD6	-9.54694	2.45e-72
SAMHD1	-9.54417	6.92e-220
LOC122427712	-9.54394	1.29e-14
GRAP2	-9.54171	5.41e-121
ARSH	-9.54148	3.32e-14
STRADA	-9.5395	1.99e-56
ATP2A1	-9.52915	2.73e-13
MUL1	-9.52827	2.48e-51
C31H4orf47	-9.51997	2.3e-14
GPSM3	-9.51701	2.5e-119
RDH5	-9.51539	8.69e-15
FBXO4	-9.5115	9.34e-14
SCNM1	-9.51091	1.71e-34
P2RY4	-9.50831	1.38e-14
LOC122434556	-9.50566	2.22e-14
GATA2	-9.49907	1.78e-12
RELT	-9.49313	3.44e-44
LOC122423086	-9.49263	1.52e-14
LOC122430098	-9.49242	4.01e-14
AGFG1	-9.492	1.91e-74
LANCL3	-9.49183	1.16e-13
C1QB	-9.49067	4.96e-13
SYTL4	-9.48838	1.08e-14
P2RX4	-9.48513	3.86e-36
ITGAM	-9.48401	4.78e-117
C21H12orf73	-9.48348	1.12e-14
OTUD1	-9.48265	2.98e-14
PANK3	-9.48132	9.66e-13
SPINT1	-9.47945	6.03e-14
SMCR8	-9.47564	2.78e-49
AP1S3	-9.47327	1.12e-13
PROKR1	-9.47296	9.12e-14
SEL1L3	-9.46926	4.98e-65
MTRES1	-9.46821	1.22e-14
HP1BP3	-9.46638	2.7e-145
CCNE1	-9.46629	1.33e-14
AKT1S1	-9.4658	1.07e-18
DCBLD1	-9.46024	3.34e-14
ZCCHC4	-9.45704	2.51e-14
MITF	-9.45346	2.18e-16
TSPAN6	-9.45149	1.12e-13
CASK	-9.44801	5.94e-14
PNMA1	-9.44659	3.09e-14
LOC122420614	-9.43943	1.56e-13
CPLANE2	-9.43894	1.69e-14
RSPH3	-9.42452	1.87e-18
GAS8	-9.42431	1.86e-14
CTSW	-9.41982	1.61e-60
LOC122426419	-9.41827	4.3e-89
SLC25A27	-9.41441	2.57e-13
CDPF1	-9.41343	3.57e-26
YIPF6	-9.4129	1.91e-24
SLC36A4	-9.41083	2.11e-12
FBXO33	-9.40797	5.11e-40
USP53	-9.40652	9.94e-13
ARRDC4	-9.40337	5.22e-92
CACNB4	-9.39835	1.92e-12
DPF2	-9.39814	2.18e-87
AKNA	-9.39034	8.9e-107
LOC122423311	-9.38781	6.48e-14
TTC33	-9.38738	4.27e-16
SUSD6	-9.38644	1.47e-99
WDR76	-9.38421	1.9e-25
WASHC5	-9.38354	4.43e-58
LOC122428192	-9.37853	5.2e-13
SUMF2	-9.37785	1.31e-18
SIVA1	-9.37758	2.53e-14
LOC122433255	-9.37563	4.55e-41
SLC25A6	-9.37113	NA
BYSL	-9.36961	6.47e-33
LOC122430609	-9.36841	5.65e-14
PLCXD1	-9.36803	7.06e-14
LOC122420256	-9.36781	2.24e-91
LOC122430747	-9.36673	3.46e-14
ZNF292	-9.36612	6.72e-36
LOC122420627	-9.36601	2.11e-13
JPT2	-9.36367	1.11e-91
TMEM267	-9.35862	7.58e-13
SUSD3	-9.35827	2.32e-93
KATNB1	-9.35672	1.36e-45
ISG20	-9.35615	5.93e-116
LOC122435009	-9.35375	2.59e-14
SOD1	-9.34699	5.63e-99
ASRGL1	-9.34554	2.16e-164
SHC1	-9.34413	1.81e-122
RPL39	-9.34375	1.5e-07
RHCE	-9.33555	7.88e-12
SLC39A9	-9.33319	3.31e-82
RPL29	-9.33218	2.65e-113
FBXO22	-9.33113	1.66e-18
ZSCAN26	-9.32799	2.61e-13
CAMK2N1	-9.32402	1.43e-13
LOC122420279	-9.32167	7.98e-31
TCP11	-9.31989	1.6e-13
CRYBG2	-9.31939	5.37e-34
HELB	-9.31571	3.12e-13
LOC122420586	-9.31273	5.74e-12
SETBP1	-9.31054	5.79e-14
HSPG2	-9.31029	6.89e-14
ZNF580	-9.31021	8.38e-14
SLC29A1	-9.31019	4.8e-50
CENPQ	-9.30851	9.66e-18
ITPR2	-9.30774	1.16e-50
PDE3A	-9.30773	9.88e-14
SLC9A8	-9.30729	1.82e-76
FAM199X	-9.30124	4.31e-13
MTFR2	-9.30047	9.33e-14
TAB2	-9.29931	4.53e-71
ZNRF1	-9.29907	4.57e-91
TMEM87A	-9.29506	3.9e-65
PTBP3	-9.29094	1.68e-86
UBAP2L	-9.28757	2.49e-102
MMS22L	-9.28562	1.34e-13
NCKIPSD	-9.28342	2.16e-13
SOAT1	-9.28102	9.57e-16
PMS1	-9.27931	1e-12
[truncated: 5,297 more rows]

## Sheet: upregulated
Supplementary Table S11 - Upregulated genes in Adults (D0xD14)
gene_id	log2fc	padj
MRPL20	0.358868	0.0450572
LOC122451379	0.366149	0.0440325
POLR1B	0.367267	0.0369503
TXNDC12	0.369316	0.0389286
GNPTG	0.370666	0.0243713
GADD45B	0.373767	0.0444046
ATP5MF	0.382259	0.0487416
PPP2CB	0.391512	0.0253058
THADA	0.399101	0.0484891
AHCY	0.409566	0.0268185
UTP6	0.410069	0.0219741
CBX8	0.411169	0.0493137
LOC122446364	0.421549	0.0475166
MDC1	0.431741	0.0457605
JMJD4	0.433649	0.0491065
LOC122449549	0.436422	0.0478467
DUT	0.439657	0.0405403
METTL17	0.441581	0.00710942
REV1	0.44513	0.0392691
SPHK1	0.449775	0.0353583
BLNK	0.449802	0.0073937
RAD51	0.454437	0.0495638
TMEM41A	0.456568	0.0448211
DERL2	0.461388	0.00710942
POLR1E	0.461684	0.0439116
DPH7	0.462724	0.0412972
FDPS	0.464194	0.043216
YWHAE	0.467808	0.0396881
DVL1	0.46781	0.0302021
BLVRA	0.469332	0.0105546
C11H11orf91	0.46966	0.0219151
DOT1L	0.469811	0.0353261
VAPA	0.471483	0.0371956
EBNA1BP2	0.472231	0.0340213
METTL25B	0.472554	0.0139922
ENTPD6	0.474783	0.0389759
HAUS4	0.474789	0.0119294
ATP5ME	0.474936	0.0439525
METRNL	0.476156	0.0279751
LOC122433412	0.477211	0.022872
VPS41	0.479065	0.0112533
ANKRD39	0.479279	0.039744
LMAN2L	0.480668	0.0471369
USP24	0.48474	0.0122537
ZC3H14	0.485374	0.0183659
LOC122445143	0.486808	0.0178701
XYLB	0.486933	0.0190943
LOC122438868	0.488308	0.0357958
CCDC191	0.490111	0.0348526
DNAJC1	0.491885	0.0162007
DHRS12	0.495245	0.020856
RSAD1	0.496037	0.0348251
CD300LF	0.499619	0.0146613
LOC122441822	0.501299	0.0226606
FCHSD1	0.502379	0.0259872
EMC6	0.503679	0.0140136
NAXD	0.504878	0.0356146
MFSD12	0.505148	0.0488443
ACTR1B	0.505409	0.0386506
CYREN	0.506897	0.0389982
CDK3	0.508801	0.0327756
CREB3	0.509893	0.02841
ALKBH3	0.512001	0.013905
POM121C	0.514832	0.043095
HSPA12B	0.517171	0.0477499
MRPL30	0.517213	0.0276484
ADPRS	0.520385	0.0277161
BPI	0.522336	0.0297366
IWS1	0.522416	0.00270496
EXOSC10	0.523871	0.0491073
FAAP20	0.524232	0.0134177
ATXN7L2	0.524903	0.0310726
LOC122443313	0.525513	0.0309504
DPH1	0.525623	0.0315409
DPAGT1	0.527374	0.0438982
DDB2	0.528131	0.0278331
AMZ2	0.528583	0.0129114
EIF2B4	0.529252	0.017328
PUS1	0.533721	0.0434625
LFNG	0.534144	0.0207168
RNF215	0.534537	0.0146787
KLHL26	0.534553	0.0342398
LOC122451787	0.535056	0.0407391
DGKZ	0.536053	0.0414683
ACBD6	0.536352	0.0100618
NUDT17	0.536754	0.0289739
MED19	0.536944	0.0293684
B3GNTL1	0.537033	0.0348674
MALSU1	0.537207	0.0262727
LOC122437302	0.540075	0.00888353
MRPL58	0.540897	0.0212219
MRPS15	0.541122	0.0415136
ARRDC5	0.543964	0.000976771
PSMA7	0.545391	0.0299827
PLAU	0.548941	0.0217977
PANX2	0.551122	0.0254231
SF3A3	0.552525	0.0454389
DHRS3	0.552944	0.0416724
HAX1	0.55364	0.0186759
MAST3	0.554062	0.0385182
HMGCL	0.556297	0.00439603
GMPPA	0.556786	0.0472205
MRPL10	0.557002	0.047419
MCOLN1	0.557894	0.0263912
MED27	0.558202	0.0158249
CDH24	0.558889	0.0455503
IRF9	0.559582	0.0178935
KXD1	0.559592	0.020773
COASY	0.561754	0.0423284
CIAPIN1	0.563937	0.0453798
MKS1	0.563956	0.0457694
LSM7	0.564417	0.0259229
RRM1	0.565741	0.0378535
NDUFS3	0.568059	0.0462681
PFDN6	0.568269	0.0393173
KCTD2	0.568491	0.0333436
LOC122430223	0.569747	0.00698388
NDUFA10	0.569997	0.0418339
CCDC69	0.570416	0.0351757
STRIP1	0.570809	0.0382381
LOC122419897	0.571288	0.0478841
ARRB2	0.572268	0.0433781
LOC122446054	0.573099	0.040659
SPR	0.574239	0.0282828
LOC122434165	0.574625	0.0389982
LOC122449756	0.575279	0.0440191
AKR1E2	0.575767	0.0401981
DENND1A	0.57599	0.0389911
LOC122440490	0.577393	0.0235796
XPR1	0.577469	0.028028
CRY2	0.577536	0.0455033
SETD1B	0.580465	0.00662337
SSBP4	0.581616	0.0109142
IFT46	0.58228	0.00733828
EPHX3	0.583897	0.03532
GGT7	0.584597	0.0153612
CTSZ	0.584776	0.0344938
AIFM1	0.585157	0.0442674
CUEDC1	0.58729	0.0189653
ASNS	0.587957	0.0211346
NDUFS2	0.588195	0.0189533
C2H1orf162	0.588988	0.00243304
C12H8orf82	0.589634	0.0172578
C10H20orf27	0.589773	0.0457284
PPP1R3E	0.590447	0.0420978
MRPS7	0.590558	0.00717479
ITGA10	0.591486	0.0134521
TAF4	0.591558	0.000906043
MAP2K6	0.592371	0.00413108
TOMM40L	0.59579	0.00838735
LOC122445800	0.595961	0.0392759
LOC122440531	0.597137	0.0404419
CASP1	0.598655	0.0324366
POLDIP2	0.599151	0.00417705
LOC122443181	0.599336	0.011726
IFI30	0.600598	0.0384414
DNASE2	0.600982	0.00778786
MROH1	0.601666	0.0416724
REXO4	0.603698	0.0353101
HECTD3	0.60432	0.0474992
LOC122440785	0.604886	0.0199224
LOC122439670	0.605689	0.0269912
HPS1	0.605899	0.0129658
NDUFB9	0.606371	0.0142008
NUP88	0.606482	0.000275991
LOC122439288	0.607088	0.00535508
DYNLRB1	0.607567	0.0370045
HECW2	0.609743	0.0495533
EVI5L	0.609965	0.0355258
KIF1C	0.610255	0.0463709
CEP295NL	0.610817	0.0454192
IL12RB1	0.610818	0.0228823
LOC122438520	0.611421	0.015929
COG1	0.612288	0.0148771
CYHR1	0.612978	0.0250897
APBB3	0.613367	0.00401881
MISP3	0.613599	0.040724
POLDIP3	0.613623	0.0418435
LOC122452302	0.613852	0.0471351
NDUFA13	0.614579	0.0463877
LZTR1	0.616433	0.0350645
BRD3	0.616437	0.0150216
GADD45GIP1	0.617376	0.048562
HPS6	0.617383	0.0288919
FDX2	0.617733	0.0397303
DHPS	0.6184	0.0451635
DUSP28	0.618509	0.0299924
AKAP5	0.618627	0.0469188
LOC122453084	0.619122	0.0221305
MAST2	0.619487	0.0385985
ZMYM3	0.619644	0.00316496
LOC122426729	0.620411	0.0476445
LOC122451743	0.62046	0.026466
IDH3B	0.621111	0.0215064
LOC122447162	0.621642	0.00688413
KCNT1	0.622008	0.0313611
MUTYH	0.622365	0.00793668
ANAPC15	0.623982	0.0233892
PDCD2	0.624342	0.00121687
YWHAG	0.625108	0.000450399
LRRC45	0.625575	0.0401926
DHX58	0.625753	0.0325373
LOC122445907	0.625899	0.00385272
BTBD2	0.625929	0.0495308
CDK5RAP3	0.629733	0.0267002
MYDGF	0.629818	0.0123948
SLC49A3	0.630823	0.0394774
LOC122444008	0.631998	0.0137623
STOML2	0.632251	0.00384579
GPATCH4	0.63264	0.00662278
LOC122440583	0.633531	0.0260542
LOC122443201	0.633692	0.00536015
DUS1L	0.634564	0.0390145
FBXL15	0.634684	0.0461255
C6H15orf62	0.634724	0.0295335
TCTN1	0.636444	0.0192714
ABHD1	0.63817	0.0068616
ABHD17A	0.63923	0.0465456
MMAB	0.640102	0.0146345
HDGFL2	0.640399	0.0377668
ZEB1	0.640748	2.73e-05
HPS4	0.641451	0.014797
LOC122453241	0.641625	0.0385822
COPRS	0.641843	0.00818847
CENATAC	0.642413	0.00234763
CD74	0.642911	0.0493138
MIEF2	0.643326	0.0469853
LOC122437619	0.643353	0.0270291
FAM174C	0.645736	0.0348693
TOMM6	0.646436	0.014122
LOC122442326	0.646859	0.0288934
CTNS	0.647134	0.0190157
ARSG	0.64746	0.0288224
FUOM	0.648758	0.0221876
MAP2K7	0.648859	0.0265837
LOC122420576	0.649556	0.0304597
LOC122421505	0.650767	0.00666333
LOC122451874	0.650986	0.0397838
AIF1	0.651725	0.0407736
LOC122437837	0.653864	0.0357836
ZNF282	0.655496	0.0359099
FPGS	0.655694	0.0390218
EBI3	0.656347	0.00869773
CSNK1G2	0.657376	0.0385891
MRPL27	0.658627	0.0354813
DPM2	0.658757	0.0189065
PEX5	0.659088	0.00700402
TMEM184C	0.6604	0.0181067
INTS11	0.661457	0.0206251
MICOS13	0.661592	0.0348674
SCAPER	0.662256	0.00153367
ALDOC	0.662265	0.0280067
LOC122448017	0.66304	0.00865771
CBR3	0.666128	0.0194217
FXYD1	0.667126	0.0249005
SMN2	0.667539	0.000782511
IQCD	0.668431	0.0244644
CHMP6	0.668595	0.0315657
LOC122448045	0.668617	0.0163704
AKR1A1	0.668849	0.0169314
AAR2	0.669241	0.0480096
LST1	0.669331	0.0129104
LOC122427322	0.669635	0.000989115
GHDC	0.670076	0.00156516
EDF1	0.670951	0.0281994
CCDC57	0.671725	0.015132
MRPL52	0.672196	0.0126837
COQ4	0.673459	0.0448363
LOC122442434	0.673487	0.0318212
FBF1	0.675542	0.0241525
CZIB	0.676215	0.00458596
SNRNP48	0.676545	0.000726031
LOC122430153	0.676847	0.00429936
ZCCHC9	0.677542	0.00172261
C1H17orf49	0.677816	0.032447
MRPL55	0.677884	0.0221183
C4H19orf53	0.678063	0.00994329
LPAR2	0.678889	0.0401803
MAPRE3	0.679354	0.0219531
PPP1R3F	0.67982	0.0387116
LOC122436915	0.680567	0.0216413
CDC45	0.680743	0.0223541
C4H1orf35	0.680844	0.00134419
DNLZ	0.681386	0.00524444
LOC122446248	0.681586	0.0439871
LOC122419753	0.681896	0.0159718
IBA57	0.681959	0.0465775
CLTB	0.684306	0.0277161
MCC	0.684439	0.0146613
DPCD	0.684547	0.0249526
EXOSC4	0.685236	0.0277136
LOC122451456	0.686237	0.0236598
MYBPC3	0.68637	0.0212219
FAM193B	0.686887	0.00504553
LOC122441498	0.687234	0.0435744
ARMC7	0.687416	0.0258072
MTX1	0.687706	0.0324138
HEXD	0.688307	0.00422325
ACOT8	0.688504	0.015197
C4H19orf25	0.688574	0.0231672
FARP2	0.688618	0.00580368
PPP4C	0.689198	0.0128256
DHRS7B	0.69014	0.0117975
LOC122442347	0.691747	0.0127597
LOC122448319	0.692211	0.0444704
ITPA	0.692325	0.0207653
NAPRT	0.692949	0.0273271
PIGS	0.693716	0.0124964
EMILIN1	0.693883	0.020159
NDRG2	0.694362	0.00313174
ABHD8	0.694573	0.0113842
KRI1	0.695111	0.0297613
VPS26C	0.69548	0.00500669
TBC1D17	0.698384	0.0133854
DUS3L	0.699201	0.0120962
B4GALT2	0.700385	0.049518
PITPNC1	0.703177	0.0131989
RPUSD3	0.703952	0.000343578
UBIAD1	0.704392	0.00101891
ATP5F1D	0.705205	0.0422394
MTFP1	0.705939	0.0416548
CFAP126	0.706583	0.0218285
EEF1D	0.706664	0.0292568
RAB42	0.707256	0.0143309
ARFRP1	0.707608	0.0129798
UROC1	0.708052	0.00732753
BRI3	0.708116	9.44e-05
ARRDC1	0.708858	0.00407941
CDK18	0.709947	0.0490668
MAP1S	0.71229	0.0120534
ATPAF2	0.712331	0.0170655
MVK	0.712805	0.00932853
LOC122440232	0.714415	0.0465315
LOC122430530	0.715041	0.0164942
LOC122433138	0.715643	0.000450913
ATP5MC1	0.71722	0.020857
DDX41	0.717307	0.0435545
ZRANB1	0.717828	0.00334595
ENGASE	0.717839	0.0155223
KLHL17	0.718071	0.00210066
CARS2	0.718132	0.0423432
VPS39	0.721559	0.00173453
CCDC163	0.724024	0.0360218
BBLN	0.724599	0.00278366
GRHPR	0.724833	0.00278266
ZFYVE27	0.725101	0.000290326
GUK1	0.725525	0.0112088
NDUFB7	0.725786	0.0236354
C1H12orf43	0.725889	0.0106549
HOMER3	0.726553	0.000405833
CABIN1	0.726968	0.0332709
LOC122440291	0.727319	0.0150693
SBDS	0.727544	0.029295
MTHFR	0.727662	0.00735685
LOC122433244	0.727705	0.0219991
GIPC3	0.727969	0.0300342
MRPL36	0.728233	0.0445502
CUEDC2	0.728931	0.0183174
COMTD1	0.729711	0.0487209
MRPL12	0.729946	0.0135299
ENO3	0.730008	0.0111888
ACBD4	0.730152	0.00730729
ARID5A	0.730986	0.0401732
MATK	0.732159	0.00800598
MBD3	0.73241	0.0474304
LOC122442515	0.732608	0.00322463
CAPG	0.732803	0.0230508
MVB12A	0.733018	0.0390539
NDUFS7	0.73327	0.0235231
FCHO1	0.733417	0.0238832
AUP1	0.733993	0.0065161
B4GALT7	0.733999	0.0107972
CEP43	0.734594	9.19e-05
DDX49	0.735194	0.0105566
LGALS1	0.735252	0.0276897
DMAP1	0.735755	0.0275458
MRPL54	0.735805	0.00751017
DBNDD2	0.735949	0.00603065
C11H11orf49	0.736201	0.0330188
HYI	0.737285	0.00234548
ACSF2	0.737472	0.0276754
NDUFV1	0.737574	0.0344686
SUV39H1	0.738371	0.00737846
LOC122435445	0.738802	0.00662801
POU2F1	0.739801	0.00018651
BEND5	0.73993	0.031724
TMEM120A	0.740246	0.0299924
EIF4EBP3	0.741012	0.00805627
AP2A1	0.741577	0.0123339
ESPN	0.742694	0.0126945
NCBP2AS2	0.743225	0.0191581
DRG2	0.743737	0.0123005
MRPL24	0.744316	0.00962715
GALK1	0.745672	0.0137163
RIPK2	0.745889	0.0191717
LOC122438738	0.746589	0.0442352
ADAMTS10	0.747496	0.0492586
ANAPC2	0.748099	0.0107297
FBXO44	0.748321	0.0229959
ASCC2	0.748713	0.0238088
CD320	0.749158	0.0226628
ZNF18	0.749324	0.0216811
SKA3	0.749462	0.000615231
GIPC1	0.749543	0.00248055
LOC122452418	0.750683	0.00292934
RNF26	0.750932	0.0266827
BORCS8	0.753118	0.00482096
TMEM81	0.753732	0.000715755
GAREM2	0.75421	0.0396793
CAPN10	0.754696	0.00295211
RHOB	0.755708	0.00103782
MORN4	0.756815	0.00289928
ABI3	0.757545	0.0227143
JMJD7	0.758028	0.00899917
LIMD2	0.758092	0.0170518
MINDY4	0.75928	0.0299923
CA9	0.760929	0.00789182
ABHD12	0.761445	0.0241097
LOC122437916	0.761611	0.0191037
CALY	0.762721	0.039397
MSRB2	0.762887	0.00495842
DNHD1	0.763255	0.0189887
IKBKE	0.763504	0.0028394
DNAJC17	0.763891	0.00130788
CST7	0.763976	0.0401774
IFI35	0.764226	0.00273718
PRKDC	0.764573	0.00847426
LOC122444325	0.764642	0.0367169
LOC122438914	0.766278	0.001355
CIZ1	0.766871	0.0228958
IGDCC3	0.767031	0.038877
LOC122448656	0.768047	0.000446588
CLEC4G	0.769074	0.00854034
LOC122420599	0.769951	0.0319975
MAD2L2	0.770392	0.00295503
F2	0.770573	0.0423294
FAHD2A	0.770783	0.0271929
TMEM129	0.770794	0.000593431
ZNF174	0.771205	0.00727059
MRPS2	0.77241	0.0240218
LOC122446462	0.772491	0.0173247
C6H14orf93	0.773344	0.00251997
GTF3C5	0.77343	0.0227323
GPAA1	0.774732	0.0147075
ERAL1	0.776989	0.0102257
ARFIP2	0.777337	0.0055084
LGALS9	0.777684	0.0195892
LOC122438821	0.778429	0.0221005
LOC122440217	0.778532	0.0141319
TEDC2	0.778679	0.0075638
LOC122449044	0.778753	0.0381453
GSTZ1	0.778943	0.00216967
RAB9A	0.779727	1.08e-05
LOC122452924	0.78028	0.00957373
NANS	0.780326	0.00695074
PTEN	0.781102	0.00297384
LRSAM1	0.781819	0.00310605
ANKRD23	0.783817	0.00129399
UFD1	0.784017	0.00167235
CEP164	0.785952	0.00368773
CENPX	0.786133	0.0268791
FAM180B	0.786627	0.020072
IER5L	0.7868	0.0116939
LOC122437264	0.7904	0.00457096
ZWINT	0.791112	0.0344169
AMIGO3	0.79269	0.0221305
ZDHHC9	0.793405	0.000115136
BCAS4	0.794721	0.00617009
PPARA	0.794917	0.00358713
MRPL38	0.794932	0.00435555
LOC122440783	0.795163	0.00694434
TTI1	0.796096	0.0017611
CD7	0.796621	0.0188803
CC2D1A	0.796678	0.0183282
FBXL6	0.79683	0.005494
LOC122448488	0.797117	0.0390841
RPL7A	0.797183	0.00317399
LOC122447113	0.797709	0.00053197
CBX2	0.799776	0.0415378
HIC1	0.802284	0.0356411
GPSM1	0.80238	0.0277599
LOC122441115	0.80249	0.0130349
LRRC24	0.803591	0.00447171
PARP12	0.804812	0.000937111
LOC122441459	0.805147	0.035185
LOC122439966	0.805356	7.17e-06
LOC122442251	0.805356	0.0229625
F12	0.805755	0.00662054
LAMTOR4	0.805975	0.0104938
MYBL2	0.80675	0.0179714
CFAP410	0.810431	0.000333757
YRDC	0.810559	3.53e-05
FITM1	0.812403	0.0011142
CHMP4A	0.81338	0.00523516
RBM6	0.813911	0.0012421
FLAD1	0.814306	0.0065832
CCNI2	0.814781	0.0310343
ALG3	0.814796	0.0127316
GPIHBP1	0.815418	0.0198568
EIF3G	0.815718	0.0266965
GLI4	0.815905	0.00250775
LOC122425503	0.816276	0.0207989
COMMD9	0.816375	0.00284235
UBXN7	0.816388	0.0030746
PRKACB	0.816901	0.0314705
ACAP1	0.817214	0.00565504
RRN3	0.817583	0.00770093
BST2	0.817821	0.0164707
AGPAT2	0.818197	0.00889709
CUL9	0.818808	0.00201699
HGH1	0.819086	0.0226431
RRAGC	0.819106	2.7e-08
LOC122451467	0.821421	0.0129097
ARFGAP1	0.823665	0.00355041
MIB2	0.823877	0.00939285
CIDEB	0.823879	0.000271959
STARD5	0.824549	6.53e-05
LOC122452013	0.826039	0.0405517
DTNB	0.826069	0.0099491
ADORA1	0.826721	0.0170654
ATP8B3	0.827491	0.00111191
LTB4R	0.828285	0.00145366
SLC37A4	0.828663	0.0029339
LOC122437840	0.829097	0.033161
GPR25	0.829475	0.0338297
LOC122437548	0.830525	0.00316444
ST3GAL3	0.830572	0.0304559
MCRIP1	0.830696	0.00647974
KCNK5	0.831549	0.0133776
LRCH4	0.83157	0.00402292
HAAO	0.831809	0.0019879
C2H1orf54	0.832445	0.0146791
AKAP8L	0.833066	0.00302019
C5H9orf116	0.834277	0.00119276
CD79B	0.836483	0.0210668
KDM1B	0.83697	0.0109891
LOC122449565	0.837129	0.0306082
LOC122423300	0.838353	0.00091333
CCDC17	0.838624	0.00644295
LOC122443097	0.840148	0.0175493
HOOK2	0.84021	0.012282
AIFM3	0.84063	0.0382799
TASP1	0.840835	0.00921346
RPL26	0.840984	0.000603551
G6PC3	0.841599	0.00153518
CCDC107	0.842003	6.96e-05
ACY1	0.842533	0.00595549
STK11	0.842842	0.00323794
ABCA2	0.843785	0.0271023
DGCR6L	0.844367	0.0196265
LOC122421039	0.845056	0.000284618
CHI3L2	0.84559	0.00125521
SAFB2	0.846989	0.000118344
MRPL40	0.847491	0.00639661
CEP131	0.84762	0.0064136
LOC122444845	0.848599	0.00602123
SRSF6	0.849562	0.000977571
TCFL5	0.851094	0.0292058
CALML4	0.852121	0.0084017
PAFAH1B2	0.852723	5.7e-05
UBE3D	0.85343	0.00287457
LOC122448510	0.854733	0.0251463
MSTO1	0.855204	0.000631216
LOC122445940	0.855336	0.0239138
ECSCR	0.856165	0.0326802
GFUS	0.856388	0.000480884
AURKAIP1	0.857299	0.00421862
PFKL	0.857525	0.0187572
ITGA2B	0.860959	0.0361067
LOC122452146	0.861551	0.0305628
INCA1	0.862117	0.047261
LOC122452018	0.862603	0.00702781
ADCK5	0.865043	0.000156186
GBGT1	0.866817	0.00939318
MZT2B	0.867454	0.00891086
LOC122425613	0.868196	9.31e-05
ADA	0.868529	0.0321218
LOC122443894	0.869056	0.0325883
TOP3A	0.869811	0.00265348
CLN6	0.870005	0.0382964
RRS1	0.870573	0.00091595
RAB20	0.870789	0.00531831
PRRT2	0.871477	0.00505138
EXD3	0.872763	0.00117339
LOC122440218	0.875134	0.00228539
TARBP1	0.875534	1.89e-06
KLHL22	0.878536	0.00951691
INO80B	0.87856	0.000660473
LOC122420925	0.879291	0.0308326
SH2B3	0.879814	4.7e-09
LOC122446754	0.880774	0.0184528
ACAP3	0.88196	0.00935806
ASPSCR1	0.88212	0.00323348
KLHDC9	0.883512	0.0259373
SPRN	0.884593	0.00268925
NAT9	0.885779	0.000243456
PRKCE	0.886265	0.000223589
PIAS1	0.886462	2.62e-07
LRRC25	0.886567	0.00326593
GPT	0.886662	0.00151769
HDDC2	0.887059	0.034829
C2H1orf210	0.88748	0.0126157
ADCY4	0.888133	0.00171134
ULK2	0.888137	2.76e-05
ANKMY1	0.888445	0.0215879
ACVR2B	0.889258	0.000108917
LOC122449416	0.890983	0.000600519
CLIC3	0.89287	0.0176981
MYO18B	0.894444	0.0100746
PCNT	0.895565	1.03e-06
HMG20B	0.895567	0.00144543
DYNC2I2	0.895872	0.013771
MPND	0.897055	0.00116754
RAB8B	0.897251	0.0158805
ISYNA1	0.897738	0.00741799
SFXN2	0.898646	3.39e-05
C13H1orf159	0.899605	0.000222216
TTC8	0.900486	0.00721432
KCNIP2	0.900699	0.00542872
RXRB	0.900847	0.00647945
DENND1C	0.901204	0.00122174
AMT	0.901421	0.000147211
SSB	0.902945	6.34e-05
D2HGDH	0.903142	0.00159098
GPS2	0.903209	0.00392523
RRM2B	0.903245	0.0389043
ERI3	0.903666	0.00063557
CENPB	0.904963	0.00117379
PKN3	0.905679	0.027118
LOC122451081	0.905835	0.0469188
LOC122438651	0.905984	0.00116766
GSDMD	0.907122	0.00650948
KRTCAP3	0.907375	0.00951917
SRSF7	0.907958	0.00326664
TOP3B	0.908928	7.19e-05
CD276	0.90929	0.000895333
FUT7	0.909735	0.00641666
PPM1N	0.91013	0.00612669
TYMS	0.910995	0.0010151
FASTK	0.91118	0.00343907
EMC9	0.913387	0.00460915
LOC122436546	0.915436	0.0356593
LOC122448642	0.915658	0.0286514
TTF2	0.9175	6.87e-07
B3GNT3	0.919406	0.0104259
NAPA	0.919524	0.00762108
IL17RE	0.91984	0.00515718
ZBTB5	0.921105	6.54e-07
NDOR1	0.922049	0.00430182
KDM5A	0.922505	5.7e-07
AK1	0.926619	0.00161108
GOLGA7B	0.927225	0.00622017
LPIN3	0.927322	0.0155312
L3MBTL1	0.927691	0.00304789
SLC7A5	0.929936	0.0028186
LOC122442259	0.930715	0.0186269
LOC122440436	0.9314	0.0260122
GFPT2	0.932151	0.0468613
ADAT3	0.93381	0.0283459
FOXS1	0.934517	0.00710703
ANGPTL4	0.936405	0.00965328
SMARCA5	0.938452	0.000593726
LOC122446381	0.938938	8.7e-05
AP1G2	0.940206	0.000269594
DERL3	0.940808	0.0149921
LARGE2	0.942939	1.02e-05
MPL	0.943937	0.0307719
LARS2	0.944632	0.00107984
LOC122425045	0.944798	2.66e-06
ZBTB20	0.944879	0.00131696
CAVIN3	0.945756	0.0151663
RHEB	0.947468	0.036944
C1H17orf97	0.947721	0.00678256
LOC122440761	0.947765	0.0100618
FUCA1	0.947817	0.000746115
MZB1	0.950609	0.018831
SUPT20H	0.950896	8.91e-07
FDXR	0.957216	0.00289018
LOC122420342	0.957671	0.0318007
LOC122438652	0.958414	0.00529736
EI24	0.958816	1.24e-05
PPOX	0.958951	0.000254639
MARK4	0.959155	0.00225364
MMP23B	0.962354	0.0207569
FXYD6	0.962382	0.00307515
LOC122437415	0.964656	0.00390942
LY6E	0.967118	0.0146483
PCED1B	0.967822	0.000975975
TIMM21	0.968806	8.73e-05
ZFHX3	0.972026	0.00878681
RPS6KC1	0.972034	3.1e-05
MAPK8IP1	0.972455	0.019132
LOC122419589	0.972732	0.0126032
PSMD12	0.975458	1.49e-06
LOC122450047	0.978713	0.0415757
DNM1	0.978725	0.00281473
CARD9	0.978802	0.000785049
NDUFAF3	0.979633	3.13e-06
ZSWIM3	0.981033	0.000270984
LZTFL1	0.981754	0.000632868
PGLYRP3	0.981787	0.00275703
CACFD1	0.984008	0.015961
LOC122445018	0.984593	4.03e-06
MROH6	0.9846	0.00467801
LOC122432062	0.984903	0.0206546
TMEM92	0.986163	0.0381883
ARL6IP4	0.986385	0.000162591
EMP2	0.989874	0.0297151
LOC122450939	0.992518	0.00521445
RPS15	0.992645	6.16e-05
ADGRL1	0.99289	0.0101961
TSNAX	0.993856	0.021714
LOC122451552	0.994054	0.0342519
MDK	0.995667	0.00348369
LOC122452044	0.996017	0.0164249
LOC122442218	0.996282	0.000908218
DCBLD2	0.996508	0.0265974
NFU1	0.997544	1.31e-06
LOC122441728	0.997638	0.00724487
KIFC2	0.99791	0.000103846
ZNF19	0.998916	9.21e-05
ASGR1	1.00193	0.00313954
SLC16A1	1.00292	0.000430472
SEMA5B	1.00379	0.00368789
RPL27	1.00464	0.0212343
PHF20L1	1.00512	0.000131521
LINGO4	1.00519	0.0270038
AK7	1.0056	0.0219512
HSBP1	1.00594	0.00232996
LOC122432231	1.007	0.000580319
CREB3L4	1.00711	0.0002105
LOC122451278	1.00781	0.0262219
LOC122424706	1.00891	0.00618458
GPR35	1.01138	0.040091
TRIM36	1.01622	0.0121446
PARD3B	1.02125	4.33e-05
YIPF2	1.02328	0.00022211
USPL1	1.02414	0.0149232
LOC122444802	1.02491	0.000124282
MFSD3	1.02631	0.0186759
RSPH1	1.02646	0.000248484
ATG2A	1.02663	0.000198146
PPIE	1.02683	1.2e-05
SMG6	1.02903	0.000579779
LOC122450155	1.03114	0.00696249
ME2	1.03278	1.47e-11
POGK	1.03401	1.84e-07
BRPF1	1.03542	3.9e-06
FZD4	1.03586	0.00271546
LOC122448764	1.03643	5.86e-07
BAIAP2	1.03785	0.000309638
CHD5	1.03924	0.0247152
ABCB9	1.04372	6.75e-05
LOC122446461	1.04403	0.0406745
LOC122421261	1.04418	0.0324348
SFXN5	1.04608	0.000453275
SMYD3	1.04789	4.21e-06
NELFCD	1.05179	0.000202525
ORAI2	1.05261	0.00383038
RFX7	1.05385	0.00627496
NSUN5	1.0545	4.34e-06
LOC122452202	1.05565	0.000694901
PPIF	1.05664	1.79e-05
CDCA2	1.05811	0.00180957
AEBP1	1.06037	0.0152076
USP13	1.06452	0.000906677
MUS81	1.06586	1.86e-05
TSTD1	1.06649	0.000522511
CLIC4	1.06685	0.00159433
ARTN	1.06772	0.0383864
MSANTD2	1.06816	2.13e-08
MXRA8	1.06908	0.000344568
FEN1	1.06969	0.0012767
SUFU	1.07261	2.66e-07
TG	1.073	0.00178659
TIMM50	1.07485	0.000150324
ZNF133	1.07547	3.72e-08
VPREB3	1.07674	0.0332709
LOC122442437	1.07704	0.00168684
FBXW5	1.07728	0.000989338
NADK2	1.07793	0.0311419
LOC122440586	1.07863	0.000175363
LOC122438853	1.07912	0.00147633
LOC122451868	1.07965	0.00955365
SNX1	1.07986	1.62e-10
SSH1	1.08021	1.33e-08
CPXM1	1.08022	0.00342897
CARNS1	1.08072	0.0133265
NENF	1.08204	6.25e-06
SUMO1	1.08586	0.0261904
RGSL1	1.08618	0.00119908
CAPN11	1.0865	0.00231869
THBS1	1.08691	0.01735
RABEP1	1.08849	0.000135276
NRBF2	1.08863	0.00207972
PPIB	1.09462	2.59e-05
GAN	1.09685	0.000140107
RRAS	1.09722	0.000264769
LOC122419957	1.0988	0.0262331
TOPBP1	1.09969	3.77e-11
ZNF296	1.10044	0.00109326
LOC122436721	1.10424	0.0281847
LOC122446612	1.10581	0.000263031
LGR6	1.10703	0.00124468
CACNA1A	1.10772	3.34e-05
FAM149A	1.10823	3.34e-06
SLC25A41	1.10937	0.000401332
LOC122446677	1.10958	0.0465527
NAGA	1.10977	0.000184474
HID1	1.11015	0.0129574
LOC122433599	1.11402	0.00642915
C27H21orf62	1.11472	0.00106101
MMP11	1.12045	0.03028
ATP2B2	1.12083	0.000813823
ZFAND3	1.12183	4.25e-07
LOC122435042	1.12236	0.0381453
PUSL1	1.12259	0.000101456
LOC122442252	1.12392	0.0142286
SENP5	1.12524	1.95e-05
LOC122426371	1.12538	2.66e-05
TXNDC15	1.12981	2.08e-08
CERS1	1.13062	0.0124945
TAF5	1.13087	3.25e-07
CENPE	1.13335	0.00667384
VASN	1.13409	0.0208216
ZNF667	1.13443	0.00327826
LOC122443378	1.13696	0.0221886
FAM114A1	1.1386	5.8e-05
LOC122442813	1.14406	0.00541253
MVD	1.14421	4.67e-06
HSD11B1L	1.14602	0.00304554
TNFAIP8L1	1.14612	3.62e-06
LOC122441611	1.14695	4.6e-05
LOC122452348	1.14727	0.015368
LOC122438428	1.14734	0.000144032
SLC35A2	1.1479	6.13e-11
LOC122441204	1.1485	0.00888053
OTUD3	1.15195	3.08e-06
CENPM	1.15475	4.55e-05
TGIF2	1.15507	1.64e-09
RASSF7	1.1552	0.00290416
UBXN11	1.15559	0.000448896
LOC122437256	1.15586	0.00908785
VPS54	1.15629	0.00627565
XRCC6	1.15678	2.11e-10
PSMD4	1.15885	0.000249298
LOC122441067	1.15985	0.0397133
EIF2S3	1.15993	2.86e-06
PITPNB	1.16053	2.93e-14
LOC122437009	1.16084	0.0434528
USP5	1.16121	0.000700558
LOC122433856	1.16597	0.0245474
NIBAN3	1.16937	0.000429375
PDCL	1.16971	4.96e-05
PPP1CA	1.17028	2.43e-05
SNIP1	1.17069	7.25e-07
LOC122451704	1.17119	0.00329976
SYNJ2	1.17291	0.00134266
ISG15	1.17292	0.00118137
LOC122440326	1.17429	0.0084017
CORO6	1.17436	0.00883995
KNDC1	1.17458	0.0173247
LOC122448001	1.17587	0.0163378
MBLAC1	1.17656	0.000339139
RASGRP3	1.18215	0.000157773
LPCAT3	1.18249	2.89e-05
ZNF346	1.18296	0.000413297
NEK1	1.183	1.55e-07
LOC122440402	1.1832	0.000871719
PSMC2	1.18556	2.81e-07
LOC122443394	1.18939	0.00341467
LOC122423112	1.19018	5.88e-05
PSMA2	1.19053	0.0139654
TSR2	1.19079	1.51e-10
LOC122434020	1.19153	2.46e-05
PTGER3	1.19183	0.0330965
PSEN1	1.19522	8.93e-11
TOR1A	1.19559	5.41e-12
LOC122432972	1.1971	0.000389957
ASB7	1.19729	4.23e-08
RABEPK	1.19816	5.53e-08
RRM2	1.20023	3.16e-07
SURF2	1.20046	2.59e-08
TRAK1	1.201	6.15e-08
LOC122451812	1.20196	0.00194367
PHTF1	1.20264	0.000121266
MRM2	1.20276	1.75e-09
ADAMTS13	1.20386	0.0137626
LOC122441353	1.20449	0.0094254
SYT11	1.20469	2.5e-06
LOC122451518	1.20498	0.0495496
TAOK2	1.20544	7.85e-06
RELL1	1.20662	1.85e-05
RMDN2	1.21238	7.03e-05
LOC122450665	1.21272	0.0103982
RALGAPA2	1.21346	3.89e-07
C22H3orf18	1.21357	8.01e-06
WDR31	1.21376	0.0281652
ITGB4	1.21441	0.0154037
POLR2K	1.21545	0.000905178
SLU7	1.2166	0.0163635
C13H1orf115	1.2171	0.000765332
TERF2	1.21769	3.17e-09
TRIB2	1.21852	5.49e-05
LOC122440708	1.22163	0.0426369
LOC122421723	1.22291	2.96e-05
ARL6IP6	1.2242	0.0120359
SERPING1	1.22603	0.0426302
THBS3	1.22648	0.0141127
LOC122435548	1.22774	0.0069895
LOC122452387	1.22879	0.0381428
LOC122426673	1.22916	3.26e-06
PHLDB3	1.22927	0.0016484
LOC122438667	1.2299	1.27e-05
PHF19	1.23094	1.94e-05
MYO15B	1.23675	0.000542599
GPR179	1.23746	0.0116569
LOC122446182	1.23762	0.0123811
CERS4	1.23973	0.011304
LOC122442705	1.24056	0.00789365
ZNF568	1.24239	0.0392977
GALT	1.24246	0.00053535
ERCC6L	1.24351	6.51e-06
ALDH3A1	1.24475	9.87e-05
FNDC4	1.24655	0.0434702
AIG1	1.24671	0.0001381
POLG2	1.24816	1.13e-07
ZFPM1	1.24901	0.00159216
CCDC183	1.25061	0.0145392
UBE2J2	1.25138	8.45e-10
RAB2B	1.25203	4.5e-06
ZRANB3	1.25266	0.00136085
NR2C2	1.25549	8.86e-05
NEK11	1.25569	0.00649917
SYNJ1	1.25597	3e-12
LOC122454173	1.25858	6.51e-06
VRK2	1.25967	9.55e-10
RNASEH2A	1.26276	0.00952518
NLN	1.2641	5.1e-06
LOC122448139	1.26512	0.00187394
SLAMF9	1.26737	0.0153146
LOC122440525	1.26958	0.0473027
WDR46	1.27007	0.000301142
LOC122438844	1.27015	0.00853242
LOC122430596	1.27289	5.81e-06
PICK1	1.27489	1.86e-09
COL6A2	1.27541	0.0240063
TMEM65	1.27594	0.0166466
LOC122425648	1.27632	0.0395344
RAD52	1.27988	7.64e-12
AURKC	1.27995	0.0133797
TOMM22	1.28061	5.39e-13
AGMAT	1.28073	0.0166466
PDK1	1.28452	0.0100603
RBM18	1.286	1.19e-06
CDK2AP2	1.28634	0.000654335
ELF3	1.28895	0.00368765
ZNF286A	1.289	4.5e-10
NOL4L	1.28952	1.85e-07
EVA1B	1.2913	0.000505648
CCZ1	1.29214	4.45e-06
LOC122422360	1.29486	0.00648209
LOC122441831	1.29524	0.0383485
TRAPPC10	1.29886	1.68e-05
NFIA	1.30001	2.2e-06
POLR3G	1.30004	0.00982374
SRSF2	1.30018	2.84e-05
CNOT9	1.30125	9.39e-15
TMC8	1.3015	5.39e-07
XRCC2	1.30223	0.000204011
LOC122442561	1.30301	0.0382553
TGM2	1.30347	0.00892237
RANGAP1	1.30406	0.000720156
LOC122441988	1.30496	7.64e-05
ASDURF	1.30691	0.034122
P4HA2	1.30722	1.29e-08
LOC122446632	1.31398	0.00187791
SLC66A1	1.3151	2e-08
DDX19B	1.31529	7.95e-07
NIPA2	1.3173	3.47e-06
LOC122439764	1.32033	0.019838
LOC122435830	1.32087	2.42e-05
NUP62	1.32128	1.33e-05
LOC122448613	1.32182	0.000262092
TAPT1	1.32254	3.05e-07
LOC122421677	1.32574	4.63e-08
CEP135	1.32695	0.0303406
ZNF25	1.32701	0.0292919
TBC1D10B	1.3279	1.87e-05
STMN3	1.32894	0.00202587
TXNL4B	1.33089	7.69e-12
VPS26A	1.33222	4.05e-05
ZNF414	1.33273	2.35e-06
LOC122451740	1.33276	0.00939318
SGO1	1.33286	2.03e-06
LSM14A	1.33353	1.94e-13
LOC122436231	1.3338	1.86e-05
DNALI1	1.33508	0.0486079
GZMA	1.33835	2.07e-06
LOC122424161	1.339	0.0201517
LOC122432828	1.34112	0.0485933
FAM83A	1.34114	0.0392977
GNAZ	1.34115	0.00566159
ORC4	1.34317	0.013163
LOC122441987	1.34426	0.039509
TMEM38A	1.34487	0.000530841
LOC122425179	1.34974	0.000199733
PPP4R2	1.35274	0.00217777
SLC25A30	1.35374	1.09e-06
TIMM22	1.35382	2.2e-09
PALS2	1.35643	0.000380068
LOC122449406	1.35704	0.012371
SLC43A3	1.35865	1.44e-07
LOC122445618	1.35919	0.00689533
LOC122434981	1.35992	4.93e-06
SLC6A7	1.3606	0.000223024
PPTC7	1.36162	1.92e-05
LOC122424993	1.36168	0.0465802
CBFB	1.36325	8.15e-05
ALDH3B1	1.36569	2.74e-06
IFNLR1	1.3658	5.42e-06
UBTD1	1.36621	6.48e-05
LOC122445274	1.3707	7.88e-05
NMRAL1	1.37091	0.000960983
GP1BB	1.37149	0.00588294
LOC122429723	1.37309	0.000219467
LOC122444442	1.37395	0.00836263
PDE8A	1.37452	3.02e-08
TIMM17A	1.37573	9.54e-09
LOC122420598	1.37589	0.00108288
STAU1	1.37891	1.75e-15
AKAP6	1.3807	0.00637461
ADI1	1.38135	0.000218023
SDHAF1	1.38189	3.56e-09
LOC122451130	1.38219	0.0162141
TNFRSF13C	1.38296	3.42e-06
TEX264	1.38419	7.22e-06
ABCC2	1.3843	0.0120641
LOC122421087	1.38671	0.0026968
PUM3	1.38809	1.2e-08
NOC3L	1.38919	1.48e-12
BARD1	1.39265	0.000555745
ZNF330	1.39266	4.44e-05
FKBP3	1.39437	0.000102631
LNP1	1.39441	4.91e-07
ZNF362	1.3947	2.56e-07
TMEM131	1.3991	5.79e-08
POGLUT1	1.40055	0.000104954
LOC122452399	1.4012	4.72e-05
LOC122442793	1.4024	0.0231996
UCK2	1.40242	1.17e-08
LOC122438266	1.40326	0.00356947
LOC122433121	1.40736	0.0137803
ZMYM4	1.41112	4.23e-05
GRIN2C	1.41425	0.0342523
C17H15orf40	1.41649	1.95e-06
LOC122424884	1.4173	0.000348962
SEMA6A	1.42146	0.0337818
NAT14	1.42192	8.86e-05
LOC122442786	1.42507	0.00896384
LOC122421498	1.42508	0.00113362
THBD	1.42514	6.14e-05
LOC122446189	1.42621	0.0268588
LOC122432233	1.42651	0.0265062
XPC	1.42729	5.18e-10
LOC122443184	1.42829	0.0452524
LOC122420724	1.43109	0.00936362
C18H19orf18	1.43136	0.000142899
LOC122442395	1.43181	0.000923547
LOC122420100	1.43312	5.86e-05
ZFAT	1.43575	2.37e-06
LOC122433457	1.43775	0.00530847
SLIT1	1.43815	0.000831909
YIPF1	1.4383	1.38e-06
PCYOX1	1.43925	4.73e-08
PSME2	1.444	2.3e-06
SDHB	1.44563	6.36e-16
LOC122423344	1.44693	0.00263457
TCP11L1	1.44708	9.02e-11
TRAPPC5	1.44795	6.77e-13
LOC122426659	1.44828	7.66e-05
VAMP3	1.44862	2.07e-16
TAF1	1.44928	2.33e-08
ADAMTS6	1.44956	8.7e-05
PRPF38A	1.45142	1.05e-08
PRAF2	1.45261	3.08e-09
TIMELESS	1.45358	6.82e-09
LOC122445305	1.45508	0.00336299
BSPRY	1.45633	0.000178791
LOC122441056	1.45767	0.0382671
SLC35F3	1.45845	0.0263145
LOC122431335	1.45896	0.0006382
QTRT1	1.46082	1.05e-07
PPP2R5E	1.46258	4.26e-08
MOB1B	1.46629	0.00360452
LOC122427482	1.46888	5.96e-10
A4GALT	1.47033	1.76e-05
SLC39A11	1.47111	2.08e-15
TGS1	1.47129	1.17e-16
LOC122454916	1.47179	2.2e-06
PDCD7	1.47398	4.66e-20
LOC122433438	1.47484	0.0196977
COMMD4	1.48229	3.64e-17
WDR97	1.48282	7.6e-06
QRICH2	1.48336	0.0474459
LOC122429725	1.48361	0.000689336
BRCC3	1.48394	5.46e-06
LOC122440480	1.48461	0.0131649
LOC122432614	1.48598	0.0253131
WRAP73	1.49022	9.81e-10
LOC122448140	1.49044	0.00771875
TMEM120B	1.49256	1.03e-08
LOC122435946	1.49325	0.00377888
FANCC	1.4937	5.18e-12
RPS27L	1.49579	3e-06
CFAP97	1.49601	0.00010498
RAD9B	1.49614	1.42e-05
TXNDC16	1.49684	0.00464922
LRRC4	1.49714	0.0323759
TNFRSF4	1.49847	5.26e-06
TLE4	1.50071	4.04e-13
LOC122423126	1.50146	0.000809283
CRY1	1.50244	3.17e-08
AVIL	1.50379	0.000879334
LCN12	1.50389	0.0479463
CDON	1.50518	4.15e-07
LOC122444724	1.50554	0.0230529
ADAMTS4	1.50567	0.0321565
ZC3H12C	1.50712	0.00172737
VPS8	1.51013	6.71e-14
MORN1	1.51324	0.00025061
SCAND1	1.51349	4.13e-06
SFXN4	1.51372	1.18e-15
LOC122442372	1.51505	9.84e-08
LOC122445708	1.51519	0.0255697
LOC122452342	1.51942	0.0266705
PARL	1.52062	5.01e-11
USP1	1.5239	0.000508088
NRF1	1.52423	1.03e-19
ZNF12	1.52623	9.19e-05
LOC122419781	1.52707	0.00560513
LOC122420604	1.52709	1.26e-05
SMAD6	1.52754	6.41e-06
ZNF318	1.52768	3.1e-14
UCHL3	1.53051	1.47e-10
NUBP1	1.53092	4.78e-11
TRAM1	1.5312	8.94e-05
MMGT1	1.5315	0.000329208
POLA2	1.53275	5.92e-09
PAFAH2	1.53324	8.66e-08
LOC122441737	1.53376	0.000192396
RUNDC3A	1.53477	1.12e-05
ANGPT4	1.53927	0.00105657
CPNE9	1.5417	3.25e-07
ULK3	1.54667	2.97e-22
RPLP1	1.54816	2.09e-07
POLR3H	1.54893	6.91e-10
PHLDB1	1.55027	1.33e-08
PAM16	1.55055	1.5e-09
EGFL8	1.55075	1.74e-07
ATRX	1.5514	1e-08
YWHAH	1.55142	3.38e-11
LOC122423125	1.55219	0.00141036
LOC122425210	1.5527	0.0311425
LOC122420587	1.553	0.0144458
LOC122427600	1.55397	0.00104831
TRIM35	1.55514	2.24e-10
BLOC1S5	1.55744	8.56e-11
TPD52	1.55814	0.000149014
PTGER2	1.55823	0.00560868
LOC122434456	1.55964	0.000296235
LOC122420562	1.56025	0.000221977
GXYLT1	1.56053	0.000876193
RNF152	1.56095	0.000558722
DDIT3	1.56108	6.5e-12
SLC35B4	1.56111	1.95e-16
LOC122437811	1.56218	0.000142169
PPP2R1B	1.56594	3.09e-10
QSOX2	1.5663	1.23e-19
PKN1	1.56663	2.59e-07
LOC122455051	1.56777	0.00199443
NAALADL1	1.56867	1.9e-06
TMOD4	1.56907	2.22e-12
ANKRD24	1.57172	0.0111789
LOC122443784	1.57239	0.00398238
GPATCH1	1.57388	6.53e-11
CLCN5	1.57655	8.66e-08
SYPL1	1.57916	1.29e-10
UPF2	1.58003	2.83e-27
LOC122448491	1.58132	0.0229107
KIAA1614	1.58143	0.0419835
BICRA	1.58282	7.94e-12
HAUS5	1.58697	3.72e-16
VPS18	1.58997	2.61e-07
FLRT1	1.59076	0.000296122
TLCD2	1.59088	3.04e-07
PUM2	1.59297	1.79e-05
PARN	1.59308	2.12e-06
SNX22	1.59594	5.29e-07
LOC122430099	1.59676	0.0006708
SPRY4	1.59987	0.000106142
GNL1	1.602	2.29e-07
LOC122447338	1.60235	4.55e-05
TMEM238	1.6031	2.59e-11
LOC122437522	1.60389	0.010337
NIF3L1	1.60701	3.21e-12
RHPN2	1.60894	1.97e-07
PLEK	1.61141	1.93e-21
C1RL	1.61278	6.6e-08
RPL21	1.61704	3.33e-08
UROS	1.61876	1.82e-06
LOC122434870	1.62338	5.4e-08
PPP1R16A	1.62603	6.41e-06
LOC122437944	1.62635	0.0183685
KRT19	1.62892	0.0436478
ALDH4A1	1.62902	9.18e-10
LOC122423879	1.62951	3.73e-09
SLC9A3R2	1.62997	4.18e-06
LOC122441138	1.63392	0.000549994
LOC122432901	1.63436	1.4e-09
CALCRL	1.63576	0.00842563
ZNF614	1.63764	0.000375427
LOC122449033	1.64466	0.00489468
LOC122444510	1.64566	0.0314639
NEMF	1.6462	3.46e-11
PIGQ	1.64658	9.09e-07
ST7L	1.64811	0.000332185
SDC2	1.64915	0.00887273
LOC122425866	1.65078	9.18e-05
UTP4	1.65281	2.78e-09
LOC122445041	1.65382	0.000183007
SLC6A12	1.65508	0.00301452
NOCT	1.65937	1.22e-09
ZDHHC6	1.65988	6.16e-31
RITA1	1.66035	1.16e-06
RNASEL	1.66067	1.14e-12
LOC122437508	1.66187	0.0251463
LOC122446663	1.66367	0.0249398
PCGF1	1.66462	3.15e-18
LOC122431240	1.6662	3.75e-08
SRBD1	1.66737	5.72e-15
POLR2G	1.66782	2.2e-18
TOR4A	1.67546	3.01e-06
PFDN5	1.67664	2.25e-09
LOC122420533	1.67898	0.00285269
ZFYVE9	1.6796	2.7e-20
ZNF554	1.67962	4.23e-05
TULP4	1.68592	9.81e-09
LOC122449984	1.68759	0.00644182
LOC122420101	1.68798	1.42e-11
CPEB2	1.68996	0.0039961
ZDHHC18	1.69	3.12e-13
GMPPB	1.69016	9.21e-11
GDF15	1.69031	2.22e-07
KMT5B	1.69076	1.01e-12
RNF4	1.69224	1.28e-13
PMS2	1.69235	9.57e-18
LOC122438304	1.69249	0.0134521
PLD4	1.69325	2.49e-09
PINX1	1.69359	7.57e-07
INSL3	1.69483	0.000124347
PIGW	1.69541	0.000419066
LOC122452611	1.69764	0.0163745
USP30	1.69773	8.24e-17
PAPOLB	1.6979	3.81e-09
FBXO9	1.69906	2.35e-06
POMT2	1.70312	9.01e-12
ZNF385B	1.70819	0.00130686
AFG1L	1.70914	2.22e-11
C11H11orf94	1.71031	0.0245178
ELOVL5	1.71184	0.00366861
PIK3R2	1.71297	1.09e-07
BID	1.7136	1.49e-20
LOC122421458	1.71458	0.0123687
NMUR1	1.71549	1.76e-07
ZNF560	1.71629	4.87e-06
LOC122437355	1.71649	0.00029861
LOC122420432	1.71694	0.0154622
PLK4	1.7202	0.000108187
PGAP6	1.72146	1.07e-05
PIN4	1.72408	1.02e-07
THAP5	1.72429	0.000528205
VPS36	1.7252	1.63e-14
PPP2CA	1.7262	1.58e-26
RPL30	1.72696	5.23e-06
KIAA0754	1.73031	1.55e-06
LOC122446762	1.73493	0.00557617
LOC122428725	1.73605	6.77e-10
LOC122435945	1.73831	0.0361748
TRMT61B	1.73875	2.96e-06
XPNPEP2	1.73931	6.15e-12
NEU1	1.73934	6.57e-24
TRNAG-UCC_121	1.7395	0.0244799
SKAP2	1.73963	7.04e-07
LOC122449578	1.73982	3.01e-06
PPARGC1B	1.74044	3e-08
SMC5	1.74135	0.00105282
CDT1	1.74224	9.18e-08
AMH	1.74852	0.00656823
SCAMP4	1.74964	9.03e-08
LOC122424042	1.7508	1.61e-18
LOC122454894	1.75249	0.000154396
TTC19	1.75295	9.35e-21
RFC3	1.75453	1.41e-09
LOC122449046	1.75632	0.0020028
LOC122433905	1.75755	0.00113967
PROM1	1.75911	3.12e-15
RRP7A	1.75919	1.99e-07
LOC122447657	1.75941	0.00218371
TRIM52	1.76432	2.04e-09
LOC122420580	1.76479	2.45e-07
PLIN3	1.76874	2.27e-08
HRH1	1.77262	8.7e-07
LOC122423343	1.77302	0.00169826
SPACA6	1.77326	4.93e-07
TLCD5	1.77685	0.00725119
SLC19A2	1.77933	1.88e-05
PREPL	1.78218	7.52e-07
SAMD4B	1.78404	1.97e-11
SEPTIN7	1.78459	5.63e-10
PRC1	1.78466	2.52e-15
ATG2B	1.78524	1.89e-05
LOC122426630	1.78701	0.017309
WDR47	1.79144	1.6e-10
RRAGD	1.79396	2.26e-12
RPAP2	1.79477	6.52e-08
LOC122433302	1.79524	0.030521
GNGT2	1.79544	0.00064703
CIB2	1.79745	2.65e-06
NMD3	1.79806	1.93e-06
LOC122439791	1.7987	0.00794383
SLC37A3	1.80167	7.02e-15
RABL3	1.80179	9.88e-06
SMC3	1.80194	2.68e-11
FAM169A	1.80205	0.00016808
HSPB7	1.80221	4.84e-16
ACOT13	1.80281	6.45e-11
SFRP5	1.80516	0.0431684
TMEM50A	1.80558	8.99e-08
LOC122438374	1.80822	0.0101936
PPCS	1.80893	1.72e-18
SLC7A2	1.81063	0.000327335
CDK2	1.81111	3.99e-16
RPS20	1.81204	0.00113284
LOC122428652	1.81267	0.00659199
LOC122447636	1.81634	0.00036159
FAM126B	1.81656	0.000150585
AFDN	1.81688	0.000342147
LOC122429475	1.81967	0.00479901
PSD	1.82184	4.22e-06
HMGN2	1.82289	2.02e-10
WEE1	1.82289	1.21e-17
LOC122435167	1.82865	1.92e-05
USP33	1.83168	0.00126157
RSKR	1.83421	7.19e-08
PPP1R12B	1.83457	4.14e-15
LOC122426744	1.83922	1.11e-12
SAMD14	1.83978	6.35e-07
WBP11	1.8409	5.34e-19
LOC122424902	1.84149	0.028718
CFL2	1.84153	4.47e-05
SRM	1.84428	5.03e-11
C1QTNF1	1.84544	0.000455141
FAM120A	1.84559	9.08e-26
SLC6A19	1.84728	1.6e-05
LOC122422529	1.84855	1.17e-09
RNF14	1.84905	9.4e-05
SLC25A15	1.84931	5.45e-14
COL6A1	1.85007	4.19e-05
LOC122444801	1.85081	0.00274942
TUFM	1.85261	1.36e-08
TMCO4	1.85325	4.29e-15
LOC122429232	1.85553	7.67e-05
USP28	1.85582	5.86e-16
FGFR1OP2	1.85679	0.00100136
LOC122424809	1.85717	0.0195042
LOC122445856	1.85784	0.0345055
ZNF783	1.86076	6.5e-12
ELOVL6	1.8637	3.8e-10
ASIC1	1.86791	1.12e-12
UNC119B	1.86966	1.16e-13
UBXN1	1.87221	5.12e-13
SLC25A12	1.873	1.17e-23
PRDX3	1.87321	1.18e-12
RPS6KL1	1.87366	4.77e-06
LOC122448618	1.87525	0.000389929
QTRT2	1.8765	2.04e-17
ATF5	1.87761	7.44e-09
FAM229B	1.87822	0.00228888
COQ9	1.87921	1.2e-12
EIF3D	1.88009	7.87e-13
LOC122424389	1.88199	1.38e-08
ANGPTL1	1.88566	0.00201584
PSME3	1.88683	3.38e-15
DAXX	1.89024	8.43e-08
C21H12orf57	1.89026	7.87e-15
NINJ1	1.89122	1.57e-18
C30H9orf64	1.89509	2.29e-19
STX8	1.89813	2.21e-20
RNASEH2B	1.89912	2.6e-09
BLVRB	1.89993	1.61e-05
LOC122443518	1.90136	0.0194543
SRSF9	1.90513	3.94e-18
NRP2	1.90729	2.06e-10
VCPIP1	1.90999	1.49e-07
PIGG	1.91058	2.6e-22
RAB6A	1.91074	3.96e-12
LOC122428167	1.91078	9.66e-07
RBM26	1.91165	1.1e-17
LOC122437026	1.91235	0.0348981
SGO2	1.91285	1.08e-06
PHF1	1.91527	3.94e-16
UNC13A	1.91681	5.5e-12
TMEM88	1.92022	3.99e-08
CCDC71	1.92287	2.78e-11
PRUNE2	1.92401	4.11e-14
PPP1R12C	1.92484	3.62e-08
LOC122449917	1.9257	0.0420017
TRIM46	1.92714	4.05e-05
LOC122423110	1.92852	8.56e-07
OCRL	1.92912	2.75e-17
LOC122427744	1.93115	1.76e-09
LOC122452307	1.9328	0.0277968
XKR8	1.9339	1.2e-27
E2F8	1.93538	5.76e-22
P2RY11	1.93682	1.53e-10
PLD3	1.94113	2.8e-11
FSCN1	1.94168	1.49e-06
MYL10	1.94234	5.7e-06
SMPD4	1.94315	4.85e-12
NSF	1.94462	7.79e-28
RNF41	1.94544	2.52e-14
LOC122434216	1.94779	0.00668804
UBE2D1	1.94886	3.87e-07
XAF1	1.95868	2.79e-20
ACP4	1.96253	0.0012894
LOC122431702	1.9639	9.61e-09
WARS2	1.96495	4.57e-18
BLM	1.96561	3.55e-23
CHTF18	1.9664	8.88e-07
B3GNT8	1.96659	7.52e-07
PDIA5	1.96789	2.57e-19
LOC122454445	1.96969	2.63e-05
LOC122449217	1.97105	4.47e-05
SLC35D1	1.97174	2.65e-14
NT5C3A	1.9721	0.00071461
LOC122446662	1.9729	0.0358999
ZNF331	1.97416	9.86e-16
NALF1	1.97552	0.0358085
PACSIN1	1.97744	7.69e-07
LOC122454357	1.97863	1.1e-17
PRXL2B	1.97965	0.000132633
LOC122454432	1.98082	2.15e-11
SMIM10L2B	1.98326	8.69e-10
LOC122449109	1.98465	0.0121632
LOC122432102	1.9856	0.000406928
SS18L1	1.98607	3.68e-09
LOC122438605	1.98659	0.0275742
LOC122444918	1.98691	0.0324817
PIGU	1.98793	2.89e-20
LOC122437006	1.98808	0.00742628
TDRD1	1.98988	1.57e-17
LOC122420684	1.99134	0.00292541
MAP3K4	1.99194	6.08e-22
RNF187	1.99232	1.13e-14
WASL	1.99384	1.86e-11
TOR2A	1.99418	1.1e-16
STK19	1.99547	3.66e-17
ZNF32	1.99901	7.27e-07
TPP2	2.00008	1.9e-25
ZDHHC21	2.00148	0.00369497
LOC122436507	2.00312	4.29e-05
SMIM15	2.00362	0.00111291
LIMA1	2.00452	1.83e-10
MARCHF1	2.00535	0.000199748
TNPO1	2.00919	5.97e-07
EVA1C	2.01008	4.68e-09
GP6	2.01058	0.00164331
LOC122453420	2.01066	0.0475166
ZBTB21	2.01078	4.86e-09
LOC122429177	2.01227	0.000166548
BPHL	2.01322	2.48e-09
STAG3	2.01381	1.07e-09
LOC122442365	2.01542	3.61e-05
AP5B1	2.02485	1.46e-10
LOC122451668	2.02685	0.00938296
MOB2	2.02704	5.31e-14
LOC122432234	2.0277	1.77e-12
ZNF653	2.02779	8.7e-08
PIP4P1	2.02922	5.19e-26
LOC122430589	2.03159	2.19e-19
RBBP6	2.03207	1.92e-22
LOC122423541	2.03222	0.0144115
PSMD9	2.0336	1.15e-17
SERPINB12	2.03371	2.61e-09
TCTN2	2.0345	3.09e-18
PSMB5	2.03619	1.01e-15
LOC122446654	2.0366	1.76e-08
LINS1	2.03678	2.98e-08
YJU2B	2.03918	2.59e-11
PTPRK	2.03931	4.19e-09
LOC122455243	2.04058	0.023572
TPM4	2.04257	3.3e-25
LOC122424062	2.04424	0.00114416
ZBTB26	2.04436	0.00112572
GAS2L3	2.04592	3.24e-06
LOC122429541	2.05172	6.12e-10
TULP3	2.05191	2.14e-16
LOC122431363	2.05224	4.28e-15
NUP43	2.05231	6.71e-12
C28H6orf226	2.05568	6.61e-15
TSC22D2	2.05721	2.53e-14
LOC122429607	2.05798	8.85e-10
SNX2	2.05957	4.75e-10
ZW10	2.06345	4.7e-26
UBE3B	2.06417	3.33e-49
SAR1B	2.06476	0.000244907
LOC122451562	2.06529	0.0238251
CCNF	2.06587	1.35e-10
UBASH3B	2.06612	1.31e-37
ZFP3	2.06617	4.37e-09
HAUS1	2.06734	3.38e-10
TP63	2.06788	1.08e-05
LOC122443512	2.08021	0.0128036
UPK2	2.08628	0.00346258
LRFN1	2.08789	6.01e-12
LOC122454000	2.09267	0.00114407
PDK2	2.09321	8.55e-14
SPART	2.09487	0.00220128
NFX1	2.09515	1.11e-17
PCBD2	2.09934	1.47e-19
TRNAW-CCA_86	2.09978	0.000154972
LOC122427710	2.10244	6.9e-26
ZC3H8	2.10373	6.12e-12
KLHL18	2.10421	1.13e-18
LOC122446527	2.10573	0.00299633
LOC122432093	2.10655	5e-07
LOC122448494	2.10656	0.029887
RAB34	2.10922	1.72e-07
SOGA1	2.11156	1.16e-23
LOC122454628	2.11162	0.0372581
CCDC120	2.11243	1.24e-14
SAV1	2.1162	1.96e-09
RUNX1T1	2.11657	9.19e-18
SMARCA2	2.12082	8.43e-30
LOC122442765	2.12245	0.048797
LOC122429862	2.12394	0.000254629
LOC122431264	2.12495	0.0202131
TLE2	2.12614	2.34e-07
LOC122442834	2.12667	0.048748
USP21	2.12675	1.39e-17
TSPAN7	2.12861	1.24e-07
RAVER1	2.12872	2.24e-12
NLRP12	2.1335	7.62e-21
ARPP21	2.13552	1.17e-18
EIF4G3	2.13675	1.18e-30
NUGGC	2.13759	4.12e-11
LOC122435182	2.13802	1.48e-12
TIMM10B	2.14261	7.32e-18
TATDN1	2.14571	9.64e-08
NUDT18	2.14651	2.03e-18
LOC122437453	2.14768	0.0291132
SAT2	2.14792	1.04e-09
CTIF	2.14856	1.77e-14
CD200	2.15164	1.8e-09
PDSS1	2.15211	3.75e-11
KCNQ1	2.15328	4.33e-15
SNX33	2.1536	1.26e-14
LOC122423733	2.15371	0.00797183
SPATA25	2.15628	1.11e-12
UHMK1	2.15636	4.12e-05
C3AR1	2.1584	2.23e-06
MAGIX	2.16315	1.27e-12
FMOD	2.16688	0.0153928
TMEM106B	2.16969	2.06e-05
ZNF454	2.17024	1.72e-16
TBC1D15	2.17061	2.41e-07
ZNF584	2.17213	8.4e-13
PLXNA1	2.17373	5.39e-14
ZBTB7B	2.174	3.42e-17
ALG1	2.17517	5.59e-37
RPP40	2.17749	1.94e-09
RHOU	2.18054	6.71e-06
LOC122433470	2.18641	0.00339597
DES	2.18656	0.0127883
LOC122452030	2.18904	0.0339017
KIFC1	2.19076	2.56e-12
LOC122423045	2.19321	1.23e-14
TNFAIP6	2.19395	8.36e-17
NECTIN3	2.19476	0.0371811
PIGZ	2.19532	3.54e-15
C15H2orf88	2.19551	0.00401307
ZNF438	2.19601	4.13e-20
LOC122423572	2.19732	8.05e-05
NR3C2	2.19781	0.000357564
APEX2	2.1989	3.4e-14
LOC122429693	2.1993	7.54e-07
UMAD1	2.20081	2.78e-16
LOC122437409	2.20138	0.00100674
PDHX	2.20595	1.8e-11
TMEM144	2.20632	2.35e-05
NFE2L3	2.20644	5.42e-12
LMF2	2.2065	2.63e-11
SLC25A46	2.20708	9.22e-09
LOC122427647	2.20976	2.51e-05
PSTK	2.21383	1.61e-14
LOC122421481	2.21446	0.0165845
PPFIBP1	2.21494	4.97e-10
PEX2	2.21557	5.1e-26
LOC122433092	2.21796	0.00190051
SPNS2	2.21812	7.25e-10
UBLCP1	2.21951	7.89e-16
TRNAS-CGA_3	2.21975	0.00470588
MFAP1	2.22175	5.26e-20
NIT1	2.22363	1.58e-31
DNPH1	2.22633	1.71e-12
PIAS3	2.22731	5.04e-24
LOC122420179	2.23015	0.0066295
SF3A2	2.23026	6e-10
STXBP5L	2.23145	0.0383697
TRNAG-CCC_5	2.23507	0.0300345
LOC122439435	2.23619	0.00423135
MRPL18	2.23631	2.34e-48
GFER	2.23838	1.12e-30
SLC7A1	2.23842	2.06e-23
ALDH1L2	2.23939	3.27e-05
LOC122424033	2.23942	7.69e-10
LOC122431100	2.23949	0.00467912
LOC122443938	2.24145	0.0148299
USH1C	2.24393	5.43e-09
LOC122422122	2.24587	4.01e-06
LOC122450596	2.24739	0.0184203
RALGPS1	2.24832	1.57e-18
PNRC2	2.24907	6.03e-18
LOC122423114	2.2516	0.00111318
TP53INP2	2.25293	7.96e-16
RAD23B	2.25346	8.62e-27
TEPSIN	2.25654	1.02e-15
PCGF6	2.26002	3.62e-08
VAMP4	2.26115	1.05e-07
SEMA4G	2.26263	2.08e-11
ARL9	2.26418	0.00847426
FCGRT	2.26616	2.31e-13
SOWAHD	2.27038	3.19e-20
RRP15	2.27053	3.61e-27
ZNF2	2.27074	3.32e-43
WASHC4	2.27256	1.71e-05
LOC122435850	2.27418	0.000490982
FEZ1	2.27448	0.00840416
PEX13	2.27839	3.92e-05
SERINC5	2.2792	4.22e-19
LAGE3	2.27985	1.3e-26
PDCD2L	2.28035	1.08e-14
VANGL2	2.2804	2.95e-11
ZFHX2	2.28072	6.65e-15
VPS9D1	2.28181	2.79e-30
IL17RB	2.28231	2.49e-18
OSGEPL1	2.28287	9.76e-16
SETD4	2.28362	9.1e-28
UTP23	2.28684	1.46e-25
C32H7orf50	2.29008	6.66e-16
TRPV5	2.29176	0.00631587
TMEM234	2.29202	3.35e-26
THAP11	2.29204	4.67e-14
ZC3H6	2.29305	3.06e-21
DNAH7	2.29332	0.0196066
SH3RF1	2.29387	3.6e-23
NDUFB1	2.29415	3.08e-22
NECTIN1	2.29624	0.000612428
GPBAR1	2.30054	1.36e-08
LOC122447886	2.30082	0.0013625
RNF150	2.30189	1.09e-16
LOC122429972	2.30384	4.5e-11
LOC122443022	2.30419	0.000112721
LOC122455125	2.30465	0.0141051
RUSF1	2.30749	5.21e-13
TRAPPC3L	2.30838	2.4e-14
PRR7	2.30958	8.87e-13
EXOC3L1	2.31052	2.81e-10
LOC122441925	2.31102	0.00479618
ZBTB3	2.31214	6.94e-12
DDN	2.31608	0.000683084
FKBP10	2.32469	0.010997
USP38	2.32695	5.9e-17
TMX1	2.33416	3.9e-10
RABGGTA	2.33611	1.71e-15
TMEM17	2.3398	0.000150532
RABGGTB	2.33999	2.53e-05
BEAN1	2.34169	7.02e-10
LOC122426016	2.34172	5.42e-16
LOC122449182	2.34284	0.0417269
LOC122432560	2.34354	1.05e-15
TMEM37	2.34389	2.04e-07
CNEP1R1	2.34428	0.000221618
TMEM132A	2.34454	1.65e-09
LOC122434963	2.34577	7.53e-05
RAD54B	2.34602	4.03e-12
SHE	2.34727	1.21e-09
SAP30	2.34775	2.14e-11
AMIGO2	2.34817	1.67e-09
LOC122432896	2.3489	5.05e-06
IFFO1	2.35115	4.61e-23
PTCRA	2.35636	0.0297432
RASGEF1C	2.35686	3.8e-05
RAPGEF5	2.35731	4.66e-12
LOC122454397	2.35733	1.26e-10
SORBS2	2.35924	0.00506283
TBKBP1	2.36003	1.59e-10
LOC122424582	2.3614	9.08e-40
LOC122424129	2.36152	1.97e-07
SLC39A5	2.36279	9.65e-12
SLAIN1	2.36289	1.77e-47
FNDC9	2.36298	5.37e-05
RFX2	2.36307	6.89e-20
RBM43	2.3643	3.37e-22
LOC122454898	2.36611	0.01735
LOC122433178	2.36619	2.17e-07
LOC122429635	2.36641	6e-12
TMEM190	2.36663	0.025742
OAF	2.36872	3.09e-16
ZSWIM1	2.37406	6.94e-17
FBXL7	2.37491	0.000411546
SMAD5	2.37657	1.73e-06
SARDH	2.37939	2.13e-07
LOC122435898	2.38337	2.4e-12
LOC122435004	2.3838	1.86e-09
THOP1	2.38406	8.08e-12
LOC122423355	2.3848	8.37e-13
LOC122422250	2.38649	0.014924
UBE2L6	2.38962	1.22e-21
TSPAN1	2.39192	1.31e-07
TET1	2.39269	6.35e-07
ZNF484	2.39407	7.13e-06
ZNF212	2.39445	1.88e-16
YJEFN3	2.39518	1.68e-14
PLEKHH2	2.39636	1.25e-05
LOC122439767	2.39897	0.00545325
LOC122433976	2.3992	0.00483565
ANKRD33B	2.40018	1.16e-24
VCPKMT	2.40064	4.44e-10
SLC13A5	2.40307	0.00386255
ZNF140	2.40624	4.28e-14
RARRES1	2.40907	0.0032553
TNKS1BP1	2.41012	4.72e-14
PREB	2.41047	2.66e-25
ZNF786	2.41089	4.59e-18
LOC122435002	2.41332	7.55e-06
SPINDOC	2.41573	2.38e-21
LOC122435863	2.41718	0.0286242
SLC10A3	2.41946	3.79e-21
TMOD1	2.42021	7.41e-06
TNIP2	2.42036	2.93e-17
WDR72	2.42639	0.0346486
LOC122447102	2.42699	0.00137791
LOC122435818	2.42778	0.00244162
SH3PXD2A	2.42801	4.11e-08
TCAF1	2.42822	2.77e-22
UNKL	2.43078	1.74e-25
FAM3D	2.43115	9.81e-10
PNPT1	2.43526	8.13e-12
NIBAN2	2.44065	3.25e-20
C2CD5	2.44337	3.14e-15
RBM34	2.44392	5.63e-24
ZDHHC1	2.44785	2.92e-15
VAV2	2.44792	3.06e-17
B3GNT9	2.44949	1.46e-06
TMEM44	2.45224	0.000310677
PMPCB	2.45271	6.25e-26
LRP5	2.45323	7.63e-15
RBM4B	2.45331	1.44e-26
FAM135A	2.45396	6.79e-13
LOC122420914	2.45536	1.22e-07
RPL5	2.45606	3.03e-06
KLC3	2.45682	0.000452058
NSMF	2.45687	2.9e-16
NSUN4	2.45778	9.5e-30
LOC122426923	2.46084	0.035804
MRPS11	2.46507	1.72e-28
PLXND1	2.46508	4.13e-16
SENP1	2.46605	1.6e-24
ST7	2.46875	3.98e-24
SLC23A1	2.47093	1.86e-09
SPATS2L	2.47155	1.44e-27
CYTH3	2.47274	3.34e-29
NRIP2	2.47378	0.018169
MSANTD3	2.47479	0.00306927
RPUSD2	2.47594	1.79e-36
LOC122421381	2.47775	0.0442952
LOC122430856	2.47947	3.49e-22
LOC122422949	2.48007	0.00240388
LOC122424149	2.48008	0.00718434
TUBGCP3	2.4824	5.04e-52
OAZ2	2.48658	1.65e-35
LOC122422123	2.48682	0.0144524
LOC122435021	2.48698	4.21e-08
SLC9A9	2.48735	1.23e-27
RCOR2	2.48792	9.12e-10
BLOC1S4	2.49295	4.08e-15
LOC122448722	2.49301	0.0182551
TP53TG5	2.49559	6.75e-22
TICAM1	2.49625	3.38e-20
LOC122429547	2.4981	6.14e-34
AK6	2.49943	2.96e-05
CNOT3	2.50137	2.86e-17
PARS2	2.50407	9.92e-31
LOC122430140	2.50414	5.96e-10
LOC122436984	2.51468	0.0287036
LOC122428130	2.51722	9.61e-07
THUMPD2	2.51833	4.53e-16
LOC122436541	2.51944	0.0479852
WDR45	2.51984	3.26e-33
HEMK1	2.52075	5.14e-26
LOC122454097	2.52116	0.0208787
SNUPN	2.52224	6.26e-34
WDR35	2.52318	3.27e-14
ZFYVE19	2.5246	7.46e-19
C17H14orf28	2.52501	3.29e-06
SIRT3	2.52514	3.93e-29
CCDC81	2.52772	0.00531831
LOC122425128	2.52826	0.0053107
SLC46A1	2.52853	7.99e-33
NICN1	2.52863	2.12e-50
RCAN1	2.53086	2.29e-29
C28H6orf201	2.53423	5.71e-05
LOC122432089	2.53551	3.12e-11
CXHXorf38	2.53867	2.44e-35
RAB11FIP5	2.53915	2.7e-27
NDUFA4L2	2.54164	1.02e-05
LOC122454300	2.54216	2.46e-07
BEX5	2.5438	7.67e-16
PLEKHG4	2.54599	0.000106517
LOC122448869	2.5511	0.0107104
TSNARE1	2.55116	1.75e-27
MANBA	2.55331	1.47e-18
LOC122433021	2.55705	0.000263753
POLE	2.56009	2.92e-15
LOC122422926	2.56041	0.0181528
ENOX1	2.56069	0.026727
UBA5	2.564	4.35e-07
LENG9	2.56462	2.91e-09
RCN1	2.56712	1.58e-41
KAT5	2.56924	1.06e-21
CALCOCO1	2.56928	2.21e-25
HEPH	2.57177	9.16e-07
RGL1	2.57415	6.27e-11
UNC5A	2.57472	1.64e-21
RAD50	2.57681	1.72e-27
CHST7	2.57767	1.74e-11
PSD2	2.57869	8.61e-10
CNPY4	2.57886	1.28e-20
NYX	2.5796	0.00551952
TTBK2	2.58369	6.71e-08
TESK2	2.58468	1.63e-33
IL22RA2	2.58598	3.11e-13
NUP210L	2.58756	4.06e-25
URB1	2.5882	2.81e-23
PLB1	2.59375	1.53e-29
ZNF618	2.59675	4.19e-26
TMEM205	2.59701	6.38e-23
LOC122423737	2.59714	0.00874582
NECAP1	2.5978	3.31e-13
TMEM89	2.59929	3.66e-16
LOC122420050	2.60106	1.62e-17
MMP2	2.60275	6.51e-07
LOC122423963	2.60352	6.33e-22
POLR3F	2.6052	6.37e-12
UBC	2.60848	6.32e-15
UPK1B	2.60887	2.84e-08
REXO2	2.6114	1.03e-59
RRAS2	2.61153	2.1e-25
C27H3orf52	2.61615	0.00692579
LTBP3	2.61758	1.54e-10
BEND3	2.61929	1.54e-28
ZZZ3	2.6209	7.98e-09
LOC122435008	2.62131	9.75e-31
ZNF436	2.62184	1.14e-26
TOB1	2.62225	5.49e-12
TMEM161B	2.62254	1.82e-12
LOC122433499	2.62655	0.0479932
GAL3ST4	2.62793	2.85e-20
MRO	2.63299	0.000690707
GLO1	2.63425	2.21e-37
TBCE	2.63586	6.12e-47
LOC122430229	2.63662	0.017533
LOC122433125	2.63887	5.73e-06
CABLES1	2.64234	4.88e-16
SIRT4	2.64245	6.55e-12
AP5Z1	2.64366	1.88e-18
LOC122434109	2.64915	5.69e-19
LOC122431508	2.64943	3.96e-10
YPEL4	2.65159	1.81e-05
PGM2L1	2.65328	3.8e-10
PPP1R26	2.6549	1.73e-10
TRIM13	2.65513	2.23e-69
CLEC12B	2.65761	3.4e-09
CCDC65	2.65942	2.4e-08
ARHGAP6	2.65947	1.36e-19
KCNH3	2.66343	6.48e-06
VPS52	2.66383	1.39e-13
RPS19BP1	2.66913	9.78e-44
LOC122420621	2.66915	8.88e-40
LOC122420174	2.6701	1.59e-17
BBS7	2.67034	2.27e-17
PIF1	2.67263	1.65e-05
PMVK	2.6728	8.9e-26
LOC122426905	2.67308	3.26e-07
TOMM5	2.67496	1.26e-14
STK25	2.67557	1.2e-23
PAXBP1	2.67901	2.42e-11
PRDM16	2.68007	8.41e-07
VPS37C	2.68269	9.92e-24
LOC122429592	2.69285	3.08e-09
TINF2	2.6933	1.04e-26
LOC122454948	2.69353	0.000249199
LRRN4CL	2.69364	6.51e-31
LOC122425718	2.69472	8.1e-10
BTNL9	2.69705	0.0451374
TUBAL3	2.69787	1.7e-05
ADGRB3	2.69915	0.00573329
LOC122454887	2.70187	0.000148021
SUMO3	2.70325	8.14e-27
TFAP2C	2.70582	1.55e-12
TMEM18	2.70634	7.59e-49
LOC122454446	2.70679	0.00196234
LOC122420381	2.70833	2.98e-07
ZFYVE28	2.7091	2.01e-19
TSPAN9	2.71033	9.17e-14
TPM2	2.71403	1.33e-15
TOX2	2.71722	6.61e-10
ACHE	2.72167	2.01e-25
LOC122450683	2.73303	6.01e-05
PLPP5	2.73486	5.88e-28
PARD6A	2.73611	1.47e-13
WDR64	2.7365	7.07e-05
CCDC96	2.73682	8.69e-33
LOC122426618	2.73823	0.0129636
LOC122453738	2.7387	0.00477348
LOC122424250	2.74034	9.97e-07
ADM5	2.74327	2.96e-21
N6AMT1	2.74912	3.04e-12
PCYOX1L	2.7501	8.02e-22
PTCHD4	2.75238	2.56e-05
MRPL44	2.75422	2.18e-24
LOC122420942	2.75481	1.58e-15
PRKCI	2.76004	1.14e-08
LOC122425758	2.76169	0.0232711
LOC122441160	2.76173	0.0101447
TRABD2B	2.76414	1.91e-35
SYN1	2.76546	5.76e-16
LOC122425826	2.76992	6.75e-32
SLC27A2	2.77048	8.81e-33
LOC122423860	2.77208	0.000949889
TBCA	2.77339	6.85e-58
GALE	2.7761	1.42e-56
ZWILCH	2.77907	1.06e-46
YOD1	2.78212	1.94e-07
TMED1	2.7836	2.05e-24
LOC122453573	2.78831	0.0283346
RPL36AL	2.78901	1.44e-23
OBSCN	2.7892	0.000283469
BTBD6	2.7921	8.84e-27
TRAF3IP1	2.79211	3.34e-46
TBC1D30	2.79256	5.3e-14
TRMT61A	2.79263	6.23e-14
XPA	2.7979	6.49e-16
LOC122429444	2.79999	2.31e-41
SELENOM	2.8009	6.45e-11
TSSK3	2.80134	1.07e-19
TGM1	2.80429	2.19e-13
SLC26A6	2.8043	3.12e-20
LOC122433992	2.80511	0.00550829
DRD4	2.80578	3.36e-08
TIMM8B	2.80942	9.03e-15
PIK3CG	2.81166	9.11e-46
LOC122427755	2.81513	2.99e-22
SP4	2.8152	3.43e-11
GLI1	2.81898	3.46e-25
ZSWIM5	2.82041	6.13e-18
LOC122442716	2.82237	0.0279416
LOC122425053	2.82422	0.000253446
SDHAF2	2.8267	1.64e-50
SLC2A8	2.82911	3.06e-31
NXT2	2.82955	2.78e-12
SLC25A10	2.82989	4.16e-23
POLE2	2.8301	2.33e-13
LOC122424279	2.83027	2.95e-05
LOC122429481	2.83042	0.0257861
LOC122419938	2.83072	0.0306967
C27H21orf140	2.83166	3.42e-20
LOC122430122	2.83349	0.000224447
CLBA1	2.83467	2.97e-14
HEPACAM	2.83503	1.32e-05
ANGPT2	2.83516	0.000769195
LOC122427681	2.83518	3.52e-18
LOC122423272	2.83906	0.00139875
SUGT1	2.84096	5.31e-30
SENP8	2.84372	1.55e-21
YAP1	2.84499	0.00025594
[truncated: 2,451 more rows]
