# Supplementary material for: Peripheral transcriptional responses to experimental SARS-CoV-2 inoculation in North American Elk cows and calves
Source: Research Square preprint supplement (doi:10.21203/rs.3.rs-6505643/v1), 2025-05-15
Supplement: Supplementary file 5 [file 7568111679bb2d50ce4a89ee.xlsx]

## Sheet: Upregulated
Category	Term	Count	%	PValue	Genes	List Total	Pop Hits	Pop Total	Fold Enrichment	Bonferroni	Benjamini	FDR
GOTERM_BP_DIRECT	GO:0051607~defense response to virus	21	4.03071	5.45922e-23	RNASEL, RSAD2, MX2, LOC122431079, MX1, IFIT5, LOC122449458, LOC122430804, IFIT3, LOC122449451, LOC122446174, IFIT2, ISG20, LOC122422848, TLR7, LOC122431250, LOC122422854, LOC122422844, LOC122422833, APOBEC3A, APOBEC3B	385	38	15999	22.9651	2.74053e-20	2.73507e-20	2.70231e-20
KEGG_PATHWAY	ccad05162:Measles	24	4.60653	4.45662e-12	STAT1, LOC122452766, MX2, STAT2, STAT3, MX1, TNFAIP3, EIF2AK2, ADAR, FOS, IFIH1, LOC122422848, IRF3, CASP3, IRF7, TLR7, LOC122422854, BID, LOC122422844, TLR4, LOC122422833, IRF9, BCL2L1, LOC122441616	251	161	10427	6.19257	1.18993e-09	6.5142e-10	5.785e-10
KEGG_PATHWAY	ccad05169:Epstein-Barr virus infection	28	5.37428	4.86134e-12	LOC122429686, LOC122452766, LOC122429624, TNFAIP3, RELB, LOC122440005, CASP3, LOC122440883, LOC122422854, BID, LOC122422833, LYN, GADD45B, STAT1, STAT2, STAT3, TAP2, EIF2AK2, TAP1, ISG15, LOC122429593, LOC122422848, CXCL10, IRF3, IRF7, NFKBIE, LOC122422844, IRF9	251	227	10427	5.1241	1.29798e-09	6.5142e-10	5.785e-10
KEGG_PATHWAY	ccad05164:Influenza A	25	4.79846	2.77018e-11	RNASEL, LOC122452766, ADAR, IFIH1, CASP3, TNFSF10, TRIM25, LOC122422854, BID, LOC122422833, RSAD2, STAT1, MX2, STAT2, MX1, EIF2AK2, PML, LOC122422848, CXCL10, IRF3, IRF7, TLR7, LOC122422844, TLR4, IRF9	251	192	10427	5.40909	7.39636e-09	2.47469e-09	2.19767e-09
KEGG_PATHWAY	ccad04621:NOD-like receptor signaling pathway	25	4.79846	3.85542e-11	RNF31, LOC122436719, RNASEL, LOC122435269, TNFAIP3, LOC122449950, LOC122436715, LOC122436716, LOC122436717, NAMPT, LOC122422854, LOC122422833, LOC122431238, RIPK3, STAT1, STAT2, CARD6, LOC122422848, IRF3, IRF7, RBCK1, LOC122422844, TLR4, IRF9, BCL2L1	251	195	10427	5.32588	1.0294e-08	2.58313e-09	2.29397e-09
GOTERM_BP_DIRECT	GO:0045071~negative regulation of viral genome replication	9	1.72745	4.66355e-11	ISG20, LOC122422848, RNASEL, LOC122431079, LOC122430804, LOC122431250, LOC122422854, LOC122422844, LOC122422833	385	12	15999	31.1669	2.3411e-08	1.16822e-08	1.15423e-08
GOTERM_BP_DIRECT	GO:0002376~immune system process	7	1.34357	3.56022e-08	IRF3, IRF1, IRF2, IRF7, LOC122448005, IRF8, IRF9	385	10	15999	29.0891	1.78721e-05	5.94556e-06	5.87436e-06
KEGG_PATHWAY	ccad05160:Hepatitis C	20	3.83877	9.81269e-08	RNASEL, RSAD2, STAT1, LOC122452766, MX2, STAT2, STAT3, MX1, EIF2AK2, LOC122446174, LOC122422848, CXCL10, IRF3, CASP3, IRF7, LOC122422854, BID, LOC122422844, LOC122422833, IRF9	251	186	10427	4.46686	2.61995e-05	5.2596e-06	4.67084e-06
KEGG_PATHWAY	ccad05168:Herpes simplex virus 1 infection	30	5.75816	4.57755e-07	LOC122429686, RNASEL, LOC122452766, LOC122429624, CGAS, IFIH1, LOC122440005, CASP3, LOC122440883, LOC122422854, BID, LOC122422833, LOC122426418, LOC122426419, STAT1, ZNF282, STAT2, TAP2, EIF2AK2, TAP1, LOC122429593, PML, LOC122422848, IRF3, IRF7, ZNF114, LOC122422844, IRF9, BCL2L1, ZNF398	251	431	10427	2.89154	0.000122213	2.04464e-05	1.81576e-05
GOTERM_MF_DIRECT	GO:0003725~double-stranded RNA binding	9	1.72745	5.51135e-07	IFIH1, LOC122422848, LOC122452766, DHX58, EIF2AK2, ADAR, LOC122422854, LOC122422844, LOC122422833	387	32	16442	11.9491	0.000160368	0.00016038	0.000158176
KEGG_PATHWAY	ccad05170:Human immunodeficiency virus 1 infection	21	4.03071	1.15145e-06	LOC122429686, LOC122429624, TAP2, CGAS, TAP1, LOC122450226, FOS, GNG11, LOC122429593, IRF3, LOC122440005, AP1G1, CASP3, LOC122440883, PTK2B, BID, TLR4, APOBEC3A, AP1M2, BCL2L1, APOBEC3B	251	239	10427	3.65012	0.000307391	4.40843e-05	3.91495e-05
KEGG_PATHWAY	ccad04623:Cytosolic DNA-sensing pathway	12	2.30326	2.93643e-06	LOC122431238, ZBP1, CXCL10, CASP7, RIPK3, MLKL, IRF3, LOC122452766, CASP3, IRF7, CGAS, ADAR	251	80	10427	6.23127	0.00078372	9.83703e-05	8.73587e-05
KEGG_PATHWAY	ccad04217:Necroptosis	18	3.45489	3.75163e-06	RNF31, ZBP1, RIPK3, MLKL, STAT1, STAT2, STAT3, LOC122435269, TNFAIP3, EIF2AK2, TNFSF10, CHMP4A, RBCK1, BID, TLR4, IRF9, CHMP5, LOC122441616	251	193	10427	3.87437	0.00100119	0.000111715	9.92098e-05
KEGG_PATHWAY	ccad05167:Kaposi sarcoma-associated herpesvirus infection	19	3.64683	5.50905e-06	LYN, LOC122429598, LOC122429686, STAT1, LOC122429624, STAT2, STAT3, EIF2AK2, FOS, LOC122429595, GNG11, LOC122429593, IRF3, LOC122440005, CASP3, LOC122440883, IRF7, BID, IRF9	251	220	10427	3.5877	0.00146984	0.000143199	0.000127169
KEGG_PATHWAY	ccad05203:Viral carcinogenesis	19	3.64683	5.87757e-06	LYN, LOC122429686, LOC122429624, GTF2B, STAT3, EIF2AK2, LOC122429593, KAT2A, IRF3, LOC122440005, CASP3, LOC122440883, IRF7, PMAIP1, IRF9, LOC122426418, ATF4, LOC122441616, LOC122426419	251	221	10427	3.57147	0.00156808	0.000143199	0.000127169
KEGG_PATHWAY	ccad04622:RIG-I-like receptor signaling pathway	12	2.30326	7.57469e-06	IFIH1, OTUD5, CXCL10, ZNFX1, IRF3, LOC122452766, DHX58, IRF7, TRIM25, ISG15, ADAR, AZI2	251	88	10427	5.6648	0.00202041	0.000169168	0.000150231
GOTERM_BP_DIRECT	GO:0060337~type I interferon-mediated signaling pathway	5	0.959693	1.07993e-05	STAT1, STAT2, LOC122431079, LOC122430804, LOC122431250	385	7	15999	29.6827	0.00540662	0.00135261	0.00133642
KEGG_PATHWAY	ccad04668:TNF signaling pathway	13	2.4952	4.79565e-05	RIPK3, MLKL, CSF1, RHBDF2, LIF, TNFAIP3, FOS, SELE, CXCL10, CASP7, IRF1, CASP3, ATF4	251	126	10427	4.28606	0.0127231	0.000988641	0.000877973
GOTERM_MF_DIRECT	GO:0042605~peptide antigen binding	5	0.959693	8.65985e-05	LOC122429598, LOC122429686, LOC122429624, LOC122429595, LOC122429593	387	11	16442	19.3117	0.0248864	0.0120244	0.0118591
KEGG_PATHWAY	ccad05417:Lipid and atherosclerosis	18	3.45489	8.74518e-05	VAV3, LYN, NCF1, STAT3, LOC122435269, FOS, SELE, LOC122436913, LOC122436914, CASP7, IRF3, CASP3, TNFSF10, IRF7, BID, TLR4, ATF4, BCL2L1	251	246	10427	3.03965	0.0230801	0.00167408	0.00148668
KEGG_PATHWAY	ccad05133:Pertussis	10	1.91939	0.000119173	CASP7, IRF3, NOS2, IRF1, CASP3, SERPING1, IRF8, FOS, TLR4, C2	251	80	10427	5.19273	0.0313202	0.00212923	0.00189088
GOTERM_MF_DIRECT	GO:0001730~2'-5'-oligoadenylate synthetase activity	4	0.767754	0.000123963	LOC122422848, LOC122422854, LOC122422844, LOC122422833	387	5	16442	33.9886	0.0354325	0.0120244	0.0118591
GOTERM_CC_DIRECT	GO:0005737~cytoplasm	76	14.5873	0.000159674	RTP4, NCF1, ITSN1, RNF19B, TNFAIP3, ADAR, IPO4, IFIH1, UCHL1, CASP7, CASP3, TUBB1, CCRL2, DHX58, RBPMS2, SH3BGRL2, PIM3, AZI2, CMTR1, CMTR2, VAV3, DAPK2, SPATS2, VASH1, PARP9, DCK, MTURN, MOB3C, HSH2D, ESPL1, LOC122442751, CNKSR3, PSME1, CMPK2, PSME2, LAP3, SULT6B1, MYL9, OPTN, IDO1, UBA7, LOC122452766, PERM1, NEDD9, NLK, NDRG1, LOC122436913, LOC122436914, DPP3, LOC122431989, RELB, PRPSAP1, FGD3,…	341	2260	15361	1.51485	0.0238243	0.0241108	0.0241108
GOTERM_BP_DIRECT	GO:0060700~regulation of ribonuclease activity	4	0.767754	0.000259997	LOC122422848, LOC122422854, LOC122422844, LOC122422833	385	6	15999	27.7039	0.122375	0.0260517	0.0257397
KEGG_PATHWAY	ccad05163:Human cytomegalovirus infection	17	3.26296	0.000310138	LOC122429686, LOC122426699, LOC122429624, STAT3, ADCY4, TAP2, CGAS, TAP1, GNG11, LOC122429593, IRF3, LOC122440005, CASP3, LOC122440883, PTK2B, BID, ATF4	251	248	10427	2.84763	0.0794828	0.00494689	0.00439314
KEGG_PATHWAY	ccad04145:Phagosome	14	2.68714	0.000313796	LOC122429686, LOC122430259, NCF1, LOC122429624, LOC122430223, LOC122435269, TAP2, TAP1, TCIRG1, LOC122429593, LOC122440005, TUBB1, LOC122440883, TLR4	251	176	10427	3.30446	0.0803817	0.00494689	0.00439314
GOTERM_MF_DIRECT	GO:0005515~protein binding	80	15.3551	0.000344	NCF1, ITSN1, LRRK1, IFIT5, LOC122448005, IFIT3, TSKU, IFIT2, CHAF1B, HERC1, RUSC1, GRAP2, PSD4, LEPR, TRIM25, TRIM21, CMTR1, BBS4, LOC122426418, SH3D19, TLE4, VAV3, FBXW4, KCND1, UNC5A, LOC122429635, SP110, ZBTB37, SPATS2, ARAP1, ANK3, CFAP410, OSMR, WDR35, KAT2A, FCHSD2, IRF3, LOC122449901, CNKSR3, IRF7, IRF8, TRIM14, TLR7, TLR4, IRF9, SMTNL1, LOC122433328, RNASEL, SP140, NLRC5, TRANK1, NEDD9, L…	387	2320	16442	1.46503	0.0952722	0.020843	0.0205565
GOTERM_MF_DIRECT	GO:0004842~ubiquitin-protein transferase activity	8	1.53551	0.000358128	MARCHF2, RNF213, HERC1, RBCK1, LOC122438172, PML, HERC6, TRIM56	387	57	16442	5.96292	0.0989855	0.020843	0.0205565
KEGG_PATHWAY	ccad05140:Leishmaniasis	10	1.91939	0.000377286	MARCKSL1, LOC122430259, NCF1, NOS2, STAT1, LOC122430223, LOC122435269, FOS, TLR4, LOC122431989	251	93	10427	4.46686	0.095845	0.00561738	0.00498857
GOTERM_BP_DIRECT	GO:0006955~immune response	15	2.87908	0.000402699	CD274, LOC122429598, LOC122429686, LOC122426699, LOC122429624, LIF, PDCD1LG2, LOC122429595, LOC122429593, TNFSF13B, LOC122440005, CCRL2, LOC122440883, TNFSF10, TLR4	385	203	15999	3.07063	0.183065	0.0336254	0.0332227
KEGG_PATHWAY	ccad05161:Hepatitis B	14	2.68714	0.000621515	STAT1, LOC122452766, STAT2, STAT3, FOS, IFIH1, IRF3, CASP3, IRF7, PTK2B, BID, TLR4, ATF4, LOC122441616	251	189	10427	3.07717	0.15295	0.00876663	0.00778529
GOTERM_CC_DIRECT	GO:0009897~external side of plasma membrane	13	2.4952	0.00119849	CD274, LOC122429598, LOC122429686, LOC122429624, PDCD1LG2, OSMR, LOC122429595, SELE, LOC122429593, LOC122440005, LOC122440883, LEPR, LY6G6C	341	192	15361	3.05005	0.165632	0.0904859	0.0904859
GOTERM_BP_DIRECT	GO:0002486~antigen processing and presentation of endogenous peptide antigen via MHC class I via ER pathway, TAP-independent	5	0.959693	0.00169635	LOC122429598, LOC122429686, LOC122429624, LOC122429595, LOC122429593	385	22	15999	9.44451	0.573563	0.106234	0.104962
GOTERM_BP_DIRECT	GO:0002476~antigen processing and presentation of endogenous peptide antigen via MHC class Ib	5	0.959693	0.00169635	LOC122429598, LOC122429686, LOC122429624, LOC122429595, LOC122429593	385	22	15999	9.44451	0.573563	0.106234	0.104962
GOTERM_BP_DIRECT	GO:0043434~response to peptide hormone	4	0.767754	0.00196116	STAT1, STAT2, STAT3, LOC122441616	385	11	15999	15.1112	0.626736	0.109171	0.107864
KEGG_PATHWAY	ccad04612:Antigen processing and presentation	9	1.72745	0.00196749	LOC122429686, LOC122429624, LOC122440005, LOC122440883, TAP2, PSME1, TAP1, PSME2, LOC122429593	251	95	10427	3.93554	0.408939	0.0263643	0.0234131
KEGG_PATHWAY	ccad04062:Chemokine signaling pathway	13	2.4952	0.00207555	VAV3, LYN, LOC122428213, NCF1, LOC122426699, STAT1, SHC1, STAT2, STAT3, ADCY4, GNG11, CXCL10, PTK2B	251	190	10427	2.84234	0.425783	0.026488	0.0235229
GOTERM_MF_DIRECT	GO:0000981~DNA-binding transcription factor activity, RNA polymerase II-specific	35	6.71785	0.00238088	SP140, LOC122448005, RELB, FOXS1, HLX, DEAF1, HEY2, TEAD1, LOC122426418, HES4, SPDEF, LOC122441616, LOC122426419, KLF11, BATF2, STAT1, SP110, STAT2, TFE3, STAT3, ZBTB37, FOS, ETV6, IRF3, TAL1, IRF1, IRF2, IRF7, SNAI1, IRF8, TCF4, ATF3, IRF9, MXD4, ZNF398	387	866	16442	1.71709	0.500257	0.115473	0.113885
KEGG_PATHWAY	ccad05165:Human papillomavirus infection	19	3.64683	0.00250691	NOTCH3, LOC122429686, STAT1, LOC122429624, MX2, STAT2, MX1, EIF2AK2, ISG15, TCIRG1, LOC122429593, IRF3, LOC122440005, IRF1, CASP3, HEY2, LOC122440883, IRF9, HES4	251	359	10427	2.19859	0.488386	0.0305387	0.0271202
KEGG_PATHWAY	ccad03250:Viral life cycle - HIV-1	8	1.53551	0.00394989	KAT2A, MX2, MX1, LOC122450226, CHMP4A, SUPT5H, APOBEC3A, APOBEC3B	251	84	10427	3.95637	0.652402	0.0460248	0.0408727
GOTERM_BP_DIRECT	GO:0007259~cell surface receptor signaling pathway via JAK-STAT	4	0.767754	0.00410108	STAT1, STAT2, STAT3, LOC122441616	385	14	15999	11.8731	0.872925	0.205464	0.203003
GOTERM_MF_DIRECT	GO:0008270~zinc ion binding	27	5.18234	0.00454196	RNF31, MARCHF2, LOC122452766, RNF19B, TNFAIP3, LOC122450226, TTF2, DBF4B, IFIH1, RNF139, LOC122449879, DHX58, CA4, TRIM21, MORC3, DTNB, ERAP2, LOC122429635, PML, ZNFX1, LOC122449901, TRIM14, TRIM38, APOBEC3A, ZCCHC2, APOBEC3B, TRIM56	387	637	16442	1.80081	0.734123	0.188816	0.18622
KEGG_PATHWAY	ccad04064:NF-kappa B signaling pathway	9	1.72745	0.00462104	LYN, GADD45B, LOC122452766, TNFAIP3, TRIM25, TLR4, BCL2L1, TNFSF13B, RELB	251	109	10427	3.43006	0.709652	0.0516016	0.0458253
KEGG_PATHWAY	ccad04144:Endocytosis	15	2.87908	0.00535762	LOC122429686, LOC122426699, LOC122429624, ARAP1, PML, LOC122429593, EHD3, EHD4, LOC122440005, KIF5C, PSD4, LOC122440883, CHMP4A, RAB8A, CHMP5	251	269	10427	2.31646	0.761725	0.0553806	0.0491813
KEGG_PATHWAY	ccad04210:Apoptosis	11	2.11132	0.00537274	CASP7, GADD45B, CASP3, LMNA, TNFSF10, PMAIP1, FOS, BID, ATF4, BCL2L1, MCL1	251	161	10427	2.83826	0.76269	0.0553806	0.0491813
GOTERM_BP_DIRECT	GO:0035456~response to interferon-beta	3	0.575816	0.00547652	LOC122431079, LOC122430804, LOC122431250	385	5	15999	24.9335	0.936503	0.211057	0.208529
GOTERM_BP_DIRECT	GO:0046597~negative regulation of viral entry into host cell	3	0.575816	0.00547652	LOC122431079, LOC122430804, LOC122431250	385	5	15999	24.9335	0.936503	0.211057	0.208529
GOTERM_BP_DIRECT	GO:0035455~response to interferon-alpha	3	0.575816	0.00547652	LOC122431079, LOC122430804, LOC122431250	385	5	15999	24.9335	0.936503	0.211057	0.208529
KEGG_PATHWAY	ccad04380:Osteoclast differentiation	10	1.91939	0.0056647	LOC122430259, CSF1, NCF1, STAT1, LOC122430223, STAT2, ATP2A1, FOS, IRF9, RELB	251	137	10427	3.03225	0.780581	0.0562274	0.0499333
KEGG_PATHWAY	ccad04620:Toll-like receptor signaling pathway	9	1.72745	0.00604644	CXCL10, IRF3, STAT1, STAT2, IRF7, TLR7, FOS, TLR4, IRF9	251	114	10427	3.27962	0.801962	0.056424	0.0501079
KEGG_PATHWAY	ccad04514:Cell adhesion molecules	11	2.11132	0.00610558	CD274, LOC122429686, LOC122429624, LOC122440005, SDC3, LOC122440883, SIGLEC1, PDCD1LG2, F11R, SELE, LOC122429593	251	164	10427	2.78634	0.805084	0.056424	0.0501079
GOTERM_BP_DIRECT	GO:0001916~positive regulation of T cell mediated cytotoxicity	5	0.959693	0.006907	LOC122429598, LOC122429686, LOC122429624, LOC122429595, LOC122429593	385	32	15999	6.4931	0.969172	0.247172	0.244212
GOTERM_BP_DIRECT	GO:0007010~cytoskeleton organization	5	0.959693	0.0085799	FGD3, STRIP1, STRIP2, TNFAIP3, CFAP410	385	34	15999	6.11115	0.986776	0.286569	0.283137
KEGG_PATHWAY	ccad05166:Human T-cell leukemia virus 1 infection	14	2.68714	0.00873974	IL15RA, LOC122429686, LOC122429624, ADCY4, FOS, LOC122429593, RELB, KAT2A, ESPL1, LOC122440005, LOC122440883, ATF4, BCL2L1, LOC122441616	251	256	10427	2.27182	0.904035	0.078075	0.0693353
GOTERM_MF_DIRECT	GO:0005102~signaling receptor binding	8	1.53551	0.00920981	MPP1, LYN, LOC122429598, LOC122429686, LOC122429624, LOC122429595, PIK3AP1, LOC122429593	387	100	16442	3.39886	0.932287	0.335007	0.330402
GOTERM_BP_DIRECT	GO:0071222~cellular response to lipopolysaccharide	5	0.959693	0.00950733	LOC122428213, CD274, CXCL10, PDCD1LG2, NFKBIE	385	35	15999	5.93655	0.991733	0.297698	0.294133
GOTERM_BP_DIRECT	GO:0007249~canonical NF-kappaB signal transduction	4	0.767754	0.0115477	TIFA, TLR7, AZI2, RELB	385	20	15999	8.31117	0.997064	0.340319	0.336243
KEGG_PATHWAY	ccad05171:Coronavirus disease - COVID-19	24	4.60653	0.0118591	STAT1, LOC122452766, LOC122430223, MX2, STAT2, STAT3, LOC122435269, MX1, CGAS, EIF2AK2, ISG15, ADAR, FOS, C2, IFIH1, LOC122422848, CXCL10, IRF3, TLR7, LOC122422854, LOC122422844, TLR4, LOC122422833, IRF9	251	579	10427	1.72194	0.958634	0.102524	0.0910471
KEGG_PATHWAY	ccad04666:Fc gamma R-mediated phagocytosis	8	1.53551	0.0124032	LYN, VAV3, MARCKS, MARCKSL1, LOC122430259, NCF1, LOC122430223, LOC122431989	251	104	10427	3.19553	0.964291	0.103877	0.0922488
GOTERM_MF_DIRECT	GO:0031267~small GTPase binding	7	1.34357	0.0133461	CYFIP1, RIMS1, RALBP1, XPO6, RIN2, IPO4, SYTL3	387	83	16442	3.58314	0.979957	0.431525	0.425593
GOTERM_BP_DIRECT	GO:0006357~regulation of transcription by RNA polymerase II	39	7.4856	0.0139884	SP140, LOC122448005, CHD1, RELB, FOXS1, ZNF628, DEAF1, HEY2, ZNF821, TEAD1, LOC122426418, HES4, SPDEF, LOC122441616, LOC122426419, KLF11, BATF2, STAT1, SP110, STAT2, TFE3, STAT3, ZBTB37, FOS, SUPT5H, ETV6, IRF3, TAL1, IRF1, IRF2, IRF7, IRF8, TCF4, CC2D1A, ATF3, IRF9, ATF4, MXD4, ZNF398	385	1094	15999	1.48142	0.999151	0.389343	0.38468
KEGG_PATHWAY	ccad05416:Viral myocarditis	7	1.34357	0.0145256	LOC122429686, LOC122429624, LOC122440005, CASP3, LOC122440883, BID, LOC122429593	251	83	10427	3.50353	0.979895	0.117965	0.10476
KEGG_PATHWAY	ccad04662:B cell receptor signaling pathway	7	1.34357	0.0170599	LYN, VAV3, LOC122431079, LOC122430804, FOS, NFKBIE, PIK3AP1	251	86	10427	3.38131	0.989891	0.134472	0.119419
GOTERM_MF_DIRECT	GO:0003950~NAD+ ADP-ribosyltransferase activity	4	0.767754	0.0180272	PARP10, ART1, PARP9, PARP12	387	24	16442	7.08096	0.994977	0.524591	0.51738
GOTERM_BP_DIRECT	GO:0034341~response to type II interferon	3	0.575816	0.0185004	LOC122431079, LOC122430804, LOC122431250	385	9	15999	13.8519	0.999915	0.487826	0.481984
KEGG_PATHWAY	ccad04630:JAK-STAT signaling pathway	11	2.11132	0.0203463	IL15RA, STAT1, STAT2, STAT3, LEPR, LIF, OSMR, IRF9, BCL2L1, MCL1, LOC122441616	251	197	10427	2.31959	0.995866	0.15394	0.136708
KEGG_PATHWAY	ccad04215:Apoptosis - multiple species	5	0.959693	0.0206784	CASP7, CASP3, PMAIP1, BID, BCL2L1	251	44	10427	4.72066	0.996224	0.15394	0.136708
GOTERM_MF_DIRECT	GO:0000978~RNA polymerase II cis-regulatory region sequence-specific DNA binding	30	5.75816	0.0249614	LOC122448005, RELB, FOXS1, ZNF628, HEY2, ZNF821, TEAD1, HES4, LOC122441616, KLF11, BATF2, STAT1, STAT2, TFE3, STAT3, ZBTB37, FOS, IRF3, TAL1, IRF1, IRF2, IRF7, SNAI1, IRF8, TCF4, CC2D1A, ATF3, IRF9, MXD4, ZNF398	387	841	16442	1.51555	0.999361	0.618753	0.610248
KEGG_PATHWAY	ccad04650:Natural killer cell mediated cytotoxicity	9	1.72745	0.025113	VAV3, LOC122429598, LOC122430259, SHC1, CASP3, TNFSF10, PTK2B, BID, LOC122429595	251	147	10427	2.54338	0.998876	0.178203	0.158255
KEGG_PATHWAY	ccad05235:PD-L1 expression and PD-1 checkpoint pathway in cancer	7	1.34357	0.0252675	CD274, BATF2, STAT1, STAT3, FOS, NFKBIE, TLR4	251	94	10427	3.09354	0.998923	0.178203	0.158255
GOTERM_MF_DIRECT	GO:0004843~cysteine-type deubiquitinase activity	7	1.34357	0.0255156	VCPIP1, OTUD5, USP25, ATXN3, UCHL1, LOC122423793, TNFAIP3	387	96	16442	3.09792	0.999459	0.618753	0.610248
GOTERM_BP_DIRECT	GO:0030833~regulation of actin filament polymerization	4	0.767754	0.0261975	CYFIP1, FCHSD2, HCLS1, ARHGAP28	385	27	15999	6.15642	0.999998	0.656248	0.648389
KEGG_PATHWAY	ccad05330:Allograft rejection	5	0.959693	0.0294351	LOC122429686, LOC122429624, LOC122440005, LOC122440883, LOC122429593	251	49	10427	4.23896	0.999657	0.202272	0.17963
GOTERM_MF_DIRECT	GO:0070530~K63-linked polyubiquitin modification-dependent protein binding	3	0.575816	0.0310565	RNF31, TNFAIP3, OPTN	387	12	16442	10.6214	0.999897	0.695187	0.685631
GOTERM_BP_DIRECT	GO:0006952~defense response	5	0.959693	0.0316445	STAT1, STAT2, STAT3, LOC122435269, LOC122441616	385	50	15999	4.15558	1	0.727234	0.718525
GOTERM_BP_DIRECT	GO:0045087~innate immune response	7	1.34357	0.0319344	LYN, IFIH1, DHX58, TRIM14, SHFL, RELB, TRIM56	385	99	15999	2.93829	1	0.727234	0.718525
GOTERM_CC_DIRECT	GO:0005829~cytosol	27	5.18234	0.0331748	IFIT5, CGAS, ALOX12, IFIT3, IFIT2, DNAJB2, STRIP1, HK3, STRIP2, RNF213, LGALS9, LOC122422854, BID, LOC122438172, LOC122422833, USP25, PNPT1, LOC122423793, ISG15, LOC122446174, LOC122422848, PDE3A, PLIN2, PIK3AP1, NFKBIE, RIN2, LOC122422844	341	800	15361	1.52033	0.993869	1	1
GOTERM_BP_DIRECT	GO:0061512~protein localization to cilium	3	0.575816	0.0376334	TULP3, WDR35, BBS4	385	13	15999	9.58981	1	0.819366	0.809554
GOTERM_BP_DIRECT	GO:0002224~toll-like receptor signaling pathway	3	0.575816	0.0432221	UNC93B1, TLR7, TLR4	385	14	15999	8.90482	1	0.819366	0.809554
GOTERM_CC_DIRECT	GO:0031499~TRAMP complex	2	0.383877	0.0437794	TENT4A, TENT4B	341	2	15361	45.0469	0.998841	1	1
GOTERM_MF_DIRECT	GO:0004483~mRNA (nucleoside-2'-O-)-methyltransferase activity	2	0.383877	0.0464032	CMTR1, CMTR2	387	2	16442	42.4858	0.999999	0.964523	0.951265
GOTERM_BP_DIRECT	GO:0031123~RNA 3'-end processing	2	0.383877	0.0474284	TENT4A, TENT4B	385	2	15999	41.5558	1	0.819366	0.809554
GOTERM_BP_DIRECT	GO:0034154~toll-like receptor 7 signaling pathway	2	0.383877	0.0474284	UNC93B1, TLR7	385	2	15999	41.5558	1	0.819366	0.809554
GOTERM_BP_DIRECT	GO:0032728~positive regulation of interferon-beta production	2	0.383877	0.0474284	IFIH1, DHX58	385	2	15999	41.5558	1	0.819366	0.809554
GOTERM_BP_DIRECT	GO:0009615~response to virus	2	0.383877	0.0474284	IFIH1, DHX58	385	2	15999	41.5558	1	0.819366	0.809554
GOTERM_BP_DIRECT	GO:2000051~negative regulation of non-canonical Wnt signaling pathway	2	0.383877	0.0474284	RNF213, LOC122438172	385	2	15999	41.5558	1	0.819366	0.809554
KEGG_PATHWAY	ccad04940:Type I diabetes mellitus	5	0.959693	0.0499936	LOC122429686, LOC122429624, LOC122440005, LOC122440883, LOC122429593	251	58	10427	3.58119	0.999999	0.334957	0.297462
KEGG_PATHWAY	ccad05320:Autoimmune thyroid disease	5	0.959693	0.0526618	LOC122429686, LOC122429624, LOC122440005, LOC122440883, LOC122429593	251	59	10427	3.52049	0.999999	0.344229	0.305695
GOTERM_BP_DIRECT	GO:0016477~cell migration	6	1.15163	0.0536264	VAV3, AXL, SDC3, NEDD9, TNFAIP3, NDEL1	385	85	15999	2.93335	1	0.883706	0.873123
GOTERM_BP_DIRECT	GO:0042127~regulation of cell population proliferation	4	0.767754	0.0546804	STAT1, STAT2, STAT3, LOC122441616	385	36	15999	4.61732	1	0.883706	0.873123
GOTERM_CC_DIRECT	GO:0005634~nucleus	73	14.0115	0.0557692	RERE, GTF2B, CBY1, CGAS, LOC122448005, TNFAIP3, IFI35, CHD1, IPO4, PTMS, NYNRIN, CHAF1B, HEY2, LGALS9, CMTR1, CMTR2, LOC122426418, LOC122426419, TLE4, ZBP1, BATF2, MORC3, KHNYN, SP110, DAPK2, TFE3, FOS, PARP9, ETV6, MOB3C, KAT2A, IRF3, ESPL1, EWSR1, IRF1, LOC122442751, IRF2, XRN2, IRF7, IRF8, OPTN, ATF3, IRF9, ATF4, ZNF398, PERM1, SP140, SYNPO2, TACSTD2, DBF4B, NLK, LOC122434938, ATXN3, SERTAD1, …	341	2723	15361	1.20765	0.999827	1	1
GOTERM_MF_DIRECT	GO:0003727~single-stranded RNA binding	3	0.575816	0.0592759	IFIH1, LOC122452766, DHX58	387	17	16442	7.49749	1	1	0.989655
GOTERM_CC_DIRECT	GO:0071797~LUBAC complex	2	0.383877	0.0649472	RNF31, RBCK1	341	3	15361	30.0313	0.999961	1	1
GOTERM_CC_DIRECT	GO:0005654~nucleoplasm	8	1.53551	0.0653323	LOC122422848, PSME1, PSME2, LOC122422854, LOC122422844, LOC122422833, PML, TRIM56	341	160	15361	2.25235	0.999963	1	1
GOTERM_BP_DIRECT	GO:0008630~intrinsic apoptotic signaling pathway in response to DNA damage	3	0.575816	0.0682722	PML, BCL2L1, MCL1	385	18	15999	6.92597	1	0.978264	0.966548
KEGG_PATHWAY	ccad04330:Notch signaling pathway	5	0.959693	0.0702582	TLE4, NOTCH3, KAT2A, DTX3L, HEY2	251	65	10427	3.19553	1	0.437888	0.388871
KEGG_PATHWAY	ccad05332:Graft-versus-host disease	5	0.959693	0.0702582	LOC122429686, LOC122429624, LOC122440005, LOC122440883, LOC122429593	251	65	10427	3.19553	1	0.437888	0.388871
GOTERM_BP_DIRECT	GO:0045869~negative regulation of single stranded viral RNA replication via double stranded DNA intermediate	2	0.383877	0.0702944	APOBEC3A, APOBEC3B	385	3	15999	27.7039	1	0.978264	0.966548
GOTERM_BP_DIRECT	GO:0070383~DNA cytosine deamination	2	0.383877	0.0702944	APOBEC3A, APOBEC3B	385	3	15999	27.7039	1	0.978264	0.966548
GOTERM_BP_DIRECT	GO:0097039~protein linear polyubiquitination	2	0.383877	0.0702944	RNF31, RBCK1	385	3	15999	27.7039	1	0.978264	0.966548
GOTERM_BP_DIRECT	GO:0015833~peptide transport	2	0.383877	0.0702944	TAP2, TAP1	385	3	15999	27.7039	1	0.978264	0.966548
GOTERM_MF_DIRECT	GO:0004672~protein kinase activity	7	1.34357	0.0743373	PXK, RNASEL, RIPK3, MLKL, PRAG1, LRRK1, EIF2AK2	387	125	16442	2.3792	1	1	0.989655
GOTERM_MF_DIRECT	GO:0005516~calmodulin binding	5	0.959693	0.0756135	MARCKS, MARCKSL1, NOS2, CALD1, LOC122431989	387	68	16442	3.12396	1	1	0.989655
GOTERM_BP_DIRECT	GO:0006511~ubiquitin-dependent protein catabolic process	7	1.34357	0.0759718	HERC5, UCHL1, RNF213, RNF114, RNF19B, ISG15, LOC122438172	385	123	15999	2.36497	1	1	0.99
GOTERM_CC_DIRECT	GO:0016605~PML body	3	0.575816	0.0778342	MORC3, PML, N4BP1	341	21	15361	6.43527	0.999995	1	1
KEGG_PATHWAY	ccad04917:Prolactin signaling pathway	6	1.15163	0.0806079	STAT1, SHC1, IRF1, STAT3, FOS, LOC122441616	251	96	10427	2.59636	1	0.489484	0.434691
KEGG_PATHWAY	ccad04935:Growth hormone synthesis, secretion and action	7	1.34357	0.0823573	STAT1, SHC1, STAT3, ADCY4, FOS, ATF4, LOC122441616	251	126	10427	2.30788	1	0.489484	0.434691
KEGG_PATHWAY	ccad05200:Pathways in cancer	20	3.83877	0.0840159	IL15RA, NOTCH3, RALBP1, NOS2, GADD45B, STAT1, DAPK2, STAT2, STAT3, ADCY4, FOS, GNG11, PML, CASP7, CASP3, HEY2, PMAIP1, BID, BCL2L1, LOC122441616	251	564	10427	1.47311	1	0.489484	0.434691
GOTERM_CC_DIRECT	GO:0097708~intracellular vesicle	2	0.383877	0.0856476	EHD4, ITSN1	341	4	15361	22.5235	0.999999	1	1
GOTERM_BP_DIRECT	GO:0006915~apoptotic process	4	0.767754	0.0883933	CASP7, CASP3, PMAIP1, XAF1	385	44	15999	3.7778	1	1	0.99
GOTERM_MF_DIRECT	GO:0003779~actin binding	6	1.15163	0.089271	PXK, CALD1, TGFB1I1, SYNPO2, EVL, PARVB	387	101	16442	2.52391	1	1	0.989655
KEGG_PATHWAY	ccad05022:Pathways of neurodegeneration - multiple diseases	20	3.83877	0.0894737	UBA7, CSF1, NOS2, FUS, GPX3, LOC122435269, ATP2A1, UBE2L6, ATXN3, UCHL1, CASP7, KIF5C, CASP3, TUBB1, LOC122421478, BID, RAB8A, OPTN, ATF4, BCL2L1	251	567	10427	1.46532	1	0.510191	0.45308
GOTERM_MF_DIRECT	GO:0046592~polyamine oxidase activity	2	0.383877	0.0906584	IL4I1, SMOX	387	4	16442	21.2429	1	1	0.989655
GOTERM_MF_DIRECT	GO:0015421~ABC-type oligopeptide transporter activity	2	0.383877	0.0906584	TAP2, TAP1	387	4	16442	21.2429	1	1	0.989655
GOTERM_BP_DIRECT	GO:0060397~growth hormone receptor signaling pathway via JAK-STAT	2	0.383877	0.0926129	STAT3, LOC122441616	385	4	15999	20.7779	1	1	0.99
GOTERM_BP_DIRECT	GO:0150007~clathrin-dependent synaptic vesicle endocytosis	2	0.383877	0.0926129	EHD4, ITSN1	385	4	15999	20.7779	1	1	0.99
GOTERM_BP_DIRECT	GO:0090557~establishment of endothelial intestinal barrier	2	0.383877	0.0926129	F11R, TJP2	385	4	15999	20.7779	1	1	0.99
GOTERM_BP_DIRECT	GO:0007417~central nervous system development	4	0.767754	0.0931031	MARCKS, MARCKSL1, APLP2, LOC122431989	385	45	15999	3.69385	1	1	0.99
GOTERM_MF_DIRECT	GO:0046872~metal ion binding	9	1.72745	0.0955508	ZFYVE28, FGD3, ZFYVE26, RNF213, LOC122438172, LOC122435197, PARP12, TOPORS, IDO1	387	198	16442	1.93117	1	1	0.989655
GOTERM_CC_DIRECT	GO:0042734~presynaptic membrane	3	0.575816	0.098023	RIMS1, EHD4, ITSN1	341	24	15361	5.63087	1	1	1
GOTERM_MF_DIRECT	GO:0005524~ATP binding	35	6.71785	0.0981797	SLC22A4, RNASEL, PXK, PRAG1, DHX8, LOC122452766, LRRK1, TRANK1, ATP2A1, TTF2, NLK, CHD1, IFIH1, HK3, KIF5C, DHX58, PTK2B, DHX38, PIM3, ABCD1, LYN, TOR3A, RIPK3, MLKL, DAPK2, TWNK, TAP2, EIF2AK2, TAP1, DCK, WARS1, FES, AXL, PRKD2, ALPK1	387	1152	16442	1.2908	1	1	0.989655
GOTERM_MF_DIRECT	GO:0005085~guanyl-nucleotide exchange factor activity	8	1.53551	0.099018	PLEKHG3, FGD3, VAV3, RASGEF1B, DOCK8, PSD4, ITSN1, RIN2	387	167	16442	2.03525	1	1	0.989655

## Sheet: Downregulated
Category	Term	Count	%	PValue	Genes	List Total	Pop Hits	Pop Total	Fold Enrichment	Bonferroni	Benjamini	FDR
GOTERM_CC_DIRECT	GO:0005783~endoplasmic reticulum	10	5.68182	0.000328926	EDEM3, PPP1R15B, TLCD3A, APH1B, TMX3, TMEM30A, FAF2, ZDHHC23, MGST2, SLC27A2	107	315	15361	4.55748	0.022444	0.0226959	0.0226959
KEGG_PATHWAY	ccad00514:Other types of O-glycan biosynthesis	5	2.84091	0.000490026	LOC122427243, GALNT1, C1GALT1, GXYLT2, OGT	83	47	10427	13.3645	0.0830991	0.0872246	0.0872246
KEGG_PATHWAY	ccad00230:Purine metabolism	6	3.40909	0.00455979	NUDT9, LACC1, PDE6A, ADSS2, PAPSS2, PAPSS1	83	138	10427	5.46202	0.554665	0.405822	0.405822
GOTERM_CC_DIRECT	GO:0005794~Golgi apparatus	7	3.97727	0.0054141	PREPL, LOC122427243, TMEM30A, LOC122452562, GALNT1, ZDHHC23, TMEM165	107	232	15361	4.33157	0.312428	0.186787	0.186787
KEGG_PATHWAY	ccad00532:Glycosaminoglycan biosynthesis - chondroitin sulfate / dermatan sulfate	3	1.70455	0.0127447	CHST11, DSEL, XYLT1	83	22	10427	17.1309	0.896719	0.756183	0.756183
GOTERM_BP_DIRECT	GO:0000103~sulfate assimilation	2	1.13636	0.0151933	PAPSS2, PAPSS1	123	2	15999	130.073	0.944622	1	1
GOTERM_BP_DIRECT	GO:0050428~3'-phosphoadenosine 5'-phosphosulfate biosynthetic process	2	1.13636	0.0151933	PAPSS2, PAPSS1	123	2	15999	130.073	0.944622	1	1
GOTERM_MF_DIRECT	GO:0004781~sulfate adenylyltransferase (ATP) activity	2	1.13636	0.0157511	PAPSS2, PAPSS1	131	2	16442	125.511	0.907586	1	1
GOTERM_MF_DIRECT	GO:0004020~adenylylsulfate kinase activity	2	1.13636	0.0157511	PAPSS2, PAPSS1	131	2	16442	125.511	0.907586	1	1
KEGG_PATHWAY	ccad00512:Mucin type O-glycan biosynthesis	3	1.70455	0.035777	LOC122427243, GALNT1, C1GALT1	83	38	10427	9.91788	0.998417	1	1
GOTERM_MF_DIRECT	GO:0005515~protein binding	27	15.3409	0.0396987	WDR26, ZBTB47, INTU, PTPRJ, SIPA1L2, IL22RA2, ATXN1, RMND5A, SH3PXD2B, PDE6A, PLXNC1, PDZD8, KLHDC2, ZBTB18, ANKRD22, SUSD1, SAMD4A, ZBTB34, RANBP6, FBXO30, SNX18, NLRP12, AGO4, KCTD12, OGT, FKBP5, IFNAR1	131	2320	16442	1.46069	0.997703	1	1
GOTERM_CC_DIRECT	GO:0005890~sodium:potassium-exchanging ATPase complex	2	1.13636	0.0407023	ATP1B3, ATP1B1	107	6	15361	47.8536	0.943143	0.81635	0.81635
KEGG_PATHWAY	ccad05206:MicroRNAs in cancer	5	2.84091	0.0447566	RPS6KA5, PLAU, TPM1, MMP9, CD44	83	170	10427	3.6949	0.999698	1	1
GOTERM_CC_DIRECT	GO:0034657~GID complex	2	1.13636	0.0473246	WDR26, RMND5A	107	7	15361	41.0174	0.964747	0.81635	0.81635
KEGG_PATHWAY	ccad01100:Metabolic pathways	21	11.9318	0.0528032	AGPAT5, PDXK, LOC122427243, GALNT1, C1GALT1, XYLT1, MGST2, PAPSS2, PAPSS1, NUDT9, LACC1, DSEL, CAT, TBXAS1, ME1, ATP6V0A2, LOC122419783, PDE6A, ADSS2, LOC122434053, LBR	83	1764	10427	1.49555	0.999932	1	1
GOTERM_BP_DIRECT	GO:0051560~mitochondrial calcium ion homeostasis	2	1.13636	0.0594129	PDZD8, MCU	123	8	15999	32.5183	0.999991	1	1
KEGG_PATHWAY	ccad04621:NOD-like receptor signaling pathway	5	2.84091	0.0673663	NLRP12, NEK7, PKN2, MCU, IFNAR1	83	195	10427	3.22119	0.999996	1	1
GOTERM_BP_DIRECT	GO:0010951~negative regulation of endopeptidase activity	3	1.70455	0.0680438	SERPINA1, TIMP2, SERPINB7	123	56	15999	6.96821	0.999998	1	1
KEGG_PATHWAY	ccad05200:Pathways in cancer	9	5.11364	0.074899	FRAT2, RPS6KA5, CTBP2, HGF, GNG7, MGST2, MMP9, BBC3, IFNAR1	83	564	10427	2.00468	0.999999	1	1
KEGG_PATHWAY	ccad00920:Sulfur metabolism	2	1.13636	0.0759481	PAPSS2, PAPSS1	83	10	10427	25.1253	0.999999	1	1
GOTERM_BP_DIRECT	GO:0030007~intracellular potassium ion homeostasis	2	1.13636	0.0807785	ATP1B3, ATP1B1	123	11	15999	23.6497	1	1	1
GOTERM_BP_DIRECT	GO:0006883~intracellular sodium ion homeostasis	2	1.13636	0.0807785	ATP1B3, ATP1B1	123	11	15999	23.6497	1	1	1
GOTERM_BP_DIRECT	GO:0036376~sodium ion export across plasma membrane	2	1.13636	0.0807785	ATP1B3, ATP1B1	123	11	15999	23.6497	1	1	1
KEGG_PATHWAY	ccad04330:Notch signaling pathway	3	1.70455	0.0925375	APH1B, ATXN1, CTBP2	83	65	10427	5.79815	1	1	1
