# Supplementary material for: Peripheral transcriptional responses to experimental SARS-CoV-2 inoculation in North American Elk cows and calves
Source: Research Square preprint supplement (doi:10.21203/rs.3.rs-6505643/v1), 2025-05-15
Supplement: Supplementary file 6 [file 963b50143e39be14da38b7b0.xlsx]

## Sheet: Suppl_table4_MF,BP, KEGG_UpDEG_
Category	Term	Count	%	PValue	Genes	List Total	Pop Hits	Pop Total	Fold Enrichment	Bonferroni	Benjamini	FDR
GOTERM_BP_DIRECT	GO:0051607~defense response to virus	12	2.09424	2.45343e-09	ISG20, LOC122422848, RSAD2, MX2, LOC122431079, MX1, LOC122422854, LOC122422844, LOC122422833, LOC122446174, APOBEC3B, IFIT2	424	38	15999	11.9158	1.44016e-06	1.43771e-06	1.43771e-06
KEGG_PATHWAY	ccad05162:Measles	19	3.31588	2.27488e-07	STAT1, MX2, STAT2, MX1, ADAR, FOS, BBC3, LOC122422848, IRAK1, IL2RA, IRF7, BAX, LOC122422854, BID, IKBKE, LOC122422844, LOC122422833, IRF9, BCL2L1	276	161	10427	4.45839	6.80166e-05	6.82464e-05	6.57441e-05
KEGG_PATHWAY	ccad04621:NOD-like receptor signaling pathway	20	3.4904	9.02291e-07	RNF31, GSDMD, RIPK3, STAT1, STAT2, CARD9, MEFV, LOC122436717, LOC122422848, PLCB3, CASP1, IRF7, RBCK1, LOC122422854, IKBKE, LOC122422844, LOC122422833, IRF9, BCL2L1, CTSB	276	195	10427	3.87477	0.000269749	0.000135344	0.000130381
KEGG_PATHWAY	ccad04142:Lysosome	16	2.79232	4.82074e-06	ARSA, IDUA, CTSZ, CTNS, NAGA, LOC122425091, TCIRG1, MCOLN1, GALNS, GGA1, CLN3, NAGLU, AP1G2, SMPD1, ACP2, CTSB	276	142	10427	4.25679	0.00144037	0.000482074	0.000464398
GOTERM_BP_DIRECT	GO:0045071~negative regulation of viral genome replication	6	1.04712	8.57253e-06	ISG20, LOC122422848, LOC122431079, LOC122422854, LOC122422844, LOC122422833	424	12	15999	18.8667	0.00501946	0.00251175	0.00251175
KEGG_PATHWAY	ccad05169:Epstein-Barr virus infection	19	3.31588	3.0991e-05	GADD45B, STAT1, STAT2, TAP2, ISG15, RELB, NFKB2, PSMD8, LOC122422848, IRAK1, IRF7, BAX, E2F2, LOC122422854, BID, IKBKE, LOC122422844, LOC122422833, IRF9	276	227	10427	3.16212	0.00922365	0.00192183	0.00185136
KEGG_PATHWAY	ccad05160:Hepatitis C	17	2.96684	3.20304e-05	RSAD2, STAT1, MX2, STAT2, MX1, NR1H3, LOC122446174, LOC122422848, IRF7, BAX, E2F2, LOC122422854, BID, IKBKE, LOC122422844, LOC122422833, IRF9	276	186	10427	3.45292	0.00953154	0.00192183	0.00185136
KEGG_PATHWAY	ccad05164:Influenza A	17	2.96684	4.72445e-05	RSAD2, STAT1, MX2, STAT2, MX1, ADAR, PML, LOC122422848, CASP1, IRF7, BAX, LOC122422854, BID, IKBKE, LOC122422844, LOC122422833, IRF9	276	192	10427	3.34501	0.0140271	0.00236223	0.00227561
GOTERM_CC_DIRECT	GO:0005829~cytosol	39	6.80628	6.40382e-05	PFKFB4, SHMT2, ARHGEF10L, NUBP1, CNDP2, IFIT2, PSMD8, HK3, RNF213, NDOR1, IPO9, NUDT17, LGALS9, LOC122422854, BID, ARMH3, LOC122422833, OSBPL7, VPS9D1, TPI1, LOC122423793, MAP1S, MID1IP1, OSBPL2, AKR1A1, ISG15, AMPD2, ATOX1, LOC122446174, LOC122437619, LOC122422848, FMNL1, MVD, PLIN2, RIN3, LOC122422844, TELO2, ADA, GALK1	375	800	15361	1.99693	0.0119674	0.0120392	0.0119752
GOTERM_BP_DIRECT	GO:0002376~immune system process	5	0.8726	8.91507e-05	IRF1, IRF7, IRF8, IRF5, IRF9	424	10	15999	18.8667	0.050988	0.0174141	0.0174141
GOTERM_MF_DIRECT	GO:0001730~2'-5'-oligoadenylate synthetase activity	4	0.69808	0.000190358	LOC122422848, LOC122422854, LOC122422844, LOC122422833	447	5	16442	29.4264	0.067483	0.0698612	0.0698612
GOTERM_BP_DIRECT	GO:0060700~regulation of ribonuclease activity	4	0.69808	0.000345851	LOC122422848, LOC122422854, LOC122422844, LOC122422833	424	6	15999	25.1557	0.183762	0.0506671	0.0506671
KEGG_PATHWAY	ccad01100:Metabolic pathways	68	11.8674	0.00090318	DPAGT1, ACADVL, ALAS1, MTMR14, HEXD, INPPL1, TCIRG1, PIGV, CNDP2, THTPA, HK3, IL4I1, NAGLU, SMPD1, GMPPA, ACP2, ACAA1, ACADS, BCKDHA, ARSA, SDS, TPI1, CHPF2, GPX3, SPHK2, OXSM, SPHK1, AKR1A1, ALG12, AMPD2, SIRT6, BPGM, ASRGL1, LOC122437619, PHOSPHO1, PLCB3, PKM, TST, DGKQ, ALDH1A1, CMPK2, MVD, LAP3, ALDH9A1, PFKFB4, IDUA, SHMT2, GMPR2, PLD4, PPOX, PLA2G7, PLD3, LOC122436914, HMGCL, AMDHD2, HSD3B7…	276	1764	10427	1.45633	0.236752	0.0387077	0.0372884
GOTERM_MF_DIRECT	GO:0003824~catalytic activity	5	0.8726	0.00120807	RSAD2, PGGHG, ABHD8, PLD4, PLD3	447	18	16442	10.2175	0.358298	0.193193	0.193193
GOTERM_MF_DIRECT	GO:0003725~double-stranded RNA binding	6	1.04712	0.00157924	LOC122422848, DHX58, ADAR, LOC122422854, LOC122422844, LOC122422833	447	32	16442	6.89681	0.440123	0.193193	0.193193
KEGG_PATHWAY	ccad04666:Fc gamma R-mediated phagocytosis	10	1.7452	0.00166999	HCK, NCF1, SPHK2, LOC122430223, LIMK2, SPHK1, ASAP3, INPPL1, GAB2, VAV1	276	104	10427	3.63259	0.393314	0.0599169	0.0577199
KEGG_PATHWAY	ccad04217:Necroptosis	14	2.44328	0.00179751	RNF31, ZBP1, RIPK3, STAT1, STAT2, LOC122442443, SMPD1, CASP1, BAX, STAT6, RBCK1, BID, IRF9, FTL	276	193	10427	2.74044	0.416049	0.0599169	0.0577199
GOTERM_CC_DIRECT	GO:0005737~cytoplasm	77	13.438	0.00180779	CRTC2, NCF1, ADAR, ARRB2, CAPN15, ARHGAP4, NTMT1, CCRL2, GMPPA, DHX58, LOC122441498, SH3BGRL2, IKBKE, CMTR1, SH3GLB2, DUSP2, SPHK2, SPHK1, SPATS2, VASH1, PARP9, VAV1, MTURN, RNF123, HSH2D, PKM, MAPKAPK3, AKT1S1, CRY2, CMPK2, TARS2, LAP3, MYL9, LLGL1, OPTN, FTL, LRRC14, SASH3, UBA7, SHMT2, ASAP3, NDRG2, NDRG1, OAZ2, LOC122436914, RELB, FGD2, RECQL4, FGD3, KLC4, NUAK2, IRAK1, LOC122442443, EIF4EBP1…	375	2260	15361	1.39563	0.288352	0.169932	0.169028
KEGG_PATHWAY	ccad04625:C-type lectin receptor signaling pathway	10	1.7452	0.00203529	STAT1, IRF1, STAT2, CARD9, BCL3, CASP1, IKBKE, IRF9, NFKB2, RELB	276	107	10427	3.53075	0.456199	0.0610586	0.0588198
GOTERM_MF_DIRECT	GO:0005096~GTPase activator activity	11	1.91972	0.00287092	ARHGAP22, RALBP1, RASA4B, STARD8, ASAP3, PREB, ARAP1, TBC1D17, ADAP1, GIT1, LLGL1	447	130	16442	3.11241	0.651858	0.263407	0.263407
GOTERM_CC_DIRECT	GO:0005765~lysosomal membrane	7	1.22164	0.00422679	CLCN7, SLC48A1, PIP4P1, PSEN2, GPR137, CTNS, MCOLN1	375	63	15361	4.55141	0.549015	0.264879	0.26347
KEGG_PATHWAY	ccad00010:Glycolysis / Gluconeogenesis	8	1.39616	0.00440214	HK3, PKM, G6PC3, TPI1, AKR1A1, GALM, BPGM, ALDH9A1	276	78	10427	3.87477	0.732636	0.120058	0.115656
KEGG_PATHWAY	ccad04623:Cytosolic DNA-sensing pathway	8	1.39616	0.00506343	GSDMD, ZBP1, RIPK3, CASP1, IRF7, ADAR, MEFV, IKBKE	276	80	10427	3.7779	0.780809	0.126586	0.121944
KEGG_PATHWAY	ccad00564:Glycerophospholipid metabolism	9	1.57068	0.00686374	ACHE, PHOSPHO1, CHKB, DGKQ, MBOAT7, LPCAT3, PLD4, LPIN3, PLD3	276	106	10427	3.20765	0.872461	0.158394	0.152586
GOTERM_CC_DIRECT	GO:0043231~intracellular membrane-bounded organelle	10	1.7452	0.00991745	CLCN7, OSBPL7, SPHK2, ABCA3, SPHK1, OSBPL2, EPHX3, ADAP1, LOC122455194, LOC122436914	375	147	15361	2.78658	0.846459	0.46612	0.463641
KEGG_PATHWAY	ccad04210:Apoptosis	11	1.91972	0.0102248	GADD45B, LOC122426544, LMNA, CTSZ, BAX, FOS, BID, LOC122455194, BCL2L1, BBC3, CTSB	276	161	10427	2.58117	0.953716	0.205919	0.198369
KEGG_PATHWAY	ccad04380:Osteoclast differentiation	10	1.7452	0.0102959	SPI1, NCF1, STAT1, LOC122430223, STAT2, GAB2, FOS, IRF9, NFKB2, RELB	276	137	10427	2.75759	0.9547	0.205919	0.198369
KEGG_PATHWAY	ccad04062:Chemokine signaling pathway	12	2.09424	0.0119679	FGR, HCK, PLCB3, NCF1, STAT1, LOC122428204, CXCR3, STAT2, GNB2, ARRB2, GNG11, VAV1	276	190	10427	2.38604	0.972676	0.224398	0.21617
GOTERM_CC_DIRECT	GO:0005764~lysosome	7	1.22164	0.0132714	CLN3, UNC93B1, SMPD1, CTSZ, ACP2, RAB7B, CTSB	375	80	15361	3.58423	0.918871	0.499003	0.496349
GOTERM_BP_DIRECT	GO:0060337~type I interferon-mediated signaling pathway	3	0.52356	0.0134106	STAT1, STAT2, LOC122431079	424	7	15999	16.1715	0.999639	1	1
KEGG_PATHWAY	ccad00280:Valine, leucine and isoleucine degradation	6	1.04712	0.0135744	BCKDHA, HMGCL, IL4I1, ACAA1, ACADS, ALDH9A1	276	54	10427	4.19767	0.983203	0.239549	0.230765
KEGG_PATHWAY	ccad04148:Efferocytosis	11	1.91972	0.0151357	XKR8, DUSP2, P2RY6, LRP1, MEGF11, SPHK2, SPHK1, CASP1, NR1H3, RAB7B, SCARF1	276	171	10427	2.43023	0.98954	0.252262	0.243013
KEGG_PATHWAY	ccad00531:Glycosaminoglycan degradation	4	0.69808	0.0169805	GALNS, NAGLU, IDUA, LOC122425091	276	21	10427	7.196	0.994029	0.268113	0.258282
GOTERM_MF_DIRECT	GO:0005515~protein binding	80	13.9616	0.0178461	LOC122432972, NCF1, MEGF11, SOWAHD, INPPL1, ILK, WDR83, ARHGEF10L, PTPN23, TSKU, ARHGAP4, IFIT2, RUSC1, GRAP2, MLST8, EMILIN2, TNS3, TRIM21, CMTR1, GIT1, SNTA1, FBXW4, SH3GLB2, LRRC45, FBXW5, LOC122429635, SPATS2, ARAP1, CFAP410, VAV1, RNF123, FAM234A, TEP1, GORASP1, IRF7, IRF8, IRF5, PREB, FKBP6, IRF9, PPP1R37, SASH3, LOC122433328, LRP1, IDUA, KLHL17, ASAP3, NLRC5, TRANK1, SNX33, WDR24, ARHGAP21…	447	2320	16442	1.26838	0.998651	1	1
GOTERM_MF_DIRECT	GO:0004842~ubiquitin-protein transferase activity	6	1.04712	0.0189366	RNF123, MARCHF2, RNF213, RBCK1, PML, HERC6	447	57	16442	3.87189	0.999103	1	1
KEGG_PATHWAY	ccad05168:Herpes simplex virus 1 infection	20	3.4904	0.0197902	ZNF133, STAT1, ZNF282, STAT2, CARD9, TAP2, PML, LOC122422848, IRAK1, ZNF768, EIF4EBP1, IRF7, BAX, LOC122422854, BID, IKBKE, LOC122422844, LOC122422833, IRF9, BCL2L1	276	431	10427	1.75309	0.997463	0.296853	0.285968
GOTERM_BP_DIRECT	GO:0030036~actin cytoskeleton organization	7	1.22164	0.0213898	INF2, TGFB1I1, STARD8, LIMK2, PLEK, ARHGEF10L, PDLIM7	424	82	15999	3.22115	0.999997	1	1
GOTERM_BP_DIRECT	GO:0006919~activation of cysteine-type endopeptidase activity involved in apoptotic process	3	0.52356	0.0221995	HIP1R, BID, BBC3	424	9	15999	12.5778	0.999998	1	1
GOTERM_BP_DIRECT	GO:0034097~response to cytokine	3	0.52356	0.0221995	MAPKAPK3, NFKB2, RELB	424	9	15999	12.5778	0.999998	1	1
GOTERM_BP_DIRECT	GO:0007229~integrin-mediated signaling pathway	5	0.8726	0.0244473	FGR, MPIG6B, ITGA2B, ILK, FERMT3	424	42	15999	4.49208	1	1	1
GOTERM_BP_DIRECT	GO:0006096~glycolytic process	4	0.69808	0.0246032	HK3, PKM, TPI1, BPGM	424	24	15999	6.28892	1	1	1
GOTERM_MF_DIRECT	GO:0031267~small GTPase binding	7	1.22164	0.0252014	GGA1, RALBP1, FMNL1, INF2, VPS9D1, IPO9, RIN3	447	83	16442	3.10218	0.999915	1	1
GOTERM_MF_DIRECT	GO:0003950~NAD+ ADP-ribosyltransferase activity	4	0.69808	0.0262942	PARP10, LOC122449425, PARP9, PARP12	447	24	16442	6.1305	0.999943	1	1
KEGG_PATHWAY	ccad04620:Toll-like receptor signaling pathway	8	1.39616	0.0310248	IRAK1, STAT1, STAT2, IRF7, IRF5, FOS, IKBKE, IRF9	276	114	10427	2.65116	0.999919	0.430416	0.414634
KEGG_PATHWAY	ccad05167:Kaposi sarcoma-associated herpesvirus infection	12	2.09424	0.0315638	HCK, STAT1, STAT2, GNB2, IRF7, BAX, E2F2, FOS, BID, GNG11, IKBKE, IRF9	276	220	10427	2.06067	0.999932	0.430416	0.414634
GOTERM_BP_DIRECT	GO:0043434~response to peptide hormone	3	0.52356	0.0327557	STAT1, STAT2, STAT6	424	11	15999	10.291	1	1	1
GOTERM_BP_DIRECT	GO:0016311~dephosphorylation	4	0.69808	0.0335564	THTPA, MTMR14, ACP2, TNS3	424	27	15999	5.59015	1	1	1
GOTERM_CC_DIRECT	GO:0019005~SCF ubiquitin ligase complex	5	0.8726	0.0352419	SPSB3, FBXW4, SPSB2, FBXW5, FBXL5	375	51	15361	4.01595	0.998823	0.84633	0.841828
GOTERM_CC_DIRECT	GO:0001725~stress fiber	4	0.69808	0.0357701	TGFB1I1, ILK, MYL9, PDLIM7	375	30	15361	5.46169	0.998938	0.84633	0.841828
GOTERM_CC_DIRECT	GO:0005789~endoplasmic reticulum membrane	12	2.09424	0.038173	ABHD12, SLC37A2, PGAP2, RSAD2, ATP13A1, TAP2, ALG12, RRBP1, PREB, PIGV, LMF2, YIF1A	375	245	15361	2.00633	0.999336	0.84633	0.841828
GOTERM_MF_DIRECT	GO:0005085~guanyl-nucleotide exchange factor activity	10	1.7452	0.0386022	PLEKHG3, FGD3, VPS9D1, CYTH4, HPS1, ARHGEF10L, RIN3, PREB, VAV1, FGD2	447	167	16442	2.20257	0.999999	1	1
GOTERM_BP_DIRECT	GO:0033554~cellular response to stress	3	0.52356	0.038631	MAP3K6, NFKB2, RELB	424	12	15999	9.43337	1	1	1
GOTERM_CC_DIRECT	GO:0005739~mitochondrion	21	3.66492	0.0405158	ALAS1, RSAD2, TWNK, MRPS18B, IFI6, G0S2, BBC3, UNG, BCKDK, LOC122419678, HK3, SARS2, TST, FDXR, TUT1, CMPK2, PMPCA, TARS2, BID, ACADS, POLG	375	538	15361	1.59891	0.99958	0.84633	0.841828
GOTERM_MF_DIRECT	GO:0004407~histone deacetylase activity	3	0.52356	0.0470007	HDAC5, HDAC11, HDAC7	447	13	16442	8.48838	1	1	1
GOTERM_MF_DIRECT	GO:0016791~phosphatase activity	3	0.52356	0.0470007	PHOSPHO1, INPPL1, TNS3	447	13	16442	8.48838	1	1	1
KEGG_PATHWAY	ccad00052:Galactose metabolism	4	0.69808	0.0473778	HK3, G6PC3, GALM, GALK1	276	31	10427	4.87471	1	0.617971	0.595312
GOTERM_BP_DIRECT	GO:0007259~cell surface receptor signaling pathway via JAK-STAT	3	0.52356	0.0514542	STAT1, STAT2, STAT6	424	14	15999	8.08575	1	1	1
GOTERM_BP_DIRECT	GO:0006473~protein acetylation	2	0.34904	0.0521809	LOC122425091, NAT9	424	2	15999	37.7335	1	1	1
GOTERM_CC_DIRECT	GO:0005874~microtubule	5	0.8726	0.0525205	LOC122426544, MAP1S, MX2, LOC122441498, MX1	375	58	15361	3.53126	0.999961	0.987385	0.982133
KEGG_PATHWAY	ccad05165:Human papillomavirus infection	16	2.79232	0.0527206	STAT1, MX2, STAT2, ITGA2B, MX1, ISG15, TCIRG1, PKM, IRF1, LOC122441498, EIF4EBP1, BAX, IKBKE, IRF9, LLGL1, HES4	276	359	10427	1.68374	1	0.637227	0.613862
GOTERM_MF_DIRECT	GO:0017050~D-erythro-sphingosine kinase activity	2	0.34904	0.0535171	SPHK2, SPHK1	447	2	16442	36.783	1	1	1
GOTERM_MF_DIRECT	GO:0071617~lysophospholipid acyltransferase activity	2	0.34904	0.0535171	MBOAT7, LPCAT3	447	2	16442	36.783	1	1	1
GOTERM_MF_DIRECT	GO:0000009~alpha-1,6-mannosyltransferase activity	2	0.34904	0.0535171	ALG12, PIGV	447	2	16442	36.783	1	1	1
KEGG_PATHWAY	ccad00260:Glycine, serine and threonine metabolism	5	0.8726	0.0535722	ALAS1, SDS, SHMT2, BPGM, LOC122437619	276	54	10427	3.49805	1	0.637227	0.613862
KEGG_PATHWAY	ccad03410:Base excision repair	5	0.8726	0.0566273	POLD2, POLL, NEIL1, POLG, UNG	276	55	10427	3.43445	1	0.637227	0.613862
KEGG_PATHWAY	ccad05212:Pancreatic cancer	6	1.04712	0.0598575	RALBP1, GADD45B, STAT1, BAX, E2F2, BCL2L1	276	80	10427	2.83342	1	0.637227	0.613862
KEGG_PATHWAY	ccad05417:Lipid and atherosclerosis	12	2.09424	0.0613633	PLCB3, IRAK1, NCF1, CASP1, IRF7, BAX, FOS, BID, IKBKE, VAV1, LOC122436914, BCL2L1	276	246	10427	1.84288	1	0.637227	0.613862
KEGG_PATHWAY	ccad05161:Hepatitis B	10	1.7452	0.0628014	IRAK1, STAT1, STAT2, IRF7, BAX, E2F2, STAT6, FOS, BID, IKBKE	276	189	10427	1.99889	1	0.637227	0.613862
KEGG_PATHWAY	ccad00051:Fructose and mannose metabolism	4	0.69808	0.0639434	HK3, PFKFB4, TPI1, GMPPA	276	35	10427	4.3176	1	0.637227	0.613862
KEGG_PATHWAY	ccad04140:Autophagy - animal	10	1.7452	0.0679243	MTMR14, GORASP1, AKT1S1, MLST8, ATG2A, RAB7B, RAB8A, OPTN, BCL2L1, CTSB	276	192	10427	1.96766	1	0.637227	0.613862
KEGG_PATHWAY	ccad05203:Viral carcinogenesis	11	1.91972	0.0679709	VAC14, HDAC5, PKM, HDAC11, IRF7, MRPS18B, BAX, LTBR, IRF9, HDAC7, NFKB2	276	221	10427	1.8804	1	0.637227	0.613862
GOTERM_BP_DIRECT	GO:0000226~microtubule cytoskeleton organization	6	1.04712	0.0687816	NUAK2, LOC122426544, MAP1S, TTLL1, EML2, EML3	424	83	15999	2.72772	1	1	1
GOTERM_MF_DIRECT	GO:0008017~microtubule binding	9	1.57068	0.0702925	CCDC88B, MAP1S, MAST2, MX2, MX1, KIF1C, KIF22, EML2, EML3	447	160	16442	2.06904	1	1	1
KEGG_PATHWAY	ccad03250:Viral life cycle - HIV-1	6	1.04712	0.0707634	MAP1S, MX2, MX1, NELFB, SUPT5H, APOBEC3B	276	84	10427	2.6985	1	0.643304	0.619716
GOTERM_CC_DIRECT	GO:0071797~LUBAC complex	2	0.34904	0.0712827	RNF31, RBCK1	375	3	15361	27.3084	0.999999	1	1
GOTERM_BP_DIRECT	GO:0006954~inflammatory response	7	1.22164	0.0716215	PTGIR, LOC122428204, CXCR3, IL2RA, CCRL2, NFKB2, RELB	424	110	15999	2.40122	1	1	1
GOTERM_MF_DIRECT	GO:0004521~RNA endonuclease activity	3	0.52356	0.076366	KHNYN, SLFN14, ZC3H12A	447	17	16442	6.49112	1	1	1
KEGG_PATHWAY	ccad05166:Human T-cell leukemia virus 1 infection	12	2.09424	0.0767039	VAC14, CRTC2, SPI1, IL2RA, BAX, E2F2, LTBR, TLN2, FOS, BCL2L1, NFKB2, RELB	276	256	10427	1.77089	1	0.676799	0.651983
GOTERM_BP_DIRECT	GO:0097039~protein linear polyubiquitination	2	0.34904	0.0772436	RNF31, RBCK1	424	3	15999	25.1557	1	1	1
GOTERM_BP_DIRECT	GO:0008630~intrinsic apoptotic signaling pathway in response to DNA damage	3	0.52356	0.0807714	BAX, PML, BCL2L1	424	18	15999	6.28892	1	1	1
KEGG_PATHWAY	ccad04622:RIG-I-like receptor signaling pathway	6	1.04712	0.0826888	ZNFX1, DHX58, IRF7, ISG15, ADAR, IKBKE	276	88	10427	2.57584	1	0.708761	0.682773
GOTERM_CC_DIRECT	GO:0005925~focal adhesion	4	0.69808	0.0865891	ARHGAP22, ASAP3, ILK, TLN2	375	43	15361	3.81048	1	1	1
KEGG_PATHWAY	ccad05202:Transcriptional misregulation in cancer	10	1.7452	0.0868503	LYL1, SPI1, GADD45B, FUS, EWSR1, TFE3, BAX, LOC122455194, PML, BCL2L1	276	202	10427	1.87025	1	0.723752	0.697215
GOTERM_BP_DIRECT	GO:0032869~cellular response to insulin stimulus	3	0.52356	0.088747	PKM, RAB8A, LPIN3	424	19	15999	5.95792	1	1	1
GOTERM_CC_DIRECT	GO:0031410~cytoplasmic vesicle	4	0.69808	0.0913276	RUSC1, SNX33, ARAP1, OCEL1	375	44	15361	3.72388	1	1	1
KEGG_PATHWAY	ccad05132:Salmonella infection	13	2.26876	0.0949907	GSDMD, RIPK3, LOC122426544, EXOC7, FOS, SNX33, KLC4, CYTH4, IRAK1, CASP1, BAX, RAB7B, MYL9	276	298	10427	1.64808	1	0.770195	0.741954
GOTERM_MF_DIRECT	GO:0000287~magnesium ion binding	6	1.04712	0.0977854	THTPA, PKM, MAST2, PPM1N, RPS6KA1, NUDT18	447	90	16442	2.4522	1	1	1
GOTERM_MF_DIRECT	GO:0030246~carbohydrate binding	4	0.69808	0.0992969	LGALSL, GALM, MAN2C1, LGALS9	447	41	16442	3.58859	1	1	1

## Sheet: Suppl_table4_MF,BP, KEGG_DoDEG_
Category	Term	Count	%	PValue	Genes	List Total	Pop Hits	Pop Total	Fold Enrichment	Bonferroni	Benjamini	FDR
GOTERM_CC_DIRECT	GO:0005634~nucleus	84	25.6098	5.05882e-11	RBM27, ZNF451, GSK3B, SMG1, UBXN2B, CCNT1, CELF1, LOC122451652, HP1BP3, PRDM2, AHR, AFF3, ETS1, SENP6, SENP7, CCND2, LOC122439762, SESN3, PAPOLA, HABP4, PWWP2A, TNPO1, MYBL1, RNF111, LOC122452552, DDX17, NCOA3, PDE4D, IPMK, DYRK1A, UBE4A, DICER1, ASH1L, ETV3, ZFX, RSBN1, UHMK1, SENP1, PPM1A, SFPQ, PPM1B, CREB1, BIRC6, GEMIN6, SRFBP1, ZNF236, CSNK1G1, RRN3, INO80D, HLF, KMT2A, KLHL15, KMT2C, MYNN,…	235	2723	15361	2.01643	6.82941e-09	6.82941e-09	6.82941e-09
GOTERM_BP_DIRECT	GO:0016926~protein desumoylation	4	1.21951	0.000136708	SENP6, SENP7, USPL1, SENP1	258	7	15999	35.4352	0.0458117	0.0467543	0.0464809
KEGG_PATHWAY	ccad05206:MicroRNAs in cancer	10	3.04878	0.000417788	FZD3, CDK6, CCND2, PRKCE, DICER1, PIK3R1, SIRT1, CRK, THBS1, GLS	139	170	10427	4.41261	0.0999498	0.0929628	0.085614
GOTERM_MF_DIRECT	GO:0004674~protein serine/threonine kinase activity	11	3.35366	0.000488782	LATS1, GSK3B, SMG1, SLK, PDPK1, CSNK1A1, DYRK1A, PKN2, RIOK1, CSNK1G1, UHMK1	263	174	16442	3.95223	0.103292	0.108998	0.108998
GOTERM_BP_DIRECT	GO:0018105~peptidyl-serine phosphorylation	7	2.13415	0.000605819	LATS1, PDPK1, CSNK1A1, PRKCE, DYRK1A, CSNK1G1, UHMK1	258	65	15999	6.67818	0.187678	0.0712704	0.0708536
GOTERM_BP_DIRECT	GO:0006357~regulation of transcription by RNA polymerase II	33	10.061	0.000730219	ZNF451, HLF, CCNT1, MYNN, ZBTB43, ZBTB20, PRDM2, AHR, IKZF2, ZNF24, ETS1, FOXO1, BACH2, PURB, EPC1, EPC2, ZBTB18, SMAD3, NFYA, PEG3, MGA, TSC22D2, NFATC2, ZBTB34, ETV3, ZFX, MED23, KLF7, ZBTB6, CREB1, RFX7, ZNF236, BRWD1	258	1094	15999	1.87055	0.221633	0.0712704	0.0708536
KEGG_PATHWAY	ccad04931:Insulin resistance	8	2.43902	0.000734884	GSK3B, MAPK8, CREB1, PDPK1, PRKCE, GFPT1, PIK3R1, FOXO1	139	113	10427	5.31075	0.169111	0.0929628	0.085614
GOTERM_BP_DIRECT	GO:0010468~regulation of gene expression	7	2.13415	0.000833572	CDK6, ZNF827, ZNF507, LOC122428082, TOB2, AFF3, TOB1	258	69	15999	6.29103	0.248763	0.0712704	0.0708536
GOTERM_CC_DIRECT	GO:0000151~ubiquitin ligase complex	5	1.52439	0.0010536	DCUN1D3, DCUN1D2, UBE4A, UBR1, RNF2	235	30	15361	10.8943	0.132649	0.0711183	0.0711183
KEGG_PATHWAY	ccad05200:Pathways in cancer	18	5.4878	0.00122343	GSK3B, FZD3, SMAD3, NCOA3, CXCR4, LOC122449754, PIK3R1, ETS1, FOXO1, GNA13, CDC42, MAPK8, CDK6, CCND2, KIT, IL3RA, TRAF5, CRK	139	564	10427	2.39408	0.265447	0.094334	0.0868768
GOTERM_MF_DIRECT	GO:0000981~DNA-binding transcription factor activity, RNA polymerase II-specific	27	8.23171	0.00147063	ZNF451, HLF, MYNN, ZBTB43, ZBTB20, PRDM2, ZNF24, ETS1, FOXO1, BACH2, PURB, MYBL1, ZBTB18, SMAD3, NFYA, PEG3, MGA, NFATC2, ZBTB34, ETV3, ZFX, SKI, KLF7, ZBTB6, CREB1, RFX7, ZNF236	263	866	16442	1.94915	0.279774	0.163975	0.163975
KEGG_PATHWAY	ccad04510:Focal adhesion	10	3.04878	0.00175208	CDC42, GSK3B, MAPK8, CCND2, PPP1R12A, PDPK1, ITGA1, PIK3R1, CRK, THBS1	139	208	10427	3.60646	0.357194	0.094334	0.0868768
KEGG_PATHWAY	ccad04218:Cellular senescence	9	2.7439	0.00186431	CDK6, CCND2, SMAD3, ITPR2, NFATC2, PIK3R1, SIRT1, ETS1, FOXO1	139	170	10427	3.97135	0.37515	0.094334	0.0868768
GOTERM_MF_DIRECT	GO:0003723~RNA binding	20	6.09756	0.00273095	RBM27, DDX17, RBM39, NUFIP2, MSI2, DICER1, UHMK1, ENOX2, SFPQ, AGO3, TRA2A, AGO2, PAPOLA, HABP4, GEMIN6, SREK1, PPIL4, ZCCHC3, DZIP3, DCP2	263	586	16442	2.13369	0.456559	0.203001	0.203001
GOTERM_CC_DIRECT	GO:0005783~endoplasmic reticulum	13	3.96341	0.00331092	EDEM3, STARD4, UBIAD1, TMED10, LOC122451878, ERLIN1, ITPR2, ACSL3, TMX3, APH1B, MAN1A2, TMEM33, SSR1	235	315	15361	2.69764	0.360913	0.148991	0.148991
GOTERM_BP_DIRECT	GO:0061024~membrane organization	3	0.914634	0.00511793	SAR1A, TMEM33, LOC122451878	258	7	15999	26.5764	0.827948	0.350067	0.34802
GOTERM_MF_DIRECT	GO:0005524~ATP binding	31	9.45122	0.00541338	EIF4A2, GSK3B, ATP2A2, ATAD2B, MAPK8, SLK, KIF3B, KIF5B, NEK1, RIOK1, DDX17, DDX18, HELQ, PDPK1, CSNK1A1, PRKCE, DYRK1A, DICER1, CLK4, UHMK1, LATS1, CLK1, PIKFYVE, CDK6, KATNAL1, DNAJA4, STK26, TAOK1, KIT, PKN2, CSNK1G1	263	1152	16442	1.68232	0.701941	0.301796	0.301796
KEGG_PATHWAY	ccad05163:Human cytomegalovirus infection	10	3.04878	0.00563936	GNA13, GSK3B, CDK6, CREB1, TRAF5, CXCR4, ITPR2, NFATC2, PIK3R1, CRK	139	248	10427	3.02477	0.759526	0.212172	0.195399
KEGG_PATHWAY	ccad04660:T cell receptor signaling pathway	7	2.13415	0.00649112	CDC42, GSK3B, MAPK8, PDPK1, NFATC2, CBLB, PIK3R1	139	126	10427	4.16747	0.806232	0.212172	0.195399
KEGG_PATHWAY	ccad04810:Regulation of actin cytoskeleton	10	3.04878	0.00690206	GNA13, CDC42, PIKFYVE, PPP1R12A, ABI2, SPATA13, ITGA1, CXCR4, PIK3R1, CRK	139	256	10427	2.93025	0.825416	0.212172	0.195399
KEGG_PATHWAY	ccad05165:Human papillomavirus infection	12	3.65854	0.00804725	CDC42, GSK3B, FZD3, CDK6, CCND2, CREB1, CSNK1A1, ITGA1, PIK3R1, THBS1, FOXO1, PALS1	139	359	10427	2.50744	0.869465	0.212172	0.195399
KEGG_PATHWAY	ccad04068:FoxO signaling pathway	7	2.13415	0.00838623	MAPK8, CCND2, SMAD3, PDPK1, PIK3R1, SIRT1, FOXO1	139	133	10427	3.94813	0.880237	0.212172	0.195399
KEGG_PATHWAY	ccad04070:Phosphatidylinositol signaling system	6	1.82927	0.0104239	PIKFYVE, IPMK, ITPR2, BPNT2, PIK3R1, PIK3C2A	139	100	10427	4.50086	0.928681	0.237683	0.218893
KEGG_PATHWAY	ccad04310:Wnt signaling pathway	8	2.43902	0.0117349	GSK3B, FZD3, MAPK8, CCND2, SMAD3, CSNK1A1, NFATC2, SIRT1	139	186	10427	3.22643	0.948936	0.237683	0.218893
KEGG_PATHWAY	ccad04933:AGE-RAGE signaling pathway in diabetic complications	6	1.82927	0.0122129	CDC42, MAPK8, SMAD3, PRKCE, PIK3R1, FOXO1	139	104	10427	4.32775	0.954798	0.237683	0.218893
KEGG_PATHWAY	ccad05135:Yersinia infection	7	2.13415	0.0145929	CDC42, GSK3B, MAPK8, NFATC2, PKN2, PIK3R1, CRK	139	150	10427	3.50067	0.975388	0.258085	0.237683
KEGG_PATHWAY	ccad05224:Breast cancer	7	2.13415	0.0159509	GSK3B, FZD3, CDK6, CSNK1A1, NCOA3, KIT, PIK3R1	139	153	10427	3.43203	0.982613	0.258085	0.237683
KEGG_PATHWAY	ccad05417:Lipid and atherosclerosis	9	2.7439	0.016428	CDC42, GSK3B, MAPK8, PDPK1, LOC122449754, NFATC2, PIK3R1, TANK, MIB1	139	246	10427	2.74443	0.984613	0.258085	0.237683
KEGG_PATHWAY	ccad00250:Alanine, aspartate and glutamate metabolism	4	1.21951	0.017877	PPAT, GFPT1, ADSS2, GLS	139	42	10427	7.14423	0.989388	0.258085	0.237683
KEGG_PATHWAY	ccad04910:Insulin signaling pathway	7	2.13415	0.0194551	GSK3B, MAPK8, PDPK1, CBLB, PIK3R1, CRK, FOXO1	139	160	10427	3.28188	0.992924	0.258085	0.237683
KEGG_PATHWAY	ccad05162:Measles	7	2.13415	0.0199953	GSK3B, MAPK8, CDK6, CCND2, CBLB, PIK3R1, CD46	139	161	10427	3.2615	0.993841	0.258085	0.237683
KEGG_PATHWAY	ccad04934:Cushing syndrome	7	2.13415	0.0205456	GSK3B, FZD3, CDK6, CREB1, KMT2A, ITPR2, AHR	139	162	10427	3.24136	0.994654	0.258085	0.237683
GOTERM_BP_DIRECT	GO:0000082~G1/S transition of mitotic cell cycle	3	0.914634	0.0205958	LATS1, CDK6, SPDYA	258	14	15999	13.2882	0.999206	1	0.997067
KEGG_PATHWAY	ccad05212:Pancreatic cancer	5	1.52439	0.021422	CDC42, MAPK8, CDK6, SMAD3, PIK3R1	139	80	10427	4.6884	0.995734	0.258085	0.237683
GOTERM_BP_DIRECT	GO:0008286~insulin receptor signaling pathway	3	0.914634	0.0235158	GSK3B, PIK3R1, FOXO1	258	15	15999	12.4023	0.999715	1	0.997067
KEGG_PATHWAY	ccad04919:Thyroid hormone signaling pathway	6	1.82927	0.0242971	GSK3B, PDPK1, NCOA3, ATP2A2, PIK3R1, FOXO1	139	124	10427	3.62973	0.997967	0.262795	0.242021
KEGG_PATHWAY	ccad04152:AMPK signaling pathway	6	1.82927	0.0242971	CREB1, CAB39, PDPK1, PIK3R1, SIRT1, FOXO1	139	124	10427	3.62973	0.997967	0.262795	0.242021
KEGG_PATHWAY	ccad04935:Growth hormone synthesis, secretion and action	6	1.82927	0.0258159	GSK3B, MAPK8, CREB1, ITPR2, PIK3R1, CRK	139	126	10427	3.57211	0.998627	0.262795	0.242021
KEGG_PATHWAY	ccad04148:Efferocytosis	7	2.13415	0.0259679	CREB1, ADAM10, NFATC2, ATP2A2, SIRT1, CRK, THBS1	139	171	10427	3.07076	0.99868	0.262795	0.242021
KEGG_PATHWAY	ccad04722:Neurotrophin signaling pathway	6	1.82927	0.0273945	CDC42, GSK3B, MAPK8, PDPK1, PIK3R1, CRK	139	128	10427	3.5163	0.999088	0.263389	0.242568
KEGG_PATHWAY	ccad04012:ErbB signaling pathway	5	1.52439	0.0281087	GSK3B, MAPK8, CBLB, PIK3R1, CRK	139	87	10427	4.31117	0.999242	0.263389	0.242568
GOTERM_CC_DIRECT	GO:0032777~piccolo histone acetyltransferase complex	2	0.609756	0.0302357	EPC1, EPC2	235	2	15361	65.366	0.984153	0.924279	0.924279
KEGG_PATHWAY	ccad04022:cGMP-PKG signaling pathway	7	2.13415	0.0307914	GNA13, CREB1, PPP1R12A, PRKCE, ITPR2, NFATC2, ATP2A2	139	178	10427	2.95	0.999622	0.273193	0.251597
KEGG_PATHWAY	ccad04211:Longevity regulating pathway	5	1.52439	0.0313147	CREB1, SESN3, PIK3R1, SIRT1, FOXO1	139	90	10427	4.16747	0.99967	0.273193	0.251597
GOTERM_MF_DIRECT	GO:0070139~SUMO-specific endopeptidase activity	2	0.609756	0.0316166	SENP6, SENP7	263	2	16442	62.5171	0.999226	1	1
GOTERM_MF_DIRECT	GO:0005515~protein binding	49	14.939	0.033026	SMG1, WDR47, ZBTB20, PRDM2, EFCAB8, BACH2, WDR43, WDR44, GLS, SLK, ANKRD44, ZBTB34, DICER1, ASH1L, LATS1, CREB1, GAN, SPATA13, IL3RA, NHLRC2, CRK, LRRC57, KMT2A, KLHL15, MYNN, ZBTB43, PIK3R1, ZBTB44, THBS1, ZBTB41, LOC122444987, AMN1, SPOCK2, LRRC8C, PDZD8, ZBTB18, ERBIN, BTBD7, ZBTB11, MIB1, KBTBD3, SPSB1, ZBTB6, AGO3, AGO2, BRWD1, KBTBD8, EIF4G2, PALS1	263	2320	16442	1.3204	0.999441	1	1
GOTERM_BP_DIRECT	GO:0000184~nuclear-transcribed mRNA catabolic process, nonsense-mediated decay	3	0.914634	0.0332048	SMG1, UPF3A, DCP2	258	18	15999	10.3353	0.999991	1	0.997067
GOTERM_CC_DIRECT	GO:0005789~endoplasmic reticulum membrane	9	2.7439	0.0342325	ERLIN1, DERL1, SARAF, SSR1, DNAJC25, ALG11, SEC22B, SLC37A3, MARCHF6	235	245	15361	2.4012	0.990926	0.924279	0.924279
KEGG_PATHWAY	ccad04380:Osteoclast differentiation	6	1.82927	0.0352528	MAPK8, CREB1, ITPR2, NFATC2, ATP2A2, PIK3R1	139	137	10427	3.2853	0.999882	0.297299	0.273797
GOTERM_MF_DIRECT	GO:0030145~manganese ion binding	3	0.914634	0.0361925	PPM1A, PPM1B, DCP2	263	19	16442	9.87112	0.999731	1	1
GOTERM_BP_DIRECT	GO:0090263~positive regulation of canonical Wnt signaling pathway	3	0.914634	0.0367252	PPM1A, PPM1B, CSNK1G1	258	19	15999	9.79131	0.999997	1	0.997067
GOTERM_BP_DIRECT	GO:0045893~positive regulation of DNA-templated transcription	5	1.52439	0.0414084	KMT2A, MGA, TP53INP1, DYRK1A, RNF111	258	81	15999	3.82788	0.999999	1	0.997067
KEGG_PATHWAY	ccad04360:Axon guidance	7	2.13415	0.0421174	CDC42, GSK3B, FZD3, PDPK1, CXCR4, NFATC2, PIK3R1	139	192	10427	2.7349	0.99998	0.340691	0.313759
KEGG_PATHWAY	ccad04340:Hedgehog signaling pathway	4	1.21951	0.0430913	GSK3B, CCND2, CSNK1A1, CSNK1G1	139	59	10427	5.08572	0.999985	0.340691	0.313759
GOTERM_CC_DIRECT	GO:0016442~RISC complex	2	0.609756	0.0450104	AGO2, DICER1	235	3	15361	43.5773	0.998006	1	1
KEGG_PATHWAY	ccad04151:PI3K-Akt signaling pathway	11	3.35366	0.0460172	GSK3B, CDK6, CCND2, CREB1, PDPK1, KIT, ITGA1, IL3RA, PKN2, PIK3R1, THBS1	139	411	10427	2.00768	0.999993	0.352798	0.324909
GOTERM_BP_DIRECT	GO:0006355~regulation of DNA-templated transcription	11	3.35366	0.0468845	SBNO1, SFPQ, LOC122439762, AGO2, LOC122433002, LOC122440459, LRIF1, ZNF655, FOXN2, SPTY2D1, MYBL1	258	338	15999	2.01813	1	1	0.997067
GOTERM_MF_DIRECT	GO:0005092~GDP-dissociation inhibitor activity	2	0.609756	0.0470495	EIF5, CHML	263	3	16442	41.6781	0.999978	1	1
KEGG_PATHWAY	ccad05215:Prostate cancer	5	1.52439	0.0476104	GSK3B, CREB1, PDPK1, PIK3R1, FOXO1	139	103	10427	3.64148	0.999995	0.354277	0.326271
GOTERM_MF_DIRECT	GO:0000978~RNA polymerase II cis-regulatory region sequence-specific DNA binding	21	6.40244	0.0484226	ZBTB18, HLF, SMAD3, NFYA, PEG3, MGA, ZBTB43, MYNN, NFATC2, ZBTB20, ZBTB34, ZNF24, IKZF2, FOXO1, BACH2, SKI, KLF7, ZBTB6, RFX7, ZNF236, MYBL1	263	841	16442	1.56107	0.999984	1	1
KEGG_PATHWAY	ccad04625:C-type lectin receptor signaling pathway	5	1.52439	0.0534126	MAPK8, ITPR2, NFATC2, CBLB, PIK3R1	139	107	10427	3.50535	0.999999	0.36707	0.338053
KEGG_PATHWAY	ccad05166:Human T-cell leukemia virus 1 infection	8	2.43902	0.0534921	MAPK8, CCND2, SMAD3, CREB1, NFATC2, PIK3R1, LOC122429364, ETS1	139	256	10427	2.3442	0.999999	0.36707	0.338053
KEGG_PATHWAY	ccad04141:Protein processing in endoplasmic reticulum	7	2.13415	0.0536822	EDEM3, MAPK8, SAR1A, MAN1A2, DERL1, SSR1, MARCHF6	139	204	10427	2.57402	0.999999	0.36707	0.338053
GOTERM_MF_DIRECT	GO:0042393~histone binding	5	1.52439	0.0556715	SBNO1, KMT2C, PWWP2A, SPTY2D1, ATAD2B	263	90	16442	3.47317	0.999997	1	1
GOTERM_MF_DIRECT	GO:0043565~sequence-specific DNA binding	5	1.52439	0.0575344	ZNF451, LOC122439762, ETV3, ETS1, THAP1	263	91	16442	3.43501	0.999998	1	1
KEGG_PATHWAY	ccad04210:Apoptosis	6	1.82927	0.0624753	CTSO, MAPK8, PDPK1, IL3RA, ITPR2, PIK3R1	139	161	10427	2.79557	1	0.415954	0.383072
GOTERM_BP_DIRECT	GO:0006047~UDP-N-acetylglucosamine metabolic process	2	0.609756	0.0627281	GFPT1, GNE	258	4	15999	31.0058	1	1	0.997067
KEGG_PATHWAY	ccad03015:mRNA surveillance pathway	5	1.52439	0.0661167	SMG1, PCF11, PAPOLA, UPF3A, MSI2	139	115	10427	3.2615	1	0.428911	0.395005
GOTERM_CC_DIRECT	GO:0005813~centrosome	6	1.82927	0.0677869	STIL, DYNC1LI2, CSPP1, CEP350, CEP85L, CEP162	235	143	15361	2.74263	0.999923	1	1
KEGG_PATHWAY	ccad04659:Th17 cell differentiation	5	1.52439	0.0695186	MAPK8, SMAD3, NFATC2, AHR, LOC122429364	139	117	10427	3.20574	1	0.439705	0.404946
KEGG_PATHWAY	ccad05167:Kaposi sarcoma-associated herpesvirus infection	7	2.13415	0.0718454	GSK3B, MAPK8, CDK6, CREB1, ITPR2, NFATC2, PIK3R1	139	220	10427	2.38682	1	0.440252	0.405449
KEGG_PATHWAY	ccad05203:Viral carcinogenesis	7	2.13415	0.0730853	CDC42, CDK6, CCND2, CREB1, LOC122434005, TRAF5, PIK3R1	139	221	10427	2.37602	1	0.440252	0.405449
KEGG_PATHWAY	ccad04390:Hippo signaling pathway	6	1.82927	0.0765486	LATS1, GSK3B, FZD3, CCND2, SMAD3, PALS1	139	171	10427	2.63208	1	0.446794	0.411475
GOTERM_MF_DIRECT	GO:0032182~ubiquitin-like protein binding	2	0.609756	0.0771841	DCUN1D3, DCUN1D2	263	5	16442	25.0068	1	1	1
GOTERM_BP_DIRECT	GO:0045948~positive regulation of translational initiation	2	0.609756	0.0777877	HABP4, UHMK1	258	5	15999	24.8047	1	1	0.997067
GOTERM_BP_DIRECT	GO:0051443~positive regulation of ubiquitin-protein transferase activity	2	0.609756	0.0777877	DCUN1D3, DCUN1D2	258	5	15999	24.8047	1	1	0.997067
KEGG_PATHWAY	ccad05211:Renal cell carcinoma	4	1.21951	0.0794694	CDC42, PIK3R1, CRK, ETS1	139	76	10427	3.94813	1	0.446794	0.411475
KEGG_PATHWAY	ccad05223:Non-small cell lung cancer	4	1.21951	0.0794694	CDK6, PDPK1, KIF5B, PIK3R1	139	76	10427	3.94813	1	0.446794	0.411475
KEGG_PATHWAY	ccad05205:Proteoglycans in cancer	7	2.13415	0.0821082	CDC42, FZD3, PPP1R12A, PDPK1, ITPR2, PIK3R1, THBS1	139	228	10427	2.30307	1	0.451595	0.415896
KEGG_PATHWAY	ccad04110:Cell cycle	6	1.82927	0.0873408	GSK3B, CDK6, CCND2, SMAD3, ORC2, PDS5B	139	178	10427	2.52857	1	0.463003	0.426402
KEGG_PATHWAY	ccad04071:Sphingolipid signaling pathway	5	1.52439	0.0878424	GNA13, MAPK8, PDPK1, PRKCE, PIK3R1	139	127	10427	2.95332	1	0.463003	0.426402
GOTERM_BP_DIRECT	GO:0051298~centrosome duplication	2	0.609756	0.0926063	STIL, CHORDC1	258	6	15999	20.6705	1	1	0.997067
KEGG_PATHWAY	ccad05225:Hepatocellular carcinoma	6	1.82927	0.0938483	GSK3B, FZD3, CDK6, SMAD3, CSNK1A1, PIK3R1	139	182	10427	2.473	1	0.465372	0.428584
GOTERM_MF_DIRECT	GO:0019901~protein kinase binding	4	1.21951	0.0944411	PPP1R12A, PRKRIP1, SPDYA, LYST	263	68	16442	3.67748	1	1	1
KEGG_PATHWAY	ccad00310:Lysine degradation	4	1.21951	0.0946852	KMT2A, KMT2C, PRDM2, ASH1L	139	82	10427	3.65924	1	0.465372	0.428584
KEGG_PATHWAY	ccad05010:Alzheimer disease	11	3.35366	0.0966092	GSK3B, FZD3, MAPK8, APH1B, CSNK1A1, SLC39A9, KIF5B, ADAM10, ITPR2, ATP2A2, PIK3R1	139	473	10427	1.74452	1	0.465372	0.428584
GOTERM_MF_DIRECT	GO:0004722~protein serine/threonine phosphatase activity	3	0.914634	0.0967883	PPM1A, PPM1B, PDP2	263	33	16442	5.68337	1	1	1
KEGG_PATHWAY	ccad05220:Chronic myeloid leukemia	4	1.21951	0.0973302	CDK6, SMAD3, PIK3R1, CRK	139	83	10427	3.61515	1	0.465372	0.428584
KEGG_PATHWAY	ccad05170:Human immunodeficiency virus 1 infection	7	2.13415	0.0974891	MAPK8, TRAF5, CXCR4, ITPR2, NFATC2, PIK3R1, CRK	139	239	10427	2.19707	1	0.465372	0.428584
GOTERM_CC_DIRECT	GO:0005654~nucleoplasm	6	1.82927	0.0980047	NUFIP2, CHAMP1, SPDYA, TASOR2, SREK1, TNRC6B	235	160	15361	2.45122	0.999999	1	1
