# Supplementary material for: Peripheral transcriptional responses to experimental SARS-CoV-2 inoculation in North American Elk cows and calves
Source: Research Square preprint supplement (doi:10.21203/rs.3.rs-6505643/v1), 2025-05-15
Supplement: Supplementary file 7 [file b18b6d3acceb3cabfd9b7784.xlsx]

## Sheet: downregulated
Supplementary Table S3 - Downregulated genes in Calves (D0xD5)
gene_id	log2fc	padj
LOC122429364	-4.11424	0.0309072
LOC122449754	-1.3884	0.0371327
LOC122454774	-0.917369	0.000134479
THBS1	-0.719006	0.00848842
CCDC117	-0.653792	0.000606187
DSEL	-0.653141	1.11141165407529e-08
LOC122454757	-0.652585	0.0169341
MYBL1	-0.632762	0.0116988
CHORDC1	-0.562938	6.03055619004951e-05
PID1	-0.556139	0.0447341
KBTBD3	-0.548981	0.0305957
ATPSCKMT	-0.546991	0.0202033
SPDYA	-0.527678	0.0243944
ITGA1	-0.527658	0.0301916
DNAJA4	-0.522523	0.0487825
KBTBD8	-0.518586	0.00923491
LOC122454831	-0.509892	0.00505412
IKZF2	-0.509727	0.0256798
PLCL1	-0.506456	0.0148068
LYSMD3	-0.506204	0.0184973
CEP85L	-0.500539	0.0079673
FZD3	-0.478971	0.00779634
LOC122440459	-0.47829	0.014576
IPMK	-0.477943	0.0262377
LRRC57	-0.477528	0.00494634
SRFBP1	-0.476237	0.0208721
KLHL15	-0.473943	0.043959
NEK1	-0.471284	0.0079673
NOCT	-0.466073	0.0239831
CA8	-0.46524	0.0144653
EPDR1	-0.457454	0.0100686
RAB11FIP2	-0.45492	0.0178303
TRA2A	-0.454761	0.00278761
LOC122434601	-0.453186	0.0487825
UHMK1	-0.452846	0.0232361
GEMIN6	-0.451356	0.0104041
FOXN2	-0.449566	0.0428176
CDK6	-0.448248	0.00397199
DBT	-0.447879	0.0215429
FAM126A	-0.444114	0.0142005
H1-6	-0.442142	0.0487825
SLC26A2	-0.441671	0.00602123
STARD4	-0.441236	0.0240167
MYNN	-0.436195	0.0149697
LOC122434005	-0.435958	0.0079673
TMEM245	-0.434837	0.0339784
PEG3	-0.434229	0.0205066
ZNF507	-0.434109	0.0100686
TP53INP1	-0.433544	0.00848842
HEG1	-0.432207	0.0368496
RNF2	-0.426773	0.00339143
USP53	-0.426421	0.0214836
ZBTB18	-0.424898	0.0130805
UBN2	-0.424823	0.00921913
UGCG	-0.423095	0.0111592
ADHFE1	-0.423047	0.0296168
ZBTB20	-0.422495	0.0449231
IL3RA	-0.422459	0.0438036
DIPK2A	-0.420077	0.0345803
DCUN1D2	-0.41808	0.0348574
PDE4D	-0.416087	0.0262377
SLC12A2	-0.413542	0.034836
PKN2	-0.413406	0.000778948
CLK4	-0.412462	0.0177709
EDEM3	-0.408587	0.013778
ATAD2B	-0.408432	0.0100577
LOC122433002	-0.404477	0.00210521
NUFIP2	-0.404245	0.00623336
RAB44	-0.403674	0.000336953
PCNX4	-0.402736	0.0403334
MSANTD4	-0.402661	0.00922117
RAB27A	-0.401655	0.00222141
ZBTB6	-0.400778	0.00615348
LOC122428082	-0.39816	0.0282989
KATNAL1	-0.397046	0.0493863
SLC5A3	-0.396908	0.0151131
PLAGL1	-0.396417	0.00923491
RC3H1	-0.39639	0.0118352
LATS1	-0.392837	0.0188758
WDR47	-0.391077	0.00848842
PGM2L1	-0.391004	0.0396682
TAOK1	-0.387699	0.0177709
KIT	-0.385952	0.0493863
PDP2	-0.38586	0.00647369
LOC122446612	-0.382117	0.0487825
INO80D	-0.381914	0.0263493
PPP1R12A	-0.381867	0.00400361
LRIF1	-0.381775	0.0125474
LOC122444800	-0.381692	0.0328789
CCDC66	-0.381513	0.00397199
CDC42EP3	-0.381453	0.0129589
LOC122451878	-0.380459	0.0228499
RSBN1	-0.380258	0.000904079
LOC122423414	-0.379617	0.0424793
CBLB	-0.378706	0.00122537
ZBTB43	-0.377982	0.000738474
GFPT1	-0.377486	0.0249134
TSC22D2	-0.377271	0.00331749
ERLIN1	-0.375169	0.0368496
ZBTB41	-0.375058	0.0134684
KMT2A	-0.37379	0.00593572
ENPP4	-0.372596	0.0136506
CHML	-0.371578	0.0378417
SECISBP2L	-0.37153	0.0178306
CCND2	-0.371412	0.00173112
CPEB4	-0.371411	0.0195223
STK26	-0.371288	0.0264663
DNAJC25	-0.37091	0.00222141
AMN1	-0.370771	0.0373944
GAN	-0.369947	0.000324241
ZBTB44	-0.368602	0.0320023
AGO2	-0.368523	0.00848842
MYSM1	-0.368516	0.0238461
STIL	-0.367609	0.00634614
USPL1	-0.366893	0.0112165
TMX3	-0.363918	0.0294455
HLF	-0.362574	0.0466115
DCBLD2	-0.361422	0.0243931
CREB1	-0.361169	0.0109014
ZNF236	-0.35911	0.012558
LEMD3	-0.35849	0.0113085
EIF4A2	-0.35771	0.0328097
MAPK8	-0.357651	0.0187717
DZIP3	-0.356065	0.0307292
PREPL	-0.355291	0.0371327
LOC122451157	-0.355143	0.0348751
LYST	-0.355077	0.0303114
ZBTB11	-0.353417	0.0346662
AGO3	-0.34997	0.0381224
MSI2	-0.349252	0.0339784
TMEM33	-0.349137	0.0243944
PPAT	-0.348216	0.000900336
UPF3A	-0.347814	0.042825
CLK1	-0.347651	0.0371327
BRWD1	-0.347415	0.0272204
MIB1	-0.347269	0.0149216
SIRT1	-0.34717	0.0401034
ERRFI1	-0.347167	0.00472677
LRRC8C	-0.346481	0.0267706
TMOD3	-0.346069	0.0116988
CTSO	-0.345401	0.0141732
PPIL4	-0.3448	0.0117674
TRAF5	-0.343913	0.043844
SMG1	-0.343351	0.0104041
PIK3C2A	-0.341456	0.0461161
CXCR4	-0.340156	0.0246893
LOC122449992	-0.34004	0.0030033
TNPO1	-0.338938	0.047721
ZZZ3	-0.338518	0.0385481
CRK	-0.336331	0.0177709
KMT2C	-0.333534	0.0168863
BACH2	-0.329898	0.00421684
WDR44	-0.327798	0.0116988
CNST	-0.327582	0.0242004
HELQ	-0.327547	0.0130805
ZNF605	-0.32669	0.0385957
ADAM10	-0.325112	0.010721
LOC122434400	-0.324119	0.0243944
PPM1B	-0.323429	0.00461341
INTS2	-0.322784	0.0305957
ABI2	-0.322016	0.0191266
RFX7	-0.320693	0.042825
GLS	-0.31945	0.045502
UBXN2B	-0.318216	0.00073578
PAG1	-0.317397	0.0301286
RBM39	-0.316959	0.0304682
NFATC2	-0.316925	0.00437697
ZFX	-0.316668	0.026454
TNRC6B	-0.316285	0.00921913
AHR	-0.315724	0.0235111
FRYL	-0.315084	0.012558
ITPR2	-0.314179	0.02828
AFF3	-0.31393	0.00838006
PURB	-0.313632	0.0376604
LOC122444987	-0.313558	0.0151334
CD46	-0.312185	0.0208535
KLF7	-0.31209	0.000645108
SPTY2D1	-0.312049	0.0178974
NHLRC2	-0.310489	0.0366449
LOC122451652	-0.308687	0.0124688
LOC122439762	-0.30849	0.0309072
ARL4C	-0.308176	0.00959349
PCF11	-0.308151	0.0292128
MGA	-0.306739	0.0465878
EPC2	-0.30667	0.0367766
CEP350	-0.305244	0.0126031
CNNM4	-0.305205	0.027688
APH1B	-0.304278	0.0322871
PRPF38B	-0.304201	0.00958039
PDS5B	-0.303678	0.0336309
C32H16orf72	-0.303619	0.0346871
ACSL3	-0.302748	0.0476106
ORC2	-0.30215	0.015295
KIAA1109	-0.30135	0.018518
GPR18	-0.301249	0.0276021
PIKFYVE	-0.29993	0.0469964
LOC122428717	-0.299166	0.0195223
FAM172A	-0.297876	0.0353031
SMAD3	-0.296627	0.00848842
SBNO1	-0.296344	0.0289318
MTMR9	-0.295426	0.0379408
LOC122420238	-0.295312	0.0012244
PDZD8	-0.294951	0.00564674
RAB23	-0.294591	0.0277019
PALS1	-0.293747	0.0320023
MSL2	-0.293356	0.0403841
SENP7	-0.29207	0.0424793
RRN3	-0.291965	0.00382899
RBM27	-0.288362	0.0372396
ERBIN	-0.288329	0.0235111
ADSS2	-0.287227	0.00931646
PIK3R1	-0.287103	0.00128161
STAM	-0.286962	0.0393212
LOC122448863	-0.286607	0.0109118
UBIAD1	-0.285851	0.00320017
IFFO2	-0.28469	0.012558
UBR1	-0.283856	0.0386636
ZSWIM6	-0.283729	0.0166876
ZNF451	-0.283207	0.0488296
SENP6	-0.283057	0.0461161
LOC122421102	-0.282033	0.000270839
CPNE3	-0.281014	0.00337596
ANKRD44	-0.280794	0.0448373
SREK1	-0.280566	0.0100577
MTMR12	-0.279235	0.013749
GOPC	-0.278765	0.0239768
LBR	-0.278299	0.0378417
ZNF655	-0.278051	0.0323283
ASH1L	-0.277378	0.0191585
UMAD1	-0.277335	0.042251
ACBD3	-0.277241	0.0182476
CSPP1	-0.277174	0.0231756
EIF5	-0.276865	0.0431008
ZNF827	-0.275844	0.00956983
BTBD7	-0.275232	0.00733793
LOC122421195	-0.275099	0.0416412
CSNK1G1	-0.274913	0.0130805
HABP4	-0.274851	0.0313998
YIPF4	-0.27426	0.0439757
ZBTB34	-0.272172	0.0377373
GALNT1	-0.272138	0.0363198
CELF1	-0.270683	0.00628786
LOC122448504	-0.270252	0.0113085
RNF111	-0.270178	0.0151865
NFYA	-0.268865	0.00833896
THAP1	-0.268618	0.0368496
TOB1	-0.26801	0.0378417
LOC122432234	-0.266605	0.0254111
TAF4B	-0.266412	0.0282264
PDPK1	-0.263866	0.00252237
TASOR2	-0.262018	0.0311489
SLK	-0.261383	0.0487825
ETV3	-0.259871	0.0155634
FAM120C	-0.258641	0.0202033
TAF1	-0.257836	0.0487825
SESN3	-0.256866	0.0367899
CDC73	-0.256702	0.0187717
CLINT1	-0.25639	0.018518
CEP162	-0.255787	0.0342411
TANK	-0.255636	0.0286347
BPNT2	-0.253974	0.0363198
LMBR1	-0.250757	0.0454781
CAB39	-0.250743	0.0441645
ZNF24	-0.250546	0.042825
SPSB1	-0.250541	0.0488296
PWWP2A	-0.2497	0.00838006
MAN1A2	-0.249219	0.0177709
GNE	-0.249168	0.0358633
STRN	-0.249138	0.0428176
KIF5B	-0.247238	0.0493863
DYNC1LI2	-0.246338	0.0151131
RALGAPB	-0.245934	0.00958039
CSNK1A1	-0.245746	0.0100577
DYRK1A	-0.244337	0.0428176
PRKCE	-0.243762	0.0443599
DENND1B	-0.243162	0.0466115
ADD3	-0.24266	0.0409802
NCOA3	-0.242615	0.0373667
EPC1	-0.241983	0.0208545
PRDM2	-0.240009	0.0359036
BLOC1S5	-0.239945	0.0364582
SLC37A3	-0.239881	0.0424874
YTHDF3	-0.239837	0.0431008
LOC122451962	-0.239055	0.0149697
KCTD18	-0.238847	0.0359036
GNA13	-0.23809	0.0353716
FOXO1	-0.237832	0.0443591
SAR1A	-0.237389	0.0201095
WDR43	-0.236208	0.0422705
ALG11	-0.236087	0.0236576
CACUL1	-0.235877	0.0467512
ETS1	-0.234118	0.0493863
PAPOLA	-0.234007	0.043959
PPM1A	-0.232877	0.0459983
SFPQ	-0.232736	0.0116988
SKI	-0.232694	0.00519945
BIRC6	-0.231326	0.0178306
SLC39A9	-0.23097	0.00612128
PDCD7	-0.228909	0.0166876
DCP2	-0.228713	0.0377823
LOC122420513	-0.228518	0.0336309
CHAMP1	-0.226897	0.0359036
MED23	-0.225702	0.0350413
SENP1	-0.224118	0.0476106
TMED10	-0.224022	0.0377391
MARCHF6	-0.223607	0.0130805
DERL1	-0.222899	0.0391556
ENOX2	-0.221626	0.0318628
C23H18orf25	-0.220869	0.0123889
RIOK1	-0.220018	0.0486858
SPATA13	-0.218812	0.0335975
ZCCHC3	-0.213945	0.0335785
LOC122452552	-0.213427	0.0376192
DDX18	-0.21313	0.0301286
PCMTD2	-0.21276	0.0487825
DICER1	-0.211818	0.0488296
UBE4A	-0.209906	0.00774525
TOB2	-0.207118	0.0396682
ARL6IP1	-0.206336	0.0454781
SLC23A2	-0.206258	0.031165
ATP2A2	-0.205079	0.0421052
TLNRD1	-0.202157	0.0379408
DCUN1D3	-0.194876	0.0346662
EFCAB8	-0.194292	0.0347028
SEC22B	-0.194222	0.0466115
KIF3B	-0.191181	0.0443048
DDX17	-0.189347	0.0346662
ENSA	-0.186713	0.0260079
SPOCK2	-0.186254	0.0476814
GSK3B	-0.185097	0.0320023
CCNT1	-0.184983	0.0363899
CDC42	-0.1849	0.0342411
EIF4G2	-0.184578	0.0390906
RPRD1B	-0.18023	0.0485174
RSL1D1	-0.177901	0.0305957
HP1BP3	-0.175645	0.00755042
PRKRIP1	-0.17242	0.0305957
SSR1	-0.168393	0.0406871
SARAF	-0.163611	0.0280822

## Sheet: upregulated
Supplementary Table S3 - Upregulated genes in Calves (D0xD5)
gene_id	log2fc	padj
TRAFD1	0.16148	0.0336309
IPO9	0.165021	0.0487825
VAV1	0.172734	0.019736
ACADVL	0.173863	0.0393492
IL17RA	0.176618	0.0428176
MOV10	0.177769	0.0378417
TTF2	0.178882	0.0471685
BTN3A3	0.183529	0.0358633
SLC39A7	0.189985	0.0367766
CTC1	0.190284	0.0453218
IER2	0.190839	0.031165
PLEKHJ1	0.192342	0.0396682
NCAPH2	0.195294	0.0151131
SASH3	0.1953	0.012558
HMGCL	0.195864	0.0458866
ZNF598	0.196808	0.043959
EXOC7	0.197462	0.0214836
GMPR2	0.198344	0.0382832
KRI1	0.199601	0.041129
ATP13A1	0.200078	0.0498734
NUP85	0.200685	0.0428176
POLG	0.201217	0.0493317
MINK1	0.201786	0.043728
DTNB	0.20251	0.0458866
PSMD8	0.203345	0.0269005
BCKDHA	0.203571	0.043728
NARF	0.204812	0.00264461
HMCES	0.205732	0.0378417
SUPT5H	0.206347	0.0439757
CRTC2	0.206378	0.0469964
ACP2	0.206651	0.0187717
ZNF282	0.208305	0.0309072
LOC122438892	0.208379	0.0378417
AMPD2	0.209799	0.0342411
POLD2	0.210736	0.0254988
TBC1D10A	0.211987	0.0320489
MTMR14	0.212119	0.0378417
GPR108	0.213028	0.0254988
INPPL1	0.21406	0.00848842
E2F2	0.214637	0.00921913
LOC122431043	0.215953	0.0370499
GNB2	0.216169	0.0342411
PCIF1	0.216202	0.015874
HOMEZ	0.216232	0.0363198
COG4	0.217194	0.0440671
FAM234A	0.217391	0.0454781
VAC14	0.217799	0.0359036
PAN2	0.219168	0.0404263
CPSF1	0.220299	0.0447341
FBF1	0.220376	0.0429286
HMG20B	0.22039	0.0381224
EWSR1	0.220622	0.00876113
OCEL1	0.221611	0.0410139
PIAS3	0.223239	0.0412085
CAPN15	0.223326	0.0119684
PCSK7	0.22344	0.0182824
RAB8A	0.223491	0.0130805
LOC122432972	0.223548	0.0268521
ZMIZ2	0.223689	0.0366338
ARMH3	0.22439	0.0404022
KCNN4	0.224391	0.0446292
STAT6	0.225061	0.0231169
CHKB	0.225949	0.0435018
FASTK	0.227813	0.0403334
TBC1D10B	0.228472	0.02721
GALNS	0.22881	0.0238117
OSBPL2	0.229169	0.0177709
SHKBP1	0.229253	0.0403841
BCKDK	0.229407	0.0381886
NLRC5	0.229683	0.00341909
MEGF8	0.229805	0.0232361
LOC122441498	0.229951	0.0396682
HAUS4	0.229968	0.019655
BRMS1	0.230741	0.0353716
CHPF2	0.231508	0.0236027
LIMK2	0.232373	0.0320023
GIT1	0.232838	0.0447371
GPR137	0.232971	0.0357145
THTPA	0.233198	0.043728
SIDT2	0.235218	0.0170794
IL12RB1	0.23586	0.0349154
TDRD7	0.235997	0.0305957
GALM	0.236083	0.0368496
MZF1	0.236586	0.043959
ARHGAP4	0.237131	0.0227618
LOC122439288	0.237999	0.0443183
RGS19	0.238008	0.0328996
TARS2	0.239005	0.00939599
NELFB	0.239341	0.0231756
NAPA	0.239348	0.0304713
SLC4A2	0.24142	0.0416624
SPSB3	0.241468	0.0264313
RALBP1	0.24301	0.0309023
ZNF133	0.243268	0.0197303
NUAK2	0.244338	0.0454781
PEX16	0.24437	0.0109014
TACC3	0.244724	0.0487825
TRABD	0.245457	0.0179669
ABHD4	0.245572	0.0123889
SPATS2	0.246522	0.0364582
EML3	0.247007	0.00821836
WDR24	0.247474	0.0353031
SMG9	0.247739	0.0207219
OSBPL7	0.247916	0.028682
YIF1A	0.248416	0.00876113
TUT1	0.251521	0.0199834
ALAS1	0.251714	0.014764
CTNS	0.252268	0.0359165
IRAK1	0.252965	0.0211362
AP1G2	0.253122	0.0178994
IRF1	0.253184	0.00615348
MAP1S	0.253888	0.0418171
ZNF862	0.254057	0.0349154
DCAF11	0.255047	0.0179669
MTX1	0.257015	0.0186886
LRRC45	0.257437	0.016893
APOBEC3B	0.25766	0.0160186
SH3GLB2	0.25779	0.0397597
PLEK	0.258304	0.0104041
TMEM214	0.258626	0.00833896
GGA1	0.258892	0.0228939
TPI1	0.258908	0.0466115
OAZ2	0.25905	0.00838006
MAFG	0.259598	0.0391556
LZTR1	0.26009	0.010721
BID	0.260917	0.00821836
ALDH9A1	0.261056	0.0155634
SPHK2	0.261729	0.0368496
TEP1	0.261841	0.014764
NEURL4	0.26332	0.00639287
ARSA	0.263436	0.026454
NAV1	0.263515	0.046051
IL2RA	0.263811	0.00416516
PIGV	0.264169	0.0113557
DPAGT1	0.264283	0.0100577
ARL6IP4	0.264401	0.0403841
OGFR	0.265091	0.0108734
GMPPA	0.265207	0.014764
LAP3	0.265788	0.0181328
SPIRE2	0.265945	0.0117526
RPS6KA1	0.266243	0.0403841
SLC35C2	0.267063	0.047545
TRMT61A	0.26723	0.0411879
GALNT6	0.267332	0.0130805
ASRGL1	0.268193	0.0339784
TFE3	0.268296	0.000912331
ALG12	0.268858	0.016893
ABCD1	0.269149	0.043959
ARRB2	0.269551	0.0249845
SNAPC2	0.269945	0.0314488
TBC1D17	0.270082	0.0353716
C2CD2L	0.270574	0.0396436
RRBP1	0.271287	0.0177709
TECPR1	0.271358	0.0267067
ATOX1	0.271519	0.0438832
PPM1M	0.271838	0.0235111
HDAC7	0.271875	0.0186886
ERAL1	0.273868	0.0149697
MLST8	0.273933	0.0467133
SMPD1	0.274989	0.0218374
PKM	0.275076	0.0365248
TOE1	0.275196	0.0207219
SHMT2	0.27549	0.028682
LOC122439966	0.275577	0.0272204
AKT1S1	0.276765	0.033572
GBA	0.27695	0.0128796
ADCK5	0.277202	0.0309023
CC2D1A	0.277715	0.00968891
GORASP1	0.278198	0.0260079
SCYL1	0.278468	0.00234909
LLGL1	0.278681	0.0232361
ZFPL1	0.279352	0.00921913
HCK	0.280296	0.0279479
CLN3	0.280773	0.00237428
RIPK3	0.281027	0.0273858
RBM3	0.281158	0.00848842
DGKQ	0.281655	0.0339784
LMBR1L	0.281702	0.0081146
PIP4P1	0.281742	0.00888361
LENG8	0.282125	0.0414261
BRF1	0.282438	0.0118352
MRPS18B	0.283388	0.0404168
XAB2	0.283728	0.00208535
PLD4	0.284031	0.0243944
TWNK	0.284585	0.0012244
ARHGAP22	0.285251	0.0451808
TRIM21	0.286192	0.00108274
AKR1A1	0.286505	0.0369569
ACAA1	0.28668	0.0171006
MID1IP1	0.286793	0.0100686
AOAH	0.286902	0.0454781
TELO2	0.287035	0.0168207
HEXD	0.288499	0.0188828
FANCE	0.289028	0.00278761
CNPPD1	0.289369	0.00358374
SCAND1	0.289622	0.0228939
GRAP2	0.289743	0.0342411
SARS2	0.28983	0.0346662
LOC122421341	0.290475	0.0429286
NDOR1	0.290693	0.043959
FHIP2B	0.291426	0.012558
LPCAT3	0.292273	0.0260986
GNA15	0.292547	0.0231169
FBXL5	0.292753	0.0215477
SLC48A1	0.293514	0.0259654
SLC12A7	0.29362	0.0155029
HPS1	0.294146	0.0170794
OPTN	0.295384	0.015295
EMILIN2	0.295431	0.0405833
PPOX	0.296281	0.0410259
ZNF414	0.296479	0.0137559
STARD8	0.296752	0.0178604
RNF123	0.296827	0.00382899
SPATA32	0.297668	0.0141732
LMF2	0.29794	0.0116988
HK3	0.299151	0.00921913
UNC93B1	0.299539	0.0416412
KHNYN	0.299786	5.12742273456738e-05
MAPRE3	0.299824	0.0236027
LRP10	0.300095	0.0347028
HPS4	0.300567	0.0104895
PLA2G7	0.301144	0.0164665
RBCK1	0.302166	0.00209858
CRY2	0.302698	0.012558
PLIN2	0.30292	7.42723800639973e-05
WDR83	0.303389	0.0330591
FBXW5	0.30374	0.0171852
SLC52A2	0.30455	0.0130805
MVD	0.30475	0.0454781
LOC122432977	0.304819	0.0466115
TUBGCP6	0.305025	0.00209858
LRRC14	0.305344	0.00332783
NPRL3	0.306115	0.0454353
PMPCA	0.306969	0.0169341
RIN3	0.308322	0.0100577
KLC4	0.308391	0.00808657
AMDHD2	0.308461	0.0239768
FERMT3	0.308542	0.0156596
SLC12A9	0.308679	0.0149697
PPP1R37	0.309332	0.00503529
STAT2	0.310294	0.000101879
SCPEP1	0.311254	0.0113085
HDAC5	0.311376	0.00892967
NUBP1	0.311716	0.001849
LOC122443316	0.311942	0.0176596
ACADS	0.312372	0.00958156
FUS	0.312742	0.00437697
SOWAHD	0.313661	0.0493863
MEFV	0.314488	0.0137247
PLEKHO2	0.314602	0.000740012
SPI1	0.315124	0.0170794
NAGA	0.315741	0.0371327
ATP13A2	0.316878	0.00284859
IRF5	0.318066	0.00627758
CDK10	0.31835	0.00278761
MAPKAPK3	0.318752	0.00647369
TAP2	0.319035	0.00460948
MAST2	0.319569	0.0362811
LOC122443181	0.320017	0.0186886
LOC122448047	0.320286	0.0443591
NUDT17	0.320482	0.0460873
LOC122452418	0.320551	0.0272204
RELB	0.320816	0.00210521
ARAP1	0.32125	0.0187717
PLEKHG3	0.321364	0.0359036
NCKAP5L	0.321982	0.00838006
MRPL43	0.322335	0.0306401
CDC42EP4	0.322943	0.0100577
TBL3	0.32314	0.0127518
MAN2C1	0.323636	0.0118352
FOXP3	0.32439	0.0142005
LOC122433328	0.3249	0.000135887
SEPTIN5	0.325115	0.0433459
XKR8	0.325143	0.0233585
IKBKE	0.325148	0.0346871
SLC37A2	0.325276	0.0249134
NCAPH	0.326291	0.0307118
PREB	0.327796	0.00525585
MICALL1	0.327908	0.0153494
LOC122420775	0.328507	0.0384223
KLHL17	0.328641	0.00848842
STAT1	0.328883	0.0100577
UNG	0.330235	0.00397199
PVRIG	0.330769	0.0487953
BAX	0.331021	0.0053633
PACS1	0.331119	0.0342411
STOML1	0.333171	0.0396682
RNF114	0.333493	0.000376196
KPTN	0.333576	0.0177709
IDUA	0.333642	0.0130805
CXCR3	0.334691	0.0473471
FDXR	0.335088	0.0260986
DNASE1L1	0.335438	0.0178303
IFI35	0.33592	0.00958156
PGAP2	0.336059	0.0064975
CTSB	0.336733	0.00848842
NFKBID	0.337044	0.0347028
TAL1	0.33713	0.0131915
ARID5A	0.338124	0.0187048
FMNL1	0.338168	0.0160487
NAGLU	0.340559	0.026502
CASP1	0.341313	0.0342411
FGD3	0.341997	0.00379207
FBXW4	0.342331	0.00838006
PARP12	0.342408	0.0186886
POLL	0.343076	0.0117526
CMTR1	0.343202	0.000115076
LOC122429635	0.343443	0.0100577
NCF1	0.345372	0.0454781
NEIL1	0.345604	0.0358633
EIF4EBP1	0.34575	0.0441752
TNS3	0.346066	0.0358633
CCDC88B	0.346823	0.0342411
NTMT1	0.347129	0.0139264
SEMA4F	0.34717	0.012558
G6PC3	0.347497	0.00290356
DTX3L	0.347648	0.0367766
UCP2	0.347865	0.0388878
ADAP1	0.349191	0.0307292
SIRT6	0.349258	0.00703719
ENGASE	0.350277	0.000275694
BCL3	0.350973	0.0163131
LTBR	0.351535	0.0179001
TTLL1	0.352675	0.0364582
ZC3H12A	0.353099	0.00551975
ADAR	0.353518	0.0119786
CYTH4	0.353897	0.000964529
CBLN3	0.355916	0.0155634
LOC122421677	0.355939	0.0230329
EML2	0.35679	0.00756551
CARD9	0.357299	0.00538253
SLC2A6	0.358151	0.0301916
APOBR	0.358784	0.0264313
MPP1	0.35905	0.00224119
LOC122434363	0.362542	0.0187717
LOC122443876	0.363751	0.0443002
PLD3	0.366937	0.0327369
TMEM179B	0.366947	0.00876113
ABHD8	0.367292	0.00358374
PDLIM7	0.368078	0.0210297
INF2	0.370716	0.0156474
KIF22	0.371385	0.00808657
PRICKLE3	0.371443	0.0227649
FES	0.372222	0.0130805
CNDP2	0.372435	0.00341909
RNF31	0.373391	3.0262769323892e-05
LOC122433203	0.37395	0.000778948
IRF8	0.375301	0.0100577
VPS9D1	0.375481	0.00821836
ATG2A	0.376768	0.0425507
TCTA	0.377323	0.000254211
NUDT18	0.377963	0.0079673
GSDMD	0.378203	0.00224119
LOC122436914	0.380694	0.0123432
ASAP3	0.380737	0.0342411
NFE2	0.380769	0.0064975
FGD2	0.381561	0.0171006
LOC122426335	0.382427	0.0113733
GALK1	0.382894	0.00958156
ARHGAP21	0.38366	0.0215314
RASSF4	0.383971	0.00653189
MSRB1	0.384974	0.0301286
NFKB2	0.385066	0.00602123
EME2	0.386856	0.042251
RTEL1	0.387715	0.000706219
CCDC28B	0.38825	0.0270978
GIPC1	0.389154	0.0057387
ACBD4	0.389345	0.0454781
ISG20	0.389508	0.00511196
CENPB	0.389988	0.00958156
NAT9	0.390377	0.0264313
MBOAT7	0.390703	0.0140842
SH3BP2	0.392083	0.00540828
PPM1N	0.39212	0.0374594
SHFL	0.392293	0.00070305
NR1H3	0.392951	0.0363198
LOC122427681	0.393228	0.0117542
BRAT1	0.394765	0.0125474
ADA	0.395041	0.0177709
TMEM106A	0.395113	0.0010914
CTSZ	0.395893	0.00351751
LMNA	0.39649	0.0157097
LOC122431079	0.39719	0.00156726
LYL1	0.398069	0.00602123
NDRG1	0.398076	0.0113085
PFKFB4	0.398174	0.00511196
GADD45B	0.40247	0.0339784
FGR	0.402809	3.88162967444064e-06
MXRA7	0.403302	0.00623336
LOC122427482	0.405509	0.0103362
KIF1C	0.405771	2.25367393634591e-05
GRN	0.406867	0.0156596
BAHCC1	0.407604	0.0142809
SLC2A8	0.407888	0.0181328
PLCB3	0.409419	0.00278761
RNF213	0.410993	0.00967009
LOC122440531	0.411372	0.0117674
LOC122437619	0.411957	0.0220965
C13H1orf21	0.412846	0.0155634
NR2F6	0.412899	0.00924633
TSPAN4	0.413305	0.0457727
CLCN7	0.413814	0.00127798
SPSB2	0.415337	0.00369682
XAF1	0.415375	0.000350613
PGGHG	0.415542	0.00104461
RHBDD3	0.415833	0.000135887
PARP10	0.416636	2.33659072751067e-05
GAB2	0.420829	0.0142227
LOC122437839	0.423118	8.50382508252964e-05
CLYBL	0.423274	0.0410139
ZNF768	0.423504	0.000859123
TASL	0.42439	0.0218374
MCOLN1	0.426213	0.00580842
BBC3	0.428374	0.0187717
ARHGEF10L	0.428906	0.0178974
FTL	0.429502	4.48706123851847e-05
EPHX3	0.431647	0.0443591
PTPN23	0.432345	0.000199346
LOC122445080	0.433292	0.0403841
GTPBP2	0.435195	6.85325258625718e-05
ROGDI	0.436322	0.0177546
RECQL4	0.437052	0.0107695
SDS	0.437309	0.00976922
CFAP410	0.437331	0.00152941
ABI3	0.439947	0.0116988
TBC1D2	0.441409	0.0472623
EVI2B	0.441926	8.52420714242872e-05
LXN	0.442835	0.0306202
NRGN	0.444992	0.0353716
HSH2D	0.445857	6.14012755713041e-05
LOC122451955	0.445861	0.00848842
SPATS2L	0.446452	0.00397199
OXSM	0.447913	0.0456638
NUCB2	0.447933	0.00503529
BCL2L1	0.448038	0.0164665
ZNF784	0.448093	0.018518
COMTD1	0.450447	0.0259654
LGALSL	0.450507	0.0232327
CBY1	0.450915	0.00534109
ABCA3	0.452025	0.00108546
GGCT	0.454578	0.0172563
NDRG2	0.456167	0.00281051
PSEN2	0.458147	0.0487825
LAG3	0.458815	0.0225865
RUSC1	0.458884	0.00400361
TNFAIP2	0.459274	0.0196955
SLC7A7	0.461176	0.0182476
USHBP1	0.466534	0.00838006
MMP14	0.467102	0.0128796
IRF9	0.469712	1.49296832831124e-07
VASH1	0.475367	0.0261812
LPIN3	0.477	0.0149697
SLC25A20	0.477687	0.000840812
LOC122423128	0.478615	0.0396816
HERC5	0.480041	0.0453517
SPHK1	0.48147	0.00100483
BPGM	0.48171	0.0178303
SNX33	0.482619	0.0197303
GPX3	0.485156	0.0454781
LOC122426544	0.485519	0.0113085
ILK	0.486248	0.0454781
IFFO1	0.487166	0.000134853
LOC122442443	0.487465	0.00167161
TMEM86A	0.488024	0.000254211
TJP2	0.496742	0.0404022
ALPK1	0.496777	0.000121161
LOC122425091	0.496955	0.00121709
LRP1	0.498953	0.00244674
HDAC11	0.499046	0.00281051
SLC6A9	0.502713	0.000709942
EHD3	0.503723	0.0130805
HIP1R	0.504284	0.000163762
LOC122447932	0.504346	0.0363198
SH3BGRL2	0.504848	0.0199926
MTURN	0.511573	0.00290356
ABHD12	0.515697	0.00159771
HLX	0.51883	0.00041296
ACHE	0.530698	0.000257178
SCARF1	0.531886	0.000868827
SLC49A3	0.533525	0.000369068
CLCN2	0.533731	0.0113557
G0S2	0.539316	0.0187717
DUSP2	0.541262	0.00344571
CD274	0.543166	0.0172563
NINJ1	0.544923	0.000304097
MCEMP1	0.546022	0.00112251
LOC122431985	0.548808	0.0473471
FKBP6	0.549799	0.00979925
SLC46A2	0.55112	1.48214836043258e-06
ZNFX1	0.55902	0.000348561
FOXS1	0.56045	0.00939599
DNAH17	0.564592	0.000168308
TCIRG1	0.567113	0.000270839
PLEKHA4	0.571791	3.84278353597377e-05
P2RY6	0.57405	0.000304161
XPNPEP2	0.574111	0.0379408
F11R	0.578277	0.0113557
DDAH2	0.582721	0.00838006
LOC122446222	0.582968	0.02721
SLFN14	0.584243	0.00512742
GNG11	0.586077	0.00216029
PML	0.589347	1.48214836043258e-06
MARCHF2	0.602549	0.00922117
MAP3K6	0.604777	0.00308536
NRP2	0.604958	0.000546926
TLN2	0.605589	0.000254211
LOC122423793	0.607052	0.0133715
BATF2	0.60813	0.00210521
LOC122449425	0.608585	0.00953079
RAB7B	0.613834	0.0347028
LOC122448297	0.613886	8.50382508252964e-05
ABTB1	0.616696	0.000141272
RASA4B	0.620009	0.0253208
SERINC2	0.620328	0.0012244
LOC122430223	0.622579	0.00244674
LOC122436717	0.625484	0.000336953
TGFB1I1	0.628956	0.000578864
PARP9	0.644338	7.02098644421188e-06
ZCCHC2	0.645054	1.01630787877377e-05
LOC122448416	0.650523	0.000726527
FCGRT	0.653179	1.48214836043258e-06
IER5L	0.654845	0.00113626
TST	0.657067	0.00711691
HERC6	0.661057	0.0156764
TRANK1	0.661413	5.22136626418762e-08
CTXN3	0.663485	0.00278761
ADAMTS2	0.664517	0.0335706
AQP9	0.666536	2.71722418374304e-07
ZNF821	0.666651	0.000345412
MPIG6B	0.673254	0.00278761
PTGIR	0.68634	0.0137983
LOC122448780	0.686647	1.48214836043258e-06
C13H1orf115	0.687237	0.000233038
IL4I1	0.690991	0.0186886
HSD3B7	0.694915	0.0292128
LOC122423800	0.695467	0.00358374
RPS6KL1	0.698392	5.12742273456738e-05
CEBPZOS	0.703271	0.000254211
UBA7	0.703902	1.51968032119756e-08
TMEM140	0.704354	2.54586828141081e-08
CCRL2	0.707231	0.000912331
ITGA2B	0.711309	0.0155634
HSPB6	0.715805	0.0355541
SRL	0.724206	0.000497256
PHOSPHO1	0.724759	0.0104895
TSKU	0.728982	2.33965401830551e-05
ALDH1A1	0.764424	0.020038
PHF21B	0.777377	0.00589357
UBE2L6	0.780555	4.54002004776303e-07
IFIT2	0.792264	0.0346662
LGALS9	0.799956	1.49223839013313e-09
LOC122441204	0.812192	0.00210521
LOC122454755	0.822177	0.0403841
LOC122419678	0.830726	1.11141165407529e-08
IRF7	0.832202	2.18388541148322e-07
FOS	0.843429	0.0416412
SNTA1	0.84445	0.00128161
MEGF11	0.84923	0.00224706
CAVIN3	0.883772	0.0082316
LOC122455194	0.903635	0.0162896
RIPOR3	0.915588	9.32603950345918e-05
LOC122428204	0.957671	0.0397489
CMPK2	1.0607	3.88162967444064e-06
LOC122446174	1.08268	0.00275752
GPR84	1.11841	1.11141165407529e-08
MYL9	1.17326	0.0109014
IFI44	1.2821	5.82616626301815e-09
MX1	1.286	0.0151131
ZBP1	1.31965	1.08517732224232e-15
DHX58	1.38969	2.08734275998362e-10
IFI44L	1.47673	6.78475481783309e-09
EPSTI1	1.49039	1.74158139082736e-09
RSAD2	1.5523	0.00400361
LOC122422833	1.55732	1.63006392327667e-05
AGRN	1.63056	2.77918890759495e-12
IFI6	1.89714	9.05079316591728e-20
HES4	2.00521	7.18744205009803e-05
MX2	2.04167	6.78475481783309e-09
LOC122422844	2.12721	8.028946850158e-08
LOC122422854	2.15045	1.34882267914034e-06
ISG15	2.20603	1.11141165407529e-08
LOC122422848	2.23169	1.11141165407529e-08
