# Supplementary material for: Peripheral transcriptional responses to experimental SARS-CoV-2 inoculation in North American Elk cows and calves
Source: Research Square preprint supplement (doi:10.21203/rs.3.rs-6505643/v1), 2025-05-15
Supplement: Supplementary file 8 [file bf07545a2811405d6b1d6894.xlsx]

## Sheet: downregulated
Supplementary Table S9 - Downregulated genes in Adults (D0xD5)
gene_id	log2fc	padj
VIM	-17.7789	5.10117466670571e-84
RIPOR2	-16.8177	1.91229116026617e-58
SDS	-16.48	7.2084079601087e-211
PCBP2	-16.2781	4.82194243525365e-54
LOC122430536	-16.1866	1.91538278262988e-116
C5AR1	-16.1604	6.75946076420456e-96
SAMHD1	-15.8752	2.29440281764746e-116
SRRM2	-15.5645	4.23378011536901e-67
RPS11	-15.561	7.54100168856574e-57
SLC25A6	-15.5563	2.56185407782604e-82
ASRGL1	-15.399	2.02681750765333e-64
EMP3	-15.3494	3.92057675204202e-46
RPL32	-15.346	8.86789112405191e-51
FTL	-15.2945	3.90491936576783e-76
IQGAP1	-15.1352	8.28294446355306e-83
LOC122429552	-15.0492	8.3147610793041e-46
IFNGR1	-14.9227	1.3845331074858e-40
TCF7	-14.9148	2.91955168118482e-56
IL13RA1	-14.9041	1.82987227327553e-41
STK10	-14.8953	3.13462510705366e-61
ATG2A	-14.8325	1.62701129643422e-42
RCC2	-14.627	1.69795907254388e-42
TUBB	-14.6036	2.13140411556808e-81
LOC122423438	-14.5775	2.93436814455718e-136
OGA	-14.5003	3.0456429776896e-40
IL2RB	-14.4933	7.13364914746837e-41
TAP2	-14.4721	6.43489799757911e-41
LOC122433069	-14.4674	1.41118364885852e-42
MARCHF6	-14.3564	5.26821061280691e-44
CCNI	-14.3187	9.60540053991988e-54
ZYX	-14.3158	3.00276110126826e-114
TBXAS1	-14.3057	1.62556184719298e-41
RELA	-14.3032	1.01537399441427e-38
CCND3	-14.2919	8.25394499084988e-87
PSMD13	-14.2791	2.33997313760684e-39
PAPOLA	-14.2647	1.78689190210236e-43
TENT5C	-14.1238	1.03353387082996e-37
NOTCH2	-14.0895	4.44280347449143e-82
LOC122420173	-14.0405	1.38178567491061e-40
SYK	-14.0388	1.0006806567186e-59
RPN1	-14.0066	1.8814568944551e-51
DDOST	-14.0056	2.30793079179238e-38
S100A11	-13.9855	6.6288107058313e-46
KCTD20	-13.955	1.76200866543022e-42
RAB7A	-13.949	1.70626389586436e-59
PICALM	-13.899	6.07435774892512e-79
IL4R	-13.8854	2.64966009216478e-50
BRD2	-13.8761	6.58909147017991e-115
IFRD2	-13.8692	9.70517991279524e-22
DCAF12	-13.7651	7.60938290693955e-41
ARF3	-13.764	7.22323006378749e-51
RPLP2	-13.7527	2.31176095267958e-42
LOC122434151	-13.7489	2.44966494677679e-63
AGPAT1	-13.6934	4.27311084806912e-37
SELENOW	-13.6752	8.35291103907947e-38
SOD2	-13.6682	2.38487477206439e-151
ATP6V0C	-13.6511	5.19121135340949e-81
CLIC1	-13.6075	1.28323141891839e-64
NPLOC4	-13.58	2.16847055304383e-37
ANTXR2	-13.5746	5.70692588610048e-43
UBE2R2	-13.5454	3.03943335934342e-38
EHMT2	-13.5206	1.83699715185881e-34
SP140	-13.4839	1.39987983013908e-67
PRPF40A	-13.4819	3.58116983058292e-35
SUSD6	-13.4814	7.30208825156246e-45
SF3B2	-13.4777	7.10375126223701e-67
HSP90AB1	-13.4762	1.8725828862774e-121
SMARCC2	-13.4635	3.88125354720158e-46
PLEC	-13.4576	9.02015948480889e-98
SUCLG1	-13.4416	2.44133886122156e-37
LOC122421712	-13.4225	1.23466641453696e-49
FOXP1	-13.4217	4.95031905689233e-48
ARL5A	-13.4087	4.44125067244021e-33
SLA	-13.3988	3.15854136122749e-87
TFDP2	-13.3725	1.73859859878863e-34
ARHGEF6	-13.3682	7.9298993004871e-50
CAPNS1	-13.3642	1.98397943235729e-119
MSN	-13.3477	9.20065783142899e-148
TM9SF2	-13.3417	5.60591343480972e-43
MAPRE2	-13.3276	9.94737784797178e-43
RBBP6	-13.2543	3.67025068448207e-35
SNRNP200	-13.2517	7.43751619911925e-84
C5AR2	-13.2412	8.5169284320812e-85
TNRC6B	-13.2393	1.61118026901003e-47
TAB2	-13.2274	8.76858287723472e-35
YWHAG	-13.2075	2.02894308695572e-44
CDC42	-13.2064	7.07131293712783e-103
LOC122420817	-13.1891	1.223485592215e-123
LAPTM5	-13.1873	NA
TSC22D3	-13.1665	4.50993705718773e-227
GTF3C1	-13.1626	1.77362268387651e-35
OARD1	-13.0803	4.21793129989652e-34
LOC122420181	-13.0633	3.6582871468706e-75
SF3A2	-13.0065	5.41175034563344e-33
NKTR	-13.0029	1.27940608713248e-35
SERF2	-12.991	2.23314514883862e-53
CHMP2A	-12.9737	7.92910502622403e-33
STRN4	-12.9717	2.27844102268129e-43
SCARB2	-12.9707	6.63256166517818e-34
CDA	-12.9649	1.1189185661568e-109
OXA1L	-12.9508	3.65272270000974e-33
NCAPH2	-12.9448	4.6384446274924e-32
FBXL5	-12.9316	1.47802573883073e-67
AFG3L2	-12.9177	2.72993559485951e-33
PPM1H	-12.9057	1.35512353635145e-33
GOT2	-12.8974	3.61513251831954e-43
ETFB	-12.8973	1.40637029266412e-40
RTN3	-12.8887	4.85469369309324e-61
LRP1	-12.8605	8.37617426533327e-31
TBC1D10B	-12.8407	2.71124591004727e-70
LOC122433251	-12.8028	1.57795896699886e-79
PPIG	-12.7972	1.34839363523205e-34
ORMDL2	-12.7963	3.51822297446159e-33
LYPLA2	-12.7749	2.09812033227496e-45
CBX5	-12.7672	6.73198857826165e-44
ST6GALNAC2	-12.757	8.24474002432774e-35
ATP5MC2	-12.7442	1.76745518834611e-80
NLRC5	-12.7296	4.81986293615659e-152
NAP1L1	-12.7289	9.98919006703149e-52
NDUFA3	-12.718	6.82529488201977e-32
WNK1	-12.7097	2.99340685867687e-73
LOC122433063	-12.6912	3.33140256985074e-32
PTPA	-12.6899	1.32953468461708e-57
CRTC3	-12.6864	2.3873356471772e-43
ARRDC4	-12.6753	1.16158912673402e-35
NUDT3	-12.6578	1.97801403344896e-60
DNAJC8	-12.6314	2.1755562788177e-40
ARIH2	-12.6116	6.27767297691647e-33
RBCK1	-12.6061	7.54940621519886e-40
YBX3	-12.6008	2.44460927691961e-39
PRMT1	-12.599	1.39035360120369e-40
GTF2I	-12.582	9.81145866704386e-44
OTUB1	-12.5706	9.4356701752437e-31
LOC122421229	-12.554	1.71892054631791e-34
LDHB	-12.5519	1.13361225782409e-41
PJA2	-12.5408	5.05645536810504e-30
FKBP11	-12.5348	3.96931460997322e-56
LOC122426699	-12.5199	1.17312804145644e-161
HNRNPR	-12.5196	5.06764706458097e-43
UBP1	-12.5159	4.34331584922466e-52
BZW1	-12.5132	3.94201171643926e-31
HMGA1	-12.5114	3.25345519856751e-74
RHOT2	-12.4718	5.13455718058421e-31
SMARCA2	-12.4556	3.32799825742467e-45
PSMB8	-12.4298	2.81529221838402e-145
ZNF217	-12.3871	1.43857113901078e-33
ECH1	-12.3853	1.53977254907838e-29
LOC122435848	-12.38	2.86480910110511e-25
TBC1D1	-12.3538	9.76048622486077e-42
DOCK10	-12.3503	1.16448463711909e-64
WDR81	-12.3436	2.15003084796034e-40
RNF20	-12.3153	1.12171329014286e-39
EGLN3	-12.3028	2.54175291672931e-30
C28H6orf89	-12.3014	8.45750696195406e-38
MYL6	-12.2919	2.07350244982411e-107
PECAM1	-12.2876	5.84134683504095e-92
PLIN2	-12.2848	4.18999168111893e-42
RARG	-12.2821	1.38422162942146e-76
ZMYM3	-12.268	6.73597231504485e-32
LMTK2	-12.2531	1.56404521867964e-29
PRCC	-12.2531	1.29256125217714e-40
MALT1	-12.2466	5.12570446567193e-29
ZBTB40	-12.2281	1.57642541870693e-29
SLC16A3	-12.2229	2.74009760369007e-93
STK38L	-12.2143	5.70866694495468e-31
KLK1	-12.198	1.22107231665724e-28
RASSF2	-12.193	2.70807960325563e-41
AKT1	-12.1877	2.81483801408464e-117
TNS2	-12.1669	7.49994996547135e-28
LOC122429575	-12.1665	1.04010952185729e-26
VDAC3	-12.1644	2.84296050478871e-35
ATP6V0E1	-12.162	3.00030300329148e-66
SNX1	-12.1273	2.61568954695073e-39
RER1	-12.1245	2.03470042148323e-36
S100A10	-12.1071	2.70453293140812e-102
TGOLN2	-12.1034	9.94791330157887e-69
PRPF19	-12.1028	2.52529565281243e-60
NUCB1	-12.0955	2.20378355695815e-137
LOC122424021	-12.0902	1.35027791355358e-28
YBX1	-12.0849	2.85788882371683e-53
STEAP4	-12.0777	2.80293219478914e-91
KIAA0930	-12.055	1.28453809913385e-110
NUDT4	-12.0465	9.04319797670391e-29
FADS3	-12.0334	9.55409490286869e-29
MPST	-12.0322	5.99986248862901e-27
MAPK3	-12.0033	2.17180254093841e-51
PPT2	-12.0015	5.84087215502688e-29
CNOT2	-12.0002	6.04265567987553e-36
ADA2	-11.9975	1.12921010981204e-87
SBNO1	-11.9815	1.24879350658101e-30
CD47	-11.9803	1.58809956482115e-49
SENP3	-11.9791	6.39641254794983e-37
TOM1	-11.9645	1.77293342601489e-29
CRIP1	-11.9268	2.1650249186149e-105
HNRNPA3	-11.9096	6.77966165060995e-85
WDR13	-11.9052	2.33820707587898e-28
TBX21	-11.9021	1.3899551452577e-51
LOC122429743	-11.8828	3.23995046503047e-26
MAP4	-11.8801	1.20024465104872e-86
TIAM1	-11.8796	4.1513571468651e-36
SLC25A29	-11.8732	1.05877411940974e-28
CDKN1A	-11.858	3.15721370037547e-32
ITPK1	-11.8553	1.14607017692745e-50
PTGER4	-11.8535	3.78253135605586e-46
CNOT7	-11.8528	1.20526586493848e-28
PRR5L	-11.8501	3.07385387849549e-40
NMT1	-11.8433	4.53964870398889e-63
SPCS1	-11.8304	2.04400041670294e-32
ANKRD54	-11.8263	4.27544296697745e-28
SLC7A7	-11.8181	1.31367376701897e-55
RAB44	-11.8137	5.96760424130441e-27
NMI	-11.8101	7.06210189351697e-29
SYNE3	-11.787	1.76962055714536e-50
PPP5C	-11.7861	5.33105880495522e-28
TRIM21	-11.782	6.93858390440473e-38
FLOT1	-11.7561	7.77565009946675e-79
SLC25A20	-11.7518	1.50128994091793e-27
IFIH1	-11.7491	2.2392716994698e-52
TREM1	-11.7443	8.56825678608624e-125
WASHC1	-11.7352	2.18016973204149e-48
PISD	-11.7302	6.26442977447058e-37
ZNF385A	-11.7298	5.30074824751539e-54
NFE2	-11.7239	3.65702577547851e-102
SERPINB7	-11.7224	3.99109649808771e-24
LOC122435930	-11.7164	1.11056819238629e-33
GSPT1	-11.7115	1.50572269157166e-59
ALDH16A1	-11.6977	8.65347631168853e-35
PPP2R5B	-11.6971	8.3446728666173e-27
VCL	-11.6969	1.68586298343392e-83
STAM2	-11.6917	7.13442371842052e-26
RALA	-11.686	1.06733716493963e-27
OPA1	-11.6846	1.14848592745897e-29
ABHD2	-11.6755	NA
SYNE2	-11.6716	6.11691056245938e-30
PMS2	-11.6654	4.63326904710773e-28
H1-2	-11.6568	1.354511639471e-181
P2RX5	-11.6566	7.09115064533707e-60
DPP4	-11.6333	8.17066273453644e-27
EGLN2	-11.6306	5.17152192215653e-86
LOC122423473	-11.6205	3.19893780761781e-47
LOC122421649	-11.6146	2.54277198312007e-117
RASA1	-11.6124	5.58559959238554e-26
TMEM50A	-11.6086	1.15740198035803e-28
VTI1A	-11.6031	3.50467547624468e-27
SPCS3	-11.6016	7.08708181907852e-44
ZNF710	-11.6011	5.52745181315942e-44
PTH1R	-11.5793	3.3513927774543e-66
DSEL	-11.5651	7.24504085485656e-28
LOC122420232	-11.5572	2.58283408753241e-26
AIFM1	-11.5397	8.00763564318827e-35
GSK3A	-11.5325	1.1826932411122e-90
NARS1	-11.5318	8.02934885489693e-61
ANKRD17	-11.5315	8.52485773794088e-62
LOC122423585	-11.5233	3.79722487905691e-31
SCAMP2	-11.5164	7.07104444135638e-104
GET4	-11.5119	2.7124572763979e-28
TNPO1	-11.5092	5.63461883714314e-24
PHLDA3	-11.5082	2.60538295855457e-26
EXOC2	-11.5023	2.51419152419577e-34
TBXA2R	-11.4978	5.08355076639681e-33
HTATSF1	-11.496	6.87240265775402e-32
POU2F2	-11.4825	1.64337613588734e-78
SOCS3	-11.4634	7.34392623769855e-72
GABARAPL1	-11.46	1.05510028283095e-32
C32H16orf54	-11.4577	1.26893719196774e-224
VPS35	-11.4475	2.02650573407745e-62
PLCL2	-11.4419	9.51763547865572e-143
MFNG	-11.4404	1.834138273519e-127
SASH3	-11.439	5.37973095724955e-167
ANXA3	-11.4271	6.26650171485272e-52
TCF20	-11.4248	6.19836838355004e-97
XPOT	-11.4157	1.28845587054561e-30
C16H5orf51	-11.412	7.83231821437742e-29
APPL1	-11.4117	3.41661033172075e-25
LOC122420597	-11.4084	1.02613946589774e-29
SHMT2	-11.3975	3.09634509565129e-35
SCAF8	-11.3923	5.25164797099137e-59
LOC122424900	-11.3894	1.23912930280383e-25
GAPDH	-11.3893	9.52827630482849e-152
GPX1	-11.3803	2.86673984962933e-202
ADH5	-11.3803	2.0871312187133e-29
NAA10	-11.3759	1.48686631888907e-25
KIF2A	-11.3748	5.58752367262538e-29
RTN4	-11.3734	8.18465037859747e-50
RNF24	-11.3716	2.93058427730423e-67
KNOP1	-11.37	1.36467550988064e-25
CLPTM1	-11.3402	9.41144908205328e-87
ARL6IP6	-11.322	8.90627536948504e-23
LOC122431228	-11.3085	2.11783675635577e-25
NCKAP1L	-11.3028	1.66730744602409e-194
GPR4	-11.2836	5.13750735614637e-25
EI24	-11.2832	4.47549782851293e-32
MBD2	-11.283	5.54087255799185e-91
SMG1	-11.2748	2.95849961822574e-35
NFKBIE	-11.2728	3.21068698779951e-27
ZKSCAN5	-11.2596	1.47174453921187e-25
DNASE1	-11.2482	9.4539366693976e-26
ATXN2L	-11.2317	1.53086413679912e-113
RIPK1	-11.2305	4.11938866396913e-67
WDR59	-11.2102	1.80582269038831e-27
RAC2	-11.2026	1.36045267511932e-205
PNRC1	-11.1892	4.27187127029584e-104
RABEP2	-11.1887	1.38815501292893e-24
UBR5	-11.186	6.30652346736015e-41
FGD4	-11.18	5.18332304892292e-29
RTEL1	-11.1775	1.27749243555866e-24
DXO	-11.1749	2.87611985775963e-25
NHLRC2	-11.1699	6.29104939111142e-24
KLF7	-11.1654	8.7235486371899e-49
NDUFS8	-11.1638	1.76312149727117e-33
TPM1	-11.1454	5.68694916754147e-68
NCR3	-11.1324	1.3309235772214e-24
NOTCH1	-11.1311	3.26352030967546e-72
LOC122454388	-11.1065	1.3541846765091e-26
DAXX	-11.1047	1.31153370898521e-68
PCMTD2	-11.1008	2.57312857386347e-31
PAF1	-11.0871	7.08691076045468e-97
LOC122426885	-11.0843	1.16634801862856e-29
CAPN1	-11.0813	1.27504582981555e-99
NPC2	-11.0793	3.63594120349925e-116
EEF1A1	-11.0769	3.93406364465055e-177
MOB1B	-11.0592	2.46199990372608e-23
HDAC6	-11.0479	6.42145362461613e-42
STX16	-11.0445	3.75850149289709e-34
SPCS2	-11.0372	1.20943183000983e-71
KIF22	-11.0229	1.96909121639053e-22
NT5E	-11.0194	1.6092536106673e-25
TRPM2	-11.0112	1.18085729498317e-77
PTPN2	-11.0106	9.73455550006039e-58
RNF25	-10.9997	9.21223995669432e-24
TRIM8	-10.9922	2.3597435745405e-52
ARAF	-10.9914	1.82688216531002e-78
ZBED4	-10.9893	1.88521378932122e-28
LPCAT3	-10.9775	1.28225111308326e-34
AAAS	-10.96	7.1048959325166e-32
STAT1	-10.9507	1.49437029976469e-167
SLC15A3	-10.9488	6.0519939046105e-69
TRIM24	-10.9413	2.69176866147017e-36
POLA1	-10.9328	6.58535546389075e-26
SNX14	-10.9279	5.44144831535164e-23
LOC122423221	-10.9253	1.09763387656521e-10
HPRT1	-10.9201	2.07456342578297e-26
DYNC1LI1	-10.915	5.32206492333222e-30
SNRPA	-10.9112	7.77903501687007e-31
TEC	-10.9071	3.35640755424202e-26
ACVRL1	-10.9028	7.7489042237383e-44
PGLS	-10.8829	8.43967744659814e-72
PANX1	-10.881	2.06134796175571e-25
HSPE1	-10.8786	1.27130604903047e-27
PGAM1	-10.8774	1.06035448240779e-160
SLC43A3	-10.8715	5.04324056362826e-55
TBL2	-10.8697	6.26416249226658e-55
TGS1	-10.8659	3.83968600617276e-34
FBXO33	-10.8637	1.22846654572314e-25
RAB8A	-10.8632	3.37365640122447e-99
ITGA5	-10.8567	1.82219531539683e-86
TRAF1	-10.8532	6.48945647011167e-45
LPCAT2	-10.8431	3.10364141507471e-69
LRP5	-10.8381	1.2178288765998e-23
ZNF275	-10.8269	8.14131492934051e-26
DDX3X	-10.8249	2.13258112099005e-96
COQ3	-10.823	3.48650976320664e-25
GIGYF1	-10.8178	4.35982198724398e-137
PGS1	-10.8176	1.53917950263107e-69
USP16	-10.8128	3.730810194021e-25
RILPL2	-10.8083	2.9013640627638e-59
RDH11	-10.8072	2.51855181552508e-27
APOBEC3B	-10.8049	1.03619441742072e-41
HSPB1	-10.8049	5.76931469227672e-116
PGRMC1	-10.7996	7.72338572717418e-22
LOC122420283	-10.7864	2.87894971527798e-23
TOMM40	-10.7838	1.51432570694857e-30
PEPD	-10.7733	7.79977679036593e-69
USP7	-10.7727	5.2958318951761e-165
KLHL5	-10.7694	6.4626577466965e-25
LONRF3	-10.7683	2.41346176126379e-37
G3BP2	-10.7454	2.91080432745175e-52
SNX18	-10.7429	2.15534743329866e-26
SLC25A4	-10.7345	2.00867859625748e-25
EPB41	-10.7301	7.0042565762519e-104
PPP1R3D	-10.7227	6.33032613390545e-30
CFL1	-10.7225	4.50400009235865e-166
MAGED1	-10.7148	7.53477169704283e-30
NUP210	-10.7062	3.28697096918673e-116
LOC122455145	-10.6978	6.98298419123529e-147
SRRM1	-10.6928	6.5410028299437e-132
SLC35D2	-10.6888	9.25652133585731e-26
TES	-10.6734	4.1116585702787e-29
IREB2	-10.6671	1.84800572374953e-23
LOC122435468	-10.6641	4.11510601786547e-31
SOD1	-10.6603	1.74431733530121e-71
SOX12	-10.6561	1.42681466167029e-21
NAB2	-10.6551	9.07817926824653e-22
LOC122423442	-10.6544	1.46552543541647e-155
MKRN2	-10.6516	1.03576769868156e-30
SAMM50	-10.6514	4.84509674599651e-53
DHX34	-10.6446	3.16168684001683e-87
SCARB1	-10.6424	9.67225686777316e-61
LOC122421553	-10.6383	4.98309258800727e-21
CRYBG2	-10.637	2.31463473727246e-27
BTBD1	-10.633	5.23541034039015e-27
CCDC28A	-10.6317	1.52964582282003e-24
FUCA2	-10.6282	5.64604342145759e-26
ZNFX1	-10.6234	3.64403873959138e-113
LOC122434352	-10.6129	9.22547165836697e-23
FHOD1	-10.6119	2.32393912799952e-61
SRGN	-10.6114	8.0525366330394e-122
TALDO1	-10.6093	2.54633536129363e-227
TMEM185A	-10.6049	2.94149581565634e-30
PQBP1	-10.6049	1.08258856887707e-53
PIP4K2C	-10.5996	4.83237749503777e-69
RARS1	-10.599	7.1314214466365e-26
RREB1	-10.5869	9.69317745290401e-43
SULT1C4	-10.5756	1.49009064054037e-29
CCR4	-10.5745	1.67677942579299e-25
BIN1	-10.5662	2.57939488432336e-103
NUDT7	-10.5629	2.32017758595109e-68
RDX	-10.5594	5.22214368779854e-18
PTPN22	-10.558	3.28603649836164e-25
LOC122420886	-10.5563	3.89753250443617e-74
PLBD1	-10.5551	6.65812995236055e-140
SF3B5	-10.554	5.40557228910724e-27
ZHX1	-10.5448	9.13917924004747e-21
SLC15A4	-10.5444	5.87667631613874e-77
CD4	-10.5362	7.10606129428937e-188
RASGRP3	-10.5295	3.92215024659465e-28
SLC45A4	-10.5284	1.98758736358582e-49
LOC122425174	-10.5283	1.46729089090616e-24
OSBPL2	-10.5265	8.22613326951004e-146
RHOF	-10.5248	6.85890064392067e-118
KIF24	-10.517	1.43030364813877e-26
NSF	-10.5112	1.45539875672279e-37
LOC122429330	-10.4812	1.40832625173502e-24
TGFBI	-10.4767	5.87525126447686e-192
REPS1	-10.4744	1.60720802593218e-92
METTL7A	-10.4676	1.47703585881649e-24
OGFRL1	-10.4641	8.75367113244118e-68
FARS2	-10.4603	1.70420133463307e-21
COPZ1	-10.46	1.59129401176471e-107
GNAI2	-10.4514	4.65240041704494e-305
PKM	-10.4496	1.40874943706767e-196
SMC1A	-10.4462	3.09758741139068e-142
TWNK	-10.4455	2.43302270241792e-37
GXYLT1	-10.4307	6.16075448787673e-21
ATRX	-10.4284	1.59653026479431e-55
ZNF445	-10.4214	8.86497013428646e-24
TOM1L2	-10.4197	9.06849862396386e-46
TAPT1	-10.4042	9.15209542086982e-47
UBA6	-10.3998	1.58158143658352e-20
LOC122455109	-10.3963	1.91504154729167e-18
LOC122430804	-10.3885	4.42918670242223e-64
CSRNP2	-10.3832	4.32653457370798e-28
TTLL5	-10.3763	2.9303223231984e-23
LOC122454814	-10.3713	1.55494098026072e-19
MLH1	-10.3666	5.01770860690381e-29
RBPMS	-10.3616	4.74677255364099e-36
ACAT2	-10.3601	1.79053447117643e-70
ZBTB44	-10.3597	1.97911793999919e-23
PSMB3	-10.3587	4.8975760161791e-90
PHB	-10.3499	4.13469439765171e-47
IL2RG	-10.3496	3.17561107031413e-106
RNF181	-10.3496	1.87684005015008e-43
SFT2D2	-10.3478	2.17380160055333e-48
BAZ2B	-10.3184	6.71110659168187e-26
PLAA	-10.2974	2.79222470215671e-44
RNF38	-10.2967	1.97909656532095e-74
ZNF526	-10.2957	2.91476521027279e-21
SERINC2	-10.2862	1.84094810564198e-34
TRIO	-10.282	9.11063153049385e-30
LOC122454399	-10.281	6.1455778001065e-25
PLXNB1	-10.2781	4.31226024782586e-21
RNF123	-10.2758	1.18542474396616e-67
CD6	-10.2741	1.36094331368204e-70
ORAI1	-10.2707	1.16522704081451e-67
ARG1	-10.2688	3.37793410575202e-15
CDK2AP2	-10.2665	2.12508645975809e-98
LOC122427221	-10.2648	1.08630849048444e-20
TADA2B	-10.2645	1.42686554583272e-47
LOC122421171	-10.26	3.6337117318485e-77
TTYH2	-10.2515	6.76116218429461e-21
RNF216	-10.2398	8.72695779154341e-70
FLNB	-10.2308	1.78835948796714e-123
RNF122	-10.2295	1.57075058227189e-71
LOC122421663	-10.2232	4.89681400018182e-42
SLC4A1	-10.2211	1.05285030821272e-41
TTC37	-10.2201	1.19323919048956e-23
OXSR1	-10.2062	8.72320517198495e-72
LOC122421112	-10.1981	3.70347275268833e-136
ARID3B	-10.1937	2.12505072164583e-77
SH3BGRL	-10.185	5.97096516202612e-33
ZCCHC2	-10.1831	3.29241923140924e-33
PCOLCE	-10.1797	1.02836849654965e-70
CCT8	-10.1698	4.70354105867416e-95
ZNF142	-10.1563	4.96475469813457e-45
TFAM	-10.145	5.31685012907593e-19
TASOR	-10.1441	4.07947456847419e-32
SP110	-10.1435	8.07860305857831e-92
CADM4	-10.1425	1.58402711267643e-27
CTSD	-10.1399	1.79065561771103e-164
BRMS1	-10.1386	7.87797851292e-53
NOC3L	-10.1227	3.83508974669138e-22
DICER1	-10.1209	4.28630501469714e-49
NRIP1	-10.1206	5.20731104655033e-26
ST3GAL3	-10.1199	5.0570872540625e-61
AHNAK	-10.1168	3.63386925419468e-297
GOLGA5	-10.1164	1.277047259025e-45
TMEM135	-10.1035	2.11565883959245e-21
PRMT5	-10.0876	1.25022538451806e-73
ARL8B	-10.0792	1.36612283936578e-47
LOC122426643	-10.0775	3.70651835499531e-46
OTUD4	-10.0774	5.23563532082541e-20
SELL	-10.0644	NA
THEMIS2	-10.062	1.72172501292049e-147
MAP1LC3B	-10.0578	2.42604093389942e-81
RPIA	-10.0558	1.771235862777e-38
LMF1	-10.0523	1.23539837140791e-21
TBC1D4	-10.0519	2.54344329284815e-39
FAN1	-10.0515	6.18878143396127e-27
LOC122435400	-10.0464	6.32816420573042e-26
CPPED1	-10.0324	1.45832004582708e-26
EIF4G3	-10.0316	1.48737074282935e-97
NELFA	-10.0292	2.33019674336254e-71
ATP5IF1	-10.0273	7.86133514393241e-18
ARPC4	-10.0239	3.18102998329206e-251
SOX6	-10.0204	4.80808850640405e-16
ITPRID2	-10.0203	4.83698439926667e-22
ERCC3	-10.0199	1.11715057622994e-66
TBC1D2B	-10.0195	1.62975127662443e-79
CLEC12A	-10.0145	3.35199389060732e-40
SF3A1	-10.0106	2.21358088317982e-118
MAN1A1	-10.0061	2.91746824350795e-22
RETREG3	-10.0027	1.68301579127313e-202
TMEM79	-10.0025	2.1674492069496e-21
KDM6A	-9.99956	3.10109895198187e-48
ITM2C	-9.99927	2.55861266791133e-283
WDR82	-9.99777	1.31746175475972e-147
SCAF4	-9.99764	5.17152192215653e-86
TSFM	-9.9947	5.37216813032819e-26
SOCS1	-9.99295	2.87862487253075e-18
GFOD1	-9.99122	9.00156079361776e-45
GPATCH3	-9.98676	1.01936201290432e-30
MAGT1	-9.98674	1.20543007753635e-32
PPP1CA	-9.97414	2.87664904950963e-159
CNOT3	-9.97305	4.23581208810511e-83
SUN2	-9.96988	2.9204834928904e-136
TRMT10C	-9.96829	2.10824881372477e-21
DRAP1	-9.96052	2.32481297148142e-41
PPP4R3A	-9.9583	1.34941870379242e-91
PLPP5	-9.95823	2.61741499411352e-26
EIF3B	-9.95767	5.00583420371852e-118
VAV1	-9.95446	2.46532514858502e-165
NUDT9	-9.94726	2.78077914571409e-35
TRAK2	-9.94125	1.04126287072525e-62
PDLIM2	-9.9273	1.51138706352315e-66
CHCHD4	-9.92501	6.73025835668802e-26
TMEM229B	-9.92399	4.42794542841602e-53
ETFA	-9.92079	2.00850314575489e-27
VXN	-9.91799	1.76807434608796e-24
SETD2	-9.91241	2.84340614129418e-108
FAM193A	-9.90107	2.76554356338411e-71
NDUFS4	-9.89511	1.15675757583494e-20
MFAP1	-9.87982	1.95189961397034e-100
SUGP2	-9.8794	1.41794112523023e-116
XPO7	-9.87931	4.25754327346115e-84
CCNF	-9.87475	1.78343778878935e-20
NAP1L4	-9.86949	5.34557694596218e-90
NR2F6	-9.86831	1.15696066752644e-19
PARP11	-9.86583	6.46317903991133e-25
LOC122423947	-9.85526	1.61265392991192e-90
RGS19	-9.85457	6.21197996516637e-126
PPARD	-9.85337	2.87757923236871e-83
NGLY1	-9.84531	6.00249446280326e-61
SLC41A2	-9.84367	8.9756022566045e-20
GYS1	-9.84118	2.63584583116334e-74
NUBP1	-9.84052	2.46286050372105e-25
BICD2	-9.83487	2.76812946055543e-96
NIPAL1	-9.83107	3.44918008672155e-21
EPB41L2	-9.82666	4.37517446175606e-43
SARS2	-9.81234	3.51395171722355e-27
CCDC61	-9.80593	1.85490017983213e-26
BRD1	-9.79385	3.64167767123279e-48
AP1G1	-9.77966	2.26065123922669e-120
SLC12A4	-9.77888	1.95524186895335e-38
EIF2AK1	-9.76657	2.88305341006665e-95
NIFK	-9.76523	3.15084123395294e-55
LOC122432525	-9.75919	1.53234031806262e-21
LOC122427515	-9.75842	3.06584402540501e-09
TTLL1	-9.75248	8.89240345060546e-25
C32H16orf72	-9.74938	1.27159978014471e-86
LOC122422040	-9.74883	9.34591669465879e-53
KIF27	-9.74652	5.43015192011364e-20
RHBDD2	-9.74299	2.05759912233679e-81
TTC27	-9.7368	2.00235904664746e-40
PABIR2	-9.72836	9.83260754789708e-38
CD69	-9.72593	5.8095854071745e-18
TRIAP1	-9.72315	6.27998729953434e-21
NOL6	-9.72304	5.69170962823903e-36
RAB21	-9.69939	2.38655757655563e-48
PI16	-9.69875	2.5753101616731e-37
AMMECR1	-9.68982	2.06264658095249e-19
TAGLN2	-9.68796	5.79296004228546e-224
NINJ1	-9.6736	1.12226448444224e-30
PRR5	-9.66868	5.84008950576821e-63
LOC122429659	-9.66783	1.1576481600413e-106
HECA	-9.66699	6.08031399797951e-164
LOC122435388	-9.66518	2.57647884070834e-125
PLEKHF2	-9.66474	4.84864750543154e-35
TADA3	-9.65679	1.55033644282738e-73
DDX23	-9.65274	4.80435447281725e-108
RNF10	-9.65144	9.83254141992747e-107
R3HDM2	-9.64317	1.2185801643726e-84
LOC122455237	-9.6329	2.80273593894122e-24
NEK7	-9.61752	7.71037211304283e-43
ATF4	-9.61499	1.21386375680459e-85
SUB1	-9.60684	2.13768640770263e-15
ARID1B	-9.59793	2.66020777362396e-59
ACHE	-9.59644	7.70229987810156e-19
AP1AR	-9.5935	2.73570550444603e-17
STRN3	-9.59034	7.30799506877518e-20
RIC8A	-9.58803	2.13271099731648e-64
PDZD11	-9.58799	3.66141130948216e-23
CACNB3	-9.58438	1.20205660651219e-21
STRIP1	-9.58297	8.67012766617242e-74
SMG5	-9.57461	1.94820854600016e-88
HAT1	-9.574	1.13645160095031e-16
PPM1G	-9.56036	3.09945877788484e-96
SYN2	-9.55531	4.98650414920372e-34
SH3GL1	-9.55212	2.50387977589015e-97
GALNT3	-9.54161	3.43665600276967e-17
TMSB4X	-9.53649	2.74746219578279e-265
CCT2	-9.53641	1.85107436544629e-98
CMTM3	-9.53299	8.72766748852052e-128
PMEPA1	-9.51451	2.37164895431797e-67
TUBB1	-9.50863	7.5278272712662e-94
MARCHF1	-9.50793	3.37271375615141e-18
EIPR1	-9.50685	2.73259947167728e-44
PLEKHA5	-9.50289	1.41242808501703e-17
LGALS1	-9.49673	6.82685284990325e-78
HUWE1	-9.49194	1.19326468539182e-204
MAP3K4	-9.4903	2.37272295985366e-68
TIA1	-9.48885	1.32497166823047e-45
TMEM59	-9.48553	1.14189323925582e-119
RBBP7	-9.47494	1.94262143028269e-104
FADS2	-9.46702	1.42456808135756e-50
OSTF1	-9.46569	3.10042525270876e-116
OGT	-9.46209	1.78653200143703e-84
NSDHL	-9.45652	2.4793455562514e-56
S100A4	-9.45624	NA
SMURF1	-9.4544	6.10395813782937e-67
ABHD16A	-9.44655	9.54584752837571e-62
TRAPPC6B	-9.44393	3.39069962034626e-16
RUNX2	-9.44256	9.06813250759629e-48
ZNF134	-9.43834	1.89037214151948e-37
PIH1D1	-9.43628	8.91623910533863e-59
SLC2A6	-9.42491	3.65469889790109e-61
TERF2	-9.42066	1.32743003671463e-88
CCDC170	-9.41581	1.11415913144614e-17
LENG1	-9.40591	3.50062611744417e-18
NAGPA	-9.40266	1.09011081132988e-37
STAP1	-9.40121	5.29579454871452e-18
BANF1	-9.39268	2.10448558689244e-128
GPD1L	-9.39239	2.64562829074337e-20
HINT3	-9.38539	3.52207332499456e-15
TRIM13	-9.37899	2.98172013574592e-22
KCNK6	-9.37646	4.27311084806912e-37
TEX2	-9.37441	5.42415463782877e-81
TMC6	-9.37221	1.05376614753099e-83
GOLM1	-9.37098	1.90735915264724e-43
HDAC1	-9.37027	2.13804011465905e-155
ZSCAN2	-9.36559	5.77111020350816e-17
LOC122420285	-9.35911	6.08623592484548e-22
OST4	-9.35059	1.13670936863537e-39
SEMA4B	-9.35027	6.46180865044812e-86
UBASH3A	-9.33608	6.08796730172955e-96
XRCC3	-9.32951	1.12600188395191e-17
PDE7A	-9.32532	5.97434063663e-55
LOC122427612	-9.32076	1.59373402910349e-67
TENM4	-9.3193	6.75625667064624e-19
PIGN	-9.31814	8.33370619056453e-20
RHBDD1	-9.3178	3.55868039797621e-22
RSRC1	-9.31639	1.56604890150224e-20
PPP1R15A	-9.30805	3.66323627491947e-67
RHOBTB2	-9.29309	7.17868047408153e-22
DLG3	-9.27436	1.17469938901163e-22
DDX28	-9.25948	2.05284937701139e-25
PPA1	-9.25809	2.53988821980514e-36
CCDC51	-9.25611	2.85138943950346e-24
TARS1	-9.25152	2.11348848622617e-110
RNPEPL1	-9.24959	7.25613616995125e-145
LOC122435061	-9.23407	6.20105948746111e-31
LOC122430769	-9.22761	2.27836511276545e-16
KHDRBS1	-9.2248	2.87354158722936e-176
CACNB4	-9.22416	1.36450470179988e-14
ENPP4	-9.22083	5.4678844849238e-19
SHISA5	-9.21044	1.985581553919e-137
VGLL1	-9.20869	7.06414672247085e-17
ATXN1	-9.20428	1.11504355336253e-68
OTULINL	-9.19758	2.54318292538086e-38
SLC12A9	-9.19314	1.86918763668582e-78
MFF	-9.18639	8.31410676379216e-45
SDE2	-9.18554	4.9100089935638e-95
THAP3	-9.18102	4.21254495361442e-22
RIF1	-9.18089	1.99992340596819e-23
OVCA2	-9.18051	1.05606292194912e-46
SLC33A1	-9.17986	5.61464844942623e-19
LOC122423465	-9.17906	1.12847897846919e-13
RMDN1	-9.17037	4.70352724191298e-19
KIF15	-9.15707	5.83235984805329e-18
FAAP24	-9.12165	6.05496295609402e-19
KDM5A	-9.11975	9.83455137953775e-126
LOC122420990	-9.11835	3.09496250032331e-21
ZDHHC17	-9.11657	4.07269191076086e-18
TFPT	-9.09536	4.37191741568331e-47
FGD3	-9.09275	3.92689223506591e-148
PTGS1	-9.08839	3.2621442573515e-45
LOC122421547	-9.08091	3.54991533757713e-28
OGFOD3	-9.07718	1.76312149727117e-33
NOL10	-9.07476	7.60570372067209e-62
SRPRA	-9.07123	7.4883732485302e-182
ZNF428	-9.05784	3.59947794740549e-20
FYCO1	-9.05715	1.6261101809068e-120
UPF3B	-9.05702	7.48627154586561e-48
C23H18orf25	-9.05529	3.03891748539324e-54
TMEM164	-9.04969	2.75841446911264e-212
MAZ	-9.04158	7.21412890768844e-145
TRMT61A	-9.03817	3.6614516393385e-23
ORAI2	-9.01806	1.58327628287696e-46
NECAB3	-9.01515	1.13942355546231e-13
PSMB9	-9.01473	2.83798964875995e-107
LOC122427927	-9.01318	1.2180777022743e-52
SLC27A2	-9.00241	1.77346568308842e-16
LOC122420253	-9.00039	7.90044229841828e-17
KDM8	-9.00023	7.90718185841083e-18
RAD9A	-8.99971	3.21661500848365e-46
ZDHHC5	-8.99741	3.76015907740399e-129
TAFAZZIN	-8.99741	3.20055168305125e-38
HNRNPUL1	-8.99731	2.05522667833695e-216
NRM	-8.99135	2.91955004818763e-36
LOC122420609	-8.98444	4.32190210034467e-16
ISG20	-8.98231	5.80738218809111e-126
QSOX1	-8.98185	3.30699656008371e-89
BICRAL	-8.98156	1.7618038091342e-84
C29H11orf24	-8.97983	1.15928781205509e-21
NHSL2	-8.979	9.32447458651313e-65
LCP2	-8.9788	NA
PLEKHJ1	-8.97832	1.50054318146071e-70
KIF13A	-8.97677	3.13453562907171e-21
GOLPH3	-8.97563	6.04235200167323e-70
OTOG	-8.9736	2.95899151325658e-15
TMEM204	-8.96854	1.12385203180465e-60
TXLNA	-8.96221	4.43595523925036e-87
SGSM3	-8.95755	4.91400764009957e-31
C30H9orf64	-8.95595	3.03275853030426e-46
WDR19	-8.9556	1.07586929503988e-19
DTX3	-8.95398	9.19724163651925e-37
ZSCAN29	-8.95323	2.23646470318153e-47
EEF1AKMT3	-8.94634	3.13868953847147e-34
NUTF2	-8.94531	4.2987698471364e-70
TRMT44	-8.94418	4.17428314187117e-35
ARMC5	-8.94354	1.23651290096284e-41
HNRNPA1	-8.93246	8.10913909290261e-203
ARL1	-8.92627	1.10200247021129e-29
PAN2	-8.92178	1.36244135943371e-109
TBC1D24	-8.9157	1.24957173627552e-15
RBPMS2	-8.91245	2.05931165438857e-16
IRF8	-8.90365	3.29979826088664e-114
LOC122435113	-8.89987	2.04137998747334e-20
CREBZF	-8.89621	4.82088794772327e-25
GPAT4	-8.89365	5.28046320347699e-87
SMIM19	-8.89318	9.44812155535521e-57
SYT11	-8.89049	1.03321299402108e-69
FMNL2	-8.88985	1.18277504899197e-14
STT3A	-8.88802	1.19634929121432e-108
LOC122434496	-8.88626	1.48426531035058e-13
ANKZF1	-8.88027	1.89502998272771e-68
RNASE6	-8.87606	1.65109884484874e-33
BRWD3	-8.87063	3.07952382783839e-28
USP21	-8.86289	5.67851314283687e-43
MRPL23	-8.85901	2.49955707535454e-19
LOC122421723	-8.85852	1.33731505027666e-22
SELENOK	-8.85652	6.97901612772404e-15
BAZ1B	-8.83315	6.08470292294118e-192
CCDC86	-8.82875	6.93532778828271e-59
LOC122430514	-8.82342	3.51386978478838e-21
PPP2R2A	-8.81398	8.00933709771847e-133
SEC11C	-8.81212	5.55413994384749e-21
BCLAF1	-8.80241	6.51225197468421e-141
RSRP1	-8.7997	1.25105513974098e-42
ROCK1	-8.79582	4.71030730907301e-117
SLC25A5	-8.79344	3.46695457368587e-65
DYRK1B	-8.79285	1.97312736653169e-49
TMC8	-8.79198	1.47077648834943e-137
SPEG	-8.7875	8.17729041773883e-40
KCTD9	-8.7861	7.97631763380726e-21
CPSF4	-8.7839	3.71272363096564e-55
NOP58	-8.7838	1.61016147530217e-73
CHKB	-8.78157	1.87028725813806e-112
LOC122421177	-8.77679	1.23366338305208e-50
MRPL18	-8.77282	1.38798785499192e-34
ZBTB2	-8.76595	1.72203951318166e-45
LOC122420130	-8.75698	1.26888042406454e-55
STX11	-8.75696	6.68356758133723e-83
PRDM15	-8.75519	1.93046731608074e-21
GAPT	-8.74692	2.28153616402919e-114
NFE2L3	-8.73516	1.21585505011242e-33
LOC122421157	-8.73442	1.78871325358499e-24
CBFA2T3	-8.72901	1.82286824071037e-20
KIF4A	-8.72827	1.06042872950185e-18
LONRF1	-8.72558	2.51717845671733e-18
CDC25A	-8.72399	7.95495277003367e-17
LRRFIP2	-8.69568	9.82104494884457e-64
MTHFD1L	-8.69534	1.93080549237129e-59
CEP162	-8.69471	3.59923289157752e-16
WDFY1	-8.69421	2.62614538249781e-83
SIGLEC5	-8.67942	7.25060198864571e-189
ST3GAL4	-8.67433	3.38070786697394e-72
RTN2	-8.67413	1.58521343371636e-68
TRIM32	-8.67371	5.38956274646536e-40
TMEM115	-8.67195	3.74755039857097e-79
TTC19	-8.66792	3.34577787534175e-46
AHI1	-8.6542	8.51822235619914e-41
PHLPP1	-8.65379	3.45046606001633e-20
HAGH	-8.64931	5.93133301411546e-53
PSEN1	-8.64845	3.26561854184338e-193
SLC37A1	-8.64804	4.41278185532795e-95
RAB32	-8.63981	3.16585041323898e-28
ZFP57	-8.63817	6.1426245720174e-16
TMEM234	-8.63702	4.62405579527756e-17
MACROD1	-8.63399	1.11762706191952e-14
ETV6	-8.63393	7.17501159449679e-153
TSKU	-8.63139	1.43860952457523e-18
TCN2	-8.62637	4.13046329103679e-70
SLC25A14	-8.62228	1.50580598227749e-14
DEAF1	-8.61696	1.00397348759557e-84
COPS6	-8.61221	2.37660615745596e-55
PPP1R13B	-8.61192	2.31579144656333e-74
LOC122432995	-8.61074	5.17597471573713e-19
TMEM248	-8.60698	1.26701419386548e-118
RC3H1	-8.60276	7.79621974411457e-55
SNAP47	-8.59885	9.05988366292773e-72
SAP130	-8.59659	8.8256132046128e-111
PLEKHM3	-8.59406	3.81835485601941e-60
RANBP1	-8.59088	2.86894238467341e-89
TNIK	-8.58217	1.75239392548617e-111
SARS1	-8.57907	2.62717939704615e-183
NPDC1	-8.57889	4.8204241625139e-39
NBEAL2	-8.56921	8.68878546482078e-194
LOC122420643	-8.56725	3.10911995133296e-16
DONSON	-8.5654	4.7928395802575e-17
MBD1	-8.56225	7.89773489862426e-109
PPIP5K1	-8.56113	1.96325089637015e-42
GOPC	-8.55325	5.15444589728303e-23
ZNF771	-8.54889	1.04503179543607e-15
DUSP7	-8.54782	5.36395609948144e-156
GLG1	-8.54153	3.71267486594767e-138
SLC16A14	-8.52323	1.51913202251252e-15
CABYR	-8.51703	3.11355804856515e-31
PMM2	-8.51241	2.38516673222402e-76
RBM48	-8.50833	3.21751371588946e-30
C28H6orf132	-8.50704	5.7969075723399e-30
ZNF329	-8.48501	6.55765021513713e-30
SUPT16H	-8.48464	8.2454227639194e-95
DDAH2	-8.48322	4.1590900433273e-22
AK2	-8.47611	3.4295150344883e-82
LAIR1	-8.47591	2.37602624519176e-50
DMAC2	-8.47289	1.62018820939506e-68
PPP2R5A	-8.4725	1.44231894777587e-110
ZFAND3	-8.46824	3.78060018996638e-157
RNGTT	-8.46177	7.80055524274635e-50
STX4	-8.45776	2.94480627344506e-45
ADGRG5	-8.45766	5.04600387722534e-64
USP1	-8.45664	2.4483360752625e-15
WDR25	-8.45521	6.24633742865867e-20
LOC122424805	-8.45349	7.07852006559475e-51
ISY1	-8.44772	3.52555340980333e-76
RDH10	-8.44722	4.13078696191741e-15
CCNE1	-8.44322	1.01995815251495e-14
ING4	-8.44278	1.6603900126862e-125
PSMA4	-8.44256	1.30933797161854e-36
GSPT2	-8.44043	2.93278801292042e-51
LOC122428908	-8.43923	2.70191157045015e-16
LOC122433255	-8.43125	2.96343286113483e-41
CFAP20	-8.43006	2.2351470430188e-54
SRP54	-8.4287	5.4514841045331e-83
PLCG1	-8.42431	4.27938002334985e-160
PROCA1	-8.40534	4.88900270853281e-18
EPG5	-8.40314	1.30865712175805e-78
CREBL2	-8.39402	6.91994670488776e-49
PPP2R1A	-8.39393	5.63946859954546e-116
FRMD8	-8.3931	4.21892966717977e-81
TBCK	-8.37773	5.32224685913733e-36
GRAMD1A	-8.37246	1.26747287879377e-77
GINS3	-8.36126	3.76385474756503e-18
TMEM87B	-8.36034	6.11804214318173e-39
SRSF3	-8.35803	2.39083504497378e-54
CDH13	-8.35061	6.57682471648089e-08
FAM98C	-8.34213	1.74885064785004e-18
EIF3D	-8.34129	7.70940564254167e-196
METTL8	-8.33801	1.48186986581244e-16
NUDT21	-8.33473	2.38212548916248e-75
NRDE2	-8.32497	3.31245595990116e-76
NXPE3	-8.32189	1.27929028124813e-38
LOC122433328	-8.31892	5.34344010976437e-101
PLA2G6	-8.31774	2.00614825762995e-45
ATP6V0D1	-8.31768	1.30108502835791e-142
C7	-8.3023	1.17886849935628e-61
HNRNPK	-8.29874	NA
LOC122424582	-8.29515	2.08516530629477e-44
LOC122435198	-8.29438	8.02039234784424e-18
LOC122426096	-8.29397	1.5648071802282e-13
SEC61A1	-8.29075	5.5381566685397e-137
TLE2	-8.28746	1.84255099158725e-17
B4GALT1	-8.28722	5.83720679749936e-255
LOC122424040	-8.28611	8.30097145060091e-68
TRIP4	-8.28564	5.46883774951002e-97
MED17	-8.2827	2.75333080555463e-53
TMEM120A	-8.28076	1.60334990883157e-63
R3HCC1	-8.27969	1.25533715541143e-62
LOC122424055	-8.27878	2.8542963636973e-16
TMEM231	-8.27792	6.65002764200732e-16
LCORL	-8.27215	4.18348638385404e-13
MOCS2	-8.25653	3.09672847183089e-14
SH3TC1	-8.25028	3.28802530532887e-44
DDR1	-8.24846	6.23864754393991e-13
LOC122423128	-8.24462	1.17725661534938e-42
LOC122421048	-8.24437	4.88639702386143e-14
OCIAD1	-8.24397	1.0098267803128e-95
LOC122455089	-8.24082	1.55458587917511e-12
SCP2	-8.2369	1.43739338272193e-66
GALT	-8.23142	2.13369925256116e-18
RPP25	-8.2312	1.42378867406735e-14
GPRASP1	-8.22956	1.23349615722241e-27
PNPLA8	-8.22833	4.9430580545644e-30
LOC122424056	-8.2275	2.88641285858273e-10
LOC122427196	-8.22173	1.96888852176774e-152
TBPL1	-8.21727	2.63396095902264e-35
FUNDC2	-8.21451	6.69636031486035e-78
ZMYND8	-8.20704	1.67634695728227e-108
ATP2B1	-8.20395	3.85413295359135e-10
TTI2	-8.20275	1.34619217162049e-55
ETNK1	-8.19825	2.21257239909097e-31
RITA1	-8.19667	2.88163044431191e-23
LOC122424037	-8.19387	1.29348136684065e-11
SNTB2	-8.18874	4.68778671488876e-17
MEGF8	-8.18376	1.2145694553262e-34
LOC122453943	-8.17025	5.4271780964247e-23
FERMT3	-8.16411	5.52830916645549e-103
PFKFB3	-8.16124	9.47246220857491e-57
ERGIC2	-8.15902	5.31609513069947e-24
MAP2	-8.15702	2.63396095902264e-35
ISCA1	-8.15658	1.54833372314139e-67
RP9	-8.14535	1.0519415678161e-26
FOXRED1	-8.14483	1.48887393019667e-67
ARSA	-8.14164	1.82630547007368e-55
HDDC2	-8.14104	2.04128978797994e-13
ATP5PF	-8.13651	7.98179988158817e-75
PYGM	-8.13593	4.66292136901716e-17
RASAL3	-8.13149	3.15833632099757e-147
THG1L	-8.13036	2.19345526562923e-51
ARPC1B	-8.1209	NA
TBC1D20	-8.11723	1.32423602838885e-96
INTS4	-8.11404	1.15151589880753e-80
C17H15orf39	-8.10999	5.37523110312219e-61
KPNA6	-8.09799	5.41634485846099e-170
INTS5	-8.09618	2.17007272084674e-55
UFSP1	-8.08821	3.59835791201922e-13
NUBPL	-8.08666	5.01013746264272e-14
NEDD8	-8.07742	1.4849603687559e-73
B4GAT1	-8.07627	2.06606191972993e-18
ECI2	-8.07162	3.10597644999521e-31
PABPC1	-8.0656	NA
CD9	-8.06534	7.86019495140559e-47
LOC122429591	-8.06526	1.09184885789246e-96
TMEM106A	-8.06188	2.81720715435181e-71
ARHGAP5	-8.06151	1.20643274065617e-12
ZFYVE1	-8.05941	4.52968329514746e-68
GNL3L	-8.05053	4.61180116885232e-114
AEBP2	-8.04929	4.65171306468953e-34
LOC122429686	-8.04467	NA
LOC122455265	-8.04214	6.04006714634587e-181
EIF5	-8.0374	1.95999074670851e-156
NABP1	-8.03654	4.81588932120574e-35
LOC122430140	-8.03509	7.4487596569153e-46
PLEKHM1	-8.03404	2.85546590046524e-176
ZNF592	-8.02948	5.16701967395415e-89
MEF2A	-8.02417	4.38180891612066e-33
KDM2A	-8.01438	1.51341214815515e-226
TRIM38	-8.01256	4.41774192744078e-95
CCDC85B	-8.01162	5.54108628960664e-21
PPP1R3E	-8.01032	2.92763628982338e-38
TIGD5	-8.00638	6.37256735164371e-31
NEK4	-8.00345	5.69334817376427e-16
PSMD6	-8.00319	3.02733035504743e-47
TRIM45	-8.00259	1.42252935919768e-12
TCN1	-8.00101	8.86754030658886e-21
PTPN13	-7.99317	1.08714190974075e-23
LOC122454429	-7.98445	1.5066313543686e-12
PCYOX1	-7.97969	3.91375084182683e-78
XCR1	-7.96588	1.3764015295171e-44
LOC122421209	-7.96288	4.67972430244942e-14
UBE2S	-7.96141	3.38844851010431e-79
TNFRSF11A	-7.95936	2.05580049749803e-14
SWI5	-7.95774	1.04935379406385e-15
PARM1	-7.93513	6.93890141481844e-62
CARD11	-7.92974	1.11657269996148e-109
FOXO4	-7.92825	6.18328502692712e-71
CCDC85C	-7.92794	1.86104487865669e-13
TMEM43	-7.92696	8.85446804495854e-139
TYK2	-7.92602	1.62660924618265e-193
LOC122433820	-7.92063	2.52763801587149e-12
C1QA	-7.92039	6.97781993311222e-11
HMGN2	-7.91885	3.32833471300184e-31
DHX29	-7.91426	1.19185605295723e-89
DCK	-7.90991	8.5016513206384e-37
SFMBT1	-7.90352	4.05252651625075e-91
FABP3	-7.9008	2.06789070807268e-21
STRADA	-7.8979	4.49484825312622e-73
FSD1L	-7.89741	1.45307577364218e-09
USP37	-7.89592	3.84406191523774e-34
TRPM4	-7.89113	3.6650502163324e-13
SYTL2	-7.89083	3.42619311508246e-49
SLC2A4RG	-7.88846	4.89843941121423e-39
ZNF24	-7.88428	3.82224146636544e-89
NUP155	-7.88255	1.24914537806535e-51
DCTN2	-7.86958	2.10606727759554e-176
RPS4X	-7.86525	1.63736134677735e-182
LEMD3	-7.86515	6.39491809617511e-30
LOC122426673	-7.86494	1.52026449751196e-36
TRPM7	-7.86195	2.99682581131675e-29
USP49	-7.85545	1.17318299725092e-31
ZC3H7A	-7.84478	4.97700242239409e-54
ZSWIM8	-7.82738	2.19949890799161e-100
RNF144B	-7.81773	5.82156809574414e-118
KARS1	-7.81512	NA
LOC122432984	-7.80952	3.08461742480226e-46
MARS1	-7.80555	2.18499684486535e-149
TMEM141	-7.80411	1.49786478158782e-22
TACC3	-7.80186	5.48910336765089e-94
KREMEN2	-7.79982	2.99998578731951e-35
IL4I1	-7.79743	2.12450354581502e-31
LOC122420023	-7.79512	1.21530010200781e-50
STX5	-7.7944	3.56041286761833e-99
CTDSP1	-7.79439	1.26579300777129e-164
DCTD	-7.794	9.19391540178338e-15
SMAP2	-7.79242	1.84902977686792e-185
SLC30A5	-7.78535	9.13188012487645e-45
SEC22B	-7.78213	4.56829541084921e-75
SEH1L	-7.77474	6.06340241444522e-72
PRDM4	-7.77112	1.307823030506e-90
LOC122420306	-7.76942	3.52704258018672e-134
TMEM18	-7.76798	4.45719055307609e-71
ATXN3	-7.76075	1.33205888919912e-21
PSENEN	-7.75767	1.59852429018173e-199
PINX1	-7.75755	4.71812524029939e-41
RNF170	-7.75684	2.88454112197528e-60
PRDX4	-7.74958	1.85260934391397e-61
LOC122435446	-7.73986	3.90495148836948e-15
DYRK2	-7.73906	6.31324291169846e-103
BLM	-7.73704	7.06253668407119e-38
SLC46A2	-7.73427	3.75298974715579e-25
TMCC1	-7.73006	6.26523719872762e-139
LOC122421506	-7.71968	7.6641538106633e-26
SLC39A2	-7.71737	2.06453442697568e-16
ZNF740	-7.71281	4.83945102948277e-07
SORD	-7.7115	6.75624345523952e-18
TOMM40L	-7.7028	4.85159791766416e-54
LOC122425824	-7.70167	4.8318893447708e-251
DST	-7.69622	1.65973447693314e-39
EMC8	-7.69404	2.35949833099858e-59
C1R	-7.69222	8.5887381624512e-104
C18H19orf84	-7.6833	4.19260955274051e-12
LOC122436524	-7.68133	9.22674915810547e-39
SENP7	-7.68038	2.43002770898667e-27
HSD17B10	-7.67973	3.75193132811142e-73
SH3BP2	-7.6772	1.04183379268678e-126
LOC122436370	-7.67653	1.98179623739872e-44
C16H5orf22	-7.676	2.51580258046899e-21
CHST11	-7.67551	2.355975686338e-122
KLHDC3	-7.67432	7.93715808776094e-159
CARD19	-7.67239	8.7784201170554e-42
SYNJ2	-7.66724	2.80764679987507e-12
LOC122428625	-7.66712	2.08442875419255e-78
RNF8	-7.66242	1.58214050719757e-52
VSIR	-7.65987	8.57065620926553e-159
VTI1B	-7.6559	3.75679491543348e-86
LOC122454606	-7.65571	6.6131554351315e-29
TCAIM	-7.65342	4.92284579825926e-22
SLC24A4	-7.64576	2.34251392145812e-11
NFILZ	-7.64502	3.08480381102435e-13
GNPTAB	-7.64293	4.56170577011227e-70
SMPD1	-7.63677	1.73373719738407e-102
ELOVL5	-7.63628	9.92494007765348e-66
LOC122423337	-7.63525	2.05451423830366e-33
SKA1	-7.63472	1.71135223510173e-12
BACH2	-7.63439	3.48321664590998e-105
PARK7	-7.63419	7.40076384861669e-71
SLC66A2	-7.63189	2.01294573375109e-35
SEL1L3	-7.62638	2.0982844576153e-130
CDC5L	-7.62288	8.46735854637132e-213
LOC122428192	-7.62079	1.27872517887572e-12
P2RY1	-7.60839	1.53541007082841e-31
ACTB	-7.6062	5.64163961087355e-237
INO80D	-7.60356	2.22028463092858e-55
PGAM5	-7.59818	1.59811565570399e-76
PAK2	-7.59061	4.41472638228199e-119
SACM1L	-7.59027	8.56174444587468e-46
ABHD14B	-7.58711	3.54839397718278e-31
ARHGAP17	-7.58696	1.27818392388612e-92
GNPDA2	-7.58545	4.45830687532677e-14
ZNF296	-7.58124	3.96267357959268e-55
RAD23B	-7.57794	2.02573233103654e-122
CLPTM1L	-7.57077	1.26692034063295e-175
GTPBP1	-7.56897	3.79234492414526e-102
FAM120B	-7.56682	2.76535325828539e-37
SRD5A1	-7.56659	6.59522332939809e-24
ZMAT3	-7.56565	2.26629342671487e-16
RBM10	-7.5614	1.96926827121693e-156
PCLAF	-7.54612	4.03246055796469e-18
AZI2	-7.54477	1.65712431315587e-49
COG4	-7.54289	3.13558132069269e-79
PSD4	-7.54149	9.21547773553267e-175
TRUB2	-7.53787	7.84670261869249e-43
OAZ1	-7.52942	1.11423993204743e-43
SCYL2	-7.52094	3.57106480477022e-47
VAMP1	-7.51488	1.17879454083102e-58
RAB29	-7.51262	5.49394936287098e-38
CAMK2N1	-7.51257	9.41017647079793e-14
DIMT1	-7.50571	3.77153762223648e-34
LOC122434355	-7.49739	1.63919785724997e-24
CMC2	-7.49577	1.32199657335334e-47
GLYR1	-7.49159	6.80707633845086e-278
PINK1	-7.49146	1.46299505095027e-96
POT1	-7.4864	3.94115160413182e-37
EXOSC5	-7.48204	7.4063317139622e-42
PRPF4B	-7.48061	5.77369873898671e-131
HOMER2	-7.47604	1.090579732633e-33
RUSF1	-7.46499	3.78118405987971e-49
SYPL1	-7.45924	9.86607933056911e-67
SYVN1	-7.45642	1.3973971098302e-109
NTAQ1	-7.4563	4.59321899333641e-24
UGCG	-7.45032	6.15404431146455e-69
MCPH1	-7.44489	2.51476993349368e-39
UCHL1	-7.44365	6.73605912023113e-15
ALAS2	-7.44261	8.52176758674804e-15
PCGF1	-7.44242	4.11994837719314e-31
ST8SIA5	-7.44063	6.48638522832105e-14
LOC122435836	-7.43552	3.25851405360094e-72
AMT	-7.43499	2.30803880347514e-63
CCDC15	-7.43306	4.40240390219553e-32
SIN3B	-7.4319	5.80732219785836e-101
LOC122419702	-7.42881	1.40576441765966e-10
LY86	-7.42861	5.54099208871274e-17
VMAC	-7.42189	3.46387046111166e-12
LOC122421111	-7.41994	2.21991696626934e-110
ADCY9	-7.41897	1.94160613586454e-52
HS6ST1	-7.41505	2.7086321186667e-80
WDR75	-7.41218	1.06894388692847e-41
SEPTIN11	-7.41114	1.40921468343211e-124
TMOD3	-7.41025	3.55444451033807e-58
AP2A1	-7.40041	3.32841220812688e-120
CHMP1B	-7.3994	1.55039824431588e-166
RNF213	-7.39904	7.51476475388977e-167
MED21	-7.39481	3.08249929927158e-11
CD83	-7.39449	8.32066954954634e-27
TTC14	-7.39264	1.9589167644493e-24
LOC122424551	-7.39144	6.75632538344873e-46
RNMT	-7.38994	1.04547644255196e-49
ATF6B	-7.387	7.01665204582259e-114
RAPH1	-7.37347	2.14775999185089e-10
MIER3	-7.37222	2.05907701568477e-17
METTL1	-7.36699	9.21221356251318e-35
PVRIG	-7.36568	1.88466760497528e-56
LOC122433058	-7.36499	2.67778234330288e-117
SCIN	-7.36364	1.90624475915267e-11
LOC122423112	-7.36186	4.69603352466328e-56
MAP7	-7.36173	9.43229915088627e-12
SMC2	-7.36086	5.43571367888455e-63
LOC122428725	-7.35936	1.26144012836077e-12
LOC122432124	-7.34828	8.26009677815052e-34
NXPH3	-7.34245	7.37374669144226e-10
LLPH	-7.34155	6.57260407107107e-17
CNOT9	-7.33565	1.74043874554722e-133
ZNF569	-7.33279	6.61971054004309e-10
SUPT5H	-7.33216	1.53477441070009e-121
MRPS25	-7.32892	2.16180538681592e-62
RNF11	-7.32727	2.80139788771066e-32
USP35	-7.32696	2.34339619946315e-12
ADM5	-7.32547	3.35645224643398e-36
HYDIN	-7.32533	1.17385116556478e-13
PAXBP1	-7.32461	1.0781261055338e-54
ARAP2	-7.3237	8.22063937729573e-59
TMEM177	-7.32223	3.45894782170187e-12
TAMALIN	-7.32088	2.11060731840622e-13
C29H11orf68	-7.31752	1.74473811919695e-62
DEF8	-7.30929	2.45699267324596e-119
LOC122433195	-7.30779	5.03933358380994e-11
LOC122424807	-7.30518	1.05695631392501e-30
MPHOSPH10	-7.30352	2.4107785431653e-60
BFAR	-7.29403	4.34182544613762e-125
TXNDC12	-7.29251	3.98741772713688e-118
STAU1	-7.2888	1.02175416827702e-158
TMEM154	-7.28736	8.65702086755503e-166
SEPTIN6	-7.28297	1.81563386348612e-204
NSUN3	-7.28065	2.85645830514592e-11
SLC9A9	-7.27762	3.27115855662538e-51
RMC1	-7.26949	5.67375529957967e-61
LOC122431078	-7.26705	2.05398390792709e-31
CSAD	-7.26106	2.51669440214482e-34
RBSN	-7.25934	4.70582948393073e-170
PTGER2	-7.25316	4.03040295453942e-14
IFNAR1	-7.24793	1.1687456885718e-175
NLRP12	-7.24664	3.1193580722045e-110
POC1A	-7.24019	9.43967502721068e-49
PITHD1	-7.23526	5.11936099508321e-54
FBP1	-7.23433	4.17379723371662e-13
TRNAE-UUC_62	-7.23244	1.04923193225724e-10
ADSS1	-7.22979	7.45083474174886e-24
NTPCR	-7.22643	3.38523162690423e-95
LOC122429188	-7.22622	2.18609398864789e-30
DDX11	-7.21716	1.13670552290061e-18
OSTC	-7.21105	2.86163449635547e-46
ITGA4	-7.2092	6.49940453318617e-85
TLR6	-7.20344	7.13802328535665e-32
GOLGA7	-7.20214	9.23798813679284e-127
LOC122424446	-7.20152	6.41100096716398e-13
TSG101	-7.20081	5.55670628360861e-77
TP53	-7.20035	1.23939697583807e-157
PAFAH1B2	-7.19561	1.18029763750621e-163
MEX3C	-7.1938	3.80739276323541e-29
PNN	-7.18608	1.24528796168659e-145
NMNAT1	-7.18551	2.84361322874548e-12
SLC2A1	-7.18246	4.22233437132721e-91
TRAM2	-7.17888	2.92531054291229e-33
CXXC1	-7.1706	6.3237340052358e-135
LOC122423674	-7.16964	3.65766367376347e-10
WASL	-7.1681	3.94953223546821e-41
SRRT	-7.16191	1.59948007025633e-140
RHBDF2	-7.16088	2.15647719611278e-163
LOC122427821	-7.1608	2.5603078478288e-10
MRPS24	-7.15325	1.9737635493279e-64
LOC122431989	-7.15266	4.75885341610834e-19
LOC122454605	-7.15162	1.00448574998921e-165
SMIM3	-7.14844	1.2078783424667e-49
C19H4orf3	-7.14445	6.90622521818753e-64
IER3	-7.1394	1.36771896488726e-25
GINM1	-7.12895	3.38847141657244e-45
LOC122420686	-7.12808	5.30079253163763e-12
NICN1	-7.12521	2.05080007668873e-92
SLC25A37	-7.11811	1.05377861856747e-65
LOC122420302	-7.11784	1.98197270732066e-12
ATP6AP2	-7.11604	3.84174505753198e-57
AP5B1	-7.11406	6.87834274149589e-81
LYRM4	-7.11245	7.21119426008995e-36
ZFP36L2	-7.11197	1.92239068927412e-66
PCSK7	-7.10869	9.57760029525849e-140
LOC122421341	-7.10444	4.91182063310205e-25
PIR	-7.09959	1.96939690710646e-10
LOC122424562	-7.09662	1.20801056554592e-180
UTP18	-7.09656	5.00124877184629e-82
TIMM17B	-7.09259	2.73458432940592e-81
SLC18A2	-7.08327	1.25011339447264e-24
COTL1	-7.07703	1.80439500097868e-136
MAST4	-7.07626	2.3605372072137e-36
CHMP7	-7.07571	4.86914218250351e-53
FAM135A	-7.06879	2.34150097694116e-22
LOC122428806	-7.06265	9.57031777902857e-10
CDC40	-7.06097	8.13410458939121e-36
PTPN6	-7.05565	1.34754581664577e-138
PLCB3	-7.04408	7.72693358721679e-65
LOC122421399	-7.04357	1.0367998350446e-18
SBF1	-7.04168	4.7765276579584e-137
HPSE	-7.04043	3.86738742269554e-107
MOCS1	-7.03642	9.91785353255898e-31
SUSD3	-7.03502	3.33233602470702e-52
DDHD2	-7.03364	4.05682605916672e-72
AMOT	-7.02996	7.26446897812382e-21
WDR91	-7.02775	2.3498081649873e-77
MEAK7	-7.02031	1.71398357870965e-52
KIRREL3	-7.01362	1.68027073185398e-10
LOC122433032	-7.01025	1.83443798320577e-77
BTG1	-7.00553	NA
SMAD5	-7.00493	3.98690476452757e-21
FAM219A	-7.0028	1.30593995985777e-54
SHD	-7.00276	1.20308281894183e-20
GPR146	-6.99819	6.84150717128943e-12
CISD2	-6.99776	2.02696655842984e-09
HBS1L	-6.99725	3.84615946423204e-56
RNF185	-6.99571	3.53941248699433e-117
PBXIP1	-6.99352	1.04422183179367e-140
TMEM38B	-6.99091	6.1339261728336e-09
SSB	-6.97999	2.14371152932769e-57
LOC122435012	-6.97972	1.70496060410487e-11
DIS3L2	-6.96975	1.46186745043778e-62
CSTF2	-6.9652	2.96397537292503e-109
RNASE4	-6.95931	3.2680639253746e-24
RNF214	-6.95689	1.32604426800778e-41
UBE2K	-6.95624	1.01213683354585e-122
GTSE1	-6.95057	8.17294523674313e-34
PCMT1	-6.94912	1.9648502253408e-105
FCHO2	-6.93701	1.02181143455909e-21
TSC22D1	-6.93237	8.1266864055903e-111
NSMCE3	-6.92744	4.92458434230462e-43
LOC122420930	-6.92639	2.38198984606707e-16
RFTN1	-6.91849	1.1517595165739e-85
LOC122420045	-6.91802	9.14210433779834e-31
PEA15	-6.91373	9.37362676159088e-158
MLKL	-6.91312	1.01059673806041e-92
GPR62	-6.90737	2.22239455650415e-12
APLP2	-6.90495	7.14591417289791e-57
VDAC2	-6.89848	7.10073960178796e-192
HPS5	-6.89516	6.19043232652129e-145
RHOT1	-6.89407	2.34379694817262e-31
SHKBP1	-6.88334	1.19118327444116e-132
PRR12	-6.87468	1.61926599704352e-120
P4HA1	-6.87134	2.69363020600133e-50
PRKAB1	-6.8694	7.89003728485792e-100
NEDD1	-6.86892	3.83094422527866e-38
CBFB	-6.86808	1.64230375429018e-42
LOC122424387	-6.8679	8.5911333658845e-28
UPP1	-6.86766	5.2931596847322e-80
NEK1	-6.86593	9.14101873893438e-15
LOC122426713	-6.8636	3.49651344732009e-25
ZNF395	-6.8596	5.19891553042733e-98
KDM1B	-6.8569	4.5847029925563e-72
TIAM2	-6.84457	7.85686365151107e-24
SLC35A5	-6.83854	4.98266307899918e-62
PRKCD	-6.83812	8.78701863388148e-166
LOC122433188	-6.83727	2.23109543671243e-128
PEX6	-6.83493	3.19224758423829e-64
IMPA2	-6.83467	1.51982961526243e-98
S100A5	-6.83106	5.59733550907508e-14
ZNF12	-6.83069	2.71863792274953e-40
LOC122426882	-6.81904	2.22375293149558e-12
EHBP1L1	-6.81228	4.57324561254143e-119
USHBP1	-6.81224	1.71672681659027e-43
UEVLD	-6.81206	2.33260129977252e-19
CSRP2	-6.8056	9.61174152490771e-13
XNDC1N	-6.80522	1.22302112678424e-43
TUBB4A	-6.80465	3.29577816682705e-44
PKDCC	-6.80421	2.14206909231901e-12
LOC122420213	-6.79738	1.9900931923621e-07
CSRNP1	-6.79428	2.81407135672773e-109
RFLNB	-6.79342	7.77824495548622e-138
IMP4	-6.79201	3.14652561548924e-109
NCR1	-6.78754	8.07520476851245e-19
FIP1L1	-6.78564	6.41402779228376e-115
BAZ2A	-6.7825	1.90771032825096e-256
NKD2	-6.78241	5.6568635353096e-25
GPATCH1	-6.77523	8.76127620307063e-83
EXOG	-6.77153	5.62097825411255e-30
SLC37A3	-6.76557	5.45869476618299e-83
PIK3C2A	-6.76411	3.58344841950182e-16
POP5	-6.76289	8.47788232581608e-44
PRKAB2	-6.76112	3.6944194899873e-14
PKN1	-6.75658	5.70605853978543e-155
CRY1	-6.75281	1.0070445791937e-32
RPH3AL	-6.74699	8.85493716835133e-41
ZNF311	-6.73822	2.58830537508125e-09
LOC122429635	-6.73424	3.8622200359475e-98
LCMT1	-6.73172	9.03247975824436e-51
STX6	-6.72571	4.53300666291733e-268
ZNF331	-6.72564	1.39743228872477e-49
LOC122428190	-6.72307	4.05818369745892e-06
RNF5	-6.72154	4.75021219415042e-72
LOC122421435	-6.72107	2.48180823893646e-41
SPINDOC	-6.71272	3.77519966674714e-50
TDRD1	-6.71146	7.67354491913162e-19
PLK3	-6.70467	1.62115507486447e-40
PKLR	-6.7044	1.00558186198245e-22
CCAR2	-6.70217	5.98333302570157e-155
LOC122429726	-6.69965	1.05686503529092e-156
RMDN2	-6.69571	3.85031051672695e-20
IL7R	-6.69282	6.28483406702102e-122
LOC122423220	-6.69108	2.73301470374506e-47
FBXO42	-6.68783	4.50246027437901e-124
KCNK5	-6.68071	2.58156272871079e-36
SLC10A3	-6.67964	3.63543958481242e-75
POLG	-6.67643	9.88577703873679e-126
WRAP53	-6.67494	1.9067188032149e-51
SCAMP3	-6.67335	2.08284241054528e-80
IPCEF1	-6.67335	2.75367259552756e-120
CCDC96	-6.6716	2.62661792566795e-11
LOC122433311	-6.66173	1.82448092509505e-07
SYDE1	-6.65733	3.17147250011332e-44
SRP19	-6.65579	1.72158325110076e-47
LOC122435830	-6.65267	1.1250713743562e-09
CCZ1	-6.6516	1.2832074646823e-79
BBS2	-6.65033	2.82423537721042e-61
LOC122420931	-6.64891	8.65187853273374e-10
ADNP2	-6.64792	5.48731964416446e-118
PTGDR2	-6.64518	3.52203252985573e-75
WDR77	-6.64252	3.78009759880171e-79
LRP3	-6.64152	4.56146166689183e-12
FAM126B	-6.63911	1.10681088061936e-20
FANCI	-6.63793	4.12754243932848e-41
SPAG5	-6.63617	1.84515679492411e-36
CLUAP1	-6.63554	3.43100236982257e-56
TNFAIP2	-6.63203	1.21918378854357e-54
UAP1L1	-6.63081	8.75546728726105e-69
ZC3H12A	-6.63006	4.67487212834142e-95
ZNF213	-6.62838	1.17444546854367e-11
RALBP1	-6.61318	4.22109466444762e-132
CEP290	-6.61276	1.13023858057046e-17
EMB	-6.6099	2.41229089307507e-53
PPP1R12A	-6.60581	2.0802960007716e-55
PRSS2	-6.60574	4.23614744922337e-10
SHC1	-6.60194	6.06617969129886e-244
DOP1A	-6.60088	5.88821048628408e-47
GLO1	-6.58116	8.93240170519095e-70
ZKSCAN7	-6.57553	7.69379494071426e-31
CDK4	-6.57535	8.68394520978846e-95
TMEM25	-6.57393	2.56288639507114e-23
LOC122419633	-6.56987	1.42492151985509e-10
RTP4	-6.5689	5.92145670851174e-09
POLR3D	-6.56525	5.11716206325535e-65
LARS2	-6.55882	1.29211937915666e-36
LOC122435973	-6.55095	1.46442955646182e-08
SUDS3	-6.54729	5.19417774960763e-78
USP45	-6.5441	6.18069597788596e-08
TMOD4	-6.54271	5.04372024478806e-46
ACVR2B	-6.53986	4.15976936406482e-55
CENPM	-6.53976	2.58990058997826e-55
MYB	-6.53973	1.5218668232577e-18
LOC122435161	-6.53913	4.87537190586651e-09
ADGRG6	-6.53137	1.9687285682789e-15
POP4	-6.52378	1.23877187084244e-74
ATMIN	-6.52228	4.82965367937734e-116
PCP4L1	-6.52075	1.4350449239605e-23
LOC122429972	-6.52011	4.49506720560799e-81
TTC26	-6.51687	9.1403494806463e-09
IARS1	-6.51659	1.27549893502435e-118
ZFP1	-6.51648	2.41140993301364e-10
YARS2	-6.51503	9.61550460639278e-17
LOC122423495	-6.5145	5.00407677201696e-16
RPS19BP1	-6.51318	6.3171652342338e-109
SLC16A1	-6.51239	5.22439363274038e-56
PIK3R5	-6.51207	2.12202234631523e-192
RHAG	-6.50946	3.45979750036443e-14
LOC122455144	-6.50657	3.18803407604232e-118
CIAO3	-6.5046	1.88882839226782e-78
HIGD1A	-6.50102	2.13276186269949e-11
PCIF1	-6.49242	1.37471972872715e-68
LOC122431043	-6.49001	2.15427277829251e-95
GPI	-6.48607	1.26404525974761e-95
DDX17	-6.48572	6.7617474744193e-103
FTH1	-6.48491	7.19389040654965e-68
RPL26	-6.48423	1.70434538532127e-153
KCNC2	-6.48363	1.79345534325049e-07
BAG1	-6.47998	8.21948680667338e-59
WDR24	-6.47924	7.45785662123101e-80
LOC122424353	-6.47732	2.63586976475887e-38
RIMS1	-6.47412	1.89220927236032e-08
TCP1	-6.47001	2.39631605884852e-156
VHL	-6.46893	1.95652142133842e-27
FLT3LG	-6.46821	2.42360921245156e-72
LOC122430083	-6.4682	5.33345607871284e-08
PRKCB	-6.46802	2.48458547252185e-225
MLF2	-6.46585	7.98700380246241e-111
LOC122424641	-6.46121	1.3792452878559e-25
PLEKHA4	-6.46088	1.9109597559999e-17
MST1	-6.45917	3.14363655372588e-08
EZR	-6.45532	2.24700050377149e-137
GAR1	-6.45406	1.13539105920646e-40
LOC122432873	-6.44996	1.22755130437861e-17
S1PR1	-6.44306	4.53748177338335e-141
LOC122453685	-6.44099	9.65252524158227e-12
GPR155	-6.43365	3.23881055865363e-29
PXN	-6.43182	8.18926209522329e-186
MXD4	-6.43105	3.88880383901686e-110
PYCR2	-6.43036	1.56452439151391e-63
SERBP1	-6.4294	2.7669578600115e-181
ZNF200	-6.4252	2.11632383877561e-32
LOC122453828	-6.42469	1.72035242182714e-17
VMP1	-6.42231	1.52831945585821e-35
MRPL1	-6.4193	2.88487101601619e-09
SELPLG	-6.41846	1.65893854442609e-123
NFKB2	-6.41694	3.20701224335943e-86
WIZ	-6.41623	2.38511786695357e-74
LOC122431363	-6.41359	1.3630408637217e-12
RCE1	-6.41286	4.94786148559439e-66
TNNI2	-6.41123	8.7209727201828e-16
PIGBOS1	-6.41059	1.16864864554791e-18
TMEM92	-6.41023	4.23957466039929e-09
RPS2	-6.40757	5.61489122034079e-217
ENTPD4	-6.40565	1.16692265760505e-112
SLC16A6	-6.40498	7.00477275705012e-66
TNFRSF25	-6.39887	2.40284770900913e-42
WDR53	-6.3939	2.27976081245557e-21
HCST	-6.39215	4.98315786403326e-93
TNFRSF1B	-6.38594	5.38169746563945e-106
PSMB1	-6.37269	3.52908986784334e-96
LOC122434824	-6.3694	1.67317413851473e-10
IMPDH2	-6.36885	3.05805972367772e-121
LOC122424974	-6.36812	3.35956493196719e-08
LOC122420604	-6.36665	3.9085062909902e-20
TMA16	-6.36581	1.7232793033255e-28
TMEM170A	-6.35622	1.13597665914764e-63
ARF4	-6.3556	8.00944920421893e-139
NUBP2	-6.34844	6.91641330266476e-59
SV2A	-6.34577	2.05382844920334e-37
PLEKHO2	-6.3456	8.63813043992886e-148
TAB1	-6.34381	1.43665579523038e-81
SH3BP5	-6.33944	1.5162894497125e-48
SOX18	-6.33585	1.35375809591971e-09
TRAP1	-6.33558	3.07265004932777e-91
RCN2	-6.33521	8.5975501693215e-27
AXIN1	-6.33297	1.06723312610648e-78
AEN	-6.33097	5.39712461336473e-49
MPG	-6.32441	1.2817269659302e-83
LOC122435071	-6.31385	1.65196091035782e-07
ZFYVE28	-6.30957	8.63696853210645e-10
QSER1	-6.30718	1.25099573695747e-31
TIGIT	-6.30693	2.19667294766872e-09
LOC122432738	-6.3063	1.42495799792469e-26
LOC122428753	-6.29991	7.96811501774998e-35
PATL1	-6.29627	1.09547042602879e-175
POLR2G	-6.29615	1.27849173793442e-131
C28H6orf47	-6.29298	9.92482149866699e-109
PFDN1	-6.28404	7.92819129531767e-27
LOC122435630	-6.28158	9.22566933250052e-79
NABP2	-6.27854	4.03817911296096e-110
SP1	-6.27812	6.20713894081114e-261
IMPACT	-6.27656	5.03984791529286e-17
RAB39B	-6.27547	2.44447465855218e-20
WNK2	-6.27347	2.27625454319381e-09
LRRC1	-6.27266	2.68319370203091e-08
FLI1	-6.27213	NA
TRMT10A	-6.26939	2.16253118030918e-10
SAMSN1	-6.26837	1.62487339457128e-69
STOX2	-6.26162	5.76849136086287e-06
TP53INP1	-6.26101	2.51566510679014e-66
RELT	-6.25857	1.06066593868111e-59
LOC122424293	-6.2442	4.21993517554339e-07
PLAGL2	-6.24325	3.55290731810822e-30
CORO1B	-6.24301	4.63945933259322e-90
LOC122423426	-6.24207	4.41674601220107e-23
MPHOSPH6	-6.24074	3.78158199576585e-26
PARD6B	-6.23987	1.01081332673093e-10
CCR3	-6.23928	4.15791046346012e-120
RHEB	-6.23877	9.98396170126828e-26
SMOX	-6.23828	1.14642430273827e-19
CNTN1	-6.23709	1.96530176213586e-07
TIMP2	-6.23618	9.98715941281304e-149
SCAF1	-6.23343	4.00918949457357e-63
P2RY8	-6.23147	1.54028732397717e-88
USP11	-6.23143	1.83123306848066e-149
HABP4	-6.22976	2.06573360353287e-38
LOC122432361	-6.22876	8.15163885023344e-08
MRTO4	-6.22626	2.1456729317625e-46
PAK3	-6.21851	1.0394549636169e-14
EML2	-6.21609	1.54363780246248e-108
SLC6A8	-6.21524	8.23701106408483e-33
OLIG1	-6.2073	4.07983401726837e-38
PLEKHA8	-6.2066	4.28812879495615e-23
RAB35	-6.20435	2.7313017585685e-129
WLS	-6.203	4.80759990887934e-150
SFXN2	-6.20085	4.74301919878587e-52
PGLYRP1	-6.1997	1.26275357979179e-52
BAG6	-6.19259	1.35236336758416e-66
TNRC6A	-6.19077	1.20710884429066e-128
BAZ1A	-6.18908	2.23452353828512e-84
LOC122420388	-6.18665	4.93514458442066e-08
ZFAND2B	-6.18575	2.54574778893387e-107
LOC122435016	-6.18142	4.17338146539477e-20
LAMA3	-6.17785	6.20316813657005e-26
FGD6	-6.1752	3.30544030083568e-28
TMEM81	-6.17087	2.32846844322177e-32
SERINC4	-6.16891	7.28783355101115e-58
LOC122420189	-6.16708	5.9719399755901e-14
PRUNE1	-6.16546	1.83916620008421e-71
RMND1	-6.16415	1.36458551427622e-28
WIPI1	-6.15381	9.88130197745444e-29
SPAG8	-6.15253	7.48296188972196e-20
SLC9A1	-6.15152	4.91441727972917e-79
FAU	-6.14149	8.01021424530058e-90
SPSB1	-6.13866	1.14394892852881e-41
RAD54L2	-6.13147	2.36392211217823e-105
PEX16	-6.13031	8.01350710692408e-48
ATG2B	-6.11312	5.92193753095586e-32
OGDH	-6.1079	5.09043646821534e-79
SSH3	-6.10357	8.97690805974851e-89
HMGN3	-6.10299	2.0934225951063e-13
ZFP3	-6.10085	5.07382342040514e-09
PCED1A	-6.09765	2.19426040747065e-41
PEBP4	-6.09697	2.43625770677216e-09
LOC122429464	-6.0964	1.51582513540281e-13
FAM234A	-6.09277	2.61548441546773e-67
LOC122436013	-6.09166	1.93629383629842e-56
LRFN4	-6.08397	5.63652989197277e-08
NUDT19	-6.08314	4.51844678005029e-82
HSPA13	-6.08198	3.20654069924067e-20
ZNF683	-6.07933	2.61897803245548e-47
LOC122420204	-6.07157	2.22606313615253e-20
CCN2	-6.07041	4.03905293991689e-08
C21H12orf57	-6.07013	5.06207463959268e-102
GNG10	-6.06465	4.47323068382762e-12
SLC52A2	-6.06381	1.11547993866955e-85
HYPK	-6.06223	7.44492027109111e-44
THTPA	-6.06196	1.69725918912434e-38
TNFAIP3	-6.06176	9.27847938580447e-80
PHC3	-6.05744	3.46649088466318e-48
CCDC77	-6.05548	1.35310297221557e-35
SARAF	-6.04996	6.4806091573585e-117
YIPF1	-6.04692	3.15947484656929e-67
P4HB	-6.04144	6.22822705728361e-226
RAB3GAP1	-6.04036	1.77604483493897e-143
ZNF768	-6.03622	2.45892432133704e-37
SCARF1	-6.03442	7.27927785611971e-21
LOC122434456	-6.02597	6.69886798337976e-07
ATN1	-6.0243	1.20684469687715e-59
LOC122432323	-6.01847	2.09604962108006e-10
FGFRL1	-6.01373	1.93480952409783e-09
TAF2	-6.01042	1.38584214086243e-44
COPS4	-6.01004	3.16505854659368e-76
TTF1	-6.00573	3.20390901001903e-65
LOC122429106	-6.00292	4.48349210921163e-135
PRDM16	-6.00252	1.40292778238132e-07
PMPCB	-6.00241	4.57566292715412e-25
LOC122435942	-6.00158	1.58239676506554e-08
TBCC	-5.99686	3.91313952063064e-88
XPO5	-5.99553	7.59246610443854e-91
CUX1	-5.99284	1.04804302429923e-102
THOC2	-5.99148	3.76139163172066e-73
MED12	-5.99079	1.30759555972566e-128
PIK3R1	-5.99005	3.56064991620451e-158
XRCC1	-5.98708	6.34455767921329e-53
UGGT1	-5.98211	7.45721998952085e-88
SPATA48	-5.9818	1.2842352557885e-12
ZFYVE19	-5.97238	3.42928415927959e-32
LOC122429597	-5.97071	1.1086093457202e-05
SIRT7	-5.97067	1.14690825404877e-163
C21H12orf4	-5.97032	9.80878258562139e-66
LOC122426577	-5.96957	7.6040995819534e-76
RAD1	-5.96783	9.65421166055828e-36
SLC25A22	-5.96345	1.32071606458762e-31
NTHL1	-5.96252	2.13120159498006e-24
TRAPPC11	-5.96034	2.28821937642674e-85
UBE2Z	-5.95186	3.00054268426741e-156
CHSY1	-5.95042	1.29393609732845e-80
LOC122423150	-5.95026	7.41537346293535e-21
ZNF853	-5.94842	2.56598522716284e-24
RAD21	-5.94511	1.69577922867731e-179
TMEM201	-5.94017	3.31320227687315e-39
USP6NL	-5.937	2.14002606632129e-34
FCAR	-5.93004	6.01993841065975e-20
PLAU	-5.92854	4.34845452398948e-96
PELI3	-5.92681	4.3339052622095e-29
TRIM27	-5.92161	3.62660207060361e-99
SREBF1	-5.9166	1.14806108073229e-31
NUFIP2	-5.91423	6.2577525239268e-45
SMARCC1	-5.91122	6.23159943037871e-183
NR6A1	-5.91083	2.49470042132797e-09
ZNF839	-5.90987	2.81455330699909e-40
TMEM151A	-5.90909	3.68633313526068e-18
FRMD5	-5.90457	2.48425137900643e-14
CASK	-5.90124	1.69269646048072e-16
STARD5	-5.90066	1.76962055714536e-50
TTYH1	-5.89636	1.27215094147196e-40
RAP1B	-5.8958	1.61847790597455e-23
SNRNP70	-5.89173	1.85142078065946e-143
XAF1	-5.89098	5.77932323863233e-94
AGA	-5.89069	1.5217931269673e-76
LOC122430763	-5.88897	4.64385555801828e-12
TAF1	-5.88705	3.10322606288138e-64
TPD52	-5.88696	4.03714845565084e-36
NIPSNAP1	-5.88547	4.85041691951983e-53
HIBCH	-5.87442	7.26696836123955e-20
MLST8	-5.87349	2.00098241210618e-38
TNRC18	-5.86978	4.31894408303206e-145
ARHGEF1	-5.86653	1.01760163358665e-159
STING1	-5.86422	6.77624727827959e-157
PPP1R37	-5.86094	2.38849651120635e-71
CCDC12	-5.86045	1.172234637962e-160
SH3BP5L	-5.85947	5.0853324191137e-116
LOC122455026	-5.85881	6.14484503321496e-05
KCNQ1	-5.85536	9.28202313115915e-31
RCSD1	-5.85534	NA
STK35	-5.85401	6.40319818350662e-125
ALDOA	-5.85248	3.96291462807056e-93
NIP7	-5.84984	5.50633323244074e-29
RBM23	-5.84321	4.23389304464692e-159
EFHC1	-5.84093	7.60182711620361e-08
DIRAS2	-5.84022	1.00522428488321e-07
RB1CC1	-5.838	1.57912557187332e-147
TM7SF3	-5.83623	1.26053040831451e-62
EFCAB12	-5.82773	2.98507657380345e-07
OGFOD1	-5.8271	3.43402129433565e-30
SLC1A4	-5.824	2.4243430777531e-90
LOC122433413	-5.8204	1.34855206738865e-14
LOC122428302	-5.82014	1.69182293061192e-166
LOC122420178	-5.81998	7.4757897367146e-07
OMA1	-5.81942	3.22982265171858e-25
TOP1	-5.81927	2.28239648747197e-113
SNAP23	-5.81184	3.66123429740785e-61
CWC22	-5.80326	3.04491061168496e-45
LOC122431993	-5.80114	1.86146210269604e-19
WDR73	-5.79822	6.98542916556691e-49
SYT8	-5.79681	5.35715706758631e-06
PAFAH2	-5.79005	8.45719259753352e-57
EIF1B	-5.78538	5.48088994381809e-48
MTMR12	-5.78416	5.15519452879804e-96
ELF4	-5.77982	8.5390895554209e-177
RHOC	-5.77692	3.9111040563364e-68
MRPS12	-5.77321	5.1100919790635e-64
TOP2B	-5.7681	4.28964556907945e-78
SRF	-5.76642	6.42193375864968e-109
LOC122429732	-5.76477	3.90998656503285e-16
EGFL8	-5.76368	8.62744321041846e-10
PIK3AP1	-5.75956	3.17825289219099e-102
TCFL5	-5.75685	2.73092186627794e-23
PRKX	-5.74878	2.71924024604589e-44
MFGE8	-5.7446	2.1778256242294e-45
LRRC70	-5.74405	4.30916490224431e-06
UNC13D	-5.74362	1.13092938083125e-83
WIPF1	-5.7436	4.07280675935752e-66
SNX9	-5.74087	9.1260814643491e-105
LOC122436231	-5.73963	2.35836061772449e-23
SLC25A19	-5.73855	2.86473327202583e-53
LOC122435840	-5.73623	3.8484733329199e-45
CRYBG3	-5.73426	5.40524408129352e-29
SNED1	-5.73418	6.01646210691093e-08
TSPAN17	-5.73405	1.23264107663756e-195
SEC11A	-5.73224	1.9411574976301e-140
PRKCSH	-5.72855	1.77775872628341e-99
SHARPIN	-5.72749	4.48934225639147e-77
SLC25A39	-5.7269	3.71900587966875e-21
VASH1	-5.72317	1.70006581889782e-53
ATP6V1G1	-5.72244	3.13885059434043e-36
SRSF11	-5.72212	3.56833101025749e-143
LOC122434481	-5.72157	1.7474540600571e-08
AIF1	-5.72128	1.40256773308773e-97
LOC122421412	-5.71754	5.20495995273521e-07
PELI2	-5.71525	2.28862841471907e-47
LOC122421476	-5.71009	4.33526992635823e-172
SLC25A26	-5.70921	3.37774841154472e-48
ZMIZ1	-5.7023	3.30032914357146e-71
RPL23A	-5.70226	3.24610839642075e-181
ARID1A	-5.6974	6.31323324025121e-137
POFUT1	-5.69709	1.53564932311733e-120
TRAPPC6A	-5.6965	5.80377191836598e-41
SYNRG	-5.6959	2.26509649982816e-160
TMEM94	-5.69541	9.36696328633888e-116
SDHD	-5.69096	1.00002715239353e-75
LOC122426496	-5.6906	5.32902342877139e-14
PGAP1	-5.68613	3.00561289179333e-05
PIN4	-5.6861	5.01398089747996e-09
LOC122423126	-5.68553	3.74806407476434e-27
TAX1BP1	-5.68518	2.61203433638741e-46
DDX19B	-5.68314	7.46201920304192e-87
SGTA	-5.67866	1.06441000035644e-91
PHTF1	-5.67561	3.57330000999608e-33
LOC122435269	-5.66717	4.27835999809534e-77
CAB39	-5.66358	4.70051384454294e-102
PPP2CA	-5.66349	4.78128377182662e-275
LAG3	-5.66245	1.28155815979819e-32
ALAD	-5.65943	1.52912114983343e-28
C23H18orf21	-5.65869	3.88618184755703e-19
HYAL1	-5.64941	5.81180595337566e-22
LOC122421201	-5.64855	4.69900155430514e-24
UNC45A	-5.6472	2.11578445211217e-89
BCDIN3D	-5.64619	5.79651346257317e-64
ZFP64	-5.63974	9.55965457646663e-22
PTCD2	-5.63724	1.83294430585859e-25
LOC122427710	-5.63619	1.98645391762007e-32
LOC122455274	-5.62723	8.6641719633349e-08
GEMIN7	-5.62577	3.0354331183394e-93
PPIA	-5.62295	6.88429325156922e-217
LOC122431881	-5.61942	1.184541925141e-06
ACSL1	-5.61643	5.82660749022541e-71
PLD4	-5.61508	3.84745981448167e-88
CASP6	-5.61497	4.0202552842544e-36
IDO1	-5.61396	1.98166018775951e-17
FAM118A	-5.61342	5.24435789722232e-77
RPS8	-5.61101	1.73678684286605e-51
BSPRY	-5.60983	1.17830730617537e-28
RANGAP1	-5.60639	6.40376227430548e-63
LOC122455316	-5.60432	1.19827881595961e-10
PIDD1	-5.60073	1.88519058891395e-12
LOC122421411	-5.59893	5.37488174753203e-22
CDK10	-5.59301	7.77807247032601e-99
CXHXorf38	-5.59054	1.57883876927764e-87
ZNF512	-5.59043	1.83746289777765e-55
NIN	-5.59024	2.71124591004727e-70
SHISAL1	-5.58561	8.32346046971745e-23
DHDDS	-5.58369	4.91639083469331e-91
CIITA	-5.5835	2.88092581431942e-80
LSM14A	-5.57403	1.69678790141364e-41
PAX5	-5.56931	2.55304232899166e-87
FAM76A	-5.56547	2.31793783720408e-42
RCHY1	-5.55814	1.57195408862967e-30
TMEM69	-5.55224	1.18021000592004e-23
BHLHE40	-5.54829	2.99703189834905e-31
TAC3	-5.54606	1.23308389419456e-07
LETM1	-5.54178	2.68060412292238e-74
EPHA2	-5.54085	3.40457329787729e-20
ECI1	-5.5398	4.23864878380701e-66
RB1	-5.53699	4.64082119931772e-57
SELENOH	-5.53097	2.26441503422035e-32
ZNF609	-5.52975	6.84829427092918e-84
TMEM129	-5.52963	2.37620193530038e-112
NOP56	-5.52895	2.03048285765842e-102
HDAC2	-5.52759	1.0615673988719e-40
ZNF74	-5.52539	9.17285044052657e-39
PGD	-5.52149	5.32882215798558e-108
CCNG2	-5.51483	1.22574322602132e-25
FYB1	-5.51204	9.89839067656004e-203
TAF6L	-5.50306	1.32671615311882e-63
SLC16A10	-5.5018	1.85009553877087e-06
PIM2	-5.50153	7.69419514502359e-103
TLN2	-5.49709	3.5837964174883e-52
UNK	-5.49327	7.69566085443601e-34
PAX9	-5.49166	2.30541700826903e-05
ZFP91	-5.48983	3.04754160005522e-164
PFDN6	-5.48847	3.96796241724286e-85
LOC122420101	-5.48795	9.3904134949512e-41
TTC28	-5.4867	1.02133582425937e-49
ADAM28	-5.4855	3.78904265463728e-26
STOML1	-5.47984	2.79560478011591e-58
RNF138	-5.4785	1.91516399167161e-16
HP1BP3	-5.47171	3.1187319461995e-273
SMYD1	-5.4636	2.35798419586946e-08
RALY	-5.46304	5.87099610349014e-104
ERF	-5.45982	6.12007905691453e-34
RAPGEF1	-5.45761	6.60936314246021e-121
KCNQ5	-5.45469	1.81454028538602e-24
PAFAH1B3	-5.45373	8.33787949525142e-17
RMI2	-5.45363	4.64681242299394e-20
LOC122433216	-5.45212	9.83615706179188e-108
TXN2	-5.45208	1.27204048803792e-102
LOC122455063	-5.45152	5.45405355736773e-61
CNKSR1	-5.45148	2.39504385483697e-12
LOC122423336	-5.44635	2.33604907238856e-14
GATA2	-5.44571	4.43638067337441e-14
PTPRO	-5.44412	1.36294424362148e-39
CLEC4E	-5.44068	2.09353819628488e-07
LOC122432056	-5.44045	1.69649460435662e-07
ZFP36L1	-5.43986	7.56984952082517e-154
LOC122426701	-5.43944	1.29677936710102e-08
MIS18BP1	-5.43849	6.89004007841024e-14
PDE3B	-5.43806	2.4582039125622e-106
SLC39A10	-5.4357	1.43036992402388e-38
PRRC2A	-5.43441	3.11338453270255e-29
XRN2	-5.43177	1.31716296217184e-207
OFD1	-5.42738	7.62585501379299e-99
GARRE1	-5.42637	6.33010955034287e-96
NAA35	-5.4257	8.56260021218301e-39
ANKRD33B	-5.42219	2.8300706224182e-23
SNRNP27	-5.42157	5.2667565464311e-11
WDR1	-5.42156	1.88913730859109e-113
LOC122420377	-5.41178	2.08620026208848e-07
ZNF420	-5.40825	4.82763144520095e-18
LOC122430028	-5.40485	2.87255086009368e-09
SLC7A2	-5.40469	1.66647348659901e-06
ANKRD42	-5.40074	2.37009332382168e-27
POMT1	-5.39925	6.76568087780365e-41
LOC122420079	-5.39752	2.73441029618304e-27
TPMT	-5.39122	5.19689020082567e-17
LOC122420614	-5.38855	1.31362206925015e-16
MED18	-5.38783	8.01297374153537e-21
CCDC106	-5.38154	2.41288679714535e-14
KIT	-5.37931	2.0477581190142e-39
LOC122422364	-5.37783	9.30939575250436e-31
SMIM27	-5.37537	1.9741440940149e-05
LOC122436024	-5.37386	1.68523808066608e-33
FURIN	-5.37315	1.8525957158923e-73
RASA3	-5.36691	2.70320268516664e-149
PTGES3L	-5.3623	2.75099411950459e-07
RHBG	-5.36037	6.80449069399959e-25
JAM2	-5.35704	2.06671090277241e-28
TPST2	-5.35561	2.54185138287735e-121
DNAL4	-5.35104	3.01065588427883e-32
THOC7	-5.34532	4.84913894168125e-32
IL10RB	-5.33235	1.06350686894079e-82
ZSCAN31	-5.32872	8.73932813934291e-16
PLXDC2	-5.3276	1.63228418635462e-50
KIF9	-5.3116	3.60236578474738e-21
SNRPB	-5.31129	2.31635422308515e-93
NCKAP1	-5.30343	1.05891004575429e-09
MAF	-5.30318	2.9813158025297e-65
SMIM8	-5.2966	5.84386344468176e-05
TSEN2	-5.29592	1.36721720765598e-53
LOC122420768	-5.29413	9.13122387212912e-14
H1-6	-5.28713	5.49365590131339e-64
MBOAT1	-5.28656	9.09742484631082e-187
STYX	-5.27856	1.90434763179873e-15
ZNF451	-5.27595	3.00977853551721e-44
PDCD6	-5.27507	2.61229277843714e-17
SLC25A10	-5.27395	4.39850583032335e-36
RELL2	-5.27156	3.37676017413711e-05
C18H19orf18	-5.27068	1.71067467164981e-25
USB1	-5.26917	7.06314255864132e-48
PARG	-5.26881	4.59810876582304e-51
UBE2D3	-5.26881	4.23067598192874e-124
ADAP1	-5.26623	8.58466803402639e-77
LOC122420339	-5.26437	5.72916960036073e-67
TPH2	-5.26415	2.99392272835701e-09
CWC27	-5.25576	4.76065421649749e-67
TYSND1	-5.24583	1.17551536152441e-82
BMX	-5.245	1.4057291822405e-22
LOC122430816	-5.2448	7.05656161845386e-128
IFFO1	-5.24008	1.19967988375767e-69
LOC122428193	-5.23923	2.25828320349662e-13
LCMT2	-5.23764	1.0807983979994e-34
LOC122420030	-5.23646	6.39533119312628e-25
LOC122429902	-5.23488	1.66584035995209e-96
PRKACB	-5.23429	6.08576636652847e-29
PGK1	-5.23253	3.67194487638973e-139
PTPRR	-5.23162	1.22219776714565e-40
VPS11	-5.23041	6.2405489011055e-84
IFNGR2	-5.22912	4.69685686817625e-113
LOC122421105	-5.22594	8.51559422233897e-59
ODR4	-5.2149	5.07195055834296e-17
PRPF18	-5.2118	4.43601100768877e-119
TNFSF13B	-5.20916	1.86186905875181e-11
MTMR14	-5.2028	2.74848090194246e-97
LOC122424259	-5.20278	6.13106233056889e-05
POM121C	-5.19675	5.29322553884574e-94
PLS3	-5.19558	8.46186129364301e-06
RASGEF1C	-5.19418	1.62376363344443e-11
SHQ1	-5.19285	1.9402816139374e-39
EME2	-5.19249	5.25992050419046e-24
MSANTD1	-5.19179	2.68583265439214e-07
PCBP1	-5.19133	4.09563384586154e-166
MBNL3	-5.19009	1.56731510037465e-33
L3MBTL3	-5.18981	7.88739715268419e-107
TMEM128	-5.18735	9.70065949149385e-10
GRK2	-5.18604	1.23325059031375e-106
ZCCHC3	-5.1859	3.83952225229754e-135
UTP4	-5.18557	6.83108483327423e-54
SLIT3	-5.18544	8.62804165330484e-13
CCDC65	-5.1844	1.29605722797098e-12
ZBTB7A	-5.184	4.20279542745097e-97
POLA2	-5.17801	2.41485158781049e-66
ELAC1	-5.17684	7.07237310430118e-67
NME6	-5.17527	5.27626952552085e-29
SLCO4C1	-5.17037	2.36279855282944e-17
LOC122434212	-5.1703	6.50922665414138e-15
BEX4	-5.16498	1.09121791273213e-31
IDH2	-5.16495	2.97379811988104e-132
SESN1	-5.1573	1.37392032652653e-22
EEF1B2	-5.15712	5.14427693859827e-88
CISH	-5.15555	2.19725679761066e-54
SKP1	-5.15453	1.85930677270715e-58
OLR1	-5.15393	1.33614261712623e-08
SLAMF6	-5.15334	1.34757792693764e-70
EFL1	-5.14495	5.5603227502518e-82
FRS2	-5.14121	1.11023264886168e-20
CNKSR3	-5.14058	1.35853297303821e-14
UGP2	-5.14012	8.33112790363297e-155
RPL10A	-5.13988	3.22925082896322e-54
SLC6A9	-5.13833	1.10241130103226e-44
TRIT1	-5.13487	1.07012241235814e-28
NUP85	-5.13266	7.41407454411097e-82
SLC7A6OS	-5.13149	1.88143291495096e-48
ZBTB1	-5.12851	3.11895289789984e-12
LOC122424442	-5.12392	3.66060406968745e-59
LOC122430121	-5.12261	2.84700792385582e-07
SAP30	-5.11915	1.43658200574177e-30
MFHAS1	-5.1169	4.46129620233068e-80
SLC25A44	-5.11657	1.2674654035723e-134
LOC122422168	-5.1157	6.60543264080673e-06
ITGA1	-5.1156	1.95127016777616e-50
LARP4	-5.11041	2.92434996447932e-49
MTHFS	-5.10992	6.24483044073571e-41
THOC5	-5.10806	7.05378287881697e-87
RDH13	-5.10759	5.04633121087408e-25
LOC122433694	-5.10744	8.15914553077902e-05
SHANK3	-5.10682	8.21689923349152e-53
MIA2	-5.09847	6.28095417081074e-24
SAFB	-5.0984	3.06462751710129e-65
NIPSNAP2	-5.09831	4.708957359414e-80
SLC17A5	-5.09755	2.95141072249177e-27
PDZD2	-5.09728	1.66329361368455e-11
RNF26	-5.09604	2.97193236242558e-76
PALS2	-5.09573	3.52062969458325e-15
UBA2	-5.09269	1.34475983688721e-68
UBXN4	-5.09246	4.14032964650411e-119
OAT	-5.09155	2.4006510180046e-192
SNX25	-5.08696	7.10400134994265e-19
NEURL4	-5.08496	1.02253070121393e-75
PRRG1	-5.07892	0.000104895
LOC122454552	-5.07868	1.02793041752485e-82
PRRC2C	-5.07774	5.98512633764333e-157
LOC122427615	-5.07635	3.71041272366653e-07
KDM5C	-5.07591	4.07208102948302e-111
ZNF691	-5.07544	3.9170185427663e-40
LOC122420792	-5.07151	8.09959058101289e-12
TMEM269	-5.06898	7.26903069802454e-06
RGSL1	-5.06892	1.11877861112657e-07
PKP2	-5.06719	1.32801835323996e-15
TMEM120B	-5.06599	1.73494238863137e-28
MTRR	-5.06255	1.06687762146484e-34
ERI2	-5.0624	1.00488776339037e-12
NOXA1	-5.06066	1.35483819813536e-37
LOC122423349	-5.06046	2.51824599411623e-06
LOC122431639	-5.05961	3.04657794597758e-69
MAMSTR	-5.0579	3.41276241051644e-06
TSSK6	-5.0569	1.92329864736695e-23
[truncated: 3,400 more rows]

## Sheet: upregulated
Supplementary Table S9 - Upregulated genes in Adults (D0xD5)
gene_id	log2fc	padj
COMMD7	0.300413	0.0499289
SLC39A13	0.308505	0.0457768
ANKRD26	0.321032	0.0302358
EIF2S2	0.326801	0.0408152
LOC122441927	0.33607	0.020297
RAP2B	0.338091	0.0189759
CHCHD5	0.339083	0.0175443
ATP9B	0.344053	0.0456433
COQ9	0.363914	0.0136819
ARMH3	0.367366	0.00816596
PPP2CB	0.370701	0.00699028
ANP32A	0.371297	0.0132898
HOMEZ	0.375885	0.0268889
ENSA	0.384835	0.0307357
DCAF8	0.385867	0.00962003
LOC122442347	0.386931	0.0429436
CNOT11	0.389535	0.038742
LOC122446364	0.391534	0.0271764
METTL23	0.391803	0.0173808
ACBD6	0.392401	0.0428668
ARID4B	0.393212	0.0343558
SLC25A25	0.397685	0.03249
ACIN1	0.399233	0.0114105
CBX8	0.400236	0.0229047
C13H1orf159	0.405735	0.0252821
EIF3G	0.407587	0.0409252
DERL2	0.40922	0.00988889
EP300	0.40935	0.026177
IL1RN	0.411563	0.0156992
COPS9	0.412194	0.0337915
ALKBH3	0.41454	0.0317548
CD300LB	0.415747	0.0455993
LOC122445143	0.418977	0.0146166
IFT46	0.421816	0.0306036
WDR48	0.422238	0.00613319
DNAJC1	0.423969	0.00621661
ZNF512B	0.424149	0.0294513
DDX55	0.427107	0.0175659
C1H12orf43	0.427473	0.0492148
AHCY	0.428202	0.00820319
FRAT2	0.430408	0.0221698
CDK6	0.432539	0.0349461
MRPL43	0.433853	0.026554
CDK3	0.434853	0.0338145
PHB2	0.436494	0.044383
TRAPPC2L	0.441546	0.0136688
LOC122431143	0.445644	0.0352372
C3	0.450012	0.0287788
GSTZ1	0.451448	0.0301132
LOC122439823	0.454918	0.0380358
NME1	0.457393	0.0304601
SPTLC2	0.459357	0.00217624
SPG11	0.461439	0.0022325
AUP1	0.462165	0.0178331
LOC122451456	0.46297	0.0320142
MMAB	0.464071	0.0142719
DPM2	0.464596	0.0247201
ADAMTSL4	0.465736	0.0461013
CHD6	0.466021	0.0258219
DNASE2	0.466677	0.0100099
ZNF496	0.467847	0.0341034
LOC122432144	0.467927	0.0401656
DDX49	0.468389	0.0422566
MEA1	0.469687	0.0112151
COASY	0.470682	0.0459284
ARRDC5	0.473772	0.006522
GOLGB1	0.475259	0.0143235
EBI3	0.475872	0.028388
NCBP2AS2	0.479094	0.0324448
DCAF11	0.480379	0.0277377
ARRDC1	0.480969	0.0206134
ATP6V0B	0.48103	0.00123587
C4H19orf53	0.482193	0.0197263
PHAF1	0.48452	0.00523654
LZTS2	0.486091	0.0483469
MECP2	0.489112	0.0470602
DNAJC17	0.489582	0.0158571
LOC122439670	0.490687	0.0333198
AP1S1	0.491597	0.0366769
DNAJB12	0.491654	0.00443749
WDR36	0.495725	0.00209605
CDK5RAP3	0.496522	0.0358488
IRF5	0.496745	0.00654568
LOC122446168	0.497064	0.0444057
LOC122440273	0.50015	0.0361507
DPAGT1	0.500423	0.041346
CTSB	0.50054	0.0176444
CTNND1	0.501194	0.0156236
C4H19orf71	0.501379	0.0409693
ZEB1	0.503317	0.000292021
AP1G2	0.503572	0.0211273
FAM32A	0.503951	0.00297462
GALM	0.505903	0.00121601
MICOS13	0.506582	0.0393497
NDUFA10	0.508502	0.0335744
RRS1	0.509405	0.0276851
MSRB2	0.510873	0.0243123
CCDC107	0.511973	0.00111687
SERTAD1	0.512586	0.0399702
LRRFIP1	0.513889	0.003677
PIAS1	0.514827	0.000150447
JAGN1	0.515179	0.00482681
MMP14	0.516586	0.040684
CTNS	0.518449	0.0233534
DPCD	0.521442	0.041074
FDX2	0.525056	0.0265852
RAB22A	0.525091	0.00881744
EXOSC4	0.525682	0.0471559
DDX27	0.525727	0.0474469
DGKG	0.527018	0.0328672
ETV2	0.527364	0.0385362
LOC122453372	0.527573	0.0192106
CBR3	0.528355	0.0170418
HEXA	0.529549	0.00364834
NOL4L	0.529932	0.0207142
EIF2B4	0.530617	0.00555459
NDUFB9	0.531799	0.00207054
LRSAM1	0.53254	0.0214794
APPL2	0.532623	0.0152859
LOC122429434	0.533115	0.0395641
MIEF2	0.534039	0.0432033
D2HGDH	0.534423	0.042839
ATOX1	0.534711	0.00659241
LOC122445907	0.535753	0.0119867
LRRC25	0.537384	0.0385975
CREB3	0.538051	0.00843168
BAIAP2	0.538539	0.0369208
ACOX3	0.540737	0.0164067
CASP1	0.542063	0.038285
TNFSF14	0.54249	0.000468087
ALAS1	0.544217	0.00567249
RSBN1L	0.544481	0.0304713
LRRC51	0.544621	0.0375038
HIPK2	0.545054	0.0120129
BRD3	0.545543	0.011453
LOC122452046	0.545713	0.0134674
LAMTOR1	0.545719	0.000573536
GHDC	0.547758	0.00458555
LOC122441684	0.548061	0.0381324
MTDH	0.550858	0.00716879
LRMDA	0.550915	0.0329095
INO80B	0.550917	0.0115717
STK11	0.551936	0.0214648
RABGGTA	0.552819	0.0395301
MTX1	0.55307	0.0361044
TRIM37	0.556423	0.0155103
ARHGAP30	0.556537	0.0419874
PCNT	0.557368	0.00686642
SNTB1	0.557498	0.0195978
SGSH	0.557956	7.62108326110766e-06
ABHD8	0.558774	0.012904
BCAS4	0.559261	0.00709496
SEMA4D	0.560045	0.00170682
HES1	0.56039	0.026219
CRY2	0.560989	0.0189825
LAMP1	0.563134	0.00531218
MRPL27	0.564682	0.0052993
EMC9	0.564948	0.0312303
SEC16A	0.56502	0.00292684
ATP8B3	0.568328	0.0041517
ELL2	0.569448	0.0351213
SSBP1	0.572204	0.0040611
RAD17	0.572601	0.0318299
GFUS	0.573862	0.00399322
TMEM147	0.575244	0.00828164
MRPL24	0.576195	0.00265389
MARVELD1	0.577073	0.0127126
FCGR2B	0.577859	0.0423857
RBM34	0.578569	0.0012351
CHD7	0.579008	0.0102137
JAML	0.580201	0.0141545
SIMC1	0.580517	0.0164377
XYLB	0.580861	5.87786150499694e-06
NUDT17	0.581664	0.0238217
C5H9orf116	0.583352	0.0213827
ACOT8	0.583367	0.00290254
GTF2F1	0.584862	0.0451144
TNRC6C	0.58529	0.0020533
FBXL15	0.586098	0.0469206
C6H14orf93	0.586202	0.00526799
CIDEB	0.586578	0.0279665
FLAD1	0.587681	0.02819
NAA60	0.588036	0.0307932
HOXB4	0.588063	0.00448206
HEXD	0.588223	0.0150125
ARG2	0.588479	0.0468975
LRFN1	0.588682	0.0472166
HPS1	0.589216	0.00387312
ARID4A	0.592495	0.0141065
LOC122419753	0.59394	0.0240107
GADD45GIP1	0.59518	0.0387733
ATP5MJ	0.596099	0.000793693
LOC122452285	0.59618	0.00379829
LRP10	0.59655	0.0226813
LOC122448045	0.597166	0.0441594
ATPAF2	0.597202	0.01137
BRD4	0.597513	0.0208336
RALGDS	0.597573	0.0112015
NAGK	0.597812	0.0199523
MCOLN1	0.599414	0.00499614
C10H20orf27	0.599597	0.0190084
DHRS3	0.599668	0.00904609
ARMC7	0.599693	0.0200359
SLC12A7	0.60037	4.17682887223694e-05
CNTNAP1	0.601102	0.0457311
POGK	0.601271	0.00594836
ZNF641	0.604107	0.0403026
MRPL12	0.604317	0.0029383
ALKBH7	0.605041	0.00533393
PEX26	0.605775	0.000385641
NDUFA13	0.605897	0.0156547
SPDL1	0.608085	0.0186386
B9D1	0.608358	0.0256641
MRPL54	0.609337	0.00593383
LOC122452018	0.609441	0.0436201
ISOC2	0.609801	0.00896098
SLC7A5	0.61035	0.0449664
GPR108	0.611952	0.0107438
PDPK1	0.612945	0.000607909
XPR1	0.61297	0.0161106
MAP2K7	0.612999	0.0226967
DHRS7B	0.613149	0.0137944
TRIM4	0.613328	3.75956202941596e-05
MARCKSL1	0.614521	0.0421189
LOC122434135	0.61486	0.00663846
LOC122449484	0.615978	0.0432856
NSMAF	0.618762	0.00034983
REXO2	0.618791	0.00077207
AJUBA	0.61903	0.0470335
ASCC2	0.620029	0.0387217
PDE4D	0.620579	0.0049513
LOC122444845	0.622565	0.0457101
LOC122436714	0.624912	0.0174673
LOC122421039	0.625844	0.0309924
GBA	0.625965	0.00852085
NINJ2	0.627906	0.0180748
TOR1AIP1	0.629186	0.0349444
LDLRAD4	0.631116	0.000362717
ZNF646	0.631968	0.0251665
SURF2	0.632677	0.000519141
LOXL3	0.632776	0.0222081
JUN	0.635415	0.00611645
CCDC97	0.637065	0.0415904
RIPOR1	0.638762	0.00621038
LOC122450155	0.639565	0.0499289
RNF150	0.639804	0.0291614
LOC122444980	0.640617	0.0469743
DENND1C	0.641521	0.00860798
RABGEF1	0.64222	4.2929376280201e-06
DCTN3	0.642305	0.00707848
AKR1A1	0.643646	0.00638512
RPS15	0.646224	0.000394878
LOC122452302	0.646718	0.00688914
EIF5B	0.647629	0.0155274
CEBPD	0.647903	0.00763193
POLR2M	0.64798	0.000719846
ARHGAP22	0.648572	0.00569854
NDUFS7	0.652271	0.00431255
AP1M2	0.652286	0.0320343
LOC122443201	0.654018	0.000976302
MANF	0.656665	0.000234745
LOC122436913	0.65799	0.00318718
TEF	0.658598	0.00600675
PHC2	0.659708	0.00237149
PSMC4	0.660145	0.00177465
DNAAF4	0.660956	0.0403776
LOC122443181	0.660978	0.000400389
LUC7L3	0.661635	0.00739223
NANS	0.661792	0.00474615
LOC122442251	0.661986	0.044383
ANKRD27	0.662974	1.43540903570272e-09
CHEK1	0.66398	0.0169992
PFAS	0.664197	0.00338639
THAP1	0.666131	0.00523168
EPS8L2	0.6678	0.0456682
RAB37	0.669211	0.00289129
MAGI2	0.669685	0.0084407
GNA11	0.671451	0.00802902
LOC122432783	0.672313	0.00315929
LOC122452202	0.672431	0.0186004
DNM1	0.672867	0.0205731
MAN2A2	0.673611	0.000447302
TBC1D10C	0.674339	0.0045857
GPATCH4	0.674417	0.0002248
ARRB2	0.674437	0.00673907
PITPNM1	0.677155	0.0363299
ANP32B	0.677708	7.15115269918587e-05
SAPCD2	0.681386	0.0438007
LOC122440833	0.682849	0.0131689
LOC122453241	0.684466	0.0220605
NSMF	0.685427	0.0335112
BPGM	0.686018	0.0355366
COMMD9	0.68613	0.000937652
FUOM	0.686736	0.00482767
OXLD1	0.687424	0.0128859
CACNA2D2	0.68838	0.0432332
MTURN	0.689883	0.0434768
AGAP1	0.691085	0.0113977
MTRFR	0.691346	0.001013
RUSC1	0.691609	0.00562244
CTDSP2	0.692086	0.000351885
LOC122450454	0.693514	0.032721
KDELR2	0.693526	8.38214271946835e-08
MPHOSPH8	0.694405	0.000202744
CEP164	0.696277	0.00411561
LOC122433910	0.699075	0.0424708
TATDN3	0.700008	0.00460092
VRK3	0.700333	0.000975145
NOP2	0.70196	0.0200282
FCER1G	0.702215	0.0203127
LOC122446763	0.702251	0.0056538
RILPL1	0.702356	0.0282703
SYNGAP1	0.704298	0.0187279
LAMTOR2	0.704649	0.000904409
MED19	0.70587	0.00116267
NDRG2	0.707092	0.00178167
PBDC1	0.707535	0.00954383
EVI2B	0.707983	0.000160095
LOC122453084	0.710033	0.000158284
ZNF189	0.711325	0.00271637
SCML4	0.711708	4.48837045784117e-06
LOC122446062	0.711737	0.0169217
RBM19	0.714673	0.0168924
OCIAD2	0.716988	1.86963800507411e-06
FKBPL	0.717007	0.0066723
AURKAIP1	0.717096	0.00559138
VPS25	0.717171	5.31641097473667e-08
NAT9	0.719395	0.000817599
EGR3	0.720402	0.0367599
IKBKE	0.720616	0.00274405
HDHD5	0.721837	0.00699123
ERCC2	0.723896	0.00668862
NDRG1	0.724383	0.00278641
USP12	0.724526	0.0349794
NPHP4	0.72484	3.09203239154537e-05
CHMP4A	0.725191	0.00421746
KIF1C	0.725367	0.00783991
NDUFB7	0.726058	0.00323868
HAAO	0.726399	0.000219266
LOC122442218	0.727621	0.00941493
LOC122437302	0.728811	0.00049135
HDAC5	0.730893	0.0155108
VPS37A	0.732607	0.00029793
TIGAR	0.732843	3.50957118636241e-05
TMEM53	0.733172	0.0344297
BLVRA	0.734192	0.000185294
SMYD4	0.736372	0.000590732
MCC	0.736425	0.00052792
PALM2AKAP2	0.736676	0.00423758
LOC122449416	0.73731	0.0228437
VAMP5	0.737341	3.46083062647699e-05
RPS6KA5	0.737938	0.000273327
GUK1	0.73996	0.00309729
TOR2A	0.740313	0.00296428
RABL2B	0.742322	1.89784844067468e-07
PRRC1	0.743502	0.0106053
CHI3L1	0.74401	0.0449728
RPL30	0.744181	0.0425349
ZFP69	0.744249	0.0262211
NACC2	0.745607	0.00112321
TOMT	0.745693	0.000430292
ZNF518B	0.745919	0.0113904
SPHK1	0.747648	0.000154762
G6PC3	0.747942	0.00217585
NCLN	0.748833	0.0135148
UBE2J2	0.748934	8.09443181574169e-10
ABCF1	0.748969	0.0166105
NSFL1C	0.749043	0.00688914
ZNF202	0.749256	0.00070992
PNPLA2	0.750486	0.0136338
GRN	0.750505	0.0159436
LOC122440910	0.750661	0.0174391
SRI	0.751981	6.61876568306386e-06
KCNN3	0.7521	0.036178
ADAM15	0.752179	0.0372972
LHFPL2	0.753426	0.0288135
LOC122449474	0.754676	0.0388853
LOC122452525	0.755304	0.0247887
KCNT1	0.755791	0.00367265
POLR2H	0.756272	0.00129983
IFI30	0.756602	0.00452231
LOC122419584	0.756899	0.00933
TFAP4	0.757255	0.000452497
LPIN3	0.757498	0.0205695
MAN2B1	0.758388	0.0349049
LMO4	0.759942	2.37383554271766e-05
GZMK	0.762245	0.00526019
DGAT1	0.762465	0.0125429
DNAJB13	0.764282	4.39301803990124e-05
RNF135	0.765214	4.01710155421976e-06
SSH1	0.765741	4.59378594584659e-06
LOC122438197	0.767818	0.0463611
LOC122438914	0.76933	0.000345768
ABCB9	0.771812	0.00190935
MRPL52	0.771909	8.29866207385536e-05
ZFP2	0.772206	0.0197638
IFI35	0.773946	0.000344467
LOC122448027	0.775701	0.032414
ADCK5	0.776301	1.43398359619661e-05
EIF4EBP3	0.77707	0.00232429
LOC122442515	0.778473	0.0176444
LOC122452561	0.77944	0.00630294
LOC122427322	0.779753	0.00148339
LOC122446022	0.780479	0.0220293
F11R	0.781557	0.019624
EMILIN1	0.781865	0.0139884
LOC122449536	0.782291	0.0282963
RFC4	0.783326	9.78475795231398e-05
MRPL40	0.785341	0.00240827
LOC122424054	0.78655	0.0166394
ALDH3B1	0.786792	0.000923827
FITM1	0.78728	0.00256764
CDC42EP2	0.787647	0.00948248
UBXN7	0.788738	0.00116253
LOC122430530	0.789128	0.000389574
FBL	0.79174	0.000107285
PLCD4	0.793144	0.0368034
SLC2A8	0.793449	0.00225616
LGALS3	0.794313	0.00188043
ARL6IP4	0.796195	0.000609449
HTRA1	0.797903	0.0316754
LOC122434020	0.803013	0.00305193
GK5	0.804318	8.31525042509671e-05
LOC122441823	0.804527	0.0441402
MRPL55	0.804717	0.000666511
SPSB3	0.807088	0.000928704
CRYBB1	0.807598	0.0376476
LOC122445018	0.808219	5.52887225408743e-06
USP39	0.809219	0.000219198
MFSD3	0.809238	0.0469772
CD300LF	0.809928	0.0310667
STK32A	0.810453	0.0395344
LOC122445074	0.813848	0.017629
LOC122449479	0.813947	0.000476277
GALK1	0.814122	0.00232986
LOC122446436	0.815209	0.000973955
SMARCA5	0.816183	0.000193001
ASPSCR1	0.816976	0.0010716
LOC122420265	0.819505	0.00244795
FBXW5	0.820397	0.00280946
SYN1	0.821068	0.0156898
LOC122442494	0.821303	0.0430832
CPNE2	0.821415	9.06585924358139e-05
C4H1orf35	0.822137	6.67603803269582e-05
LOC122448587	0.823021	0.0237691
CCDC191	0.824389	1.56245370503653e-05
TRAPPC3	0.824546	0.000210251
GPR55	0.824632	0.00117149
FGD5	0.824798	0.00287353
ENGASE	0.825162	0.00416418
SUPT4H1	0.826566	1.50127327839733e-12
MDN1	0.826917	0.000114942
IL17RC	0.827199	0.000597568
KCNK12	0.827542	0.0139809
RPL35	0.829233	0.00296774
YY1	0.830054	0.000195709
LOC122453333	0.830896	0.0118611
UBE2O	0.831132	0.000640098
TMED8	0.831852	0.000141703
LOC122446630	0.834716	0.0100745
MAML2	0.835373	0.000686538
LOC122451955	0.837701	0.00764971
TIMP1	0.84131	0.00231391
SLC16A13	0.842744	0.0466204
STX10	0.843901	2.88103486080151e-05
ZCCHC9	0.846382	5.1493140036801e-06
VPS18	0.846959	0.00199107
IRF9	0.847971	0.000296848
ARSG	0.85088	0.00612366
AIMP1	0.851503	5.56697083169486e-05
TAF8	0.855435	0.0010449
GALE	0.855437	9.28695531757626e-08
NT5M	0.85784	0.00573804
GPS2	0.859929	0.0021374
RUSC2	0.860433	0.0154798
LOC122432844	0.860854	0.0013761
GAREM2	0.861405	0.0211194
CARD9	0.863363	0.00180437
ZCWPW1	0.865349	0.00477001
GIPC1	0.866829	9.42909242516398e-05
PCK2	0.867306	0.00129
UBL4A	0.867858	1.66801485629656e-08
LOC122454266	0.868852	0.013857
PPM1A	0.869816	0.00444425
CLTB	0.870112	0.00199347
MOSPD3	0.871176	0.000297701
F2	0.871615	0.0330472
PPP6C	0.871963	6.04295396093084e-07
RAB27A	0.872145	0.00042459
ALDOC	0.872777	0.0359339
LOC122452314	0.872876	0.0419596
ZNF774	0.873622	0.0306036
C2H1orf122	0.878202	3.76598304240987e-05
C2H1orf162	0.878829	1.36414681428772e-05
DQX1	0.880753	0.0165819
ZFHX3	0.881518	0.0175504
GNA15	0.883927	0.000361459
CHRNE	0.886574	0.00636748
LOC122424957	0.887419	2.05022710355081e-05
XPO4	0.887653	1.77755554721097e-08
ADCY4	0.888236	0.0010804
ST6GAL1	0.888949	0.000182406
LOC122424583	0.889183	0.0337549
SLC41A1	0.891322	0.000358903
LOC122427744	0.891718	0.00162221
SENP5	0.892507	4.77191222666678e-05
CTRC	0.892733	0.00170925
LRP11	0.892748	0.00213691
LOC122437123	0.893492	0.0273855
AKAP8L	0.895024	0.00123132
ZNF23	0.895689	0.0215929
RNF2	0.89614	0.00745541
LOC122443097	0.896229	0.0310073
LOC122433435	0.896867	1.44261671486176e-05
VPS37C	0.897129	0.00201578
ERBIN	0.898227	0.0380131
GSDMD	0.898709	0.00188653
FUT7	0.899391	0.00106994
LOC122445618	0.899943	0.045495
LOC122452399	0.900614	0.00371084
RSKR	0.903942	0.0158346
VARS1	0.904928	0.00538078
MAP1LC3A	0.905217	0.00837664
DAGLA	0.905231	0.00624606
TMEM119	0.90617	0.000157496
VEGFA	0.907604	0.00252392
IPO11	0.908617	0.00626234
LOC122440531	0.913172	3.72236567546074e-05
LOC122431037	0.913302	8.30641216121274e-11
IGDCC3	0.914242	0.00139736
LOC122450939	0.915655	0.000597045
MXRA7	0.916681	0.00387256
MBTPS2	0.917339	0.00302147
LOC122448764	0.919051	0.000174218
TRAPPC5	0.922786	4.16845150450489e-09
MAST1	0.922903	0.0269895
LOC122425433	0.923839	0.0386902
MON1A	0.923858	0.00314202
FAM210A	0.930975	0.00454324
UBE2G1	0.933684	1.66781996589546e-06
FBXW9	0.934213	0.00298673
HSH2D	0.934644	0.0013464
SCYL1	0.934659	0.000192569
LOC122448139	0.93509	0.00328498
ZNF598	0.938518	1.65603249995475e-05
STK19	0.939222	5.11277467118201e-06
TARBP2	0.939928	5.67008053958914e-06
C13H1orf21	0.940223	0.00823284
IQCD	0.94287	0.000202563
LOC122432734	0.946427	2.70242334168242e-09
LOC122448041	0.947462	0.000657007
RUNX1T1	0.947864	0.00144121
NAPRT	0.947977	0.00128178
WDR45	0.950544	2.08541227237909e-05
C11H11orf52	0.951789	0.00400253
MACROD2	0.952295	0.0131678
LOC122435810	0.953857	1.59896173570535e-05
LOC122449647	0.95402	0.0453751
KLHDC9	0.955744	0.003552
LOC122441472	0.956831	0.00366469
POC5	0.960797	5.16284612684028e-11
SRP14	0.960936	0.00395151
LOC122451081	0.960952	0.00261064
CAPG	0.963833	0.00583811
LOC122448613	0.964419	0.00637699
MPZ	0.964791	0.0102194
LOC122452136	0.966534	0.00663846
TBC1D22B	0.966607	2.15508893693183e-08
YPEL3	0.968952	1.40618650717939e-05
ARHGAP28	0.969701	0.0119867
CFAP126	0.971225	0.00113539
LOC122437415	0.971907	0.00790234
HGFAC	0.973031	4.14390809112707e-11
PEX5	0.975815	8.80439996952642e-08
ADI1	0.976192	0.00398506
CUEDC1	0.978661	0.00119404
LOC122448297	0.978723	0.00394709
CTXN3	0.97949	0.00267284
RSPRY1	0.979778	7.79056745232723e-06
OTUD3	0.979781	3.43608118836061e-08
DCTN6	0.983213	0.0153607
THAP5	0.984403	0.0363713
SLC22A23	0.98764	0.00710253
KLHL22	0.98785	0.00647727
TDRD10	0.988025	0.000452497
AGBL3	0.988931	0.0341084
LOC122431508	0.989484	0.00656259
KANSL1L	0.993031	0.00406221
BMP4	0.994549	0.00839354
LOC122426861	0.995245	0.0213827
NACAD	0.996085	0.00239845
LOC122432749	0.996347	1.92014982621681e-08
LOC122448780	0.997169	0.00075245
SNX24	0.998583	0.0316754
PUSL1	0.998669	1.6183122832527e-05
LOC122440218	1.00065	0.000678151
LOC122424765	1.00095	4.28385745819077e-05
LOC122447855	1.00124	0.038742
ENO3	1.00197	3.78434130435433e-05
LOC122440232	1.00351	0.00210839
LOC122443894	1.00387	0.0040611
NISCH	1.0046	1.01213631386544e-06
REELD1	1.00477	0.00303686
VPS41	1.00495	3.0915118417274e-08
LOC122431683	1.00841	0.00447966
ADAL	1.00842	2.79290681016348e-08
TPPP3	1.01025	0.00016662
DNAH17	1.01329	6.75985924405852e-05
PLXNB2	1.01348	7.27458646715052e-05
CENPB	1.014	0.000267266
LOC122426991	1.01492	0.0332474
STX8	1.01516	3.19626655023419e-14
RAVER1	1.01589	0.000328902
P2RY14	1.01645	0.011998
MYO15B	1.01725	0.0111605
LOC122454546	1.01818	0.00130219
LTB4R	1.02042	0.000184398
MYH7B	1.02096	0.0196413
LOC122444802	1.02116	0.000428736
FCGR1A	1.02214	0.0450436
HSDL1	1.02376	0.00035113
BATF3	1.02801	0.00885714
NR4A2	1.02802	0.0241334
NXN	1.02854	0.000450076
TCIRG1	1.02881	0.000102319
ATXN7L3B	1.0307	2.11725885114733e-11
KCNJ9	1.0314	0.0260572
TSPAN33	1.03286	0.0368858
LOC122442168	1.03354	0.0299136
DPF2	1.03496	9.73068791881182e-06
GMPR	1.03625	0.00911137
KLC1	1.03677	0.00542744
AOC3	1.03834	0.0251274
HSDL2	1.03884	0.0205735
MZB1	1.04026	0.00896098
TMEM163	1.04098	1.55194168513363e-05
LOC122435182	1.04269	1.52461198198738e-05
VEZT	1.04304	0.0117143
SNRPG	1.04328	1.77137435232209e-06
LGALS9	1.04339	0.000107988
TRIB3	1.0453	1.07637713889876e-06
TBC1D10A	1.04816	2.04150134756775e-06
ZNRD2	1.04911	2.07716237812796e-05
PUS3	1.04933	0.0156954
THNSL1	1.04943	0.00298775
CLEC4G	1.05003	0.00414447
CACNA1A	1.05013	2.05937453720384e-05
TMX2	1.05059	7.00395804864458e-11
MRPS10	1.0528	4.40631886747727e-08
CCRL2	1.05586	0.00104552
CEACAM19	1.0567	0.0120576
TOPBP1	1.05705	1.64201519707281e-15
PSMG1	1.05966	4.50575345428575e-09
SMARCE1	1.06236	6.75422824323016e-11
ZSCAN22	1.0625	0.0349049
ATP23	1.06828	0.000146356
LOC122441622	1.07081	0.00321
LOC122440322	1.07111	0.00234913
NDUFA9	1.07121	8.38965297745399e-06
LOC122437916	1.07201	0.00123226
REM2	1.07572	2.81414432017499e-08
LOC122432750	1.07766	5.1810560022072e-06
HS3ST6	1.08256	0.00898474
NUSAP1	1.08329	1.0108198735264e-09
TRIM35	1.08411	1.35333436791457e-09
ZC3H3	1.08488	0.001274
CREB3L3	1.08713	0.0169675
POLK	1.08963	0.0346622
LOC122420775	1.09129	8.61113294421651e-07
BBLN	1.09261	3.64547471125871e-07
MGRN1	1.0931	1.99520432095526e-06
CPQ	1.09339	0.0468936
LOC122451951	1.09423	0.0204786
ZNF414	1.0944	2.79955245369296e-05
LOC122426816	1.09444	0.000117674
SRSF5	1.09844	4.41232469470956e-05
SLC38A6	1.09905	0.0284707
SMYD2	1.10272	0.000308321
DTNB	1.10329	0.000801617
ORAI3	1.1039	2.97636244936568e-07
KRT80	1.10631	0.030142
UBIAD1	1.10668	2.51079914674553e-10
LOC122446612	1.10895	0.000340638
ARTN	1.11133	0.0237488
CLYBL	1.11198	0.00149209
PRKD3	1.11278	1.24362333679316e-05
UACA	1.11409	0.0188635
SERPING1	1.11441	0.0244141
CD209	1.11524	0.0107789
CLIC5	1.11743	0.000122432
PMM1	1.11922	1.38091580304321e-08
LOC122440756	1.12028	0.000988805
SRXN1	1.12432	0.000229001
CTSZ	1.12504	7.93237584871595e-06
TRIM7	1.12622	4.12401642651037e-05
LOC122420629	1.12674	0.000404424
SPATA1	1.12862	0.0280509
CDPF1	1.12893	2.13193357607135e-08
LOC122442561	1.12918	0.0373173
BAIAP3	1.12952	2.69570475374529e-05
HAUS3	1.1303	0.00615091
BPI	1.13115	3.86806042125373e-07
LOC122437256	1.13246	0.00544475
TICRR	1.13269	0.000135874
RXRB	1.13304	9.76345659110696e-07
TIMM10B	1.13307	0.000320367
LOC122424042	1.13345	2.83847128329013e-07
CRYBA1	1.13619	0.0150352
LOC122450593	1.13681	0.0489653
FFAR4	1.13844	0.00742195
LOC122441988	1.13858	3.07557234646141e-05
EHD3	1.13961	0.00354712
LOC122436726	1.13989	0.00730977
WSCD2	1.1399	0.00582164
ANK3	1.13998	0.00422398
PATZ1	1.14029	4.81539380798017e-10
RPS21	1.14202	2.68422680667524e-09
LOC122431112	1.14345	0.00125293
LOC122439324	1.14567	0.00257117
CBLN3	1.14594	0.00160378
KPTN	1.14736	5.7341313695883e-05
MED25	1.14862	6.22256145761484e-05
GFI1B	1.14928	0.010456
ZBTB25	1.14946	6.22089682285205e-06
ATF2	1.14948	4.22299196434789e-05
TNNT3	1.1534	0.00686061
NELFE	1.15559	6.56868109171208e-06
PTDSS2	1.1558	6.10217706461607e-05
TRMT5	1.15598	0.000468648
RPL6	1.15625	8.90986825646688e-05
RPS19	1.15817	1.8791686969175e-05
NUGGC	1.16108	0.000103923
HIP1R	1.16336	0.00179381
LOC122441138	1.16344	0.00470858
PFDN4	1.16514	0.0226704
UBAP2	1.16542	1.17739085033643e-07
ZNF287	1.16647	1.0008982600558e-07
LOC122453111	1.16675	0.0292275
UPB1	1.16842	0.0025816
LOC122447606	1.1689	0.0379168
MINDY4	1.16912	0.00220118
MFSD5	1.17114	6.44629652753561e-08
LOC122450877	1.17329	0.000895024
LOC122441561	1.17469	0.00832984
SERPINE3	1.17475	0.0108715
TSACC	1.17533	0.0296056
LOC122424761	1.17644	2.59509813938141e-13
TAL1	1.17755	0.0183596
NUP58	1.17766	3.67502332042543e-07
LOC122445870	1.1784	0.00321001
LOC122422848	1.1787	0.041327
LOC122449217	1.17963	0.0139878
LOC122444461	1.18012	0.0187345
SMNDC1	1.18084	6.36571451065058e-06
TSNARE1	1.18087	0.000780687
TGDS	1.18214	0.0173888
CRYAB	1.18235	0.024171
POLR1E	1.1824	2.05416317551708e-13
FSTL4	1.18262	0.0125671
SIPA1L3	1.18387	4.99953324071817e-06
LOC122421715	1.18599	4.85852650884512e-07
TNFSF10	1.19089	0.00668484
LOC122421426	1.19187	1.39292435700692e-05
HOMER3	1.19346	9.39939858710427e-05
CREB3L4	1.19376	4.68394315142546e-05
SPRN	1.19734	5.83887727883428e-07
LGALS4	1.19977	0.00985066
LOC122439573	1.20184	0.0147675
HLX	1.2032	0.000272761
MBOAT7	1.20347	0.00573788
LOC122441611	1.20514	2.66374907805488e-05
LOC122440586	1.2062	1.69935300335687e-06
TARS2	1.20815	3.58115096428752e-12
LOC122446820	1.20831	0.0175642
ZRANB2	1.2101	0.00054845
ZNF667	1.21067	0.000753093
KCNK13	1.21332	0.0180504
ISYNA1	1.21399	0.000127582
LOC122424706	1.21468	1.46031810270243e-05
GP9	1.21661	0.0115244
RO60	1.2172	0.0060656
TMEM101	1.22072	9.80246524002055e-11
MAP3K10	1.2211	5.9842289178594e-07
SLC25A32	1.22373	3.73915495560794e-06
LOC122425503	1.22399	8.2144978858398e-06
STARD3NL	1.22403	0.00159042
CCDC24	1.22483	0.00351454
MUC6	1.22595	2.0789462736384e-05
LOC122447844	1.22639	0.0284707
LIN37	1.22644	3.42202639987686e-07
UROS	1.22685	0.00845872
LOC122422112	1.2294	0.0179748
LOC122420580	1.23015	8.8984028799465e-06
PPP6R1	1.23052	2.73462842815271e-07
NCKIPSD	1.23269	0.000189171
LOC122440908	1.23412	0.0366996
ILK	1.23426	0.00185768
LIMD1	1.23476	7.25906338152446e-15
BOLA2B	1.23492	1.19906596132538e-06
LOC122445274	1.23527	6.85147169143542e-05
FDXR	1.23538	2.77153427360396e-05
SPDYA	1.23607	0.00571792
LOC122431710	1.23672	0.0318073
CUTA	1.2373	1.01010660842565e-08
VAC14	1.23759	1.23349540476825e-07
RAB4A	1.2398	5.32571196014496e-09
ASTL	1.24014	0.00308626
LOC122422854	1.24076	0.0296866
PSMC3	1.24146	7.2583207095374e-07
LOC122438238	1.24153	0.000929062
GPANK1	1.2419	2.55964907416026e-06
RNF187	1.24254	1.20739718498689e-06
RPS27L	1.24292	1.89371281149001e-07
C13H1orf115	1.24313	8.50370023589042e-05
GAS2L1	1.24379	0.000593422
PDE1C	1.24478	0.000624586
SETD6	1.24934	2.14708037940603e-07
GNG11	1.24985	0.00090021
LOC122421812	1.24989	0.0456908
LOC122422839	1.2503	0.0300026
POP1	1.25069	3.00738867866324e-06
RAN	1.25128	0.000180338
WBP1	1.25229	1.83248340479911e-10
PPP1R12B	1.25455	5.3016034306406e-06
GPR158	1.25639	0.00717853
SPRY2	1.25659	7.50956548235894e-05
LOC122443670	1.25778	0.0404934
MPDZ	1.25968	7.33311156810721e-05
SLC25A17	1.2617	6.4390435531e-16
TRAF7	1.26292	4.48418384376733e-10
LOC122420031	1.26335	0.00295555
LOC122429496	1.26515	1.74475860930995e-07
RIBC1	1.26643	5.20725893592654e-06
LOC122448850	1.26667	0.0452632
LOC122433156	1.26704	1.16341083710317e-09
ZNF81	1.26822	0.0166723
LOC122432233	1.26865	0.031657
LOC122438266	1.26933	0.012983
INCA1	1.26954	0.000491046
LRRC4	1.2712	0.0183218
LOC122452146	1.27303	0.00175293
PLCXD1	1.27308	2.6299444701207e-05
WDR35	1.27539	0.000119441
PRKAG2	1.27559	1.08738310889252e-07
BCKDK	1.27696	9.15711109455238e-08
LOC122440654	1.27965	3.27020611315263e-05
SLC25A13	1.28021	4.56361747755974e-10
RCBTB2	1.28095	1.24199928160443e-09
POLR3F	1.28157	0.000589763
EHD2	1.28501	0.00552915
RAD54L	1.28562	1.12283735261814e-13
NOCT	1.28756	5.12527205450167e-07
FAM219B	1.28916	8.58995615710525e-20
LOC122437507	1.28947	0.0042808
MYO10	1.28959	0.000219407
MEX3A	1.29134	0.00451299
LOC122426640	1.29203	3.17349626722682e-10
LOC122446307	1.29428	0.00104128
GPKOW	1.29702	3.48345604209386e-15
TP53I11	1.29708	6.95371554260207e-07
PRKAR2B	1.29737	1.28846019494015e-08
CCDC146	1.29756	0.00816484
PEAK1	1.29974	1.72694653442047e-12
FAM53A	1.30033	0.0177579
CCHCR1	1.30127	0.000501734
LOC122421653	1.30193	0.0231278
SELENOF	1.30198	0.024659
TGFBR3L	1.30222	7.23858987175313e-05
SNRPE	1.30331	2.63879204260702e-06
RALGAPB	1.30371	5.85016730730631e-07
RCAN1	1.30582	2.68058680695952e-24
KIFC1	1.30699	1.7031255021658e-07
ALX3	1.30822	0.0407574
VPS33A	1.31203	1.33423797881882e-11
LOC122449552	1.31434	0.0141891
POGLUT2	1.31738	6.95406217911854e-08
PSMA3	1.3193	0.0137004
PPIF	1.32033	9.26730316014988e-15
LOC122438428	1.32252	0.00139795
SPTBN1	1.32412	1.11333154980277e-16
LOC122451142	1.32661	0.022509
POLD1	1.3272	1.61170233197093e-05
LOC122440649	1.32746	0.0343498
HJV	1.32811	0.000552405
LOC122448097	1.32973	0.0213804
LOC122438651	1.33102	2.21112520675628e-07
VEZF1	1.3319	5.16254125444384e-09
TMEM14A	1.33484	5.12924025023541e-08
LOC122452303	1.33801	0.00388008
TMEM134	1.33943	6.78288722484414e-12
LOC122448491	1.34018	0.0321261
ZCCHC4	1.34495	2.7267011142089e-07
SUCNR1	1.34557	0.000148205
TRMU	1.3456	2.60758075330553e-07
LOC122453991	1.34583	0.036087
LOC122444442	1.34709	0.0120341
FANCB	1.34783	0.0418279
LOC122429550	1.34846	0.00233544
ZBTB3	1.3516	0.000168585
ERCC6L2	1.35319	0.00010455
PNPT1	1.35331	3.72364413751888e-05
LOC122454774	1.35441	1.43526814945267e-07
PTP4A3	1.35589	0.0159831
LOC122447635	1.35747	0.000252597
CCDC90B	1.35867	0.00273352
OSER1	1.3611	2.03465910476175e-13
IPPK	1.36209	1.41790585935257e-08
CORO6	1.36247	0.0236186
LOC122453590	1.36256	0.040508
ZC3H6	1.36299	5.00477403358381e-10
SPTBN5	1.36359	0.00279339
LOC122439764	1.36932	0.00583811
LOC122448470	1.36996	0.0115499
UCHL5	1.37026	4.37774787641336e-09
LOC122427820	1.37246	0.00182106
SH3PXD2A	1.3734	0.000337805
USP33	1.3753	0.00785941
BTBD11	1.37538	2.87021575692781e-07
ANKRD2	1.37906	0.00196538
LOC122453100	1.37928	0.0237292
GPAT3	1.38065	0.000166152
SKI	1.38226	8.37638795309655e-14
SLAMF1	1.38238	2.33293464126628e-07
NCKAP5	1.38447	0.00155194
CHTF8	1.38793	2.18972214526625e-08
CCDC22	1.38923	1.01549539906701e-06
ZCCHC24	1.38961	2.46252477315887e-09
LOC122424310	1.39126	1.01013114508398e-06
PEX7	1.39221	4.71494427841036e-12
FIS1	1.39304	1.45697259099313e-10
ABHD12	1.39363	0.000217433
LOC122424902	1.39379	0.0343997
ASAP3	1.3938	1.56909714966475e-07
RPL27	1.39549	0.000785103
FOXP4	1.39553	6.12338169070137e-06
DDIT3	1.39601	1.24841075081353e-11
IGF2BP2	1.39626	1.5377863653085e-05
NOC4L	1.39659	6.60809337210109e-10
LOC122423283	1.39862	0.00469604
PRXL2B	1.3994	0.00337265
LOC122445041	1.40007	0.0156601
SPTLC1	1.40024	0.000123429
SEC24A	1.40066	0.00225555
LOC122442252	1.40154	0.000786198
MEPCE	1.40328	7.86769366204612e-07
RPS25	1.40369	6.98133748163105e-09
CSKMT	1.40539	2.28163057832776e-17
PIAS4	1.40569	5.13989196971143e-16
TRIM62	1.41187	2.76000699826164e-13
NEK8	1.41294	1.00456749624604e-11
CFAP20DC	1.41423	1.1300835722448e-06
PGBD2	1.41431	5.20757641893317e-08
ALPK2	1.41559	1.78233795411986e-05
LOC122424269	1.41682	6.12126204012302e-11
LOC122436721	1.41767	8.4631439304004e-05
LOC122441056	1.42117	0.0248605
PRIM1	1.42314	2.45939394327336e-05
THADA	1.42561	2.21687151694364e-19
LOC122426185	1.42743	8.53708753858399e-05
FAM120C	1.42835	5.17491684462333e-09
NANOS3	1.42836	0.0291153
LOC122441204	1.42861	0.000997862
PEX12	1.42994	5.61333129270997e-18
RPS6	1.43298	1.02438829944137e-17
TERF1	1.43332	0.000308728
LOC122435088	1.43527	9.05424460694407e-14
LOC122438195	1.43575	0.000118073
LOC122432828	1.43651	0.0108899
LOC122420279	1.44011	6.19881081216868e-07
LOC122430856	1.44197	1.25696824745637e-10
LMNA	1.44343	0.000616596
SNRPD3	1.44371	1.11233324874307e-19
TBC1D9	1.444	3.04347706415499e-07
ADORA1	1.44477	0.00102271
NIF3L1	1.44614	2.0253451711043e-15
LOC122423348	1.44989	0.000316298
RCN1	1.45038	1.12447379094074e-12
LOC122435525	1.45505	0.00079782
SLC35C1	1.4568	7.24384402708048e-10
WDR90	1.46015	5.20908452826906e-11
PHF2	1.46048	1.96605287857848e-13
LOC122429160	1.46071	0.0120576
SH2D1B	1.46178	0.000393501
PPP1R13L	1.46207	2.64544259197836e-20
KCNRG	1.46297	0.000164193
GNG13	1.46442	0.00931904
TRABD	1.4677	1.95774168094801e-20
UBE3C	1.46826	3.43887472372736e-28
SNAPIN	1.46969	2.52085931798728e-27
LOC122420148	1.47673	2.98376381225567e-06
SLX9	1.47844	1.74969597472921e-14
METAP1D	1.47895	5.21407052400142e-08
LOC122446351	1.47929	0.0391128
ZNF576	1.4793	9.15275897802573e-13
ALOX12	1.4805	0.00140544
PPM1M	1.48112	3.44633516402984e-06
UAP1	1.48129	9.13303819204916e-11
SMAD4	1.48148	5.1610217644699e-14
TTC13	1.4823	3.60865739534736e-12
LOC122422514	1.48322	0.000268959
MRPL11	1.48346	2.61544997153359e-09
CRYBA4	1.4836	0.000692828
GCA	1.48419	0.00267296
SIM2	1.48428	0.000422693
LOC122430223	1.4844	7.80224007644984e-06
ADAMTS2	1.49087	0.00431302
LOC122446555	1.49122	0.00313811
LOC122420724	1.49124	0.00120034
TMEM150A	1.49331	3.63067818999762e-10
GLB1L	1.49511	1.25939137304366e-08
MCEMP1	1.49513	8.06727015691728e-05
TOR4A	1.49575	1.9666115723422e-06
PUS1	1.49921	6.93648017100416e-12
ZCCHC10	1.4993	0.00776706
ZC3H4	1.50193	2.19914908667677e-14
SETD7	1.50249	1.5419970015371e-09
PRDM11	1.50353	1.97044317883282e-09
RSAD1	1.5038	3.7960159282662e-22
TMEM131L	1.5056	5.83589246436425e-18
GLT8D1	1.50594	7.14727344115597e-07
SOAT1	1.50771	0.0019956
LOC122442373	1.50799	0.00767047
LOC122421239	1.5112	0.0239222
SLC38A9	1.51374	3.48322351625614e-05
ACAN	1.51376	0.00010108
LOC122438374	1.51662	0.0157428
LOC122428174	1.51777	0.000663209
INHBA	1.51963	0.0159889
LOC122442065	1.51974	0.0146743
C1H17orf97	1.52036	6.89762885942234e-05
GCNA	1.52072	1.43096527963852e-06
FA2H	1.52223	0.0351611
LOC122452044	1.52249	0.000286598
CEP295NL	1.52309	1.81772852571906e-06
PTGFR	1.52375	0.0481259
LOC122454534	1.52473	7.28472607499452e-14
PPP3CB	1.52622	1.06397724623723e-11
GPER1	1.52717	6.68292611379409e-08
POLR2F	1.52736	3.08294185792548e-17
LOC122436002	1.52964	0.0330403
TP53TG5	1.53386	4.49160013979304e-09
C3AR1	1.53417	0.00289583
LOC122447636	1.53447	0.000611056
UBE2J1	1.53583	4.70607094669628e-07
C11H11orf49	1.53774	1.42521827534346e-05
TRMT61B	1.53784	4.61149399641387e-06
STIP1	1.53788	2.71847374104159e-10
KCNIP2	1.53838	4.92238196319036e-05
TMEM8B	1.54039	8.37528281197054e-07
JAKMIP1	1.54083	1.11094335770831e-07
LOC122449430	1.54236	0.000250759
FAM3A	1.54261	3.58768591193243e-17
REC114	1.5427	0.000147369
COMMD8	1.54382	0.00682661
ECM1	1.54417	6.32765848357551e-06
MAG	1.54423	0.00123972
ASB9	1.5449	0.0082022
TMEM249	1.54504	5.03284364159162e-05
LOC122433002	1.55028	3.55547065590336e-07
ANKRD35	1.5507	0.00317463
ZNF599	1.55338	2.55530302432395e-07
GHR	1.55438	0.0035613
LOC122453687	1.55505	0.0052101
PABPC1L	1.55659	1.40322217489722e-15
NUP37	1.55868	4.40396634415997e-13
MYLK	1.56015	0.000418722
SRSF7	1.56159	3.59106726281098e-10
SERPINB11	1.5621	6.16943282925897e-06
TMPPE	1.5629	1.45016128240356e-07
NUP42	1.56359	3.50198788190228e-09
RBM26	1.56375	5.60041684312781e-20
VPS13B	1.56663	6.06478178570614e-14
SLC25A34	1.56751	5.90267999562944e-06
DAPK2	1.56816	3.48872644001821e-05
NAA40	1.56833	1.26687713402502e-09
RPAP3	1.56921	0.000460571
MEN1	1.56925	6.83855352096113e-08
LOC122433928	1.57067	6.31417337920295e-09
LOC122429560	1.57209	0.0444522
TXNDC15	1.57325	2.41772784760431e-13
LOC122424180	1.57487	0.000964061
LOC122451568	1.57501	0.00478154
LOC122442531	1.57502	0.0291629
MCEE	1.57708	3.25791584390924e-15
LAD1	1.57754	0.0495292
ZNF664	1.57776	2.36302436735631e-24
ACTA2	1.57786	0.0499091
LOC122422749	1.58241	0.00401665
CLBA1	1.58246	3.25070717256464e-07
SRRM4	1.58416	8.05833364142357e-07
SC5D	1.5846	8.70622058866647e-05
CTSV	1.58651	2.27646385104886e-05
LOC122443784	1.58823	0.00251525
MEGF11	1.58933	0.00240983
LOC122435939	1.59274	0.000130264
SCRN2	1.59277	1.86665679376978e-08
BCOR	1.5928	3.49923522596798e-13
IER5L	1.59306	5.28600726101721e-05
MAP4K1	1.59399	3.15907389974318e-10
RICTOR	1.59558	0.0105358
PIGU	1.59657	1.1213046971416e-18
LOC122442443	1.59727	2.78236265037921e-07
PGRMC2	1.5974	9.14615369814423e-18
TMEM106B	1.59746	0.00103624
PSMD11	1.59987	2.03703758499317e-15
BCORL1	1.60026	1.41761930613342e-09
F2RL3	1.60045	0.0443416
LOC122433627	1.60062	1.80922464418325e-15
ZNF2	1.60102	3.37944848340783e-21
SELE	1.60256	7.64832293196319e-05
LOC122449984	1.60554	0.00124498
LOC122425749	1.6058	0.0223115
LOC122438652	1.60673	1.058711806074e-07
LOC122423997	1.60788	2.93779357768146e-06
SKP2	1.60832	3.96667447853837e-12
PLEKHO1	1.60946	7.31244743563461e-21
MMP2	1.61227	0.00165555
SERPINF1	1.61325	0.00643085
SDHC	1.62094	2.09479681562812e-23
LOC122442253	1.6244	0.000233776
KIAA0754	1.62703	2.33965821383978e-06
SYTL1	1.62963	3.89348648716595e-08
TESK2	1.63417	1.92185127998386e-20
IRF3	1.63419	2.47519595994951e-12
LOC122446741	1.63498	0.0263945
LOC122432590	1.63576	0.0327483
RRP1B	1.63874	2.68168594845285e-26
LOC122454835	1.63955	3.34668192966999e-08
LOC122427755	1.64057	5.07147126109249e-08
ADGRG2	1.64101	8.35376687746988e-07
TOR3A	1.64125	2.20278314813662e-31
POMC	1.64182	0.000970833
SWAP70	1.64257	8.29407140582731e-34
AP3S2	1.64294	7.1846116564938e-18
LOC122452348	1.64333	0.00332787
PRDX3	1.64385	2.04756128617091e-11
DLEC1	1.64407	0.000258594
CCDC150	1.65082	2.64488626211563e-09
TMEM247	1.65112	0.00919927
FNDC9	1.65301	0.0140694
RAB43	1.65453	2.58595829754973e-15
ENO4	1.655	0.0210015
LOC122448352	1.65847	1.4236473184696e-05
CAPN5	1.6598	0.00213547
NUDT8	1.6599	1.99440059984414e-08
UBR1	1.66036	1.65241476205617e-09
AKAP3	1.66496	0.00369268
LOC122446926	1.66552	0.0343577
TRNAC-GCA_179	1.66614	0.0029261
LOC122433178	1.66652	0.000429786
ZSWIM5	1.66666	2.17061947661351e-07
REEP6	1.66677	0.000108974
LOC122427539	1.66962	1.1558958302011e-07
UBASH3B	1.66979	1.94639700786822e-31
FAM13A	1.67003	0.000285345
SLC39A1	1.67031	3.04216458968866e-31
LOC122441737	1.67181	2.96860665640853e-05
SELENON	1.67184	2.77730502064078e-13
LOC122444801	1.67412	0.00155074
USP46	1.67836	6.89963711656411e-05
TMEM97	1.67896	5.6568635353096e-25
LOC122451562	1.67976	0.0115929
NUP62	1.68109	3.92294833391313e-13
LOC122444724	1.68389	0.00652839
WEE1	1.68482	8.9202483366493e-17
SRP9	1.68539	5.82476469444603e-05
PAQR7	1.68732	7.5855380199711e-15
TEFM	1.68872	0.000132144
PPIP5K2	1.68945	2.49182741978898e-05
LOC122442813	1.69132	4.08378159234385e-05
PSPC1	1.69341	4.72242252877226e-38
EIF1AD	1.69436	2.9188092492379e-21
RAPSN	1.69584	0.00150762
RAC3	1.70207	2.15811570397358e-08
JOSD2	1.70591	1.24375857905773e-14
CCN6	1.70621	0.0403026
PRELID1	1.70673	2.33014769283332e-24
WDR46	1.71038	3.0747533309524e-09
XRRA1	1.71331	3.57573578638171e-13
PSMB6	1.71363	2.58119521248219e-26
TFRC	1.71574	0.000212368
CC2D2A	1.71926	1.01657066141199e-07
FUT2	1.71984	0.0386705
PTPN9	1.72087	1.88143463044434e-34
LOC122446654	1.72173	2.20530569422398e-05
LOC122439716	1.72183	0.0155299
HES4	1.72199	3.42282711830787e-05
PIGZ	1.72236	2.04510240373849e-09
LOC122453723	1.72524	1.68398393753429e-09
ZNHIT2	1.72589	1.56527373009842e-09
WDR11	1.72732	5.67056799842463e-23
PLEKHH2	1.72934	0.00826672
PRKCI	1.73167	0.000275135
TANGO2	1.73366	1.8726566684985e-14
COL4A6	1.73427	0.0299819
UBL7	1.735	3.32400640787967e-08
TTI1	1.73547	1.12398717112746e-12
TBC1D2	1.73567	9.86163203879564e-17
RNF34	1.73728	1.67844220337785e-26
YWHAQ	1.73759	2.55961244261145e-28
ST6GALNAC1	1.73793	2.10446654172982e-10
NSL1	1.73814	3.18990495282884e-11
LOC122427065	1.73901	0.00175877
LOC122423439	1.73995	6.32566229589448e-11
ZNF280C	1.74071	4.92516442723381e-06
CARF	1.74246	4.22016656938366e-07
VGF	1.74806	0.00353504
TAF1C	1.74923	3.52553458697323e-14
USF3	1.74928	9.73050985550023e-06
TPX2	1.75213	2.18187283119947e-12
LOC122455243	1.75693	0.027277
LOC122442372	1.75952	2.04977076569373e-06
TBC1D30	1.76249	2.05860089205377e-06
CCSER1	1.76261	0.00144757
ATP2B2	1.76284	2.87246755446681e-11
LOC122433412	1.76378	2.1591347598929e-21
SLC35E4	1.76605	4.31735551364811e-08
ZNF286A	1.76779	3.64530990577907e-29
LOC122422833	1.77037	3.87451336276841e-05
ANGPT4	1.77077	4.2395842565652e-05
LOC122429724	1.77235	3.33614872136391e-08
LOC122422360	1.7729	1.85941668980735e-05
TP53RK	1.77954	1.36269645712518e-11
REEP4	1.78218	2.95294212687678e-20
LOC122446690	1.78356	0.0487183
LOC122448416	1.78464	5.86126317676451e-07
C28H6orf226	1.78614	3.1833625841316e-30
LOC122435181	1.78695	5.29069178406592e-05
WDSUB1	1.78845	5.77800893055629e-14
FAM71F1	1.79262	0.00650214
SUSD1	1.7938	8.85074714472161e-19
LPO	1.79422	0.000383117
LOC122422362	1.79499	7.21781740792534e-08
ADM2	1.79591	4.3652868852277e-06
SHPRH	1.79915	3.28270774829148e-06
DDC	1.80158	6.16957710102418e-05
COL28A1	1.80216	2.07681001868028e-05
LOC122443519	1.80321	0.0114947
LOC122443704	1.80436	0.0208378
SULT6B1	1.80466	0.0032728
SMO	1.80646	0.00220134
TP53INP2	1.80667	3.5477781085324e-13
LOC122445354	1.81044	0.0106227
NRF1	1.81055	2.58580934256314e-50
PSMD8	1.8107	6.19085460740577e-21
LOC122420618	1.81144	8.92501186457836e-10
LOC122447886	1.81278	0.00729767
ZNF408	1.81619	1.29058885131929e-11
LOC122446267	1.81864	0.0348819
ZBTB22	1.81876	2.27426404943127e-17
CNPY1	1.81879	0.0158998
LOC122433905	1.81967	0.00036994
LOC122423716	1.81985	0.00239564
LOC122437355	1.82058	3.00439206207526e-08
ALDH3A1	1.82075	5.7382823146362e-06
LOC122443406	1.82092	0.0117033
LOC122425524	1.82418	0.00216466
RPRD1B	1.82766	3.99494628118688e-54
PLEKHA7	1.83034	3.15128448460728e-05
SLC23A1	1.83037	4.14230909284913e-06
SPAG9	1.83107	3.24820022142449e-08
RNF43	1.83475	1.44212321394433e-16
PARS2	1.83535	3.64097677090616e-42
SCRIB	1.83816	6.91485639531183e-17
LAMTOR4	1.84171	4.37695748303676e-26
TSPAN4	1.84219	6.68259997971113e-21
ART1	1.84291	0.000416993
MRPS35	1.84378	6.33914234152293e-14
ZNF518A	1.84458	0.000456141
INKA2	1.84609	0.00117639
PDGFD	1.84916	8.66405641474724e-10
AK5	1.85338	0.0258299
DHX58	1.85631	2.76818564023723e-06
LOC122443025	1.85748	0.00046244
LOC122425617	1.85786	2.29594566767941e-07
LOC122453740	1.86011	0.00574873
TAF13	1.86022	0.00363742
UBALD1	1.86306	1.15743439822925e-10
ZDHHC4	1.86371	7.06079193752524e-21
PSME4	1.86627	5.57329479822918e-13
TMCO1	1.86692	1.45187341493196e-18
LOC122450699	1.86843	0.00682
TIMM8B	1.87021	1.24810214277671e-08
CEP76	1.87022	9.60341347445258e-06
LOC122447977	1.87708	0.0214199
POGLUT1	1.8777	4.34780870552096e-09
ZNF862	1.87923	2.86631970517221e-19
SANBR	1.88091	0.0029962
STOX1	1.88487	0.0461366
CATSPER2	1.88491	2.01185241423783e-09
RPL38	1.88565	4.53015574169213e-17
LOC122422462	1.88602	0.0176666
LOC122432092	1.88709	2.21278369846579e-05
PRELID3B	1.89264	1.26567277743655e-21
TCEANC2	1.89491	4.95150935343719e-26
LOC122451704	1.89635	6.06833985913315e-12
USP38	1.89759	6.83688114302066e-14
LOC122436114	1.90109	0.0461113
LOC122447809	1.90145	0.00249282
TUBA8	1.90238	1.02457638991068e-08
SPICE1	1.9026	3.98002353154369e-12
SEMA6A	1.90272	0.00186487
SLC39A3	1.9036	7.03054986880315e-13
LOC122420891	1.90457	1.87362580887427e-16
ZNF22	1.90929	1.28087045590487e-11
LYSMD4	1.90959	4.19347314714107e-31
LOC122424130	1.91247	9.2355580398778e-05
LOC122445456	1.91355	0.036906
LOC122442705	1.91708	9.20027737529958e-05
LOC122443522	1.91936	6.88963449811811e-05
UBE2D1	1.91977	5.5616191741419e-07
COG8	1.92035	1.24167116066567e-17
LOC122427136	1.92169	0.0129292
LOC122442751	1.92362	0.0131522
SMARCB1	1.92473	3.49005964089595e-11
BRF1	1.92831	5.61663455231891e-11
TIMM9	1.92853	6.91564206941149e-18
LOC122446677	1.92969	2.18030870705083e-05
VANGL1	1.93003	1.12028757106216e-14
SMC4	1.93156	9.01499370006107e-10
LOC122447102	1.93173	0.0318073
RBM6	1.93257	1.20213768101973e-26
YWHAH	1.93794	1.29747924243625e-21
PMCH	1.93903	0.00585488
YIPF2	1.93961	1.15243255418104e-12
MPL	1.94268	3.39659407527608e-05
TBX6	1.94331	4.76300255542887e-06
TXNDC17	1.94515	0.000847182
FOXL3	1.9468	0.00377956
CPNE9	1.94843	1.04053305757938e-17
LOC122437553	1.94894	0.0299921
LOC122429690	1.94956	0.000826905
OAF	1.95064	9.15198651957645e-15
C27H21orf62	1.95162	9.75368087503053e-12
LOC122425210	1.95271	0.000479146
RUNDC1	1.95815	1.3845331074858e-40
SDHAF3	1.95836	9.78935540204914e-05
SPRED2	1.95961	6.43398693752848e-15
ZNF692	1.95999	7.57188046354734e-40
PROX1	1.96673	1.00645043815801e-14
LOC122437508	1.96819	0.00404055
LOC122437453	1.97025	0.0125325
EPSTI1	1.97215	3.5916210614596e-06
LOC122425947	1.97276	0.0250945
ENTPD3	1.97595	8.29291352058426e-07
SLC36A4	1.97657	3.82118074209164e-05
LTF	1.97889	9.92984633941883e-05
TRPV6	1.98153	0.00172419
DGKQ	1.98798	1.59603662773222e-18
GANAB	1.98947	7.17003882932523e-21
LOC122424896	1.98958	0.0239775
LOC122432904	1.9912	0.000383982
PYGO2	1.99211	6.76822679648311e-17
LOC122434675	1.99222	0.0463408
BBC3	1.99291	1.54878427487722e-36
SHPK	1.99371	6.31358908500454e-10
AFDN	1.99572	5.96540885187856e-05
RRP7A	1.9976	7.70696134472375e-08
XPNPEP3	1.99835	1.79789765096127e-19
RFWD3	1.99864	1.53022910063945e-28
CS	1.99877	1.02977450748755e-12
LOC122425619	2.00012	3.7369305279584e-15
LOC122435357	2.00406	1.44152050684465e-17
RNLS	2.00689	0.000147624
NUCB2	2.00774	3.44716256561674e-14
OLFML2A	2.00821	7.66470013271281e-05
LOC122425757	2.00951	0.00356645
WDFY2	2.00971	7.24835450423888e-28
PPP1R2	2.01031	9.45003955650113e-06
LOC122445232	2.01122	0.0353022
NHEJ1	2.01334	3.57460273459826e-25
LOC122428167	2.01355	1.44508652475212e-08
OSM	2.01591	5.84309743596476e-12
PITRM1	2.01774	1.50967502591423e-24
PRMT6	2.01879	3.96117998562147e-45
RASSF8	2.02144	0.0189136
BTC	2.02739	0.0230304
DNASE1L3	2.02745	7.36798631403769e-25
CENPT	2.02799	1.42719738791392e-10
LOC122429478	2.02804	0.0249388
UGDH	2.02841	1.90309607409842e-20
PHF8	2.02865	2.30197960949574e-25
LOC122433093	2.02871	1.04650369721313e-19
LOC122447992	2.02874	0.0016998
MECR	2.03087	7.86431337140164e-14
LOC122441160	2.03126	0.00835613
ZNF579	2.03186	9.92477403278934e-12
SGCE	2.03289	2.70095437686252e-06
NRIP3	2.03372	0.00195429
LOC122438442	2.03473	0.0142007
TMEM256	2.03546	2.1027812069204e-07
LOC122431985	2.03857	0.00682363
WDR4	2.04073	2.07741799948339e-25
AGRN	2.04176	3.6648276803932e-05
COL26A1	2.04205	7.64696820182636e-18
LOC122449425	2.04582	5.81646157846558e-06
RPS24	2.04608	5.57159218288375e-05
STAB2	2.04681	0.0134884
LOC122440021	2.04821	0.00169357
PADI3	2.04983	8.56540925886377e-06
PELI1	2.04984	3.37924851922538e-13
LOC122452414	2.04984	0.019054
LOC122434949	2.05172	0.000732688
APEH	2.05312	1.90694882082772e-18
TIMM50	2.05315	4.10530277289083e-23
SFI1	2.05352	2.37578792872374e-22
LOC122420382	2.05413	1.17196613314309e-10
LOC122429462	2.05441	0.00845379
PITPNC1	2.0551	7.00458586615727e-18
EMP2	2.05576	1.63295576537329e-07
LOC122455132	2.05694	4.55147577714324e-05
DMKN	2.05731	1.55421295868663e-10
TPP1	2.05773	1.20546909634566e-39
STX17	2.05798	9.63115510144601e-19
NPL	2.05937	9.1300989382749e-09
TMEM179B	2.06035	4.87521357344782e-45
SART1	2.0629	1.54077817770848e-11
LOC122420040	2.06364	1.50932688445115e-08
TIMM22	2.06407	1.55802163495515e-39
ASCC3	2.06565	1.09751455929018e-20
SPOCD1	2.06792	9.90522328585057e-13
LOC122451668	2.06854	0.00846003
RUVBL1	2.06888	1.42557657788053e-07
ZBTB20	2.07535	9.36578916243534e-24
KIAA1522	2.07611	3.36600297931724e-09
LOC122448618	2.07869	1.28869926380685e-05
SH3RF3	2.07872	6.02636067863295e-06
LOC122436984	2.0793	0.0145143
LIM2	2.07941	1.03599868885065e-07
AIMP2	2.07972	5.49698258357194e-18
MN1	2.08222	0.00645004
TRAPPC1	2.0828	1.03979762182423e-26
RALGPS1	2.08661	2.02341014437219e-19
AKAP7	2.08824	4.47929402295313e-11
ZNF644	2.09104	5.06823745258239e-05
RPS20	2.09213	3.54148352858634e-05
WDR83OS	2.09222	1.4582553786502e-36
ITGAD	2.09271	3.26715083433996e-15
SUPT7L	2.09386	1.47864749541596e-38
PSMD1	2.09815	4.424845301133e-25
C18H16orf95	2.09924	2.77614029158652e-08
SF3A3	2.09926	1.89271270561357e-26
ZNF25	2.10143	3.20348693713073e-05
PPHLN1	2.10317	6.99388296159826e-22
LOC122436518	2.1049	0.00657083
TJAP1	2.10939	6.73238175730913e-43
LOC122430013	2.11047	0.0034116
LOC122420647	2.11112	9.85128593365167e-05
LOC122432901	2.11186	1.05473486813159e-21
EID3	2.11188	2.87101819399173e-12
INKA1	2.11397	1.54753732558338e-16
MOSPD2	2.11562	9.91628104356232e-07
NEPRO	2.11742	9.92599012581091e-10
ST6GALNAC6	2.11811	1.44777304925914e-09
LOC122420480	2.11869	0.0144861
NEMF	2.12074	2.22291535126149e-22
LDHD	2.12266	0.0227899
LOC122425691	2.12357	0.0131466
PSMB5	2.12734	1.34324213746538e-27
FNTA	2.12789	4.44051133946225e-12
NIPA1	2.128	1.40826663046198e-09
PTMS	2.12996	1.78850638432156e-13
TOP3B	2.13014	2.01342758694961e-23
PTPN23	2.13263	5.70084984514568e-11
TLX2	2.13395	1.14113444545443e-06
LOC122420050	2.13577	9.91853431163216e-16
NMUR1	2.14183	3.26780367717861e-11
LOC122454278	2.14409	1.39881426286487e-05
SLC17A9	2.14631	9.10563155244177e-24
ZBTB21	2.15256	2.07976557462745e-13
GPR137	2.15344	5.64524412486431e-19
SMC5	2.15351	3.33367925352326e-06
TSPAN15	2.15357	2.30426882531462e-09
CAVIN3	2.15674	1.84584416718478e-07
BBS1	2.15687	2.59722655410304e-29
RNF169	2.15706	4.25277462493188e-81
USE1	2.15745	2.90673363649627e-15
LOC122430947	2.15871	5.48554357238254e-16
DENND2A	2.16145	1.914570696801e-06
SNRPB2	2.16335	5.31595562381364e-06
LOC122439507	2.16508	0.00206776
SFXN5	2.16549	1.77922492394415e-24
TP53I3	2.16674	1.04389121324944e-34
PDE6H	2.16725	2.34584376746689e-09
WRN	2.17433	1.28309097352003e-09
NENF	2.1753	4.14035951525705e-30
MYL9	2.17597	0.000185294
BCL7C	2.17602	2.21711988522634e-58
PTTG1	2.17635	3.62241958811147e-20
DCDC2B	2.17712	0.000911484
TTLL8	2.17791	8.31468495528345e-12
TCTN2	2.17822	2.01664078238771e-18
CDKAL1	2.17921	2.79747167314682e-63
TRMT12	2.17921	8.82393714976779e-18
TOB1	2.17988	6.28858952398476e-13
TMEM89	2.18016	1.23297799895238e-18
PCGF6	2.18313	1.52218217954793e-08
OSBPL7	2.18526	1.21646163854929e-24
CCND1	2.18611	7.65989644539899e-19
SDK1	2.18666	3.59540150895996e-08
SGSM2	2.18669	2.72479924526927e-24
HIRIP3	2.18795	5.85946678228904e-15
LOC122443518	2.1883	0.0232129
PUS7	2.18832	9.08488698693971e-41
EMP1	2.18892	1.79889962938553e-09
LOC122452387	2.19122	1.04266857669823e-05
PLCB2	2.19201	3.70646012485281e-17
TCP11L1	2.19489	6.35032550028929e-18
PEX2	2.19567	4.17710800267729e-33
SS18L1	2.19653	1.5337166230925e-11
LOC122430100	2.19933	3.36333842611754e-16
ATP10D	2.20189	4.15501059342584e-31
PXMP4	2.2023	6.85118076922544e-18
LOC122435361	2.2025	0.00580951
LOC122432100	2.2029	0.00251538
LOC122448108	2.20302	0.0495376
SPARC	2.20315	2.925425469235e-08
FAM200B	2.20392	0.0019432
LOC122437427	2.20395	0.0273189
NUDT12	2.20459	1.94835596438846e-06
RIPK4	2.20474	2.15648398026642e-12
LOC122424938	2.20602	0.0201305
GREB1L	2.2091	4.52457836494197e-20
GP5	2.20956	0.000173094
IRAG1	2.2122	1.47158089510415e-05
FKBP6	2.21298	1.05872433742485e-32
LOC122434256	2.2133	0.000521953
LOC122435806	2.22415	4.62571361517508e-14
PRPF39	2.22426	7.08977747051298e-06
LOC122442255	2.22643	0.000106625
PASK	2.22768	7.15939091394397e-09
SHISAL2B	2.22828	0.0235692
LOC122422844	2.22856	2.27686343919341e-06
SCAND1	2.22962	4.74957813142296e-18
RASGEF1B	2.23085	1.71708698163845e-28
LOC122432896	2.23148	1.28973541926984e-05
ARL2	2.23164	1.01182383343581e-15
LOC122446762	2.23213	0.00106939
LOC122423344	2.23377	6.35945028535124e-07
LOC122449917	2.23401	0.00787024
UTP23	2.23442	6.02252013112059e-31
SEMA5B	2.23535	2.43439880476134e-22
PIM3	2.23617	5.3813315304863e-61
TNFAIP1	2.23629	1.72816993672043e-56
RFX2	2.23666	3.21853931689664e-20
CLEC4D	2.23685	1.42625182052453e-05
RARRES2	2.2369	0.016252
NUP210L	2.2396	1.30639301372323e-22
ZFYVE9	2.24012	7.03736606930153e-54
PRIMPOL	2.24059	1.10581520513794e-06
DLGAP2	2.24354	0.0492701
TP53I13	2.24512	4.85215629899327e-10
GDE1	2.24633	1.59421172313128e-15
PDCD1	2.2473	7.1886681245036e-12
GRPEL1	2.2534	2.46982037266978e-32
LOC122420864	2.25601	8.26411368029111e-30
SLC16A7	2.25682	2.62047289654923e-14
TMCO4	2.25784	1.08600523782717e-30
TEPSIN	2.26017	5.75386792564805e-24
PIK3R6	2.2617	8.52672754596344e-17
TBC1D16	2.26254	5.43048544125454e-06
PPP4R2	2.26322	1.99864762153461e-07
PLA2G7	2.26358	2.90011506564983e-12
RAD51B	2.26523	1.52154123495335e-16
TRIM6	2.26597	0.0465529
LOC122432742	2.26648	2.12980978632897e-20
SLC25A35	2.26864	1.52965660423976e-37
NOP16	2.27169	3.75170389250613e-19
GADD45G	2.27192	4.23340807395312e-19
TSPEAR	2.27259	0.00309289
PAX8	2.27293	1.06379610849492e-09
PDIK1L	2.27309	2.06547281924957e-06
C24H2orf72	2.27535	0.0187296
PLEKHH3	2.27703	6.26695630836237e-06
LOC122420926	2.2777	0.00853936
PEX10	2.27939	1.27486095506109e-31
LOC122424433	2.27942	2.45022214322011e-15
TOMM5	2.27956	1.36291179201229e-11
PDE9A	2.2798	6.10062746210836e-14
LOC122454446	2.28018	0.00486664
GP1BA	2.28022	0.000403774
OPLAH	2.28029	2.88865381684524e-08
DDN	2.2809	0.000201602
PRMT9	2.28232	6.62179004522393e-20
ZC3HC1	2.28285	6.62546397112774e-33
SPON1	2.28369	7.476036857689e-12
CDH3	2.28483	1.30864926913871e-13
LOC122431841	2.29077	0.00281201
LOC122449652	2.2919	0.000112802
AURKC	2.29787	1.26147391781038e-06
AQP11	2.30098	6.37594144772988e-07
LOC122432023	2.3013	2.64936638823486e-05
LOC122430638	2.30141	8.9047076874446e-09
ZDHHC8	2.30208	3.19255771920597e-35
CPO	2.3027	7.72595334743673e-07
USP28	2.30846	4.49924645124273e-33
PRF1	2.30919	2.42679005481647e-06
LOC122437518	2.30974	0.00298903
THAP12	2.31005	6.43083598746822e-12
NALF2	2.31022	5.58534983533129e-13
TSNAXIP1	2.31168	5.9846303375734e-10
CDK17	2.31281	3.06613300249576e-08
FUT10	2.31435	6.06103593753175e-12
SLC26A1	2.31579	6.23629583486979e-13
LOC122420564	2.31587	0.0378149
FKBP2	2.31612	1.28254227202404e-31
ZNF37A	2.32043	1.15678219024569e-13
ZC3H10	2.32098	4.59472397229688e-54
FSCN1	2.32489	2.17740323154465e-11
TTC7B	2.32899	2.57990614747187e-08
VTA1	2.32972	2.04281767941381e-18
SLC35F3	2.33076	5.20931314492744e-05
SERP1	2.33308	1.09659066767141e-12
CDC42EP5	2.33397	3.75842765570778e-05
YPEL1	2.33469	2.75432656240327e-45
TMEM150B	2.33653	2.79915625138855e-14
FAM229A	2.33705	2.93496440177458e-20
CABLES1	2.33776	5.16429624341796e-11
HEATR3	2.33874	1.3577479278587e-40
RAB11FIP3	2.33901	6.31087604867238e-23
P2RX7	2.33905	5.01134342384534e-18
PM20D2	2.34062	9.8210122900031e-07
WDR6	2.34165	6.40859817278598e-17
TMEM109	2.34413	4.42034472895678e-25
RANBP6	2.3449	1.80996146831787e-06
RRM2B	2.34643	1.92694345740777e-10
SYNJ1	2.34842	7.02604916129982e-31
XRCC4	2.34854	5.66382084359124e-09
SNX4	2.35109	7.31471770866326e-11
SNRNP48	2.3513	3.79377541482035e-44
PDZD3	2.35746	3.36126191751132e-18
PHLDA1	2.36178	5.3753933211724e-16
PTPRG	2.36243	1.06090923184582e-09
SCN1B	2.36252	1.11805572827779e-06
LOC122452030	2.36352	0.0154045
LOC122431086	2.36624	7.41790588437315e-08
FAXC	2.36715	4.34772168449378e-27
RRP15	2.36934	1.63784008339693e-29
EIF3I	2.37027	3.08044952317739e-60
AP4M1	2.37058	1.48642737744909e-23
LOC122447737	2.37241	0.0019956
LOC122443938	2.37249	9.82616517352564e-05
NSMCE4A	2.37348	2.39689094953672e-31
YBX2	2.3738	1.16036622008854e-08
LOC122419957	2.37838	5.33371519105703e-09
GP1BB	2.3786	3.74844690252563e-05
LOC122435807	2.38014	0.0013718
LOC122426740	2.38147	8.30935812468337e-19
ITGA2B	2.38285	5.6973496296204e-07
TGM7	2.38613	2.13435845525844e-24
LOC122454842	2.38675	4.84716879110819e-22
PERM1	2.38757	1.73910965048505e-08
TMEM67	2.39234	2.60594895734692e-05
CLEC6A	2.39334	1.18543996501198e-06
NUAK1	2.39405	0.000155565
TPP2	2.39464	3.46873371334777e-30
LOC122420358	2.39576	9.01284988673624e-08
CRIP3	2.39894	3.71546796139568e-46
PTS	2.3999	7.27387461804553e-05
LOC122430167	2.40035	0.00245382
LOC122450733	2.40051	0.036906
UNKL	2.40139	4.58282039116645e-25
RAD52	2.40282	2.39604995417165e-79
LOC122421116	2.40358	0.00414447
ACD	2.40467	3.13755940328273e-34
XRCC2	2.40518	4.47900575174377e-17
PANK2	2.40565	3.02229578132075e-60
SLC7A9	2.40707	3.45431805079664e-10
LOC122437574	2.40842	0.03052
LOC122428763	2.40877	0.0126963
LOC122454000	2.41029	0.000148113
LOC122439435	2.41033	0.00402187
LOC122426335	2.41359	1.74983054314311e-18
PMEL	2.41409	9.22789255329989e-10
MCRIP2	2.41648	9.37194682714402e-20
PAGR1	2.41782	5.65141771164842e-35
LOC122435945	2.41814	4.04423729826703e-07
VAV3	2.41832	4.25445007304049e-22
ANKS1B	2.42077	0.0011222
PHF14	2.42221	6.26688135374148e-73
PACRGL	2.42233	0.000202685
P2RY11	2.42491	1.28345744108622e-15
VRK2	2.42628	1.28542910879085e-41
FKBP3	2.42705	4.05820793262063e-14
LOC122429682	2.42716	1.19381407647473e-11
PUS10	2.4273	8.48835664359937e-19
PADI6	2.43121	2.34363360000668e-11
CEP135	2.43174	0.000575621
ACP1	2.43244	6.1575432556516e-31
SERAC1	2.43275	1.31678482651519e-20
CHRNA9	2.43587	2.13560920711412e-19
LOC122425553	2.43622	0.00687686
LOC122428726	2.43738	0.000212394
LOC122424859	2.43815	0.00420223
PSPH	2.44045	7.49882858131177e-16
LOC122449109	2.44192	0.0001292
RNF39	2.44296	1.00372233147652e-06
SERPINB13	2.44449	8.13455168744057e-05
RNF157	2.44476	3.72138417123476e-25
LOC122429192	2.44974	1.5087018136139e-08
DNAJA4	2.45059	6.62822454905411e-42
MUC5AC	2.45243	1.63694068311101e-06
MANBA	2.45506	3.85443574660005e-27
SAMD13	2.45639	1.41820338176585e-19
AK8	2.45644	1.60855719373028e-05
LOC122419736	2.45653	0.0359544
LOC122444413	2.45787	0.00287865
DCP1B	2.464	3.0553809741727e-34
LOC122425082	2.46625	2.28503660690893e-10
SH3D21	2.46766	7.48943190687212e-43
GPT2	2.46883	8.27223507049325e-31
MX1	2.46934	1.35523777413914e-11
YAE1	2.47038	3.70039009311805e-09
PNPO	2.47146	5.22983577985512e-63
NALF1	2.47155	0.0487048
TOE1	2.47274	3.82976340802953e-30
RBM27	2.47296	1.65563286744603e-23
SMARCA4	2.47557	1.55629385201987e-22
REPIN1	2.47597	2.41315983351809e-22
TSPAN2	2.47651	5.28439499533176e-13
LOC122432047	2.47679	0.0445115
LOC122421232	2.47747	9.61202587344963e-06
UBXN2B	2.47948	1.30626877490442e-36
PRX	2.48002	1.2891631769888e-31
LOC122437409	2.48036	3.56589270106263e-05
FAM83F	2.48118	4.74491755615543e-09
LOC122432837	2.48118	1.36867599008635e-10
CELA1	2.48289	1.48093014274448e-22
SMG8	2.48389	3.75890362804052e-49
RYR1	2.48405	3.26874788594879e-15
REXO4	2.48479	2.80739142069538e-46
POLE	2.48502	3.54267876733939e-19
SV2C	2.49271	1.68936161812454e-18
VPS29	2.493	2.19667294766872e-09
RAB33B	2.4933	6.84393777577836e-08
TCF19	2.49346	1.14998928673385e-16
NUPR1	2.49511	4.14093003008936e-11
SDR39U1	2.49626	4.04404735646322e-32
LOC122421598	2.49662	0.000193001
NR2E1	2.50124	1.33182194246916e-22
ZNF473	2.50198	4.7142992178022e-12
LOC122432919	2.50243	0.00208925
ZNF84	2.505	1.4929781521802e-12
TRAPPC12	2.50881	8.69818309552471e-26
PIK3C2B	2.50909	8.41751442248348e-43
LOC122428204	2.50999	2.59922122756706e-58
QTRT2	2.51435	1.05911965568401e-29
C28H6orf201	2.51955	0.000302908
LOC122438722	2.51961	9.61706264295299e-06
TUBD1	2.52012	1.09963100647921e-27
LOC122429475	2.52228	0.00209098
YOD1	2.52242	1.4359476092703e-07
LOC122434311	2.52601	0.000428485
LOC122427712	2.52604	3.32173729281565e-33
LOC122454894	2.52615	8.61510542148148e-11
LOC122455299	2.5271	7.10183698193713e-06
ZNF438	2.52979	1.12570530538663e-57
LOC122419726	2.53079	1.28418462313899e-05
LOC122433396	2.5326	0.00198043
LOC122430094	2.53311	4.49686399653478e-16
LOC122424161	2.53334	1.72727517430743e-06
IFT140	2.53611	1.19698211728779e-17
RPL39	2.53647	0.0156454
FBXO9	2.53836	0.0201566
MACO1	2.53873	4.44243151604524e-63
PIK3IP1	2.53933	1.13872391727542e-32
PARD3	2.53954	1.97608825276523e-06
SLC8A3	2.54145	0.00514661
MICALL2	2.5422	3.13295352332449e-15
RNASEH1	2.54431	3.20588274642802e-41
RNASEH2B	2.54472	4.15966642504586e-11
NDUFAF3	2.54552	5.35270917709983e-50
NPEPL1	2.54609	2.16353063742523e-34
LOC122429471	2.54751	0.00046362
LOC122451518	2.54801	3.86087499030091e-05
ANO9	2.54924	5.53078118644347e-22
LOC122430143	2.55692	9.94222011177339e-13
PRR15	2.56053	2.64601095784053e-10
PSMD9	2.56077	7.55117435977346e-48
ARHGAP35	2.56401	7.21432769781222e-27
TSC22D2	2.56444	1.7218229283857e-30
PIGG	2.56501	3.84169411122494e-46
LOC122420371	2.5685	1.65243051635484e-06
LOC122425745	2.57035	1.49804683150298e-20
LOC122430559	2.57158	1.75665465130114e-43
ITGB1BP2	2.57209	8.17652386289216e-51
PDE6G	2.57262	3.0944311691193e-06
LOC122420834	2.57424	0.0205301
PRRT2	2.57556	7.1878390683015e-22
TIGD2	2.57626	1.29044588212554e-12
TMEM38A	2.57867	2.45899465983655e-18
UBXN2A	2.57875	1.26780889379742e-10
LOC122439273	2.57941	0.0324848
KCNC3	2.58062	5.15021505057487e-32
LOC122430881	2.58135	2.01300273963081e-05
SLC7A4	2.58232	9.39544037374178e-05
LOC122426729	2.5846	1.78281519919046e-40
PRELID2	2.58758	5.51144417045414e-79
VEGFB	2.58945	1.06483746953413e-17
MAGIX	2.59109	4.67949811248811e-18
STIL	2.59169	1.49286491015591e-50
SNAPC1	2.59219	1.02798288262778e-13
BEST3	2.59244	7.52266147872008e-05
LOC122445608	2.59339	0.0166861
MAB21L2	2.59743	0.00235855
PSME3	2.59768	4.00619347851823e-43
SUPT3H	2.59831	5.83581382900505e-43
ZNF407	2.5994	6.42518128442859e-30
COL5A3	2.60229	2.71077461553603e-05
LOC122426746	2.60486	2.08350278464866e-31
MRPS34	2.60586	5.62535356490719e-34
LOC122425566	2.60809	0.0142341
LOC122446632	2.6102	4.36678896468393e-09
PLXND1	2.61062	2.19444609859543e-16
GNAZ	2.61163	1.7500646268049e-05
LOC122433650	2.6131	2.3618076633414e-13
LOC122438619	2.61357	0.0142993
TBX18	2.61572	1.0449003076657e-06
VPS33B	2.61574	4.67569227105331e-32
TNK1	2.61575	1.5902782296548e-31
LOC122420325	2.61647	0.00122787
MYL6B	2.61685	4.3306696992057e-17
PGR	2.61879	0.011271
RFC3	2.619	5.28871748686041e-16
LOC122427492	2.61927	0.00235073
LOC122431077	2.61955	0.00115799
LOC122431898	2.62302	0.00106531
TIPRL	2.62313	4.19156122251451e-29
SRSF9	2.62393	5.29723286701529e-46
LOC122424462	2.62549	5.62959032859884e-24
RSPH1	2.62649	2.42117199140425e-28
LOC122425131	2.63027	7.94394518222312e-06
RDH12	2.63102	1.83310390345289e-14
IL34	2.6332	0.000196126
ZFPM1	2.63323	3.85275222944577e-15
CALCR	2.63339	0.0267379
RFESD	2.6354	1.55138367304327e-10
TMEM116	2.63577	6.13093446724547e-06
DNPH1	2.63621	7.69000559428095e-25
LOC122439022	2.63686	3.29774936833006e-06
CALD1	2.63804	1.34387687434279e-08
LOC122450683	2.63988	2.24330764312747e-05
UBN2	2.63998	5.86630514938348e-14
LOC122443958	2.64262	8.46186129364301e-06
LOC122455054	2.64301	0.000238847
PPM1N	2.64351	1.13264990745945e-37
LOC122424346	2.64587	8.89301812685607e-28
LOC122441925	2.64736	4.98649923981226e-05
TNFRSF12A	2.65039	5.56810231837989e-06
TSNAX	2.65074	5.20186193465392e-13
LOC122450861	2.65297	0.00874978
RASL11B	2.6547	1.35228304054546e-12
FASTKD3	2.65923	4.61249757239361e-22
LOC122432064	2.66006	7.04975182889236e-08
TOX2	2.66451	1.67451602847482e-10
LOC122425812	2.66484	1.1350185168845e-16
LOC122426465	2.66642	1.85647797583335e-05
NT5DC2	2.66707	3.10200083940927e-14
LOC122421498	2.66808	1.09297582931079e-15
PARP2	2.66882	1.72459366589588e-41
LOC122444390	2.66888	0.000257547
RRM2	2.67049	1.28386921362855e-34
TRMT6	2.67137	5.82004510905136e-23
LTC4S	2.67158	0.000628815
ITGA6	2.67206	4.43011023479588e-18
LOC122454888	2.67323	7.99927793662456e-06
LOC122421825	2.6757	0.0112108
GATD1	2.67652	7.80591042750561e-42
ZRANB3	2.67826	1.1563928060343e-17
OLFM1	2.67837	1.16274876324906e-07
LOC122423056	2.68052	1.50083723746824e-06
SF3B6	2.68229	5.46803173558581e-07
PRKCA	2.68314	3.31218870012567e-43
SPATA2L	2.68528	1.24912091878185e-21
ERP27	2.68566	0.00749682
LOC122421117	2.68626	0.0219245
TPST1	2.68676	1.85173577921657e-23
TRIQK	2.69009	9.2935091866149e-11
PHTF2	2.69157	1.07263521846322e-06
LOC122432945	2.69187	1.65069659186937e-14
LOC122433878	2.69668	0.0205301
LOC122445281	2.69675	0.00803151
TMEM265	2.69854	3.37786860810804e-26
FOSB	2.69988	2.91952644892524e-38
LOC122438854	2.70204	0.00925737
SUGT1	2.70372	3.15534345497438e-43
TMEM219	2.70409	2.75996824451844e-49
ZNF697	2.7056	4.74518794493869e-22
ORC1	2.70614	1.84342885633146e-19
USP54	2.70672	1.82703000098195e-49
LOC122442779	2.70764	0.00308774
CHST12	2.70813	3.75120132828183e-32
ANO2	2.7134	0.000520807
RPA3	2.71796	2.25053501662135e-09
THBS1	2.71969	4.4202047037952e-12
LOC122427692	2.72105	1.11300932009567e-06
LNP1	2.72187	3.54422506037603e-28
STK25	2.72311	2.02095520245062e-38
LOC122443512	2.72342	2.98614331505644e-05
PCBP3	2.73038	3.60479355791593e-09
TIMP3	2.73263	5.48117419832127e-06
LOC122454573	2.73313	0.0139544
LOC122426618	2.73342	0.00334529
ECM2	2.73511	0.00154217
TCTN1	2.73642	4.43457490560392e-44
TIE1	2.73671	1.84198816409894e-12
PLAG1	2.73702	8.75496463612641e-08
TUBB4B	2.73992	3.45466269067876e-15
SUZ12	2.74081	1.90830344685186e-12
MUS81	2.74105	3.06092935504025e-78
TRA2A	2.74197	6.79750162864719e-37
MCUB	2.74361	1.93738265322212e-26
COQ2	2.74612	1.81719742782733e-23
PROX2	2.75129	3.52978560998181e-14
TAF5	2.75139	1.68289706656913e-69
HELB	2.75243	3.90921846617843e-09
TNFSF11	2.75335	4.67883375466482e-17
CTDSPL	2.75802	0.00699347
SHANK1	2.75873	1.79563827372396e-05
APBB2	2.76393	1.41100678696125e-14
LOC122424836	2.76734	0.0039722
ERCC8	2.76884	2.29598388363004e-07
LOC122432612	2.76922	1.27583559418405e-05
LOC122451423	2.76989	1.58874989028908e-05
TWF1	2.77013	2.46813027656379e-07
CYTH3	2.77029	4.67690817256466e-36
ROR2	2.77071	1.05610935405271e-06
C22H3orf18	2.77358	3.40580215457816e-23
VPS50	2.77506	4.42675615178268e-28
PDE5A	2.77739	1.89521340622551e-31
LOC122455305	2.77742	7.82236395876639e-19
MRPS18C	2.77865	8.72577579194343e-24
NSD2	2.77989	4.32950375647102e-70
SHROOM4	2.7801	4.16443074999932e-05
LOC122426329	2.78021	1.53735191837468e-09
IKBKG	2.78091	2.0871312187133e-29
NIPAL4	2.78103	1.09235427437464e-42
LOC122425696	2.78408	1.4576412199063e-19
LOC122420223	2.78458	2.70545439823495e-07
LOC122429693	2.78536	6.88606481179583e-13
ELOVL6	2.78707	4.94253353662793e-17
LOC122444978	2.78733	0.00101409
LOC122444387	2.78794	0.0357557
LOC122428878	2.79052	1.6954650523265e-11
MYMX	2.79397	3.60329206947275e-15
RNH1	2.79433	2.85512743187049e-22
RNF14	2.7968	2.1781369198065e-11
NEK11	2.80327	7.85469251038825e-15
B4GALNT4	2.8045	3.81030552142917e-20
VAV2	2.80536	2.26238386113939e-27
SLC9A3R2	2.8057	1.62560495035651e-18
LOC122435576	2.81029	4.61947568504358e-08
PIGW	2.81273	7.74957000342899e-11
TXNDC16	2.81346	2.33538805821527e-09
LOC122428468	2.82063	1.07815752599109e-45
PADI2	2.82365	2.41518698237255e-32
SFT2D3	2.82478	1.30940784988861e-17
KCNH3	2.82522	1.4132320436109e-06
SDR42E1	2.82574	1.02837956132214e-29
ZNF770	2.83227	3.34454967606542e-11
MLC1	2.83273	1.3680877374772e-08
SHISAL2A	2.83298	3.30919728136188e-17
LOC122435510	2.83318	0.000909652
PDCL	2.83339	8.43031423689422e-32
XPNPEP2	2.83371	4.88116767333163e-24
PPID	2.83418	8.95244356558446e-58
CHTF18	2.8347	3.25514681792747e-20
AHDC1	2.83999	4.61355984294065e-21
GUCA1A	2.84173	0.00153433
LOC122428405	2.84244	1.18008618545475e-24
ZFPM2	2.84377	0.00327161
PAIP2B	2.84508	1.75078762773587e-21
FLYWCH2	2.84653	5.29266267250456e-18
RBM43	2.84821	3.28044375763826e-51
PER3	2.85138	5.9948382965878e-31
SWSAP1	2.85297	1.43316411826826e-52
NPAS1	2.85727	0.00271539
SYT7	2.85732	4.03668414420667e-44
LOC122432637	2.86023	4.71130682367571e-19
OIP5	2.86192	2.26889068199085e-23
MFSD10	2.86223	1.66980590075346e-42
LOC122451897	2.86278	0.00681269
CD2BP2	2.86426	5.39634931851484e-60
ZMPSTE24	2.86575	7.22793313655505e-27
TRIM55	2.86943	4.12203267319171e-16
YY2	2.86952	5.27764044989176e-33
PGAM2	2.87006	3.93118235716247e-21
LOC122443022	2.87015	0.000118024
ACE2	2.87034	0.000290426
LOC122452857	2.87426	0.00153503
LOC122425471	2.87428	0.00189755
TUSC1	2.87499	6.62622511987674e-40
LOC122434650	2.87577	1.00054494668205e-20
LOC122426659	2.87631	3.86903891665838e-20
PRPSAP1	2.8775	2.58996249490833e-61
PPP1R14A	2.88191	7.39358972291315e-05
MPI	2.88511	5.52383884041788e-29
TRAF5	2.88603	1.73265371689603e-87
[truncated: 2,310 more rows]
