# Supplementary material for: Peripheral transcriptional responses to experimental SARS-CoV-2 inoculation in North American Elk cows and calves
Source: Research Square preprint supplement (doi:10.21203/rs.3.rs-6505643/v1), 2025-05-15
Supplement: Supplementary file 10 [file c9ab1f3b5907b7cd58bc9349.xlsx]

## Sheet: Suppl_table10_MF,BP, KEGG_UpDEG
Category	Term	Count	%	PValue	Genes	List Total	Pop Hits	Pop Total	Fold Enrichment	Bonferroni	Benjamini	FDR
KEGG_PATHWAY	ccad05205:Proteoglycans in cancer	56	1.33048	4.86583e-05	LOC122425560, LOC122446062, CTSV, TNF, ELK1, LOC122432092, CCND1, KDR, TIMP3, LOC122425446, HRAS, PRKCG, VAV3, WNT5B, PDPK1, MMP2, RPS6, RRAS2, PRKCA, ANK3, WNT16, VAV2, SMO, CTTN, SOS1, PPP1R12B, TLR2, LOC122454541, ROCK2, SDC2, TWIST2, PIK3R3, TWIST1, THBS1, EGFR, WNT6, PAK1, RRAS, ERBB3, LOC122421346, WNT10B, WNT10A, TGFB2, WNT3A, WNT7B, LOC122433037, FZD7, FN1, MAPK12, LOC122449484, VEGFA, MA…	1495	228	10427	1.71306	0.0167431	0.0161503	0.015547
KEGG_PATHWAY	ccad04510:Focal adhesion	51	1.21169	0.000115882	LOC122454885, LOC122424593, ITGA2B, ILK, ELK1, ARHGAP35, MYLK3, MYLK4, MYLK, CCND1, TNN, KDR, RAC3, HRAS, PRKCG, VAV3, LOC122424462, PDPK1, LOC122454534, EMP1, PRKCA, EMP2, VAV2, COL4A6, ITGA6, SOS1, PPP1R12B, MYL9, TNXB, LAMA2, ROCK2, PDGFA, PIK3R3, THBS1, THBS4, EGFR, THBS3, PAK1, RELN, PDGFD, MYL10, PAK6, PAK5, PAK4, JUN, VEGFB, FN1, PARVA, VEGFA, MAPK10, BCAR1	1495	208	10427	1.71011	0.0394156	0.0161503	0.015547
KEGG_PATHWAY	ccad04371:Apelin signaling pathway	41	0.974103	0.000170203	LOC122425560, RYR1, NOTCH3, LOC122446062, HDAC5, ADCY4, PRKAG2, NRF1, RYR3, SLC8A1, PIK3R6, MYLK3, MYLK4, SLC8A2, MYLK, GNG3, MAP1LC3A, LOC122420753, CCND1, RRAS, GNG8, LOC122425446, LOC122421346, HRAS, SMAD4, NOS2, LOC122433037, SPHK1, RPS6, RRAS2, GNG11, APLN, GNG13, SLC8A3, ACTA2, RPS6KB1, GNB3, LOC122440910, PLIN1, PLCB1, PLCB2	1495	158	10427	1.80986	0.0573549	0.0161503	0.015547
KEGG_PATHWAY	ccad04310:Wnt signaling pathway	46	1.0929	0.000213442	ROCK2, PRICKLE3, APCDD1, PRICKLE4, WNT6, PORCN, PPP3CB, FRAT2, CCND1, FRZB, WIF1, RUVBL1, EP300, RAC3, SOST, LZTS2, PRKCG, WNT10B, RNF43, TCF7L2, WNT10A, TCF7L1, JUN, SMAD4, WNT5B, WNT3A, RYK, SERPINF1, FZD7, WNT7B, CSNK2A2, PRKCA, MCC, WNT16, TLE6, VANGL1, DKK4, MAPK10, SFRP4, SFRP2, VANGL2, ROR1, ROR2, NOTUM, PLCB1, PLCB2	1495	186	10427	1.7249	0.0713953	0.0161503	0.015547
KEGG_PATHWAY	ccad04360:Axon guidance	47	1.11665	0.000232045	LOC122454885, SEMA5B, SEMA3C, ROCK2, SEMA3B, LRRC4, SEMA3G, ILK, PIK3R3, SEMA3F, NTN1, PRKCZ, RND1, ROBO1, PAK1, PPP3CB, ABLIM2, PARD6A, RRAS, CFL2, SLIT1, RAC3, PAK6, HRAS, PAK5, EPHB4, PLXNA3, PAK4, EPHA4, SEMA6A, SEMA4D, WNT5B, PDPK1, UNC5B, RYK, LOC122454534, LIMK1, PRKCA, SEMA4F, UNC5D, RHOD, RGMA, SSH1, SMO, PARD3, PLXNB2, MYL9	1495	192	10427	1.70732	0.0773719	0.0161503	0.015547
GOTERM_BP_DIRECT	GO:0006468~protein phosphorylation	94	2.23331	0.000349123	RET, LOC122446062, LOC122426731, AMHR2, TP53RK, ULK4, ILK, TESK2, STK19, STKLD1, MYLK3, MYLK4, MYLK, RPS6KA5, CHEK1, PDK4, PBK, KDR, STK32A, EPHB4, PRKG1, SCYL1, PRKCG, MAP4K1, EPHA4, RPS6KL1, PRKCI, DAPK2, RIPK4, CSNK2A2, TEX14, PRKCA, PASK, PEAK1, PRKD3, PDIK1L, BMP2K, TYRO3, SIK1, TRIB3, ROR1, ALPK2, ROR2, SGK1, TSSK2, CILK1, GUCY2C, LOC122452561, BRSK2, WNK4, MST1R, AURKC, PRKCZ, RSKR, EGFR, …	2526	421	15999	1.41418	0.458556	0.61306	0.61306
GOTERM_MF_DIRECT	GO:0004674~protein serine/threonine kinase activity	46	1.0929	0.000401947	BRSK2, TP53RK, PKN3, MAST1, WNK4, TESK2, STK19, STKLD1, PRKCZ, TTBK1, MYLK3, RSKR, MYLK4, STK3, PAK1, NUAK1, RPS6KA5, CHEK1, TLK2, PBK, PAK6, PIM3, IKBKE, TRPM6, PAK5, PAK4, HIPK4, DMPK, PDPK1, CDC42BPG, DAPK2, LIMK1, CSNK2A2, VRK2, PASK, VRK3, HIPK2, SBK1, RPS6KB1, PRKD3, SIK1, PKN2, ALPK2, SGK1, TSSK2, CILK1	2595	174	16442	1.67504	0.354551	0.43772	0.43772
KEGG_PATHWAY	ccad04150:mTOR signaling pathway	44	1.04538	0.000720359	LOC122425560, LOC122428355, LOC122446062, LOC122454541, NPRL2, PIK3R3, TNF, RPTOR, IKBKB, WNT6, SESN2, LOC122425446, RICTOR, SLC38A9, LOC122432032, LOC122421346, SKP2, HRAS, RNF152, PRKCG, WNT10B, WNT10A, ATP6V1G2, LOC122427754, WNT5B, PDPK1, WNT3A, LOC122433037, FZD7, WNT7B, RPS6, PRKCA, WNT16, TTI1, SLC7A5, RPS6KB1, RRAGB, LOC122440910, LAMTOR2, LAMTOR1, SGK1, LAMTOR4, SOS1, LPIN3	1495	185	10427	1.65882	0.221242	0.0417808	0.0402201
KEGG_PATHWAY	ccad04728:Dopaminergic synapse	35	0.831551	0.00112232	ATF2, DDC, MAOB, TOMT, CACNA1A, CACNA1C, ARRB2, SLC6A3, PPP2CB, GNG3, GRIN2A, PPP3CB, LOC122420753, PPP2R1B, CREB3L3, CREB3L4, KIF5A, GNG8, PRKCG, KCNJ9, PRKCA, PPP2R3A, GNG11, MAPK12, GNG13, MAPK10, CREB3, MAPK11, GNAL, TH, PPP2R2B, GNB3, PLCB1, PLCB2, LOC122454175	1495	140	10427	1.74365	0.322716	0.0557955	0.0537112
KEGG_PATHWAY	ccad04015:Rap1 signaling pathway	49	1.16417	0.00192341	LOC122446062, ITGA2B, CTNND1, SIPA1L2, SIPA1L3, LOC122420753, KDR, RAC3, HRAS, PRKCG, VAV3, PRKCI, MAGI2, PRKCA, VAV2, PRKD3, PARD3, RAPGEF2, PFN4, PLCB1, RAPGEF5, PLCB2, PFN3, PFN2, ADCY4, PDGFA, PIK3R3, PRKCZ, THBS1, EGFR, GRIN2A, PARD6A, RRAS, PDGFD, FGF23, RALGDS, ANGPT4, VEGFB, MAPK12, VEGFA, MAPK11, AFDN, KITLG, FGF19, FGF18, LOC122440910, BCAR1, F2RL3, FGFR1	1495	222	10427	1.53943	0.4873	0.0800197	0.0770305
KEGG_PATHWAY	ccad04926:Relaxin signaling pathway	33	0.784034	0.00206947	ATF2, LOC122446062, ADCY4, PIK3R3, ARRB2, PRKCZ, EGFR, GNG3, GNA15, CREB3L3, CREB3L4, GNG8, MAP2K7, HRAS, JUN, NOS2, MMP2, VEGFB, PRKCA, GNG11, MAPK12, GNG13, VEGFA, ACTA2, MAPK10, CREB3, MAPK11, COL4A6, GNB3, LOC122440910, PLCB1, SOS1, PLCB2	1495	134	10427	1.71762	0.512689	0.0800197	0.0770305
GOTERM_CC_DIRECT	GO:0030672~synaptic vesicle membrane	14	0.332621	0.00311289	UNC13B, RAB3A, UNC13A, CLTB, SYPL2, SYN3, SYNGR3, SYNGR4, TMEM163, SYN1, SYNGR1, SLC17A7, SLC17A8, PHAF1	2355	38	15361	2.40311	0.821669	1	1
KEGG_PATHWAY	ccad04151:PI3K-Akt signaling pathway	80	1.90069	0.00324507	LOC122425560, RET, LOC122446062, ATF2, LOC122424593, ITGA2B, RPTOR, GHR, IKBKB, CCND1, YWHAQ, PPP2R1B, CREB3L3, CREB3L4, TNN, KDR, LOC122425446, IKBKG, HRAS, YWHAH, LOC122424462, PDPK1, RPS6, MAGI2, PRKCA, OSMR, CREB3, LOC122453084, COL4A6, MTCP1, ITGA6, LOC122421313, SOS1, SGK1, LOC122454175, TLR2, TNXB, LOC122454541, LAMA2, PKN3, PDGFA, PIK3R3, THBS1, THBS4, PIK3R6, EGFR, THBS3, PPP2CB, GNG3, R…	1495	411	10427	1.35758	0.676278	0.0983573	0.0946831
KEGG_PATHWAY	ccad04071:Sphingolipid signaling pathway	31	0.736517	0.00333802	LOC122446062, ROCK2, PIK3R3, PRKCZ, TNF, PLD2, PPP2CB, SPTLC1, SPTLC2, PPP2R1B, ADORA1, BDKRB2, RAC3, HRAS, PRKCG, FCER1G, PDPK1, SPHK1, PRKCA, PPP2R3A, SGPP2, MAPK12, MAPK10, MAPK11, PPP2R2B, LOC122440910, DEGS2, PLCB1, PLCB2, LOC122454175, NSMAF	1495	127	10427	1.70246	0.686586	0.0983573	0.0946831
KEGG_PATHWAY	ccad04020:Calcium signaling pathway	54	1.28297	0.00339163	RYR1, RET, LOC122453991, GRPR, RYR3, SLC8A1, MYLK3, MYLK4, SLC8A2, MYLK, PPP3CB, LOC122420753, BDKRB2, KDR, PRKCG, SPHK1, TNNC2, PRKCA, ORAI3, PPIF, PLCB1, PLCB2, PTGFR, PDE1C, PTGER3, ADCY4, PDGFA, CACNA1A, CACNA1C, MST1R, CACNA1H, EGFR, HRH1, GNA15, GRIN2A, ERBB3, PDGFD, GNA11, FGF23, NTSR1, NOS2, VEGFB, ATP2B2, MCOLN1, VEGFA, SLC8A3, P2RX7, P2RX6, GNAL, FGF19, FGF18, PLCD3, PLCD4, FGFR1	1495	257	10427	1.46548	0.692382	0.0983573	0.0946831
GOTERM_BP_DIRECT	GO:0098703~calcium ion import across plasma membrane	9	0.213828	0.0037542	SLC8A3, TRPV6, TRPV4, CACNA1A, CACNA1C, NALF2, NALF1, SLC8A1, SLC8A2	2526	18	15999	3.16686	0.998651	1	1
KEGG_PATHWAY	ccad04625:C-type lectin receptor signaling pathway	27	0.641483	0.00404487	PIK3R3, TNF, IKBKB, PAK1, PPP3CB, LOC122420753, RRAS, CASP1, IKBKG, CLEC1B, IKBKE, HRAS, JUN, EGR3, FCER1G, CCL22, LOC122433435, CARD9, RRAS2, MAPK12, MAPK10, MAPK11, CLEC4D, CD209, IL23A, CLEC6A, IRF9	1495	107	10427	1.75994	0.75498	0.103612	0.0997416
KEGG_PATHWAY	ccad04978:Mineral absorption	22	0.522689	0.00416831	SLC34A3, LOC122426323, ATP1A3, SLC30A1, ATP2B2, SLC5A1, SLC8A1, ATOX1, SLC8A2, SLC8A3, TRPV6, LOC122420102, LOC122442443, LOC122438238, LOC122420100, LOC122435422, LOC122427539, LOC122447809, LOC122438195, SLC26A3, TRPM6, LOC122443958	1495	81	10427	1.89433	0.765295	0.103612	0.0997416
KEGG_PATHWAY	ccad03440:Homologous recombination	14	0.332621	0.0045349	MUS81, TOP3B, XRCC2, RAD51B, SEM1, RAD52, RAD51, POLD1, RPA3, RPA4, RAD54L, SSBP1, TOPBP1, LOC122423602	1495	42	10427	2.32486	0.793445	0.10521	0.101279
KEGG_PATHWAY	ccad05171:Coronavirus disease - COVID-19	106	2.51841	0.00523037	LOC122425560, RPL30, LOC122424993, TNF, RPL6, RPS15, RPS19, C3AR1, LOC122425446, LOC122455253, RPL35, LOC122455254, RPL38, LOC122433340, LOC122422854, RPL39, PRKCG, LOC122424583, LOC122426369, LOC122430223, RPS6, RPL22, PRKCA, LOC122422848, ACE2, LOC122437256, RPL27, LOC122421117, LOC122422844, CFB, LOC122439670, LOC122430898, LOC122430937, LOC122433809, PIK3R3, LOC122420295, LOC122420690, LOC122…	1495	579	10427	1.27687	0.837926	0.110147	0.106033
GOTERM_BP_DIRECT	GO:0000278~mitotic cell cycle	20	0.475172	0.00533709	CENPT, WDHD1, CENPW, TUBAL3, LOC122430099, TUBD1, TUBG2, SNX33, TUBB4B, LOC122427692, LOC122425818, CENPE, PPP2CB, WEE1, WEE2, SPATA17, LOC122430098, LOC122422249, POLE, TUBA8	2526	66	15999	1.91931	0.999917	1	1
KEGG_PATHWAY	ccad04014:Ras signaling pathway	51	1.21169	0.00538076	LOC122446062, RASGRF2, ELK1, IKBKB, SYNGAP1, LOC122420753, KDR, RAC3, IKBKG, HRAS, PRKCG, RASA4B, RRAS2, PRKCA, RALGAPB, SOS1, RIN1, RAPGEF5, PLA1A, PLA2G1B, PDGFA, PIK3R3, RASAL1, RASAL2, EGFR, PLD2, PAK1, GNG3, GRIN2A, RRAS, PDGFD, PAK6, GNG8, FGF23, RALGDS, PAK5, PAK4, ANGPT4, VEGFB, GNG11, VEGFA, GNG13, MAPK10, AFDN, KITLG, FGF19, FGF18, GNB3, LOC122440910, RGL1, FGFR1	1495	245	10427	1.45185	0.84621	0.110147	0.106033
GOTERM_BP_DIRECT	GO:0001666~response to hypoxia	7	0.16631	0.00599741	TH, MMP2, VEGFB, PLEKHN1, LIMD1, AJUBA, VEGFA	2526	12	15999	3.69468	0.999974	1	1
GOTERM_CC_DIRECT	GO:0005778~peroxisomal membrane	11	0.261345	0.00648995	FIS1, PEX5L, SLC25A17, PEX11A, PEX5, PXMP4, PEX10, PEX2, PEX11G, PEX12, PEX26	2355	28	15361	2.5625	0.972694	1	1
GOTERM_BP_DIRECT	GO:0007275~multicellular organism development	36	0.85531	0.0070866	RET, NOTCH3, GREB1L, MST1R, CDH8, FSTL4, EGFR, WNT6, SPRED2, SPRED1, CDH3, ERBB3, KDR, OTX1, AMELX, JAG2, WNT10B, WNT10A, WNT5B, WNT3A, RYK, TIE1, WNT7B, FST, TNK1, WNT16, VANGL1, DKK4, VANGL2, AXL, TYRO3, SPRY2, ROR1, CDHR5, ROR2, FGFR1	2526	147	15999	1.55112	0.999996	1	1
GOTERM_BP_DIRECT	GO:1904491~protein localization to ciliary transition zone	5	0.118793	0.0070991	TCTN2, TCTN1, TMEM107, NPHP4, CC2D2A	2526	6	15999	5.27811	0.999996	1	1
GOTERM_MF_DIRECT	GO:0000149~SNARE binding	15	0.356379	0.00755361	EXOC3L2, SNAPIN, SEC24A, ANKRD27, STX17, STX19, STX8, LOC122421264, SYT7, SYT12, VPS50, LOC122421653, TSNARE1, STX2, LOC122433182	2595	45	16442	2.11201	0.999741	1	1
GOTERM_BP_DIRECT	GO:0006261~DNA-templated DNA replication	7	0.16631	0.00966535	WDHD1, POLQ, RFC3, RFC4, POLN, POLE2, POLD1	2526	13	15999	3.41047	1	1	1
KEGG_PATHWAY	ccad04390:Hippo signaling pathway	37	0.879069	0.010186	YAP1, LIMD1, PRKCZ, STK3, BBC3, WNT6, PPP2CB, PARD6A, CCND1, PPP2R1B, YWHAQ, TP53BP2, LOC122420638, TEAD1, LOC122453372, YWHAH, TEAD3, WNT10B, TCF7L2, WNT10A, TCF7L1, PRKCI, SMAD4, TGFB2, WNT5B, WNT3A, FZD7, WNT7B, SCRIB, WNT16, BMP6, BMP4, DLG2, PPP2R2B, PARD3, LOC122453084, AJUBA	1495	171	10427	1.50912	0.971352	0.185566	0.178634
KEGG_PATHWAY	ccad00760:Nicotinate and nicotinamide metabolism	13	0.308862	0.0101906	LOC122431037, QPRT, SIRT4, NMNAT2, LOC122431219, NT5DC4, NMRK2, NAPRT, LOC122426516, NT5M, LOC122426514, NUDT13, NUDT12	1495	41	10427	2.21145	0.971398	0.185566	0.178634
KEGG_PATHWAY	ccad01240:Biosynthesis of cofactors	35	0.831551	0.0106647	PANK2, ALAS1, PANK3, HAAO, MPI, QPRT, AK5, PTS, AK8, GMPPB, RDH12, TDO2, PPCS, FLAD1, NAPRT, PNPO, VKORC1, NQO1, PMM1, MMAB, LOC122431037, UROS, AKR1A1, NME4, NMNAT2, COASY, DHRS3, NME1, LOC122431219, UGDH, COQ2, PHOSPHO2, NME7, MTHFD2L, ALPL	1495	160	10427	1.52569	0.975779	0.185566	0.178634
GOTERM_MF_DIRECT	GO:0003924~GTPase activity	66	1.56807	0.0107725	RAB3B, RAB3C, RAB3A, RASL11B, RND2, RND3, ARHGAP35, RAB22A, RND1, RAB43, RNF112, RAC3, LOC122427624, HRAS, EIF5B, RRAS2, RHOD, DNM1, RAB33B, TUFM, RAP2B, RRAGB, RAB37, RAB34, RHOJ, LOC122432562, RHOU, RAB7B, RHOQ, ARL9, GNAZ, LOC122434219, LOC122434658, RRAD, LOC122430099, RHOBTB3, ARL2, AGAP1, RHOBTB1, NUGGC, GNA15, RAB40B, RASD1, RRAS, ARL13A, RAB26, GNA11, LOC122430098, LOC122432032, RAB6B, RE…	2595	313	16442	1.33603	0.999992	1	1
GOTERM_CC_DIRECT	GO:0005874~microtubule	17	0.403896	0.0117379	TUBAL3, LOC122430099, MX1, TUBD1, TUBG2, TUBB4B, LOC122427692, DNM1, TPX2, CENPE, TPPP3, TPPP2, DCDC2B, NUSAP1, LOC122430098, LOC122422249, TUBA8	2355	58	15361	1.91183	0.99854	1	1
GOTERM_CC_DIRECT	GO:0031012~extracellular matrix	24	0.570207	0.0118709	LINGO1, SPON1, ECM2, MMP2, PAPLN, DMP1, CLEC14A, MUC5B, GP5, MUC5AC, MMP14, ADAMTS3, ADAMTSL4, ADAMTS18, ADAMTSL3, CCN6, ADAMTS17, TIMP3, CD248, TIMP1, ZP3, GPLD1, TIMP4, MUC6	2355	93	15361	1.68328	0.998645	1	1
KEGG_PATHWAY	ccad05165:Human papillomavirus infection	68	1.61559	0.0123983	LOC122428355, LOC122446062, LOC122424593, LOC122429603, MAML2, ITGA2B, TCIRG1, TNF, IKBKB, CCND1, PPP2R1B, CREB3L3, CREB3L4, TNN, EP300, IKBKG, IKBKE, HRAS, ATP6V0B, LOC122424462, PRKCI, ATP6V1G2, WNT5B, SCRIB, TUBG2, WNT16, CREB3, IRF3, PARD3, COL4A6, ITGA6, SOS1, LOC122454175, IRF9, NOTCH3, TNXB, LAMA2, PIK3R3, PRKCZ, THBS1, THBS4, EGFR, THBS3, WNT6, PPP2CB, RELN, PARD6A, HES1, HES4, WNT10B, TC…	1495	359	10427	1.32109	0.986821	0.205458	0.197783
GOTERM_CC_DIRECT	GO:0036038~MKS complex	5	0.118793	0.0130495	TMEM67, TCTN2, TCTN1, TMEM107, B9D1	2355	7	15361	4.65908	0.9993	1	1
GOTERM_MF_DIRECT	GO:1990050~phosphatidic acid transfer activity	5	0.118793	0.0144835	PRELID2, PRELID1, LOC122424598, PRELID3A, PRELID3B	2595	7	16442	4.52574	1	1	1
GOTERM_BP_DIRECT	GO:0016558~protein import into peroxisome matrix	5	0.118793	0.0145012	PEX7, PEX10, PEX2, PEX12, PEX26	2526	7	15999	4.52409	1	1	1
GOTERM_BP_DIRECT	GO:0015914~phospholipid transport	7	0.16631	0.0146865	PRELID2, PRELID1, PITPNM1, LOC122424598, PITPNC1, PRELID3A, PRELID3B	2526	14	15999	3.16686	1	1	1
KEGG_PATHWAY	ccad03460:Fanconi anemia pathway	15	0.356379	0.0148649	MUS81, TOP3B, WDR48, POLN, RMI1, REV1, FANCB, RAD51, FANCD2, RPA3, UBE2T, RPA4, HES1, POLK, LOC122435272	1495	53	10427	1.97394	0.994466	0.227854	0.219342
KEGG_PATHWAY	ccad04530:Tight junction	40	0.950344	0.0150593	LOC122454885, TUBAL3, ROCK2, PRKAG2, MYL6B, F11R, PRKCZ, LOC122432092, PPP2CB, CLDN20, PARD6A, CCND1, PPP2R1B, MARVELD2, MICALL2, MAP2K7, SYNPO, MPDZ, PRKCI, JUN, LOC122454534, SCRIB, LOC122427692, TJAP1, LOC122449484, MAPK10, AFDN, OCLN, CLDN4, DLG2, CTTN, PPP2R2B, PARD3, RAB13, LOC122425799, RAPGEF2, LOC122422249, MYL9, TJP3, TUBA8	1495	193	10427	1.44551	0.994832	0.227854	0.219342
GOTERM_BP_DIRECT	GO:0033674~positive regulation of kinase activity	14	0.332621	0.0155526	RET, VAC14, RYK, TIE1, TNK1, MST1R, EGFR, ERBB3, AXL, KDR, TYRO3, ROR1, ROR2, FGFR1	2526	44	15999	2.01528	1	1	1
GOTERM_BP_DIRECT	GO:0060070~canonical Wnt signaling pathway	15	0.356379	0.0166249	WNT10B, TCF7L2, WNT10A, TCF7L1, WNT5B, WNT3A, FZD7, WNT7B, WNT16, SFRP4, WNT6, PORCN, SFRP2, FRZB, PLPP3	2526	49	15999	1.9389	1	1	1
KEGG_PATHWAY	ccad04928:Parathyroid hormone synthesis, secretion and action	27	0.641483	0.0167306	ATF2, ADCY4, WNK4, ARRB2, EGFR, PLD2, RXRB, CREB3L3, CREB3L4, GNA11, TNFSF11, SOST, FGF23, PRKCG, SLC34A3, LOC122427212, PDE4D, PDE4C, PRKCA, LOC122454835, NR4A2, CREB3, MMP14, SGK1, PLCB1, PLCB2, FGFR1	1495	119	10427	1.58247	0.997133	0.237259	0.228396
GOTERM_MF_DIRECT	GO:0005525~GTP binding	72	1.71062	0.0175386	RAB3B, RAB3C, RAB3A, RASL11B, RND2, RND3, ARHGAP35, RAB22A, RND1, GMPPB, RAB43, RNF112, RAC3, LOC122427624, HRAS, EIF5B, RRAS2, TUBG2, RHOD, LOC122427692, DNM1, RAB33B, TUFM, RAP2B, RRAGB, RAB37, RAB34, RHOJ, LOC122432562, RHOU, LOC122422249, RAB7B, RHOQ, ARL9, GNAZ, LOC122434219, LOC122434658, TUBAL3, RRAD, LOC122430099, RHOBTB3, TUBD1, ARL2, AGAP1, SRL, RHOBTB1, RAB40B, RASD1, RRAS, ARL13A, RAB…	2595	354	16442	1.28868	1	1	1
KEGG_PATHWAY	ccad05132:Salmonella infection	57	1.35424	0.0183755	LOC122454885, LOC122446062, TNF, PIK3C2B, IKBKB, KIF5A, TNFSF10, CASP1, IKBKG, HRAS, VPS18, LOC122426721, VPS33A, LOC122454534, LOC122427692, RHOJ, LOC122425799, LOC122432089, PFN4, LOC122421313, LOC122422249, TLR5, RAB7B, MYL9, PFN3, PFN2, TLR2, DCTN6, LOC122434658, TUBAL3, ROCK2, LOC122430099, DCTN3, SNX33, KLC1, STX10, CYTH3, KLC3, PAK1, KLC2, RRAS, MYL10, LOC122430098, MAP2K7, WASF3, GSDMD, T…	1495	298	10427	1.33406	0.998397	0.237259	0.228396
GOTERM_BP_DIRECT	GO:0071277~cellular response to calcium ion	10	0.237586	0.0188667	CPNE9, RASA4B, SYT12, CPNE5, CPNE7, LOC122421264, RASAL1, LOC122421653, CPNE2, SYT7	2526	27	15999	2.34583	1	1	1
KEGG_PATHWAY	ccad04660:T cell receptor signaling pathway	28	0.665241	0.0191128	LOC122446062, PIK3R3, TNF, IKBKB, PPP2CB, PAK1, PPP3CB, PPP2R1B, PAK6, IKBKG, MAP2K7, HRAS, PAK5, PAK4, VAV3, JUN, PDPK1, PPP2R3A, MAPK12, VAV2, MAPK10, MAPK11, IFNG, PPP2R2B, LOC122440910, PDCD1, SOS1, LOC122454175	1495	126	10427	1.54991	0.998765	0.237259	0.228396
KEGG_PATHWAY	ccad04916:Melanogenesis	25	0.593965	0.0191451	LOC122446062, ADCY4, WNT6, LOC122420753, CREB3L3, CREB3L4, EP300, HRAS, PRKCG, WNT10B, TCF7L2, WNT10A, TCF7L1, WNT5B, WNT3A, FZD7, WNT7B, PRKCA, WNT16, POMC, CREB3, KITLG, LOC122440910, PLCB1, PLCB2	1495	109	10427	1.59967	0.998779	0.237259	0.228396
KEGG_PATHWAY	ccad04012:ErbB signaling pathway	21	0.498931	0.0197716	PRKCG, LOC122446062, JUN, PIK3R3, PRKCA, NRG2, ELK1, EGFR, BTC, MAPK10, PAK1, RPS6KB1, ERBB3, NRG4, PAK6, LOC122440910, MAP2K7, SOS1, HRAS, PAK5, PAK4	1495	87	10427	1.68352	0.999021	0.237259	0.228396
KEGG_PATHWAY	ccad04721:Synaptic vesicle cycle	21	0.498931	0.0197716	UNC13B, LOC122428355, ATP6V0B, RAB3A, UNC13A, ATP6V1G2, LOC122427754, STXBP1, SLC1A1, CLTB, CACNA1A, TCIRG1, SLC1A7, DNM1, SLC6A3, CPLX4, CPLX3, SLC6A4, SLC17A7, SLC17A8, STX2	1495	87	10427	1.68352	0.999021	0.237259	0.228396
GOTERM_MF_DIRECT	GO:0045499~chemorepellent activity	9	0.213828	0.0202088	SEMA5B, SEMA6A, SEMA3C, SEMA4D, NRG4, SEMA3B, SEMA3G, SEMA4F, SEMA3F	2595	23	16442	2.47932	1	1	1
GOTERM_MF_DIRECT	GO:0005164~tumor necrosis factor receptor binding	9	0.213828	0.0202088	TNFSF14, TNFSF4, TRAF5, LTA, TNFSF10, TNFSF11, TRIM37, LOC122445907, TNF	2595	23	16442	2.47932	1	1	1
GOTERM_BP_DIRECT	GO:0000724~double-strand break repair via homologous recombination	16	0.380138	0.0205956	SWSAP1, WDR48, RMI1, XRCC2, SMC5, SPIDR, RAD51B, SEM1, RAD52, WRN, RAD51, SFR1, RFWD3, RPA3, RPA4, LOC122423602	2526	55	15999	1.84254	1	1	1
GOTERM_MF_DIRECT	GO:0008028~monocarboxylic acid transmembrane transporter activity	7	0.16631	0.0212331	SLC16A7, SLC16A11, SLC16A9, SLC16A2, SLC16A4, SLC16A5, SLC16A13	2595	15	16442	2.95681	1	1	1
GOTERM_BP_DIRECT	GO:0006904~vesicle docking involved in exocytosis	7	0.16631	0.0212664	RAB3B, RAB43, RAB3C, VPS18, RAB3A, STXBP1, RAB13	2526	15	15999	2.95574	1	1	1
GOTERM_BP_DIRECT	GO:0055085~transmembrane transport	60	1.42552	0.0232427	SLC23A3, SLC35B3, SLC35F2, SLC23A1, SLC7A14, SLC4A4, SLC4A5, SLC2A8, LOC122420191, SLC22A13, SLC22A14, SLC22A16, SLC22A17, MFSD3, SLC25A41, SLC16A7, SLC25A43, SLC16A9, SLC25A45, SLC16A2, SLC25A47, SLC16A4, SLC16A5, LOC122426440, SLC2A10, SLC2A12, LOC122420187, LOC122420183, MFSD10, SLC22A23, SLC7A4, SLC25A17, SLCO2A1, LOC122421237, LOC122421239, SLC45A2, SLC26A1, CATSPER2, SLC22A2, SLC5A11, SLCO5…	2526	291	15999	1.30592	1	1	1
KEGG_PATHWAY	ccad03050:Proteasome	15	0.356379	0.0238075	PSMD11, SEM1, PSMB6, PSMD8, PSMD9, PSMA3, PSMB5, PSMC6, LOC122419603, IFNG, PSMC3, PSMC4, PSME3, PSME4, PSMD1	1495	56	10427	1.86819	0.999766	0.276167	0.26585
GOTERM_MF_DIRECT	GO:0005524~ATP binding	207	4.91803	0.0248388	PANK2, PANK3, TP53RK, PARS2, ULK4, TESK2, SMC5, SMC4, MYLK, RPS6KA5, CHEK1, DHX58, KDR, KIF21A, SEPHS2, EPHB4, PRKCG, EPHA4, PRKCI, LOC122431037, DAPK2, CSNK2A2, PRKCA, PASK, PRKD3, KATNAL2, TYRO3, LOC122454293, TRIB3, TARS2, SIK1, ALPK2, WNK4, ABCB9, MST1R, PRKCZ, TTBK1, NUAK1, LOC122421388, RIMKLA, TRPM6, ZRANB3, CDK17, MYH7B, SRMS, YES1, DMPK, DNAH17, XRCC2, SMARCA5, DCLK3, SMARCA1, SMARCA4, L…	2595	1152	16442	1.13851	1	1	1
GOTERM_MF_DIRECT	GO:0035091~phosphatidylinositol binding	19	0.451414	0.024839	SNX10, SNX32, SNX33, PITPNC1, PIK3C2B, PLD2, PARD3B, NISCH, TOM1L1, SH3YL1, SNX4, SNX16, PITPNM1, SH3PXD2A, PARD3, SNX15, SGK1, SNX7, LOC122454483	2595	71	16442	1.69556	1	1	1
GOTERM_MF_DIRECT	GO:0046872~metal ion binding	43	1.02162	0.0252379	RBM27, RBM26, LOC122453953, ZC3H4, ZFYVE9, ZC3H3, PRR3, LENG9, ZC3H8, ZC3H6, RNF135, RNF112, FGD5, TDO2, PITRM1, NUP42, ZC3H12B, ACP7, CARNS1, RIMKLA, BSN, RNF175, UNKL, NUDT13, NUDT12, TOE1, ZC3H10, LOC122429673, LOC122430561, ZFYVE21, ATOX1, SH3RF3, PC, PCCA, PITPNM1, LOC122420102, LOC122420100, RUFY2, LOC122435510, TDRD12, WDFY2, RNF121, OBI1	2595	198	16442	1.37601	1	1	1
GOTERM_MF_DIRECT	GO:0003810~protein-glutamine gamma-glutamyltransferase activity	5	0.118793	0.025383	TGM1, TGM7, TGM5, TGM3, TGM2	2595	8	16442	3.96002	1	1	1
GOTERM_BP_DIRECT	GO:0018149~peptide cross-linking	5	0.118793	0.0254129	TGM1, TGM7, TGM5, TGM3, TGM2	2526	8	15999	3.95858	1	1	1
KEGG_PATHWAY	ccad05225:Hepatocellular carcinoma	37	0.879069	0.0256936	LOC122446062, SMARCD1, SMARCD3, SMARCB1, PIK3R3, LOC122446364, LOC122429584, ELK1, EGFR, WNT6, FRAT2, CCND1, DPF1, POLK, HRAS, PRKCG, SMARCE1, WNT10B, TCF7L2, NQO1, WNT10A, TCF7L1, SMAD4, TGFB2, WNT5B, WNT3A, FZD7, WNT7B, PRKCA, WNT16, SMARCA4, GADD45G, CDK6, RPS6KB1, LOC122429517, LOC122440910, SOS1	1495	182	10427	1.41791	0.999881	0.288431	0.277657
KEGG_PATHWAY	ccad05224:Breast cancer	32	0.760276	0.0269569	NOTCH3, LOC122446062, PIK3R3, EGFR, WNT6, FRAT2, CCND1, TNFSF11, HES1, POLK, FGF23, HRAS, JAG2, WNT10B, TCF7L2, WNT10A, TCF7L1, JUN, WNT5B, WNT3A, FZD7, WNT7B, WNT16, GADD45G, CDK6, RPS6KB1, FGF19, FGF18, LOC122440910, PGR, SOS1, FGFR1	1495	153	10427	1.45874	0.999924	0.293156	0.282205
GOTERM_BP_DIRECT	GO:0043161~proteasome-mediated ubiquitin-dependent protein catabolic process	23	0.546448	0.0271731	RNF34, UBE2B, UBXN2B, UBXN2A, RHOBTB3, KLHL22, UBE2G1, TNFAIP1, KCTD5, SPSB3, PSMD8, NSFL1C, SPSB2, PSMC3, PSMC4, TRIM2, TRIM3, KCTD13, SPOPL, UBXN7, ERCC8, PSMD1, DCAF11	2526	92	15999	1.58343	1	1	1
GOTERM_MF_DIRECT	GO:0001530~lipopolysaccharide binding	8	0.190069	0.0282329	LOC122424251, LOC122424261, LOC122424253, LOC122424252, ZRANB2, LOC122424256, BPI, LOC122448352	2595	20	16442	2.53441	1	1	1
GOTERM_MF_DIRECT	GO:0030215~semaphorin receptor binding	8	0.190069	0.0282329	SEMA5B, SEMA6A, SEMA3C, SEMA4D, SEMA3B, SEMA3G, SEMA4F, SEMA3F	2595	20	16442	2.53441	1	1	1
GOTERM_BP_DIRECT	GO:0071526~semaphorin-plexin signaling pathway	8	0.190069	0.0282805	SEMA5B, SEMA6A, SEMA3C, SEMA4D, SEMA3B, SEMA3G, SEMA4F, SEMA3F	2526	20	15999	2.53349	1	1	1
GOTERM_BP_DIRECT	GO:0048843~negative regulation of axon extension involved in axon guidance	8	0.190069	0.0282805	SEMA5B, SEMA6A, SEMA3C, SEMA4D, SEMA3B, SEMA3G, SEMA4F, SEMA3F	2526	20	15999	2.53349	1	1	1
GOTERM_MF_DIRECT	GO:0022857~transmembrane transporter activity	19	0.451414	0.0283863	SLC23A3, LOC122431415, SLC35F2, SLC2A10, SLC23A1, SLC2A12, SLC2A8, MFSD10, SLC22A23, SLC22A13, SLC22A14, SV2C, SLC17A9, SLC22A17, MFSD3, SLC25A45, SLC22A31, SLC22A7, SLC25A47	2595	72	16442	1.67201	1	1	1
KEGG_PATHWAY	ccad04810:Regulation of actin cytoskeleton	49	1.16417	0.0284332	LOC122454885, LOC122446062, ITGA2B, ARHGAP35, LOC122431405, MYLK3, MYLK4, MYLK, CFL2, BDKRB2, RAC3, HRAS, VAV3, LOC122454534, RRAS2, F2, VAV2, ITGAD, LOC122425799, PFN4, ITGA6, SOS1, PPP1R12B, MYL9, PFN3, PFN2, ROCK2, PDGFA, PIK3R3, EGFR, PAK1, RRAS, PDGFD, C9, MYL10, PAK6, FGF23, PAK5, PAK4, LIMK1, FN1, BAIAP2, LOC122449484, SSH1, FGF19, FGF18, LOC122440910, BCAR1, FGFR1	1495	256	10427	1.33498	0.999955	0.299841	0.28864
GOTERM_BP_DIRECT	GO:0036065~fucosylation	6	0.142552	0.029267	FUT7, FUT10, FUOM, FUT2, LOC122454000, LOC122420846	2526	12	15999	3.16686	1	1	1
KEGG_PATHWAY	ccad05231:Choline metabolism in cancer	23	0.546448	0.0300361	PRKCG, DGKG, LOC122446062, JUN, CHKA, PDPK1, SLC22A2, PDGFA, PIK3R3, PRKCA, EGFR, PLD2, MAPK10, RPS6KB1, DGKQ, PDGFD, RAC3, LOC122440910, SOS1, PLPP3, RALGDS, HRAS, WASF3	1495	102	10427	1.5727	0.999975	0.307428	0.295944
GOTERM_MF_DIRECT	GO:0004668~protein-arginine deiminase activity	4	0.0950344	0.0305401	PADI6, PADI3, PADI2, PADI1	2595	5	16442	5.06882	1	1	1
GOTERM_MF_DIRECT	GO:0001730~2'-5'-oligoadenylate synthetase activity	4	0.0950344	0.0305401	LOC122422848, LOC122422854, LOC122422844, LOC122422833	2595	5	16442	5.06882	1	1	1
GOTERM_BP_DIRECT	GO:0042148~DNA strand invasion	4	0.0950344	0.030569	RAD51, XRCC2, DMC1, LOC122423602	2526	5	15999	5.06698	1	1	1
GOTERM_BP_DIRECT	GO:0031119~tRNA pseudouridine synthesis	4	0.0950344	0.030569	PUS3, PUS10, PUS1, PUSL1	2526	5	15999	5.06698	1	1	1
GOTERM_MF_DIRECT	GO:0005515~protein binding	398	9.45593	0.0324922	RNH1, LOC122423784, DCAF8, WDR86, WDR89, LOC122438914, SMC4, WDR87, MYLK, PREX2, PSMD9, UBASH3B, WDR90, LOC122422217, SAMD13, SAMD11, ANKS1B, ADGB, WDHD1, PRKCI, UNC5B, ARMC7, WDR72, SCRIB, UNC5D, PARD3, TYRO3, LOC122421117, AGAP1, WDR64, SLCO5A1, PRDM11, PRKCZ, C3, WDR70, LOC122447855, C9, RRS1, LOC122421388, PHC2, GP5, WDR54, EHD2, GP9, EHD3, GIPC1, LOC122436984, LOC122455243, ZBTB8B, LRRC36, S…	2595	2320	16442	1.08696	1	1	1
KEGG_PATHWAY	ccad04520:Adherens junction	23	0.546448	0.0332093	LOC122454885, TCF7L2, SMAD4, TCF7L1, YES1, ROCK2, LOC122454534, CSNK2A2, CTNND1, BAIAP2, EGFR, AFDN, LOC122439435, PARD3, SNAI1, EP300, MYL10, RAC3, NECTIN4, ACP1, MYL9, WASF3, FGFR1	1495	103	10427	1.55743	0.999992	0.330195	0.31786
KEGG_PATHWAY	ccad04512:ECM-receptor interaction	21	0.498931	0.0346155	LOC122424462, TNXB, LOC122424593, LAMA2, GP1BB, ITGA2B, FN1, DMP1, GP1BA, NPNT, THBS1, GP5, THBS4, THBS3, GP9, SV2C, RELN, TNN, COL4A6, ITGA6, AGRN	1495	92	10427	1.59202	0.999995	0.334616	0.322116
GOTERM_CC_DIRECT	GO:0001518~voltage-gated sodium channel complex	7	0.16631	0.0349514	SCN11A, SCN8A, SCN5A, SCN3B, SCN1B, CACNA1H, SCN2B	2355	17	15361	2.68582	1	1	1
KEGG_PATHWAY	ccad04933:AGE-RAGE signaling pathway in diabetic complications	23	0.546448	0.0366268	JUN, SMAD4, TGFB2, MMP2, VEGFB, FN1, PIK3R3, PRKCA, PRKCZ, SELE, TNF, MAPK12, VEGFA, MAPK10, MAPK11, CCND1, COL4A6, PLCD3, PLCB1, PLCD4, HRAS, PLCB2, NOX1	1495	104	10427	1.54246	0.999998	0.341023	0.328284
GOTERM_BP_DIRECT	GO:0050919~negative chemotaxis	8	0.190069	0.0367992	SEMA6A, SEMA3C, SEMA4D, SEMA3B, SLIT1, SEMA3G, SEMA4F, SEMA3F	2526	21	15999	2.41285	1	1	1
KEGG_PATHWAY	ccad03420:Nucleotide excision repair	16	0.380138	0.0387748	POLR2M, RFC3, LOC122454266, RFC4, POLE2, POLD1, RPA3, UVSSA, ERCC2, RPA4, POLR2F, ERCC8, POLR2H, POLE, POLR2K, POLR2L	1495	65	10427	1.71682	0.999999	0.341023	0.328284
GOTERM_MF_DIRECT	GO:1901981~phosphatidylinositol phosphate binding	7	0.16631	0.0397096	DENND1C, SNX24, SNX21, SNX22, PLEKHN1, PHLDA2, PHLDA1	2595	17	16442	2.60895	1	1	1
GOTERM_MF_DIRECT	GO:0008266~poly(U) RNA binding	5	0.118793	0.0400737	LOC122425781, PABPC4, PABPC1L, RBMS2, LOC122435903	2595	9	16442	3.52002	1	1	1
GOTERM_MF_DIRECT	GO:0050840~extracellular matrix binding	5	0.118793	0.0400737	SPARC, SMOC1, DMP1, CLEC14A, CD248	2595	9	16442	3.52002	1	1	1
KEGG_PATHWAY	ccad05206:MicroRNAs in cancer	34	0.807793	0.0401323	LOC122430610, NOTCH3, LOC122446062, HDAC5, TNXB, GLS2, PDGFA, PIK3R3, THBS1, EGFR, RPTOR, IKBKB, RPS6KA5, CCND1, ERBB3, TNN, EP300, TIMP3, HRAS, TP63, PAK4, PRKCG, TGFB2, WNT3A, LOC122430609, PRKCA, VEGFA, CDK6, ZEB1, FSCN1, SPRY2, LOC122440910, ZFPM2, SOS1	1495	170	10427	1.39492	0.999999	0.341023	0.328284
KEGG_PATHWAY	ccad05020:Prion disease	62	1.47303	0.0404175	LOC122430038, RYR1, ATF2, NDUFA13, LOC122451456, NDUFA10, TNF, RYR3, LOC122432978, PSMD8, PSMD9, LOC122427709, PPP3CB, CREB3L3, CREB3L4, KIF5A, LOC122425524, PSMD1, CSNK2A2, SDHC, LOC122434949, LOC122427692, CREB3, PSMA3, NDUFS7, DDIT3, PPIF, LOC122434662, LOC122422249, C1QB, LOC122427289, NDUFB9, NDUFB7, PSMD11, TUBAL3, LOC122430099, NDUFB1, PIK3R3, CACNA1C, KLC1, PSMB6, STIP1, KLC3, GRIN2A, PSM…	1495	343	10427	1.26071	0.999999	0.341023	0.328284
GOTERM_MF_DIRECT	GO:0004550~nucleoside diphosphate kinase activity	6	0.142552	0.0414636	NME7, NME9, NME4, AK5, AK8, NME1	2595	13	16442	2.92432	1	1	1
GOTERM_MF_DIRECT	GO:0017080~sodium channel regulator activity	6	0.142552	0.0414636	FXYD3, LOC122446555, RANGRF, SCN3B, SCN1B, SCN2B	2595	13	16442	2.92432	1	1	1
GOTERM_BP_DIRECT	GO:0071577~zinc ion transmembrane transport	6	0.142552	0.041518	SLC30A2, SLC30A1, SLC39A13, SLC39A7, SLC39A1, SLC39A3	2526	13	15999	2.92326	1	1	1
GOTERM_BP_DIRECT	GO:0015718~monocarboxylic acid transport	6	0.142552	0.041518	SLC16A7, SLC16A11, SLC16A9, SLC16A4, SLC16A5, SLC16A13	2526	13	15999	2.92326	1	1	1
KEGG_PATHWAY	ccad05146:Amoebiasis	25	0.593965	0.0416417	LOC122428376, LOC122424593, SERPINB13, LAMA2, PIK3R3, TNF, LOC122425829, GNA15, GNA11, C9, PRKCG, LOC122424462, ARG2, TGFB2, LOC122425696, NOS2, FN1, PRKCA, GNAL, IFNG, COL4A6, RAB7B, PLCB1, PLCB2, TLR2	1495	117	10427	1.4903	1	0.341023	0.328284
GOTERM_MF_DIRECT	GO:0005109~frizzled binding	9	0.213828	0.0417535	RNF43, WNT10B, WNT6, WNT10A, WNT5B, RNF215, WNT3A, WNT7B, WNT16	2595	26	16442	2.19324	1	1	1
KEGG_PATHWAY	ccad04540:Gap junction	21	0.498931	0.042432	PRKCG, LOC122446062, TUBAL3, LOC122430099, ADCY4, PDGFA, PRKCA, TUBB4B, LOC122427692, EGFR, GNA11, PDGFD, LOC122440910, LOC122430098, LOC122422249, PLCB1, SOS1, HRAS, PLCB2, PRKG1, TUBA8	1495	94	10427	1.55815	1	0.341023	0.328284
GOTERM_BP_DIRECT	GO:0043123~positive regulation of canonical NF-kappaB signal transduction	13	0.308862	0.0424326	UNC5CL, TRIM62, PPM1L, TNFRSF19, CARD9, S100B, MTDH, TMEM101, PPM1A, TRAF5, S100A13, ROR1, IKBKG	2526	45	15999	1.82974	1	1	1
GOTERM_BP_DIRECT	GO:0007417~central nervous system development	13	0.308862	0.0424326	MARCKSL1, APLP1, VAX2, LOC122420632, RELN, SMO, ZIC2, TPP1, LOC122420618, LOC122420628, ZNF664, ZNF300, ZNF454	2526	45	15999	1.82974	1	1	1
KEGG_PATHWAY	ccad05418:Fluid shear stress and atherosclerosis	33	0.784034	0.0432294	SDC2, ITGA2B, PDGFA, PIK3R3, LOC122446364, CTSV, LOC122429584, PRKCZ, TNF, IKBKB, LOC122420975, LOC122420753, KDR, RAC3, IKBKG, MAP2K7, PIAS4, NQO1, JUN, LOC122426721, MMP2, SELE, MAPK12, VEGFA, BMP4, MAPK10, MAPK11, IFNG, TRPV4, LOC122429517, LOC122421313, LOC122421116, NOX1	1495	165	10427	1.39492	1	0.341023	0.328284
KEGG_PATHWAY	ccad03030:DNA replication	11	0.261345	0.0440978	RNASEH2B, RFC3, RNASEH1, RFC4, POLE2, POLD1, RPA3, PRIM1, RPA4, SSBP1, POLE	1495	39	10427	1.96719	1	0.341023	0.328284
KEGG_PATHWAY	ccad01250:Biosynthesis of nucleotide sugars	11	0.261345	0.0440978	GMPPB, UGDH, GALE, NAGK, PMM1, TGDS, MPI, UAP1, GFUS, NANS, GALK1	1495	39	10427	1.96719	1	0.341023	0.328284
GOTERM_CC_DIRECT	GO:0035861~site of double-strand break	9	0.213828	0.0442872	LOC122424372, PARP3, RNF169, WDR70, RFWD3, RPA3, RPA4, CHEK1, CGAS	2355	27	15361	2.17424	1	1	1
GOTERM_BP_DIRECT	GO:0035556~intracellular signal transduction	50	1.18793	0.0443687	DGKG, MAST1, MYLK3, MYLK4, PREX2, RPS6KA5, TLK2, SH2D6, VAV3, RASA4B, PDPK1, DAPK2, NRG2, PASK, VAV2, NRG4, DGKQ, SIK1, TSSK2, CILK1, GUCY2C, BRSK2, CCDC68, PKN3, TUFT1, ADCY4, PSEN2, WNK4, RASAL1, STK3, PLD2, PAK1, NUAK1, RAB40B, DCDC2B, PAK6, PLEK2, PAK5, MAPK4, SOCS5, PAK4, POLR2M, DCLK3, MAPK11, SPSB2, PPP1R1A, ASB9, RGS11, PLCD3, PLCD4	2526	245	15999	1.2926	1	1	1
GOTERM_CC_DIRECT	GO:0005737~cytoplasm	375	8.90948	0.0450217	RNH1, PARS2, LOC122423784, STMN2, LOC122433908, DCAF8, TESK2, LOC122438914, GCSH, PSMD9, FRAT2, PPP4R2, PPP2R1B, UBASH3B, LOC122438238, CHEK1, DHX58, RCC1, LOC122434673, HOMER3, SEPHS2, RNF111, LOC122443958, ARRDC5, PABIR1, CCDC78, LOC122431037, ARRDC1, DAPK2, RSAD1, WDR72, PASK, LOC122427692, FRS3, MTURN, SULT2B1, NISCH, SFRP4, NIF3L1, LOC122419603, LOC122439435, PNLDC1, LOC122442751, DDIT3, PSM…	2355	2260	15361	1.08231	1	1	1
GOTERM_MF_DIRECT	GO:0008201~heparin binding	10	0.237586	0.0451489	ECM2, SMOC1, EVA1C, CCN6, COL11A2, APLP1, VEGFB, SLIT1, THBS3, VEGFA	2595	31	16442	2.04388	1	1	1
KEGG_PATHWAY	ccad04146:Peroxisome	20	0.475172	0.0456852	ACOT8, NOS2, LOC122426798, PEX11A, PEX10, PEX2, PEX12, LOC122443181, DDO, PEX26, PEX7, PEX5L, SLC25A17, PEX5, PMVK, PXMP4, ACOX3, PEX11G, NUDT13, NUDT12	1495	89	10427	1.56732	1	0.345486	0.33258
KEGG_PATHWAY	ccad05010:Alzheimer disease	82	1.94821	0.0466605	LOC122430038, LOC122446062, NDUFA13, LOC122451456, NDUFA10, TNF, RYR3, LOC122432978, IKBKB, PSMD8, PSMD9, LOC122427709, PPP3CB, FRAT2, LOC122420753, KIF5A, LOC122425524, SLC39A5, PSMD1, IKBKG, SLC39A7, HRAS, SLC39A1, SLC39A3, WNT5B, CSNK2A2, SDHC, SLC39A13, WNT16, LOC122434949, LOC122427692, DKK4, PSMA3, NDUFS7, DDIT3, PPIF, LOC122434662, LOC122422249, PLCB1, PLCB2, PPID, LOC122427289, NDUFB9, ND…	1495	473	10427	1.20912	1	0.345486	0.33258
GOTERM_BP_DIRECT	GO:0050808~synapse organization	8	0.190069	0.0468458	LOC122432091, LOC122453686, LOC122431620, PTK7, LOC122432100, LOC122431619, PPFIA4, PPFIA3	2526	22	15999	2.30317	1	1	1
GOTERM_MF_DIRECT	GO:0030246~carbohydrate binding	12	0.285103	0.0486815	LGALS4, LGALS3, GANAB, CLEC4D, MAN2A2, CLEC6A, EVA1C, MAN2B1, GALM, PKD1L2, LOC122435800, LGALS9	2595	41	16442	1.85445	1	1	1
KEGG_PATHWAY	ccad04921:Oxytocin signaling pathway	32	0.760276	0.0500743	RYR1, LOC122446062, ROCK2, ADCY4, PRKAG2, MYL6B, CACNA1C, ELK1, RYR3, PIK3R6, MYLK3, EGFR, MYLK4, MYLK, PPP3CB, LOC122420753, CCND1, HRAS, PRKCG, JUN, KCNJ9, KCNJ14, CACNA2D3, CACNA2D2, PRKCA, CACNA2D4, RCAN1, LOC122440910, PLCB1, PPP1R12B, MYL9, PLCB2	1495	161	10427	1.38625	1	0.363039	0.349477
GOTERM_CC_DIRECT	GO:0005736~RNA polymerase I complex	6	0.142552	0.0505684	LOC122424589, POLR2F, POLR1E, POLR2H, POLR2K, POLR2L	2355	14	15361	2.79545	1	1	1
GOTERM_CC_DIRECT	GO:0042383~sarcolemma	8	0.190069	0.0510463	SLC8A3, RYR1, POPDC2, PGM5, ALOX12, RYR3, SLC8A1, SLC8A2	2355	23	15361	2.26877	1	1	1
KEGG_PATHWAY	ccad00350:Tyrosine metabolism	11	0.261345	0.0515359	AOC3, GSTZ1, ALDH3A1, DDC, FAHD1, TH, MAOB, TOMT, ALDH3B1, LOC122426516, LOC122426514	1495	40	10427	1.91801	1	0.36601	0.352337
GOTERM_MF_DIRECT	GO:0003887~DNA-directed DNA polymerase activity	7	0.16631	0.0518516	POLQ, POLN, POLD1, REV1, POLK, POLE, PRIMPOL	2595	18	16442	2.46401	1	1	1
GOTERM_CC_DIRECT	GO:0008021~synaptic vesicle	14	0.332621	0.053452	RAB3B, RAB3C, RAB3A, SNAPIN, STX19, SYPL2, STON2, SYN3, SYN1, SYT7, RAB40B, RAB13, PICK1, STX2	2355	53	15361	1.72298	1	1	1
GOTERM_CC_DIRECT	GO:0097730~non-motile cilium	5	0.118793	0.0534539	TTC8, ARL13A, NPHP4, LOC122430559, WDR35	2355	10	15361	3.26136	1	1	1
GOTERM_BP_DIRECT	GO:0060700~regulation of ribonuclease activity	4	0.0950344	0.0540389	LOC122422848, LOC122422854, LOC122422844, LOC122422833	2526	6	15999	4.22249	1	1	1
GOTERM_BP_DIRECT	GO:0042276~error-prone translesion synthesis	4	0.0950344	0.0540389	POLE2, REV1, POLK, PRIMPOL	2526	6	15999	4.22249	1	1	1
GOTERM_BP_DIRECT	GO:0030335~positive regulation of cell migration	10	0.237586	0.054436	SEMA5B, SEMA3C, SEMA4D, PDGFD, PDPN, SEMA3B, SEMA3G, PDGFA, SEMA4F, SEMA3F	2526	32	15999	1.97929	1	1	1
GOTERM_CC_DIRECT	GO:0048471~perinuclear region of cytoplasm	11	0.261345	0.0557354	SYNJ1, ANP32A, PDE4D, NANOS3, RNF207, PDE2A, LOC122435697, PDE4C, S100A13, PSEN2, LOC122421313	2355	38	15361	1.88816	1	1	1
GOTERM_CC_DIRECT	GO:0005783~endoplasmic reticulum	60	1.42552	0.0557741	PHTF2, TOR2A, MLC1, FAIM2, TMEM97, PIGW, LOC122433949, ZDHHC1, USE1, ZDHHC4, SERP1, SPTLC1, TBC1D30, UBXN8, TMED6, TMED5, CNPY1, P3H4, CDKAL1, ELOVL6, SLC30A1, CNPY2, SHISA2, ELOVL7, P3H3, TLCD3B, LOC122427294, RCN3, RCN1, PNLDC1, LOC122421312, ERP27, KDELR2, KDELR3, SLC27A3, PRKN, UBIAD1, SEZ6, LOC122420096, ATP2C2, LTC4S, LOC122449917, PORCN, ZDHHC19, TMEM247, GPAT3, UGGT2, AOC3, TMEM30B, LOC12…	2355	315	15361	1.24242	1	1	1
GOTERM_MF_DIRECT	GO:0005200~structural constituent of cytoskeleton	11	0.261345	0.0560574	SPTBN4, TUBAL3, LOC122430099, TUBD1, LOC122430098, TUBG2, LOC122422249, TUBB4B, LOC122427692, SPTBN1, TUBA8	2595	37	16442	1.88368	1	1	1
GOTERM_MF_DIRECT	GO:0009982~pseudouridine synthase activity	6	0.142552	0.0563529	PUS3, PUS10, RPUSD1, PUS1, PUS7, PUSL1	2595	14	16442	2.71544	1	1	1
GOTERM_BP_DIRECT	GO:0071230~cellular response to amino acid stimulus	6	0.142552	0.0564243	RPTOR, RRAGB, LAMTOR2, LOC122432032, LAMTOR1, LAMTOR4	2526	14	15999	2.71446	1	1	1
KEGG_PATHWAY	ccad01521:EGFR tyrosine kinase inhibitor resistance	21	0.498931	0.0564468	PRKCG, LOC122425560, LOC122446062, LOC122433037, RPS6, PDGFA, PIK3R3, PRKCA, NRG2, EGFR, VEGFA, RPS6KB1, ERBB3, AXL, PDGFD, KDR, LOC122425446, LOC122440910, LOC122421346, SOS1, HRAS	1495	97	10427	1.50996	1	0.384437	0.370076
KEGG_PATHWAY	ccad05215:Prostate cancer	22	0.522689	0.0571621	LOC122446062, TCF7L2, TCF7L1, PDPK1, PDGFA, PIK3R3, EGFR, IKBKB, CREB3, ZEB1, CCND1, CREB3L3, CREB3L4, PDGFD, CDK2, EP300, LOC122440910, IKBKG, LOC122421313, SOS1, HRAS, FGFR1	1495	103	10427	1.48972	1	0.384437	0.370076
KEGG_PATHWAY	ccad04724:Glutamatergic synapse	24	0.570207	0.0580979	PRKCG, GLS2, SLC1A1, ADCY4, CACNA1A, PRKCA, CACNA1C, SLC1A7, GNG11, PLD2, GNG13, GRM2, GNG3, GRIN2A, PPP3CB, GNG8, GNB3, SLC17A7, HOMER3, DLGAP1, SLC17A8, PLCB1, PLCB2, SHANK1	1495	115	10427	1.45556	1	0.384437	0.370076
KEGG_PATHWAY	ccad04068:FoxO signaling pathway	27	0.641483	0.0585493	LOC122446062, SETD7, PIK3R3, PRKAG2, LOC122432714, EGFR, CCNB3, IKBKB, CCND1, TNFSF10, EP300, HOMER3, SKP2, HRAS, PCK2, SMAD4, TGFB2, PDPK1, MAPK12, GADD45G, MAPK10, MAPK11, G6PC3, CDK2, LOC122440910, SGK1, SOS1	1495	133	10427	1.41589	1	0.384437	0.370076
GOTERM_CC_DIRECT	GO:0005666~RNA polymerase III complex	7	0.16631	0.0585737	POLR3F, POLR3G, POLR2F, POLR2H, LOC122454561, POLR2K, POLR2L	2355	19	15361	2.40311	1	1	1
GOTERM_CC_DIRECT	GO:0031594~neuromuscular junction	7	0.16631	0.0585737	UNC13B, SYNGR1, UNC13A, DLG2, PSEN2, SYNGR3, SYNGR4	2355	19	15361	2.40311	1	1	1
GOTERM_MF_DIRECT	GO:0019902~phosphatase binding	5	0.118793	0.0586367	PPP1R27, SH2D4A, CCDC191, SFI1, TPRN	2595	10	16442	3.16802	1	1	1
GOTERM_MF_DIRECT	GO:0030332~cyclin binding	5	0.118793	0.0586367	CDK6, CDK3, CDK2, INCA1, KLHDC9	2595	10	16442	3.16802	1	1	1
GOTERM_BP_DIRECT	GO:0009435~NAD biosynthetic process	5	0.118793	0.0587007	LOC122431037, NAPRT, QPRT, NMNAT2, LOC122431219	2526	10	15999	3.16686	1	1	1
KEGG_PATHWAY	ccad00330:Arginine and proline metabolism	13	0.308862	0.0604481	ARG2, CKM, MAOB, NOS2, LOC122454546, PYCR1, SAT2, CNDP1, SRM, ALDH4A1, LOC122419623, P4HA3, CARNS1	1495	52	10427	1.74365	1	0.385826	0.371413
KEGG_PATHWAY	ccad05032:Morphine addiction	20	0.475172	0.0609783	PRKCG, PDE1C, KCNJ9, PDE4D, PDE4C, PDE2A, ADCY4, CACNA1A, PRKCA, ARRB2, GNG11, GNG13, GNG3, GABRR1, ADORA1, GNG8, GNB3, LOC122422744, GABRE, PDE8A	1495	92	10427	1.51621	1	0.385826	0.371413
GOTERM_CC_DIRECT	GO:0005886~plasma membrane	234	5.55952	0.0611944	CPNE9, VEZT, LOC122453991, VIPR2, CPNE5, CPNE7, CBLC, MLC1, SLC4A4, AQP3, SLC4A5, MS4A18, TMEM88, SCN11A, MS4A15, PGAP6, C3AR1, HOMER3, CPNE2, EPHB4, CMKLR2, TMEM8B, UNC13B, EPHA4, PAQR7, UNC13A, ENTPD3, SYTL1, TMEM170B, LOC122419726, ACE2, CLDN4, ENTHD1, LOC122421237, LOC122421239, SPTBN4, PTGFR, SPTBN5, RRAD, GIPR, STXBP1, LOC122454948, SLC5A1, A1BG, APCDD1, SLC5A2, SLC6A20, LOC122432714, LOC12…	2355	1388	15361	1.09965	1	1	1
GOTERM_MF_DIRECT	GO:0008270~zinc ion binding	116	2.756	0.0617525	PGLYRP3, ZFAND4, MPI, LOC122454842, ZFAND1, RABGEF1, PEG10, DHX58, EP300, LOC122423425, PIAS4, PRKCG, PIAS3, AGTPBP1, NANOS3, MID1, PIAS2, PIAS1, ASTL, TRIM17, PGR, TRIM15, TRIM16, SRSF7, LOC122454266, ZCCHC9, SUPT4H1, UBR1, LOC122435542, ZMAT5, ZRANB3, PHC2, ZFHX3, ZFHX2, DTNB, ZFR2, NR4A2, ZC3HC1, NR4A3, ZZZ3, ZCCHC4, ZNF512B, ZCCHC12, TRIM72, CPO, ZCCHC10, RNF14, USP33, NR2E1, USP39, ADAMTS5, …	2595	637	16442	1.15381	1	1	1
KEGG_PATHWAY	ccad03020:RNA polymerase	10	0.237586	0.0629471	POLR2M, LOC122424589, POLR3F, POLR3G, POLR2F, POLR1E, POLR2H, LOC122454561, POLR2K, POLR2L	1495	36	10427	1.93738	1	0.38926	0.374718
KEGG_PATHWAY	ccad04010:MAPK signaling pathway	55	1.30672	0.063758	RET, LOC122446062, ATF2, RASGRF2, ARRB2, TNF, ELK1, IKBKB, PPP3CB, RPS6KA5, KDR, RAC3, IKBKG, HRAS, PRKCG, MAP4K1, CACNA2D3, CACNA2D2, RRAS2, PRKCA, CACNA2D4, DUSP8, PPM1A, DDIT3, RAPGEF2, SOS1, PDGFA, CACNA1A, CACNA1C, CACNA1H, EGFR, STK3, PAK1, RRAS, ERBB3, PDGFD, MAP2K7, FGF23, ANGPT4, JUN, TGFB2, PSPN, VEGFB, MAPK12, VEGFA, GADD45G, MAPK10, MAPK11, KITLG, ARTN, FGF19, FGF18, MAP3K10, LOC12244…	1495	308	10427	1.24546	1	0.38926	0.374718
GOTERM_MF_DIRECT	GO:0015171~amino acid transmembrane transporter activity	10	0.237586	0.064658	SLC7A4, LOC122420179, LOC122420187, SLC7A14, SLC38A9, LOC122420183, LOC122421237, LOC122421239, SLC7A3, LOC122420191	2595	33	16442	1.92001	1	1	1
GOTERM_MF_DIRECT	GO:0047555~3',5'-cyclic-GMP phosphodiesterase activity	3	0.0712758	0.0668007	PDE2A, PDE5A, PDE9A	2595	3	16442	6.33603	1	1	1
GOTERM_MF_DIRECT	GO:0035529~NADH pyrophosphatase activity	3	0.0712758	0.0668007	NUDT17, NUDT6, NUDT12	2595	3	16442	6.33603	1	1	1
GOTERM_BP_DIRECT	GO:0000730~DNA recombinase assembly	3	0.0712758	0.0668446	RAD52, RAD51, DMC1	2526	3	15999	6.33373	1	1	1
GOTERM_BP_DIRECT	GO:0010468~regulation of gene expression	17	0.403896	0.068579	TCF19, LOC122454842, LOC122435776, ATXN7L3B, YBX2, LOC122435559, TOB1, LOC122428174, CDK6, PCBP3, CDK3, ZNF407, CDK2, LOC122433112, LOC122423425, IGF2BP2, ANKRA2	2526	69	15999	1.56048	1	1	1
KEGG_PATHWAY	ccad05223:Non-small cell lung cancer	17	0.403896	0.0700096	PRKCG, RET, LOC122446062, PDPK1, PIK3R3, PRKCA, FHIT, EGFR, GADD45G, RXRB, CDK6, CCND1, KIF5A, LOC122440910, POLK, SOS1, HRAS	1495	76	10427	1.5601	1	0.420057	0.404366
GOTERM_MF_DIRECT	GO:0001227~DNA-binding transcription repressor activity, RNA polymerase II-specific	22	0.522689	0.0706446	ZNF584, ZNF891, ZNF175, LOC122433554, ZNF2, ZNF34, LOC122420040, LOC122420480, FOXP4, ZNF619, ZNF81, ZNF629, LOC122420675, ZNF37A, LOC122420279, ZFP62, ZNF667, LOC122420618, ZNF599, ZNF697, ZNF684, ZNF233	2595	96	16442	1.45201	1	1	1
GOTERM_BP_DIRECT	GO:0006096~glycolytic process	8	0.190069	0.0717454	PGAM2, LOC122454293, ALDOC, LOC122431240, BPGM, ENO2, ENO3, ENO4	2526	24	15999	2.11124	1	1	1
GOTERM_CC_DIRECT	GO:0048786~presynaptic active zone	7	0.16631	0.0732291	LOC122432091, LOC122453686, LOC122431620, LOC122432100, LOC122431619, PPFIA4, PPFIA3	2355	20	15361	2.28295	1	1	1
KEGG_PATHWAY	ccad05030:Cocaine addiction	12	0.285103	0.0733894	ATF2, GRM2, CREB3, JUN, GRIN2A, DDC, CREB3L3, TH, MAOB, CREB3L4, FOSB, SLC6A3	1495	48	10427	1.74365	1	0.424917	0.409044
KEGG_PATHWAY	ccad04611:Platelet activation	26	0.617724	0.0734345	LOC122454885, ROCK2, ITGA2B, ADCY4, PIK3R3, PRKCZ, ARHGAP35, PIK3R6, MYLK3, MYLK4, MYLK, PRKG1, PRKCI, FCER1G, GP1BB, LOC122430223, LOC122454534, GP1BA, F2, GP5, MAPK12, MAPK11, GP9, PLCB1, PLCB2, F2RL3	1495	130	10427	1.39492	1	0.424917	0.409044
GOTERM_BP_DIRECT	GO:0008333~endosome to lysosome transport	6	0.142552	0.0740033	VPS18, SNAPIN, SNX16, MGRN1, CLEC16A, RAB7B	2526	15	15999	2.53349	1	1	1
GOTERM_BP_DIRECT	GO:0006865~amino acid transport	9	0.213828	0.0748375	SLC7A4, LOC122420179, LOC122420187, SLC7A14, LOC122420183, LOC122421237, LOC122421239, SLC7A3, LOC122420191	2526	29	15999	1.96564	1	1	1
KEGG_PATHWAY	ccad04664:Fc epsilon RI signaling pathway	16	0.380138	0.0757125	VAV3, LOC122446062, FCER1G, PDPK1, PIK3R3, PRKCA, TNF, MAPK12, VAV2, MAPK10, MAPK11, RAC3, LOC122440910, MAP2K7, SOS1, HRAS	1495	71	10427	1.57174	1	0.424917	0.409044
KEGG_PATHWAY	ccad04657:IL-17 signaling pathway	20	0.475172	0.0794898	JUN, LOC122428376, MUC5B, IL17RC, TNF, MAPK12, MUC5AC, IL17RB, IKBKB, MAPK10, MAPK11, IFNG, TRAF5, FOSB, IL17F, IKBKG, LOC122421313, IKBKE, IL17C, MAPK4	1495	95	10427	1.46833	1	0.424917	0.409044
KEGG_PATHWAY	ccad04934:Cushing syndrome	31	0.736517	0.0809366	ATF2, LOC122446062, ADCY4, CACNA1C, CACNA1H, EGFR, WNT6, RASD1, CCND1, CREB3L3, CREB3L4, GNA11, PDE8A, MEN1, WNT10B, TCF7L2, WNT10A, TCF7L1, WNT5B, WNT3A, FZD7, WNT7B, LOC122449984, WNT16, POMC, CREB3, CDK6, CDK2, LOC122440910, PLCB1, PLCB2	1495	162	10427	1.33464	1	0.424917	0.409044
GOTERM_BP_DIRECT	GO:0043408~regulation of MAPK cascade	5	0.118793	0.0810604	PAK1, PAK6, PAK5, PAK4, STK3	2526	11	15999	2.87897	1	1	1
KEGG_PATHWAY	ccad04929:GnRH secretion	15	0.356379	0.0819313	PRKCG, LOC122446062, KCNJ9, PIK3R3, PRKCA, ARRB2, CACNA1C, CACNA1H, GNA11, GPER1, LOC122440910, KCNN3, PLCB1, HRAS, PLCB2	1495	66	10427	1.58513	1	0.424917	0.409044
KEGG_PATHWAY	ccad00860:Porphyrin metabolism	15	0.356379	0.0819313	ALAS1, MMAB, UROS, LOC122435357, LOC122426323, LOC122445143, LOC122442443, LOC122438238, LOC122435422, BLVRB, LOC122427539, LOC122447809, LOC122438195, BLVRA, LOC122443958	1495	66	10427	1.58513	1	0.424917	0.409044
GOTERM_BP_DIRECT	GO:0007059~chromosome segregation	7	0.16631	0.0823175	CENPT, MIS18A, CENPW, TLK2, OIP5, CENPN, LOC122435778	2526	20	15999	2.21681	1	1	1
GOTERM_BP_DIRECT	GO:0007266~Rho protein signal transduction	7	0.16631	0.0823175	PLEKHG7, ROCK2, PLEKHG5, PDPN, ARHGDIG, EPS8L1, EPS8L2	2526	20	15999	2.21681	1	1	1
GOTERM_MF_DIRECT	GO:0061665~SUMO ligase activity	4	0.0950344	0.0836201	PIAS4, PIAS3, PIAS2, PIAS1	2595	7	16442	3.62059	1	1	1
GOTERM_BP_DIRECT	GO:0033314~mitotic DNA replication checkpoint signaling	4	0.0950344	0.0836921	ORC1, RAD17, TOPBP1, TICRR	2526	7	15999	3.61927	1	1	1
GOTERM_BP_DIRECT	GO:0018344~protein geranylgeranylation	4	0.0950344	0.0836921	FNTA, PGGT1B, RABGGTB, RABGGTA	2526	7	15999	3.61927	1	1	1
GOTERM_BP_DIRECT	GO:0009566~fertilization	4	0.0950344	0.0836921	CATSPER2, SPATA46, LOC122455243, LOC122439273	2526	7	15999	3.61927	1	1	1
KEGG_PATHWAY	ccad00230:Purine metabolism	27	0.641483	0.0840814	GUCY2C, PDE1C, ADCY4, GMPR, AK5, PFAS, FHIT, AK8, NT5DC4, GUK1, NT5M, PDE6A, PDE8A, RRM2, ENTPD3, PDE6H, PDE6G, PDE4D, PDE2A, PDE4C, NME4, APRT, NME1, RRM2B, NME7, PDE5A, PDE9A	1495	138	10427	1.36459	1	0.424917	0.409044
GOTERM_CC_DIRECT	GO:0005788~endoplasmic reticulum lumen	6	0.142552	0.0850823	TOR4A, TOR3A, LOC122426893, TOR2A, SELENOM, SELENOF	2355	16	15361	2.44602	1	1	1
GOTERM_BP_DIRECT	GO:0043065~positive regulation of apoptotic process	13	0.308862	0.0853237	TNFRSF12A, DAPK2, HTRA1, MYLK3, MYLK4, BBC3, TRIM35, LOC122432089, MAP3K10, PLEKHN1, PHLDA2, LOC122432096, PHLDA1	2526	50	15999	1.64677	1	1	1
KEGG_PATHWAY	ccad04912:GnRH signaling pathway	21	0.498931	0.0864868	LOC122446062, JUN, MMP2, ADCY4, PRKCA, CACNA1C, ELK1, MAPK12, EGFR, PLD2, MAPK10, MAPK11, MMP14, LOC122420753, GNA11, LOC122440910, PLCB1, MAP2K7, SOS1, HRAS, PLCB2	1495	102	10427	1.43594	1	0.424917	0.409044
GOTERM_BP_DIRECT	GO:0001755~neural crest cell migration	8	0.190069	0.0866417	SEMA5B, SEMA6A, SEMA3C, SEMA4D, SEMA3B, SEMA3G, SEMA4F, SEMA3F	2526	25	15999	2.02679	1	1	1
KEGG_PATHWAY	ccad05168:Herpes simplex virus 1 infection	73	1.73438	0.086668	ZNF891, ZNF132, ZNF175, LOC122429603, CGAS, LOC122420031, TNF, IKBKB, ZNF81, LOC122420632, LOC122420279, ZNF606, ZNF84, LOC122421246, IKBKG, LOC122422854, ZNF169, IKBKE, ZFP37, ZNF641, ZNF684, LOC122420143, ZFP69B, LOC122420580, LOC122422848, IRF3, IFNG, TRAF5, LTA, SRSF5, ZNF599, LOC122420628, SRSF7, LOC122422844, ZNF674, IRF9, ZNF233, SRSF9, TLR2, ZNF473, ZNF790, PIK3R3, ZNF2, ZNF23, LOC1224328…	1495	431	10427	1.18131	1	0.424917	0.409044
KEGG_PATHWAY	ccad04814:Motor proteins	38	0.902827	0.0879528	LOC122454885, DCTN6, DNAH1, TUBAL3, LOC122430099, DCTN3, TUBD1, MYL6B, KLC1, ACTG2, KLC3, KLC2, KIF5A, MYL10, KIF1C, LOC122430098, KIF21A, MYH7B, DNAH17, MYO10, LOC122454534, TNNC2, TUBG2, TUBB4B, LOC122427692, KIF6, LOC122432901, LOC122445041, ACTA2, CENPE, MYO15B, KIFC1, KIF26A, MYO1A, TNNT3, LOC122422249, MYL9, TUBA8	1495	207	10427	1.28036	1	0.424917	0.409044
KEGG_PATHWAY	ccad05213:Endometrial cancer	14	0.332621	0.0887209	LOC122446062, TCF7L2, TCF7L1, PDPK1, PIK3R3, ILK, ELK1, EGFR, GADD45G, CCND1, LOC122440910, POLK, SOS1, HRAS	1495	61	10427	1.60072	1	0.424917	0.409044
KEGG_PATHWAY	ccad05170:Human immunodeficiency virus 1 infection	43	1.02162	0.0901518	LOC122446062, LOC122429603, PIK3R3, CGAS, RNF7, TNF, CCNB3, IKBKB, GNG3, PAK1, PPP3CB, LOC122420753, AP1G2, GNA11, CFL2, CHEK1, RAC3, AP1S1, GNG8, PAK6, IKBKG, MAP2K7, HRAS, AP1M2, PAK5, PAK4, PRKCG, JUN, LIMK1, PRKCA, GNG11, MAPK12, GNG13, MAPK10, MAPK11, WEE1, WEE2, RPS6KB1, IRF3, TRAF5, GNB3, LOC122440910, TLR2	1495	239	10427	1.25484	1	0.424917	0.409044
GOTERM_BP_DIRECT	GO:0016579~protein deubiquitination	18	0.427655	0.0903823	USP46, USP27X, WDR48, USP38, USP54, USP33, USP12, USP2, YOD1, JOSD2, UCHL3, USP28, USP39, UCHL5, LOC122437916, LOC122421740, LOC122435272, OTUD3	2526	77	15999	1.48061	1	1	1
KEGG_PATHWAY	ccad04621:NOD-like receptor signaling pathway	36	0.85531	0.0906465	LOC122424251, LOC122428376, LOC122424253, LOC122424252, LOC122424256, TNF, IKBKB, MAP1LC3A, CASP1, IKBKG, LOC122422854, IKBKE, LOC122422833, CTSB, GSDMD, LOC122424261, JUN, LOC122433435, LOC122426721, CARD9, ERBIN, MAPK12, P2RX7, MAPK10, LOC122422848, MAPK11, IRF3, TRIP6, TRAF5, PKN2, LOC122421313, SUGT1, PLCB1, LOC122422844, PLCB2, IRF9	1495	195	10427	1.28762	1	0.424917	0.409044
KEGG_PATHWAY	ccad05016:Huntington disease	65	1.54431	0.0906813	LOC122430038, NDUFA13, LOC122451456, NDUFA10, CLTB, LOC122432978, BBC3, PSMD8, PSMD9, LOC122427709, CREB3L3, CREB3L4, KIF5A, LOC122425524, EP300, PSMD1, TGM2, SDHC, LOC122434949, LOC122427692, CREB3, PSMA3, NDUFS7, PPIF, LOC122434662, LOC122422249, PLCB1, PLCB2, DCTN6, LOC122427289, NDUFB9, DNAH1, NDUFB7, PSMD11, TUBAL3, LOC122430099, DCTN3, NDUFB1, NRF1, KLC1, LOC122428174, PSMB6, KLC3, PSMB5, K…	1495	380	10427	1.19302	1	0.424917	0.409044
GOTERM_BP_DIRECT	GO:0006470~protein dephosphorylation	26	0.617724	0.0912222	PTPRT, PTPRS, PPM1L, PPM1M, PPM1N, PPM1J, PTPN23, PPM1E, PTPDC1, STYXL1, PTPRG, PPP4R2, PPP2R1B, ACP1, LOC122452399, PPP2R3A, DUSP8, PTPN14, SSH1, PTPRD, PPM1A, PTPRE, PTP4A3, LOC122439435, PTPN9, LOC122454175	2526	121	15999	1.36097	1	1	1
GOTERM_BP_DIRECT	GO:0007165~signal transduction	62	1.47303	0.0926029	TENM1, ECM1, RTKN, FAM13A, RTKN2, ARRB2, OLFML2A, ARHGAP35, GABRR1, YWHAQ, OPHN1, CCN6, TCP11L1, PDE8A, YWHAH, PDE4D, MAGI2, PDE4C, RRAS2, ANK3, VRK2, VRK3, TOM1L1, OLFM1, LOC122453084, SAG, PDE5A, PPP1R12B, RIN1, PLEKHH3, PDE1C, PLPPR5, CHRNA9, NDRG2, NDRG1, TTBK1, ARHGAP22, RRAS, CHRNE, SFN, PDE6A, PCNT, GABRE, LOC122453372, ANGPT4, MYO10, TNK2, RASSF8, ARHGAP28, TSPEAR, APLN, AFDN, CDK6, RPS6K…	2526	328	15999	1.19723	1	1	1
GOTERM_MF_DIRECT	GO:0008143~poly(A) binding	6	0.142552	0.0940842	LOC122425781, PABPC4, LOC122435776, PABPC1L, RBMS2, LOC122435903	2595	16	16442	2.37601	1	1	1
KEGG_PATHWAY	ccad00750:Vitamin B6 metabolism	4	0.0950344	0.0941543	PHOSPHO2, PNPO, LOC122426516, LOC122426514	1495	8	10427	3.48729	1	0.424917	0.409044
KEGG_PATHWAY	ccad00563:Glycosylphosphatidylinositol (GPI)-anchor biosynthesis	8	0.190069	0.0951364	DPM2, PIGU, PIGA, PIGZ, PIGW, PIGF, GPLD1, PIGH	1495	28	10427	1.99274	1	0.424917	0.409044
GOTERM_CC_DIRECT	GO:0005768~endosome	20	0.475172	0.0952626	RAB3B, RAB3C, VPS29, VPS18, RAB3A, RABL2B, SNX32, PTPN23, RAB33B, TOM1L1, RAB40B, RABEP1, NSG2, RAB26, RAB37, RAB13, ENTHD1, RAB11FIP2, ATP9B, LOC122454483	2355	91	15361	1.43356	1	1	1
KEGG_PATHWAY	ccad05012:Parkinson disease	60	1.42552	0.0953077	LOC122430038, NDUFA13, LOC122451456, NDUFA10, RYR3, LOC122432978, SLC6A3, PSMD8, PSMD9, LOC122427709, LOC122420753, KIF5A, LOC122425524, SLC39A5, PSMD1, SLC39A7, SLC39A1, SLC39A3, LOC122426721, SDHC, SLC39A13, LOC122434949, LOC122427692, PSMA3, NDUFS7, DDIT3, PPIF, LOC122434662, LOC122422249, PRKN, LOC122427289, NDUFB9, NDUFB7, PSMD11, TUBAL3, MAOB, LOC122430099, NDUFB1, UBE2J2, KLC1, UBE2J1, PSM…	1495	349	10427	1.19907	1	0.424917	0.409044
GOTERM_BP_DIRECT	GO:0000226~microtubule cytoskeleton organization	19	0.451414	0.0954717	BRSK2, TUBAL3, LOC122430099, TUBD1, TUBB4B, LOC122427692, PARD3B, TTLL7, NUAK1, PARD3, MAP7D2, TOGARAM2, TTLL11, SIK1, LOC122430098, LOC122422249, TSSK2, LOC122422899, TUBA8	2526	83	15999	1.44989	1	1	1
KEGG_PATHWAY	ccad04261:Adrenergic signaling in cardiomyocytes	31	0.736517	0.097384	POPDC2, ATF2, ADCY4, ATP1A3, CACNA1C, SLC8A1, PIK3R6, SLC8A2, PPP2CB, LOC122420753, RPS6KA5, PPP2R1B, CREB3L3, CREB3L4, SCN5A, SCN1B, CACNA2D3, CACNA2D2, PRKCA, ATP2B2, CACNA2D4, PPP2R3A, MAPK12, SLC8A3, CREB3, MAPK11, PPP1R1A, PPP2R2B, PLCB1, PLCB2, LOC122454175	1495	165	10427	1.31038	1	0.424917	0.409044
KEGG_PATHWAY	ccad05142:Chagas disease	23	0.546448	0.0997389	C1QB, JUN, TGFB2, NOS2, PIK3R3, TNF, MAPK12, IKBKB, C3, MAPK10, MAPK11, PPP2CB, GNA15, GNAL, IFNG, PPP2R1B, PPP2R2B, GNA11, BDKRB2, IKBKG, PLCB1, PLCB2, TLR2	1495	116	10427	1.38289	1	0.424917	0.409044

## Sheet: Suppl_table10_MF,BP, KEGG_DoDEG
Category	Term	Count	%	PValue	Genes	List Total	Pop Hits	Pop Total	Fold Enrichment	Bonferroni	Benjamini	FDR
GOTERM_CC_DIRECT	GO:0005634~nucleus	790	14.9282	3.20534e-13	ZNF296, SPI1, ZNF292, EHMT2, TESK1, SPIB, ZC3H12D, ZC3H12C, PSMD4, PSMD2, ZC3H12A, BBX, PRKACB, LOC122434428, PRKAB2, CSNK2A1, ZNF281, LOC122420022, ZNF12, DICER1, PRKAB1, OPTN, ATF4, SF1, RABL6, ZNF276, EXD2, SHMT2, MYNN, LOC122436634, IQGAP1, GATA2, OAZ1, OAZ2, HSPH1, PPARGC1B, LOC122423793, LOC122432027, NCAPH2, XNDC1N, PBX3, LOC122420285, ZNF32, LOC122420281, FLI1, PBX1, SNUPN, LOC122446657, …	3619	2723	15361	1.23143	2.19878e-10	2.19886e-10	2.15399e-10
GOTERM_MF_DIRECT	GO:0005524~ATP binding	369	6.97279	7.0036e-11	EIF4A2, PANK4, TRIO, ARAF, TESK1, SMC3, NUBP1, SMC2, NUBP2, RPS6KA4, RPS6KA3, LOC122438231, AKT2, CHEK2, CDK20, AKT1, PRKACB, DDX17, CSNK2A1, DAPK1, PRKCB, DDX11, PRKCE, PRKCD, MCCC1, MYO7B, DICER1, RUNX3, CLPX, RUNX2, RUNX1, DHX40, AFG3L2, LARS2, LARS1, BTK, SIK3, YME1L1, ULK2, ULK1, PRKCQ, SIK2, PRKD1, TRIB2, TARS1, EPHA2, AARS1, RTEL1, SLC22A5, ABCB1, DHX9, HSPA4L, TRANK1, PIK3R4, FIGNL2, DGUO…	3930	1152	16442	1.3401	9.88908e-08	9.88908e-08	9.85406e-08
GOTERM_CC_DIRECT	GO:0005829~cytosol	258	4.87528	8.71351e-09	PANK4, CDA, AHCYL2, MTRR, AHCYL1, RAPH1, ARAF, NTAQ1, PPP2R2A, NUBP1, NUBP2, TIAL1, LIPE, PSMD4, RPS18, PSMD5, DPYSL2, ANKS1A, GABARAPL2, STARD4, GABARAPL1, CSNK2A1, LOC122432124, GOLPH3L, AFAP1, WDR73, TIAM1, LOC122443603, LOC122435071, ARMC5, CLNS1A, HSBP1L1, RIN3, DXO, RIN2, TELO2, RABL6, BEX3, SHMT2, HSPA4L, BCL10, ADH5, STRIP1, AP5M1, SEC14L1, RNF213, HSPH1, PRDX4, PRDX1, BTF3, AFAP1L2, AFAP…	3619	800	15361	1.36887	5.97745e-06	2.98873e-06	2.92774e-06
KEGG_PATHWAY	ccad04218:Cellular senescence	74	1.39834	8.91218e-09	RB1, LOC122429686, CDKN1A, MRE11, TRAF3IP2, PTEN, PIK3CD, LOC122435446, FOXM1, ETS1, PPP1CC, PPP3CA, CCND3, RASSF5, MYC, AKT2, CHEK2, AKT1, CAPN1, NBN, BTRC, MAP2K1, FBXW11, TSC2, TSC1, SIRT1, LOC122429593, CDC25A, TGFBR2, RBL1, PIK3CA, CCNE1, LOC122435630, VDAC3, VDAC2, VDAC1, SLC25A5, RAF1, SQSTM1, TP53, SLC25A4, SLC25A6, ITPR2, LOC122427080, ITPR3, PIK3R1, LIN9, FOXO3, FOXO1, ZFP36L2, RELA, ZF…	2430	170	10427	1.86782	3.13708e-06	3.13709e-06	2.29934e-06
GOTERM_MF_DIRECT	GO:0005515~protein binding	661	12.4906	2.6479e-08	PATJ, GABPB2, TRIO, FRMPD4, COL12A1, GABPB1, SMC3, TSKU, BACH2, RRP9, SMC2, PREX1, PSMD6, PSMD7, WDR91, CDK20, UBASH3A, CEP97, ANKS1A, VPS39, NUP214, WSB1, WSB2, FNBP1, WDR74, ARMC9, WDR75, IFT80, WDR73, DICER1, WDR76, WDR77, HCFC1, ARMC1, RNF123, ARMC2, BIN3, WDR81, SPINT1, ARMC5, WDR82, TEP1, HECW2, SPARCL1, NHLRC2, SKAP1, SKAP2, SEH1L, FICD, PRKDC, AASDH, MYNN, NEDD4L, NOLC1, BAZ2A, BAZ2B, AAA…	3930	2320	16442	1.192	3.73877e-05	1.86942e-05	1.8628e-05
KEGG_PATHWAY	ccad04140:Autophagy - animal	79	1.49282	5.26042e-08	MTMR14, PTEN, WDR41, PIK3CD, ZFYVE1, MAP1LC3B, RB1CC1, AKT2, MLST8, AKT1, EPG5, CTSD, PRKACB, MAP3K7, RAB8A, VPS39, GABARAPL2, GABARAPL1, MAP2K1, DAPK1, PRKCD, LOC122432124, STX7, TSC2, WIPI1, TSC1, WIPI2, ERN1, VAMP8, LOC122443603, RRAGA, RRAGC, PIK3CA, GORASP2, TRAF6, ATG4C, TAX1BP1, ULK2, SMCR8, PRKCQ, PIK3C3, WDFY3, ULK1, RAF1, SQSTM1, UBA52, OPTN, RAB7A, RAB1A, BECN1, WDR45B, PIK3R4, PIK3R1,…	2430	192	10427	1.76555	1.85165e-05	6.68157e-06	4.89729e-06
KEGG_PATHWAY	ccad05132:Salmonella infection	111	2.09751	5.69452e-08	CYFIP2, NCKAP1, CYFIP1, CSE1L, FHOD1, FBXO22, ACTB, TXN2, MYC, AKT2, TUBB1, AKT1, KPNA4, MAP3K7, VPS39, SKP1, MAP2K4, MAP2K1, LOC122427612, DYNC1LI1, DYNC1LI2, LOC122427613, PFN1, RAF1, ARL8B, RAB5B, RAB5C, TCF7, KLC4, PODXL, VPS11, SNX9, RIPK1, NCKAP1L, FADD, S100A10, VPS16, MLKL, LOC122426544, LOC122426664, ARPC4, ARPC5, PTPRC, PLEKHM1, BCL2, PLEKHM2, TAB2, TAB1, RAB5A, ARF1, HSP90AB1, ARPC1B, …	2430	298	10427	1.59831	2.00445e-05	6.68157e-06	4.89729e-06
KEGG_PATHWAY	ccad04141:Protein processing in endoplasmic reticulum	82	1.54951	9.58306e-08	HSP90AB1, UBXN1, UBE2D4, PRKCSH, LOC122423465, UBE2D2, NGLY1, UBE2D3, LOC122428193, MAGT1, SEC61A1, MAN1A1, SEC61B, CAPN1, SEC62, UBXN4, UBXN6, MAP3K5, SKP1, SEC63, PDIA3, UBE4B, PDIA6, RAD23B, DDOST, CKAP4, PDIA4, ERN1, DNAJC3, TMEM258, LOC122435630, LOC122430140, PLAA, PREB, ATF4, PPP1R15A, LOC122430139, ATF6B, HSPA4L, RPN1, DERL1, RRBP1, RNF5, HSPBP1, DNAJB2, MAPK9, ATXN3, LMAN1, MAPK8, HSPH1,…	2430	204	10427	1.72479	3.37318e-05	6.84484e-06	5.01696e-06
KEGG_PATHWAY	ccad05135:Yersinia infection	65	1.22827	9.72279e-08	ITGB1, WIPF1, ARPC1B, PIK3CD, LOC122449214, WASL, ACTB, CRKL, RPS6KA3, AKT2, RAC2, AKT1, RAC1, MAP3K7, ACTR3, MAP2K4, ACTR2, LOC122424660, MAP2K1, CHUK, ITGA4, RHOG, LOC122441383, IRAK4, VAV1, RHOA, PIK3CA, LCK, CD8A, TRAF6, ARHGEF1, LCP2, ITGA5, CRK, ARF6, SKAP2, ROCK1, SRC, PXN, WAS, PIK3R1, RELA, CDC42, LOC122444227, MAPK9, MAPK8, PTK2B, MAPK1, PIP5K1A, PLCG1, PIP5K1C, WASF2, MAPK3, FYB1, NFAT…	2430	150	10427	1.85941	3.42236e-05	6.84484e-06	5.01696e-06
GOTERM_MF_DIRECT	GO:0003677~DNA binding	147	2.77778	1.78984e-07	MPG, ZFAND3, ZNF292, LOC122423300, ZFAND5, FBXO21, TIAL1, EME2, SPATA24, SMARCAD1, ADNP2, ZNF326, LOC122440602, BANF1, TMPO, ZBP1, LOC122422040, KDM2A, SP110, DDX11, WRNIP1, DICER1, WDR76, SUB1, TBPL1, BLM, RTEL1, TSHZ3, SP140, BAZ2A, RTF1, BAZ2B, SUPT6H, DEDD2, BRIP1, DEAF1, NTHL1, SURF6, ZBED1, LYAR, ZBED4, CDT1, LOC122430006, SETDB1, HMGA1, SMARCA2, LOC122429252, HOPX, H1-2, POLA2, H1-6, NABP2…	3930	418	16442	1.47131	0.000252694	8.4242e-05	8.39437e-05
KEGG_PATHWAY	ccad04660:T cell receptor signaling pathway	56	1.0582	3.11145e-07	ITK, PIK3CD, PPP2R2A, CD3G, PPP3CA, PPP2R5E, PPP2R1A, AKT2, AKT1, MAP3K7, NCK1, MAP2K1, CHUK, PPP2R5B, PPP2R5A, PPP2R5D, LOC122441383, VAV1, RHOA, PIK3CA, LCK, CD8A, PRKCQ, LCP2, RAF1, CARD11, PIK3R1, BCL10, RASGRP1, RELA, MALT1, PPP2CA, CDC42, LOC122444227, MAPK9, MAPK8, PPP3R1, MAPK1, FYN, PLCG1, PAK3, PAK2, MAPK3, NFATC3, NFATC2, PTPN11, MAPK14, CD4, TEC, PTPRC, CDK4, CD28, KRAS, PTPN6, NFKBIE…	2430	126	10427	1.90709	0.000109517	1.82538e-05	1.33792e-05
GOTERM_CC_DIRECT	GO:0005737~cytoplasm	628	11.867	3.25413e-07	PID1, TRIO, UXS1, TESK1, STMN3, PCMT1, RNF115, SAMD14, DPYSL2, STMN1, UBASH3A, VPS39, DDX17, PRKAB2, TSTD1, DAPK1, PIH1D1, FRS2, DNAAF5, DICER1, PRKAB1, RUFY1, RNF123, BIN3, BIN1, LOC122435630, HMBS, PSME2, IDNK, PADI4, TARS1, UBA52, SKAP1, OPTN, SKAP2, OTULINL, IDO1, EXD2, SHMT2, PRDM15, TPRG1L, LOC122436634, XPC, IQGAP1, ARPP19, IQGAP3, OAZ1, OAZ2, RIC8A, LDHB, PRDX5, PPP4C, ATG7, S100A11, S100…	3619	2260	15361	1.17946	0.000223208	7.4411e-05	7.28924e-05
KEGG_PATHWAY	ccad04380:Osteoclast differentiation	59	1.11489	5.25904e-07	SPI1, PIK3CD, ATP2A2, PPP3CA, AKT2, AKT1, SIRPA, RAC1, MAP3K7, JAK1, MAP2K1, CHUK, SYK, IL1R1, IFNGR1, IFNGR2, TYK2, TGFBR2, PIK3CA, LCK, TRAF6, BTK, PPARG, LCP2, LOC122421511, SQSTM1, IFNAR1, LOC122421185, ITPR2, ITPR3, TNFRSF11A, PIK3R1, RELA, RELB, MAPK9, SOCS3, MAPK8, PPP3R1, SOCS1, LOC122421222, PLCG2, MAPK1, LOC122420817, FYN, LOC122421229, MAPK3, LOC122421171, LOC122421172, TGFB1, STAT1, L…	2430	137	10427	1.84793	0.000185101	2.60808e-05	1.91161e-05
KEGG_PATHWAY	ccad04662:B cell receptor signaling pathway	42	0.793651	5.92746e-07	LOC122421185, PIK3CD, BCL10, PIK3R1, RELA, MALT1, RASGRP3, PPP3CA, PPP3R1, CD19, AKT2, PLCG2, RAC2, LOC122421222, MAPK1, AKT1, RAC1, MAPK3, LOC122421229, LOC122421171, CR2, MAP2K1, LOC122421172, CHUK, SYK, PRKCB, LOC122421175, LOC122431079, NFATC3, LOC122430804, NFATC2, VAV1, PIK3CA, BTK, KRAS, PTPN6, LOC122421511, PIK3AP1, NFKBIE, RAF1, CD22, CARD11	2430	86	10427	2.09558	0.000208625	2.60808e-05	1.91161e-05
KEGG_PATHWAY	ccad05168:Herpes simplex virus 1 infection	144	2.72109	1.17982e-06	ZNF331, LOC122429366, LOC122420030, PPP1CC, LOC122420035, AKT2, ZNF605, AKT1, ZNF569, MAP3K7, ZNF565, ZNF200, PDIA3, ZNF560, DAXX, ZFP1, ZNF283, ZNF282, LOC122420022, TAP2, TSC2, LOC122420021, TSC1, ZNF12, LOC122429593, HCFC1, LOC122420388, ZNF317, SRSF3, ZNF316, LOC122440459, SRSF4, ZNF557, LOC122443968, SRSF6, TP53, ZNF554, ZNF311, IFNAR1, ZNF398, ZNF793, ZNF275, LOC122421383, PIK3R1, ZNF26, LO…	2430	431	10427	1.43363	0.000415212	4.61442e-05	3.38216e-05
KEGG_PATHWAY	ccad04062:Chemokine signaling pathway	74	1.39834	1.77762e-06	ITK, LOC122425045, GSK3A, LOC122426699, LOC122425049, PIK3CD, LOC122428192, LOC122449214, PIK3CG, CRKL, PREX1, AKT2, RAC2, AKT1, CCR8, RAC1, JAK2, CCR4, PRKACB, CCR3, CCR2, MAP2K1, CHUK, PRKCB, PRKCD, VAV1, RHOA, FGR, TIAM1, PLCB3, PLCB4, ADCY9, PIK3CA, DOCK2, RAF1, CRK, LOC122441627, ROCK1, SHC1, SRC, PXN, GNAI3, WAS, CXCR4, ADCY3, CXCR6, PIK3R1, FOXO3, GNAI1, RELA, PIK3R5, GNAI2, RAP1B, CDC42, …	2430	190	10427	1.67121	0.000625526	5.96335e-05	4.37087e-05
KEGG_PATHWAY	ccad05169:Epstein-Barr virus infection	85	1.6062	1.86355e-06	RB1, LOC122429686, LOC122429366, CDKN1A, TRADD, PIK3CD, TNFAIP3, CD3G, ITGAL, CASP9, PSMD6, CCND3, CASP8, PSMD7, PSMD4, SIN3A, MYC, AKT2, PSMD2, AKT1, RAC1, MAP3K7, JAK1, PDIA3, MAP2K4, CR2, USP7, CHUK, SYK, TAP2, TYK2, IRAK4, RUNX3, LOC122429593, SAP30, PIK3CA, CCNE1, TRAF6, IRF7, BTK, LOC122443968, TP53, IFNAR1, PSMD12, HDAC2, PSMD13, HDAC1, LOC122429106, LOC122427080, PIK3R1, RELA, RELB, LOC12…	2430	227	10427	1.60674	0.000655754	5.96335e-05	4.37087e-05
KEGG_PATHWAY	ccad04144:Endocytosis	97	1.83296	2.27004e-06	WASHC5, LOC122425045, WIPF1, ZFYVE27, VPS35, WASHC1, VPS36, SH3GL1, USP8, LOC122429593, RUFY1, ACAP2, BIN1, RAB35, STAM2, RAB5B, LOC122430139, TSG101, RAB5C, NEDD4L, LOC122427080, PLD1, SNX1, GRK2, SNX2, GRK5, PIP5K1A, PIP5K1C, SNX6, RAB11FIP5, HSPA8, SMAD3, SMURF2, IQSEC2, SMURF1, LOC122432541, ARPC4, ARPC5, IGF2R, EHD1, DAB2, CHMP2A, LOC122426789, RAB5A, FGFR2, ARF3, ARF4, LOC122429686, ARF1, L…	2430	269	10427	1.54729	0.000798734	6.65877e-05	4.88058e-05
KEGG_PATHWAY	ccad04137:Mitophagy - animal	54	1.02041	2.71311e-06	TOMM20, MAP1LC3B, OPA1, FUNDC1, USP30, USP8, GABARAPL2, BNIP3L, GABARAPL1, CSNK2A1, TFEB, TOMM40L, CSNK2B, TAX1BP1, PGAM5, ULK1, SQSTM1, TP53, UBA52, OPTN, RAB7A, ATF4, BECN1, RAB5B, RAB5C, TOMM40, SRC, LOC122454429, FOXO3, HIF1A, RELA, MAPK9, BCL2L13, RHOT2, MAPK8, RHOT1, SAMM50, UBB, UBC, MFN1, TBC1D17, MARCHF5, SMURF2, SMURF1, AMFR, MTX3, CCZ1, HUWE1, EIF2AK3, PINK1, SP1, KRAS, RAB5A, MON1B	2430	127	10427	1.8245	0.000954559	6.82153e-05	4.99987e-05
KEGG_PATHWAY	ccad04071:Sphingolipid signaling pathway	54	1.02041	2.71311e-06	TRADD, PTEN, PIK3CD, PPP2R2A, PPP2R5E, PPP2R1A, SPTLC3, SMPD1, AKT2, RAC2, AKT1, RAC1, CTSD, MAP3K5, MAP2K1, SPHK2, PRKCB, PRKCE, PPP2R5B, PPP2R5A, PPP2R5D, RHOA, PLCB3, PLCB4, PIK3CA, RAF1, TP53, CERS2, ROCK1, GNAI3, PIK3R1, SGMS2, PLD1, GNAI1, RELA, GNAI2, GNA13, PPP2CA, MAPK9, SGPL1, MAPK8, GNA12, S1PR1, MAPK1, FYN, S1PR5, BID, S1PR4, MAPK3, MAPK14, BCL2, BAX, KRAS, DEGS1	2430	127	10427	1.8245	0.000954559	6.82153e-05	4.99987e-05
KEGG_PATHWAY	ccad05211:Renal cell carcinoma	37	0.699169	3.44488e-06	CDKN1A, EPAS1, PRCC, CUL2, ARAF, SLC2A1, PIK3CD, TGFA, PIK3R1, HIF1A, ETS1, CRKL, RAP1B, CDC42, FLCN, RAP1A, AKT2, MAPK1, AKT1, VHL, RAC1, PAK3, PAK2, MAPK3, EGLN3, MAP2K1, TGFB1, EGLN2, BAD, ARNT, PTPN11, PIK3CA, RAPGEF1, KRAS, RAF1, MET, CRK	2430	76	10427	2.08901	0.00121187	8.08399e-05	5.9252e-05
KEGG_PATHWAY	ccad05203:Viral carcinogenesis	82	1.54951	4.351e-06	YWHAE, RB1, LOC122429686, LOC122425045, CDKN1A, DDX3X, YWHAB, TRADD, PIK3CD, CHD4, POLB, CCND3, CASP8, CREB3L2, CCR8, LOC122440602, RAC1, CCR4, PRKACB, CCR3, YWHAG, JAK1, USP7, SYK, TRAF1, YWHAZ, RHOA, LOC122429593, KAT2B, PKM, RBL1, PIK3CA, CCNE1, IRF7, VDAC3, TBPL1, IL6ST, ATP6V0D1, TP53, MAD1L1, LOC122441627, ATF4, HDAC2, LOC122429189, ATF6B, HDAC1, SRC, SRF, PXN, LOC122436634, LOC122427080, P…	2430	221	10427	1.59212	0.00153038	9.57219e-05	7.01598e-05
KEGG_PATHWAY	ccad05212:Pancreatic cancer	38	0.718065	5.12552e-06	RB1, RALA, CDKN1A, RALB, ARAF, PIK3CD, TGFA, PIK3R1, PLD1, RELA, CASP9, CDC42, MAPK9, MAPK8, AKT2, RAC2, MAPK1, AKT1, BAK1, RAC1, MAPK3, JAK1, RALBP1, MAP2K1, SMAD3, TGFB1, CHUK, STAT1, BAD, STAT3, TGFBR2, PIK3CA, CDK4, BAX, KRAS, RAF1, TP53, ARHGEF6	2430	80	10427	2.0382	0.00180256	0.000106128	7.77873e-05
KEGG_PATHWAY	ccad05017:Spinocerebellar ataxia	63	1.19048	6.00762e-06	PIK3CD, ATP2A2, PSMD6, PSMD7, KAT5, PSMD4, OPA1, RB1CC1, AKT2, PSMD2, AKT1, MAP3K5, PRKCB, TWNK, WIPI1, WIPI2, PSMA5, ERN1, ATXN2L, AFG3L2, PLCB3, PSMA4, PLCB4, PIK3CA, VDAC3, TBPL1, VDAC2, ULK2, VDAC1, PIK3C3, ULK1, SLC25A5, SLC25A4, SLC25A6, BECN1, PSMD12, PSMD13, PIK3R4, ITPR2, ITPR3, PIK3R1, OMA1, PSMA7, MAPK9, ATXN3, PSMB7, MAPK8, ATXN1, PSMB3, PSMB1, NRBF2, NOP56, LOC122453267, XBP1, GRIN2D…	2430	159	10427	1.70019	0.00211245	0.000117482	8.61092e-05
KEGG_PATHWAY	ccad04120:Ubiquitin mediated proteolysis	65	1.22827	6.63611e-06	DET1, UBE2D4, UBE2D2, UBE2D3, UBE3B, BRCA1, UBE2Z, PRPF19, HERC4, CDC23, HERC2, UBE2Q1, CDC27, FBXO4, BTRC, SKP1, FBXW11, UBE4A, UBE4B, UBE2R2, TRAF6, ANAPC4, UBA52, ANAPC1, BIRC3, CUL7, CUL5, UBA7, UBA6, CUL2, NEDD4L, LOC122427080, RCHY1, RHOBTB2, SOCS3, SOCS1, UBB, UBR5, UBC, VHL, UBE2F, UBE2H, PPIL2, UBE2I, LOC122453866, SMURF2, SMURF1, SYVN1, HUWE1, UBE2A, UBE2G2, KLHL9, CUL4A, ITCH, UBE2S, N…	2430	166	10427	1.68019	0.00233319	0.000122943	9.01113e-05
GOTERM_MF_DIRECT	GO:0003729~mRNA binding	68	1.28496	7.23414e-06	RBM25, LOC122435446, HNRNPR, ZC3H12D, NYNRIN, TIAL1, ZC3H12C, SNRNP70, PCF11, ZC3H12A, RBPMS2, SNIP1, LUC7L, EIF2A, SRRM2, AQR, RBM15, NCBP1, THOC2, THOC5, CDC40, PTBP2, NCL, ZNF638, RPL24, SRSF4, NCBP3, SRSF6, SF1, FYTTD1, KHDRBS1, LOC122430499, RBM47, RBM8A, POLDIP3, CSTF3, LOC122430498, SRSF1, CSTF2, LOC122436634, RBM4B, HNRNPLL, ZFP36L2, ZFP36L1, BCLAF1, RBM15B, PCBP1, G3BP1, PCBP2, G3BP2, ZC…	3930	172	16442	1.65403	0.0101627	0.00255365	0.00254461
KEGG_PATHWAY	ccad05163:Human cytomegalovirus infection	89	1.68178	7.7187e-06	RB1, LOC122429686, LOC122425045, CDKN1A, LOC122426699, LOC122425049, TRADD, PIK3CD, LOC122449214, FASLG, CRKL, CASP9, AKAP13, PPP3CA, CASP8, MYC, AKT2, CREB3L2, RAC2, AKT1, ITGAV, RAC1, PRKACB, CCR3, JAK1, PDIA3, MAP2K1, CHUK, IL1R1, PRKCB, TAP2, TSC2, TSC1, RHOA, LOC122429593, PLCB3, PLCB4, ADCY9, PIK3CA, ARHGEF1, LOC122443968, RAF1, CRK, TP53, ATF4, PTGER4, ATF6B, ROCK1, PTGER1, SRC, PTGER2, PX…	2430	248	10427	1.5399	0.0027133	0.00013182	9.66182e-05
KEGG_PATHWAY	ccad03015:mRNA surveillance pathway	49	0.925926	7.86427e-06	HBS1L, SMG1, PPP2R2A, MSI2, SMG7, NXT2, SMG5, SMG6, PPP1CC, PNN, PPP2R5E, PPP2R1A, PCF11, PAPOLA, PAPOLB, PELO, UPF2, UPF1, NCBP1, LOC122423495, NCBP2, PPP2R5B, PPP2R5A, PPP2R5D, SRRM1, DDX19B, WDR82, ETF1, PABPC1, RBM8A, RNMT, CSTF3, CSTF2, GSPT2, GSPT1, PPP2CA, NXF1, FIP1L1, CSTF1, LOC122421663, CPSF4, RNGTT, FUS, CPSF2, PYM1, UPF3B, PPP1CA, NUDT21, RNPS1	2430	115	10427	1.82832	0.00276441	0.00013182	9.66182e-05
KEGG_PATHWAY	ccad05166:Human T-cell leukemia virus 1 infection	91	1.71958	9.34445e-06	RB1, LOC122429686, NRP1, LOC122429366, CDKN1A, SPI1, CRTC3, SLC2A1, PTEN, PIK3CD, BUB1B, CD3G, ITGAL, ETS1, ELK4, POLB, PPP3CA, CCND3, CDC23, XPO1, KAT5, MYC, AKT2, CHEK2, CREB3L2, CDC27, AKT1, PRKACB, JAK1, MAP2K4, MAP2K1, CHUK, IL1R1, LOC122429593, TGFBR2, KAT2B, ADCY9, PIK3CA, ESPL1, CCNE1, LCK, VDAC3, ANAPC4, TBPL1, VDAC2, VDAC1, TLN2, LOC122443968, SLC25A5, TP53, SLC25A4, ANAPC1, MAD1L1, LOC…	2430	256	10427	1.5253	0.00328386	0.000145211	0.000106433
KEGG_PATHWAY	ccad04148:Efferocytosis	66	1.24717	9.73351e-06	SLC2A1, ATP2A2, CRKL, PANX1, GPR132, CASP7, SIRPA, ITGAV, RAC1, JAK2, SCARF1, VPS39, DUSP5, CPT1A, MAP2K1, ARG1, SPHK2, ADAM10, ARNT, ATP11B, ATP11A, SIRT1, CPT1B, DUSP7, ADAM17, PECAM1, PPARG, CD47, MFGE8, CRK, RAB7A, PPARD, PTGER4, C1QA, CAMK2D, RAB5B, RAB5C, LRP1, SLC66A1, PTGER2, ODC1, TGFBRAP1, PLA2G6, HIF1A, ALOX5, VPS8, VPS11, S1PR1, MAPK1, VPS16, MAPK3, SLC16A1, TGFB1, TMEM30A, NR1H2, NFA…	2430	171	10427	1.65615	0.00342035	0.000145211	0.000106433
KEGG_PATHWAY	ccad05235:PD-L1 expression and PD-1 checkpoint pathway in cancer	42	0.793651	9.90075e-06	PTEN, PIK3CD, CD3G, PIK3R1, HIF1A, RASGRP1, RELA, LOC122444227, PPP3CA, PPP3R1, AKT2, MAPK1, AKT1, PLCG1, JAK2, MAPK3, JAK1, MAP2K1, CSNK2A1, CHUK, STAT1, IFNGR1, IFNGR2, STAT3, NFATC3, NFATC2, PTPN11, LOC122441383, MAPK14, EML4, CD4, PIK3CA, LCK, TRAF6, CSNK2B, CD28, KRAS, PRKCQ, PTPN6, NFKBIE, RAF1, LAT	2430	94	10427	1.91723	0.00347902	0.000145211	0.000106433
KEGG_PATHWAY	ccad04931:Insulin resistance	48	0.907029	1.08996e-05	PYGB, PRKAG1, SLC2A1, PTEN, PIK3CD, PYGM, PYGL, PIK3R1, FOXO1, RELA, PTPRF, PTPA, PPP1CC, RPS6KA3, GYS1, MAPK9, SOCS3, MAPK8, AKT2, CREB3L2, MLX, AKT1, PPARGC1B, PTPN1, SREBF1, CPT1A, PRKAB2, PRKCB, PRKCE, NR1H2, STAT3, PRKCD, GFPT1, OGA, PTPN11, PRKAB1, CPT1B, PPP1CA, MLXIPL, TBC1D4, PIK3CA, PPP1R3B, PPP1R3E, PPP1R3D, PRKCQ, OGT, SLC27A2, SLC27A4	2430	113	10427	1.8227	0.00382932	0.000153466	0.000112484
GOTERM_BP_DIRECT	GO:0006915~apoptotic process	25	0.472411	1.19844e-05	CYFIP2, NOTCH2, PPP1R13B, PRUNE2, FASLG, BCL10, GRAMD4, SAV1, DEDD2, CASP9, TFPT, BCL2L13, PIDD1, CASP7, CASP8, AIFM1, CASP6, RELT, BAD, TNFRSF9, PAWR, XAF1, TP53, DAP3, TP73	3832	44	15999	2.37222	0.0261264	0.0264616	0.0264377
GOTERM_MF_DIRECT	GO:0005484~SNAP receptor activity	23	0.434618	1.30243e-05	SNAP47, STX12, STX16, STX7, STX18, GOSR1, SNAP23, BET1L, STX11, VAMP8, VAMP7, STX6, VTI1A, STX5, VAMP1, STX4, STX3, SEC22B, YKT6, VAMP2, VAMP3, VTI1B, BET1	3930	39	16442	2.46732	0.0182223	0.00367805	0.00366503
GOTERM_MF_DIRECT	GO:0005525~GTP binding	120	2.26757	1.87039e-05	RAB3D, RAB44, RAB42, GNAT2, TUBB1, ARL16, RAB2A, RAB2B, LOC122427612, ARL15, GTPBP2, GTPBP1, GEM, EEF1A1, RAB32, LOC122449829, RRAGA, RRAGC, RAB36, LOC122438862, RAB35, LOC122427613, ARL8B, RABL6, RAB5B, RAB5C, ARL1, DNAJC27, GSPT2, GSPT1, RHOBTB2, RAP1B, RHOT2, CRACR2A, RHOT1, RAP1A, LOC122438655, RAB6A, EEFSEC, LOC122432303, LOC122426544, LOC122426664, RAB39B, GNAO1, EHD1, GNL3L, EIF2S3, RHEB, …	3930	354	16442	1.41821	0.0260644	0.00440165	0.00438606
KEGG_PATHWAY	ccad04722:Neurotrophin signaling pathway	52	0.982615	1.96735e-05	YWHAE, PRDM4, PIK3CD, FASLG, CRKL, RPS6KA3, AKT2, AKT1, RAC1, MAP3K5, MAP2K1, PRKCD, FRS2, IRAK4, RHOA, PIK3CA, TRAF6, RAPGEF1, RAF1, CRK, TP53, ATF4, BEX3, CAMK2D, SHC1, MAGED1, PIK3R1, PSEN1, FOXO3, RELA, RAP1B, CDC42, MAPK9, MAPK8, RAP1A, PLCG2, ABL1, MAPK1, PLCG1, SH2B3, MAPK3, KIDINS220, SORT1, BAD, PTPN11, MAPK14, CAMK4, BCL2, BAX, KRAS, NFKBIE, TP73	2430	128	10427	1.7432	0.00690122	0.000266349	0.000195222
KEGG_PATHWAY	ccad05145:Toxoplasmosis	52	0.982615	2.52711e-05	ITGB1, LOC122425045, CIITA, LOC122429366, LOC122423465, LOC122428193, LAMC1, PIK3CG, CASP9, CASP8, AKT2, AKT1, JAK2, MAP3K7, JAK1, CHUK, IFNGR1, IFNGR2, TYK2, IRAK4, TRAF6, LOC122430140, BIRC3, LOC122430139, LAMA4, LOC122429106, LAMA3, GNAI3, GNAI1, RELA, PIK3R5, GNAI2, MAPK9, MAPK8, SOCS1, ALOX5, MAPK1, LOC122429902, LDLR, MAPK3, HSPA8, LOC122429972, TGFB1, IL10RB, STAT1, BAD, STAT3, MAPK14, GNA…	2430	129	10427	1.72968	0.00885611	0.000329461	0.00024148
KEGG_PATHWAY	ccad04810:Regulation of actin cytoskeleton	89	1.68178	3.1096e-05	ITGB1, CYFIP2, CYFIP1, CHRM3, NCKAP1, ITGAM, ARPC1B, ARAF, BRK1, PIK3CD, WASL, ITGAL, ACTB, CRKL, LOC122421209, PPP1CC, TMSB4X, AKT2, CFL1, RAC2, LOC122426218, PIP4K2A, AKT1, ITGAV, PIP4K2C, RAC1, ACTR3, ACTR2, LOC122424660, MAP2K1, PPP1R12A, ITGA4, F2R, ITGA1, VAV1, RHOA, TIAM1, PIK3CA, SPATA13, LOC122433255, ITGA7, ARHGEF1, ITGA5, EZR, RAF1, PFN1, PPP1R12C, CRK, VCL, ITGA9, ARHGEF6, ROCK1, SRC,…	2430	256	10427	1.49177	0.0108863	0.000390921	0.000286527
KEGG_PATHWAY	ccad04611:Platelet activation	52	0.982615	3.23009e-05	ITGB1, GUCY1B1, SNAP23, PIK3CD, PIK3CG, ACTB, PPP1CC, AKT2, AKT1, PRKACB, PTGIR, PPP1R12A, SYK, F2R, RHOA, VAMP8, PLCB3, PLCB4, ADCY9, PIK3CA, BTK, ORAI1, ARHGEF1, LCP2, TLN2, ROCK1, SRC, GNAI3, ITPR2, ADCY3, ITPR3, PIK3R1, RASGRP1, GNAI1, PIK3R5, PTGS1, GNAI2, RAP1B, GNA13, RAP1A, TBXA2R, P2RY1, PLCG2, MAPK1, FYN, LOC122425824, MAPK3, MAPK14, PPP1CA, P2RX1, TBXAS1, FERMT3	2430	130	10427	1.71638	0.0113057	0.000392066	0.000287367
KEGG_PATHWAY	ccad03083:Polycomb repressive complex	40	0.755858	4.79057e-05	HDAC2, L3MBTL3, L3MBTL2, USP16, UBE2D4, HDAC1, PHF1, UBE2D2, UBE2D3, FOXK2, FOXK1, BMI1, LOC122449871, RBBP4, SCMH1, WDR5, PCGF1, RBBP7, JARID2, SKP1, MBD5, USP7, MBD6, KDM2A, RING1, LOC122453866, CBX4, AUTS2, SFMBT1, EED, TEX10, SFMBT2, USP45, PHC3, HCFC1, TFDP1, AEBP2, CSNK2B, OGT, BAP1	2430	93	10427	1.84557	0.0167218	0.000562094	0.000411989
KEGG_PATHWAY	ccad01232:Nucleotide metabolism	38	0.718065	5.16797e-05	HDDC2, CDA, GMPS, AK2, AK4, NTPCR, NT5C2, AK6, TYMS, AK7, NT5C, DGUOK, NT5E, LOC122437104, ENPP1, TK2, NUDT16, UPP1, LOC122434352, RRM1, ENTPD4, ENTPD5, NME2, CTPS2, NME3, ADA2, AMPD3, DCK, DCTD, UCK2, UCK1, NME6, IMPDH2, CMPK1, ADSS1, HPRT1, ADSS2, DCTPP1	2430	87	10427	1.87421	0.0180272	0.000586814	0.000430108
KEGG_PATHWAY	ccad00562:Inositol phosphate metabolism	33	0.623583	5.83726e-05	MTMR2, INPP1, MTMR14, MTMR8, PTEN, PIK3CD, MTMR4, PIK3C2A, MTMR6, PIK3CG, INPP5F, IMPA2, PLCG2, PIP4K2A, PIP5K1A, PIP4K2C, PLCG1, PIP5K1C, CDIPT, MIOX, TPI1, SACM1L, ITPK1, SYNJ2, FIG4, ALDH6A1, PLCB3, PLCB4, PIK3CA, PIK3C3, PI4KB, PLCD1, PI4K2A	2430	72	10427	1.96668	0.0203381	0.000642099	0.000470629
KEGG_PATHWAY	ccad05206:MicroRNAs in cancer	63	1.19048	6.61308e-05	CDKN1A, BMPR2, PTEN, PIK3CD, BRCA1, BMI1, CRKL, PLAU, MYC, STMN1, PIM1, MAP2K1, PRKCB, PRKCE, TPM1, KIF23, DICER1, CDC25C, SIRT1, RHOA, CDC25A, FOXP1, ZEB2, PIK3CA, CCNE1, ITGA5, EZR, RAF1, MET, CRK, TP53, NOTCH2, HDAC2, ABCB1, NOTCH1, ROCK1, SHC1, HDAC1, LOC122436634, LOC122427080, PIK3R1, SLC7A1, SOCS1, PLCG2, ABL1, MAPK1, BAK1, PLCG1, MAPK3, MCL1, UBE2I, STAT3, RDX, MARCKS, HNRNPK, APC, CCNG1,…	2430	170	10427	1.59017	0.02301	0.000705396	0.000517023
KEGG_PATHWAY	ccad04666:Fc gamma R-mediated phagocytosis	43	0.812547	7.17228e-05	ARPC1B, WAS, PIK3CD, PIK3R1, PLD1, PLA2G6, CRKL, LOC122431989, CDC42, SCIN, AKT2, CFL1, PLCG2, RAC2, MAPK1, PIP5K1A, AKT1, PLCG1, RAC1, PIP5K1C, WASF2, MAPK3, ACTR3, ACTR2, LOC122424660, MAP2K1, GSN, SYK, SPHK2, PRKCB, PRKCE, PRKCD, ARPC4, ARPC5, VAV1, MARCKS, PTPRC, PIK3CA, BIN1, RAF1, CRK, LAT, ARF6	2430	104	10427	1.77414	0.0249313	0.000730219	0.000535217
GOTERM_CC_DIRECT	GO:0005739~mitochondrion	166	3.13681	7.21509e-05	ISCA2, MTCH1, ISCA1, OSGEPL1, ECI1, ARAF, YARS2, TXN2, ATP5IF1, CHCHD3, CHCHD6, NARS2, NUDT19, PMPCB, ACAD11, SLC25A44, HEMK1, PDHX, MIX23, LOC122434823, CPT1A, RSAD2, PHYKPL, CMC2, ECH1, MCCC1, TOMM34, LOC122420262, CPT1B, PISD, LARS2, WDR81, POLG2, MTHFD2, CARD19, TMEM126A, LOC122421476, SUCLG1, LOC122435198, RAF1, LIPT2, AARS1, LOC122423043, MRPL18, IREB2, AK2, AK4, MRPL14, PLA2G6, LIAS, HIGD1…	3619	538	15361	1.30965	0.0482923	0.0100768	0.00987118
KEGG_PATHWAY	ccad04659:Th17 cell differentiation	47	0.888133	7.2607e-05	LOC122429366, HSP90AB1, LOC122429106, CD3G, AHR, IL2RG, HIF1A, RELA, LOC122444227, MAPK9, PPP3CA, PPP3R1, MAPK8, TBX21, MAPK1, LOC122429902, PLCG1, JAK2, MAPK3, JAK1, LOC122429972, SMAD3, IL4R, TGFB1, CHUK, IL1R1, STAT1, IFNGR1, IFNGR2, STAT3, NFATC3, NFATC2, LOC122441383, TYK2, MAPK14, FOXP3, TGFBR2, RUNX1, CD4, LCK, IRF4, IL2RB, PRKCQ, IL6ST, NFKBIE, LAT, LOC122441627	2430	117	10427	1.72371	0.0252347	0.000730219	0.000535217
GOTERM_BP_DIRECT	GO:0006886~intracellular protein transport	66	1.24717	7.31775e-05	ARF3, ARF4, ARF1, CLTC, AP2A1, AP2A2, RIMS1, ARL5B, AP1G1, TMED2, ARFIP1, VPS35, SEC61B, ARL5A, VPS39, WLS, COG3, STX7, FAM91A1, COPZ1, SYTL3, SYTL2, RABL3, EXOC6, ARF6, COPB2, STX12, TMED10, RAMP3, STXBP3, STX16, COPB1, TGFBRAP1, STX18, STXBP2, VPS26C, ARL1, STX11, NAPG, AP3M2, GGA1, SNX1, SNX2, SNX27, SCFD2, VPS11, STX6, VTI1A, STX5, STX4, SNX9, STX3, SEC23B, SEC31B, VPS16, VTI1B, SNX6, BCAP31,…	3832	176	15999	1.56566	0.149265	0.080788	0.0807148
GOTERM_CC_DIRECT	GO:0005783~endoplasmic reticulum	105	1.98413	7.34462e-05	ANKLE2, PGAP1, KDELR1, PLOD3, TXNDC12, ZDHHC7, PLOD1, POFUT1, PIEZO1, CLCC1, SEC62, PDIA3, STARD4, RSAD2, ACSL1, SACM1L, SHISA5, P3H1, ATP11B, ATP11A, TEX2, PDIA5, DHDDS, PDIA4, LOC122438862, SLC27A2, LRPAP1, TMED10, NECAB3, ITPR2, PLD4, ITPR3, PSEN1, TMTC4, SGPL1, APH1B, PRDX4, TMEM129, SSR1, EDEM3, HHATL, NDFIP2, NDFIP1, ICMT, EDEM1, SURF4, SRD5A3, ERLIN1, TOR1B, SQLE, TBL2, P4HA1, CALU, RNF185…	3619	315	15361	1.41485	0.0491377	0.0100768	0.00987118
KEGG_PATHWAY	ccad04621:NOD-like receptor signaling pathway	70	1.32275	7.92206e-05	YWHAE, HSP90AB1, LOC122420990, TNFAIP3, LOC122428192, LOC122449214, ANTXR2, TXN2, PANX1, PSTPIP1, MAP1LC3B, CASP8, NAMPT, MAP3K7, JAK1, GABARAPL2, GABARAPL1, LOC122432323, CHUK, RIPK3, PRKCD, TYK2, IRAK4, RHOA, PLCB3, PLCB4, TRAF6, IRF7, VDAC3, VDAC2, VDAC1, RBCK1, IFNAR1, BIRC3, LOC122436719, LOC122424250, RNASEL, LOC122435269, ITPR2, ITPR3, NOD1, LOC122436715, TANK, RELA, TRPM2, MAPK9, MAPK8, S…	2430	195	10427	1.54034	0.0275015	0.000774151	0.000567417
KEGG_PATHWAY	ccad04130:SNARE interactions in vesicular transport	21	0.396825	8.13738e-05	STX16, STX7, STX18, GOSR1, SNAP23, BET1L, STX11, VAMP8, VAMP7, STX6, VTI1A, STX5, VAMP1, STX4, STX3, SEC22B, YKT6, VAMP2, VAMP3, VTI1B, BET1	2430	38	10427	2.37131	0.0282384	0.000774151	0.000567417
KEGG_PATHWAY	ccad04217:Necroptosis	69	1.30385	0.000103285	PYGB, HSP90AB1, TRADD, LOC122423300, TNFAIP3, PYGM, FASLG, PYGL, CASP8, AIFM1, SMPD1, FTH1, CHMP1B, CHMP1A, CAPN1, LOC122434077, JAK2, JAK1, ZBP1, LOC122422040, PARP1, RIPK3, IFNGR1, IFNGR2, TYK2, LOC122435630, VDAC3, VDAC2, PGAM5, VDAC1, RBCK1, SLC25A5, PPIA, SQSTM1, CHMP7, SLC25A4, TLR3, IFNAR1, BIRC3, LOC122441627, FTL, SLC25A6, LOC122432636, CAMK2D, VPS4A, LOC122435269, LOC122429182, LOC12242…	2430	193	10427	1.53407	0.0357052	0.000956747	0.000701252
KEGG_PATHWAY	ccad05014:Amyotrophic lateral sclerosis	142	2.6833	0.000141901	NUP188, ACTB, PSMD6, PSMD7, PSMD4, PSMD2, TUBB1, MAP3K5, NUP214, DAXX, NUP210, LOC122427612, SDHD, SDHA, SDHB, NUP93, ERN1, ATXN2L, SRSF3, LOC122421476, ULK2, ULK1, LOC122427613, LOC122455265, VDAC1, MATR3, NUP98, LOC122421478, PFN1, TP53, SQSTM1, OPTN, ATF4, NUP205, PSMD12, SEH1L, PSMD13, ATP5MC2, PIK3R4, ATP5MC3, ITPR3, C9ORF72, LOC122424937, KLC4, PPP3R1, POM121C, NUP85, TPR, NUP88, NRBF2, XBP…	2430	461	10427	1.32172	0.0487256	0.00128075	0.000938729
GOTERM_CC_DIRECT	GO:0005802~trans-Golgi network	31	0.58579	0.000145974	SYS1, SLC66A2, FURIN, PCSK7, TGOLN2, C1H17ORF75, GGA1, ARL5B, CNST, RAB29, ARL5A, PLEKHJ1, YIPF4, YIPF5, GOLPH3L, ATP11B, ATP11A, FAM91A1, IGF2R, ELAPOR1, RAB32, GOLPH3, TRAPPC6A, RAB14, DOP1B, TRAPPC6B, DOP1A, YIPF6, RELCH, TBC1D23, PI4K2A	3619	68	15361	1.93501	0.095294	0.0166634	0.0163233
KEGG_PATHWAY	ccad03013:Nucleocytoplasmic transport	59	1.11489	0.000164754	AHCTF1, NUP188, CSE1L, LOC122424037, NXT2, IPO7, PNN, XPO1, XPO6, SUMO3, XPO5, SUMO2, KPNA6, KPNA4, KPNA2, TNPO1, UPF2, NDC1, NUP214, UPF1, NUP210, NCBP1, LOC122423495, NCBP2, THOC1, THOC3, THOC2, RANGAP1, THOC5, SENP2, THOC7, SRRM1, NUP93, EEF1A1, DDX19B, NUP54, NUP98, NUP205, SEH1L, RBM8A, AAAS, NXF1, POM121C, NUP85, TPR, LOC122421663, NUP88, NUP43, RAE1, RANBP2, LOC122432303, UBE2I, NUP155, PY…	2430	161	10427	1.57246	0.0563482	0.00144983	0.00106266
GOTERM_MF_DIRECT	GO:0003924~GTPase activity	104	1.96523	0.000166383	RAB3D, RAB44, RAB42, GNAT2, TUBB1, ARL16, RAB2A, RAB2B, ARL15, GTPBP2, GTPBP1, GEM, EEF1A1, RAB32, RRAGA, RRAGC, RAB36, RAB35, RABL3, ARL8B, RAB5B, RAB5C, ARL1, DNAJC27, GSPT2, GSPT1, RHOBTB2, RAP1B, RHOT2, CRACR2A, RHOT1, RAP1A, LOC122438655, RAB6A, EEFSEC, LOC122432303, RAB39B, GPN1, GNAO1, EIF2S3, RHEB, SRPRA, RAB5A, ARF3, HBS1L, ARF4, GFM1, ARF1, GFM2, LOC122424037, DIRAS2, SRP54, SEPTIN11, S…	3930	313	16442	1.39012	0.209391	0.0335618	0.0334429
GOTERM_CC_DIRECT	GO:0031201~SNARE complex	22	0.415722	0.000170034	SNAP47, STX12, STX16, STX7, STX18, GOSR1, CPLX1, BET1L, STX11, NAPG, VAMP8, VAMP7, VTI1A, STX5, VAMP1, STX4, STX3, SEC22B, VAMP2, VAMP3, VTI1B, BET1	3619	42	15361	2.22333	0.110106	0.0166634	0.0163233
KEGG_PATHWAY	ccad05170:Human immunodeficiency virus 1 infection	81	1.53061	0.000190518	LOC122429686, LOC122425045, TRADD, PIK3CD, CD3G, FASLG, CRKL, CASP9, PPP3CA, CASP8, AP1G1, AKT2, CFL1, RAC2, AKT1, RAC1, BTRC, MAP3K7, SKP1, PDIA3, MAP2K1, CHUK, FBXW11, PRKCB, TAP2, IRAK4, CDC25C, TNFRSF1B, LOC122429593, PIK3CA, TRAF6, LOC122443968, RAF1, CRK, CUL5, PXN, GNAI3, CXCR4, ITPR2, ITPR3, PIK3R1, SAMHD1, GNAI1, RELA, GNAI2, LOC122444227, MAPK9, GNG10, MAPK8, PPP3R1, LOC122443970, PLCG2…	2430	239	10427	1.45425	0.064869	0.00163566	0.00119887
KEGG_PATHWAY	ccad05022:Pathways of neurodegeneration - multiple diseases	169	3.1935	0.000207622	CHRM3, ARAF, PARK7, ZFYVE1, PSMD6, PSMD7, PSMD4, PSMD2, TUBB1, CAPN1, MAP3K5, MAP2K1, DAXX, CSNK2A1, PRKCB, LOC122427612, SDHD, SDHA, SDHB, ERN1, ATXN2L, LOC122435630, CSNK2B, VDAC3, VDAC2, LOC122421476, ULK2, ULK1, LOC122427613, LOC122455265, VDAC1, LOC122421478, RAF1, UBA52, SQSTM1, OPTN, ATF4, PSMD12, UBA7, PSMD13, LOC122435269, ATP5MC2, PIK3R4, ITPR2, ATP5MC3, ITPR3, PSEN1, C9ORF72, LOC122424…	2430	567	10427	1.27896	0.0704834	0.00174007	0.00127539
KEGG_PATHWAY	ccad00240:Pyrimidine metabolism	27	0.510204	0.000238055	HDDC2, CDA, NUDT2, NT5C2, TYMS, NT5C, NT5E, ENPP1, TK2, UPP1, LOC122434352, RRM1, ENTPD4, ENTPD5, NME2, CTPS2, NME3, DCK, DHODH, DCTD, UCK2, UCK1, NME6, DPYD, CMPK1, UMPS, DCTPP1	2430	58	10427	1.99751	0.0803897	0.00194873	0.00142833
KEGG_PATHWAY	ccad05220:Chronic myeloid leukemia	35	0.661376	0.000245951	RB1, HDAC2, CDKN1A, CTBP1, SHC1, HDAC1, ARAF, PIK3CD, LOC122427080, PIK3R1, RELA, CRKL, MYC, AKT2, ABL1, MAPK1, AKT1, BAK1, MAPK3, MAP2K1, SMAD3, TGFB1, CHUK, BAD, PTPN11, TGFBR2, RUNX1, PIK3CA, CDK4, BAX, KRAS, RAF1, TP53, CRK, LOC122441627	2430	83	10427	1.80944	0.0829428	0.00196761	0.00144217
GOTERM_BP_DIRECT	GO:0006468~protein phosphorylation	133	2.51323	0.00027321	TRIO, ARAF, TESK1, BUB1B, RPS6KA4, RPS6KA3, STK10, AKT2, CHEK2, CDK20, AKT1, NEK1, NEK2, NEK3, MAP3K7, MAP3K4, STK32C, PSKH1, MAP3K5, MAP2K4, MAP2K1, CDKL5, CSNK2A1, DAPK1, PRKCB, PRKCD, CASK, LMTK2, LOC122441383, NRBP1, ERN1, MELK, SIK3, TSSK6, TSSK3, PRKD1, SIK2, TNIK, TSSK4, RAF1, TRIB2, EPHA2, PKDCC, PIK3R4, PKMYT1, NUAK2, GRK2, GRK5, ABL1, MAP3K20, TRPM7, RIPK1, NEK9, PLK3, MLKL, NEK4, EIF2A…	3832	421	15999	1.31898	0.453162	0.156273	0.156131
KEGG_PATHWAY	ccad05167:Kaposi sarcoma-associated herpesvirus infection	75	1.41723	0.000276075	RB1, LOC122429686, LOC122425045, CDKN1A, LOC122425049, TRADD, PIK3CD, LOC122428192, PIK3CG, CASP9, PPP3CA, PREX1, MAP1LC3B, CASP8, MYC, AKT2, AKT1, CCR8, RAC1, JAK2, CCR4, CCR3, JAK1, MAP2K4, LOC122429597, MAP2K1, CHUK, SYK, IFNGR1, TYK2, LOC122429593, LOC122429592, CD200R1, PIK3CA, IRF7, PIK3C3, IL6ST, RAF1, TP53, UBA52, TLR3, IFNAR1, LOC122429940, BECN1, SRC, TCF7, ITPR2, ITPR3, PIK3R1, HIF1A, …	2430	220	10427	1.46282	0.0926182	0.00215952	0.00158283
GOTERM_BP_DIRECT	GO:0006457~protein folding	39	0.736961	0.000283103	LOC122432636, HSP90AB1, HSPA4L, CWC27, NUDCD3, HSPH1, GRPEL2, CDC37L1, QSOX1, CCT8, QSOX2, CCT4, NKTR, PDIA3, RANBP2, CCT2, TRAP1, PPIL1, PPIL2, HSPA4, PTGES3, PDIA5, CLPX, PDRG1, PDIA4, CCT6A, DNAJA3, TCP1, PTGES3L, PFDN1, PPIH, PFDN2, P4HB, PPIG, PPIL3, PPIB, PFDN5, PPIA, PFDN6	3832	94	15999	1.73222	0.464987	0.156273	0.156131
KEGG_PATHWAY	ccad05210:Colorectal cancer	40	0.755858	0.0003037	RALA, CDKN1A, RALB, TCF7, ARAF, PIK3CD, TGFA, PIK3R1, CASP9, MAPK9, MAPK8, MYC, AKT2, RAC2, MAPK1, AKT1, BAK1, RAC1, MAPK3, APPL1, MAP2K1, SMAD3, TGFB1, BAD, AXIN1, AXIN2, MLH1, RHOA, TGFBR2, MSH6, PIK3CA, APC, MSH2, MSH3, BCL2, BAX, BIRC5, KRAS, RAF1, TP53	2430	100	10427	1.71638	0.101401	0.00225854	0.00165541
KEGG_PATHWAY	ccad04658:Th1 and Th2 cell differentiation	40	0.755858	0.0003037	NOTCH2, LOC122429366, NOTCH1, MAML1, LOC122429106, CD3G, IL2RG, RELA, LOC122444227, MAPK9, PPP3CA, PPP3R1, MAPK8, TBX21, MAPK1, LOC122429902, PLCG1, JAK2, MAPK3, JAK1, LOC122429972, IL4R, CHUK, STAT1, IFNGR1, IFNGR2, NFATC3, NFATC2, LOC122441383, TYK2, MAPK14, RUNX3, CD4, MAF, LCK, IL2RB, PRKCQ, NFKBIE, LAT, LOC122441627	2430	100	10427	1.71638	0.101401	0.00225854	0.00165541
KEGG_PATHWAY	ccad05162:Measles	58	1.09599	0.000314399	TRADD, LOC122423465, PIK3CD, TNFAIP3, LOC122428193, CD3G, FASLG, IFIH1, CASP9, CCND3, CASP8, AKT2, RACK1, AKT1, MAP3K7, JAK1, CSNK2A1, CHUK, TYK2, IRAK4, PIK3CA, CCNE1, TRAF6, CSNK2B, IRF7, LOC122430140, CD46, TP53, IFNAR1, LOC122441627, LOC122430139, PIK3R1, IL2RG, RCHY1, RELA, LOC122444227, MAPK9, MAPK8, BAK1, FADD, BID, LOC122452376, HSPA8, STAT1, BAD, EIF2AK1, STAT2, STAT3, EIF2AK3, MSN, CDK4…	2430	161	10427	1.54581	0.10478	0.00225854	0.00165541
KEGG_PATHWAY	ccad04210:Apoptosis	58	1.09599	0.000314399	TRADD, PIK3CD, CTSW, FASLG, ACTB, LMNB1, CASP9, PIDD1, TUBA1B, CTSO, CASP7, CASP8, AIFM1, CASP6, AKT2, AKT1, CAPN1, CTSD, MAP3K5, DAXX, MAP2K1, PARP4, PARP1, CHUK, LOC122427612, TRAF1, ERN1, PIK3CA, LOC122435630, BIRC5, LOC122427613, RAF1, TP53, BIRC3, ATF4, ITPR2, ITPR3, PIK3R1, RELA, MAPK9, MAPK8, MAPK1, RIPK1, BAK1, FADD, BID, MAPK3, MCL1, LOC122426544, BAD, LOC122426664, EIF2AK3, PTPN13, BCL2…	2430	161	10427	1.54581	0.10478	0.00225854	0.00165541
KEGG_PATHWAY	ccad04370:VEGF signaling pathway	27	0.510204	0.000332312	SRC, PXN, HSPB1, PIK3CD, PIK3R1, CASP9, CDC42, PPP3CA, PPP3R1, AKT2, PLCG2, RAC2, MAPK1, AKT1, PLCG1, RAC1, MAPK3, MAP2K1, SPHK2, BAD, PRKCB, NFATC2, MAPK14, PTK2, PIK3CA, KRAS, RAF1	2430	59	10427	1.96365	0.110409	0.00233948	0.00171473
KEGG_PATHWAY	ccad04919:Thyroid hormone signaling pathway	47	0.888133	0.000355389	NOTCH2, HDAC2, NOTCH1, SRC, HDAC1, SLC2A1, ATP2A2, PIK3CD, LOC122427080, PIK3R1, HIF1A, FOXO1, ACTB, MED17, SLC9A1, MED12, CASP9, MED13, MED30, SIN3A, MYC, AKT2, PLCG2, MAPK1, AKT1, ITGAV, PLCG1, PRKACB, MAPK3, MAP2K1, STAT1, BAD, PRKCB, NCOA3, TSC2, SLC16A10, KAT2B, PFKL, PLCB3, PLCB4, TBC1D4, PIK3CA, RHEB, KRAS, RAF1, TP53, PLCD1	2430	124	10427	1.62641	0.117608	0.00245288	0.00179785
GOTERM_CC_DIRECT	GO:0000932~P-body	23	0.434618	0.000398717	SAMD4A, PNRC1, PATL1, LSM2, PNRC2, PAN2, EDC4, CNOT7, PAN3, LSM6, BTBD1, CNOT1, CNOT2, CNOT3, POLR2G, CNOT8, CNOT9, DCPS, LSM14A, TNRC6A, TNRC6B, APOBEC3B, DIS3L2	3619	47	15361	2.07712	0.239344	0.0341899	0.0334922
GOTERM_BP_DIRECT	GO:0006298~mismatch repair	11	0.207861	0.000545507	MSH6, PCNA, RNASEH2A, MSH2, MSH3, EXO1, MSH5, PMS2, XPC, MLH1, MLH3	3832	15	15999	3.06174	0.700414	0.240896	0.240678
KEGG_PATHWAY	ccad05161:Hepatitis B	65	1.22827	0.000566037	RB1, CDKN1A, DDX3X, YWHAB, ARAF, PIK3CD, FASLG, IFIH1, CASP9, CASP8, MYC, AKT2, CREB3L2, AKT1, JAK2, MAP3K7, JAK1, MAP2K4, MAP2K1, CHUK, ATP6AP1, PRKCB, TYK2, IRAK4, YWHAZ, HSPG2, TGFBR2, PIK3CA, CCNE1, TRAF6, IRF7, VDAC3, BIRC5, RAF1, TP53, TLR3, IFNAR1, LOC122441627, ATF4, PCNA, ATF6B, SRC, PIK3R1, RELA, MAPK9, MAPK8, PTK2B, MAPK1, FADD, BID, MAPK3, SMAD3, TGFB1, STAT1, BAD, STAT2, STAT3, NFATC…	2430	189	10427	1.47572	0.180697	0.00383163	0.00280841
KEGG_PATHWAY	ccad05200:Pathways in cancer	165	3.11791	0.000649715	RB1, SPI1, ARAF, ETS1, CRKL, CCND3, RASSF5, MYC, AKT2, PIM1, AKT1, PIM2, PRKACB, IL13RA1, SKP1, RALBP1, MAP2K1, IL4R, DAPK1, TPM3, PRKCB, F2R, FLT3LG, RUNX1, EML4, MSH6, ADCY9, MSH2, CCNE1, MSH3, IL6ST, RAF1, TP53, IFNAR1, NOTCH2, NOTCH1, CTBP1, EPAS1, TCF7, CUL2, LOC122449754, TGFA, LOC122427080, PIK3R1, PLD1, RASGRP1, HIF1A, LOC122449871, FOXO1, RASGRP3, GNG10, TERT, TPR, ABL1, PLCG2, PLCG1, FA…	2430	564	10427	1.25533	0.204492	0.00431509	0.00316276
KEGG_PATHWAY	ccad04012:ErbB signaling pathway	35	0.661376	0.000689517	CAMK2D, CDKN1A, SHC1, SRC, ARAF, PIK3CD, TGFA, PIK3R1, CRKL, MAPK9, MAPK8, MYC, AKT2, PLCG2, EIF4EBP1, ABL1, MAPK1, AKT1, PLCG1, PAK3, PAK2, MAPK3, NCK1, MAP2K4, MAP2K1, BAD, PRKCB, NRG1, PTK2, PIK3CA, KRAS, RAF1, CRK, HBEGF, LOC122441627	2430	87	10427	1.72624	0.215567	0.00449463	0.00329436
KEGG_PATHWAY	ccad04152:AMPK signaling pathway	46	0.869237	0.000709685	PFKFB3, CAB39, CAB39L, PRKAG1, PIK3CD, PPP2R2A, PIK3R1, FOXO3, ELAVL1, FOXO1, PPP2CA, LIPE, GYS1, PPP2R1A, PPP2R5E, AKT2, CREB3L2, EIF4EBP1, AKT1, MAP3K7, RAB8A, RAB2A, SREBF1, CPT1A, PRKAB2, STRADA, PPP2R5B, TSC2, PPP2R5A, PPP2R5D, TSC1, PRKAB1, SIRT1, CPT1B, RAB11B, RAB10, TBC1D1, PFKL, PIK3CA, RAB14, SCD, RHEB, FASN, PPARG, ULK1, FBP1	2430	124	10427	1.5918	0.22112	0.00454199	0.00332907
KEGG_PATHWAY	ccad04110:Cell cycle	61	1.15268	0.000942042	YWHAE, RB1, CDKN1A, MCM7, YWHAB, BUB1B, SMC3, CDC14A, CCND3, CDC23, PPP2R5E, PPP2R1A, MYC, CHEK2, CDC27, YWHAG, SKP1, DDX11, ATRX, PPP2R5B, PPP2R5A, PPP2R5D, ESCO2, KNL1, CDC25C, SMC1A, YWHAZ, CDC25A, SGO1, MAU2, TFDP1, RBL1, TFDP2, ESPL1, CCNE1, ANAPC4, MCM6, TP53, ANAPC1, MAD1L1, HDAC2, PCNA, HDAC1, PRKDC, LOC122427080, PKMYT1, PPP2CA, RAD21, ABL1, BUB3, ZBTB17, CDT1, CDKN2B, SMAD3, TGFB1, CDC7…	2430	178	10427	1.47049	0.282337	0.0059214	0.00434012
GOTERM_MF_DIRECT	GO:0046872~metal ion binding	68	1.28496	0.000943581	PLEKHF2, PPP1R10, LOC122435446, ZFYVE1, ZC3H12D, ZFYVE28, ZC3H12C, FYCO1, ZFYVE26, ZFYVE27, ZC3H7A, ZC3H7B, EXO1, PMPCB, ENPP1, TRMT44, ZGPAT, MCCC1, RC3H1, RBSN, RC3H2, LOC122450618, TGFBR2, RUFY1, ARMC1, ZFYVE19, LOC122420101, PITPNM2, WDFY1, WDFY3, MOCS1, GART, RBM22, IDO1, GLO1, MTMR4, FGD1, ZFP36L2, ZFP36L1, FGD3, LOC122424937, FGD4, NT5E, UNK, RNF213, FGD6, DPH3, LONRF3, MBNL3, ZC3H13, LONR…	3930	198	16442	1.43683	0.736306	0.137507	0.13702
GOTERM_MF_DIRECT	GO:0004843~cysteine-type deubiquitinase activity	38	0.718065	0.000952105	USP35, OTUD4, USP14, USP36, OTUD5, USP37, MINDY3, USP16, USP10, USP11, TNFAIP3, OTUD7B, USP19, ATXN3, UCHL1, OTUD6B, USP1, USP50, USP30, USP24, USP8, USP48, USP7, USP49, USP5, USP20, USP42, LOC122423793, USP21, USP4, USP22, USP3, USP45, OTULIN, USP40, BAP1, OTULINL, OTUB1	3930	96	16442	1.65605	0.739464	0.137507	0.13702
KEGG_PATHWAY	ccad03060:Protein export	20	0.377929	0.000978956	SRP19, HSPA5, SGTA, SRP54, SRP68, BAG6, SEC61A1, SPCS3, OXA1L, LOC122445349, SPCS2, SPCS1, SRPRA, TMEM208, SEC61B, SEC62, SEC11A, SEC11C, SEC63, GET4	2430	41	10427	2.09314	0.291611	0.00604548	0.00443106
GOTERM_BP_DIRECT	GO:0060337~type I interferon-mediated signaling pathway	7	0.132275	0.00104589	LOC122431080, STAT1, LOC122431078, STAT2, LOC122431079, LOC122430804, LOC122431250	3832	7	15999	4.1751	0.900896	0.384888	0.38454
GOTERM_CC_DIRECT	GO:0012505~endomembrane system	26	0.491308	0.00104751	AGPAT5, LRPAP1, STX12, STX16, LCLAT1, STX11, AGPAT4, PGRMC1, ODR4, CNPY4, ABHD16A, CLPTM1, STX5, BPNT2, STX4, STX3, WLS, RNF24, STX7, NRBP1, TMEM199, VMP1, RNF145, RABL3, CLPTM1L, TMCC1	3619	59	15361	1.87048	0.512745	0.0779856	0.076394
GOTERM_MF_DIRECT	GO:0004715~non-membrane spanning protein tyrosine kinase activity	16	0.302343	0.0010777	ITK, PKDCC, SYK, SRC, LOC122441383, TYK2, BMX, FGR, TEC, LCK, FES, ABL1, BTK, FYN, JAK2, JAK1	3930	29	16442	2.30826	0.781843	0.137507	0.13702
GOTERM_MF_DIRECT	GO:0032266~phosphatidylinositol-3-phosphate binding	11	0.207861	0.00112321	ZFYVE26, SNX27, WDR45B, ZFYVE19, PLEKHA5, ATG2A, SNX12, WIPI1, WIPI2, VPS36, ATG2B	3930	16	16442	2.8763	0.795434	0.137507	0.13702
GOTERM_CC_DIRECT	GO:0032040~small-subunit processome	20	0.377929	0.00113682	NOP56, UTP25, NOP58, UTP6, UTP11, UTP4, KRR1, IMP3, WDR3, HEATR1, IMP4, PWP2, UTP18, NOL6, RRP9, PDCD11, MPHOSPH10, NOL10, UTP14A, DCAF13	3619	41	15361	2.07051	0.541731	0.0779856	0.076394
GOTERM_MF_DIRECT	GO:0003723~RNA binding	173	3.26909	0.00116862	RPL4, RAMAC, RPL3, GPATCH1, MSI2, RPL10A, YARS2, VIRMA, RPL7, RDM1, RPS16, RPS18, CWC22, PAPOLA, HABP4, LOC122433188, PAPOLB, RPL37, SEC63, DDX17, ZBP1, NOM1, PCID2, WDR75, DICER1, ZCRB1, RPP25L, SRRM1, ATXN2L, DHX40, XRN1, RPL7L1, MRTO4, XRN2, SRSF3, LOC122423898, MATR3, RPL26, GEMIN7, RPP25, EIF1B, SNRPB, ANKRD17, LOC122429783, RNASEH2A, LOC122434456, EIF5A2, HTATSF1, NOP9, CTIF, DHX32, ATXN1, …	3930	586	16442	1.23512	0.808152	0.137507	0.13702
KEGG_PATHWAY	ccad04070:Phosphatidylinositol signaling system	38	0.718065	0.00135948	MTMR2, INPP1, MTMR14, DGKA, MTMR8, PTEN, PIK3CD, ITPR2, ITPR3, PIK3R1, MTMR4, PIK3C2A, MTMR6, PIP4P1, PPIP5K1, INPP5F, IMPA2, PLCG2, PIP4K2A, PIP5K1A, BPNT2, PIP4K2C, PLCG1, PIP5K1C, IP6K1, CDIPT, PRKCB, SACM1L, ITPK1, SYNJ2, PLCB3, PLCB4, PIK3CA, PIK3C3, PI4KB, PLCD1, PI4K2A, CDS2	2430	100	10427	1.63056	0.380512	0.00825062	0.00604733
GOTERM_CC_DIRECT	GO:0005741~mitochondrial outer membrane	25	0.472411	0.00145514	LOC122426596, TOMM40, CISD2, LOC122454429, MIEF1, MFF, TOMM20, AGPAT4, FUNDC2, RHOT2, RHOT1, FUNDC1, MFN1, BAK1, MCL1, SLC25A46, ATAD1, BNIP3L, TOMM40L, BCL2, VDAC3, VDAC2, BAX, VDAC1, LPIN1	3619	57	15361	1.86164	0.631735	0.0907479	0.0888959
GOTERM_MF_DIRECT	GO:0030515~snoRNA binding	10	0.188964	0.0015203	NOP56, UTP6, NOP58, IMP3, WDR3, HEATR1, IMP4, NUDT16, NUDT16L1, RRP9	3930	14	16442	2.98837	0.883316	0.165127	0.164543
KEGG_PATHWAY	ccad04670:Leukocyte transendothelial migration	45	0.85034	0.00164764	ITGB1, ITK, ITGAM, ROCK1, LOC122435269, PXN, GNAI3, CXCR4, PIK3CD, CD99L2, PIK3R1, ITGAL, ARHGAP5, CLDN1, ACTB, GNAI1, GNAI2, RAP1B, CDC42, RAP1A, RASSF5, PLCG2, RAC2, PTK2B, LOC122420817, PLCG1, RAC1, LOC122425824, JAM2, ITGA4, PRKCB, MSN, PTPN11, MAPK14, RHOA, VAV1, PTK2, CLDN15, PIK3CA, CLDN12, PECAM1, EZR, RAPGEF3, VCL, RAPGEF4	2430	125	10427	1.54474	0.440353	0.00983	0.00720494
GOTERM_BP_DIRECT	GO:0000398~mRNA splicing, via spliceosome	47	0.888133	0.00179731	LOC122430499, SF3B5, SF3B2, SF3B3, LOC122430498, DDX23, RBM4B, RNPC3, HTATSF1, PRPF19, PRPF8, UBL5, SNRNP70, CWC22, LOC122432056, TXNL4A, RBM10, ZRSR2, AQR, LOC122432027, BUD31, YJU2, CDC5L, ZCRB1, CRNKL1, CDC40, LSM2, LSM8, XAB2, GCFC2, PRPF4, SNW1, PRPF6, LSM6, PHF5A, MFAP1, NOVA2, CWF19L1, SRSF3, LOC122423898, PRPF31, RNPS1, SNRNP25, PAXBP1, YJU2B, SNRPA, SNRPB	3832	129	15999	1.52116	0.981199	0.566924	0.566411
GOTERM_CC_DIRECT	GO:0000139~Golgi membrane	39	0.736961	0.00193494	SYS1, SAMD8, SLC35B1, PGAP4, FUT11, GOSR1, FURIN, SGMS2, PCSK7, ATP2C1, GLG1, LMAN1, LOC122444868, GOLGA5, RAB42, C28H6ORF89, CUX1, MAN2A1, MAN1C1, PMEPA1, STX5, QSOX1, MAN1A1, QSOX2, MGAT2, SLC35A5, SLC35A3, HUWE1, RAB39B, CASD1, ZDHHC17, POMGNT1, RER1, MFNG, COPG1, SEC22B, ERGIC1, BLZF1, CHST2	3619	104	15361	1.5917	0.735166	0.110614	0.108356
KEGG_PATHWAY	ccad04064:NF-kappa B signaling pathway	40	0.755858	0.0021001	TRADD, TNFAIP3, LOC122428192, BCL10, TNFRSF11A, RELA, MALT1, RELB, TNFSF13B, LOC122444227, PIDD1, PLAU, PLCG2, RIPK1, PLCG1, ERC1, MAP3K7, UBE2I, PARP1, CSNK2A1, CHUK, SYK, IL1R1, PRKCB, LOC122441383, TRAF1, IRAK4, NFKB2, LCK, TRAF6, CSNK2B, BCL2, BTK, PRKCQ, ATM, TAB2, TAB1, CARD11, LAT, BIRC3	2430	109	10427	1.57466	0.522892	0.0123206	0.00903043
GOTERM_CC_DIRECT	GO:0005654~nucleoplasm	55	1.0393	0.00212213	RNF13, MAML1, NOC2L, TMEM92, RNF115, SPIN1, KPNA6, MACROD1, CHAMP1, KPNA4, NCOA5, PPP4R3A, PPP4R3B, ARID1A, ARID1B, RAD23B, TTI2, EMSY, RNF167, EID1, LOC122420346, SHQ1, AKIP1, RBM12B, PSME2, PRR13, HEMGN, RBM48, NUFIP2, NOLC1, DTX2, LIN9, CCDC106, PPM1G, TAF1D, MIER3, PCBP1, TASOR, PCBP2, SRSF11, TRIM45, TRMT10A, TRMT10B, TRMT10C, NICN1, STYX, NPM3, HNRNPAB, THAP11, HNRNPF, RNPS1, TNRC6A, SUGP2,…	3619	160	15361	1.45906	0.767142	0.111983	0.109698
GOTERM_BP_DIRECT	GO:0006303~double-strand break repair via nonhomologous end joining	11	0.207861	0.00218085	POLB, DCLRE1B, DCLRE1A, XRCC6, DCLRE1C, MRE11, POLM, PRKDC, XRCC1, DNTT, POLL	3832	17	15999	2.70154	0.991955	0.598492	0.59795
GOTERM_CC_DIRECT	GO:0005643~nuclear pore	18	0.340136	0.00229362	NUP214, RANBP2, RANBP1, NUP205, RANBP3, NUP155, NUP210, XPO7, AAAS, NUP93, POM121C, XPOT, LOC122442530, TPR, NUP54, NUP88, NUP98, RAE1	3619	37	15361	2.06491	0.79304	0.112387	0.110094
GOTERM_MF_DIRECT	GO:0016887~ATP hydrolysis activity	87	1.64399	0.00237384	HSP90AB1, MCM7, MCM8, NVL, LOC122423465, SRP54, LOC122420990, OLA1, ATP2A2, LOC122428193, CHD4, SMC3, ABCC10, NUBP1, SMC2, LOC122438231, RUVBL2, LOC122447237, ATP7A, RFC5, NSF, CCT2, ABCC4, MORC3, RFC2, ABCC6, TAP2, ATP11B, KIF23, WRNIP1, PEX1, ATP11A, SMC1A, LOC122447240, CLPX, VWA8, AFG3L2, RAD51D, PEX6, TCP1, LOC122430140, YME1L1, RAD54L2, ATP6V1A, LOC122430139, ABCB1, VPS4A, IGHMBP2, FIGNL2, …	3930	273	16442	1.33327	0.96512	0.239418	0.238571
GOTERM_BP_DIRECT	GO:0000422~autophagy of mitochondrion	15	0.283447	0.00243951	GABARAPL2, GABARAPL1, WDR45B, CISD2, WIPI1, WIPI2, FUNDC2, PINK1, MAP1LC3B, FUNDC1, RB1CC1, ATG2A, FBXO7, ATG7, ATG2B	3832	28	15999	2.23666	0.995463	0.598492	0.59795
GOTERM_MF_DIRECT	GO:0051787~misfolded protein binding	12	0.226757	0.00267416	BAG6, HSPA9, DNAJC3, HSPA8, LOC122430139, HSPA5, LOC122423465, LOC122430140, DERL1, DNAJB9, LOC122428193, HSPA13	3930	20	16442	2.51023	0.9772	0.251728	0.250837
GOTERM_CC_DIRECT	GO:0019898~extrinsic component of membrane	10	0.188964	0.00269144	LOC122443943, WDR45B, VPS13C, RB1CC1, VPS13D, ATG2A, VPS13A, WIPI1, WIPI2, ATG2B	3619	15	15361	2.8297	0.842577	0.123088	0.120576
KEGG_PATHWAY	ccad04142:Lysosome	49	0.925926	0.00271801	SCARB2, LOC122427221, CLTC, LOC122454606, LOC122454605, CTSW, NAGPA, LITAF, MFSD8, LAPTM4B, CTSO, GNPTAB, HYAL1, AP1G1, SMPD1, LAMP3, LOC122435840, IDS, GUSB, CTSD, HGSNAT, ARSA, ATP6AP1, ENTPD4, SLC11A1, NPC1, NPC2, ATP6V0D1, ATP6V0C, CLN5, AP3M2, CLN3, GGA1, SLC17A5, ATP6V0A2, AGA, ARSB, CD164, NAPSA, SORT1, FUCA2, LAPTM5, IGF2R, GALNS, DMXL1, DMXL2, PPT1, PPT2, LGMN	2430	142	10427	1.48068	0.616357	0.0156843	0.0114959
GOTERM_MF_DIRECT	GO:0004674~protein serine/threonine kinase activity	59	1.11489	0.00292624	SMG1, GSK3A, DYRK2, MAST4, TESK1, RPS6KA4, STK10, AKT2, CHEK2, PIM1, AKT1, PIM2, CSNK2A1, DAPK1, DYRK1A, DYRK1B, VRK1, IRAK4, OXSR1, MASTL, ERN1, GAK, MELK, LATS2, SIK3, TSSK6, FAM20C, ULK2, TSSK3, ULK1, PRKD1, SIK2, TSSK4, CSNK1G1, PIK3R4, PRKX, NUAK2, STK35, STK38, STK38L, LOC122423369, TRPM7, PAK3, PAK2, PLK3, CSNK1A1, RIOK3, PLK2, CDC7, HIPK1, HIPK3, PINK1, SNRK, WNK1, STK17A, WNK2, ATM, PKN1…	3930	174	16442	1.41862	0.984044	0.25824	0.257326
KEGG_PATHWAY	ccad04530:Tight junction	63	1.19048	0.00292742	ITGB1, PATJ, ARPC1B, PRKAG1, PPP2R2A, YBX3, CLDN1, ACTB, AMOT, TUBA1B, PPP2R1A, RAC1, PRKACB, LOC122431282, RAB8A, RAB8B, MAP3K5, ACTR3, ACTR2, LOC122424660, PRKAB2, LOC122427612, PRKCE, PRKAB1, RHOA, RUNX1, RAP2C, TIAM1, MYL6, CLDN15, CLDN12, LOC122427613, EZR, RAPGEF6, PCNA, ROCK1, SRC, WAS, NEDD4L, ARHGAP17, CD1E, PPP2CA, CDC42, MAPK9, MAPK8, PARD6B, RAP1A, WHAMM, LOC122425824, JAM2, LOC122426…	2430	193	10427	1.40067	0.643693	0.0166202	0.0121818
GOTERM_BP_DIRECT	GO:0000723~telomere maintenance	10	0.188964	0.00304221	RECQL4, BLM, RAD51D, XRCC6, MRE11, RIF1, PRKDC, NBN, ATR, ZNF365	3832	15	15999	2.7834	0.998806	0.671468	0.67086
GOTERM_MF_DIRECT	GO:0003714~transcription corepressor activity	35	0.661376	0.00337475	RERE, CTBP1, ATN1, NOC2L, SIN3B, TRIM28, SIN3A, MIER3, WDR5, SCAI, BEND6, TLE4, WWTR1, TLE3, CASP8AP2, LOC122452850, TLE2, SFMBT1, SFMBT2, PHF12, IRF2BP1, PARP9, CBFA2T2, TRERF1, CBFA2T3, CDYL2, TLE5, DRAP1, PARP10, EID1, LOC122420346, TBL1XR1, HSBP1L1, ZMYND11, RCOR1	3930	92	16442	1.59163	0.991547	0.280303	0.27931
GOTERM_CC_DIRECT	GO:0005794~Golgi apparatus	74	1.39834	0.00339017	GALNT12, GASK1B, ZDHHC6, ZDHHC7, BICD2, ARV1, GNPTAB, AP1G1, TMED2, GNPNAT1, SLC30A7, RAB2A, RAB2B, MMGT1, SLC30A5, GLCE, SLC35C2, ZDHHC16, ZDHHC15, TPST2, RNF144A, RAB32, HEATR5A, HEATR5B, GORASP2, FAM20B, FAM20C, OPTN, TMEM87A, CUL7, TMEM87B, LOC122452562, TMED10, PARM1, SLC35D2, ZDHHC23, ARL1, ZDHHC24, LOC122427080, ZDHHC21, SELENOK, CLCN3, SELENOI, SELENOH, C29H11ORF24, MGAT5, VTI1A, RAB29, D…	3619	232	15361	1.35386	0.902666	0.145353	0.142387
KEGG_PATHWAY	ccad04668:TNF signaling pathway	44	0.831444	0.00360113	ATF6B, TRADD, PIK3CD, TNFAIP3, LOC122428192, LOC122449214, PIK3R1, RELA, RPS6KA4, MAPK9, SOCS3, BAG4, CASP7, MAPK8, CASP8, AKT2, CREB3L2, MAPK1, AKT1, RIPK1, FADD, MAP3K7, MAPK3, MAP3K5, MAP2K4, MAP2K1, RIPK3, MLKL, CHUK, RHBDF2, TRAF1, MAPK14, TNFRSF1B, CXCL10, ADAM17, ITCH, PIK3CA, FRMD8, PGAM5, TAB2, TAB1, IL18R1, ATF4, BIRC3	2430	126	10427	1.49843	0.719136	0.0199638	0.0146326
KEGG_PATHWAY	ccad05213:Endometrial cancer	25	0.472411	0.00362978	CDKN1A, TCF7, ARAF, PTEN, PIK3CD, PIK3R1, FOXO3, CASP9, MYC, AKT2, MAPK1, AKT1, BAK1, MAPK3, MAP2K1, BAD, AXIN1, AXIN2, MLH1, PIK3CA, APC, BAX, KRAS, RAF1, TP53	2430	61	10427	1.75858	0.721965	0.0199638	0.0146326
GOTERM_MF_DIRECT	GO:0000049~tRNA binding	19	0.359033	0.00378919	TRMT10A, TRMT10B, PTCD1, TRMT10C, TYW5, KARS1, FARS2, TRMT9B, CTU2, YRDC, SARS1, DALRD3, SARS2, EIF2S3, XPOT, LOC122420650, IARS1, LOC122421547, EIF2A	3930	41	16442	1.93879	0.995301	0.297241	0.296188
GOTERM_BP_DIRECT	GO:0006511~ubiquitin-dependent protein catabolic process	44	0.831444	0.00379011	CUL9, CUL7, RNF13, UBE2D4, PSMD13, UBE2D2, UBE2D3, RNF8, NEDD4L, UBE3B, RCHY1, RNF5, PSMA7, HERC4, UCHL1, RNF115, RNF213, RNF114, ARIH2, RBBP6, LOC122429726, UBQLN4, UBE2H, NDFIP2, NDFIP1, ANKIB1, SMURF2, LOC122453866, SMURF1, RNF26, AMFR, FBXO10, FBXO11, CUL4A, RNF144A, RNF144B, RNF167, ITCH, PSMA4, NPLOC4, UBE2R2, NEDD4, RNF185, BAP1	3832	123	15999	1.49353	0.999772	0.671468	0.67086
GOTERM_BP_DIRECT	GO:0000184~nuclear-transcribed mRNA catabolic process, nonsense-mediated decay	11	0.207861	0.0038598	UPF2, UPF1, SMG1, NCBP1, DHX34, UPF3B, SMG7, PNRC1, SMG5, SMG6, PNRC2	3832	18	15999	2.55145	0.999805	0.671468	0.67086
KEGG_PATHWAY	ccad03430:Mismatch repair	13	0.245654	0.0038664	RFC5, PCNA, RFC2, RPA2, MLH1, MLH3, POLD3, MSH6, MSH2, MSH3, EXO1, POLD2, PMS2	2430	24	10427	2.32426	0.744264	0.020938	0.0153466
GOTERM_BP_DIRECT	GO:0016192~vesicle-mediated transport	36	0.680272	0.00396903	ARF3, ARF4, STX12, ARF1, STXBP3, STX16, LOC122423465, TGFBRAP1, STXBP2, ARL1, LOC122428193, HSPA13, GGA1, LOC122444868, ARL5B, ZFYVE27, SCFD2, VPS11, RAB29, ARL5A, VPS39, HSPA8, YIPF1, STX7, CCZ1, LOC122445288, VAMP8, CNIH1, VAMP1, RIN3, SFT2D2, RIN2, VAMP2, VAMP3, ARF6, MON1B	3832	96	15999	1.56566	0.999847	0.671468	0.67086
GOTERM_CC_DIRECT	GO:0071013~catalytic step 2 spliceosome	25	0.472411	0.00425429	ISY1, SF3B2, DDX23, CWC27, PRPF8, PNN, DHX35, CWC22, DHX16, SF3A1, AQR, PPIL1, SF3A2, PPIL2, LOC122423495, CDC40, LSM2, PRPF6, PHF5A, SYF2, FRG1, NRDE2, PPIL3, LOC122451084, SNRPB	3619	61	15361	1.73957	0.946318	0.164331	0.160978
GOTERM_MF_DIRECT	GO:0031072~heat shock protein binding	12	0.226757	0.00441265	SPN, HSPA9, HSPA8, LOC122430139, HSPA5, LOC122423465, DNAJA3, LOC122430140, TOMM34, CDC37L1, LOC122428193, HSPA13	3930	21	16442	2.39069	0.998059	0.327929	0.326768
GOTERM_CC_DIRECT	GO:0005694~chromosome	14	0.26455	0.00449927	ZNF276, BLM, SETD2, MAZ, TOP3A, HP1BP3, SMC3, SMC1A, SMC2, RECQL4, RECQL5, TOP1, TRIP13, RHNO1	3619	27	15361	2.20087	0.954655	0.164331	0.160978
GOTERM_CC_DIRECT	GO:0005730~nucleolus	53	1.00151	0.00455145	PINX1, LOC122454607, NOC2L, RRP8, CDC14A, WDR43, RDM1, UTP14A, RPS13, NOM1, UTP11, NSUN5, WDR74, WDR75, IMP4, URB1, FRG1, MRTO4, CCDC86, TOP1, UTP25, RPS19BP1, DHX9, NIP7, PRKRIP1, NOLC1, SDAD1, NOP9, DEDD2, EXOSC5, RNF213, C28H6ORF89, PDCD11, DHX33, PES1, SURF6, BRIX1, LLPH, LYAR, DCAF13, KLHDC3, NIFK, KRR1, UPF3B, NOC3L, NPM3, RCL1, LSM6, GNL3L, KATNBL1, NOL10, NOL12, NOP53	3619	158	15361	1.4238	0.956257	0.164331	0.160978
GOTERM_BP_DIRECT	GO:0006355~regulation of DNA-templated transcription	103	1.94633	0.0047612	ZNF571, ZMYND8, LOC122420030, CCAR2, RPS6KA4, KAT5, POGZ, MYB, SCMH1, KAT8, KAT7, MTERF1, ZNF565, TLE4, TLE3, ZNF560, TLE2, SFMBT1, ZNF282, SFMBT2, EMSY, TLE5, SAP30, HCFC1, MORF4L1, THAP7, SAP25, LOC122420388, ZNF319, ZNF317, LOC122440459, LRIF1, NOTCH2, L3MBTL3, NOTCH1, L3MBTL2, LOC122421383, CREBL2, ZBTB4, TAF5L, MBTD1, LOC122420579, SBNO1, ZKSCAN5, ZNF420, LOC122420614, ESRRA, LOC122432942, F…	3832	338	15999	1.2723	0.999974	0.671468	0.67086
GOTERM_BP_DIRECT	GO:0016579~protein deubiquitination	30	0.566893	0.00489914	USP35, OTUD4, USP14, USP36, OTUD5, USP37, USP10, USP11, USP19, ATXN3, UCHL1, OTUD6B, USP1, USP30, USP24, USP48, USP7, USP49, USP5, USP20, USP42, LOC122423793, USP21, USP4, DESI2, USP22, USP3, USP45, USP40, BAP1	3832	77	15999	1.62666	0.999981	0.671468	0.67086
GOTERM_MF_DIRECT	GO:0140662~ATP-dependent protein folding chaperone	19	0.359033	0.00517132	HSPA9, TRAP1, CCT2, HSPA8, LOC122430139, HSP90AB1, HSPA5, HSPA4, LOC122423465, HSPA4L, LOC122428193, HSPA13, CLPX, CCT6A, HSPH1, TCP1, LOC122430140, CCT8, CCT4	3930	42	16442	1.89263	0.999338	0.365095	0.363803
GOTERM_BP_DIRECT	GO:0006364~rRNA processing	19	0.359033	0.00529048	UTP11, IMP3, PIH1D1, POP4, RRP1, IMP4, PWP1, RBFA, UTP18, NOL6, YBEY, PDCD11, MRTO4, MPHOSPH10, PIN4, BRIX1, UTP14A, LYAR, NOP53	3832	42	15999	1.88874	0.999992	0.671468	0.67086
KEGG_PATHWAY	ccad05223:Non-small cell lung cancer	29	0.547997	0.00530124	RB1, CDKN1A, ARAF, PIK3CD, TGFA, PIK3R1, FOXO3, CASP9, AKT2, RASSF5, PLCG2, MAPK1, AKT1, BAK1, PLCG1, MAPK3, MAP2K1, BAD, PRKCB, STAT3, EML4, PIK3CA, CDK4, BAX, KRAS, RAF1, MET, TP53, LOC122441627	2430	76	10427	1.63733	0.84603	0.0282733	0.020723
GOTERM_BP_DIRECT	GO:0007264~small GTPase-mediated signal transduction	25	0.472411	0.00531933	BCAR3, DOCK5, DOCK3, DOCK9, RHOBTB2, DOCK10, CDC42, RHOT2, RHOT1, RAC2, RAC1, RALBP1, SH2D3C, RHOG, LOC122445288, RHOF, RHOC, RHOA, RHOB, TIAM2, TIAM1, ARHGAP31, RABIF, RHEB, DOCK2	3832	61	15999	1.71111	0.999992	0.671468	0.67086
GOTERM_BP_DIRECT	GO:0042147~retrograde transport, endosome to Golgi	17	0.32124	0.00547393	TMEM87A, TMEM87B, SLC66A2, RCSD1, BET1L, HEATR5A, HEATR5B, VPS53, VTI1A, VPS54, RAB9A, VPS35, TBC1D23, WASHC1, SNX8, PLEKHJ1, VTI1B	3832	36	15999	1.97158	0.999995	0.671468	0.67086
KEGG_PATHWAY	ccad04211:Longevity regulating pathway	33	0.623583	0.00561118	ATF6B, EHMT2, PRKAG1, ADCY3, PIK3CD, PIK3R1, FOXO3, FOXO1, RELA, SESN1, RB1CC1, AKT2, CREB3L2, EIF4EBP1, AKT1, PRKACB, APPL1, PRKAB2, TSC2, TSC1, SOD2, PRKAB1, SIRT1, ADCY9, PIK3CA, RHEB, CAMK4, BAX, KRAS, PPARG, ULK1, TP53, ATF4	2430	90	10427	1.57335	0.862027	0.0293338	0.0215003
KEGG_PATHWAY	ccad04933:AGE-RAGE signaling pathway in diabetic complications	37	0.699169	0.00566676	LOC122435269, PIK3CD, LOC122449214, PIK3R1, FOXO1, RELA, CDC42, THBD, MAPK9, MAPK8, AKT2, PIM1, PLCG2, MAPK1, AKT1, PLCG1, RAC1, JAK2, MAPK3, SMAD3, TGFB1, STAT1, PRKCB, PRKCE, STAT3, PRKCD, MAPK14, TGFBR2, PLCB3, PLCB4, PIK3CA, CDK4, BCL2, BAX, KRAS, PLCD1, LOC122441627	2430	104	10427	1.52659	0.864715	0.0293338	0.0215003
KEGG_PATHWAY	ccad05100:Bacterial invasion of epithelial cells	32	0.604686	0.00612259	ITGB1, SHC1, SRC, ARPC1B, PXN, CLTC, PIK3CD, WASL, PIK3R1, SEPTIN11, ACTB, CRKL, CDC42, RAC1, WASF2, ACTR3, ACTR2, LOC122424660, SEPTIN2, RHOG, SEPTIN6, ARPC4, ARPC5, SEPTIN9, RHOA, PTK2, PIK3CA, ELMO3, ITGA5, MET, CRK, VCL	2430	87	10427	1.57828	0.884879	0.0302882	0.0221999
KEGG_PATHWAY	ccad01524:Platinum drug resistance	32	0.604686	0.00612259	TOP2B, CDKN1A, PIK3CD, LOC122427080, FASLG, PIK3R1, BRCA1, CASP9, CASP8, AKT2, MAPK1, AKT1, BAK1, FADD, BID, ATP7A, POLH, MAPK3, MAP3K5, SLC31A1, BAD, MLH1, MSH6, PIK3CA, MSH2, MSH3, BCL2, BAX, BIRC5, ATM, TP53, BIRC3	2430	87	10427	1.57828	0.884879	0.0302882	0.0221999
KEGG_PATHWAY	ccad04914:Progesterone-mediated oocyte maturation	34	0.642479	0.00618889	HSP90AB1, PDE3B, ARAF, GNAI3, ADCY3, PIK3CD, PIK3R1, PKMYT1, GNAI1, GNAI2, STK10, RPS6KA3, MAPK9, MAPK8, CDC23, AKT2, CDC27, MAPK1, AKT1, PRKACB, MAPK3, MAP2K1, KIF22, CDC25C, MAPK14, CDC25A, CPEB1, ADCY9, PIK3CA, ANAPC4, KRAS, RAF1, ANAPC1, MAD1L1	2430	94	10427	1.55204	0.887551	0.0302882	0.0221999
KEGG_PATHWAY	ccad04068:FoxO signaling pathway	45	0.85034	0.00619532	CDKN1A, PRKAG1, ARAF, PTEN, PIK3CD, LOC122427080, FASLG, FOXO4, PIK3R1, FOXO3, FOXO1, MAPK9, MAPK8, AKT2, S1PR1, MAPK1, AKT1, LOC122423369, S1PR4, MAPK3, PLK3, GABARAPL2, CDKN2B, GABARAPL1, PRKAB2, MAP2K1, USP7, SMAD3, TGFB1, CHUK, HOMER2, PRMT1, PLK2, STAT3, MAPK14, SOD2, PRKAB1, SIRT1, TGFBR2, PIK3CA, CCNG2, KRAS, ATM, IL7R, RAF1	2430	133	10427	1.45182	0.887807	0.0302882	0.0221999
KEGG_PATHWAY	ccad04072:Phospholipase D signaling pathway	51	0.963719	0.00643804	ARF1, LOC122426699, DGKA, PIK3CD, PIK3CG, AKT2, AKT1, MAP2K1, SYK, SPHK2, F2R, TSC2, TSC1, RHOA, PLCB3, PLCB4, ADCY9, PIK3CA, KIT, RAF1, RAPGEF3, ARF6, RAPGEF4, AGPAT5, RALA, RALB, SHC1, ADCY3, PIK3R1, AGPAT1, PLD1, AGPAT4, PIK3R5, GNA13, CYTH4, GNA12, PLCG2, PTK2B, MAPK1, PIP5K1A, FYN, PLCG1, PIP5K1C, CYTH1, MAPK3, PTPN11, LPAR5, RHEB, LPAR6, KRAS, LOC122426789	2430	155	10427	1.41186	0.89705	0.0310437	0.0227536
KEGG_PATHWAY	ccad05164:Influenza A	61	1.15268	0.00662331	CIITA, LOC122429366, TRADD, PIK3CD, LOC122449214, FASLG, NXT2, ACTB, IFIH1, CASP9, CCND3, CASP8, XPO1, AKT2, KPNA6, AKT1, JAK2, KPNA2, PRSS2, JAK1, MAP2K1, CHUK, RSAD2, PRKCB, IFNGR1, IFNGR2, TYK2, IRAK4, DNAJC3, HNRNPUL1, PIK3CA, IRF7, VDAC1, NUP98, SLC25A5, RAF1, SLC25A4, TLR3, IFNAR1, SLC25A6, RNASEL, LOC122429106, PIK3R1, RELA, NXF1, SOCS3, MAPK1, LOC122429902, BAK1, FADD, BID, RAE1, MAPK3, C…	2430	192	10427	1.36327	0.903592	0.0315055	0.0230921
GOTERM_CC_DIRECT	GO:0005765~lysosomal membrane	25	0.472411	0.00683217	SLC46A3, ATP6V1A, SPPL2A, WDR41, PSEN1, CLN5, MFSD8, LAPTM4B, ZFYVE26, PIP4P1, LOC122429902, SLC15A3, ATP6V1C1, VPS16, HGSNAT, LAPTM5, AP5B1, MCOLN2, TPCN1, RMC1, CLCN7, TMEM79, ATP6V0D1, PI4K2A, ARL8B	3619	63	15361	1.68434	0.990932	0.234343	0.229561
GOTERM_MF_DIRECT	GO:0017056~structural constituent of nuclear pore	12	0.226757	0.00693968	NUP214, NUP93, NUP205, NUP155, POM121C, NUP188, NUP85, LOC122442530, TPR, NUP54, NUP88, NUP98	3930	22	16442	2.28203	0.999946	0.466611	0.464959
GOTERM_BP_DIRECT	GO:0006906~vesicle fusion	12	0.226757	0.00705385	VAMP8, STX12, VAMP7, SYT11, STX16, STX7, GOSR1, STX5, VAMP1, STX4, VAMP2, VAMP3	3832	22	15999	2.27733	1	0.718321	0.71767
GOTERM_BP_DIRECT	GO:0048015~phosphatidylinositol-mediated signaling	12	0.226757	0.00705385	LOC122425452, PLCB3, PLCB4, PIK3CA, PLCG2, PIK3CD, PIK3C3, PI4KB, PLCG1, PIK3C2A, PLCD1, PIK3CG	3832	22	15999	2.27733	1	0.718321	0.71767
KEGG_PATHWAY	ccad00280:Valine, leucine and isoleucine degradation	22	0.415722	0.00735323	BCKDHA, ECHS1, ACAA2, HMGCS1, MCCC1, HSD17B10, AACS, ACAT2, ACAT1, IL4I1, ALDH6A1, OXCT1, EHHADH, IVD, DBT, PCCB, BCAT1, ACAA1, DLD, ALDH7A1, HIBCH, BCAT2	2430	54	10427	1.74816	0.92557	0.0345111	0.0252951
GOTERM_BP_DIRECT	GO:0046854~phosphatidylinositol phosphate biosynthetic process	14	0.26455	0.00766074	CISH, INPP1, TTC7A, PIK3R1, SOCS2, SOCS3, SOCS1, IMPA2, BPNT2, BPNT1, PI4KB, IP6K1, SOCS7, PI4K2A	3832	28	15999	2.08755	1	0.718321	0.71767
GOTERM_BP_DIRECT	GO:0006935~chemotaxis	15	0.283447	0.00772123	LOC122425045, XCR1, C5AR2, LOC122425049, C5AR1, PTAFR, CXCR4, CXCR6, FES, CXCR3, ACKR3, CCR8, CCR4, CCR3, CCR2	3832	31	15999	2.02021	1	0.718321	0.71767
GOTERM_BP_DIRECT	GO:0016226~iron-sulfur cluster assembly	9	0.170068	0.00780784	ISCA2, ISCA1, LYRM4, NUBPL, CIAO2B, CIAO3, NUBP1, NUBP2, CIAO1	3832	14	15999	2.684	1	0.718321	0.71767
GOTERM_BP_DIRECT	GO:0050853~B cell receptor signaling pathway	9	0.170068	0.00780784	LAT2, ITK, TEC, SYK, KLHL6, LCK, CD19, BTK, BMX	3832	14	15999	2.684	1	0.718321	0.71767
KEGG_PATHWAY	ccad05417:Lipid and atherosclerosis	75	1.41723	0.00787854	HSP90AB1, LOC122423465, PIK3CD, LOC122428193, LOC122428192, LOC122449214, FASLG, CASP9, PPP3CA, CASP7, CASP8, CASP6, AKT2, AKT1, OLR1, RAC1, JAK2, MAP3K7, MAP3K5, MAP2K4, CHUK, IRAK4, VAV1, RHOA, ERN1, PLCB3, PLCB4, PIK3CA, TRAF6, IRF7, LOC122430140, ARHGEF1, PPARG, TLR6, TP53, ATF4, CAMK2D, LOC122430139, SRC, LOC122435269, LOC122449754, PIK3R1, TANK, RELA, RAP1B, CDC42, MAPK9, MAPK8, PPP3R1, RAP…	2430	246	10427	1.30822	0.938223	0.0362934	0.0266014
KEGG_PATHWAY	ccad00564:Glycerophospholipid metabolism	37	0.699169	0.00795631	AGPAT5, ACHE, TAFAZZIN, DGKA, LPCAT1, PLD4, PLD1, AGPAT1, PLA2G6, LCLAT1, SELENOI, PLD3, AGPAT4, PGS1, PTDSS1, GPAT4, CEPT1, CDIPT, LYPLA2, LYPLA1, PCYT2, CHKB, MBOAT1, CRLS1, PISD, LOC122432869, GNPAT, PLPP5, PHOSPHO1, GPAM, LPCAT3, ETNK1, LPCAT2, GPD1L, PNPLA6, LPIN1, CDS2	2430	106	10427	1.49778	0.939905	0.0362934	0.0266014
KEGG_PATHWAY	ccad05340:Primary immunodeficiency	16	0.302343	0.00804228	CIITA, DCLRE1C, TNFRSF13B, TAP2, LOC122441383, RFXANK, IL2RG, UNG, CD4, PTPRC, LCK, CD8A, CD19, BTK, ORAI1, IL7R	2430	35	10427	1.96158	0.94171	0.0362934	0.0266014
GOTERM_MF_DIRECT	GO:0031267~small GTPase binding	31	0.58579	0.00813033	CYFIP2, CYFIP1, DOCK5, DOCK3, ROCK1, CSE1L, IPO7, GGA1, RIMS1, XPO1, XPO6, XPO5, KNTC1, TNPO1, RAB11FIP5, RALBP1, RPH3AL, YIPF1, XPO7, RANGAP1, CYRIB, SYTL3, SYTL2, DIAPH2, FMNL2, XPOT, RIN3, PKN1, DOCK2, RIN2, CDC42SE2	3930	83	16442	1.56259	0.99999	0.521819	0.519972
GOTERM_BP_DIRECT	GO:0006470~protein dephosphorylation	42	0.793651	0.00845339	PTPRR, PTPRN, PPM1H, PTEN, PTPN21, PTPRJ, PPM1K, PTPRH, CDC14A, PPM1F, PTPRF, PPM1G, DUSP10, PPP2R1A, PPP2R5E, PTPMT1, PTPN1, DUSP5, RNGTT, PTPRN2, STYX, PPP2R5B, PPP2R5A, PTPN11, PPP2R5D, PPP4R3A, PPP4R3B, CDC25C, SSH2, SSH3, LOC122443360, CDC25A, DUSP7, PDP1, PPM1B, PTPRC, PTPRA, PTPN6, TAB1, PTPN7, PTPN4, PTPN2	3832	121	15999	1.44921	1	0.746604	0.745928
GOTERM_MF_DIRECT	GO:0004672~protein kinase activity	43	0.812547	0.00878733	SCYL3, RNASEL, TRIO, ARAF, BUB1B, PKMYT1, MAP3K20, SPEG, NEK1, NEK2, NEK3, MAP3K4, SCYL2, PSKH1, NEK9, MAP2K1, CDKL5, RIPK3, MLKL, NEK4, STRADA, EIF2AK1, NEK6, NEK7, EIF2AK3, LMTK2, CASK, NRBP1, DCLK1, TBCK, PEAK3, PAN3, STK24, TAOK3, STK26, TAOK1, TAOK2, POMK, TNIK, RAF1, TRIB2, STK40, CDK16	3930	125	16442	1.4392	0.999996	0.539465	0.537555
KEGG_PATHWAY	ccad03410:Base excision repair	22	0.415722	0.00933663	RFC5, MBD4, FEN1, PARG, PARP4, PCNA, PARP1, RFC2, MPG, XRCC1, UNG, POLD3, POLB, POLE4, POLG2, NTHL1, TDP1, POLD2, POLE3, POLL, NEIL1, POLG	2430	55	10427	1.71638	0.963188	0.0416012	0.0304918
KEGG_PATHWAY	ccad04650:Natural killer cell mediated cytotoxicity	48	0.907029	0.00963713	LOC122429940, LOC122424030, SHC1, ARAF, PIK3CD, FASLG, PIK3R1, ITGAL, PPP3CA, PPP3R1, LOC122423927, SH3BP2, PLCG2, RAC2, PTK2B, MAPK1, FYN, PLCG1, RAC1, BID, MAPK3, LOC122429597, MAP2K1, SYK, PRKCB, IFNGR1, IFNGR2, NFATC2, PTPN11, LOC122441383, VAV1, LOC122429592, LAT2, NCR1, NCR3, LOC122439532, LOC122439578, PIK3CA, LCK, CD48, KRAS, LCP2, PTPN6, LOC122455089, RAF1, HCST, LAT, IFNAR1	2430	147	10427	1.40113	0.966916	0.0424034	0.0310797
GOTERM_CC_DIRECT	GO:0000445~THO complex part of transcription export complex	6	0.113379	0.00983368	LOC122444987, THOC1, THOC3, THOC2, THOC5, THOC7	3619	7	15361	3.63818	0.998863	0.306632	0.300374
GOTERM_CC_DIRECT	GO:0030015~CCR4-NOT core complex	6	0.113379	0.00983368	CNOT7, CNOT1, CNOT2, CNOT3, CNOT8, CNOT9	3619	7	15361	3.63818	0.998863	0.306632	0.300374
GOTERM_MF_DIRECT	GO:0004725~protein tyrosine phosphatase activity	22	0.415722	0.00999992	PTPN1, PTPRR, PTPRN2, EYA3, PTPRN, PTPRO, PTEN, PTPN21, PTPRJ, PTPN11, PTPRH, CDC25C, PTPN13, PTPRF, CDC25A, PTPRC, PTPRA, PTPN6, PTPN7, PTPN4, PTPN2, TNS2	3930	54	16442	1.70448	0.999999	0.588329	0.586245
GOTERM_BP_DIRECT	GO:0006397~mRNA processing	17	0.32124	0.01017	RBM39, RNASEL, RBM25, SRRT, GPATCH1, THOC2, HNRNPLL, THOC7, PTBP2, SRRM1, PAN2, ERN1, BCLAF1, PAN3, U2AF2, RBBP6, RBM23	3832	38	15999	1.86781	1	0.818869	0.818127
GOTERM_MF_DIRECT	GO:0016818~hydrolase activity, acting on acid anhydrides, in phosphorus-containing anhydrides	6	0.113379	0.0104979	BLM, RTEL1, BRIP1, DDX11, HLTF, NUDT19	3930	7	16442	3.58604	1	0.592921	0.590822
GOTERM_BP_DIRECT	GO:0048024~regulation of mRNA splicing, via spliceosome	6	0.113379	0.0105951	SON, HNRNPK, LOC122436634, LOC122434481, SF1, SRRM1	3832	7	15999	3.57866	1	0.818869	0.818127
GOTERM_BP_DIRECT	GO:0006974~DNA damage response	15	0.283447	0.0107511	PLK3, ARMT1, BRAT1, PPP4R3A, PPP4R3B, CUL4A, FXR1, PIDD1, CHCHD6, HMCES, UBR5, POLE3, MACROD1, TRIP12, IER3	3832	32	15999	1.95708	1	0.818869	0.818127
GOTERM_BP_DIRECT	GO:0031122~cytoplasmic microtubule organization	14	0.26455	0.0108888	DST, TUBGCP2, CCDC13, CRIPT, TBCB, HOOK3, WDR73, CCDC88B, HOOK1, CCDC88C, CLIP4, TUBGCP5, TUBGCP6, TUBGCP3	3832	29	15999	2.01557	1	0.818869	0.818127
GOTERM_BP_DIRECT	GO:0008380~RNA splicing	8	0.151172	0.0111345	PRPF18, SCNM1, RBM8A, LOC122423495, SNRNP27, RP9, CCAR2, SRSF11	3832	12	15999	2.7834	1	0.818869	0.818127
GOTERM_MF_DIRECT	GO:0003700~DNA-binding transcription factor activity	36	0.680272	0.0111756	ZNF771, CREBZF, ZNF296, ZNF395, ZNF250, PRDM15, CREBL2, IKZF1, FOXM1, LOC122449871, IKZF5, NFIL3, ZNF628, LOC122420035, TRPS1, E4F1, LOC122421723, GTF2I, ESRRA, ZNF683, LOC122420044, LOC122420022, LOC122420021, OLIG2, LOC122420283, FOXN2, NR6A1, NFILZ, LOC122420720, LOC122420586, ZSCAN21, LOC122421399, ZNF358, MZF1, SLC2A4RG, ZSCAN2	3930	102	16442	1.47661	1	0.600416	0.59829
GOTERM_MF_DIRECT	GO:0008270~zinc ion binding	178	3.36357	0.011481	ZNF330, CDA, PGLYRP4, TES, PGLYRP2, ZFAND3, KDM1B, EHMT2, ZFAND5, NPEPPS, HERC2, TRIM28, ZMIZ1, ZMIZ2, TRIM24, ENPP2, KAT7, TRIM27, PGLYRP1, SCAPER, TRIM21, LOC122434823, MORC3, KDM2A, USP5, PRKCB, LOC122429635, USP3, NSMCE2, ZCRB1, FBXO11, CLPX, LOC122437131, DCTD, AFG3L2, TRIM13, MATR3, NEIL1, UTRN, TRIM10, SQSTM1, TRIM11, SF1, CUL9, ZNF276, ZCCHC7, LOC122430499, LOC122454388, L3MBTL3, L3MBTL2,…	3930	637	16442	1.16908	1	0.600416	0.59829
KEGG_PATHWAY	ccad00450:Selenocompound metabolism	10	0.188964	0.0120858	TXNRD3, TXNRD2, TXNRD1, CTH, MARS1, MTR, SCLY, PAPSS2, LOC122432528, PAPSS1	2430	18	10427	2.38386	0.986159	0.052521	0.0384955
KEGG_PATHWAY	ccad04910:Insulin signaling pathway	51	0.963719	0.0123763	PYGB, PDE3B, PRKAG1, ARAF, PIK3CD, PYGM, PYGL, PTPRF, CRKL, LIPE, PPP1CC, GYS1, AKT2, FLOT1, AKT1, PRKACB, SREBF1, PRKAB2, MAP2K1, TSC2, PHKA1, TSC1, PRKAB1, PIK3CA, PRKAR1A, PPP1R3B, PPP1R3E, PPP1R3D, RAPGEF1, RAF1, CRK, FBP1, SHC1, PIK3R1, FOXO1, SOCS2, MAPK9, SOCS3, MAPK8, SOCS1, PHKG2, EIF4EBP1, MAPK1, MAPK3, PTPN1, PKLR, BAD, PPP1CA, RHEB, FASN, KRAS	2430	160	10427	1.36774	0.98752	0.0527119	0.0386355
KEGG_PATHWAY	ccad05221:Acute myeloid leukemia	26	0.491308	0.0125865	SPI1, ITGAM, TCF7, ARAF, PIK3CD, PIK3R1, RELA, MYC, AKT2, PIM1, EIF4EBP1, MAPK1, AKT1, PIM2, MAPK3, MAP2K1, CHUK, BAD, STAT3, RUNX1, PIK3CA, KIT, KRAS, RAF1, LOC122441627, PPARD	2430	70	10427	1.59378	0.988421	0.0527119	0.0386355
KEGG_PATHWAY	ccad00230:Purine metabolism	45	0.85034	0.0126005	HDDC2, GUCY1B1, PDE1B, PDE3B, GMPS, AK2, PRUNE1, ADCY3, NUDT2, AK4, NTPCR, NT5C2, NUDT5, AK6, AK7, PAPSS2, PAPSS1, NT5C, DGUOK, NT5E, LOC122437104, PDE4B, PGM2, ENPP1, PDE4A, ENPP4, NUDT16, PGM1, RRM1, ENTPD4, ENTPD5, NME2, NME3, ADA2, AMPD3, DCK, NUDT9, ADCY9, NME6, IMPDH2, ADSS1, HPRT1, ADSS2, PDE7A, GART	2430	138	10427	1.39922	0.988479	0.0527119	0.0386355
KEGG_PATHWAY	ccad03460:Fanconi anemia pathway	21	0.396825	0.0127305	FANCI, BLM, RMI2, FANCM, TOP3A, FAAP24, RPA2, FANCC, BRCA1, MLH1, BRIP1, SLX4, EME2, ERCC4, USP1, PMS2, SLX1A, TELO2, POLH, FAN1, ATR	2430	53	10427	1.70019	0.989001	0.0527119	0.0386355
KEGG_PATHWAY	ccad05205:Proteoglycans in cancer	69	1.30385	0.0128785	ITGB1, CDKN1A, WNT2B, ARAF, PIK3CD, FASLG, ACTB, PPP1CC, PLAU, MYC, AKT2, AKT1, ITGAV, RAC1, PRKACB, MAP2K1, PPP1R12A, PRKCB, FRS2, NUDT16L1, HSPG2, VAV1, RHOA, TIAM1, PIK3CA, ARHGEF1, ITGA5, EZR, RAF1, PPP1R12C, MET, TP53, HBEGF, CAMK2D, SDC4, ROCK1, SRC, PXN, WNT8B, ITPR2, LOC122427080, ITPR3, IQGAP1, PIK3R1, HIF1A, SLC9A1, CDC42, PLCG2, MAPK1, FLNA, PLCG1, MAPK3, TGFB1, FZD4, PTCH1, STAT3, RDX…	2430	228	10427	1.29858	0.989566	0.0527119	0.0386355
GOTERM_CC_DIRECT	GO:0000151~ubiquitin ligase complex	14	0.26455	0.0131253	ANKIB1, RING1, AMFR, DCUN1D4, RNF8, DCUN1D1, UBE4A, UBR2, UBE4B, RNF144A, RNF144B, ABTB1, ARIH2, ASB1	3619	30	15361	1.98079	0.999884	0.385262	0.3774
GOTERM_BP_DIRECT	GO:0045454~cell redox homeostasis	9	0.170068	0.0132543	PRDX5, PRDX4, TXNRD3, TXNRD2, TXNRD1, PRDX1, KRIT1, SELENOT, TXN2	3832	15	15999	2.50506	1	0.818869	0.818127
GOTERM_BP_DIRECT	GO:0046597~negative regulation of viral entry into host cell	5	0.0944822	0.0132757	LOC122431080, LOC122431078, LOC122431079, LOC122430804, LOC122431250	3832	5	15999	4.1751	1	0.818869	0.818127
GOTERM_BP_DIRECT	GO:0006895~Golgi to endosome transport	5	0.0944822	0.0132757	SYS1, RAB14, SORT1, DOP1B, DOP1A	3832	5	15999	4.1751	1	0.818869	0.818127
GOTERM_BP_DIRECT	GO:0035455~response to interferon-alpha	5	0.0944822	0.0132757	LOC122431080, LOC122431078, LOC122431079, LOC122430804, LOC122431250	3832	5	15999	4.1751	1	0.818869	0.818127
GOTERM_BP_DIRECT	GO:0035456~response to interferon-beta	5	0.0944822	0.0132757	LOC122431080, LOC122431078, LOC122431079, LOC122430804, LOC122431250	3832	5	15999	4.1751	1	0.818869	0.818127
GOTERM_BP_DIRECT	GO:0006888~endoplasmic reticulum to Golgi vesicle-mediated transport	32	0.604686	0.0133511	COPB2, PGAP1, TMED10, KDELR1, COPB1, GOSR1, MIA2, LMAN1, TMED2, STX5, WHAMM, YKT6, SEC23B, SEC31B, BCAP31, SEC24B, YIPF4, TRAPPC4, YIPF5, NRBP1, ARCN1, TRAPPC6A, TBC1D20, TRAPPC6B, ZW10, YIPF6, COPG1, SEC22B, ERGIC2, SEC24C, ERGIC1, BET1	3832	89	15999	1.50116	1	0.818869	0.818127
GOTERM_CC_DIRECT	GO:0005770~late endosome	13	0.245654	0.0134786	PARM1, PIK3R4, IGF2R, ELAPOR1, RAB32, TMEM59, FYCO1, AP5M1, SNX14, VPS8, RAB9A, VPS35, RAB7A	3619	27	15361	2.04367	0.999909	0.385262	0.3774
KEGG_PATHWAY	ccad01100:Metabolic pathways	448	8.46561	0.0142224	CDA, PGAP1, EHMT2, UXS1, XYLT2, XYLT1, IL4I1, NSDHL, SCP2, NAMPT, PIP4K2A, PIP4K2C, SDS, GLCE, ADCY9, MTHFD2, HMBS, LOC122421476, IDNK, LOC122455265, HPRT1, LOC122421478, PI4K2A, GNE, IDO1, LIPT2, TPH2, MTMR2, SHMT2, RPN1, MTMR8, SDSL, MTMR4, PLA2G6, HACD3, HACD2, ADH5, MTMR6, LDHB, RDH11, RDH10, PRDM16, PLCG2, ST3GAL4, PIP5K1A, PLCG1, RDH13, PIP5K1C, HAO2, HMOX2, ST3GAL3, CHKB, SETD1B, PMM2, SET…	2430	1764	10427	1.08976	0.993541	0.0575436	0.0421768
GOTERM_MF_DIRECT	GO:0003824~catalytic activity	10	0.188964	0.0143482	HINT3, RSAD2, LOC122421111, PGGHG, LOC122421112, AZIN2, PLD4, ABHD6, HACL1, PLD3	3930	18	16442	2.32429	1	0.716849	0.714311
KEGG_PATHWAY	ccad04136:Autophagy - other	16	0.302343	0.0144277	GABARAPL2, BECN1, GABARAPL1, LOC122432124, PIK3R4, WIPI1, WIPI2, PPP2CA, LOC122443603, ATG2A, MLST8, ATG4C, ULK2, PIK3C3, ATG7, ATG2B	2430	37	10427	1.85554	0.993997	0.0577109	0.0422995
GOTERM_BP_DIRECT	GO:0006623~protein targeting to vacuole	10	0.188964	0.0145433	LOC122443943, TMEM50A, VPS13C, VPS8, VPS13D, PIK3R4, VPS13A, VPS37D, VPS37B, MON1B	3832	18	15999	2.3195	1	0.835866	0.835109
GOTERM_MF_DIRECT	GO:0051539~4 iron, 4 sulfur cluster binding	11	0.207861	0.0150012	ISCA2, NDUFS8, RSAD2, NUBPL, NTHL1, IREB2, LIAS, CIAO3, MOCS1, NUBP1, NUBP2	3930	21	16442	2.19147	1	0.716849	0.714311
KEGG_PATHWAY	ccad05152:Tuberculosis	62	1.17158	0.0151316	CIITA, LOC122429366, ITGAM, TRADD, CASP9, PPP3CA, CASP8, AKT2, AKT1, JAK2, CTSD, JAK1, ATP6AP1, SYK, SPHK2, IFNGR1, IFNGR2, IRAK4, RHOA, TRAF6, LOC122433255, PIK3C3, TLR6, CLEC4E, RAF1, ATP6V0D1, ATP6V0C, RAB7A, LOC122424250, CAMK2D, RAB5B, RAB5C, SRC, LOC122429106, BCL10, CORO1A, RELA, MALT1, MAPK9, MAPK8, PPP3R1, LOC122424259, ATP6V0A2, MAPK1, LOC122429902, FADD, BID, MAPK3, HSPA9, PLK3, LOC122…	2430	203	10427	1.31054	0.995332	0.0592887	0.0434559
KEGG_PATHWAY	ccad04015:Rap1 signaling pathway	67	1.26606	0.015159	ITGB1, ITGAM, PIK3CD, ITGAL, ACTB, CRKL, SIPA1L1, RASSF5, AKT2, RAC2, LOC122426218, AKT1, RAC1, MAP2K1, PRKCB, F2R, VAV1, RHOA, TIAM1, PLCB3, PLCB4, ADCY9, PIK3CA, KIT, RAPGEF1, EVL, LCP2, PRKD1, TLN2, RAF1, PFN1, MET, RAPGEF6, CRK, SKAP1, RAPGEF3, EPHA2, RAPGEF4, RALA, RALB, RGS14, SRC, GNAI3, ADCY3, PIK3R1, GNAI1, RASGRP3, GNAI2, RAP1B, CDC42, LOC122444227, PARD6B, RAP1A, P2RY1, KRIT1, MAPK1, P…	2430	222	10427	1.29502	0.995378	0.0592887	0.0434559
KEGG_PATHWAY	ccad04520:Adherens junction	35	0.661376	0.0153647	ROCK1, SRC, TCF7, WAS, PTPRJ, WASL, IQGAP1, PTPRF, ACTB, RAP1B, CDC42, RAP1A, RAC2, KRIT1, MAPK1, FYN, RAC1, WASF2, LOC122425824, MAP3K7, MAPK3, PTPN1, SMAD3, CSNK2A1, SMURF2, SMURF1, HEG1, LMO7, RHOA, TGFBR2, CSNK2B, PTPN6, MET, VCL, NECTIN1	2430	103	10427	1.45809	0.995705	0.0594326	0.0435614
GOTERM_BP_DIRECT	GO:0000462~maturation of SSU-rRNA from tricistronic rRNA transcript (SSU-rRNA, 5.8S rRNA, LSU-rRNA)	13	0.245654	0.015375	UTP25, KLHDC3, UTP6, UTP4, RPS8, MRPS11, HEATR1, PWP2, WDR43, RPS16, TSR1, NOL10, DCAF13	3832	27	15999	2.01024	1	0.835866	0.835109
GOTERM_BP_DIRECT	GO:0006406~mRNA export from nucleus	12	0.226757	0.015453	FYTTD1, LOC122444987, NCBP1, NUP85, POLDIP3, TPR, THOC1, THOC3, NUP88, THOC2, THOC5, THOC7	3832	24	15999	2.08755	1	0.835866	0.835109
GOTERM_MF_DIRECT	GO:0003756~protein disulfide isomerase activity	7	0.132275	0.0157382	PDIA3, QSOX1, P4HB, QSOX2, PDIA6, PDIA5, PDIA4	3930	10	16442	2.9286	1	0.716849	0.714311
GOTERM_MF_DIRECT	GO:0030983~mismatched DNA binding	7	0.132275	0.0157382	MSH6, MSH2, MSH3, MSH5, PMS2, MLH1, MLH3	3930	10	16442	2.9286	1	0.716849	0.714311
KEGG_PATHWAY	ccad01522:Endocrine resistance	33	0.623583	0.015828	NOTCH2, RB1, CDKN1A, NOTCH1, SHC1, SRC, ARAF, ADCY3, PIK3CD, LOC122427080, PIK3R1, MAPK9, MAPK8, AKT2, MAPK1, AKT1, PRKACB, MAPK3, MAP2K1, BAD, NCOA3, MAPK14, PTK2, ADCY9, PIK3CA, CDK4, SP1, BCL2, BAX, KRAS, RAF1, TP53, HBEGF	2430	96	10427	1.47501	0.996361	0.0605594	0.0443873
GOTERM_BP_DIRECT	GO:0000278~mitotic cell cycle	25	0.472411	0.0158753	TUBGCP2, CLTC, SKA1, PPP2CA, TUBA1B, TUBB1, SNX9, PLK3, CDT1, LOC122426544, LOC122427612, TUBB, PLK2, LOC122426664, TUBE1, TUBB4A, ASPM, NEDD1, SNX18, ZW10, TUBGCP5, TUBGCP6, LOC122427613, TUBGCP3, MCPH1	3832	66	15999	1.58148	1	0.835866	0.835109
GOTERM_BP_DIRECT	GO:0000209~protein polyubiquitination	25	0.472411	0.0158753	MARCHF1, UBE2D4, FBXO28, PELI2, UBE3B, FBXO22, RNF114, UBR5, ARIH2, FBXO4, UBE2H, AREL1, ANKIB1, PPIL2, HUWE1, UBE4A, UBE4B, UBE2A, RNF144A, RNF144B, UBE2R2, MKRN2, STUB1, TRIP12, UBE2K	3832	66	15999	1.58148	1	0.835866	0.835109
GOTERM_BP_DIRECT	GO:0006884~cell volume homeostasis	7	0.132275	0.0158996	SLC12A2, SLC12A4, SLC12A5, CLNS1A, SLC12A6, SLC12A8, SLC12A9	3832	10	15999	2.92257	1	0.835866	0.835109
KEGG_PATHWAY	ccad04625:C-type lectin receptor signaling pathway	36	0.680272	0.0162792	SRC, PIK3CD, ITPR2, LOC122427080, ITPR3, BCL10, PIK3R1, RELA, MALT1, RELB, MAPK9, PPP3CA, PPP3R1, MAPK8, CASP8, AKT2, PLCG2, MAPK1, AKT1, MAPK3, PLK3, CHUK, SYK, STAT1, STAT2, PRKCD, NFATC3, NFATC2, PTPN11, MAPK14, RHOA, NFKB2, PIK3CA, KRAS, CLEC4E, RAF1	2430	107	10427	1.44368	0.996903	0.0616159	0.0451617
KEGG_PATHWAY	ccad03450:Non-homologous end-joining	8	0.151172	0.0164812	FEN1, XRCC6, DCLRE1C, MRE11, POLM, PRKDC, DNTT, POLL	2430	13	10427	2.64058	0.997119	0.0617168	0.0452356
KEGG_PATHWAY	ccad04935:Growth hormone synthesis, secretion and action	41	0.774754	0.018052	ATF6B, SHC1, GNAI3, ADCY3, PIK3CD, ITPR2, ITPR3, PIK3R1, GNAI1, CRKL, GNAI2, SOCS2, MAPK9, SOCS3, MAPK8, SOCS1, AKT2, CREB3L2, PLCG2, MAPK1, AKT1, PLCG1, JAK2, PRKACB, MAPK3, MAP2K4, MAP2K1, STAT1, PRKCB, STAT3, MAPK14, PTK2, PLCB3, ADCY9, PLCB4, PIK3CA, KRAS, RAF1, CRK, LOC122441627, ATF4	2430	126	10427	1.39626	0.998359	0.0657626	0.048201
KEGG_PATHWAY	ccad04922:Glucagon signaling pathway	38	0.718065	0.0180565	PYGB, CAMK2D, LOC122430777, PDE3B, PRKAG1, SLC2A1, ITPR2, ITPR3, PYGM, PYGL, FOXO1, LDHB, GYS1, PPP3CA, PPP3R1, PPP4C, AKT2, CREB3L2, PHKG2, AKT1, PRKACB, CPT1A, PRKAB2, PRMT1, PGAM1, PHKA1, PPP4R3A, PPP4R3B, PRKAB1, SIRT1, CPT1B, PFKL, PLCB3, PLCB4, PKM, SIK2, FBP1, ATF4	2430	115	10427	1.41788	0.998362	0.0657626	0.048201
KEGG_PATHWAY	ccad05230:Central carbon metabolism in cancer	28	0.529101	0.0181221	LOC122430777, SLC2A1, PTEN, PIK3CD, PIK3R1, HIF1A, LDHB, MYC, AKT2, MAPK1, AKT1, SLC16A3, MAPK3, G6PD, MAP2K1, PGAM1, IDH2, LOC122423355, SIRT3, PFKL, PKM, PIK3CA, KIT, KRAS, RAF1, MET, TP53, FGFR2	2430	79	10427	1.52084	0.9984	0.0657626	0.048201
GOTERM_CC_DIRECT	GO:0005813~centrosome	46	0.869237	0.0183042	CEP57, AKNA, NUMA1, DCTN2, TRAF3IP1, TUBGCP2, CEP85L, CEP120, CCNF, CDC14A, IFT74, ZFYVE26, CEP70, CCDC77, OFD1, PLK3, NEK9, RANBP1, ODF2, CKAP2L, PLK2, CCDC15, IFT80, HOOK3, MZT1, TTI2, CCDC88B, DYNC1LI1, DYNC1LI2, NIN, RAD51D, ESPL1, CCNE1, HOOK1, ZFYVE19, CCDC88C, TUBGCP5, TUBGCP6, CEP162, TRIM59, TUBGCP3, CLUAP1, CCDC61, CEP44, MAP3K11, SDCCAG8	3619	143	15361	1.36538	0.999997	0.50126	0.491031
GOTERM_BP_DIRECT	GO:0006405~RNA export from nucleus	8	0.151172	0.0191913	NUP214, NUP155, POM121C, NUP188, LOC122442530, XPO5, NUP98, RAE1	3832	13	15999	2.5693	1	0.985453	0.984561
GOTERM_MF_DIRECT	GO:0005085~guanyl-nucleotide exchange factor activity	53	1.00151	0.0193107	BCAR3, DOCK5, DOCK3, TRIO, DOCK9, ARHGEF10L, DOCK10, EEF1B2, AKAP13, PREX1, RASGEF1C, PSD4, FBXO8, RALGPS2, PLEKHG3, PLEKHG1, SH2D3C, VAV1, TIAM2, TIAM1, FRMD7, SPATA13, RAPGEF1, ARHGEF1, PREB, DENND6B, RIN3, DOCK2, RAPGEF6, RIN2, RAPGEF3, RAPGEF4, ARHGEF6, RAP1GDS1, RASGRP1, C9ORF72, FGD1, RASGRP3, RIC8A, FGD3, FGD4, FGD6, CYTH4, ECT2, CYTH1, ARFGEF1, ARFGEF2, ARHGEF37, IQSEC2, NET1, RABIF, RGL2…	3930	167	16442	1.32777	1	0.852083	0.849066
GOTERM_CC_DIRECT	GO:0005776~autophagosome	11	0.207861	0.0196701	GABARAPL2, FYCO1, GABARAPL1, MAP1LC3B, STK35, STING1, TP53INP1, TBC1D25, ULK2, ULK1, C9ORF72	3619	22	15361	2.12227	0.999999	0.50126	0.491031
GOTERM_CC_DIRECT	GO:0005743~mitochondrial inner membrane	39	0.736961	0.0197289	SHMT2, LOC122426554, LOC122452428, TIMM10, OMA1, GHITM, PSEN1, PPOX, MAIP1, SLC25A26, TIMM17A, TIMM17B, SLC25A42, LOC122436608, LOC122446050, TRAP1, LOC122454255, NDUFA3, LOC122423355, TIMM44, EXOG, TTC19, LOC122428087, DHODH, LETM1, OXA1L, SMDT1, TMEM11, SLC25A19, CHDH, SFXN3, YME1L1, LOC122421476, SFXN4, LOC122455265, SFXN2, SLC25A5, SLC25A4, SLC25A6	3619	118	15361	1.40286	0.999999	0.50126	0.491031
GOTERM_BP_DIRECT	GO:0006338~chromatin remodeling	22	0.415722	0.0198573	KDM5A, BRD2, DR1, KDM5C, KDM4C, LOC122454877, SATB1, CHD4, BAZ1A, NPM3, BAZ1B, ARID1A, SMARCA2, ARID1B, HCFC1, TADA2B, KAT2B, TADA2A, YEATS2, RUVBL2, LOC122445522, JARID2	3832	57	15999	1.61144	1	0.996476	0.995574
GOTERM_BP_DIRECT	GO:0006367~transcription initiation at RNA polymerase II promoter	14	0.26455	0.0203931	TAF10, GTF2F2, GTF2E1, GTF2E2, GTF2H5, TAF6L, ERCC3, TAF7, TAF6, POLR2G, TAF4, POLR2I, LOC122441658, TAF2	3832	31	15999	1.88553	1	1	0.999547
GOTERM_MF_DIRECT	GO:0031418~L-ascorbic acid binding	9	0.170068	0.0207713	EGLN3, EGLN2, P4HA1, OGFOD1, OGFOD3, PLOD3, P3H1, PLOD1, P4HTM	3930	16	16442	2.35334	1	0.887557	0.884414
KEGG_PATHWAY	ccad03022:Basal transcription factors	20	0.377929	0.0214652	TAF15, TAF12, TAF10, GTF2H3, GTF2H4, GTF2F2, GTF2E1, TAF5L, GTF2E2, GTF2H5, TAF6L, ERCC3, TBPL1, TAF7, TAF6, TAF4, TAF3, TAF2, TAF1, GTF2I	2430	52	10427	1.65036	0.999518	0.0770994	0.0565104
GOTERM_BP_DIRECT	GO:0006914~autophagy	10	0.188964	0.0218588	VMP1, BECN1, STK35, TGFBRAP1, VPS13A, ULK2, ULK1, NRBF2, C9ORF72, VPS39	3832	19	15999	2.19742	1	1	0.999547
KEGG_PATHWAY	ccad04213:Longevity regulating pathway - multiple species	24	0.453515	0.0220187	HSPA8, HDAC2, LOC122430139, PRKAB2, HDAC1, LOC122423465, PRKAG1, ADCY3, PIK3CD, LOC122428193, PIK3R1, SOD2, FOXO3, PRKAB1, SIRT1, FOXO1, SOD1, ADCY9, PIK3CA, AKT2, LOC122430140, AKT1, KRAS, PRKACB	2430	66	10427	1.56034	0.999605	0.0782887	0.057382
GOTERM_BP_DIRECT	GO:0006368~transcription elongation by RNA polymerase II	11	0.207861	0.0220227	PCID2, SUPT16H, LOC122455291, LOC122443597, ELOA, TCEA1, PAF1, SUPT5H, SUPT6H, CDC73, ELL3	3832	22	15999	2.08755	1	1	0.999547
GOTERM_MF_DIRECT	GO:0072542~protein phosphatase activator activity	6	0.113379	0.0225055	PPP2R5E, PPP2R5B, PPP2R5A, PPP2R5D, PPP4R3A, PPP4R3B	3930	8	16442	3.13779	1	0.887557	0.884414
GOTERM_MF_DIRECT	GO:0003697~single-stranded DNA binding	20	0.377929	0.0225465	MCM7, MCM8, TWNK, XPC, TSN, POLA1, RAD51D, TEN1, ERCC4, POLR3C, TDP1, PCBP1, HMCES, PCBP2, SPRTN, POLR2G, MCM6, SSBP2, SSBP3, SSBP4	3930	51	16442	1.64067	1	0.887557	0.884414
GOTERM_MF_DIRECT	GO:0019901~protein kinase binding	25	0.472411	0.0226289	PRKRIP1, LOC122451337, SPRED3, RHOT1, CAMK2N1, RB1CC1, STAP1, RAC1, FBXO7, CNPPD1, NEK9, TRAP1, CDKN2B, PRKAB2, PPP1R12A, LRBA, RHOG, NBEAL2, LOC122427196, PRKAB1, CCNY, DNAJA3, PPP1R12C, DNAL1, CDK5R1	3930	68	16442	1.53813	1	0.887557	0.884414
GOTERM_BP_DIRECT	GO:0061709~reticulophagy	6	0.113379	0.0227029	RETREG3, STING1, RB1CC1, LOC122454314, ATG2A, ATG2B	3832	8	15999	3.13133	1	1	0.999547
GOTERM_BP_DIRECT	GO:0007030~Golgi organization	20	0.377929	0.0230114	LOC122425483, TMED10, ATP8B2, ATP8B1, SURF4, COG3, COG2, GOLPH3L, HUWE1, LYSMD3, VMP1, LMAN1, GOLPH3, GOLGA5, GORASP2, TMED2, DYM, PLEKHM2, BLZF1, PI4K2A	3832	51	15999	1.6373	1	1	0.999547
KEGG_PATHWAY	ccad03082:ATP-dependent chromatin remodeling	41	0.774754	0.0233786	HDAC2, SMARCD2, INO80D, MEAF6, HDAC1, LOC122423300, CHD4, BAZ2A, LOC122429182, LOC122429181, BAZ2B, PHF6, LOC122424293, ACTB, LOC122429185, TFPT, CHRAC1, ING3, KAT5, RBBP4, RUVBL2, BCL7B, EPC2, BRD9, RBBP7, LOC122422040, SMARCC1, SMARCC2, LOC122430006, BICRAL, MCRS1, ACTL6A, MBD2, BAZ1A, BAZ1B, ARID1A, ARID1B, SMARCA2, MORF4L1, POLE3, CDK2AP2	2430	128	10427	1.37444	0.999758	0.0809986	0.0593683
KEGG_PATHWAY	ccad05165:Human papillomavirus infection	101	1.90854	0.0234434	RB1, PATJ, MAML1, PPP2R2A, CCND3, PPP2R1A, AKT2, CREB3L2, AKT1, PRKACB, MAP2K1, ATP6V1G1, ATP6V0E1, TSC2, TSC1, LOC122429593, CCNE1, MFNG, TBPL1, RAF1, ATP6V0D1, TP53, IFNAR1, NOTCH2, ATP6V1A, NOTCH1, PXN, TCF7, LOC122427080, PIK3R1, PSEN1, FOXO1, TERT, EIF4EBP1, ATP6V0A2, FADD, ATP6V1C1, FZD4, FZD9, PTK2, DLG3, CDK4, RHEB, TADA3, ATM, ATR, ITGB1, LOC122429686, CDKN1A, WNT2B, TRADD, PTEN, PIK3CD,…	2430	359	10427	1.2072	0.999764	0.0809986	0.0593683
KEGG_PATHWAY	ccad04010:MAPK signaling pathway	88	1.66289	0.0234712	PTPRR, TRADD, LOC122423465, ARAF, HSPB1, LOC122428193, FASLG, CRKL, ELK4, RPS6KA4, RPS6KA3, PPP3CA, DUSP10, MYC, AKT2, STMN1, RAC2, AKT1, RAC1, PRKACB, MAP3K7, MAP3K4, MAP3K5, MAP2K4, DUSP5, MAP4K2, DAXX, MAP2K1, CHUK, IL1R1, PRKCB, FLT3LG, IRAK4, MAPK8IP2, TGFBR2, DUSP7, CACNB3, PPM1B, CACNB4, TRAF6, RASA1, KIT, LOC122430140, RAF1, MET, CRK, TP53, EPHA2, ATF4, LOC122430139, SRF, TGFA, LOC1224498…	2430	308	10427	1.22598	0.999766	0.0809986	0.0593683
GOTERM_BP_DIRECT	GO:0006897~endocytosis	19	0.359033	0.0247507	RALBP1, HIP1, SORT1, FNBP1, CLINT1, C9ORF72, AP3M2, SNX18, BIN3, NECAP1, HEATR5A, RABEP2, HEATR5B, LOC122423369, SNX9, PIK3C3, EPS15, CSNK1G1, REPS1	3832	48	15999	1.65265	1	1	0.999547
GOTERM_MF_DIRECT	GO:0061630~ubiquitin protein ligase activity	54	1.02041	0.0249673	RNF13, UBE3B, PRPF19, HERC4, RNF115, RNF114, HERC2, ARIH2, LOC122433413, RING1, MSL2, CCNB1IP1, RNF144A, RNF144B, RNF167, TRAF6, MARCHF1, UHRF2, PELI3, PELI2, RNF8, NEDD4L, UBR2, LOC122427080, DTX2, RCHY1, RNF5, RMND5B, RMND5A, UBR7, TMEM129, RNF170, RBBP6, RFFL, RNF20, ANKIB1, RNF24, SMURF2, RNF25, SMURF1, AMFR, SIAH2, RNF26, BFAR, RNF145, NEURL4, ITCH, NEDD4, MKRN2, RNF181, STUB1, TRIP12, RNF18…	3930	173	16442	1.3059	1	0.952808	0.949434
GOTERM_BP_DIRECT	GO:0007265~Ras protein signal transduction	15	0.283447	0.0255157	USP8, RALA, RALB, RASGRP1, RASGRP3, RIT1, RASGEF1C, RAPGEF1, USP50, KRAS, RAPGEF6, RGL2, RAPGEF3, RAPGEF4, RALGPS2	3832	35	15999	1.78933	1	1	0.999547
GOTERM_CC_DIRECT	GO:0048188~Set1C/COMPASS complex	7	0.132275	0.025855	WDR82, RBBP5, SETD1B, SETD1A, CXXC1, WDR5, ASH2L	3619	11	15361	2.70107	1	0.633447	0.62052
KEGG_PATHWAY	ccad05160:Hepatitis C	56	1.0582	0.0275384	YWHAE, RB1, SCARB1, CDKN1A, YWHAB, TRADD, ARAF, PIK3CD, PPP2R2A, FASLG, CLDN1, CASP9, CASP8, PPP2R1A, MYC, AKT2, AKT1, YWHAG, JAK1, MAP2K1, CHUK, RSAD2, TYK2, YWHAZ, PIK3CA, CLDN15, TRAF6, CLDN12, IRF7, RAF1, TP53, TLR3, IFNAR1, RNASEL, PIK3R1, RELA, PPP2CA, SOCS3, MAPK1, RIPK1, BAK1, FADD, BID, LDLR, MAPK3, LOC122423150, STAT1, BAD, EIF2AK1, STAT2, STAT3, EIF2AK3, CXCL10, CDK4, BAX, KRAS	2430	186	10427	1.2919	0.999946	0.0941118	0.0689797
GOTERM_BP_DIRECT	GO:0000226~microtubule cytoskeleton organization	29	0.547997	0.0277725	CDC14A, TUBA1B, NUAK2, MAP2, TUBB1, MAP7, MAP4, LOC122426544, LOC122427612, TUBB, LOC122426664, TUBE1, TUBB4A, EML2, EML4, DYNC1LI1, DYNC1LI2, SNRK, TTLL5, MELK, TTLL1, SIK3, CCDC170, TSSK6, TSSK3, LOC122427613, SIK2, TSSK4, TTLL9	3832	83	15999	1.45877	1	1	0.999547
KEGG_PATHWAY	ccad05010:Alzheimer disease	129	2.43764	0.0283884	CHRM3, LOC122427221, ARAF, PSMD6, PSMD7, PSMD4, SLC39A9, AKT2, PSMD2, TUBB1, AKT1, CAPN1, SLC39A2, MAP3K5, MAP2K1, CSNK2A1, LOC122427612, ADAM10, SDHD, SDHA, SDHB, ERN1, ADAM17, LOC122435630, CSNK2B, VDAC3, VDAC2, LOC122421476, ULK2, ULK1, LOC122427613, LOC122455265, VDAC1, LOC122421478, RAF1, ATF4, RTN3, PSMD12, PSMD13, LOC122435269, ATP5MC2, PIK3R4, ITPR2, ATP5MC3, ITPR3, PIK3R1, PSEN1, RTN4, L…	2430	473	10427	1.17026	0.99996	0.0953305	0.0698729
KEGG_PATHWAY	ccad04664:Fc epsilon RI signaling pathway	25	0.472411	0.0284367	PIK3CD, PIK3R1, MAPK9, MAPK8, ALOX5, AKT2, PLCG2, RAC2, MAPK1, AKT1, FYN, PLCG1, RAC1, MAPK3, MAP2K4, MAP2K1, SYK, MAPK14, VAV1, PIK3CA, BTK, KRAS, LCP2, RAF1, LAT	2430	71	10427	1.5109	0.999961	0.0953305	0.0698729
GOTERM_BP_DIRECT	GO:0006891~intra-Golgi vesicle-mediated transport	12	0.226757	0.0297102	LOC122425483, NSF, COPB2, CUX1, COG6, COPB1, COG3, VTI1A, COG2, COPG1, COPZ1, VTI1B	3832	26	15999	1.92697	1	1	0.999547
GOTERM_MF_DIRECT	GO:0051015~actin filament binding	53	1.00151	0.0299248	HIP1, WDR1, FHOD1, ARPC1B, RCSD1, SYNE3, PPP1R9B, PSTPIP1, SAMD14, CFL1, COTL1, PLS3, ACTR3, ACTR2, LOC122424660, DBNL, TPM4, TPM3, TPM2, TPM1, SPTB, FRG1, TLN2, VCL, TWF2, LOC122435468, IQGAP1, ADD3, CORO1A, AIF1, IQGAP3, CORO1B, LOC122431989, ADD2, TMEM201, SCIN, FLNA, FLNB, FLNC, GAS2L2, SVIL, GSN, NEBL, MYO5A, ARPC4, ARPC5, MYO19, MARCKS, FMNL2, MYO5B, CAPZA1, CAPZA2, MYO5C	3930	171	16442	1.29671	1	1	0.997165
KEGG_PATHWAY	ccad00030:Pentose phosphate pathway	13	0.245654	0.0304998	GPI, G6PD, TALDO1, PGD, RPIA, PFKL, PGM2, IDNK, PGLS, ALDOA, FBP1, RBKS, PGM1	2430	30	10427	1.85941	0.999982	0.100678	0.0737927
KEGG_PATHWAY	ccad04928:Parathyroid hormone synthesis, secretion and action	38	0.718065	0.0306039	CDKN1A, ATF6B, ARAF, LRP5, GNAI3, ADCY3, ITPR2, ITPR3, PTH1R, PLD1, GNAI1, GNAI2, GNA13, AKAP13, CREB3L2, GNA12, PDE4B, MAPK1, PDE4A, PRKACB, MAPK3, MEF2A, MAP2K1, PRKCB, OXSR1, RHOA, RUNX2, PLCB3, ADCY9, PLCB4, WNK1, SP1, WNK2, BCL2, ARHGEF1, RAF1, HBEGF, ATF4	2430	119	10427	1.37022	0.999982	0.100678	0.0737927
GOTERM_MF_DIRECT	GO:0140664~ATP-dependent DNA damage sensor activity	9	0.170068	0.0311694	MSH6, RAD51D, MSH2, MSH3, XRCC3, MSH5, PMS2, MLH1, MLH3	3930	17	16442	2.21491	1	1	0.997165
GOTERM_BP_DIRECT	GO:0042744~hydrogen peroxide catabolic process	10	0.188964	0.0314726	LOC122450619, PRDX5, GPX1, PRDX4, GPX3, PRDX1, LOC122450614, LOC122450616, LOC122433251, LOC122450618	3832	20	15999	2.08755	1	1	0.999547
KEGG_PATHWAY	ccad04145:Phagosome	53	1.00151	0.0318783	ITGB1, LOC122429686, SCARB1, LOC122429366, ITGAM, FCAR, ACTB, SEC61A1, TUBA1B, TUBB1, OLR1, ITGAV, SEC61B, RAC1, ATP6V1G1, ATP6V0E1, ATP6AP1, LOC122427612, TUBB, STX7, TAP2, LOC122429593, DYNC1LI1, DYNC1LI2, LOC122427613, PIK3C3, TLR6, ITGA5, SEC22B, ATP6V0D1, ATP6V0C, RAB7A, VAMP3, ATP6V1A, COLEC11, STX12, RAB5B, RAB5C, C1R, LOC122429106, LOC122435269, STX18, CORO1A, ATP6V0A2, LOC122429902, LOC1…	2430	176	10427	1.29216	0.999989	0.1039	0.0761537
GOTERM_MF_DIRECT	GO:0015379~potassium:chloride symporter activity	5	0.0944822	0.032046	SLC12A4, SLC12A5, SLC12A6, SLC12A8, SLC12A9	3930	6	16442	3.48643	1	1	0.997165
GOTERM_MF_DIRECT	GO:0017108~5'-flap endonuclease activity	5	0.0944822	0.032046	FEN1, EXO1, SLX1A, DNA2, FAN1	3930	6	16442	3.48643	1	1	0.997165
GOTERM_BP_DIRECT	GO:0035196~miRNA processing	5	0.0944822	0.0322787	ZC3H7A, ZC3H7B, SNIP1, SPOUT1, PUM2	3832	6	15999	3.47925	1	1	0.999547
GOTERM_BP_DIRECT	GO:0043087~regulation of GTPase activity	15	0.283447	0.0327864	ARHGAP9, IQGAP1, RASAL3, IQGAP3, VAV1, ARHGAP12, TRAPPC6A, FGD6, RASA3, TRAPPC6B, RASA1, PLXNB3, PLXNB1, PLXNC1, MET	3832	36	15999	1.73963	1	1	0.999547
GOTERM_CC_DIRECT	GO:0055037~recycling endosome	13	0.245654	0.0331128	ATP11B, ATP11A, RAB11B, RAB10, LOC122445317, FCHSD2, RAB14, SLC9A9, RELCH, DENND6B, WASHC1, RAB11FIP5, PLEKHJ1	3619	30	15361	1.8393	1	0.783288	0.767303
GOTERM_MF_DIRECT	GO:0004722~protein serine/threonine phosphatase activity	14	0.26455	0.0344848	PPM1H, PPM1K, CDC14A, PPM1F, PPP1CA, PPM1G, PPP2CA, PDP1, PPP1CC, PPM1B, PPP5C, PPP4C, TAB1, PPEF2	3930	33	16442	1.77491	1	1	0.997165
GOTERM_CC_DIRECT	GO:0005856~cytoskeleton	34	0.642479	0.0347777	ROCK1, FRMPD4, EPB41, FHOD1, PTPN21, ADD3, ADD2, RHOT1, EPB41L1, EPB41L2, KRIT1, PTK2B, RAC1, JAK2, WASF2, JAK1, DST, RDX, RHOG, MYO7B, MSN, TYK2, PTPN13, PTK2, FRMD5, FRMD6, FRMD7, FRMD8, EVL, TLN2, NF2, EZR, PTPN4, PLEC	3619	104	15361	1.38764	1	0.79525	0.77902
KEGG_PATHWAY	ccad01200:Carbon metabolism	43	0.812547	0.0354381	GPI, GOT1L1, ECHS1, ADPGK, SHMT2, SDSL, ADH5, ACAT2, ACAT1, PGK1, ME1, PGLS, HAO2, HIBCH, G6PD, SDS, TPI1, PKLR, IDH3G, MDH2, PGAM1, IDH2, GOT2, AMT, TALDO1, SDHD, SDHA, PGD, SDHB, RPIA, GLUD1, ALDH6A1, PFKL, SUCLA2, PKM, PCCB, OGDH, SUCLG1, IDNK, ALDOA, GAPDH, DLD, FBP1	2430	139	10427	1.32742	0.999997	0.114442	0.083881
GOTERM_BP_DIRECT	GO:0007165~signal transduction	94	1.77627	0.0357692	LMBR1L, YWHAE, ARHGAP9, FAM13B, TENM4, YWHAB, PDE3B, DIRAS2, ARAF, RAPH1, LOC122420196, ARHGAP5, ARHGAP6, ARHGAP4, SYDE1, PIDD1, LMBR1, RASSF2, RGS3, PPP2R5E, IMPA2, SIT1, RASSF5, RASSF6, PDE4B, TOM1, TCP11L2, TNFRSF8, PDE4A, CCN2, OSTF1, YWHAG, PRKAB2, PPP1R12A, IL1R1, FNBP1, THOC1, ARAP2, PPP2R5B, PPP2R5A, PPP2R5D, VRK1, IRAK4, OLFM4, RANGAP1, PRKAB1, YWHAZ, TOM1L2, SPARCL1, TNFRSF25, ULK1, RIN…	3832	328	15999	1.19652	1	1	0.999547
KEGG_PATHWAY	ccad04510:Focal adhesion	61	1.15268	0.0358624	ITGB1, PTEN, PIK3CD, LAMC1, ARHGAP5, ACTB, CRKL, PPP1CC, CCND3, AKT2, RAC2, AKT1, ITGAV, RAC1, MAP2K1, PPP1R12A, ITGA4, PRKCB, ITGA1, VAV1, RHOA, PIK3CA, RAPGEF1, ITGA7, ITGA5, TLN2, RAF1, PPP1R12C, MET, CRK, VCL, BIRC3, ITGA9, ROCK1, SHC1, SRC, LAMA4, PXN, LAMA3, PIK3R1, RAP1B, CDC42, MAPK9, MAPK8, RAP1A, MAPK1, PIP5K1A, FLNA, FYN, FLNB, PIP5K1C, PAK3, LOC122425824, PAK2, MAPK3, BAD, PARVB, PTK2…	2430	208	10427	1.2584	0.999997	0.11476	0.0841137
GOTERM_BP_DIRECT	GO:0043161~proteasome-mediated ubiquitin-dependent protein catabolic process	31	0.58579	0.0367858	USP14, WDR26, ZFAND2B, RMND5B, PSMD6, PSMD7, RMND5A, SHARPIN, PSMD4, PSMD2, PSMF1, RFFL, AREL1, SIAH2, HUWE1, BFAR, UBE2A, RAD23B, PSMA5, PSMC5, SPSB1, LOC122443943, UBXN11, PSMC1, PLAA, LOC122434167, STUB1, TRIP12, RBCK1, UBE2K, DTL	3832	92	15999	1.40683	1	1	0.999547
GOTERM_MF_DIRECT	GO:0035091~phosphatidylinositol binding	25	0.472411	0.0377877	PLEKHF2, PITPNB, NOXO1, SNX30, PLD1, PIK3C2A, ZCCHC14, GGA1, SNX29, SNX1, SNX2, SNX25, TOM1, PXDC1, SNX9, SNX8, SNX6, TOM1L2, SNX18, SNX19, SNX17, PITPNM2, AIDA, STAM2, ZCCHC2	3930	71	16442	1.47314	1	1	0.997165
GOTERM_CC_DIRECT	GO:0045335~phagocytic vesicle	6	0.113379	0.0384675	RAB32, RAB14, RAB9A, PLD4, RAB11FIP5, RAB7A	3619	9	15361	2.8297	1	0.815685	0.799038
KEGG_PATHWAY	ccad04022:cGMP-PKG signaling pathway	53	1.00151	0.0388002	GUCY1B1, PDE3B, ATP2A2, PIK3CG, PPP1CC, PPP3CA, RGS2, AKT2, CREB3L2, CNGA1, AKT1, GTF2I, MEF2A, MAP2K1, PPP1R12A, PRKCE, ADRA2B, RHOA, ADRA2A, PLCB3, PLCB4, ADCY9, ADRB3, VDAC3, VDAC2, VDAC1, SLC25A5, RAF1, SLC25A4, ATF4, SLC25A6, ATF6B, ROCK1, SRF, GNAI3, ITPR2, ADCY3, ITPR3, ADRB2, GNAI1, PIK3R5, GNAI2, GNA13, PPP3R1, GNA12, MAPK1, MAPK3, LOC122454310, BAD, NFATC3, NFATC2, ATP2B1, PPP1CA	2430	178	10427	1.27764	0.999999	0.123042	0.0901842
GOTERM_BP_DIRECT	GO:0000413~protein peptidyl-prolyl isomerization	12	0.226757	0.0395657	FKBP11, RANBP2, LOC122432636, PPIL1, PPIL2, PPIH, PPIG, PPIL3, PPIB, CWC27, PPIA, NKTR	3832	27	15999	1.8556	1	1	0.999547
GOTERM_MF_DIRECT	GO:0008474~palmitoyl-(protein) hydrolase activity	6	0.113379	0.0407864	LYPLA2, ABHD13, LYPLA1, PPT1, ABHD17C, LYPLAL1	3930	9	16442	2.78914	1	1	0.997165
GOTERM_MF_DIRECT	GO:0016303~1-phosphatidylinositol-3-kinase activity	6	0.113379	0.0407864	LOC122425452, PIK3CA, PIK3CD, PIK3C3, PIK3C2A, PIK3CG	3930	9	16442	2.78914	1	1	0.997165
GOTERM_MF_DIRECT	GO:0016746~acyltransferase activity	6	0.113379	0.0407864	AGPAT5, HHATL, PDHX, TMEM68, MBOAT1, LCLAT1	3930	9	16442	2.78914	1	1	0.997165
GOTERM_BP_DIRECT	GO:0036092~phosphatidylinositol-3-phosphate biosynthetic process	6	0.113379	0.0411245	LOC122425452, PIK3CA, PIK3CD, PIK3C3, PIK3C2A, PIK3CG	3832	9	15999	2.7834	1	1	0.999547
GOTERM_BP_DIRECT	GO:0034341~response to type II interferon	6	0.113379	0.0411245	LOC122431080, LOC122431078, LOC122431079, LOC122430804, LOC122429726, LOC122431250	3832	9	15999	2.7834	1	1	0.999547
GOTERM_BP_DIRECT	GO:0055064~chloride ion homeostasis	6	0.113379	0.0411245	SLC12A2, SLC12A4, SLC12A5, SLC12A6, SLC12A8, SLC12A9	3832	9	15999	2.7834	1	1	0.999547
GOTERM_BP_DIRECT	GO:0034976~response to endoplasmic reticulum stress	6	0.113379	0.0411245	PDIA3, PPP1R15A, PPP1R15B, P4HB, PDIA6, PDIA4	3832	9	15999	2.7834	1	1	0.999547
GOTERM_BP_DIRECT	GO:0006919~activation of cysteine-type endopeptidase activity involved in apoptotic process	6	0.113379	0.0411245	CASP9, CASP8AP2, HIP1, TNFSF15, NLRP1, BID	3832	9	15999	2.7834	1	1	0.999547
GOTERM_BP_DIRECT	GO:0055075~potassium ion homeostasis	6	0.113379	0.0411245	SLC12A2, SLC12A4, SLC12A5, SLC12A6, SLC12A8, SLC12A9	3832	9	15999	2.7834	1	1	0.999547
GOTERM_CC_DIRECT	GO:0032039~integrator complex	9	0.170068	0.0412376	INTS1, INTS2, INTS5, LOC122435830, INTS4, INTS7, INTS6, INTS8, LOC122453251	3619	18	15361	2.12227	1	0.815685	0.799038
GOTERM_CC_DIRECT	GO:0030479~actin cortical patch	9	0.170068	0.0412376	ACTR3, ACTR2, LOC122424660, HIP1, GMFB, BIN3, CAPZA1, CFL1, CAPZA2	3619	18	15361	2.12227	1	0.815685	0.799038
GOTERM_CC_DIRECT	GO:0005942~phosphatidylinositol 3-kinase complex	9	0.170068	0.0412376	SOCS2, SOCS3, LOC122425452, SOCS1, CISH, PIK3CD, PIK3R1, PIK3C2A, SOCS7	3619	18	15361	2.12227	1	0.815685	0.799038
GOTERM_MF_DIRECT	GO:0043130~ubiquitin binding	22	0.415722	0.0412383	TSG101, AMFR, RAD23B, UEVLD, TOM1L2, GGA1, SHARPIN, NPLOC4, UBXN11, UBR5, TOM1, PLAA, MARCHF7, SMARCAD1, TAB2, BUB3, RBCK1, STAM2, N4BP2, VPS36, RAE1, OTUB1	3930	61	16442	1.50888	1	1	0.997165
KEGG_PATHWAY	ccad04725:Cholinergic synapse	36	0.680272	0.0414027	ACHE, CHRM3, CAMK2D, GNAI3, ADCY3, PIK3CD, ITPR2, ITPR3, PIK3R1, PIK3CG, GNAI1, GNAI2, PIK3R5, GNG10, AKT2, CREB3L2, MAPK1, AKT1, FYN, JAK2, PRKACB, MAPK3, MAP2K1, PRKCB, GNAO1, PLCB3, ADCY9, PLCB4, PIK3CA, GNB2, KCNQ1, CAMK4, BCL2, KRAS, KCNQ5, ATF4	2430	114	10427	1.35504	1	0.1299	0.0952106
KEGG_PATHWAY	ccad00290:Valine, leucine and isoleucine biosynthesis	4	0.0755858	0.0417008	SDS, BCAT1, SDSL, BCAT2	2430	4	10427	4.29095	1	0.1299	0.0952106
GOTERM_BP_DIRECT	GO:0006890~retrograde vesicle-mediated transport, Golgi to endoplasmic reticulum	11	0.207861	0.0417337	COPB2, GOLPH3, TMEM115, RER1, STX18, GOLPH3L, SEC22B, ERGIC2, ERGIC1, COPZ1, ARCN1	3832	24	15999	1.91359	1	1	0.999547
GOTERM_CC_DIRECT	GO:0010008~endosome membrane	8	0.151172	0.0421084	SNX1, ACAP2, SNX2, RAB35, PLEKHM2, ABHD17C, TPCN1, APPL1	3619	15	15361	2.26376	1	0.815685	0.799038
GOTERM_CC_DIRECT	GO:0005764~lysosome	27	0.510204	0.0428056	SCARB2, MARCHF1, CTSW, CLN5, FYCO1, CLN3, NEU3, CTSO, AP5M1, SMPD1, AGA, CTSD, CD164, NAPSA, FUCA2, EPDR1, TMEM175, ELAPOR1, RAB32, TMEM59, RRAGA, RRAGC, NAAA, PPT1, RAB9A, PPT2, RAB7A	3619	80	15361	1.43253	1	0.815685	0.799038
GOTERM_MF_DIRECT	GO:0031491~nucleosome binding	10	0.188964	0.0431427	SUPT16H, LOC122455291, LOC122454877, EED, HP1BP3, PWWP3A, SSRP1, ARID1A, SUPT6H, ARID1B	3930	21	16442	1.99225	1	1	0.997165
GOTERM_MF_DIRECT	GO:0005096~GTPase activator activity	41	0.774754	0.0435533	DOCK5, DOCK3, LOC122429801, RGS14, ARHGAP19, ARHGAP17, IQGAP1, IQGAP3, FLCN, SIPA1L1, CHN2, TBC1D17, ECT2, SEC23B, TBC1D22A, RAP1GAP2, RANBP2, RANBP1, RALBP1, STARD13, RANBP3, ELMOD2, RALGAPA2, ARAP2, TSC2, RANGAP1, ADAP1, MYO9A, ARHGAP31, ACAP2, TBC1D20, RABEP2, RP2, TBC1D5, DLC1, TBC1D25, SMCR8, PREB, DOCK2, SMAP2, RAB3GAP1	3930	130	16442	1.31948	1	1	0.997165
KEGG_PATHWAY	ccad01240:Biosynthesis of cofactors	48	0.907029	0.0435851	LIPT2, MOCS2, PDXK, ALAS2, SHMT2, AK2, AK4, MAT2B, PPOX, LIAS, AK6, AK7, PPCDC, ALAD, NFS1, UGP2, MAT2A, MTHFD1L, RDH11, UROD, RFK, RDH13, GUSB, LOC122446050, GCH1, PMM2, NME2, CTPS2, NME3, GGH, DHODH, DHFR, COQ3, NMNAT1, NME6, LOC122446657, MTHFD2, HMBS, CMPK1, ADSS1, ADSS2, BCAT1, UMPS, GCLM, MOCS1, DLD, BCAT2, IDO1	2430	160	10427	1.28728	1	0.134578	0.0986399
GOTERM_MF_DIRECT	GO:0070530~K63-linked polyubiquitin modification-dependent protein binding	7	0.132275	0.0443973	TNIP2, UIMC1, OTUD7B, TNFAIP3, TAB2, SQSTM1, OPTN	3930	12	16442	2.4405	1	1	0.997165
GOTERM_MF_DIRECT	GO:0000287~magnesium ion binding	30	0.566893	0.0447752	FEN1, MAST4, GTPBP10, THG1L, RPS6KA4, THTPA, RPS6KA3, SRR, LOC122437104, PGM2, HACL1, MAP3K7, AASDHPPT, PGM1, PKLR, ATP8B2, IDH3G, ATP8B1, ITPK1, IDH2, ATP11B, ATP11A, IRAK4, PPM1B, NUDT7, PKM, PPA2, PPA1, HPRT1, FARSB	3930	90	16442	1.39457	1	1	0.997165
GOTERM_MF_DIRECT	GO:0035312~5'-3' DNA exonuclease activity	4	0.0755858	0.0447787	DCLRE1B, DCLRE1A, DCLRE1C, EXO1	3930	4	16442	4.18372	1	1	0.997165
GOTERM_BP_DIRECT	GO:0033554~cellular response to stress	7	0.132275	0.044809	PRDX4, PRDX1, REL, RELA, MAP3K5, NFKB2, RELB	3832	12	15999	2.43548	1	1	0.999547
GOTERM_BP_DIRECT	GO:0045071~negative regulation of viral genome replication	7	0.132275	0.044809	ISG20, LOC122431080, RNASEL, LOC122431078, LOC122431079, LOC122430804, LOC122431250	3832	12	15999	2.43548	1	1	0.999547
GOTERM_BP_DIRECT	GO:0030242~autophagy of peroxisome	4	0.0755858	0.0450347	ACBD5, RB1CC1, PIK3R4, PIK3C3	3832	4	15999	4.1751	1	1	0.999547
GOTERM_BP_DIRECT	GO:0032784~regulation of DNA-templated transcription elongation	4	0.0755858	0.0450347	LOC122444987, THOC1, ZNF326, SUPT5H	3832	4	15999	4.1751	1	1	0.999547
GOTERM_BP_DIRECT	GO:0007007~inner mitochondrial membrane organization	4	0.0755858	0.0450347	CHCHD3, TAFAZZIN, TMEM11, MAIP1	3832	4	15999	4.1751	1	1	0.999547
GOTERM_BP_DIRECT	GO:0031848~protection from non-homologous end joining at telomere	4	0.0755858	0.0450347	DCLRE1B, DCLRE1A, DCLRE1C, TERF2	3832	4	15999	4.1751	1	1	0.999547
GOTERM_MF_DIRECT	GO:0003676~nucleic acid binding	63	1.19048	0.0454273	TUT4, PINX1, GPATCH2, GPATCH3, YBX1, TSEN2, YBX3, ZCCHC14, NARS1, ENPP2, ZNF385B, ENPP1, SCAPER, CMTR1, ZNF385A, HEMK1, REXO1, RNASE6, DARS2, AEN, RNASE4, LOC122453807, LOC122437131, CSDE1, SNRNP200, POLR1H, DDX28, EXD2, ZCCHC7, LOC122454388, AARS1, RBM48, DDX1, SRRT, TRMT2A, RECQL4, RECQL5, ZMAT3, ERI2, HLTF, DNAJC21, RBBP6, POLR2I, TTC14, SPAG7, SF3A2, HELQ, TREX1, LOC122423112, SREK1IP1, EXOG,…	3930	213	16442	1.23744	1	1	0.997165
KEGG_PATHWAY	ccad03050:Proteasome	20	0.377929	0.0460105	LOC122453267, PSMD12, PSMD13, PSMA7, PSMB8, PSMB9, PSMA5, PSMB7, PSMC5, PSMD6, PSMD7, PSMA4, PSMD4, PSMB3, PSMC1, PSMD2, PSMB1, PSME2, LOC122434167, PSMF1	2430	56	10427	1.53248	1	0.140832	0.103223
KEGG_PATHWAY	ccad04146:Peroxisome	29	0.547997	0.0475297	ECI2, PEX11B, PRDX5, SCP2, PRDX1, NUDT19, HACL1, ACAA1, DECR2, HAO2, PEX16, PHYH, PEX19, LOC122431993, ACSL1, ECH1, IDH2, PEX1, SOD2, PEX14, SOD1, GNPAT, NUDT7, PEX6, EHHADH, PXMP2, FAR1, FAR2, SLC27A2	2430	89	10427	1.39817	1	0.144228	0.105713
KEGG_PATHWAY	ccad04360:Axon guidance	56	1.0582	0.0484384	ITGB1, NRP1, BMPR2, PIK3CD, PPP3CA, RGS3, DPYSL2, CFL1, RAC2, PLXNC1, RAC1, NCK1, SEMA6C, RHOA, PIK3CA, RASA1, RAF1, MET, EPHA2, CAMK2D, SEMA7A, ROCK1, SRC, GNAI3, CXCR4, PIK3R1, GNAI1, GNAI2, CDC42, EFNB1, PPP3R1, PARD6B, PLCG2, ABL1, MAPK1, FYN, SLIT3, PLCG1, SRGAP2, PAK3, LOC122425824, PAK2, MAPK3, PTCH1, SEMA4B, NFATC3, NFATC2, PTPN11, SEMA4G, SSH2, SSH3, PTK2, FES, PLXNB3, KRAS, PLXNB1	2430	192	10427	1.25153	1	0.145729	0.106813
KEGG_PATHWAY	ccad05140:Leishmaniasis	30	0.566893	0.0493486	ITGB1, LOC122429366, ITGAM, LOC122424037, LOC122429106, LOC122435269, RELA, LOC122431989, MAPK1, LOC122429902, LOC122420817, JAK2, MAP3K7, MAPK3, JAK1, LOC122429972, LOC122432303, TGFB1, ITGA4, STAT1, PRKCB, IFNGR1, IFNGR2, IRAK4, MAPK14, EEF1A1, TRAF6, PTPN6, TAB2, TAB1	2430	93	10427	1.38418	1	0.147209	0.107898
KEGG_PATHWAY	ccad00310:Lysine degradation	27	0.510204	0.0501412	KMT2D, SUV39H2, SETD2, ECHS1, EHMT2, SUV39H1, PLOD3, PRDM2, PLOD1, ACAT2, ACAT1, DHTKD1, PRDM16, SMYD1, KMT5B, SMYD3, AASS, SETDB1, PHYKPL, SETD1B, SETD1A, BBOX1, LOC122452979, TMLHE, EHHADH, DLD, ALDH7A1	2430	82	10427	1.41287	1	0.148317	0.10871
KEGG_PATHWAY	ccad03030:DNA replication	15	0.283447	0.0516418	RFC5, FEN1, PCNA, RNASEH2A, MCM7, RFC2, RPA2, POLD3, POLE4, POLA1, POLA2, POLD2, POLE3, DNA2, MCM6	2430	39	10427	1.65036	1	0.151483	0.11103
KEGG_PATHWAY	ccad05142:Chagas disease	36	0.680272	0.0522632	C1QA, GNAI3, PIK3CD, CD3G, LOC122449214, FASLG, PPP2R2A, PIK3R1, RELA, GNAI1, GNAI2, PPP2CA, LOC122444227, MAPK9, MAPK8, CASP8, PPP2R1A, AKT2, MAPK1, AKT1, FADD, MAPK3, MAP2K4, TGFB1, CHUK, IFNGR1, IFNGR2, IRAK4, MAPK14, TGFBR2, GNAO1, PLCB3, PLCB4, PIK3CA, TRAF6, TLR6	2430	116	10427	1.33167	1	0.152038	0.111437
GOTERM_MF_DIRECT	GO:0000149~SNARE binding	17	0.32124	0.0526201	STX12, SEC24B, LOC122454757, STX16, STX7, TNFAIP2, SYT9, STX11, VAMP7, SYT11, VTI1A, STX5, STX4, STX3, SEC24C, VTI1B, PICALM	3930	45	16442	1.58051	1	1	0.997165
GOTERM_CC_DIRECT	GO:0005789~endoplasmic reticulum membrane	70	1.32275	0.0527392	PIGO, PIGN, SLC35B1, MIA2, WASL, TRAM2, SEC62, SLC37A3, TAPT1, DGAT2, ELOVL4, RSAD2, ALG6, ELOVL5, RHBDF2, LOC122433058, TAP2, IRAG2, ALG11, SLC35G1, TMEM170A, DDOST, DPM1, PIGB, TBC1D20, PREB, SELENOT, SEC22B, SLC27A2, ERGIC1, SLC27A4, GRAMD1A, SAMD8, DERL1, RRBP1, SGMS2, SELENOK, HSD17B7, HACD3, HACD2, SELENOI, LMF1, DNAJB2, LMAN1, ORMDL2, VTI1A, SARAF, SSR1, CEPT1, RCE1, MARCHF6, VTI1B, BCAP31…	3619	245	15361	1.21273	1	0.939494	0.92032
KEGG_PATHWAY	ccad04934:Cushing syndrome	48	0.907029	0.0528985	RB1, KMT2D, SCARB1, CAMK2D, CDKN1A, WNT2B, ATF6B, TCF7, GNAI3, ADCY3, WNT8B, ITPR2, ITPR3, ASH2L, AHR, GNAI1, GNAI2, RAP1B, RAP1A, RBBP5, CREB3L2, WDR5, MAPK1, LDLR, PRKACB, MAPK3, USP8, CDKN2B, MAP2K1, FZD4, AXIN1, FZD9, ARNT, AXIN2, PBX1, NR4A1, PLCB3, NCEH1, ADCY9, PLCB4, ARMC5, STAR, APC, CDK4, CCNE1, SP1, ORAI1, ATF4	2430	162	10427	1.27139	1	0.152625	0.111867
GOTERM_CC_DIRECT	GO:0005637~nuclear inner membrane	10	0.188964	0.0534114	TMEM120B, TMEM201, P2RX5, DPY19L3, TMEM43, DPY19L4, P2RX1, LEMD3, LEMD2, LBR	3619	22	15361	1.92934	1	0.939494	0.92032
GOTERM_CC_DIRECT	GO:0072686~mitotic spindle	10	0.188964	0.0534114	EML4, ESPL1, CKAP2L, EFHC1, SKA1, CLASP1, CDC14A, SPOUT1, MAD1L1, EML2	3619	22	15361	1.92934	1	0.939494	0.92032
KEGG_PATHWAY	ccad04613:Neutrophil extracellular trap formation	60	1.13379	0.0546188	ITGAM, LOC122423300, PIK3CD, ITGAL, ACTB, AKT2, RAC2, AKT1, LOC122440602, RAC1, MAP3K7, LOC122422040, MAP2K1, SYK, PRKCB, PLCB3, PLCB4, PIK3CA, HAT1, VDAC3, VDAC2, VDAC1, PADI4, SLC25A5, RAF1, SLC25A4, SLC25A6, LOC122424250, HDAC2, SELPLG, LOC122429189, HDAC1, SRC, LOC122435269, C5AR1, LOC122429182, PIK3R1, LOC122429181, LOC122429188, CLCN3, HDAC9, LOC122424293, LOC122429186, RELA, HDAC6, LOC1224…	2430	209	10427	1.23185	1	0.156308	0.114566
GOTERM_CC_DIRECT	GO:0008021~synaptic vesicle	19	0.359033	0.0559566	STX12, SEPTIN2, RAB3D, STX7, TPRG1L, SEPTIN5, CLCN3, BTBD8, SYN2, STX11, CLCN5, SYPL1, BIN1, STX3, LOC122441658, RAB8A, RAB8B, CDK16, PICALM	3619	53	15361	1.52163	1	0.959655	0.94007
KEGG_PATHWAY	ccad01230:Biosynthesis of amino acids	27	0.510204	0.0573755	GOT1L1, SHMT2, MTR, MAT2B, SDSL, MAT2A, PGK1, LOC122434077, SDS, TPI1, PKLR, ARG1, IDH3G, PGAM1, IDH2, GOT2, TALDO1, PYCR2, PYCR3, RPIA, PFKL, PKM, CTH, BCAT1, ALDOA, GAPDH, BCAT2	2430	83	10427	1.39585	1	0.161687	0.118509
KEGG_PATHWAY	ccad00510:N-Glycan biosynthesis	21	0.396825	0.0578766	B4GALT1, ALG6, SRD5A3, RPN1, ALG2, ALG11, MAGT1, DDOST, DPM1, FUT8, LOC122436496, TMEM258, MAN2A1, MGAT5, DOLPP1, OSTC, MAN1C1, STT3A, MGAT3, MAN1A1, MGAT2	2430	61	10427	1.47721	1	0.161687	0.118509
KEGG_PATHWAY	ccad01212:Fatty acid metabolism	21	0.396825	0.0578766	CPT1A, ECHS1, ACAA2, ELOVL4, ELOVL5, ACSL1, TECR, HACD3, HACD2, CPT1B, ACAT2, ACAT1, FADS2, SCP2, SCD, EHHADH, FASN, PPT1, PPT2, ACAA1, CBR4	2430	61	10427	1.47721	1	0.161687	0.118509
GOTERM_BP_DIRECT	GO:0015031~protein transport	16	0.302343	0.0581979	LOC122425483, ARRDC4, TSG101, LOC122445288, COG2, RRBP1, SCAMP3, SCAMP2, RUFY1, UEVLD, SCAMP4, SNX18, CHMP1B, CHMP1A, CHMP2A, ARL8B	3832	42	15999	1.59052	1	1	0.999547
GOTERM_BP_DIRECT	GO:0007229~integrin-mediated signaling pathway	16	0.302343	0.0581979	ITGB1, SEMA7A, FYB1, ITGAM, ITGA4, ITGA1, ITGAL, FGR, TEC, LOC122433255, ZYX, ITGA7, ITGAV, ITGA5, ITGA9, FERMT3	3832	42	15999	1.59052	1	1	0.999547
GOTERM_BP_DIRECT	GO:0030968~endoplasmic reticulum unfolded protein response	10	0.188964	0.0586448	HERPUD2, PARP6, TBL2, ATF6B, OS9, HSPA5, AMFR, DERL1, TMTC4, PARP8	3832	22	15999	1.89777	1	1	0.999547
GOTERM_BP_DIRECT	GO:0045893~positive regulation of DNA-templated transcription	27	0.510204	0.0588227	RNF13, WBP2, CXXC1, GPATCH3, ING5, EDRF1, SERTAD3, RNF115, LBH, MSANTD1, MED30, NUP85, TBX21, TP53INP1, TRIM45, AFAP1L2, SMARCC1, SMARCC2, CHURC1, BICRAL, TFEB, DYRK1A, TRIP4, DYRK1B, ARID1A, ARID1B, RNF167	3832	81	15999	1.3917	1	1	0.999547
KEGG_PATHWAY	ccad05231:Choline metabolism in cancer	32	0.604686	0.059391	SLC22A5, SLC44A2, DGKA, WAS, PIK3CD, PIK3R1, PLD1, HIF1A, MAPK9, MAPK8, AKT2, RAC2, EIF4EBP1, MAPK1, PIP5K1A, AKT1, PLCG1, RAC1, PIP5K1C, WASF2, MAPK3, LYPLA1, MAP2K1, CHKB, PRKCB, TSC2, TSC1, PIK3CA, RHEB, SP1, KRAS, RAF1	2430	102	10427	1.34618	1	0.162884	0.119387
KEGG_PATHWAY	ccad04122:Sulfur relay system	6	0.113379	0.0596935	MPST, CTU2, MOCS2, NFS1, LOC122420650, LOC122421547	2430	10	10427	2.57457	1	0.162884	0.119387
KEGG_PATHWAY	ccad00920:Sulfur metabolism	6	0.113379	0.0596935	MPST, SELENBP1, BPNT2, BPNT1, PAPSS2, PAPSS1	2430	10	10427	2.57457	1	0.162884	0.119387
GOTERM_CC_DIRECT	GO:0031901~early endosome membrane	8	0.151172	0.0600361	ZFYVE28, MARCHF1, SNX19, SNX25, WDR91, SNX12, PMEPA1, LOC122440811	3619	16	15361	2.12227	1	0.971268	0.951446
KEGG_PATHWAY	ccad04330:Notch signaling pathway	22	0.415722	0.0610719	NOTCH2, TLE4, PSENEN, TLE3, LOC122452850, HDAC2, TLE2, NOTCH1, MAML1, CTBP1, HDAC1, DTX2, DTX3, PSEN1, KAT2B, ADAM17, ITCH, SNW1, APH1B, ATXN1, MFNG, NUMB	2430	65	10427	1.45232	1	0.165091	0.121004
GOTERM_BP_DIRECT	GO:0031124~mRNA 3'-end processing	5	0.0944822	0.0611901	CSTF3, CSTF2, CSTF1, RPRD1A, RPRD2	3832	7	15999	2.98222	1	1	0.999547
GOTERM_MF_DIRECT	GO:0008320~protein transmembrane transporter activity	9	0.170068	0.0613896	SEC61A1, LOC122454255, TOMM40, TIMM17A, TIMM17B, LOC122454429, TOMM20, TOMM40L, SEC63	3930	19	16442	1.98176	1	1	0.997165
KEGG_PATHWAY	ccad03018:RNA degradation	29	0.547997	0.0614401	ZCCHC7, BTG2, BTG1, DIS3L, EXOSC7, EDC4, EXOSC5, NUDT16, DCPS, HSPA9, DIS3, CNOT10, PATL1, LSM2, PAN2, LSM8, PFKL, LSM6, CNOT7, PAN3, XRN1, CNOT1, CNOT2, CNOT3, XRN2, PABPC1, CNOT8, CNOT9, MPHOSPH6	2430	91	10427	1.36744	1	0.165091	0.121004
GOTERM_CC_DIRECT	GO:0032588~trans-Golgi network membrane	7	0.132275	0.0621946	SCAMP4, AFTPH, TMEM79, PLD4, ARFIP1, SCAMP3, SCAMP2	3619	13	15361	2.28552	1	0.971268	0.951446
GOTERM_CC_DIRECT	GO:0016514~SWI/SNF complex	7	0.132275	0.0621946	SMARCC1, SMARCD2, SMARCC2, BICRAL, ACTL6A, ARID1A, ARID1B	3619	13	15361	2.28552	1	0.971268	0.951446
GOTERM_CC_DIRECT	GO:0005684~U2-type spliceosomal complex	6	0.113379	0.0622971	SF3B2, MFAP1, CCDC12, LOC122423898, HTATSF1, YJU2B	3619	10	15361	2.54673	1	0.971268	0.951446
KEGG_PATHWAY	ccad05214:Glioma	26	0.491308	0.0630804	RB1, CAMK2D, CDKN1A, SHC1, ARAF, PTEN, PIK3CD, TGFA, LOC122427080, PIK3R1, AKT2, PLCG2, MAPK1, AKT1, BAK1, PLCG1, MAPK3, MAP2K1, PRKCB, PIK3CA, CDK4, CAMK4, BAX, KRAS, RAF1, TP53	2430	80	10427	1.39456	1	0.168214	0.123294
GOTERM_MF_DIRECT	GO:0003755~peptidyl-prolyl cis-trans isomerase activity	17	0.32124	0.0633864	FKBP11, RANBP2, LOC122432636, PPIL1, PPIL2, FKBP15, CWC27, PTPA, PIN1, PPIH, PIN4, PPIG, PPIL3, PPIB, PPIA, FKBP5, NKTR	3930	46	16442	1.54616	1	1	0.997165
GOTERM_MF_DIRECT	GO:0008017~microtubule binding	48	0.907029	0.0641482	CEP57, NUMA1, RGS14, TRAF3IP1, KATNB1, ABRAXAS2, KIF11, WASL, SKA1, KIF15, OPA1, MAP2, KIF13A, KIF1A, MAP4, GAS2L2, GTSE1, DLGAP5, CLASP1, SPAG8, DST, CRIPT, KIF24, HAUS6, KIF23, RMDN2, KIF22, HOOK3, RMDN1, KIF7, FHDC1, KIF27, DCLK1, EML2, EML4, CCDC88B, KIF9, KIF18A, DIAPH2, KIF18B, APC, KIF2A, KATNBL1, HOOK1, KIF4A, REEP2, CCDC88C, CCDC170	3930	160	16442	1.25511	1	1	0.997165
GOTERM_MF_DIRECT	GO:0043015~gamma-tubulin binding	8	0.151172	0.0643202	CEP57, NEDD1, TUBGCP2, CEP70, TUBGCP5, TUBGCP6, TUBGCP3, WASHC1	3930	16	16442	2.09186	1	1	0.997165
GOTERM_CC_DIRECT	GO:0031966~mitochondrial membrane	11	0.207861	0.0643709	GNPAT, SLC25A37, RNF144B, SLC25A28, OPA1, GPAM, TAFAZZIN, SLC25A10, SDHB, TMEM70, SLC25A14	3619	26	15361	1.79577	1	0.981299	0.961272
KEGG_PATHWAY	ccad04114:Oocyte meiosis	42	0.793651	0.0649155	YWHAE, CAMK2D, YWHAB, ADCY3, ITPR2, ITPR3, SMC3, PKMYT1, PPP2CA, PPP1CC, RPS6KA3, PPP3CA, PPP3R1, CDC23, PPP2R1A, PPP2R5E, CDC27, MAPK1, BTRC, PRKACB, YWHAG, MAPK3, SKP1, MAP2K1, FBXW11, PPP2R5B, PPP2R5A, PPP2R5D, CDC25C, MAPK14, SMC1A, YWHAZ, PPP1CA, SGO1, CPEB1, ADCY9, ESPL1, STAG3, CCNE1, ANAPC4, ANAPC1, MAD1L1	2430	141	10427	1.27815	1	0.170943	0.125294
GOTERM_BP_DIRECT	GO:0034620~cellular response to unfolded protein	8	0.151172	0.0649466	HSPA9, HSPA8, LOC122430139, HSPA5, LOC122423465, LOC122430140, LOC122428193, HSPA13	3832	16	15999	2.08755	1	1	0.999547
GOTERM_BP_DIRECT	GO:0030866~cortical actin cytoskeleton organization	8	0.151172	0.0649466	NCKAP1, FMNL2, ROCK1, EPB41, EPB41L1, FHOD1, EPB41L2, NCKAP1L	3832	16	15999	2.08755	1	1	0.999547
KEGG_PATHWAY	ccad03008:Ribosome biogenesis in eukaryotes	36	0.680272	0.0650749	POP5, NVL, POP4, WDR3, HEATR1, NXT2, PWP2, AK6, WDR43, NOL6, NXF1, LOC122436231, XPO1, TCOF1, GAR1, UTP14A, NOP56, NOP58, UTP6, REXO1, UTP4, CSNK2A1, IMP3, EFL1, WDR75, IMP4, UTP18, RPP25L, RCL1, GNL3L, XRN1, CSNK2B, XRN2, SBDS, MPHOSPH10, RPP25	2430	118	10427	1.3091	1	0.170943	0.125294
GOTERM_MF_DIRECT	GO:0051879~Hsp90 protein binding	6	0.113379	0.0658347	UNC45A, PTGES3, TTC4, PTGES3L, PPEF2, TELO2	3930	10	16442	2.51023	1	1	0.997165
GOTERM_MF_DIRECT	GO:0080025~phosphatidylinositol-3,5-bisphosphate binding	6	0.113379	0.0658347	HIP1, WDR45B, SNX14, PLEKHA5, WIPI1, WIPI2	3930	10	16442	2.51023	1	1	0.997165
GOTERM_MF_DIRECT	GO:0015026~coreceptor activity	7	0.132275	0.0661849	LOC122424805, CD4, RAMP3, CD80, ACKR3, CXCR6, RGMB	3930	13	16442	2.25277	1	1	0.997165
GOTERM_MF_DIRECT	GO:0016616~oxidoreductase activity, acting on the CH-OH group of donors, NAD or NADP as acceptor	7	0.132275	0.0661849	UEVLD, CTBP1, IDH3G, RDH10, HSD17B11, CBR4, GLYR1	3930	13	16442	2.25277	1	1	0.997165
GOTERM_MF_DIRECT	GO:0043138~3'-5' DNA helicase activity	7	0.132275	0.0661849	RECQL4, BLM, RECQL5, ERCC3, FANCM, DHX9, LOC122422743	3930	13	16442	2.25277	1	1	0.997165
GOTERM_BP_DIRECT	GO:0006611~protein export from nucleus	6	0.113379	0.0663495	RANBP3, XPO1, XPO6, CSE1L, XPO5, XPO7	3832	10	15999	2.50506	1	1	0.999547
GOTERM_BP_DIRECT	GO:0043001~Golgi to plasma membrane protein transport	6	0.113379	0.0663495	NSF, GOLPH3, SYS1, GOLPH3L, GOLGA7, BLZF1	3832	10	15999	2.50506	1	1	0.999547
GOTERM_BP_DIRECT	GO:0006646~phosphatidylethanolamine biosynthetic process	6	0.113379	0.0663495	PCYT2, CHKB, ETNK1, CEPT1, SELENOI, PISD	3832	10	15999	2.50506	1	1	0.999547
GOTERM_BP_DIRECT	GO:0070936~protein K48-linked ubiquitination	6	0.113379	0.0663495	ITCH, AMFR, FBXO38, UBE2D2, RNF8, RFFL	3832	10	15999	2.50506	1	1	0.999547
GOTERM_BP_DIRECT	GO:0071363~cellular response to growth factor stimulus	7	0.132275	0.066767	ACVRL1, BMPR2, ACVR1B, ACVR2B, ACVR2A, TGFBR2, BMPR1A	3832	13	15999	2.24813	1	1	0.999547
GOTERM_BP_DIRECT	GO:0030097~hemopoiesis	7	0.132275	0.066767	SELPLG, IL7R, JAK2, RUNX3, RUNX2, JAK1, RUNX1	3832	13	15999	2.24813	1	1	0.999547
GOTERM_CC_DIRECT	GO:0000922~spindle pole	13	0.245654	0.0675483	PLK3, NUMA1, TUBGCP2, PLK2, WDR73, CDC14A, NEDD1, ASPM, LATS2, TUBGCP5, TUBGCP6, TUBGCP3, CEP44	3619	33	15361	1.67209	1	1	0.981022
GOTERM_BP_DIRECT	GO:0008360~regulation of cell shape	14	0.26455	0.0689893	RDX, PALM3, RHOG, MSN, FMNL2, RHOT1, PLXNB3, PLXNB1, RAC1, PLXNC1, NF2, EZR, MET, BRWD3	3832	36	15999	1.62365	1	1	0.999547
GOTERM_BP_DIRECT	GO:0007015~actin filament organization	25	0.472411	0.0696275	HIP1, WAS, LOC122435468, BRK1, WASL, CORO1A, CORO1B, PPP1R9B, LOC122431989, LOC122421209, SAMD14, RHOT1, TMSB4X, RAC1, TPM4, TPM3, TPM2, TPM1, RHOG, MYO5A, MYO19, MARCKS, MYO5B, MYO5C, ELMO3	3832	75	15999	1.3917	1	1	0.999547
KEGG_PATHWAY	ccad05016:Huntington disease	102	1.92744	0.0708262	PSMD6, PSMD7, PSMD4, PSMD2, TUBB1, CREB3L2, MAP3K5, LOC122427612, SDHD, SDHA, SDHB, ERN1, VDAC3, VDAC2, TFAM, LOC122421476, TBPL1, ULK2, ULK1, LOC122427613, LOC122455265, VDAC1, LOC122421478, TP53, PSMD12, PSMD13, ATP5MC2, PIK3R4, ATP5MC3, LOC122424937, KLC4, NRBF2, LOC122426544, LOC122431334, LOC122432541, LOC122426664, SP1, ATG2A, LOC122434167, DNAL4, RCOR1, DNAL1, ATG2B, HIP1, CLTC, AP2A1, AP2…	2430	380	10427	1.15178	1	0.184673	0.135357
GOTERM_BP_DIRECT	GO:0007052~mitotic spindle organization	11	0.207861	0.0709093	PTPA, DCTN2, CENPH, KIF4A, TACC3, EFHC1, TACC1, KIF22, KIF7, DLGAP5, KIF27	3832	26	15999	1.76639	1	1	0.999547
GOTERM_MF_DIRECT	GO:0003779~actin binding	32	0.604686	0.0709256	GMFB, TLNRD1, EPB41, WIPF1, WAS, WASL, CNN3, EPS8, PDLIM2, EPB41L1, EPB41L2, LOC122426218, LPXN, WHAMM, PDLIM5, WASHC1, WASF2, VPS16, PHACTR4, RDX, MSN, PARVB, SSH2, FHDC1, SSH3, DIAPH2, SPATA32, SPIRE2, EVL, NF2, PFN1, EZR	3930	101	16442	1.32553	1	1	0.997165
GOTERM_BP_DIRECT	GO:0051726~regulation of cell cycle	13	0.245654	0.0751678	USP16, LOC122433413, TSC2, LOC122439416, LOC122427080, TSC1, LIN9, CABLES2, SON, TFDP1, TFDP2, PCLAF, FBXL3	3832	33	15999	1.64474	1	1	0.999547
GOTERM_CC_DIRECT	GO:0005884~actin filament	14	0.26455	0.0751823	DBNL, TPM4, TPM3, TPM2, TPM1, TWF2, LOC122435468, FHDC1, AIF1, PSTPIP1, DIAPH2, COTL1, PLS3, GAS2L2	3619	37	15361	1.60604	1	1	0.981022
GOTERM_CC_DIRECT	GO:0031902~late endosome membrane	9	0.170068	0.075918	MARCHF1, PIP4P1, WDR91, VTI1A, LOC122429902, ATP13A3, VPS36, RMC1, VTI1B	3619	20	15361	1.91004	1	1	0.981022
KEGG_PATHWAY	ccad04014:Ras signaling pathway	68	1.28496	0.076477	PIK3CD, FASLG, ETS1, RASSF5, AKT2, RAC2, AKT1, RAC1, PRKACB, RALBP1, MAP2K1, CHUK, PRKCB, RALGAPA2, FLT3LG, LOC122441383, RHOA, TIAM1, RASA3, PIK3CA, RASA1, KIT, RAF1, MET, EXOC2, EPHA2, ARF6, RALA, RAB5B, RAB5C, RALB, SHC1, TGFA, FOXO4, PIK3R1, RASAL3, PLA2G6, PLD1, RASGRP1, RELA, RASGRP3, RAP1B, CDC42, LOC122444227, MAPK9, GNG10, MAPK8, RAP1A, PLCG2, ABL1, MAPK1, SHOC2, PLCG1, PAK3, PAK2, MAPK3…	2430	245	10427	1.19096	1	0.197941	0.145081
GOTERM_BP_DIRECT	GO:0002682~regulation of immune system process	15	0.283447	0.0767548	ZBTB17, LOC122431699, ZBTB38, ZBTB1, LOC122420196, ZNF26, LOC122420513, LOC122420204, LOC122420213, LOC122420201, LOC122440466, LOC122420023, LOC122424239, ZNF787, GZF1	3832	40	15999	1.56566	1	1	0.999547
KEGG_PATHWAY	ccad05225:Hepatocellular carcinoma	52	0.982615	0.0779132	RB1, CDKN1A, WNT2B, PTEN, ARAF, PIK3CD, ACTB, MYC, AKT2, AKT1, SMARCC1, MAP2K1, SMARCC2, PRKCB, ACTL6A, AXIN1, AXIN2, ARID1A, ARID1B, TGFBR2, PIK3CA, RAF1, MET, TP53, SMARCD2, SHC1, TCF7, LRP5, WNT8B, TGFA, PIK3R1, TERT, PLCG2, MAPK1, BAK1, PLCG1, MAPK3, SMAD3, TGFB1, TXNRD3, TXNRD2, CSNK1A1, FZD4, BAD, TXNRD1, IGF2, FZD9, SMARCA2, APC, CDK4, BAX, KRAS	2430	182	10427	1.22598	1	0.200186	0.146727
GOTERM_MF_DIRECT	GO:0003684~damaged DNA binding	12	0.226757	0.0809376	DCLRE1B, DCLRE1A, XRCC6, DCLRE1C, ERCC4, XNDC1N, XRCC1, XPC, NBN, NEIL1, RAD23B, POLH	3930	30	16442	1.67349	1	1	0.997165
KEGG_PATHWAY	ccad05216:Thyroid cancer	16	0.302343	0.0815116	MAP2K1, CDKN1A, TPM3, NCOA4, TCF7, LOC122435468, MYC, TPR, CCDC6, BAX, MAPK1, KRAS, PPARG, BAK1, TP53, MAPK3	2430	45	10427	1.52567	1	0.207914	0.152391
GOTERM_BP_DIRECT	GO:0007249~canonical NF-kappaB signal transduction	9	0.170068	0.082425	NFKBIL1, REL, BCL10, AZI2, TANK, RELA, FAIM, NFKB2, RELB	3832	20	15999	1.8788	1	1	0.999547
KEGG_PATHWAY	ccad05020:Prion disease	92	1.73847	0.0857139	LOC122423465, PIK3CD, LOC122428193, LAMC1, CASP9, PPP3CA, PSMD6, TUBA1B, PSMD7, LOC122441612, PSMD4, PSMD2, TUBB1, CREB3L2, RAC2, RAC1, PRKACB, CSNK2A1, LOC122427612, TUBB, PRKCD, SDHD, SDHA, SDHB, PSMA5, PSMA4, NDUFS8, PIK3CA, NDUFS6, CSNK2B, NDUFS4, LOC122430140, VDAC3, LOC122421476, VDAC2, LOC122427613, LOC122455265, VDAC1, LOC122421478, SLC25A5, SLC25A4, ATF4, SLC25A6, C1QA, PSMD12, LOC122430…	2430	343	10427	1.15092	1	0.21706	0.159095
GOTERM_MF_DIRECT	GO:0031625~ubiquitin protein ligase binding	19	0.359033	0.0868792	CUL9, GABARAPL2, DET1, CUL7, GABARAPL1, LOC122430139, CUL5, CUL2, ERLIN1, NEDD8, TRAF1, CUL4A, MAP1LC3B, NPLOC4, UBB, UBC, LOC122430140, UBA52, CCDC50	3930	55	16442	1.44528	1	1	0.997165
GOTERM_MF_DIRECT	GO:0042162~telomeric DNA binding	8	0.151172	0.0875258	XRCC6, TEN1, TERT, TINF2, SMG7, SMG5, TELO2, SMG6	3930	17	16442	1.96881	1	1	0.997165
GOTERM_MF_DIRECT	GO:0004521~RNA endonuclease activity	8	0.151172	0.0875258	RCL1, ERN1, ZC3H12D, ZC3H12C, RNASEK, SLFN14, ZC3H12A, EXOG	3930	17	16442	1.96881	1	1	0.997165
GOTERM_CC_DIRECT	GO:0005801~cis-Golgi network	7	0.132275	0.0878091	LRPAP1, TRAPPC6A, TRAPPC6B, KDELR1, SLC35C2, GOSR1, COG3	3619	14	15361	2.12227	1	1	0.981022
GOTERM_CC_DIRECT	GO:0071014~post-mRNA release spliceosomal complex	7	0.132275	0.0878091	ISY1, XAB2, CCDC12, SYF2, CWF19L1, YJU2B, CRNKL1	3619	14	15361	2.12227	1	1	0.981022
GOTERM_BP_DIRECT	GO:0000724~double-strand break repair via homologous recombination	19	0.359033	0.0882841	BLM, STN1, MRE11, MCM8, NSMCE2, RPA2, BRCA1, RAD54B, RECQL4, ZFYVE26, RAD51D, PPP4C, RECQL5, ERCC4, SWI5, NABP2, NABP1, SLX1A, NBN	3832	55	15999	1.44231	1	1	0.999547
GOTERM_BP_DIRECT	GO:0051016~barbed-end actin filament capping	8	0.151172	0.0883364	SVIL, SCIN, GSN, CAPZA1, CAPZA2, TWF2, ADD3, ADD2	3832	17	15999	1.96476	1	1	0.999547
GOTERM_CC_DIRECT	GO:0000923~equatorial microtubule organizing center	4	0.0755858	0.0888146	TUBGCP2, TUBGCP5, TUBGCP6, TUBGCP3	3619	5	15361	3.39563	1	1	0.981022
GOTERM_CC_DIRECT	GO:0070822~Sin3-type complex	4	0.0755858	0.0888146	BRMS1, PHF12, SAP130, SUDS3	3619	5	15361	3.39563	1	1	0.981022
GOTERM_CC_DIRECT	GO:0031209~SCAR complex	4	0.0755858	0.0888146	CYFIP1, NCKAP1, BRK1, NCKAP1L	3619	5	15361	3.39563	1	1	0.981022
KEGG_PATHWAY	ccad00520:Amino sugar and nucleotide sugar metabolism	18	0.340136	0.0910642	GPI, LOC122423043, GALT, UXS1, LOC122429743, GFPT1, PMM2, LOC122454606, LOC122454605, UGP2, GNPDA2, AMDHD2, FPGT, UAP1L1, PGM2, GNPNAT1, PGM1, GNE	2430	53	10427	1.4573	1	0.228961	0.167818
GOTERM_BP_DIRECT	GO:0051085~chaperone cofactor-dependent protein refolding	13	0.245654	0.0918278	HSPA9, HSPA8, LOC122430139, LOC122421195, HSPA5, ST13, LOC122423465, LOC122428193, HSPE1, TOR1B, HSPA13, DNAJB4, LOC122430140	3832	34	15999	1.59636	1	1	0.999547
GOTERM_MF_DIRECT	GO:0008409~5'-3' exonuclease activity	4	0.0755858	0.0921859	TRIR, FEN1, EXOG, FAN1	3930	5	16442	3.34697	1	1	0.997165
GOTERM_MF_DIRECT	GO:0004791~thioredoxin-disulfide reductase (NADPH) activity	4	0.0755858	0.0921859	TXNRD3, TXNRD2, TXNRD1, SELENOT	3930	5	16442	3.34697	1	1	0.997165
GOTERM_MF_DIRECT	GO:0016494~C-X-C chemokine receptor activity	4	0.0755858	0.0921859	LOC122426699, CXCR3, LOC122426789, CXCR6	3930	5	16442	3.34697	1	1	0.997165
GOTERM_CC_DIRECT	GO:0030126~COPI vesicle coat	6	0.113379	0.0926655	COPB2, COPB1, COPG1, DIPK2A, COPZ1, ARCN1	3619	11	15361	2.31521	1	1	0.981022
GOTERM_BP_DIRECT	GO:0005980~glycogen catabolic process	4	0.0755858	0.0926731	PYGB, AGL, PYGM, PYGL	3832	5	15999	3.34008	1	1	0.999547
GOTERM_BP_DIRECT	GO:0038061~non-canonical NF-kappaB signal transduction	4	0.0755858	0.0926731	REL, RELA, NFKB2, RELB	3832	5	15999	3.34008	1	1	0.999547
GOTERM_BP_DIRECT	GO:0034727~piecemeal microautophagy of the nucleus	4	0.0755858	0.0926731	RB1CC1, ATG2A, ATG7, ATG2B	3832	5	15999	3.34008	1	1	0.999547
GOTERM_BP_DIRECT	GO:0032367~intracellular cholesterol transport	4	0.0755858	0.0926731	STARD4, STAR, NPC2, RELCH	3832	5	15999	3.34008	1	1	0.999547
GOTERM_BP_DIRECT	GO:0006829~zinc ion transport	4	0.0755858	0.0926731	SLC30A7, SLC30A9, SLC39A9, SLC30A5	3832	5	15999	3.34008	1	1	0.999547
GOTERM_BP_DIRECT	GO:0035493~SNARE complex assembly	4	0.0755858	0.0926731	VAMP8, VAMP1, VAMP2, VAMP3	3832	5	15999	3.34008	1	1	0.999547
GOTERM_BP_DIRECT	GO:0035556~intracellular signal transduction	69	1.30385	0.0927609	ITK, MAST4, CAB39L, DGKA, RPS6KA4, RPS6KA3, PREX1, JAK2, JAK1, WSB1, WSB2, SYK, CISH, DAPK1, PRKCE, LOC122441383, NRG1, TYK2, MASTL, NRBP1, VAV1, KCTD9, MELK, ADCY9, RASA3, SPATA13, SIK3, BTK, TSSK6, TSSK3, PRKCQ, LCP2, SIK2, TSSK4, ARHGEF6, CAB39, SHC1, ASB14, ADCY3, PSEN1, PLD1, SOCS2, SOCS3, NUAK2, SOCS1, STK38, SH3BP5, MAPK1, STK38L, ECT2, PAK3, SH2B3, GPR155, PAK2, SOCS7, MAPK3, PLCL2, BMX, …	3832	245	15999	1.17585	1	1	0.999547
GOTERM_MF_DIRECT	GO:0046935~1-phosphatidylinositol-3-kinase regulator activity	7	0.132275	0.0931357	SOCS2, SOCS3, SOCS1, CISH, PIK3R1, SOCS7, PIK3R5	3930	14	16442	2.09186	1	1	0.997165
KEGG_PATHWAY	ccad00670:One carbon pool by folate	9	0.170068	0.0931379	DHFR, MTHFD1L, MTHFD2, SHMT2, AMT, MTR, MTHFS, TYMS, GART	2430	21	10427	1.83898	1	0.230877	0.169222
KEGG_PATHWAY	ccad00531:Glycosaminoglycan degradation	9	0.170068	0.0931379	GALNS, HGSNAT, HYAL1, LOC122454606, IDS, LOC122454605, HPSE, GUSB, ARSB	2430	21	10427	1.83898	1	0.230877	0.169222
GOTERM_CC_DIRECT	GO:0031510~SUMO activating enzyme complex	5	0.0944822	0.0947042	UBA7, UBA6, UBA2, UBA1, SAE1	3619	8	15361	2.65284	1	1	0.981022
GOTERM_CC_DIRECT	GO:0035145~exon-exon junction complex	5	0.0944822	0.0947042	UPF2, BCLAF1, RBM8A, LOC122423495, PYM1	3619	8	15361	2.65284	1	1	0.981022
KEGG_PATHWAY	ccad00563:Glycosylphosphatidylinositol (GPI)-anchor biosynthesis	11	0.207861	0.0950111	PIGS, PIGC, PIGB, PGAP1, PIGO, PIGN, PIGQ, PIGK, PIGM, PIGL, LOC122439451	2430	28	10427	1.68573	1	0.233873	0.171419
KEGG_PATHWAY	ccad05219:Bladder cancer	16	0.302343	0.0959648	RB1, MAP2K1, CDKN1A, DAPK1, SRC, ARAF, LOC122449754, LOC122427080, CDK4, MYC, MAPK1, KRAS, RAF1, TP53, MAPK3, HBEGF	2430	46	10427	1.4925	1	0.234581	0.171937
GOTERM_BP_DIRECT	GO:0016477~cell migration	27	0.510204	0.0970604	ITGB1, DOCK5, NCKAP1, SDC4, SDC3, PIK3CD, TNFAIP3, NEDD9, PIK3C2A, CORO1A, PIK3CG, CORO1B, PODXL, NCKAP1L, LOC122425452, CARMIL2, ARPC5, RHOF, RHOA, VAV1, FMNL2, PIK3CA, APC, CASS4, SDC1, DOCK2, MET	3832	85	15999	1.32621	1	1	0.999547
KEGG_PATHWAY	ccad04612:Antigen processing and presentation	29	0.547997	0.0974016	LOC122424030, LOC122429686, CIITA, LOC122430139, LOC122429366, HSP90AB1, LOC122423465, LOC122429106, LOC122428193, LOC122444227, LOC122423927, LOC122443970, LOC122429902, PDIA3, LOC122429972, HSPA8, HSPA5, NFYB, HSPA4, NFYC, TAP2, RFXANK, LOC122429593, CD4, CD8A, LOC122430140, PSME2, LOC122443968, LGMN	2430	95	10427	1.30987	1	0.236451	0.173308
GOTERM_MF_DIRECT	GO:0005080~protein kinase C binding	6	0.113379	0.0976125	PARD6B, CAVIN2, RACK1, PKP2, SQSTM1, YWHAG	3930	11	16442	2.28203	1	1	0.997165
GOTERM_MF_DIRECT	GO:0051721~protein phosphatase 2A binding	6	0.113379	0.0976125	ANKLE2, LOC122443603, LOC122432124, STRN, STRN4, STRN3	3930	11	16442	2.28203	1	1	0.997165
KEGG_PATHWAY	ccad04720:Long-term potentiation	24	0.453515	0.0981257	CAMK2D, MAP2K1, PRKCB, ARAF, ITPR2, ITPR3, PPP1CA, GRIN2D, RAP1B, PPP1CC, PPP3CA, RPS6KA3, PPP3R1, PLCB3, PLCB4, RAP1A, CAMK4, MAPK1, KRAS, RAF1, PRKACB, RAPGEF3, ATF4, MAPK3	2430	76	10427	1.35504	1	0.236577	0.1734
GOTERM_MF_DIRECT	GO:0051082~unfolded protein binding	32	0.604686	0.0983196	LOC122430139, HSP90AB1, LOC122423465, LOC122428193, HSPA13, DNAJB2, NUDCD3, DNAJB4, GRPEL2, CDC37L1, CCT8, UGGT1, CCT4, HSPA9, CCT2, HSPA8, TRAP1, HSPA5, CCDC115, HSPE1, CLPX, PDRG1, CCT6A, ERN1, SHQ1, DNAJA3, TCP1, LOC122430140, PFDN1, PFDN2, PFDN5, PFDN6	3930	104	16442	1.2873	1	1	0.997165
GOTERM_BP_DIRECT	GO:0048280~vesicle fusion with Golgi apparatus	6	0.113379	0.0983309	YIPF4, YIPF5, VTI1A, SEC22B, BET1, VTI1B	3832	11	15999	2.27733	1	1	0.999547
GOTERM_BP_DIRECT	GO:0032007~negative regulation of TOR signaling	6	0.113379	0.0983309	GSK3A, LOC122429801, TMEM127, TNFAIP8L1, TSC2, TSC1	3832	11	15999	2.27733	1	1	0.999547
GOTERM_MF_DIRECT	GO:0019948~SUMO activating enzyme activity	5	0.0944822	0.099048	UBA7, UBA6, UBA2, UBA1, SAE1	3930	8	16442	2.61482	1	1	0.997165
GOTERM_MF_DIRECT	GO:0070034~telomerase RNA binding	5	0.0944822	0.099048	TERT, TEP1, SMG7, SMG5, SMG6	3930	8	16442	2.61482	1	1	0.997165
GOTERM_MF_DIRECT	GO:0005049~nuclear export signal receptor activity	5	0.0944822	0.099048	XPO1, XPO6, CSE1L, XPO5, XPO7	3930	8	16442	2.61482	1	1	0.997165
GOTERM_MF_DIRECT	GO:0035005~1-phosphatidylinositol-4-phosphate 3-kinase activity	5	0.0944822	0.099048	LOC122425452, PIK3CA, PIK3CD, PIK3C2A, PIK3CG	3930	8	16442	2.61482	1	1	0.997165
GOTERM_BP_DIRECT	GO:0016075~rRNA catabolic process	5	0.0944822	0.0996773	EXOSC5, XRN1, DIS3, SLFN14, DIS3L	3832	8	15999	2.60944	1	1	0.999547
GOTERM_BP_DIRECT	GO:0006783~heme biosynthetic process	5	0.0944822	0.0996773	ALAD, ALAS2, UROD, HMBS, PPOX	3832	8	15999	2.60944	1	1	0.999547
GOTERM_BP_DIRECT	GO:0002084~protein depalmitoylation	5	0.0944822	0.0996773	LYPLA2, LYPLA1, PPT1, ABHD17C, LYPLAL1	3832	8	15999	2.60944	1	1	0.999547
GOTERM_BP_DIRECT	GO:0071456~cellular response to hypoxia	5	0.0944822	0.0996773	EGLN3, EGLN2, EPAS1, HIF3A, HIF1A	3832	8	15999	2.60944	1	1	0.999547
GOTERM_BP_DIRECT	GO:0048814~regulation of dendrite morphogenesis	5	0.0944822	0.0996773	FXR1, HECW2, NEDD4, NEDD4L, LZTS1	3832	8	15999	2.60944	1	1	0.999547
GOTERM_BP_DIRECT	GO:0000086~G2/M transition of mitotic cell cycle	5	0.0944822	0.0996773	LOC122439416, FBXL3, FOXM1, CDC25C, CDC25A	3832	8	15999	2.60944	1	1	0.999547
