# Supplementary material for: Peripheral transcriptional responses to experimental SARS-CoV-2 inoculation in North American Elk cows and calves
Source: Research Square preprint supplement (doi:10.21203/rs.3.rs-6505643/v1), 2025-05-15
Supplement: Supplementary file 11 [file cab2751b8eec89a4814d7960.xlsx]

## Sheet: Suppl_table12_MF,BP, KEGG_UpDEG
Category	Term	Count	%	PValue	Genes	List Total	Pop Hits	Pop Total	Fold Enrichment	Bonferroni	Benjamini	FDR
KEGG_PATHWAY	ccad03440:Homologous recombination	18	0.413888	3.8403e-05	MUS81, BARD1, TOP3B, BLM, ABRAXAS1, XRCC2, XRCC3, TOP3A, BRCC3, RAD54B, SEM1, RAD52, RAD50, RAD51, RPA3, RBBP8, TOPBP1, LOC122423602	1524	42	10427	2.93223	0.0132377	0.0133642	0.0133258
KEGG_PATHWAY	ccad03460:Fanconi anemia pathway	19	0.436882	0.000326013	MUS81, TOP3B, BLM, RMI2, POLN, CENPX, FANCM, TOP3A, REV1, FAAP24, FANCC, FANCB, RAD51, RPA3, UBE2T, USP1, PMS2, FAN1, LOC122435272	1524	53	10427	2.45274	0.106979	0.0567263	0.0565633
KEGG_PATHWAY	ccad03010:Ribosome	98	2.25339	0.000755172	RPL5, RPL30, LOC122429761, LOC122424993, RPS15, RPL36AL, LOC122448722, RPL35, LOC122455254, LOC122424583, RPL21, LOC122426369, RPL22, LOC122431836, LOC122437256, LOC122432243, RPL27, RPL26, LOC122426404, LOC122439670, LOC122430898, LOC122423441, MRPL18, LOC122434456, LOC122420295, LOC122420690, MRPL12, LOC122435548, LOC122422190, MRPL10, MRPL20, LOC122433080, LOC122436231, LOC122420695, LOC122431…	1524	489	10427	1.37117	0.230599	0.0875999	0.0873482
GOTERM_CC_DIRECT	GO:0005874~microtubule	20	0.459876	0.0015465	TUBAL3, MAP1S, LOC122430099, LOC122426664, TUBD1, TUBB4A, DNM1, TPX2, CENPE, TPPP2, MAP1B, MAP1A, DCDC2B, LOC122441498, NUSAP1, CDK2AP2, RADIL, EFHC2, LOC122422249, TUBA8	2508	58	15361	2.112	0.584198	0.442438	0.442438
GOTERM_BP_DIRECT	GO:0051017~actin filament bundle assembly	10	0.229938	0.00155617	LIMA1, BAIAP2L2, BAIAP2L1, FSCN1, SHROOM1, ESPN, BAIAP2, AIF1, PLS1, LIMD2	2611	19	15999	3.22502	0.93882	1	1
GOTERM_CC_DIRECT	GO:0031594~neuromuscular junction	10	0.229938	0.00156063	FCHSD1, UNC13B, SYNGR1, UNC13A, PSEN2, PSEN1, SYNC, SYNGR4, LOC122454484, SNTA1	2508	19	15361	3.22358	0.58752	0.442438	0.442438
GOTERM_MF_DIRECT	GO:0008270~zinc ion binding	132	3.03518	0.00213215	ZNF330, PGLYRP3, PGLYRP2, ZFAND3, KDM1B, TTF2, ZFAND1, NR3C2, PEG10, DHX58, SCAPER, TRIM23, PIAS3, USP5, LOC122429635, NSMCE2, PIAS1, AR, NEIL3, TRIM17, ZNF318, TRIM13, PGR, TRIM16, NEIL1, SNRPC, SRSF7, CUL9, L3MBTL1, LOC122454388, ZCCHC9, DTX2, AEBP1, GATA1, ZMAT3, LOC122435542, ZRANB3, ZFHX3, DTNA, ZFHX2, DTNB, NFXL1, ESR1, ST18, ZZEF1, BMP1, ZZZ3, RPS29, LOC122421014, LOC122433471, ZCCHC12, SU…	2678	637	16442	1.27227	0.909394	1	1
GOTERM_BP_DIRECT	GO:0000278~mitotic cell cycle	21	0.48287	0.00333213	CDT1, WDHD1, TUBAL3, LOC122430099, LOC122426664, TUBD1, SNX33, SKA3, TUBB4A, PPP2CA, NEDD1, CENPE, PPP2CB, WEE1, WEE2, ZW10, LOC122441498, TUBGCP3, LOC122422249, POLE, TUBA8	2611	66	15999	1.94967	0.997491	1	1
GOTERM_MF_DIRECT	GO:0005515~protein binding	424	9.74937	0.00352258	MDC1, FRMPD4, WDR86, WDR83, SMC3, SLA2, LOC122438914, PREX2, PSMD9, UBASH3B, LIPG, SAMD12, LOC122422217, SAMD10, VPS39, ANKS1B, WDHD1, PRKCI, UNC5A, UNC5B, DNAAF1, ARMC7, WDR72, OPTC, HECW2, TYRO3, SPARCL1, NGEF, SKAP2, LOC122421381, PRKDC, WDR64, SLCO5A1, AAAS, PRKCZ, IL22RA2, C9, RAD21, FLRT1, PRDM16, RRS1, CEP72, LOC122421388, ZBTB7B, PLK4, BARD1, F8A1, STARD13, SETD1B, WDR53, NETO2, TPBGL, SN…	2678	2320	16442	1.12208	0.981125	1	1
KEGG_PATHWAY	ccad04071:Sphingolipid signaling pathway	31	0.712808	0.00444786	OPRD1, PTEN, PIK3R3, PIK3R2, PLD1, PRKCZ, TNF, PPP2CA, PPP2CB, PPP2R1B, PPP2R5E, SPTLC3, ADORA1, RAC3, S1PR3, S1PR2, S1PR5, BID, CERS4, PRKCE, SPHK1, SGPP1, MAPK12, MAPK11, PLCB3, PLCB4, PPP2R2C, PPP2R2B, DEGS2, PLCB1, CERS1	1524	127	10427	1.67006	0.787082	0.386964	0.385852
GOTERM_CC_DIRECT	GO:0030425~dendrite	20	0.459876	0.00535889	MAP1S, NPFF, HTR2B, SORBS2, TRAK1, PDYN, PPP1R9A, ZWINT, CALB2, SAMD14, HTR6, HRH1, SMO, MAP1B, PNOC, MAP1A, ADORA1, HOMER3, LOC122429901, CNIH2	2508	64	15361	1.914	0.952483	0.868713	0.868713
GOTERM_MF_DIRECT	GO:0003735~structural constituent of ribosome	106	2.43734	0.00672573	RPL5, RPL30, LOC122429761, LOC122424993, LOC122452307, RPS15, RPL36AL, LOC122448722, RPL35, LOC122455254, LOC122424583, RPL21, LOC122426369, RPL22, MRPS18B, LOC122431836, LOC122437256, LOC122432243, RPL27, RPL26, LOC122426404, LOC122439670, LOC122423441, MRPL18, LOC122434456, LOC122421144, LOC122420295, LOC122420690, MRPL12, LOC122435548, LOC122422190, MRPL10, MRPL20, LOC122433080, LOC122420695, …	2678	514	16442	1.26615	0.999496	1	1
GOTERM_BP_DIRECT	GO:0006302~double-strand break repair	10	0.229938	0.00742047	RNF168, RAD50, POLN, TDP2, RNF8, TNKS1BP1, ACTR8, BRCC3, MPND, GGN	2611	23	15999	2.66415	0.999998	1	1
KEGG_PATHWAY	ccad04261:Adrenergic signaling in cardiomyocytes	37	0.85077	0.0077446	CAMK2B, POPDC2, ADCY4, ATP1A3, CACNA1D, CALML4, ADCY6, PIK3R6, PIK3CG, SLC8A2, PPP2CA, CACNG6, PPP2CB, CACNG8, RPS6KA5, PPP2R1B, PPP2R5E, CREB3L4, PRKACB, TPM4, TPM2, CACNA2D3, ATP2B2, CACNA2D4, MAPK12, PPP1CA, SLC8A3, CREB3, MAPK11, PLCB3, PLCB4, PPP2R2C, PPP1R1A, PPP2R2B, KCNQ1, PLCB1, SCN4B	1524	165	10427	1.53424	0.932649	0.539024	0.537475
GOTERM_BP_DIRECT	GO:0006281~DNA repair	16	0.367901	0.00930223	ZRANB3, PIF1, WDHD1, RFC3, RMI2, UBE2B, CENPX, RFC2, DOT1L, DDB2, ALKBH3, DMC1, TIMELESS, RAD1, DMAP1, RAD9B	2611	49	15999	2.00083	1	1	1
GOTERM_BP_DIRECT	GO:0006886~intracellular protein transport	42	0.965739	0.00997497	NAPA, VPS29, RAMP3, STX17, STXBP3, SAR1B, LOC122422891, STXBP1, VPS26C, CLTB, VPS26A, SNX10, AP2A1, SNX33, TOMM22, AP3M2, ARFRP1, SNX1, RAB20, SNX2, AP1G2, ARFIP2, TMED1, TMED6, TMED5, SEC31B, LOC122454483, VPS39, TRIM23, LOC122433182, CD74, VPS18, SEC24A, STX8, SYTL5, AP3B2, STX1B, RABL3, PICK1, VIPAS39, VPS45, TSNARE1	2611	176	15999	1.46225	1	1	1
GOTERM_MF_DIRECT	GO:0004725~protein tyrosine phosphatase activity	17	0.390894	0.0101175	PTPRT, PTPRU, LOC122452399, PTPRN2, PTPRN, EYA4, PTEN, PTPN11, PTPRK, PTPRH, PTPN14, PTPRF, PTPRD, UBASH3B, PTPRA, ACP4, PTPN3	2678	54	16442	1.93285	0.999989	1	1
KEGG_PATHWAY	ccad01100:Metabolic pathways	290	6.6682	0.0112139	PGAP1, LOC122455135, LOC122451456, PANK1, TXNDC12, LOC122432817, ABAT, ENO2, ENO3, HYKK, TDO2, FLAD1, LIPG, LOC122434670, SEPHS2, XYLB, PDHX, ACOT8, ATP6V1G2, MECR, ENTPD3, ENTPD6, HSD11B1L, ALG3, ALG1, UPB1, GBGT1, GCAT, LOC122439435, MTHFD2L, LOC122454293, GPLD1, PDE1C, RPN2, PDE1B, SDSL, LIAS, HSD11B2, RDH12, LOC122419730, PPCS, NEU1, PRDM16, ST8SIA5, ST3GAL5, PIP5K1B, RIMKLA, ST3GAL3, B4GALNT…	1524	1764	10427	1.1248	0.980024	0.647991	0.646129
GOTERM_CC_DIRECT	GO:0032588~trans-Golgi network membrane	7	0.160957	0.0113968	TEPSIN, SCAMP5, SCAMP4, ARFIP2, PICK1, PLD4, CLBA1	2508	13	15361	3.29797	0.998495	0.868713	0.868713
GOTERM_CC_DIRECT	GO:0005762~mitochondrial large ribosomal subunit	13	0.298919	0.011837	NSUN4, MRPL38, MRPL27, MRPL36, MRPL58, MRPL12, MRPL10, MRPL54, MRPL55, MRPL52, MRPL51, MRPL40, LOC122432042	2508	37	15361	2.15196	0.998831	0.868713	0.868713
GOTERM_CC_DIRECT	GO:0005783~endoplasmic reticulum	68	1.56358	0.0118814	POMT2, TOR2A, PGAP1, PIGQ, ZFAND2B, MLC1, LOC122435920, TXNDC12, PLOD2, CWH43, PIGW, LOC122433949, ZDHHC1, PHTF1, TBC1D30, TMED1, TMED6, LOC122454484, TMED5, PDIA2, ELOVL5, ELOVL2, ALG3, ELOVL6, ELOVL7, P3H3, ALG1, TLCD3B, PDIA5, LOC122442434, RCN1, PNLDC1, LOC122421312, ERP27, KDELR3, SLC27A3, SLC27A2, SLC27A5, UBIAD1, EI24, SEZ6, PLD4, ZDHHC21, LOC122420096, ATP2C2, PSEN1, SEZ6L2, CST7, AGPAT2,…	2508	315	15361	1.32218	0.99886	0.868713	0.868713
GOTERM_CC_DIRECT	GO:0043025~neuronal cell body	15	0.344907	0.012464	NTRK2, NRSN2, MAP1S, PSEN2, SEZ6, CACNA1A, SORBS2, PSEN1, PDYN, SEZ6L2, PTK7, MAP1B, PNOC, MAP1A, LOC122454484	2508	46	15361	1.99722	0.999184	0.868713	0.868713
GOTERM_BP_DIRECT	GO:0006865~amino acid transport	11	0.252932	0.0132302	LOC122421240, LOC122420179, LOC122420186, LOC122421234, SLC3A1, LOC122420174, LOC122421235, LOC122420183, SLC7A1, SLC7A2, LOC122420191	2611	29	15999	2.32424	1	1	1
KEGG_PATHWAY	ccad04390:Hippo signaling pathway	37	0.85077	0.0135831	YWHAE, YAP1, PARD6G, PRKCZ, SAV1, STK3, PPP2CA, PPP2CB, PARD6A, CCND1, PPP2R1B, CDH1, RASSF6, DVL1, TP53BP2, AMH, LOC122420638, TEAD1, WNT3, YWHAG, YWHAH, TEAD3, WWTR1, WNT10B, SMAD1, TCF7L1, PRKCI, TGFB2, WNT5B, FZD4, WNT5A, TGFBR1, PPP1CA, MOB1B, PPP2R2C, PPP2R2B, LOC122453084	1524	171	10427	1.4804	0.991311	0.647991	0.646129
GOTERM_BP_DIRECT	GO:0007009~plasma membrane organization	6	0.137963	0.0140965	BAIAP2L2, BAIAP2L1, TLCD2, TLCD1, BAIAP2, MTSS2	2611	10	15999	3.67652	1	1	1
GOTERM_CC_DIRECT	GO:0016324~apical plasma membrane	17	0.390894	0.0148273	ABCC2, UPK2, SLC34A1, PSEN2, PARD6G, UMOD, PDZK1, SHROOM1, PSEN1, PARD3B, TMEM114, KIAA1614, HAX1, PARD6A, MARVELD2, PROM1, LOC122454484	2508	56	15361	1.85931	0.99979	0.868713	0.868713
KEGG_PATHWAY	ccad00563:Glycosylphosphatidylinositol (GPI)-anchor biosynthesis	10	0.229938	0.0148963	PIGS, DPM2, PIGU, PGAP1, GPAA1, PIGQ, PIGZ, PIGW, PIGF, GPLD1	1524	28	10427	2.44352	0.994527	0.647991	0.646129
GOTERM_CC_DIRECT	GO:0043198~dendritic shaft	4	0.0919752	0.015247	SEZ6, PSEN2, PSEN1, LOC122454484	2508	4	15361	6.1248	0.999835	0.868713	0.868713
GOTERM_CC_DIRECT	GO:0015629~actin cytoskeleton	21	0.48287	0.0153212	AVIL, SYNPO2, CAPG, PARVA, PPP1R9A, SRCIN1, MTSS2, LIMD2, VIL1, ARHGAP33, LIMA1, SAMD14, PEAK3, HAX1, SYNPO2L, CFL2, MYO6, FSCN1, KPTN, SYNPO, MYOZ2	2508	75	15361	1.71494	0.999842	0.868713	0.868713
GOTERM_MF_DIRECT	GO:0004843~cysteine-type deubiquitinase activity	25	0.574845	0.0183301	USP13, MINDY4, USP38, LOC122432015, USP33, OTUD7A, BRCC3, VCPIP1, ATXN3, USP1, USP50, USP30, USP24, ZRANB1, USP5, USP21, USP2, YOD1, JOSD2, UCHL3, JOSD1, USP28, LOC122437916, LOC122435272, OTUD3	2678	96	16442	1.59887	1	1	1
GOTERM_BP_DIRECT	GO:0007275~multicellular organism development	35	0.804783	0.019625	RET, NOTCH3, DHH, MST1R, EGFR, SPRED3, CDH5, SPRED1, CDH3, ERBB3, CDH1, KDR, CDH24, OTX1, AMELX, WNT3, JAG2, WNT10B, PDGFRA, NTRK2, WNT5B, EYA4, SPRY4, TNK1, WNT5A, VANGL1, DKK4, VANGL2, AXL, FAT1, TYRO3, SPRY1, CDHR5, CDH15, FGFR1	2611	147	15999	1.45894	1	1	1
GOTERM_BP_DIRECT	GO:0007399~nervous system development	17	0.390894	0.0206235	UNC119B, NRSN2, RBFOX2, CABLES1, MST1R, NRG2, LDB2, MUC3A, TGFBR1, TMEM223, NRN1L, ERBB3, AXL, DPF1, TYRO3, CSPG5, CDON	2611	58	15999	1.796	1	1	1
GOTERM_MF_DIRECT	GO:0005080~protein kinase C binding	6	0.137963	0.0222403	KIAA1614, PARD6A, CAVIN3, PICK1, PARD6G, YWHAG	2678	11	16442	3.3489	1	1	1
KEGG_PATHWAY	ccad04512:ECM-receptor interaction	22	0.505863	0.0226399	LOC122424462, TNXB, LOC122424593, ITGB4, GP1BB, LAMA4, ITGA2B, GP6, NPNT, THBS1, THBS4, THBS3, COL1A1, GP9, SV2C, FRAS1, COL1A2, TNN, COL6A2, ITGA10, COL6A1, SDC1	1524	92	10427	1.6361	0.999646	0.675802	0.67386
KEGG_PATHWAY	ccad01232:Nucleotide metabolism	21	0.48287	0.0239018	HDDC2, RRM1, DUT, RRM2, ENTPD3, ENTPD6, AK1, GMPR, NME4, AK6, TYMS, AK7, NT5C3A, UCK2, RRM2B, NT5DC4, GUK1, LOC122434352, DCTPP1, ADA, ITPA	1524	87	10427	1.65148	0.999774	0.675802	0.67386
GOTERM_CC_DIRECT	GO:0012505~endomembrane system	17	0.390894	0.0242165	LOC122447162, POGLUT1, STX17, STX8, NENF, AIG1, NRBP2, STX1B, PGRMC1, DNAJC1, RAB20, ABHD16A, CNPY4, RABL3, TMCC3, TSNARE1, CDK5RAP3	2508	59	15361	1.76477	0.999999	1	1
GOTERM_BP_DIRECT	GO:0006816~calcium ion transport	7	0.160957	0.0247803	CACNG6, CACNG8, RAMP3, PSEN2, PSEN1, SELENOK, LOC122454484	2611	15	15999	2.85952	1	1	1
GOTERM_BP_DIRECT	GO:0006904~vesicle docking involved in exocytosis	7	0.160957	0.0247803	RAB3B, RAB3C, VPS18, STXBP3, STXBP1, RAB13, RAB8B	2611	15	15999	2.85952	1	1	1
KEGG_PATHWAY	ccad00900:Terpenoid backbone biosynthesis	8	0.18395	0.025033	FDPS, MVK, LOC122426630, PMVK, MVD, PDSS1, ZMPSTE24, PCYOX1	1524	21	10427	2.60642	0.999849	0.675802	0.67386
GOTERM_BP_DIRECT	GO:0007224~smoothened signaling pathway	8	0.18395	0.0251199	STIL, SMO, DHH, TCTN2, PTCH2, GPC2, GLI1, GLIS2	2611	19	15999	2.58002	1	1	1
KEGG_PATHWAY	ccad05414:Dilated cardiomyopathy	24	0.551851	0.0251288	MYBPC3, TGFB2, DTNA, TPM4, ITGB4, TPM2, ITGA2B, ADCY4, CACNA2D3, CACNA1D, CACNA2D4, IGF1, TNF, ADCY6, SLC8A2, SLC8A3, CACNG6, CACNG8, DES, SGCA, ITGA10, PRKACB, SNTB2, SNTA1	1524	104	10427	1.57889	0.999854	0.675802	0.67386
GOTERM_CC_DIRECT	GO:0005840~ribosome	88	2.02345	0.0282956	RPL5, MRPS15, LOC122429761, RPLP1, MRPS11, LOC122424993, LOC122452307, MRPL36, LOC122446189, LOC122440480, LOC122427261, LOC122420877, RPS15, MRPL2, RPL36AL, LOC122448722, RPL35, LOC122426560, LOC122422360, LOC122454256, LOC122428342, LOC122432840, RPL21, LOC122451787, LOC122426369, LOC122423850, RPL22, MRPS18B, MRPS2, RPS3A, LOC122431836, MRPS7, LOC122440490, LOC122437256, LOC122432243, RPL27, R…	2508	440	15361	1.22496	1	1	1
GOTERM_BP_DIRECT	GO:0000492~box C/D snoRNP assembly	5	0.114969	0.0284653	NOPCHAP1, ZNHIT3, RUVBL2, PIH1D1, PIH1D2	2611	8	15999	3.82971	1	1	1
GOTERM_BP_DIRECT	GO:0070262~peptidyl-serine dephosphorylation	5	0.114969	0.0284653	PPP2CA, PPP2CB, PPP4C, PPP2R2C, PPP2R2B	2611	8	15999	3.82971	1	1	1
GOTERM_MF_DIRECT	GO:0030295~protein kinase activator activity	10	0.229938	0.0288989	MOB1B, GPRC5A, RGCC, LOC122420564, RPLP1, MOB2, LOC122420690, GPRC5D, LOC122422190, LOC122434817	2678	28	16442	2.19273	1	1	1
GOTERM_CC_DIRECT	GO:0005634~nucleus	480	11.037	0.0294519	MDC1, ZNF296, PWWP2B, GPATCH1, TESK2, LOC122438914, ALKBH3, ZC3H12C, PSMD9, PPP4R2, PSMD4, CREB3L4, LOC122420276, NKX1-2, LOC122434673, PRKACB, PRKAB2, ZNF19, RBFOX2, DDX11, STARD9, RFX2, REV1, ZNF12, AR, ISL2, ADPRS, SRFBP1, ATF5, PRR11, RHNO1, TSPYL5, ZNF398, LOC122434219, CDCA2, PRKDC, CDCA4, LOC122434215, SHOX2, XPC, OAZ2, OAZ3, PPP4C, NTHL1, PRDM16, RRS1, PPARGC1B, CDK18, ZNF140, ZNF32, LOC1…	2508	2723	15361	1.07966	1	1	1
GOTERM_MF_DIRECT	GO:0005200~structural constituent of cytoskeleton	12	0.275926	0.0295047	SPTBN4, SYNM, TUBAL3, LOC122430099, LOC122426664, LOC122441498, TUBD1, TLN2, LOC122422249, TUBB4A, SPTB, TUBA8	2678	37	16442	1.99124	1	1	1
KEGG_PATHWAY	ccad05016:Huntington disease	70	1.60957	0.0295814	LOC122430038, NDUFA13, LOC122451456, NDUFA10, CLTB, AP2A1, LOC122424390, DNALI1, LOC122432978, PSMD9, LOC122427709, ACTR1B, PSMD4, CREB3L4, LOC122434670, TGM2, LOC122433259, SDHB, CREB3, PLCB3, PLCB4, NDUFS7, PSMA2, PPIF, NDUFS3, NDUFS2, ULK2, PPARG, LOC122422249, PLCB1, SLC25A4, LOC122427289, NDUFB9, PSMD12, DNAH1, NDUFB7, DNAH7, TUBAL3, LOC122430099, SLC1A2, NDUFA4L2, NDUFB1, NRF1, PSMA7, ATP5M…	1524	380	10427	1.26034	0.99997	0.675802	0.67386
KEGG_PATHWAY	ccad00760:Nicotinate and nicotinamide metabolism	12	0.275926	0.0295906	NADK2, NMNAT1, NT5DC4, NMRK2, NAPRT, QPRT, LOC122426455, SIRT4, LOC122426516, SIRT1, NUDT12, SIRT3	1524	41	10427	2.0025	0.99997	0.675802	0.67386
KEGG_PATHWAY	ccad03020:RNA polymerase	11	0.252932	0.0295937	POLR1B, POLR2D, LOC122424589, POLR3F, POLR3G, POLR1E, POLR3H, POLR2G, POLR2H, LOC122454561, POLR2K	1524	36	10427	2.09057	0.99997	0.675802	0.67386
GOTERM_MF_DIRECT	GO:0005543~phospholipid binding	15	0.344907	0.0299581	UNC13B, PSD, SPTBN4, UNC13A, SYTL5, SPTB, MTSS2, APOM, PSD2, PSD3, NUP62, ARFIP2, PACSIN3, PICK1, PACSIN1	2678	51	16442	1.80578	1	1	1
KEGG_PATHWAY	ccad05168:Herpes simplex virus 1 infection	78	1.79352	0.0317562	ZNF331, ZNF133, LOC122420470, TNF, LOC122420159, LOC122420598, ZNF84, ZNF41, ZNF568, IKBKE, ZFP37, ZNF684, ZNF484, ZNF19, ZNF560, DAXX, ZNF282, ZFP69B, ZNF10, ZNF12, LOC122420580, TICAM1, LOC122420623, LOC122420621, LOC122420587, ZNF879, SRSF2, LTA, TLR9, ZNF316, ZNF436, SRSF6, SRSF7, ZNF554, ZNF674, ZNF597, IRF9, SRSF9, ZNF398, RNASEL, PIK3R3, ZNF2, PIK3R2, ZNF23, LOC122420050, ZNF25, LOC1224205…	1524	431	10427	1.2382	0.999986	0.675802	0.67386
GOTERM_CC_DIRECT	GO:0005829~cytosol	151	3.47206	0.0319951	PANK1, UBXN2A, UBE3D, IRS1, NUBP1, NUBP2, BAIAP2L2, TATDN1, BAIAP2L1, PSMD4, RAVER1, PPIP5K2, PEG10, LOC122448722, RAVER2, FPGS, NUDT17, LGALS9, XYLB, ANKS1B, NUDT12, MAP1S, AKR1E2, AFAP1, YOD1, RUNDC3A, LOC122420666, LOC122424906, MAP1B, MAP1A, HSBP1L1, LOC122454293, RIN1, PPEF2, OSBP2, TRAPPC3L, LOC122454302, PFKFB1, UBA5, AK1, ECSCR, WNK4, THADA, PRDX3, STRIP1, CTIF, STRIP2, NDOR1, BTBD2, DVL1…	2508	800	15361	1.15606	1	1	1
GOTERM_MF_DIRECT	GO:0003779~actin binding	25	0.574845	0.0326631	PLEKHH2, SYNPO2, WASL, UACA, EPS8, PDLIM3, PHACTR3, LOC122426218, EPS8L1, EPS8L2, SYNPO, PDLIM4, MYOZ2, WASF3, PHACTR4, ANKRD24, LIMCH1, MAP1S, PARVA, SSH1, MTSS2, SYNPO2L, MAP1B, MAP1A, PFN2	2678	101	16442	1.51972	1	1	1
GOTERM_MF_DIRECT	GO:0035091~phosphatidylinositol binding	19	0.436882	0.0329902	PITPNB, NOXO1, SNX13, SNX10, SNX32, SNX33, PIK3C2A, PLD1, PITPNC1, PARD3B, ARHGAP33, SNX1, SNX2, SH3PXD2A, RPS6KC1, SNX15, SNX7, SNX8, LOC122454483	2678	71	16442	1.64301	1	1	1
KEGG_PATHWAY	ccad04114:Oocyte meiosis	30	0.689814	0.0330133	CAMK2B, YWHAE, ANAPC15, ADCY4, CALML4, SMC3, ADCY6, PPP2CA, PPP2CB, PPP2R1B, PPP2R5E, PRKACB, YWHAG, YWHAH, IGF1, MAPK12, PPP1CA, SGO1, MAD2L2, MAPK11, AR, CPEB1, STAG3, CDK2, LOC122453084, SPDYA, PGR, CPEB2, LOC122420769, ANAPC2	1524	141	10427	1.45572	0.999991	0.675802	0.67386
GOTERM_MF_DIRECT	GO:0005525~GTP binding	72	1.65555	0.0330986	RAB3B, LOC122431844, RAB3C, DIRAS2, RND2, RND3, GMPPB, RNF112, RAB42, LOC122441498, LOC122420276, LOC122421245, RAC3, TRIM23, RAB8B, RAB2B, RRAS2, LOC122438868, RHOD, GNL1, DNM1, TUFM, RHOB, RAP2A, LOC122422926, RRAGC, RAB36, RAB34, RHOJ, RRAGD, RHOU, LOC122432560, LOC122422249, ARL9, GNAZ, LOC122434219, TUBAL3, RRAD, SAR1B, LOC122430099, TUBD1, SRL, RHOBTB1, ARFRP1, GIMD1, RAB40B, RASD1, RAB20, …	2678	354	16442	1.24874	1	1	1
GOTERM_BP_DIRECT	GO:0000076~DNA replication checkpoint signaling	4	0.0919752	0.0334612	CDT1, TIPIN, TIMELESS, RAD9B	2611	5	15999	4.90203	1	1	1
GOTERM_BP_DIRECT	GO:0016358~dendrite development	4	0.0919752	0.0334612	MAP1S, MAP1B, LST1, MAP1A	2611	5	15999	4.90203	1	1	1
GOTERM_BP_DIRECT	GO:0042148~DNA strand invasion	4	0.0919752	0.0334612	RAD51, XRCC2, DMC1, LOC122423602	2611	5	15999	4.90203	1	1	1
GOTERM_BP_DIRECT	GO:0035329~hippo signaling	7	0.160957	0.0343016	YAP1, MOB1B, WWTR1, TEAD1, LOC122420638, SAV1, TEAD3	2611	16	15999	2.6808	1	1	1
KEGG_PATHWAY	ccad00240:Pyrimidine metabolism	15	0.344907	0.0366015	HDDC2, RRM1, DUT, RRM2, ENTPD3, ENTPD6, NME4, TYMS, UPB1, NT5C3A, UCK2, RRM2B, NT5DC4, LOC122434352, DCTPP1	1524	58	10427	1.76945	0.999998	0.679624	0.677671
GOTERM_BP_DIRECT	GO:0006412~translation	77	1.77052	0.03663	RPL5, MRPS15, LOC122429761, MRPS11, LOC122452307, MRPL36, LOC122446189, LOC122427261, LOC122420877, RPS15, MRPL1, RPL36AL, LOC122448722, RPL35, METTL17, LOC122426560, LOC122428342, LOC122432840, RPL21, LOC122451787, LOC122426369, LOC122423850, MRPS2, RPS3A, LOC122431836, MRPS7, LOC122440490, MRPL51, LOC122437256, LOC122432243, LOC122434981, RPL27, LOC122426729, LOC122423441, LOC122421461, LOC1224…	2611	383	15999	1.23191	1	1	1
KEGG_PATHWAY	ccad05171:Coronavirus disease - COVID-19	101	2.32237	0.0371059	RPL5, RPL30, LOC122429761, LOC122424993, TNF, RPS15, RPL36AL, LOC122448722, C3AR1, RPL35, LOC122455254, LOC122424583, RPL21, LOC122426369, LOC122430223, RPL22, LOC122431836, LOC122437256, LOC122432243, RPL27, RPL26, LOC122426404, LOC122439670, LOC122430898, LOC122423441, LOC122434456, PIK3R3, LOC122420295, PIK3R2, LOC122420690, LOC122435548, LOC122422190, LOC122433080, C9, LOC122420695, LOC122431…	1524	579	10427	1.19349	0.999998	0.679624	0.677671
GOTERM_MF_DIRECT	GO:0022857~transmembrane transporter activity	19	0.436882	0.0375156	SLC23A3, SLC22A3, LOC122431415, SLC46A1, SLC13A4, SLC2A10, SLC43A3, SLC23A1, SLC2A12, SPNS2, SLC2A8, SLC22A23, SLC22A15, SV2C, MFSD3, SLC17A5, SLC25A45, SLC37A3, SLC49A3	2678	72	16442	1.62019	1	1	1
GOTERM_BP_DIRECT	GO:0001755~neural crest cell migration	9	0.206944	0.0398734	SEMA5B, SEMA6A, SEMA4C, SEMA3B, SEMA3G, RADIL, SEMA4G, SEMA3F, PHACTR4	2611	25	15999	2.20591	1	1	1
GOTERM_BP_DIRECT	GO:1905515~non-motile cilium assembly	9	0.206944	0.0398734	RPGRIP1, TTC8, TMEM17, ARL13A, IFT122, BBS7, CC2D2A, TMEM80, WDR35	2611	25	15999	2.20591	1	1	1
GOTERM_MF_DIRECT	GO:0051539~4 iron, 4 sulfur cluster binding	8	0.18395	0.0427722	NDUFS7, NTHL1, RSAD1, LIAS, NDUFV1, NUBP1, NUBP2, MUTYH	2678	21	16442	2.33892	1	1	1
GOTERM_MF_DIRECT	GO:0003684~damaged DNA binding	10	0.229938	0.0442734	NEIL3, XRCC6, RPA3, RBBP8, XPA, REV1, XPC, NEIL1, RAD23B, DDB2	2678	30	16442	2.04655	1	1	1
GOTERM_BP_DIRECT	GO:0032233~positive regulation of actin filament bundle assembly	5	0.114969	0.0447324	SYNPO2L, SYNPO2, LOC122426218, SYNPO, PFN2	2611	9	15999	3.40419	1	1	1
GOTERM_MF_DIRECT	GO:0140664~ATP-dependent DNA damage sensor activity	7	0.160957	0.0455105	RAD51, XRCC2, XRCC3, MSH5, DMC1, PMS2, LOC122423602	2678	17	16442	2.52809	1	1	1
GOTERM_MF_DIRECT	GO:1901981~phosphatidylinositol phosphate binding	7	0.160957	0.0455105	DENND1C, DENND1A, SNX21, SNX22, PLEKHN1, PHLDA2, PHLDA1	2678	17	16442	2.52809	1	1	1
GOTERM_MF_DIRECT	GO:0017080~sodium channel regulator activity	6	0.137963	0.0467615	FXYD1, FXYD7, FXYD6, PRSS8, SCN4B, SCN2B	2678	13	16442	2.83369	1	1	1
KEGG_PATHWAY	ccad05410:Hypertrophic cardiomyopathy	22	0.505863	0.0470853	MYBPC3, PRKAB2, TGFB2, DTNA, TPM4, ITGB4, TPM2, ITGA2B, CACNA2D3, CACNA1D, CACNA2D4, IGF1, TNF, SLC8A2, SLC8A3, CACNG6, CACNG8, DES, SGCA, ITGA10, SNTB2, SNTA1	1524	99	10427	1.52041	1	0.73522	0.733108
GOTERM_BP_DIRECT	GO:0006270~DNA replication initiation	6	0.137963	0.0471099	ORC4, POLA2, CDC45, ORC1, NOC3L, TOPBP1	2611	13	15999	2.82809	1	1	1
KEGG_PATHWAY	ccad04728:Dopaminergic synapse	29	0.66682	0.0489468	CAMK2B, TOMT, CACNA1A, CACNA1D, CALML4, ARRB2, SLC6A3, PPP2CA, PPP2CB, GNG3, GNGT2, PPP2R1B, PPP2R5E, CREB3L4, SLC18A1, PRKACB, DRD4, MAPK12, PPP1CA, CREB3, MAPK11, PLCB3, PLCB4, CALY, TH, PPP2R2C, PPP2R2B, GNB3, PLCB1	1524	140	10427	1.41724	1	0.73522	0.733108
KEGG_PATHWAY	ccad04961:Endocrine and other factor-regulated calcium reabsorption	14	0.321913	0.0500416	CLTB, ATP1A3, AP2A1, ATP2B2, ESR1, DNM1, ADCY6, SLC8A2, SLC8A3, PLCB3, PLCB4, TRPV5, PLCB1, PRKACB	1524	55	10427	1.74157	1	0.73522	0.733108
GOTERM_BP_DIRECT	GO:0000028~ribosomal small subunit assembly	12	0.275926	0.0509602	RRP7A, RPS15, LOC122429761, MRPS11, LOC122420695, LOC122429501, LOC122429607, RPS27L, ERAL1, LOC122431251, LOC122431836, MRPS7	2611	40	15999	1.83826	1	1	1
KEGG_PATHWAY	ccad04392:Hippo signaling pathway - multiple species	9	0.206944	0.0510528	YAP1, MOB1B, WWTR1, RASSF6, TEAD1, LOC122420638, SAV1, STK3, TEAD3	1524	29	10427	2.12334	1	0.73522	0.733108
GOTERM_BP_DIRECT	GO:0006470~protein dephosphorylation	28	0.643826	0.0516624	PTPRT, PTPRU, PPM1N, PTPRN, PTEN, PPM1J, PTPRK, PTPRH, PPM1E, PTPRF, PPP4R2, PPP2R1B, PPP2R5E, PTPMT1, DUSP4, LOC122452399, PTPRN2, DUSP28, PTPN11, DUSP8, PTPN14, SSH1, PDP1, PTPRD, LOC122439435, UBLCP1, PTPRA, PTPN3	2611	121	15999	1.41794	1	1	1
GOTERM_MF_DIRECT	GO:0000149~SNARE binding	13	0.298919	0.0521239	EXOC3L1, EXOC3L2, SEC24A, STX17, STX8, LOC122421264, SNAP91, LOC122419778, STX1B, SYT11, LOC122421653, TSNARE1, LOC122433182	2678	45	16442	1.77368	1	1	1
KEGG_PATHWAY	ccad04814:Motor proteins	40	0.919752	0.05371	DNAH1, DNAH7, TUBAL3, LOC122430099, TUBD1, MYL6B, KIF17, DNALI1, KLC3, ACTR1B, LOC122437006, MYO6, LOC122441498, MYO18B, MYL10, MYH14, KIF1C, KIF21A, DNAI1, LOC122425826, TPM4, LOC122434963, TPM2, MYH15, LOC122426664, STARD9, KIF7, TUBB4A, LOC122432901, LOC122445041, CENPE, KIFC2, MYO15B, KIFC1, KIF26A, DYNLRB2, KIFC3, DYNLRB1, LOC122422249, TUBA8	1524	207	10427	1.3221	1	0.73522	0.733108
GOTERM_BP_DIRECT	GO:0051225~spindle assembly	8	0.18395	0.0546962	KASH5, STARD9, HAUS4, MAPRE3, TUBGCP3, HAUS5, SAC3D1, HAUS1	2611	22	15999	2.2282	1	1	1
GOTERM_BP_DIRECT	GO:0000724~double-strand break repair via homologous recombination	15	0.344907	0.0547539	BLM, XRCC2, NSMCE2, SMC5, RAD54B, SEM1, RAD52, RAD51, PPP4C, SFR1, RPA3, SWI5, NABP2, RBBP8, LOC122423602	2611	55	15999	1.67115	1	1	1
KEGG_PATHWAY	ccad04611:Platelet activation	27	0.620832	0.0561614	ITGA2B, ADCY4, PIK3R3, PIK3R2, PRKCZ, ADCY6, PIK3R6, MYLK3, PIK3CG, PRKACB, PRKG1, LOC122425826, PRKCI, GP1BB, LOC122430223, F2, GP6, MAPK12, PPP1CA, COL1A1, MAPK11, GP9, PLCB3, COL1A2, PLCB4, TLN2, PLCB1	1524	130	10427	1.421	1	0.73522	0.733108
KEGG_PATHWAY	ccad05415:Diabetic cardiomyopathy	50	1.14969	0.056675	LOC122430038, NDUFA13, LOC122451456, IRS1, NDUFA10, PTEN, LOC122424390, LOC122432978, LOC122427709, PDK4, LOC122434670, PDK2, LOC122433259, MMP2, SDHB, CPT1B, TGFBR1, PLCB3, PLCB4, NDUFS7, PPIF, NDUFS3, NDUFS2, PLCB1, PPARA, SLC25A4, CAMK2B, LOC122427289, NDUFB9, NDUFB7, NDUFA4L2, NDUFB1, PIK3R3, PIK3R2, PRKCZ, ATP5MC1, LOC122428616, NDUFV1, LOC122424880, TGFB2, NDUFA6, GFPT2, ATP5F1D, MAPK12, PP…	1524	269	10427	1.27172	1	0.73522	0.733108
GOTERM_MF_DIRECT	GO:0030943~mitochondrion targeting sequence binding	4	0.0919752	0.058597	TOMM20L, LOC122454429, TIMM22, TOMM20	2678	6	16442	4.0931	1	1	1
GOTERM_MF_DIRECT	GO:0008171~O-methyltransferase activity	4	0.0919752	0.058597	COMTD1, ASMT, BCDIN3D, LOC122434352	2678	6	16442	4.0931	1	1	1
GOTERM_CC_DIRECT	GO:0005768~endosome	22	0.505863	0.0586403	WASHC4, RAB3B, RAB3C, VPS29, VPS18, LOC122429876, VPS26C, VPS26A, SNX32, SNX1, RAB40B, RABEP1, SNX2, CALY, NSG2, RAB26, RAB13, PACSIN3, RAB11FIP2, LOC122454483, RAB8B, PACSIN1	2508	91	15361	1.48072	1	1	1
KEGG_PATHWAY	ccad04931:Insulin resistance	24	0.551851	0.0587433	PRKAB2, IRS1, PRKCE, GFPT2, PTEN, PIK3R3, PTPN11, PIK3R2, PYGM, PRKCZ, CPT1B, TNF, PTPRF, PPP1CA, CREB3, G6PC3, CREB3L4, PPP1R3E, SLC27A3, PPARA, LOC122421612, SLC27A2, PPARGC1B, SLC27A5	1524	113	10427	1.45314	1	0.73522	0.733108
GOTERM_CC_DIRECT	GO:0000794~condensed nuclear chromosome	4	0.0919752	0.0589598	RAD50, RAD51, IHO1, DMC1	2508	6	15361	4.0832	1	1	1
GOTERM_MF_DIRECT	GO:0003824~catalytic activity	7	0.160957	0.0591594	LOC122421111, ABHD8, AZIN2, PLD4, D2HGDH, PLD3, SUGCT	2678	18	16442	2.38764	1	1	1
GOTERM_BP_DIRECT	GO:0098703~calcium ion import across plasma membrane	7	0.160957	0.0596416	SLC8A3, TRPV5, CACNA1A, CACNA1D, TRPV1, NALF1, SLC8A2	2611	18	15999	2.38293	1	1	1
KEGG_PATHWAY	ccad04072:Phospholipase D signaling pathway	31	0.712808	0.0618625	SHC4, CXCL8, ADCY4, LPAR2, PDGFA, PIK3R3, PIK3R2, PLD1, AGPAT2, ADCY6, PIK3R6, PIK3CG, EGFR, CYTH3, GRM2, RRAS, PIP5K1B, PDGFRA, SPHK1, AVPR2, RRAS2, PTPN11, F2, DGKZ, DNM1, PLCB3, KITLG, PLCB4, LPAR5, RHEB, PLCB1	1524	155	10427	1.36837	1	0.73522	0.733108
GOTERM_BP_DIRECT	GO:0000027~ribosomal large subunit assembly	17	0.390894	0.0622472	RPL5, LOC122428342, LOC122423441, LOC122421461, LOC122434456, LOC122421144, LOC122426103, LOC122452307, RPL3L, LOC122432758, LOC122420081, LOC122450939, MRPL20, LOC122420685, LOC122451081, LOC122421458, LOC122430093	2611	66	15999	1.57831	1	1	1
GOTERM_BP_DIRECT	GO:0007264~small GTPase-mediated signal transduction	16	0.367901	0.0625029	DOCK3, GDI1, SH2D3A, KNDC1, RND2, RND3, RHOD, RHOBTB1, RHOB, ARHGAP33, RHEB, RHOJ, RAPGEF2, RAC3, RHOU, RHEBL1	2611	61	15999	1.60722	1	1	1
KEGG_PATHWAY	ccad05205:Proteoglycans in cancer	43	0.988733	0.0632623	CAMK2B, LOC122454541, SDC2, PIK3R3, TWIST1, PIK3R2, THBS1, TNF, EGFR, CCND1, RRAS, ERBB3, PLAU, KDR, LOC122421346, PRKACB, WNT3, LOC122432093, WNT10B, TGFB2, WNT5B, FZD4, LOC122433037, MMP2, WNT5A, RRAS2, PTPN11, ANK2, IGF1, NUDT16L1, ESR1, MAPK12, PPP1CA, VAV2, COL1A1, MAPK11, COL1A2, CTTN, SMO, SDC1, PPP1R12B, PPP1R12C, FGFR1	1524	228	10427	1.29035	1	0.73522	0.733108
KEGG_PATHWAY	ccad04015:Rap1 signaling pathway	42	0.965739	0.0636954	ITGA2B, ADCY4, LPAR2, PDGFA, PIK3R3, PARD6G, PIK3R2, CALML4, SIPA1L2, PRKCZ, THBS1, ADCY6, EGFR, RASGRP3, PARD6A, RRAS, CDH1, LOC122426218, KDR, RAC3, MAP2K6, FARP2, ANGPT4, PDGFRA, PRKCI, ANGPT2, IGF1, MAPK12, VAV2, AFDN, MAPK11, PLCB3, KITLG, PLCB4, LPAR5, FGF19, RAPGEF2, TLN2, PLCB1, RAPGEF5, PFN2, FGFR1	1524	222	10427	1.29441	1	0.73522	0.733108
GOTERM_BP_DIRECT	GO:0051091~positive regulation of DNA-binding transcription factor activity	6	0.137963	0.063728	TRIM52, LOC122429635, LOC122429690, LOC122429945, TRIM31, PPARGC1B	2611	14	15999	2.62609	1	1	1
GOTERM_CC_DIRECT	GO:0005742~mitochondrial outer membrane translocase complex	6	0.137963	0.0638249	TOMM20L, LOC122454429, TOMM20, TOMM40L, TOMM5, TOMM6	2508	14	15361	2.62491	1	1	1
GOTERM_MF_DIRECT	GO:0015175~neutral L-amino acid transmembrane transporter activity	5	0.114969	0.0647572	SLC7A5, SLC7A8, SLC43A1, SLC1A2, SLC7A10	2678	10	16442	3.06983	1	1	1
GOTERM_MF_DIRECT	GO:0030332~cyclin binding	5	0.114969	0.0647572	UBE3D, CDK3, CDK2, INCA1, KLHDC9	2678	10	16442	3.06983	1	1	1
GOTERM_BP_DIRECT	GO:2000649~regulation of sodium ion transmembrane transporter activity	5	0.114969	0.0651562	FXYD1, FXYD7, FXYD6, SCN4B, SCN2B	2611	10	15999	3.06377	1	1	1
GOTERM_BP_DIRECT	GO:0007269~neurotransmitter secretion	5	0.114969	0.0651562	STXBP3, STXBP1, SYN3, LIN7B, SYN1	2611	10	15999	3.06377	1	1	1
GOTERM_MF_DIRECT	GO:0031593~polyubiquitin modification-dependent protein binding	8	0.18395	0.0673643	PSMD4, ABRAXAS1, UFD1, ISG15, BRCC3, RAD23B, MPND, UBQLN3	2678	23	16442	2.13553	1	1	1
GOTERM_MF_DIRECT	GO:0051537~2 iron, 2 sulfur cluster binding	8	0.18395	0.0673643	LOC122427289, AIFM3, RFESD, LOC122426455, FDX2, CISD2, LOC122426516, SDHB	2678	23	16442	2.13553	1	1	1
KEGG_PATHWAY	ccad04520:Adherens junction	22	0.505863	0.0675611	FARP2, TCF7L1, WASL, BAIAP2, PTPRF, TGFBR1, RASIP1, EGFR, CDH5, AFDN, LOC122439435, CDH1, LOC122437006, SNAI1, MYL10, RAC3, RADIL, NECTIN3, WASF3, FGFR1, LOC122425826, NECTIN1	1524	103	10427	1.46137	1	0.73522	0.733108
KEGG_PATHWAY	ccad05217:Basal cell carcinoma	15	0.344907	0.0676065	WNT10B, TCF7L1, WNT5B, GADD45B, FZD4, WNT5A, PTCH2, KIF7, GLI1, DDB2, GADD45G, SMO, SUFU, DVL1, WNT3	1524	63	10427	1.62902	1	0.73522	0.733108
GOTERM_CC_DIRECT	GO:0042383~sarcolemma	8	0.18395	0.0680841	SLC8A3, POPDC2, SYNM, DES, PGM5, SYNC, SNTA1, SLC8A2	2508	23	15361	2.13037	1	1	1
GOTERM_BP_DIRECT	GO:0016579~protein deubiquitination	19	0.436882	0.0680852	USP13, USP24, USP38, LOC122432015, USP5, USP21, USP33, USP2, YOD1, JOSD2, UCHL3, JOSD1, USP28, LOC122437916, ATXN3, USP1, USP30, LOC122435272, OTUD3	2611	77	15999	1.51199	1	1	1
GOTERM_CC_DIRECT	GO:0030018~Z disc	12	0.275926	0.0696872	PDLIM3, DES, SYNPO2L, SYNPO2, PSEN2, PSEN1, SYNC, SYNPO, PPP1R12B, PDLIM4, LOC122454484, MYOZ2	2508	42	15361	1.74994	1	1	1
GOTERM_MF_DIRECT	GO:0004748~ribonucleoside-diphosphate reductase activity, thioredoxin disulfide as acceptor	3	0.0689814	0.0708772	RRM1, RRM2, RRM2B	2678	3	16442	6.13966	1	1	1
GOTERM_MF_DIRECT	GO:0035529~NADH pyrophosphatase activity	3	0.0689814	0.0708772	NUDT17, NUDT6, NUDT12	2678	3	16442	6.13966	1	1	1
GOTERM_BP_DIRECT	GO:0034498~early endosome to Golgi transport	3	0.0689814	0.071139	SNX1, SNX2, TRAPPC10	2611	3	15999	6.12754	1	1	1
GOTERM_BP_DIRECT	GO:0031114~regulation of microtubule depolymerization	3	0.0689814	0.071139	MAP1S, MAP1B, MAP1A	2611	3	15999	6.12754	1	1	1
GOTERM_BP_DIRECT	GO:0000730~DNA recombinase assembly	3	0.0689814	0.071139	RAD52, RAD51, DMC1	2611	3	15999	6.12754	1	1	1
GOTERM_BP_DIRECT	GO:0009263~deoxyribonucleotide biosynthetic process	3	0.0689814	0.071139	RRM1, RRM2, RRM2B	2611	3	15999	6.12754	1	1	1
GOTERM_BP_DIRECT	GO:0042987~amyloid precursor protein catabolic process	3	0.0689814	0.071139	PSEN2, PSEN1, LOC122454484	2611	3	15999	6.12754	1	1	1
GOTERM_BP_DIRECT	GO:0070192~chromosome organization involved in meiotic cell cycle	3	0.0689814	0.071139	RAD50, RAD51, DMC1	2611	3	15999	6.12754	1	1	1
GOTERM_CC_DIRECT	GO:0035253~ciliary rootlet	3	0.0689814	0.0711959	PSEN2, PSEN1, LOC122454484	2508	3	15361	6.1248	1	1	1
GOTERM_MF_DIRECT	GO:0003924~GTPase activity	62	1.42562	0.0725604	RAB3B, LOC122431844, RAB3C, DIRAS2, RND2, RND3, RNF112, RAB42, LOC122420276, LOC122421245, RAC3, TRIM23, RAB8B, RAB2B, RRAS2, RHOD, GNL1, DNM1, TUFM, RHOB, RAP2A, LOC122422926, RRAGC, RAB36, RAB34, RHOJ, RRAGD, RABL3, RHOU, ARL9, GNAZ, LOC122434219, RRAD, SAR1B, LOC122430099, RHOBTB1, NUGGC, ARFRP1, RAB40B, RASD1, RAB20, RRAS, ARL13A, RAB26, RAB6A, RAB6B, LOC122432303, RASL10A, IRGC, RAB39A, RAB3…	2678	313	16442	1.21616	1	1	1
GOTERM_CC_DIRECT	GO:0005938~cell cortex	9	0.206944	0.0735776	ARHGAP33, KIAA1614, PARD6A, PSEN2, RAC3, PARD6G, PSEN1, LOC122454484, PARD3B	2508	28	15361	1.96869	1	1	1
KEGG_PATHWAY	ccad04820:Cytoskeleton in muscle cells	44	1.01173	0.0741404	SPTBN4, SPTBN5, ITGB4, SYNPO2, SDC2, COL11A2, ITGA2B, ATP1A3, FBLN1, NID1, ENO2, ENO3, THBS1, THBS4, MYOM3, THBS3, PDLIM3, SGCA, LOC122437006, MYH14, PDLIM4, MYOZ2, SNTA1, TMOD1, MYBPC3, DTNA, TPM4, CKM, TMOD4, TPM2, MYH15, ANKRD23, ANK2, LOC122445041, COL1A1, DES, COL1A2, OBSCN, COL6A2, ITGA10, COL6A1, SDC1, TLN2, SNTB2	1524	237	10427	1.27022	1	0.767457	0.765252
GOTERM_MF_DIRECT	GO:0030971~receptor tyrosine kinase binding	7	0.160957	0.0749844	SHC4, ANGPT4, ANGPT2, PSPN, ARTN, MST1, ACP4	2678	19	16442	2.26198	1	1	1
GOTERM_BP_DIRECT	GO:0006284~base-excision repair	7	0.160957	0.0755747	NEIL3, NTHL1, RPA3, XPA, APEX2, NEIL1, MUTYH	2611	19	15999	2.25751	1	1	1
GOTERM_MF_DIRECT	GO:0015171~amino acid transmembrane transporter activity	10	0.229938	0.0761822	LOC122421240, LOC122420179, LOC122420186, LOC122421234, LOC122420174, LOC122421235, LOC122420183, SLC7A1, SLC7A2, LOC122420191	2678	33	16442	1.8605	1	1	1
GOTERM_MF_DIRECT	GO:0004722~protein serine/threonine phosphatase activity	10	0.229938	0.0761822	PPP2CA, PDP1, PPP2CB, PPP4C, UBLCP1, PPM1N, PPM1J, PPM1E, PPEF2, PPP1CA	2678	33	16442	1.8605	1	1	1
KEGG_PATHWAY	ccad04721:Synaptic vesicle cycle	19	0.436882	0.0765202	UNC13B, NSF, NAPA, SNAP25, UNC13A, ATP6V1G2, STXBP1, CLTB, SLC1A2, SLC6A12, CACNA1A, AP2A1, DNM1, SLC6A3, CPLX3, STX1B, SLC6A7, SLC17A7, SLC18A1	1524	87	10427	1.4942	1	0.767457	0.765252
KEGG_PATHWAY	ccad04144:Endocytosis	49	1.1267	0.078155	WASHC4, LOC122431844, VPS29, LOC122425045, ZFYVE9, CLTB, AP2A1, WASL, ARRB2, ZFYVE27, PSD2, PSD3, VPS36, LOC122454483, PSD, PDGFRA, PRKCI, VPS37C, VPS37D, ARFGAP1, TGFBR1, DNM1, RNF41, ACAP3, ACAP1, RABEP1, RUFY2, LOC122430140, CHMP4A, CHMP6, PARD6G, VPS26A, SNX32, PLD1, PRKCZ, EGFR, LOC122422192, CYTH3, SNX1, SNX2, PARD6A, MVB12A, PIP5K1B, RAB11FIP2, RAB11FIP5, LOC122450155, SPART, DAB2, VPS45	1524	269	10427	1.24629	1	0.767457	0.765252
GOTERM_CC_DIRECT	GO:0030672~synaptic vesicle membrane	11	0.252932	0.079265	UNC13B, SYNGR1, UNC13A, SYPL1, CLTB, SLC17A7, SYPL2, SYN3, SYNGR4, SLC18A1, SYN1	2508	38	15361	1.77297	1	1	1
KEGG_PATHWAY	ccad04510:Focal adhesion	39	0.896758	0.0818766	SHC4, LOC122424593, TNXB, ITGB4, LAMA4, ITGA2B, PTEN, PDGFA, PIK3R3, PIK3R2, THBS1, THBS4, MYLK3, EGFR, THBS3, CCND1, TNN, LOC122437006, KDR, MYL10, RAC3, PIP5K1B, PAK5, LOC122425826, PDGFRA, LOC122424462, PARVA, EMP2, IGF1, PPP1CA, VAV2, COL1A1, COL1A2, COL6A2, ITGA10, COL6A1, TLN2, PPP1R12B, PPP1R12C	1524	208	10427	1.28285	1	0.767457	0.765252
KEGG_PATHWAY	ccad05030:Cocaine addiction	12	0.275926	0.0819337	GPSM1, GRM2, CREB3, GRIN3A, TH, CREB3L4, FOSB, PDYN, GRIN2C, SLC18A1, PRKACB, SLC6A3	1524	48	10427	1.71047	1	0.767457	0.765252
GOTERM_BP_DIRECT	GO:0006298~mismatch repair	6	0.137963	0.0832018	RNASEH2A, RPA3, MSH5, PMS2, XPC, MUTYH	2611	15	15999	2.45101	1	1	1
KEGG_PATHWAY	ccad04330:Notch signaling pathway	15	0.344907	0.0838028	JAG2, TLE4, PTCRA, NOTCH3, TLE2, NUMBL, PSEN2, DTX2, DTX3, PSEN1, TLE6, LFNG, DVL1, NUMB, LOC122454484	1524	65	10427	1.57889	1	0.767457	0.765252
KEGG_PATHWAY	ccad01240:Biosynthesis of cofactors	31	0.712808	0.0864429	PANK1, HAAO, AK1, QPRT, PPOX, LIAS, AK6, AK7, PTS, PPCDC, GMPPB, NADK2, NFS1, RDH12, TDO2, SPR, PPCS, FLAD1, RFK, NAPRT, GMPPA, FPGS, MMAB, UROS, AKR1A1, NME4, COQ7, COASY, DHRS3, NMNAT1, MTHFD2L	1524	160	10427	1.32561	1	0.771336	0.76912
GOTERM_BP_DIRECT	GO:0030150~protein import into mitochondrial matrix	9	0.206944	0.0875271	PAM16, LOC122454173, DNLZ, TOMM20L, TIMM17A, LOC122454429, TIMM21, TOMM20, TOMM40L	2611	29	15999	1.90165	1	1	1
GOTERM_CC_DIRECT	GO:0062023~collagen-containing extracellular matrix	15	0.344907	0.0901043	ANGPT4, ADAMDEC1, FCN3, ANGPT2, PRG4, F2, LGALS4, LGALS1, GPC2, SPARCL1, ANGPTL4, ADAMTS8, AMELX, ZP2, ANGPTL1	2508	59	15361	1.55715	1	1	1
GOTERM_BP_DIRECT	GO:0007010~cytoskeleton organization	10	0.229938	0.0901734	VIL1, STRIP1, STRIP2, ZRANB1, GAN, AVIL, PACSIN3, CFAP410, PAK5, PACSIN1	2611	34	15999	1.80222	1	1	1
GOTERM_MF_DIRECT	GO:0017075~syntaxin-1 binding	4	0.0919752	0.0903904	UNC13B, SNAP25, UNC13A, VAMP3	2678	7	16442	3.50838	1	1	1
GOTERM_MF_DIRECT	GO:0004439~phosphatidylinositol-4,5-bisphosphate 5-phosphatase activity	4	0.0919752	0.0903904	SYNJ1, PTPMT1, OCRL, SYNJ2	2678	7	16442	3.50838	1	1	1
GOTERM_MF_DIRECT	GO:0000400~four-way junction DNA binding	4	0.0919752	0.0903904	FANCM, XRCC2, XRCC3, LOC122423602	2678	7	16442	3.50838	1	1	1
GOTERM_MF_DIRECT	GO:0009922~fatty acid elongase activity	4	0.0919752	0.0903904	ELOVL5, ELOVL2, ELOVL6, ELOVL7	2678	7	16442	3.50838	1	1	1
GOTERM_BP_DIRECT	GO:0034626~fatty acid elongation, polyunsaturated fatty acid	4	0.0919752	0.0908279	ELOVL5, ELOVL2, ELOVL6, ELOVL7	2611	7	15999	3.50145	1	1	1
GOTERM_BP_DIRECT	GO:0034625~fatty acid elongation, monounsaturated fatty acid	4	0.0919752	0.0908279	ELOVL5, ELOVL2, ELOVL6, ELOVL7	2611	7	15999	3.50145	1	1	1
GOTERM_BP_DIRECT	GO:0019367~fatty acid elongation, saturated fatty acid	4	0.0919752	0.0908279	ELOVL5, ELOVL2, ELOVL6, ELOVL7	2611	7	15999	3.50145	1	1	1
GOTERM_BP_DIRECT	GO:1990542~mitochondrial transmembrane transport	4	0.0919752	0.0908279	UCP3, SLC25A40, SFXN4, SFXN5	2611	7	15999	3.50145	1	1	1
GOTERM_BP_DIRECT	GO:0000447~endonucleolytic cleavage in ITS1 to separate SSU-rRNA from 5.8S rRNA and LSU-rRNA from tricistronic rRNA transcript (SSU-rRNA, 5.8S rRNA, LSU-rRNA)	4	0.0919752	0.0908279	RPP40, RRS1, KRI1, NOP9	2611	7	15999	3.50145	1	1	1
GOTERM_CC_DIRECT	GO:0030991~intraciliary transport particle A	4	0.0919752	0.0909224	IFT140, IFT122, TTC21A, WDR35	2508	7	15361	3.49989	1	1	1
GOTERM_BP_DIRECT	GO:0033674~positive regulation of kinase activity	12	0.275926	0.0919247	RET, CD74, PDGFRA, NTRK2, ERBB3, AXL, TNK1, KDR, TYRO3, MST1R, EGFR, FGFR1	2611	44	15999	1.67115	1	1	1
GOTERM_MF_DIRECT	GO:0030215~semaphorin receptor binding	7	0.160957	0.0929682	SEMA5B, SEMA6A, SEMA4C, SEMA3B, SEMA3G, SEMA4G, SEMA3F	2678	20	16442	2.14888	1	1	1
GOTERM_BP_DIRECT	GO:0016192~vesicle-mediated transport	22	0.505863	0.0932739	VPS9D1, SFT2D3, YIPF1, GDI1, STXBP3, YIPF2, STXBP1, CACFD1, HPS1, HPS4, CCZ1, AP3B2, ZFYVE27, VPS41, VPS45, TSNARE1, VAMP4, CNIH2, RIN1, VPS39, TRIM23, VAMP3	2611	96	15999	1.40423	1	1	1
GOTERM_BP_DIRECT	GO:0071526~semaphorin-plexin signaling pathway	7	0.160957	0.0936745	SEMA5B, SEMA6A, SEMA4C, SEMA3B, SEMA3G, SEMA4G, SEMA3F	2611	20	15999	2.14464	1	1	1
GOTERM_BP_DIRECT	GO:0048843~negative regulation of axon extension involved in axon guidance	7	0.160957	0.0936745	SEMA5B, SEMA6A, SEMA4C, SEMA3B, SEMA3G, SEMA4G, SEMA3F	2611	20	15999	2.14464	1	1	1
GOTERM_MF_DIRECT	GO:0043565~sequence-specific DNA binding	21	0.48287	0.0944524	TSNAX, JMJD4, CBFB, MYRF, ETV2, LOC122434938, ESR1, THAP1, NR3C2, PGBD2, AR, ERFL, ELF3, SNAPC1, SAFB2, ZNF438, DNLZ, ZNF316, PGR, LOC122421723, SPDEF	2678	91	16442	1.41684	1	1	1
KEGG_PATHWAY	ccad04310:Wnt signaling pathway	35	0.804783	0.0948963	CAMK2B, LRP5, PRICKLE3, PSEN1, APCDD1, CCND1, DVL1, RAC3, SOST, LOC122454484, PRKACB, WNT3, TLE4, WNT10B, RNF43, TCF7L1, TLE2, WNT5B, FZD4, WNT5A, MCC, SIRT1, TLE6, VANGL1, DKK4, FOSL1, SFRP4, PLCB3, SFRP2, VANGL2, PLCB4, SFRP5, PLCB1, LGR6, LOC122420769	1524	186	10427	1.28745	1	0.825598	0.823226
GOTERM_BP_DIRECT	GO:0035556~intracellular signal transduction	49	1.1267	0.0967232	MAST3, MAST2, TSSK1B, PLEK, MYLK3, PREX2, NRBP2, RPS6KA5, BLNK, LOC122454484, RGS7, PRKCE, NRG2, DGKZ, VAV2, TSSK3, CILK1, SHC4, BRSK2, CCDC68, PKN3, TUFT1, ADCY4, PSEN2, WNK4, ASB14, RASAL1, PSEN1, PLD1, ADCY6, STK3, RAB40B, DCDC2B, DVL1, PLEK2, MARK4, SH2B3, PAK5, SOCS4, LOC122453744, DCLK3, MOK, MAPK11, SPSB2, NEURL2, PPP1R1A, ASB7, RGS11, ASB2	2611	245	15999	1.22551	1	1	1
GOTERM_MF_DIRECT	GO:0000977~RNA polymerase II transcription regulatory region sequence-specific DNA binding	28	0.643826	0.0968039	SCX, TWIST1, TCF21, AEBP1, HIF3A, NPAS1, BARX2, GLI4, LOC122420497, PRDM16, ZNF41, STOX1, PURG, TFAP2A, TFAP2C, TCF15, TFAP2E, LOC122427136, OSR1, NFXL1, PHOX2A, ZNF33B, NFX1, ZNF639, ATF5, SIM2, LOC122420604, ZNF574	2678	129	16442	1.33264	1	1	1
GOTERM_MF_DIRECT	GO:0001228~DNA-binding transcription activator activity, RNA polymerase II-specific	16	0.367901	0.097276	ZNF133, ZNF19, ZNF140, ZFP3, LOC122420580, ZNF12, LOC122420470, MEIS3, ZNF48, LOC122420621, LOC122420598, DDIT3, ATF5, STOX1, SOX4, ZNF750	2678	65	16442	1.5113	1	1	1
KEGG_PATHWAY	ccad05020:Prion disease	60	1.37963	0.0976151	LOC122430038, NDUFA13, LOC122451456, NDUFA10, LOC122424390, TNF, LOC122432978, PSMD9, LOC122427709, PSMD4, CREB3L4, LOC122434670, PRKACB, LOC122433259, SDHB, CREB3, NDUFS7, PSMA2, DDIT3, PPIF, LOC122430140, NDUFS3, NDUFS2, LOC122422249, SLC25A4, LOC122427289, C1QA, NDUFB9, PSMD12, NDUFB7, TUBAL3, LOC122430099, NDUFA4L2, NDUFB1, PIK3R3, CACNA1D, PIK3R2, PSMA7, ATP5MC1, KLC3, PSMB5, C9, NDUFV1, LOC…	1524	343	10427	1.19683	1	0.828538	0.826157
GOTERM_BP_DIRECT	GO:0018105~peptidyl-serine phosphorylation	16	0.367901	0.098537	HIPK4, MAST3, PKN3, MAST2, PRKCE, VRK2, TTBK1, TTBK2, UHMK1, SBK1, CAMKV, ULK3, ULK2, PRKACB, IKBKE, CSNK1G2	2611	65	15999	1.50832	1	1	1

## Sheet: Suppl_table12_MF,BP, KEGG_DoDEG
Category	Term	Count	%	PValue	Genes	List Total	Pop Hits	Pop Total	Fold Enrichment	Bonferroni	Benjamini	FDR
GOTERM_CC_DIRECT	GO:0005634~nucleus	1039	14.5051	1.23057e-19	ATF1, SPI1, POP7, ZNF292, EHMT2, LOC122420031, RBPJ, PSMD8, SPIB, ZC3H12D, SPIC, LOC122420279, PSMD2, ZC3H12A, GPBP1, BBX, PSMD1, PRKACA, LOC122434428, LOC122421594, ZNF281, CSNK2A2, LOC122420022, DICER1, PRKAB1, SND1, ABITRAM, TCEANC2, CGGBP1, OPTN, ATF3, ATF4, SF1, RABL6, ZNF276, EXD2, SET, SHMT2, AGAP2, CDCA7, MYNN, GATA6, IQGAP1, GATA2, OAZ1, HSPH1, LOC122432032, LTA4H, HACE1, LOC122423793, L…	4744	2723	15361	1.2355	9.13084e-17	9.13084e-17	9.08162e-17
GOTERM_MF_DIRECT	GO:0005515~protein binding	902	12.5925	1.50667e-16	ATF1, ITSN1, TSKU, PREX1, PSMD6, PPP4R1, PSMD7, ANKFY1, SAMD13, SAMD11, UNC5D, DICER1, SPINT1, LOC122423776, SKAP1, NLRX1, AASDH, AGAP2, MYNN, BAZ2A, BAZ2B, PLA2G6, DEDD2, RSU1, ZBTB7A, ZBTB7C, HACE1, FYB1, LOC122423311, EIF2AK3, ABTB1, TBL3, TBL2, AGO4, AGO2, ARHGAP9, LRRC1, ARHGAP4, PQBP1, APPL2, OFD1, MYBPC2, KCND1, CNOT6L, EIPR1, LRRC40, LOC122435798, TEX14, BAZ1A, DDB1, PELI1, RAPGEF6, PAFAH…	5161	2320	16442	1.23862	1.74971e-13	2.37451e-13	2.35342e-13
KEGG_PATHWAY	ccad05168:Herpes simplex virus 1 infection	206	2.87589	5.69087e-15	ZNF175, LOC122429640, LOC122420031, LOC122420030, LOC122420038, TBK1, LOC122420037, LOC122420279, ZNF606, LOC122420035, AKT2, ZNF605, AKT3, LOC122420719, AKT1, LOC122420718, LOC122421246, ZFP1, ZNF283, LOC122420022, LOC122420143, LOC122420021, HCFC2, LOC122420389, LOC122420388, TP53, ZNF157, ZNF275, PIK3R1, LOC122432837, LOC122420611, LOC122420610, LOC122420619, LOC122420618, FADD, LOC122420614, …	3140	431	10427	1.58716	1.99307e-12	2.00319e-12	1.26337e-12
GOTERM_MF_DIRECT	GO:0005524~ATP binding	474	6.61734	4.15573e-13	TRIO, ARAF, SMC2, TBK1, AKT2, AKT3, CDK20, AKT1, PRKACA, DDX17, PRKCG, PRKCH, LOC122431037, PRKCB, DAPK1, CSNK2A2, PRKCD, PRKCA, DICER1, PASK, CLPX, DDX39B, PRKD3, YME1L1, PRKCQ, PRKD2, PRKD1, TARS1, ABCB6, ABCB7, FIGNL2, HSPH1, LYN, CDK17, ABCA1, PLK3, CDK19, DMPK, ABCA3, EIF2AK1, PLK2, EIF2AK3, EIF2AK2, UCK1, CDK16, FARSB, LOC122423465, ABCC10, FARS2, IFIH1, IKBKB, TK1, RIOK1, JAK2, JAK1, HELLS…	5161	1152	16442	1.31083	6.54917e-10	3.27472e-10	3.24563e-10
KEGG_PATHWAY	ccad05169:Epstein-Barr virus infection	117	1.63339	1.9189e-11	RB1, LOC122429367, LOC122429640, LOC122429360, RBPJ, LOC122429364, LOC122429361, PSMD8, PSMD6, CCND3, PSMD7, CCND2, TBK1, AKT2, PSMD2, AKT3, AKT1, PSMD1, CIR1, SKP2, MAP3K7, IFNAR2, PDIA3, ENTPD1, USP7, TAP2, TAP1, RUNX3, LOC122429593, LOC122422848, CCNE1, BTK, TP53, IFNAR1, PSMD11, PSMD14, PSMD13, LOC122427080, PIK3R1, IRAK1, CD19, PLCG2, RIPK1, FADD, LYN, GADD45A, EIF2AK2, NFKB1, NFKB2, NFKBIA,…	3140	227	10427	1.71155	6.75452e-09	3.37726e-09	2.12998e-09
KEGG_PATHWAY	ccad05203:Viral carcinogenesis	114	1.59151	3.34073e-11	RB1, ATF2, HDAC11, UBE3A, RBPJ, CCND3, CCND2, CREB3L2, EP300, LOC122440602, LOC122423820, PRKACA, SKP2, LOC122426419, USP7, SCRIB, LOC122429192, ACTN4, SND1, LOC122429593, CCNE1, VDAC3, TBPL1, TP53, ATF4, LOC122430016, LOC122454266, LOC122430012, LOC122430011, PXN, UBR4, LOC122427080, PIK3R1, GTF2E1, GTF2E2, SCIN, LYN, EGR2, EGR3, EIF2AK2, NFKB1, NFKB2, NFKBIA, DLG1, HNRNPK, SNW1, CDK4, REL, LOC1…	3140	221	10427	1.71294	1.17594e-08	3.91979e-09	2.47214e-09
KEGG_PATHWAY	ccad04218:Cellular senescence	92	1.28438	1.21082e-10	RB1, LOC122429686, LIN54, MRE11, TRAF3IP2, LOC122429603, SERPINE1, PIK3CD, LOC122435446, FOXM1, ETS1, PPP1CC, PPP3CA, CCND3, PPP3CB, CCND2, PPP3CC, LOC122420753, RASSF5, AKT2, AKT3, AKT1, CAPN1, HRAS, LIN52, FBXW11, TSC2, TSC1, LOC122429593, CDC25A, TGFBR2, CCNA2, RBL2, LOC122445547, RBL1, PIK3CA, CCNE1, LOC122435630, VDAC3, VDAC2, VDAC1, SLC25A5, RAF1, SQSTM1, TP53, PPID, SLC25A6, LIN37, LOC1224…	3140	170	10427	1.79709	4.26209e-08	1.06552e-08	6.72006e-09
KEGG_PATHWAY	ccad04660:T cell receptor signaling pathway	73	1.01913	2.16129e-10	LOC122429249, PIK3CD, PPP2R2A, CD3G, CBLB, IKBKB, PPP3CA, PPP3CB, PPP3CC, PPP2R1A, GRAP2, AKT2, AKT3, AKT1, CTLA4, MAP3K8, IKBKG, HRAS, MAP3K7, NCK1, CHUK, PDPK1, PPP2R5B, PPP2R5A, PPP2R5C, RHOA, PIK3CA, LCK, PRKCQ, LCP2, RAF1, SOS1, LOC122454175, CARD11, PIK3R1, RASGRP1, RELA, MALT1, CDC42, PAK1, NRAS, MAPK8, PPP3R1, PPP2R3C, PAK6, FYN, PLCG1, ICOS, PAK3, PAK2, MAPK3, PAK4, LOC122434723, NFATC3,…	3140	126	10427	1.9239	7.60773e-08	1.52155e-08	9.59611e-09
KEGG_PATHWAY	ccad04144:Endocytosis	130	1.81488	3.6604e-10	WASHC5, TFRC, WIPF1, WIPF3, CBLB, IGF1R, LOC122435083, KIF5A, VPS35, WASHC1, SH3GL1, WASHC3, SH3GLB1, USP8, SH3GLB2, IST1, LOC122429593, ACAP2, RAB31, BIN1, RAB35, STAM2, RAB5B, LOC122430139, TSG101, RAB5C, LOC122424894, AGAP2, NEDD4L, LOC122427080, VPS26B, PLD2, SNX3, SNX4, GRK2, RAB11FIP1, GRK4, PIP5K1A, PIP5K1C, LOC122439581, RAB11FIP3, SNX5, RAB11FIP4, SNX6, SMAD2, RAB4A, SMAD3, SMURF2, IQSEC…	3140	269	10427	1.6048	1.28846e-07	1.95431e-08	1.23255e-08
KEGG_PATHWAY	ccad05132:Salmonella infection	141	1.96845	3.88641e-10	CYFIP2, NCKAP1, CYFIP1, FBXO22, ACTB, TXN2, LOC122435083, TUBB6, AKT2, LOC122420398, TUBB1, KIF5A, AKT3, TNFSF10, AKT1, KPNA4, KPNA3, MAP3K7, KPNA1, SKP1, LOC122428300, VPS33A, DYNC1LI1, DYNC1LI2, LOC122432087, PFN1, RAF1, ARL8B, RAB5B, RAB5C, TCF7, TXN, KLC1, HSP90B1, KLC4, IRAK1, PODXL, VPS11, LOC122435267, SNX9, RIPK1, NCKAP1L, LOC122430098, FADD, S100A10, MLKL, LOC122426544, M6PR, ARPC4, ARPC…	3140	298	10427	1.5712	1.36802e-07	1.95431e-08	1.23255e-08
KEGG_PATHWAY	ccad04120:Ubiquitin mediated proteolysis	89	1.2425	4.73979e-10	DET1, UBE2D4, UBE2D2, UBE2D3, UBE3A, CBLB, UBE2Z, PRPF19, UBE2L3, HERC4, HERC3, HERC2, UBE2Q1, HERC1, UBE2Q2, CDC26, CDC27, FBXO4, ELOB, SKP2, SKP1, PIAS4, FBXW11, UBE2E3, UBE2E1, UBE2QL1, UBE4A, MID1, RBX1, DDB1, UBE2R2, TRAF6, LOC122435279, ANAPC4, LOC122431671, NHLRC1, UBA52, BIRC3, PRKN, CUL7, CUL5, UBA7, UBA6, MGRN1, CUL3, NEDD4L, LOC122427080, KLHL13, CBL, RCHY1, RHOBTB2, UBE2J1, SOCS3, COP…	3140	166	10427	1.78038	1.66841e-07	2.08551e-08	1.31529e-08
KEGG_PATHWAY	ccad04141:Protein processing in endoplasmic reticulum	104	1.45191	6.26948e-10	UBE2D4, UBE2D2, UBE2D3, CAPN1, SIL1, MAP3K5, SEC63, SKP1, PDIA3, LMAN1L, PDIA6, PDIA4, RBX1, ERN1, TMEM258, SELENOS, LOC122435630, PLAA, LOC122431671, ATF4, LOC122430139, SAR1A, RPN1, SEL1L, HSPBP1, UBE2J1, HSP90B1, HSPH1, BAG2, LOC122435267, SSR1, TXNDC5, EDEM3, XBP1, WFS1, EDEM1, HSPA6, EIF2AK3, NSFL1C, NPLOC4, OSTC, DNAJC10, BCL2, STT3A, STT3B, NFE2L2, HSP90AB1, LOC122423465, LOC122421320, NGL…	3140	204	10427	1.69291	2.20686e-07	2.45206e-08	1.54647e-08
KEGG_PATHWAY	ccad04659:Th17 cell differentiation	68	0.949323	8.06332e-10	LOC122429367, LOC122429640, HSP90AB1, RORC, LOC122429360, RORA, CD3G, AHR, LOC122429364, LOC122429361, IKBKB, PPP3CA, PPP3CB, PPP3CC, IKBKG, JAK2, IL6R, JAK1, HSP90AA1, IL4R, CHUK, IL1R1, IFNGR1, IFNGR2, TYK2, FOXP3, TGFBR2, RUNX1, LCK, IRF4, LOC122429717, PRKCQ, LOC122421313, LOC122441627, LOC122429718, LOC122429860, IL2RG, HIF1A, RELA, MAPK8, PPP3R1, RXRA, TBX21, IL21R, LOC122429902, STAT6, PLC…	3140	117	10427	1.92998	2.83829e-07	2.83829e-08	1.79006e-08
KEGG_PATHWAY	ccad04380:Osteoclast differentiation	76	1.06101	1.35364e-09	SPI1, NCF1, NCF4, PIK3CD, ATP2A2, ATP2A1, TREM2, IKBKB, PPP3CA, PPP3CB, PPP3CC, AKT2, AKT3, AKT1, SIRPA, IKBKG, RAC1, MAP3K7, JAK1, IFNAR2, CHUK, SYK, IL1R1, IFNGR1, IFNGR2, MITF, TRAF2, TYK2, GAB2, TGFBR2, OSCAR, TNFRSF1A, LOC122448418, PIK3CA, LCK, TRAF6, BTK, LCP2, LOC122421511, SQSTM1, IFNAR1, LOC122421184, ITPR2, LOC122448423, TNFRSF11A, PIK3R1, RELA, RELB, LILRA5, SOCS3, MAPK8, PPP3R1, SOCS…	3140	137	10427	1.84214	4.76482e-07	4.33166e-08	2.7319e-08
KEGG_PATHWAY	ccad05170:Human immunodeficiency virus 1 infection	116	1.61943	2.59381e-09	DCAF1, TBK1, AKT2, CFL1, AKT3, AP1S2, AKT1, AP1S1, AP1S3, MAP3K7, SKP1, PRKCG, PDIA3, PRKCB, FBXW11, TAP2, TAP1, PRKCA, LOC122429593, RBX1, RAF1, CUL5, PXN, ITPR2, PIK3R1, CCNB3, CCNB1, GNG10, PPP3R1, IRAK1, PLCG2, RIPK1, PLCG1, FADD, LOC122426558, LOC122426540, LOC122450353, NFATC3, NFATC2, NFATC1, PTK2, NFKB1, NFKBIA, GNAO1, GNB2, GNB4, BCL2, CALM3, TAB2, ATM, TAB1, CALM2, MYD88, APOBEC3A, APOB…	3140	239	10427	1.61172	9.1302e-07	7.6085e-08	4.79854e-08
KEGG_PATHWAY	ccad05145:Toxoplasmosis	71	0.991205	7.84615e-09	ITGB1, LOC122429367, CIITA, LOC122429640, LOC122423465, LOC122429360, LOC122428193, LOC122429364, LOC122429361, IKBKB, CASP8, AKT2, CASP3, AKT3, AKT1, IKBKG, JAK2, MAP3K7, JAK1, CHUK, PDPK1, IFNGR1, IFNGR2, TYK2, IRAK4, TNFRSF1A, TRAF6, LOC122429717, ITGA6, LOC122430141, TLR4, BIRC3, LOC122429718, TLR2, LOC122430139, LOC122429860, LAMA3, GNAI3, GNAI1, RELA, PIK3R5, GNAI2, MAPK8, SOCS1, IRAK1, ALO…	3140	129	10427	1.82767	2.76184e-06	2.1245e-07	1.33988e-07
KEGG_PATHWAY	ccad04662:B cell receptor signaling pathway	52	0.725953	1.69305e-08	CD81, PIK3CD, IKBKB, PPP3CA, PPP3CB, PPP3CC, AKT2, AKT3, RAC2, AKT1, IKBKG, RAC1, HRAS, CR2, CHUK, SYK, PRKCB, PIK3CA, BANK1, BTK, LOC122421511, RAF1, SOS1, CARD11, LOC122421184, DAPP1, PIK3R1, RELA, MALT1, LILRA5, CD79A, NRAS, PPP3R1, CD19, LOC122421222, PLCG2, LOC122421229, MAPK3, LYN, LOC122421171, LOC122421172, NFATC3, NFATC2, NFATC1, NFKB1, NFKBIA, KRAS, PTPN6, NFKBIE, PIK3AP1, CD22, NFKBIB	3140	86	10427	2.00787	5.95951e-06	4.2568e-07	2.68469e-07
KEGG_PATHWAY	ccad05152:Tuberculosis	99	1.3821	3.15683e-08	LOC122429367, LOC122429640, LOC122429360, LOC122429364, LOC122429361, AKT2, LAMP2, AKT3, AKT1, EP300, LOC122427212, RFX5, CLEC4E, RAF1, LOC122424251, RAB5B, RAB5C, LOC122424255, CORO1A, PPP3R1, IRAK1, IRAK2, CLEC7A, LOC122424259, ATP6V0A2, FADD, PLK3, TGFB1, VDR, TGFB3, RFXANK, NFKB1, BCL2, CALM3, RAB5A, CALM2, MYD88, CIITA, ITGAM, TRADD, TCIRG1, LSP1, EEA1, PPP3CA, PPP3CB, LOC122420753, CASP8, P…	3140	203	10427	1.61945	1.1112e-05	7.40802e-07	4.67211e-07
KEGG_PATHWAY	ccad05163:Human cytomegalovirus infection	116	1.61943	3.58676e-08	RB1, ATF2, LOC122425049, LOC122425048, ELK1, TBK1, AKT2, CREB3L2, AKT3, AKT1, PRKACA, IL6R, PRKCG, PDIA3, PRKCB, IL1R1, TAP2, TAP1, TSC2, TSC1, PRKCA, LOC122429593, ADCY9, RAF1, TP53, ATF4, PXN, ITPR2, LOC122427080, PIK3R1, LOC122454307, GNG10, PPP3R1, EIF4EBP1, RIPK1, FADD, NFATC3, NFATC2, NFATC1, PTK2, NFKB1, NFKBIA, GNAO1, CDK4, SP1, GNB2, GNB4, CALM3, CALM2, LOC122429686, LOC122429603, LOC122…	3140	248	10427	1.55323	1.26253e-05	7.54591e-07	4.75907e-07
KEGG_PATHWAY	ccad05135:Yersinia infection	78	1.08893	3.64433e-08	ITGB1, WIPF1, ARPC1B, ARPC1A, WIPF3, PIK3CD, ACTB, IKBKB, LOC122435083, RPS6KA3, RPS6KA6, TBK1, AKT2, RPS6KA2, RPS6KA1, AKT3, RAC2, AKT1, IKBKG, RAC1, MAP3K7, ACTR3, ACTR2, LOC122424660, ARHGEF12, CHUK, ITGA4, RHOG, TRAF2, IRAK4, RHOA, PIK3CA, IRF3, LCK, TRAF6, ARHGEF1, LCP2, ITGA5, CRK, TLR4, LOC122434658, ROCK1, ROCK2, SRC, PXN, WAS, PIK3R1, MEFV, RELA, CDC42, MAPK8, IRAK1, PTK2B, PIP5K1A, PLCG…	3140	150	10427	1.72676	1.2828e-05	7.54591e-07	4.75907e-07
KEGG_PATHWAY	ccad05161:Hepatitis B	93	1.29834	5.0553e-08	RB1, ATF2, DDX3X, YWHAB, ARAF, PIK3CD, FASLG, ELK1, IFIH1, IKBKB, CASP8, TBK1, AKT2, CASP3, AKT3, CREB3L2, EP300, AKT1, IKBKG, JAK2, HRAS, MAP3K7, JAK1, PRKCG, CHUK, APAF1, ATP6AP1, PRKCB, PRKCA, TYK2, IRAK4, YWHAZ, HSPG2, TGFBR2, DDB1, CCNA2, PIK3CA, IRF3, CCNE1, TRAF6, IRF7, VDAC3, RAF1, SOS1, TP53, TLR4, TLR3, IFNAR1, LOC122441627, ATF4, CREB5, TLR2, PCNA, ATF6B, SRC, PIK3R1, RELA, NRAS, MAPK8…	3140	189	10427	1.634	1.77945e-05	9.88592e-07	6.23487e-07
KEGG_PATHWAY	ccad04140:Autophagy - animal	94	1.3123	5.7758e-08	MTMR14, PIK3CD, IRS2, CTSV, ZFYVE1, IGF1R, RPTOR, MAP1LC3B, TBK1, RB1CC1, AKT2, LAMP2, AKT3, MLST8, AKT1, EPG5, PRKACA, CTSD, HRAS, SNAP29, MAP3K7, RAB8A, SH3GLB1, GABARAPL2, RUBCN, GABARAPL1, DAPK1, PDPK1, VPS33A, PRKCD, LOC122432124, STX7, TSC2, WIPI1, TSC1, WIPI2, ATG14, PRAP1, ERN1, RRAGA, PIK3CA, GORASP2, RRAGB, TRAF6, GORASP1, DDIT4, AKT1S1, LOC122435279, ATG4C, TAX1BP1, SMCR8, ATG4A, PRKCQ…	3140	192	10427	1.62576	2.03306e-05	1.03013e-06	6.49685e-07
KEGG_PATHWAY	ccad05140:Leishmaniasis	54	0.753874	5.85302e-08	ITGB1, LOC122429367, LOC122429640, ITGAM, NCF1, LOC122424037, NCF4, LOC122429360, LOC122436414, LOC122429364, ELK1, LOC122429361, LOC122455175, LOC122427624, JAK2, MAP3K7, JAK1, ITGA4, PRKCB, IFNGR1, IFNGR2, IRAK4, EEF1A1, TRAF6, LOC122429717, TLR4, LOC122429718, TLR2, LOC122429860, LOC122435269, RELA, LOC122431989, IRAK1, LOC122429902, LOC122420817, MAPK3, MARCKSL1, TGFB1, NOS2, LOC122429977, TG…	3140	93	10427	1.92815	2.06024e-05	1.03013e-06	6.49685e-07
KEGG_PATHWAY	ccad04658:Th1 and Th2 cell differentiation	56	0.781795	1.70628e-07	LOC122429367, LOC122429640, MAML1, LOC122429360, CD3G, RBPJ, LOC122429364, LOC122429361, IKBKB, PPP3CA, PPP3CB, PPP3CC, IKBKG, JAK2, JAK1, IL4R, CHUK, IFNGR1, IFNGR2, TYK2, RUNX3, MAF, LCK, LOC122429717, PRKCQ, LOC122441627, LOC122429718, NOTCH2, NOTCH1, LOC122429860, LOC122432993, IL2RG, RELA, MAPK8, PPP3R1, TBX21, STAT4, LOC122429902, STAT6, PLCG1, MAPK3, LOC122429977, LOC122429976, STAT1, NFAT…	3140	100	10427	1.85959	6.00593e-05	2.86005e-06	1.80378e-06
KEGG_PATHWAY	ccad05417:Lipid and atherosclerosis	113	1.57755	1.78858e-07	NCF1, NCF4, TBK1, AKT2, AKT3, TNFSF10, AKT1, MAP3K7, MAP3K5, PRKCA, ERN1, LOC122432087, TP53, ATF4, LOC122430139, LOC122435269, LOC122449754, PIK3R1, AGER, HSP90B1, RAP1B, PPP3R1, RAP1A, IRAK1, LOC122436632, LOC122435267, PLCG1, LYN, ABCA1, XBP1, HSPA4, HSPA6, NFATC3, EIF2AK3, NFATC2, NFATC1, POU2F2, SELE, PTK2, NFKB1, NFKBIA, BCL2, CALM3, TAB2, TAB1, CALM2, MYD88, NFE2L2, HSP90AB1, LOC122423465,…	3140	246	10427	1.52536	6.29559e-05	2.86172e-06	1.80484e-06
KEGG_PATHWAY	ccad04071:Sphingolipid signaling pathway	67	0.935362	1.8735e-07	LOC122429249, TRADD, PIK3CD, PPP2R2A, SMPD2, SPTLC2, PPP2R1A, SMPD1, AKT2, AKT3, RAC2, AKT1, RAC1, CTSD, HRAS, MAP3K5, PRKCG, ABCC1, CERS5, CERS6, PDPK1, PRKCB, PPP2R5B, PPP2R5A, PRKCA, TRAF2, PPP2R5C, GAB2, RHOA, TNFRSF1A, PIK3CA, RAF1, MS4A2, PLCB2, TP53, LOC122454175, NSMAF, ASAH1, SGMS1, ROCK1, ROCK2, GNAI3, PIK3R1, SGMS2, GNAI1, RELA, PLD2, GNAI2, GNA13, NRAS, SGPL1, MAPK8, PPP2R3C, GNA12, S…	3140	127	10427	1.75187	6.5945e-05	2.86727e-06	1.80833e-06
KEGG_PATHWAY	ccad05235:PD-L1 expression and PD-1 checkpoint pathway in cancer	53	0.739913	2.87703e-07	PIK3CD, CD3G, IKBKB, PPP3CA, PPP3CB, PPP3CC, AKT2, AKT3, AKT1, IKBKG, JAK2, HRAS, JAK1, CHUK, IFNGR1, IFNGR2, CSNK2A2, EML4, PIK3CA, LCK, TRAF6, CSNK2B, PRKCQ, RAF1, TLR4, TLR2, PIK3R1, HIF1A, RASGRP1, RELA, NRAS, PPP3R1, PLCG1, MAPK3, STAT1, STAT3, NFATC3, NFATC2, NFATC1, MAPK14, NFKB1, MAPK13, NFKBIA, CD4, RPS6KB1, CD28, KRAS, PTPN6, PDCD1, NFKBIE, LAT, MYD88, NFKBIB	3140	94	10427	1.87231	0.000101266	4.21964e-06	2.66125e-06
GOTERM_BP_DIRECT	GO:0006357~regulation of transcription by RNA polymerase II	425	5.93327	3.33395e-07	ATF1, RB1, ATF2, SPI1, ZNF292, LOC122420031, RBPJ, BACH1, ELK1, BACH2, ELK3, ELK4, SPIB, SPIC, LOC122420038, ZSCAN31, ZMIZ1, ZSCAN30, LOC122420035, ZXDC, CREB3L2, BBX, LOC122421246, PKNOX1, PKNOX2, ZNF283, LOC122421594, ZNF281, LOC122420022, SOX13, LOC122420021, ZSCAN20, LOC122420389, ZSCAN22, ZSCAN21, RFX5, ZSCAN26, CGGBP1, ATF3, ATF4, ZSCAN29, ZNF397, ZNF276, ZNF275, ZNF395, ZNF394, LOC12245426…	5096	1094	15999	1.21965	0.000856458	0.000856492	0.000855492
GOTERM_CC_DIRECT	GO:0005737~cytoplasm	801	11.1825	3.35378e-07	PID1, ITSN1, TBK1, DPYSL2, FRS2, DICER1, FRS3, PRKAB1, RUFY3, DDIT4, PSME1, PADI2, IDNK, PADI4, IDO2, SKAP1, OPTN, IDO1, LOC122422208, EXD2, PADI6, SHMT2, LOC122424894, TPRG1L, NCAPG, IQGAP1, IQGAP2, OAZ1, PRPSAP1, LOC122430098, ATG7, ATG5, TOE1, PKIB, ABTB1, UCK1, NMT1, CDIN1, DZIP1, PKIG, DZIP3, LOC122430083, ARF3, ARHGAP9, ARF4, LOC122422254, ARHGAP4, PQBP1, IKBKB, SMPD3, PCMTD2, SMPD2, TUBA1B…	4744	2260	15361	1.14762	0.00024882	0.000124425	0.000123755
KEGG_PATHWAY	ccad05167:Kaposi sarcoma-associated herpesvirus infection	102	1.42398	4.38575e-07	CD86, RB1, LOC122425049, LOC122425048, PREX1, ZFP36, TBK1, AKT2, AKT3, AKT1, EP300, IFNAR2, LOC122429598, LOC122429597, LOC122429596, ATG14, LOC122429593, RAF1, TP53, UBA52, IFNAR1, TCF7, ITPR2, PIK3R1, HIF1A, PIK3R5, GNG10, PPP3R1, UBB, PLCG2, PLCG1, FADD, LYN, NFATC3, EIF2AK2, NFATC2, NFATC1, NFKB1, NFKBIA, CDK4, GNB2, GNB4, CALM3, CALM2, LOC122429686, LOC122429603, TRADD, LOC122423222, PIK3CD,…	3140	220	10427	1.5396	0.000154367	6.17514e-06	3.89455e-06
KEGG_PATHWAY	ccad05166:Human T-cell leukemia virus 1 infection	115	1.60547	5.68632e-07	RB1, ATF2, LOC122429367, SPI1, CRTC3, LOC122429640, LOC122429360, LOC122429364, ETS1, ELK1, ETS2, LOC122429361, ELK4, ZFP36, CCND3, CCND2, PTTG1, AKT2, CDC26, CREB3L2, CDC27, AKT3, AKT1, EP300, PRKACA, IL1R1, IL1R2, LOC122429593, ADCY9, CCNE1, VDAC3, VDAC2, ANAPC4, TBPL1, VDAC1, TLN1, TP53, ATF4, PIK3R1, PPP3R1, SMAD2, SMAD4, EGR2, SMAD3, TGFB1, TGFB3, NFATC3, NFATC2, NFATC1, NFKB1, NFKB2, NFKBIA…	3140	256	10427	1.49172	0.000200139	7.6984e-06	4.85524e-06
GOTERM_CC_DIRECT	GO:0005794~Golgi apparatus	108	1.50775	6.6458e-07	LOC122422296, GALNT18, GOLIM4, ZDHHC7, MANEA, ZDHHC2, ZDHHC3, ZDHHC4, GOLGA4, GNPTAB, STK16, TRAPPC12, ZFPL1, SLC30A7, RAB2A, SLC30A5, TANGO2, SLC35C2, APLP1, RAB32, TPST2, TPST1, RAB37, SLC9A8, RAB38, OPTN, LOC122428697, TMEM87A, CUL7, LOC122427243, TMED10, PARM1, SLC35D2, GLT8D1, ARL1, LOC122427080, TMEM241, C29H11ORF24, VTI1A, DYM, CERT1, NDFIP2, NDFIP1, LOC122454316, SLC35E1, CAV1, M6PR, RABL…	4744	232	15361	1.50734	0.000492997	0.000164373	0.000163487
GOTERM_BP_DIRECT	GO:0006468~protein phosphorylation	182	2.54083	7.56478e-07	TRIO, TP53RK, PRAG1, ARAF, RPS6KA3, STK10, RPS6KA6, SLK, AKT2, RPS6KA2, RPS6KA1, AKT3, STK16, CDK20, AKT1, PDK3, NEK2, MAP3K8, STK32A, MAP3K6, MAP3K7, EPHB4, MAP3K5, CDKL2, PDGFRB, PRKCG, ACVR1, PRKCH, CDKL5, DAPK1, PRKCB, CSNK2A2, PRKCD, LMTK3, CASK, LMTK2, PRKCA, PASK, NRBP1, ERN1, PRKD3, SIK3, TSSK6, SIK1, TRIB3, PRKD2, ROR2, PRKD1, ALPK2, SIK2, TNIK, TSSK4, ALPK1, TRIB1, RAF1, EPHA2, PXK, PKD…	5096	421	15999	1.35723	0.00194226	0.000971696	0.000970561
KEGG_PATHWAY	ccad04145:Phagosome	84	1.17269	1.20256e-06	ITGB1, LOC122429686, SCARB1, LOC122429367, LOC122429640, ITGAM, NCF1, TFRC, LOC122429603, NCF4, LOC122429360, TCIRG1, CTSV, LOC122429364, FCAR, ACTB, LOC122429361, EEA1, SEC61A1, TUBA1B, TUBB6, SEC61G, MRC1, TUBB1, LAMP2, OLR1, ITGAV, LOC122421324, SEC61B, RAC1, ATP6V1E1, ATP6V1G1, ATP6V0E1, ATP6AP1, ITGA2, TUBB, STX7, TAP2, TAP1, LOC122429593, DYNC1LI1, DYNC1LI2, CANX, ATP6V1B2, LOC122429717, PI…	3140	176	10427	1.58488	0.000423214	1.56779e-05	9.88776e-06
KEGG_PATHWAY	ccad05164:Influenza A	90	1.25646	1.26364e-06	LOC122429367, CIITA, LOC122429640, NXT1, TRADD, LOC122429360, PIK3CD, FASLG, LOC122429364, ACTB, LOC122429361, IFIH1, IKBKB, CCND3, CASP8, TBK1, AKT2, CASP3, AKT3, KPNA6, TNFSF10, EP300, AKT1, TRIM25, IKBKG, KPNA5, JAK2, PRSS2, KPNA1, JAK1, IFNAR2, CHUK, RSAD2, APAF1, PRKCB, IFNGR1, IFNGR2, PRKCA, TYK2, IRAK4, TNFRSF1A, DNAJC3, LOC122422848, PIK3CA, HNRNPUL1, IRF3, IRF7, LOC122429717, TLR7, VDAC1…	3140	192	10427	1.55658	0.000444704	1.58858e-05	1.00189e-05
KEGG_PATHWAY	ccad05200:Pathways in cancer	222	3.09926	1.40649e-06	RB1, SPI1, ARAF, ELK1, RASSF1, EDNRB, TFG, RASSF5, AKT2, AKT3, AKT1, PRKACA, SKP2, SKP1, PRKCG, DAPK1, PRKCB, FLT3LG, PRKCA, RUNX1, EML4, ADCY9, LOC122429517, TP53, CTBP1, LPAR1, MGST1, TGFA, PIK3R1, HIF1A, GNG10, PLCG2, HMOX1, PLCG1, FADD, WNT10A, FZD5, GADD45A, FZD7, FZD9, IGF2, FN1, PTK2, CALM3, CALM2, CDKN1B, BBC3, IKBKB, LOC122420753, HEY2, RAC2, LOC122434354, ELOB, RAC1, IKBKG, JAK2, HRAS, …	3140	564	10427	1.30708	0.000494964	1.70719e-05	1.0767e-05
GOTERM_MF_DIRECT	GO:0046872~metal ion binding	95	1.32626	1.43302e-06	RBM27, PLEKHF2, PLEKHF1, PPP1R10, LOC122451652, LOC122435446, IDE, LOC122430558, ZFYVE1, LOC122432858, EEA1, ZC3H12D, FYCO1, ZFP36, ZFYVE26, ZC3H7A, ZC3H7B, ACP7, ANKFY1, PMPCA, TRMT44, MMUT, NUDT13, ZC3H10, ZGPAT, RC3H1, RBSN, ZFX, TOPORS, RC3H2, LOC122450618, TGFBR2, ARMC1, PCCA, RUFY3, PITPNM2, WDFY1, ZNF711, WDFY3, WDFY2, IDO2, MOCS1, GART, RBM22, OBI1, IDO1, LOC122432998, RPE, ENDOD1, U2AF1,…	5161	198	16442	1.52855	0.00225589	0.000752814	0.000746126
KEGG_PATHWAY	ccad04068:FoxO signaling pathway	67	0.935362	1.63213e-06	CDKN1B, PRKAG1, ARAF, PIK3CD, IRS2, FASLG, IGF1R, IKBKB, CCND2, AKT2, AKT3, TNFSF10, EP300, AKT1, SKP2, HRAS, GABARAPL2, GABARAPL1, USP7, CHUK, PDPK1, PRMT1, PRKAB1, TGFBR2, RBL2, PIK3CA, RAF1, SOS1, SGK1, SGK2, PRKAA1, AGAP2, LOC122427080, FOXO4, PIK3R1, STK4, FOXO3, LOC122432714, FOXO1, CCNB3, CCNB1, NRAS, MAPK8, S1PR1, LOC122423369, S1PR4, MAPK3, PCK2, PLK3, CDKN2B, SMAD4, SMAD3, TGFB1, TGFB3,…	3140	133	10427	1.67283	0.000574345	1.90459e-05	1.20119e-05
KEGG_PATHWAY	ccad04722:Neurotrophin signaling pathway	65	0.907441	1.67733e-06	PRDM4, PIK3CD, FASLG, IKBKB, RPS6KA3, RPS6KA6, LOC122420753, AKT2, RPS6KA2, RPS6KA1, AKT3, ARHGDIB, AKT1, RAC1, HRAS, MAP3K5, PDPK1, PRKCD, FRS2, IRAK3, IRAK4, RHOA, LOC122445547, PIK3CA, TRAF6, RAPGEF1, RAF1, SOS1, CRK, TP53, ATF4, CAMK2D, SHC1, MAGED1, PIK3R1, FOXO3, RELA, RAP1B, CDC42, NRAS, MAPK8, RAP1A, IRAK1, IRAK2, PLCG2, PLCG1, SH2B2, SH2B1, MAPK3, NGFR, MAP3K1, KIDINS220, BAD, MAPK14, NF…	3140	128	10427	1.68629	0.000590248	1.90459e-05	1.20119e-05
GOTERM_MF_DIRECT	GO:0004674~protein serine/threonine kinase activity	85	1.18665	2.20109e-06	SMG1, DYRK3, GSK3A, TP53RK, MAST4, STK10, TBK1, SLK, AKT2, AKT3, STK16, TLK2, PIM1, AKT1, TLK1, PIM3, RIOK1, PIM2, CSNK1G3, DAPK1, PDPK1, CSNK2A2, DYRK1A, VRK1, IRAK3, IRAK4, OXSR1, PASK, VRK3, LATS1, ERN1, GAK, LATS2, PRKD3, SIK3, TSSK6, FAM20C, SIK1, PRKD2, ULK1, ALPK2, PRKD1, SIK2, TSSK4, ALPK1, SGK1, SGK2, CSNK1G1, STK39, PIK3R4, PRKX, STK4, PAK1, NUAK1, NUAK2, STK35, STK38, PAK6, STK38L, LOC…	5161	174	16442	1.55629	0.00346291	0.000867229	0.000859525
KEGG_PATHWAY	ccad04666:Fc gamma R-mediated phagocytosis	55	0.767835	2.4738e-06	NCF1, ARPC1B, ARPC1A, PIK3CD, LOC122435083, AKT2, CFL1, AKT3, RAC2, AKT1, RAC1, PRKCG, ACTR3, ACTR2, LOC122424660, SYK, PRKCB, PRKCD, PLA2G4A, PRKCA, GAB2, PIK3CA, BIN1, RAF1, PLPP3, CRK, PLPP1, ASAP3, WAS, PIK3R1, PLA2G6, PLD2, LOC122431989, CDC42, PAK1, SCIN, PLCG2, PIP5K1A, PLCG1, PIP5K1C, LOC122426558, WASF2, MAPK3, LYN, LOC122426540, MARCKSL1, GSN, MYO10, ARPC4, ARPC5, MARCKS, PTPRC, ARPC2, …	3140	104	10427	1.75614	0.000870399	2.66833e-05	1.68287e-05
KEGG_PATHWAY	ccad04064:NF-kappa B signaling pathway	57	0.795756	2.50156e-06	TRADD, TNFAIP3, LOC122428192, IKBKB, PPP1R13L, TRIM25, IKBKG, ERC1, MAP3K7, PIAS4, PARP1, CHUK, SYK, IL1R1, PRKCB, CSNK2A2, TRAF2, IRAK4, TRAF1, TNFRSF1A, LCK, TRAF6, CSNK2B, BTK, PRKCQ, LTB, TLR4, CARD11, BIRC3, BCL2A1, TNFRSF11A, RELA, MALT1, RELB, IRAK1, LOC122436632, PLCG2, RIPK1, PLCG1, LYN, UBE2I, TNFSF14, GADD45A, CFLAR, NFKB1, NFKB2, NFKBIA, CYLD, CD40LG, BCL2, TAB3, ATM, TAB2, TAB1, LTBR…	3140	109	10427	1.73651	0.000880163	2.66833e-05	1.68287e-05
GOTERM_MF_DIRECT	GO:0061630~ubiquitin protein ligase activity	84	1.17269	3.44049e-06	RNF13, LTN1, RNF19B, UBE3A, CBLB, PRPF19, HERC5, HERC4, RNF114, HERC2, MAEA, TRIM3, ARIH2, ARIH1, RNF111, SHPRH, NHLRC3, FBXO17, MSL2, TOPORS, RBX1, RNF144A, RNF144B, RNF167, RNF125, TRAF6, PELI1, NHLRC1, ZNF598, RNF166, PRKN, RNF31, RNF34, UHRF2, UHRF1, MGRN1, PELI2, NEDD4L, UBR3, UBR2, LOC122427080, UBR1, CBL, RCHY1, RNF5, RNFT1, COP1, HECTD1, RMND5A, UBR7, RNF170, RFFL, RNF175, RNF20, ANKIB1, …	5161	173	16442	1.54687	0.00540754	0.00108444	0.00107481
KEGG_PATHWAY	ccad04933:AGE-RAGE signaling pathway in diabetic complications	54	0.753874	6.28941e-06	CDKN1B, SERPINE1, PIK3CD, AKT2, CASP3, AKT3, PIM1, AKT1, RAC1, JAK2, HRAS, PRKCB, PRKCD, PRKCA, TGFBR2, PIK3CA, COL4A1, COL4A3, PLCB2, LOC122441627, LOC122435269, PIK3R1, AGER, FOXO1, RELA, CDC42, NRAS, MAPK8, LOC122436632, PLCG2, PLCG1, MAPK3, SMAD2, SMAD4, SMAD3, TGFB1, TGFB3, STAT1, STAT3, VEGFB, FN1, VEGFC, NFATC1, MAPK14, SELE, NFKB1, VEGFA, MAPK13, CDK4, BCL2, BAX, KRAS, PLCD4, PLCD1	3140	104	10427	1.72421	0.00221143	6.51139e-05	4.10661e-05
GOTERM_MF_DIRECT	GO:0003924~GTPase activity	136	1.89865	6.78172e-06	RASL11B, RAB3D, RASL11A, ARHGAP35, RAB43, TUBB6, TUBB1, LOC122427624, RAB2A, ARL15, GTPBP2, GTPBP1, EEF1A1, RAB32, RRAGA, RAB31, RRAGB, RAB37, RAB35, GUF1, RAB38, ARL8B, RAB5B, RAB5C, SAR1A, ARL6, LOC122422199, LOC122424894, AGAP2, ARL1, ARL2, LOC122454307, DNAJC27, GSPT2, GSPT1, RHOBTB2, RAP1B, RHOT2, CRACR2A, RAP1A, LOC122438655, LOC122430098, LOC122432032, EEFSEC, RAB4A, RAB4B, RABL2B, RAB27A,…	5161	313	16442	1.38425	0.0106311	0.00178133	0.00176551
KEGG_PATHWAY	ccad04625:C-type lectin receptor signaling pathway	55	0.767835	7.49365e-06	PIK3CD, CBLB, LSP1, IKBKB, PPP3CA, PPP3CB, CASP8, PPP3CC, LOC122420753, AKT2, AKT3, AKT1, IKBKG, HRAS, ARHGEF12, CHUK, SYK, PRKCD, RHOA, LOC122445547, PIK3CA, CLEC4E, RAF1, SRC, ITPR2, LOC122427080, PIK3R1, RELA, MALT1, RELB, PAK1, NRAS, MAPK8, PPP3R1, CLEC7A, PLCG2, MAPK3, PLK3, EGR2, EGR3, LOC122433435, STAT1, NFATC3, NFATC2, NFATC1, MAPK14, NFKB1, MAPK13, NFKB2, NFKBIA, CYLD, BCL3, KRAS, CALM3…	3140	107	10427	1.7069	0.0026343	7.53647e-05	4.75312e-05
KEGG_PATHWAY	ccad05212:Pancreatic cancer	44	0.614268	8.21173e-06	RB1, RALB, ARAF, PIK3CD, TGFA, PIK3R1, RELA, PLD2, IKBKB, CDC42, MAPK8, AKT2, AKT3, RAC2, AKT1, E2F2, E2F3, BAK1, IKBKG, RAC1, MAPK3, JAK1, SMAD2, RALBP1, SMAD4, SMAD3, TGFB1, CHUK, TGFB3, GADD45A, STAT1, BAD, STAT3, NFKB1, TGFBR2, VEGFA, RPS6KB1, PIK3CA, CDK4, BAX, KRAS, RAF1, TP53, ARHGEF6	3140	80	10427	1.82639	0.00288637	8.02924e-05	5.0639e-05
GOTERM_CC_DIRECT	GO:0005730~nucleolus	76	1.06101	8.39417e-06	LOC122454607, NOC2L, TENT4A, TENT4B, RRP8, CDC14A, WDR43, CDC14B, RDM1, FBL, NKRF, BUD23, UTP14A, RPS13, UTP15, ABT1, UTP11, NGDN, WDR74, WDR75, IMP4, URB2, TRAF7, FRG1, MRTO4, CCDC86, TOP1, UTP25, DDX24, DHX9, NIP7, PRKRIP1, NOP2, MAK16, NOLC1, SNU13, RPF2, SDAD1, SPTY2D1, LOC122432637, DEDD2, RPF1, EXOSC6, EXOSC5, EMG1, RNF213, PDCD11, DHX33, ERI1, PES1, BRIX1, UTP20, SLX9, LYAR, KLHDC3, NOP14,…	4744	158	15361	1.55751	0.00620914	0.00155712	0.00154872
KEGG_PATHWAY	ccad04010:MAPK signaling pathway	129	1.80092	9.74884e-06	ATF2, ARAF, ELK1, IGF1R, ELK4, RPS6KA3, RPS6KA6, AKT2, RPS6KA2, RPS6KA1, STMN1, AKT3, AKT1, MAP3K8, PRKACA, MAP3K6, MAP3K7, MAP3K5, PDGFRB, LOC122427453, PRKCG, PRKCB, IL1R1, HGF, CACNA2D2, FLT3LG, PRKCA, MAPK8IP2, MAPK8IP3, CACNB3, CACNB4, MAPKAPK3, RAF1, TP53, ATF4, EPHA2, LOC122430139, TGFA, CACNA1C, RASGRP2, STK4, RASGRP1, CACNA1H, RAP1B, PPP3R1, RAP1A, IRAK1, PDGFD, MAP3K20, FGF23, NGFR, TGF…	3140	308	10427	1.39081	0.00342573	9.14987e-05	5.77066e-05
KEGG_PATHWAY	ccad04370:VEGF signaling pathway	35	0.488622	9.8777e-06	SRC, SH2D2A, PXN, HSPB1, PIK3CD, PIK3R1, CDC42, PPP3CA, PPP3R1, NRAS, PPP3CB, PPP3CC, AKT2, AKT3, PLCG2, RAC2, AKT1, PLCG1, RAC1, HRAS, MAPK3, PRKCG, BAD, PRKCB, PLA2G4A, NFATC2, PRKCA, MAPK14, PTK2, MAPK13, VEGFA, MAPKAPK3, PIK3CA, KRAS, RAF1	3140	59	10427	1.96991	0.00347093	9.14987e-05	5.77066e-05
KEGG_PATHWAY	ccad05215:Prostate cancer	53	0.739913	1.0848e-05	RB1, HSP90AB1, CDKN1B, ARAF, PIK3CD, IGF1R, IKBKB, AKT2, AKT3, CREB3L2, EP300, AKT1, IKBKG, HRAS, PDGFRB, HSP90AA1, CHUK, PDPK1, IL1R2, PIK3CA, SPINT1, CCNE1, LOC122421313, ERG, LOC122431193, RAF1, SOS1, TP53, ATF4, CREB5, LOC122431348, TCF7, LEF1, TGFA, LOC122427080, PIK3R1, FOXO1, RELA, HSP90B1, NRAS, PDGFD, LOC122435267, E2F2, E2F3, MAPK3, TCF7L2, BAD, NFKB1, NFKBIA, BCL2, CTNNB1, KRAS, FGFR2	3140	103	10427	1.70871	0.00381123	9.61095e-05	6.06145e-05
KEGG_PATHWAY	ccad04668:TNF signaling pathway	62	0.865559	1.09215e-05	ATF2, TRADD, PIK3CD, TNFAIP3, LOC122428192, IKBKB, CASP7, CASP8, AKT2, CASP3, AKT3, CREB3L2, AKT1, MAP3K8, IKBKG, DNM1L, MAP3K7, MAP3K5, RHBDF1, CHUK, RIPK3, RHBDF2, TRAF2, TRAF1, TNFRSF1B, TNFRSF1A, ADAM17, PIK3CA, FRMD8, BIRC3, ATF4, CREB5, CEBPB, ATF6B, PIK3R1, NOD2, RELA, SOCS3, BAG4, MAPK8, LOC122436632, RIPK1, FADD, MAPK3, MLKL, LOC122428005, VEGFC, CFLAR, MAPK14, SELE, NFKB1, MAPK13, NFKBI…	3140	126	10427	1.634	0.00383702	9.61095e-05	6.06145e-05
KEGG_PATHWAY	ccad04152:AMPK signaling pathway	61	0.851598	1.31262e-05	CAB39L, LOC122429249, PRKAG1, PIK3CD, PPP2R2A, IRS2, IGF1R, RPTOR, LIPE, GYS1, PPP2R1A, AKT2, AKT3, CREB3L2, AKT1, MLYCD, MAP3K7, RAB8A, RAB2A, SREBF1, CPT1A, PDPK1, STRADA, STRADB, PPP2R5B, TSC2, PPP2R5A, TSC1, PPP2R5C, CPT1C, PRKAB1, CCNA2, TBC1D1, PIK3CA, AKT1S1, ULK1, FBP1, LOC122454175, CREB5, PFKFB2, PFKFB4, PRKAA1, PFKFB3, CAB39, HMGCR, PIK3R1, FOXO3, ADIPOR2, LOC122432714, FOXO1, PPP2R3C,…	3140	124	10427	1.63357	0.00460978	0.000110302	6.95656e-05
KEGG_PATHWAY	ccad04217:Necroptosis	87	1.21457	1.31611e-05	PYGB, HSP90AB1, LOC122429327, TRADD, TNFAIP3, FASLG, CASP8, SMPD1, FTH1, CHMP1B, CHMP1A, TNFSF10, CAPN1, JAK2, DNM1L, GLUL, JAK1, IFNAR2, ZBP1, LOC122422040, HSP90AA1, PARP1, RIPK3, IFNGR1, IFNGR2, LOC122426323, PLA2G4A, TRAF2, TYK2, LOC122434904, TNFRSF1A, LOC122435630, VDAC3, VDAC2, LOC122427539, VDAC1, LOC122421313, LOC122432087, RBCK1, SLC25A5, PPIA, SQSTM1, CHMP7, TLR4, TLR3, PPID, IFNAR1, C…	3140	193	10427	1.4969	0.00462201	0.000110302	6.95656e-05
KEGG_PATHWAY	ccad04150:mTOR signaling pathway	84	1.17269	1.35489e-05	LOC122425560, PRR5, WNT2B, LOC122429801, CAB39L, PIK3CD, IGF1R, RPTOR, IKBKB, RPS6KA3, FLCN, RPS6KA6, AKT2, RPS6KA2, RPS6KA1, AKT3, SESN2, MLST8, AKT1, ATP6V1E1, SKP2, HRAS, PRKCG, LOC122427453, ATP6V1G1, SEC13, CHUK, PDPK1, STRADA, PRKCB, STRADB, RPS6, TSC2, PRKCA, TSC1, RHOA, TNFRSF1A, CLIP1, RRAGA, PIK3CA, RRAGB, DDIT4, AKT1S1, ATP6V1B2, ULK1, RAF1, SOS1, SGK1, EIF4E2, ATP6V1A, PRKAA1, SEH1L, …	3140	185	10427	1.50778	0.00475787	0.000110912	6.99499e-05
KEGG_PATHWAY	ccad04210:Apoptosis	75	1.04705	1.40571e-05	TRADD, PRF1, PIK3CD, CTSW, FASLG, CTSV, ACTB, BBC3, LMNB1, IKBKB, LOC122455090, TUBA1B, CTSO, CASP7, CASP8, CASP6, AKT2, CASP3, AKT3, TNFSF10, AKT1, CTSH, CTSF, IKBKG, CAPN1, CTSD, HRAS, SPTAN1, CTSC, MAP3K5, PARP3, PARP1, CHUK, APAF1, PDPK1, PARP2, TRAF2, TRAF1, TNFRSF1A, ERN1, PIK3CA, LOC122435630, IL3RA, LOC122432087, RAF1, TP53, BIRC3, ATF4, LOC122424372, BCL2A1, ITPR2, PIK3R1, RELA, NRAS, MA…	3140	161	10427	1.54691	0.0049359	0.000112457	7.09243e-05
GOTERM_CC_DIRECT	GO:0000139~Golgi membrane	54	0.753874	1.45808e-05	SLC35B3, SLC35B2, SYS1, PGAP2, SLC35B1, PGAP4, GOLIM4, PCSK7, LDLRAD4, IER3IP1, PCSK4, GOLGA5, PMEPA1, QSOX1, MAN1A1, SLC35A5, LMAN1L, ZDHHC13, CASD1, ZDHHC17, POMGNT1, RER1, MFNG, UNC50, SEC22B, ERGIC1, NAA60, SAMD8, SGMS1, GOSR1, USO1, FURIN, TEX261, SGMS2, ATP2C1, GLG1, LMAN1, LOC122444868, SCFD1, MAN2A2, CUX1, MAN2A1, STX5, MGAT2, RNF175, FKTN, RIC1, SLC35A3, TVP23A, YIF1B, RGP1, MYMX, COPG1,…	4744	104	15361	1.68126	0.0107607	0.00216379	0.00215213
GOTERM_MF_DIRECT	GO:0000978~RNA polymerase II cis-regulatory region sequence-specific DNA binding	321	4.48136	1.47951e-05	ATF1, LOC122420031, IKZF1, RBPJ, IKZF2, BACH1, LOC122432813, BACH2, IKZF5, LOC122420038, ZSCAN31, LOC122420279, ZSCAN30, ZNF606, SOX18, LOC122420035, MYB, LOC122421246, SOX8, PKNOX1, SOX6, PKNOX2, SOX5, SAMD11, MEF2A, ZFP1, ZNF283, LOC122421594, ZNF281, ZFP2, LOC122420022, SOX13, LOC122420021, SOX12, RUNX3, RUNX2, RUNX1, ZSCAN20, ZSCAN22, ZSCAN21, RFX5, ZSCAN26, TP53, ATF3, ZSCAN29, ZNF397, ZNF27…	5161	841	16442	1.21599	0.0230475	0.00333101	0.00330142
KEGG_PATHWAY	ccad04137:Mitophagy - animal	62	0.865559	1.49104e-05	CITED2, PHB2, RABGEF1, MAP1LC3B, TBK1, OPA1, FUNDC1, ARIH1, HRAS, TOMM70, USP8, GABARAPL2, BNIP3L, GABARAPL1, CSNK2A2, TFEB, MUL1, MITF, TRAF2, CSNK2B, LOC122435279, TAX1BP1, ULK1, RAB7B, SQSTM1, TP53, UBA52, OPTN, RAB7A, ATF4, PRKN, USP15, RAB5B, RAB5C, NLRX1, TOMM40, SRC, FOXO3, HIF1A, RELA, BCL2L13, NRAS, RHOT2, MAPK8, SAMM50, UBB, LOC122435464, MFN1, FIS1, SMURF2, MTX2, AMFR, SIAH1, EIF2AK3, …	3140	127	10427	1.62113	0.00523474	0.000116632	7.35579e-05
GOTERM_CC_DIRECT	GO:0005829~cytosol	302	4.21611	1.75116e-05	LTV1, CDA, IPO11, PANK2, MTRR, PANK3, TP53RK, RAPH1, ARAF, DIXDC1, PPP2R2A, PSMD8, TIAL1, LIPE, RABGEF1, RINL, RPS18, PSMD5, PPP4R4, DPYSL2, ANKS1A, GABARAPL2, GABARAPL1, CSNK2A2, LOC122432124, WDR73, PASK, SND1, TIAM1, LOC122435071, ARMC5, CLNS1A, RIN3, DXO, LOC122429517, RIN2, RABL6, SHMT2, AKAP17A, ADH5, LOC122432714, SCFD1, SEC14L1, RNF213, HSPH1, PRDX4, PRDX1, ASL, LTA4H, PCK2, BTF3, CDK19, …	4744	800	15361	1.22234	0.0129096	0.0021656	0.00215392
KEGG_PATHWAY	ccad05221:Acute myeloid leukemia	39	0.544465	2.01749e-05	CEBPA, SPI1, ITGAM, BCL2A1, LEF1, TCF7, ARAF, PIK3CD, PIK3R1, RELA, IKBKB, NRAS, AKT2, AKT3, PIM1, EIF4EBP1, AKT1, PIM2, IKBKG, HRAS, MAPK3, TCF7L2, CHUK, BAD, ZBTB16, STAT3, NFKB1, DUSP6, PML, RUNX1, CCNA2, RPS6KB1, PIK3CA, KIT, KRAS, RAF1, SOS1, LOC122441627, PPARD	3140	70	10427	1.8501	0.00707646	0.000154382	9.73656e-05
KEGG_PATHWAY	ccad04621:NOD-like receptor signaling pathway	87	1.21457	2.12321e-05	HSP90AB1, LOC122420990, TNFAIP3, LOC122428192, ANTXR2, TXN2, IKBKB, PANX1, PSTPIP1, MAP1LC3B, CASP8, TBK1, NAMPT, IKBKG, DNM1L, MAP3K7, GPSM3, JAK1, IFNAR2, GABARAPL2, GABARAPL1, HSP90AA1, LOC122432323, CHUK, RIPK3, PRKCD, TRAF2, TYK2, IRAK4, RHOA, LOC122422848, IRF3, TRAF6, IRF7, VDAC3, VDAC2, VDAC1, LOC122421313, RBCK1, PLCB2, TLR4, IFNAR1, BIRC3, RNF31, LOC122424251, NLRX1, LOC122424255, LOC12…	3140	195	10427	1.48154	0.00744591	0.000159015	0.000100288
KEGG_PATHWAY	ccad05165:Human papillomavirus infection	145	2.02429	2.54334e-05	RB1, PATJ, MAML1, LOC122429249, UBE3A, PPP2R2A, RBPJ, CCND3, CCND2, TBK1, PPP2R1A, AKT2, CREB3L2, AKT3, AKT1, EP300, PRKACA, ATP6V1E1, IFNAR2, PDGFRB, MAGI1, ATP6V1G1, ATP6V0E1, TSC2, TSC1, SCRIB, LOC122429593, CCNE1, COL4A1, MFNG, COL4A3, TBPL1, RAF1, TP53, LOC122454175, IFNAR1, NOTCH2, ATP6V1A, NOTCH1, NOTCH4, PXN, TCF7, UBR4, LOC122427080, PIK3R1, LOC122454307, FOXO1, EIF4EBP1, ATP6V0A2, FADD,…	3140	359	10427	1.34123	0.00891273	0.000186512	0.00011763
KEGG_PATHWAY	ccad05220:Chronic myeloid leukemia	44	0.614268	2.7453e-05	RB1, HDAC2, CDKN1B, CTBP1, SHC1, HDAC1, ARAF, PIK3CD, LOC122427080, PIK3R1, CBL, RELA, IKBKB, NRAS, AKT2, AKT3, AKT1, E2F2, E2F3, BAK1, IKBKG, HRAS, MAPK3, SMAD4, SMAD3, TGFB1, CHUK, TGFB3, GADD45A, BAD, GAB2, NFKB1, TGFBR2, RUNX1, NFKBIA, PIK3CA, CDK4, BAX, KRAS, RAF1, SOS1, TP53, CRK, LOC122441627	3140	83	10427	1.76037	0.00961705	0.000197214	0.000124379
KEGG_PATHWAY	ccad05162:Measles	74	1.03309	2.84147e-05	CDKN1B, TRADD, LOC122423465, PIK3CD, TNFAIP3, LOC122428193, CD3G, FASLG, CBLB, BBC3, IFIH1, IKBKB, CCND3, CASP8, CCND2, TBK1, AKT2, CASP3, AKT3, RACK1, AKT1, IKBKG, MAP3K7, JAK1, IFNAR2, CHUK, APAF1, CSNK2A2, TYK2, IRAK4, LOC122422848, PIK3CA, IRF3, CCNE1, TRAF6, CSNK2B, IRF7, TLR7, LOC122430141, CD46, TP53, TLR4, IFNAR1, LOC122441627, TLR2, LOC122430139, PIK3R1, IL2RG, RCHY1, RELA, MAPK8, IRAK1,…	3140	161	10427	1.52628	0.00995227	0.00020004	0.000126161
GOTERM_MF_DIRECT	GO:0005525~GTP binding	148	2.06617	3.02834e-05	RASL11B, RAB3D, RASL11A, ARHGAP35, RAB43, TUBB6, TUBB1, LOC122427624, RAB2A, ARL15, GTPBP6, GTPBP2, GTPBP1, EEF1A1, RAB32, RRAGA, RAB31, RRAGB, RAB37, RAB35, GUF1, RAB38, ARL8B, RABL6, RAB5B, RAB5C, SAR1A, ARL6, LOC122422199, LOC122424894, AGAP2, ARL1, ARL2, DNAJC27, GSPT2, GSPT1, RHOBTB2, RAP1B, RHOT2, CRACR2A, RAP1A, LOC122438655, LOC122430098, LOC122432032, PCK2, EEFSEC, LOC122428322, RAB4A, R…	5161	354	16442	1.33192	0.0466062	0.00596582	0.00591282
KEGG_PATHWAY	ccad05223:Non-small cell lung cancer	41	0.572386	3.22687e-05	RB1, ARAF, PIK3CD, TGFA, PIK3R1, STK4, FOXO3, FHIT, RASSF1, NRAS, RXRA, AKT2, RASSF5, KIF5A, AKT3, PLCG2, AKT1, E2F2, E2F3, BAK1, PLCG1, HRAS, MAPK3, PRKCG, PDPK1, GADD45A, BAD, PRKCB, HGF, STAT3, PRKCA, EML4, PIK3CA, CDK4, BAX, KRAS, RAF1, SOS1, MET, TP53, LOC122441627	3140	76	10427	1.79143	0.0112945	0.000222717	0.000140464
KEGG_PATHWAY	ccad04360:Axon guidance	85	1.18665	3.76367e-05	ITGB1, BMPR2, PIK3CD, RND1, PPP3CA, PPP3CB, PPP3CC, RGS3, DPYSL2, CFL1, RAC2, PLXNC1, RAC1, HRAS, EPHB4, NCK1, SEMA6B, ARHGEF12, TRPC6, TRPC3, PDPK1, LOC122454534, PRKCA, UNC5D, RHOA, PIK3CA, RAF1, MET, EPHA2, CAMK2D, SEMA7A, ROCK1, ROCK2, SRC, NTN4, GNAI3, CXCR4, PIK3R1, NTN1, GNAI1, NTN3, GNAI2, CDC42, EFNB1, PAK1, NRAS, PPP3R1, PARD6B, ABLIM2, PLCG2, PAK6, FYN, PLCG1, SLIT2, LRIG2, SRGAP3, LOC…	3140	192	10427	1.4701	0.013161	0.000254771	0.00016068
GOTERM_CC_DIRECT	GO:0005802~trans-Golgi network	38	0.530504	4.55212e-05	PI4K2B, SCOC, CCDC186, SYS1, SLC66A2, FURIN, PCSK7, PCSK4, TGOLN2, AP4M1, GGA1, ARL5B, CNST, CCDC91, ARL5A, ATP9B, PLEKHJ1, LOC122432783, YIPF4, M6PR, ATP11C, ATP11B, TRAPPC9, ATP11A, FAM91A1, TJAP1, IGF2R, RAB32, GOLPH3, RAB14, TRAPPC6B, DOP1A, YIPF6, RAB19, RAB38, RELCH, PHAF1, PI4K2A	4744	68	15361	1.80946	0.0332134	0.00480477	0.00477887
GOTERM_CC_DIRECT	GO:0005783~endoplasmic reticulum	131	1.82884	5.18034e-05	ANKLE2, GOLT1B, KDELR1, PLOD3, ZDHHC7, PLOD1, TMEM97, ZDHHC2, ZDHHC3, ZDHHC4, POFUT1, PIEZO1, PDIA3, RSAD2, ACSL1, SACM1L, SHISA5, P3H1, ATP11C, ATP11B, P3H4, CDKAL1, ACSL4, CNPY2, SHISA2, ATP11A, ACSL3, TEX2, DHDDS, PDIA4, TMX3, STIM1, STIM2, KDELR2, LOC122428697, LRPAP1, TMED10, NECAB3, TMTC3, ITPR2, LOC122420292, SGPL1, APH1B, PRDX4, SSR1, TXNDC5, EDEM3, HHATL, NDFIP2, NDFIP1, LOC122454316, WF…	4744	315	15361	1.34659	0.0377097	0.00480477	0.00477887
KEGG_PATHWAY	ccad03420:Nucleotide excision repair	36	0.502583	5.32761e-05	PCNA, LOC122454266, CETN2, POLD3, POLD4, POLR2A, POLR2B, POLD1, POLR2C, POLR2F, POLR2I, POLR2J, POLR2L, POLR2M, RFC5, RFC4, RFC1, LIG1, RPA1, RPA2, RAD23A, GTF2H1, GTF2H3, GTF2H4, GTF2H5, RBX1, DDB1, POLE4, CDK7, ERCC3, ERCC4, ERCC1, ERCC2, POLE3, ERCC8, CUL4B	3140	65	10427	1.83916	0.0185789	0.000353834	0.000223156
KEGG_PATHWAY	ccad04211:Longevity regulating pathway	46	0.642189	5.64782e-05	ATF2, PRKAA1, ATF6B, EHMT2, PRKAG1, PIK3CD, IRS2, PIK3R1, FOXO3, ADIPOR2, ADCY7, LOC122432714, FOXO1, RELA, IGF1R, RPTOR, NRAS, SESN3, ATG101, RB1CC1, AKT2, CREB3L2, AKT3, SESN2, EIF4EBP1, AKT1, PRKACA, EIF4E, HRAS, ATG5, TSC2, TSC1, SOD2, PRKAB1, NFKB1, ADCY9, RPS6KB1, PIK3CA, AKT1S1, BAX, KRAS, ULK1, EIF4E2, TP53, ATF4, CREB5	3140	90	10427	1.69725	0.0196846	0.000368154	0.000232188
KEGG_PATHWAY	ccad04810:Regulation of actin cytoskeleton	107	1.49379	6.61913e-05	CYFIP2, NCKAP1, CYFIP1, LOC122434313, ARAF, ARHGAP35, ACTB, LOC122435083, PPP1CC, AKT2, CFL1, AKT3, PIP4K2A, AKT1, PIP4K2C, PDGFRB, F2R, ACTN4, TIAM1, SPATA13, EZR, PFN1, RAF1, PXN, LPAR1, IQGAP1, PIK3R1, IQGAP2, SCIN, PDGFD, PIP5K1A, MYH11, NCKAP1L, PIP5K1C, LOC122426558, FGF23, LOC122426540, RDX, FN1, MSN, ARPC4, ARPC5, SSH2, SSH3, PTK2, DIAPH2, ARPC2, FGFR2, ITGB1, ITGAM, ARPC1B, ARPC1A, PIK3C…	3140	256	10427	1.38795	0.0230308	0.000423624	0.000267172
KEGG_PATHWAY	ccad04014:Ras signaling pathway	103	1.43794	6.98872e-05	ETS1, ELK1, ETS2, IGF1R, RASSF1, HTR7, SYNGAP1, TBK1, RASSF5, AKT2, AKT3, AKT1, PRKACA, PDGFRB, PRKCG, RALBP1, PRKCB, RALGAPA1, HGF, FLT3LG, PRKCA, LOC122430747, TIAM1, RAF1, EPHA2, LOC122431107, RAB5B, RAB5C, SHC1, TGFA, FOXO4, PLA2G5, PIK3R1, RASAL2, RASGRP2, PLA2G6, RASAL3, STK4, RASGRP1, PLD2, RAP1B, GNG10, RAP1A, PDGFD, PLCG2, ABL2, PLCG1, FGF23, NGFR, IGF2, NFKB1, GNB2, NF1, GNB4, REL, CALM…	3140	245	10427	1.39605	0.024301	0.000439291	0.000277053
GOTERM_MF_DIRECT	GO:0000976~transcription cis-regulatory region binding	19	0.265252	8.11372e-05	CREBZF, RNF10, GABPB2, ATMIN, ARID5B, ASH2L, AHR, GABPB1, LOC122424292, PER1, PER3, BASP1, TFAM, AHRR, ASB3, TAF2, MEN1, CDK5RAP2, ZBED3	5161	26	16442	2.3281	0.120039	0.014208	0.0140818
KEGG_PATHWAY	ccad05211:Renal cell carcinoma	40	0.558425	8.41079e-05	PRCC, ARAF, PIK3CD, TGFA, PIK3R1, HIF1A, ETS1, RAP1B, CDC42, FLCN, PAK1, NRAS, RAP1A, AKT2, AKT3, EP300, AKT1, PAK6, ELOB, RAC1, PAK3, PAK2, HRAS, MAPK3, PAK4, EGLN3, TGFB1, EGLN2, TGFB3, BAD, HGF, VEGFA, RBX1, PIK3CA, RAPGEF1, KRAS, RAF1, SOS1, MET, CRK	3140	76	10427	1.74774	0.0291732	0.000519403	0.000327578
KEGG_PATHWAY	ccad05321:Inflammatory bowel disease	37	0.516543	0.000100235	LOC122429367, LOC122429640, LOC122429860, RORC, LOC122429360, RORA, NOD2, IL2RG, LOC122429364, RELA, LOC122429361, TBX21, IL21R, STAT4, LOC122429902, STAT6, SMAD2, SMAD3, IL4R, TGFB1, LOC122429977, LOC122429976, TGFB3, STAT1, IFNGR1, IFNGR2, STAT3, NFATC1, FOXP3, NFKB1, MAF, LOC122429717, LOC122429978, TLR4, IL18R1, LOC122429718, TLR2	3140	69	10427	1.78067	0.0346693	0.000608324	0.000383659
GOTERM_MF_DIRECT	GO:0001227~DNA-binding transcription repressor activity, RNA polymerase II-specific	49	0.684071	0.000106388	ZNF891, ZNF572, ZNF175, LOC122421285, LOC122420593, PRDM1, ZFP82, LOC122420590, LOC122440485, ZNF81, LOC122420477, LOC122420279, ZNF605, LOC122420034, ZNF329, ZNF569, ZNF445, LOC122420636, ZFP1, FOXP4, FOXP3, LOC122425073, FOXP1, LOC122420589, LOC122432320, ZNF557, ZNF599, ZNF114, ZNF793, ZFP57, ZNF629, ZKSCAN7, LOC122440466, LOC122421102, LOC122420618, ZNF782, ZNF583, ZNF182, LOC122433554, ZNF34…	5161	96	16442	1.62609	0.154372	0.0167667	0.0166177
GOTERM_BP_DIRECT	GO:0000209~protein polyubiquitination	37	0.516543	0.000109863	PRKN, UBE2D4, FBXO28, PELI2, RNF19B, UBE3A, FBXO22, RNF114, UBR5, TRIM3, ARIH2, FBXO4, ARIH1, SHPRH, UBE2H, HACE1, ANKIB1, PPIL2, NHLRC3, LOC122432588, UBE2E3, UBE2E1, UBE4A, UBE2G1, UBE2A, TOPORS, RNF144A, RNF144B, RNF125, UBE2R2, MKRN1, MKRN2, ERCC8, NHLRC1, TRIP12, DZIP3, RNF166	5096	66	15999	1.76003	0.246001	0.0940796	0.0939697
KEGG_PATHWAY	ccad05017:Spinocerebellar ataxia	71	0.991205	0.000128139	RYR1, PIK3CD, ATP2A2, ATP2A1, RORA, VLDLR, RBPJ, PSMD8, PSMD6, PSMD7, LOC122420357, OPA1, RB1CC1, AKT2, PSMD2, AKT3, AKT1, PSMD1, CIC, MAP3K5, PRKCG, TRPC3, PRKCB, TWNK, WIPI1, PRKCA, TRAF2, WIPI2, ATG14, PSMA5, ERN1, ATXN2L, PSMA6, AFG3L2, PSMA4, PIK3CA, PSMA1, VDAC3, TBPL1, VDAC2, VDAC1, PIK3C3, ULK1, SLC25A5, PLCB2, SLC25A6, PSMD11, PSMD14, PSMD13, LOC122432993, PIK3R4, ITPR2, PIK3R1, PSMB7, M…	3140	159	10427	1.48283	0.0441054	0.00075962	0.000479078
KEGG_PATHWAY	ccad05206:MicroRNAs in cancer	75	1.04705	0.000129481	BMPR2, CDKN1B, LOC122434313, PIK3CD, IRS2, BMI1, GLS, RPTOR, IKBKB, RASSF1, CCND2, CASP3, STMN1, PIM1, EP300, HRAS, PRKCG, PDGFRB, ABCC1, PRKCB, TPM1, PRKCA, DICER1, RHOA, CDC25A, FOXP1, ZEB2, PIK3CA, CCNE1, DDIT4, ITGA5, EZR, RAF1, SOS1, MET, CRK, TP53, NOTCH2, LOC122430610, HDAC2, NOTCH1, SLC45A3, ROCK1, SHC1, HDAC1, NOTCH4, LOC122427080, PIK3R1, NRAS, SOCS1, PLCG2, E2F2, HMOX1, E2F3, BAK1, PLC…	3140	170	10427	1.46501	0.044557	0.00075962	0.000479078
KEGG_PATHWAY	ccad04062:Chemokine signaling pathway	82	1.14477	0.000149259	GSK3A, NCF1, LOC122426699, LOC122425049, LOC122425048, PIK3CD, LOC122428192, IKBKB, PREX1, AKT2, AKT3, RAC2, CCR9, AKT1, CCR8, IKBKG, RAC1, PRKACA, JAK2, CCR4, HRAS, CHUK, PRKCB, PRKCD, RHOA, FGR, TIAM1, ADCY9, PIK3CA, DOCK2, RAF1, SOS1, CRK, PLCB2, LOC122441627, LOC122428213, ROCK1, SHC1, ROCK2, SRC, PXN, GNAI3, WAS, CXCR4, CXCR6, PIK3R1, RASGRP2, FOXO3, ADCY7, GNAI1, RELA, PIK3R5, GNAI2, RAP1B,…	3140	190	10427	1.43314	0.0511866	0.000861299	0.000543206
KEGG_PATHWAY	ccad03083:Polycomb repressive complex	46	0.642189	0.000152526	HDAC2, L3MBTL3, L3MBTL2, USP16, UBE2D4, HDAC1, UBE2D2, UBE2D3, FOXK2, FOXK1, BMI1, YY1, SCML2, SCML1, YY2, RBBP4, WDR5, EP300, RBBP7, JARID2, E2F6, YAF2, FBRS, SKP1, SUZ12, CBX6, PHC2, USP7, PHC1, MBD6, KDM2A, AUTS2, SFMBT1, EED, TEX10, PCGF3, TFDP1, AEBP2, ASXL3, CSNK2B, ASXL2, LOC122431671, BCOR, BCORL1, OGT, BAP1	3140	93	10427	1.6425	0.0522773	0.000865955	0.000546142
KEGG_PATHWAY	ccad00030:Pentose phosphate pathway	20	0.279213	0.000167246	PRPS2, GPI, PRPS1, G6PD, GLYCTK, RPE, TALDO1, PGD, DERA, RPIA, SHPK, RGN, PGM2, IDNK, PGLS, ALDOA, TKT, PFKM, FBP1, RBKS	3140	30	10427	2.2138	0.0571759	0.000934454	0.000589343
KEGG_PATHWAY	ccad04670:Leukocyte transendothelial migration	58	0.809717	0.000170721	ITGB1, ITGAM, NCF1, LOC122434313, NCF4, PIK3CD, ITGAL, ARHGAP5, ARHGAP35, ACTB, RASSF5, RAC2, RAC1, PRKCG, ITGA4, PRKCB, LOC122454534, RHOH, PRKCA, ACTN4, RHOA, PIK3CA, CLDN12, PECAM1, EZR, RAPGEF3, RAPGEF4, ROCK1, ROCK2, TXK, LOC122435269, PXN, GNAI3, CXCR4, CD99L2, PIK3R1, GNAI1, GNAI2, RAP1B, CDC42, RAP1A, LOC122436632, PLCG2, PTK2B, LOC122420817, PLCG1, LOC122425824, JAM2, CD99, JAM3, MSN, MA…	3140	125	10427	1.54081	0.0583285	0.000938963	0.000592187
GOTERM_BP_DIRECT	GO:0006886~intracellular protein transport	80	1.11685	0.000184626	ARF3, ARF4, CLTC, CHM, SNX11, AP2A2, RIMS1, ARL5B, AP1G1, TMED3, AP1S2, AP1S1, ARFIP1, VPS35, AP3S2, SEC61B, AP1S3, ARL5A, WLS, VPS33A, VPS33B, COG3, STX7, SYTL1, FAM91A1, SYTL4, COPZ1, SYTL3, SYTL2, ARL4C, ARL4A, EXOC6, STX12, RAMP2, SEC23A, TMED10, SAR1A, UNC93B1, STX16, ARL6, COPB1, TGFBRAP1, USO1, STX18, STXBP2, LOC122424894, ARL1, VPS26B, STX11, NAPG, GGA1, SCFD1, SNX27, SCFD2, VPS11, STX6, …	5096	176	15999	1.42706	0.377824	0.118576	0.118438
GOTERM_CC_DIRECT	GO:0000785~chromatin	43	0.600307	0.000188472	RB1, KDM3A, KDM3B, SET, JMJD1C, CHD4, HR, CHD2, PDS5A, NSD3, HMGN4, HMGN5, SIN3B, SIN3A, MED10, NSD1, NSD2, HMGN3, TRIM45, MEN1, TSPYL2, AKIRIN2, BRD2, TSPYL1, LOC122426643, ESCO1, LOC122421330, HMGA1, NAP1L3, NAP1L1, ESCO2, LOC122445262, SMARCA1, PML, NAP1L4, RBL2, STAG1, STAG2, MIS18A, RBL1, LOC122425754, TSPYL4, TRIM56	4744	84	15361	1.65754	0.13052	0.0155385	0.0154547
KEGG_PATHWAY	ccad05205:Proteoglycans in cancer	95	1.32626	0.000201137	ITGB1, LOC122425560, WNT2B, LOC122434313, ARAF, PIK3CD, FASLG, CTSV, ELK1, ACTB, IGF1R, PPP1CC, AKT2, CASP3, AKT3, AKT1, ITGAV, RAC1, PRKACA, HRAS, PRKCG, ARHGEF12, PPP1R12A, PDPK1, PRKCB, ITGA2, HGF, RPS6, PLAUR, FRS2, PRKCA, ANK1, HSPG2, RHOA, TIAM1, PIK3CA, ARHGEF1, ITGA5, EZR, RAF1, SOS1, MET, TP53, TLR4, TLR2, CD63, CAMK2D, ROCK1, SDC4, ROCK2, SRC, PXN, TWIST2, WNT8B, ITPR2, LOC122427080, IQ…	3140	228	10427	1.38363	0.0683585	0.00108923	0.000686959
KEGG_PATHWAY	ccad04142:Lysosome	64	0.89348	0.000209573	SCARB2, LOC122427221, CLTC, LOC122454606, LOC122454605, CTSW, TCIRG1, CTSV, NAGPA, LITAF, SGSH, AP4M1, CTSO, GNPTAB, HYAL1, AP1G1, SMPD1, HYAL2, LAMP2, AP1S2, CTSH, AP1S1, IDS, WDR7, AP3S2, CTSF, AP1S3, GUSB, CTSD, CTSC, HGSNAT, ARSA, ATP6AP1, ENTPD4, SLC11A1, SUMF1, PLA2G15, NPC1, NPC2, NCOA7, ATP6V0C, CD63, ASAH1, IDUA, GNS, CLN3, GGA1, ATP6V0A2, AP4S1, AGA, ARSB, NAPSA, M6PR, LAPTM5, LOC122425…	3140	142	10427	1.49665	0.0711215	0.00111772	0.000704926
KEGG_PATHWAY	ccad04012:ErbB signaling pathway	43	0.600307	0.000266169	CAMK2D, CDKN1B, SHC1, SRC, ARAF, PIK3CD, TGFA, CBLB, PIK3R1, CBL, ELK1, AREG, PAK1, NRAS, MAPK8, AKT2, AKT3, PLCG2, EIF4EBP1, AKT1, ABL2, PAK6, PLCG1, PAK3, PAK2, HRAS, MAPK3, PAK4, NCK1, PRKCG, BAD, PRKCB, LOC122428005, PRKCA, NRG1, PTK2, RPS6KB1, PIK3CA, KRAS, RAF1, SOS1, CRK, LOC122441627	3140	87	10427	1.64127	0.0894477	0.00139838	0.000881933
KEGG_PATHWAY	ccad00562:Inositol phosphate metabolism	37	0.516543	0.000303386	IPPK, PI4K2B, MTMR1, INPP1, MTMR14, PIK3CD, MTMR6, PIK3C2B, MTMR7, MTM1, INPP5F, IMPA2, PLCG2, PIP4K2A, PIP5K1A, PIP4K2C, PLCG1, PIP5K1C, CDIPT, MIOX, TPI1, SACM1L, IPMK, ITPK1, FIG4, ITPKC, MINPP1, PIKFYVE, ALDH6A1, PIK3CA, PI4KA, PIK3C3, PLCH2, PLCD4, PLCB2, PLCD1, PI4K2A	3140	72	10427	1.70647	0.101302	0.00157047	0.000990466
GOTERM_MF_DIRECT	GO:0003677~DNA binding	165	2.3035	0.000346834	MPG, ZNF292, ZFAND6, PDCD5, ZFAND5, TIAL1, RABGEF1, EME2, GPBP1, SPATA24, SMARCAD1, ADNP2, ZNF326, LOC122440602, BANF1, LOC122423820, ARID2, TMPO, ZBP1, LOC122422040, KDM2A, LIG1, SP110, LIG4, WRNIP1, LOC122429192, DICER1, WDR76, KAT6B, KAT6A, SUB1, TBPL1, LOC122424467, LOC122454452, LOC122430016, RTEL1, TSHZ3, LOC122430012, LOC122430011, SP140, KMT2B, LOC122425345, TSHZ2, BAZ2A, RTF1, BAZ2B, RLF…	5161	418	16442	1.25756	0.421146	0.0496918	0.0492504
GOTERM_BP_DIRECT	GO:0010468~regulation of gene expression	37	0.516543	0.000355168	USP16, LOC122454842, ATXN7L3B, YBX1, AFF3, TOB2, CRIP1, YBX3, AFF4, LOC122428174, NKAPL, AFF1, NIPBL, ZNF827, RBBP4, HNRNPDL, ZNF507, ZNF407, NFKBIZ, PCBP2, ADNP2, DROSHA, HMG20A, LOC122423425, RBBP7, KDM6A, TCF19, ZNF462, ZNF142, LOC122435776, LOC122428082, CDK4, ZFP64, HNRNPD, ZNF335, ANKRA2, NFKBID	5096	69	15999	1.68351	0.598659	0.182485	0.182272
GOTERM_MF_DIRECT	GO:0003723~RNA binding	223	3.11322	0.000390515	RPL4, RAMAC, RPL3, LOC122423662, THUMPD3, THUMPD1, RPL7, RPS16, RPS19, SNRPD2, RPS18, LOC122441772, LOC122420398, GPBP1, HABP4, SNRPD3, RPL37, RPS10, SEC63, DDX17, ABT1, SCAF11, WDR75, DICER1, SND1, SRRM1, DHX40, XRN1, DDX39B, XRN2, EIF1B, LOC122429783, EIF5A2, SNU13, AKAP17A, HTATSF1, DHX33, PDCD11, DHX34, DHX38, TRMT1L, RBM10, MCTS1, PNO1, SETD1A, MEX3C, MRPL21, MEX3B, AGO4, AGO2, HNRNPD, RNPS1…	5161	586	16442	1.21235	0.459668	0.0502184	0.0497723
GOTERM_MF_DIRECT	GO:0003697~single-stranded DNA binding	29	0.404858	0.000414238	MCM7, MCM8, MCM9, MCM10, NUCKS1, SMC6, RAD51AP1, PCBP1, HMCES, PCBP2, TWNK, APTX, TSN, POLA1, RAD51D, TEN1, ERCC4, ERCC1, TDP1, SPRTN, MCM3, NUP35, MCM5, SSBP1, MCM6, SSBP3, RAD18, LOC122434183, MCM2	5161	51	16442	1.81154	0.479505	0.0502184	0.0497723
GOTERM_MF_DIRECT	GO:0005096~GTPase activator activity	60	0.837638	0.000540507	DOCK5, LOC122429801, LOC122427820, FLCN, ARHGAP42, OPHN1, LOC122436499, TBC1D22A, AGFG2, RGS6, AGFG1, RALBP1, ARHGEF12, RASA4B, RALGAPA1, ELMOD2, STARD8, PLEKHG6, ARAP2, TSC2, ARFGAP3, ACAP2, TBC1D20, TBC1D5, RP2, TBC1D25, SMCR8, DOCK2, SEC23A, RGS14, AGAP2, ASAP3, ARHGAP18, ARHGAP17, IQGAP1, IQGAP2, ARHGAP20, SH3BP1, CHN2, TBC1D13, STXBP5, ECT2, SRGAP1, SEC23B, RAP1GAP2, RANBP2, RANBP1, TBCD, LO…	5161	130	16442	1.47038	0.573469	0.0608457	0.0603051
KEGG_PATHWAY	ccad04070:Phosphatidylinositol signaling system	47	0.65615	0.000550584	CDS1, IPPK, PI4K2B, MTMR1, INPP1, MTMR14, DGKA, PIK3CD, ITPR2, PIK3R1, MTMR6, PIK3C2B, MTMR7, MTM1, LOC122420753, PPIP5K1, INPP5F, IMPA2, PLCG2, PIP4K2A, PIP5K1A, PIP4K2C, PLCG1, PIP5K1C, IP6K1, CDIPT, IP6K2, PRKCG, PRKCB, SACM1L, IPMK, ITPK1, PRKCA, ITPKC, PIKFYVE, LOC122445547, PIK3CA, DGKQ, PI4KA, CALM3, PIK3C3, PLCD4, PLCB2, CALM2, PLCD1, PI4K2A, CDS2	3140	100	10427	1.56073	0.176226	0.00277346	0.00174917
KEGG_PATHWAY	ccad03030:DNA replication	23	0.321095	0.000551541	RFC5, PRIM2, RNASEH2C, PCNA, RFC4, MCM7, RFC1, LIG1, RPA1, RPA2, POLD3, POLE4, POLA1, POLD4, RNASEH1, POLD1, POLE3, MCM3, MCM5, SSBP1, DNA2, MCM6, MCM2	3140	39	10427	1.95836	0.176504	0.00277346	0.00174917
KEGG_PATHWAY	ccad00531:Glycosaminoglycan degradation	15	0.209409	0.000581757	HGSNAT, IDUA, LOC122454606, LOC122454605, LOC122425091, GNS, SGSH, GALNS, HYAL1, GLB1, HYAL2, IDS, HPSE, GUSB, ARSB	3140	21	10427	2.37193	0.185221	0.00288245	0.00181791
KEGG_PATHWAY	ccad04611:Platelet activation	58	0.809717	0.000589593	ITGB1, SNAP23, PIK3CD, ARHGAP35, ACTB, PPP1CC, AKT2, AKT3, AKT1, PRKACA, PTGIR, ARHGEF12, PPP1R12A, VWF, SYK, ITGA2, F2R, LOC122454534, PLA2G4A, RHOA, ADCY9, PIK3CA, STIM1, BTK, ARHGEF1, LCP2, TLN1, PLCB2, ROCK1, ROCK2, SRC, GNAI3, ITPR2, PIK3R1, LOC122454307, RASGRP2, RASGRP1, ADCY7, GNAI1, PIK3R5, PTGS1, GNAI2, RAP1B, GNA13, RAP1A, TBXA2R, P2RY1, PLCG2, FYN, LOC122425824, MAPK3, P2RY12, LYN, MA…	3140	130	10427	1.48154	0.187466	0.00288245	0.00181791
KEGG_PATHWAY	ccad05022:Pathways of neurodegeneration - multiple diseases	207	2.88985	0.000620653	ARAF, ZFYVE1, UBE2L3, PSMD8, PSMD6, TBK1, PSMD7, PSMD2, PSMD1, PRKCG, PRKCB, CSNK2A2, PRKCA, ATG14, LOC122435630, CSNK2B, VDAC3, LOC122434662, VDAC2, LOC122421476, ULK1, LOC122455265, VDAC1, LOC122421478, UBA52, OPTN, ATF4, PIK3R4, C9ORF72, UBE2J1, PPP3R1, LOC122430098, PLCG1, FADD, SPTBN2, TRAP1, WNT10A, XBP1, FZD5, LOC122422583, FZD7, FZD9, EIF2AK3, GRIN2D, CALM3, CALM2, LOC122423437, RYR1, LOC…	3140	567	10427	1.21232	0.196307	0.00299274	0.00188746
KEGG_PATHWAY	ccad05330:Allograft rejection	27	0.376937	0.000644555	CD86, LOC122429686, LOC122429367, LOC122429640, LOC122429860, LOC122429603, LOC122429624, CD80, PRF1, LOC122429360, FASLG, LOC122429364, LOC122429361, LOC122455090, LOC122429902, LOC122455194, LOC122429977, LOC122429976, LOC122429593, LOC122429691, CD40LG, CD28, LOC122429717, FAS, LOC122455089, LOC122429978, LOC122429718	3140	49	10427	1.82977	0.203045	0.00306599	0.00193367
KEGG_PATHWAY	ccad00640:Propanoate metabolism	22	0.307134	0.000657743	BCKDHA, LOC122430777, ACSS3, BCKDHB, LOC122433908, LOC122430778, LDHB, MCEE, ALDH6A1, SUCLA2, PCCA, EHHADH, DBT, PCCB, ECHDC1, SUCLG2, SUCLG1, MLYCD, ACOX3, MMUT, LOC122422755, HIBCH	3140	37	10427	1.97447	0.206738	0.00308701	0.00194692
KEGG_PATHWAY	ccad04110:Cell cycle	75	1.04705	0.000688274	CDKN1C, RB1, CDKN1B, MCM7, YWHAB, CDC14A, CDC14B, NIPBL, CCND3, CCND2, PTTG1, PPP2R1A, CDC26, CDC27, EP300, FBXO5, SKP2, SKP1, ESCO1, PPP2R5B, PPP2R5A, PPP2R5C, ESCO2, SMC1A, YWHAZ, CDC25A, RBX1, CCNA2, RBL2, TFDP1, RBL1, TFDP2, ESPL1, CCNE1, MCM3, ANAPC4, MCM5, MCM6, TP53, MCM2, LOC122430610, HDAC2, PCNA, HDAC1, LOC122427080, PDS5A, ORC5, CCNB3, CCNB1, ORC6, ORC3, ORC2, E2F2, E2F3, BUB3, E2F4, S…	3140	178	10427	1.39917	0.215223	0.0031878	0.00201048
GOTERM_CC_DIRECT	GO:0032040~small-subunit processome	24	0.335055	0.000694796	NOP56, UTP25, NOP58, WDR36, NOP14, UTP11, KRR1, IMP3, UTP3, WDR3, NGDN, IMP4, SNU13, PWP2, NOL6, RRP9, FBL, TBL3, EMG1, PDCD11, MPHOSPH10, UTP20, NOL10, UTP14A	4744	41	15361	1.89541	0.402928	0.0515539	0.0512759
GOTERM_BP_DIRECT	GO:0006260~DNA replication	24	0.335055	0.000703075	GINS2, STN1, RTEL1, MCM7, RFC1, RPA1, RPA2, MCM10, LOC122435778, LOC122429463, TICRR, RECQL4, POLD3, ORC5, POLA1, KIN, WRN, ORC6, ORC3, ORC2, MCM3, MCM5, TOP1, MCM2	5096	40	15999	1.88371	0.835943	0.301033	0.300682
GOTERM_BP_DIRECT	GO:0006888~endoplasmic reticulum to Golgi vesicle-mediated transport	44	0.614268	0.000853053	SEC23A, TMED10, GOLT1B, SAR1A, KDELR1, COPB1, USO1, GOSR1, MIA2, TEX261, IER3IP1, LMAN1, SCFD1, TFG, TMED3, STX5, WHAMM, YKT6, SEC23B, TRAPPC2, BCAP31, TRAPPC3, SEC24B, TRAPPC1, TRAPPC2L, LMAN1L, YIPF4, TRAPPC8, NRBP1, ARCN1, YIF1B, TBC1D20, TRAPPC6B, YIPF6, KDELR2, MPPE1, COPG1, SEC24D, SEC22B, ERGIC2, SEC22A, SEC24C, ERGIC1, SEC22C	5096	89	15999	1.55212	0.88845	0.31307	0.312705
KEGG_PATHWAY	ccad05225:Hepatocellular carcinoma	76	1.06101	0.000859914	RB1, WNT2B, ARAF, PIK3CD, ELK1, ACTB, IGF1R, AKT2, AKT3, AKT1, ARID2, HRAS, PRKCG, PBRM1, SMARCC1, SMARCC2, PRKCB, HGF, PRKCA, ARID1A, TGFBR2, PIK3CA, LOC122429517, LOC122431193, RAF1, SOS1, MET, TP53, LOC122431348, SMARCD1, SMARCD2, SHC1, TCF7, LEF1, MGST1, WNT8B, TGFA, PIK3R1, LRP6, NRAS, LOC122455070, PLCG2, E2F2, HMOX1, E2F3, BAK1, PLCG1, BRD7, MAPK3, WNT4, SMARCE1, SMAD2, TCF7L2, WNT10A, SMA…	3140	182	10427	1.38667	0.261268	0.00393104	0.00247923
KEGG_PATHWAY	ccad05231:Choline metabolism in cancer	47	0.65615	0.000933792	SLC22A5, SLC44A1, SLC44A2, DGKA, WAS, PIK3CD, PIK3R1, HIF1A, PLD2, NRAS, MAPK8, AKT2, PDGFD, AKT3, RAC2, EIF4EBP1, PIP5K1A, AKT1, PLCG1, RAC1, PIP5K1C, WASF2, HRAS, MAPK3, PRKCG, PDGFRB, LYPLA1, CHKB, PCYT1A, CHKA, PDPK1, PRKCB, PLA2G4A, TSC2, PRKCA, TSC1, LOC122435493, RPS6KB1, PIK3CA, SP1, DGKQ, KRAS, CHPT1, RAF1, SOS1, PLPP3, PLPP1	3140	102	10427	1.53013	0.280248	0.00421403	0.00265771
KEGG_PATHWAY	ccad04919:Thyroid hormone signaling pathway	55	0.767835	0.000984988	PIK3CD, ATP2A2, ATP2A1, ACTB, MED17, MED12, MED14, MED13, SIN3A, AKT2, AKT3, EP300, AKT1, ITGAV, PRKACA, HRAS, PRKCG, NCOA2, PDPK1, PRKCB, NCOA3, TSC2, PRKCA, KAT2B, PIK3CA, TBC1D4, RAF1, PLCB2, TP53, NOTCH2, PFKFB2, HDAC2, NOTCH1, HDAC1, SRC, NOTCH4, LOC122427080, PIK3R1, HIF1A, FOXO1, NRAS, RXRA, PLCG2, PLCG1, MAPK3, WNT4, STAT1, BAD, SLC16A10, RCAN2, CTNNB1, KRAS, PLCD4, PFKM, PLCD1	3140	124	10427	1.47289	0.293115	0.00438881	0.00276794
GOTERM_BP_DIRECT	GO:0006511~ubiquitin-dependent protein catabolic process	57	0.795756	0.000991516	RNF13, UBE2D4, UBE2D2, UBE2D3, RNF19B, UBE3A, HERPUD1, HERC5, HERC4, UCHL1, RNF114, ARIH2, LOC122429726, ARIH1, RNF111, UBL7, FBXO11, KCTD6, RBX1, RNF144A, RNF144B, RNF167, PSMA6, PSMA4, RNF125, UBE2R2, PSMA1, LOC122431671, CACUL1, RNF166, PRKN, CUL7, PSMD11, PSMD13, CUL3, NEDD4L, RCHY1, RNF5, RNF213, UBQLN4, UBE2H, NDFIP2, NDFIP1, ANKIB1, SMURF2, AMFR, WWP1, WWP2, NTAN1, RNF146, ITCH, NPLOC4, NE…	5096	123	15999	1.4549	0.921876	0.318401	0.318029
GOTERM_MF_DIRECT	GO:0016887~ATP hydrolysis activity	111	1.54963	0.00105188	ATP8A1, SMC2, LOC122447237, RUVBL1, LOC122447238, LONP2, MORC3, MORC4, TAP2, TAP1, ATP11C, ATP11B, WRNIP1, ATP11A, CLPX, LOC122447240, AFG3L2, YME1L1, ABCG2, ATP6V1A, LOC122430139, ABCB6, ABCB7, FIGNL2, NTPCR, HSP90B1, SPAST, RNF213, NLRP2, LOC122435267, MDN1, ABCA1, TRAP1, ATP8B4, ATP8B1, ABCA3, HSPA6, LOC122447588, TOR1B, SMARCA1, CCT6A, SRPRA, ABCD3, HSP90AB1, MCM7, MCM8, NVL, MCM9, LOC1224234…	5161	273	16442	1.29533	0.809601	0.110517	0.109535
GOTERM_CC_DIRECT	GO:0005813~centrosome	63	0.87952	0.0010533	NUMA1, CETN2, CEP19, CEP120, CDC14A, CDC14B, PCM1, ZFYVE26, TBC1D31, RTTN, IFT57, CCDC38, OFD1, ARHGEF10, CEP295, HAUS3, IFT80, TTI2, HAUS2, DYNC1LI1, RAD51D, DYNC1LI2, POC5, ESPL1, CCNE1, NME7, TRIM59, CEP20, CCNO, SDCCAG8, AKNA, DCTN2, ROCK2, TUBGCP2, SSNA1, CEP85L, CCNB3, IFT74, PPP2R3C, CCDC77, PLK3, NEK9, RANBP1, BBS1, NPM1, ODF2, CEP350, CEP152, NDE1, PLK2, CCDC15, HOOK3, CCDC88B, HOOK1, CC…	4744	143	15361	1.42652	0.54249	0.0710495	0.0706665
GOTERM_MF_DIRECT	GO:0043130~ubiquitin binding	32	0.44674	0.00119975	OTUB2, ILRUN, TSG101, UBXN2B, GGA1, SHARPIN, UBR5, TOM1, SMARCAD1, MARCHF7, LOC122433440, BUB3, RAE1, N4BP2, LOC122435819, AMFR, RAD23A, UEVLD, TOM1L1, TOM1L2, NSFL1C, NPLOC4, UBXN10, NBR1, CKS2, UBAP1, TAB3, PLAA, TAB2, RBCK1, STAM2, OTUB1	5161	61	16442	1.67125	0.849222	0.118176	0.117126
KEGG_PATHWAY	ccad04213:Longevity regulating pathway - multiple species	33	0.460701	0.00125832	HDAC2, PRKAA1, LOC122430139, HDAC1, LOC122423465, PRKAG1, PIK3CD, LOC122428193, IRS2, PIK3R1, FOXO3, ADCY7, LOC122432714, FOXO1, IGF1R, RPTOR, NRAS, AKT2, AKT3, AKT1, PRKACA, HRAS, ATG5, HSPA6, SOD2, PRKAB1, SOD1, ADCY9, RPS6KB1, PIK3CA, AKT1S1, KRAS, LOC122430141	3140	66	10427	1.66035	0.358025	0.00553659	0.00349183
GOTERM_BP_DIRECT	GO:0000226~microtubule cytoskeleton organization	41	0.572386	0.00135185	CDC14A, SPATA7, CDC14B, TUBB6, TUBA1B, NUAK1, NUAK2, PPP2R3C, MAP2, TUBB1, MAP7, TOGARAM1, LOC122430098, LOC122421324, MAP4, LOC122422899, MARK2, LOC122426544, TUBB, TBCD, TUBE1, TUBB4B, EML3, EML4, DYNC1LI1, DYNC1LI2, SNRK, TTLL5, TTLL4, MAP7D3, CCDC8, TTLL1, MAP7D2, SIK3, CCDC170, TSSK6, SIK1, TTLL11, SIK2, TSSK4, TTLL9	5096	83	15999	1.55085	0.969088	0.385879	0.385429
GOTERM_MF_DIRECT	GO:0008270~zinc ion binding	236	3.29471	0.00144945	PGLYRP4, CDA, TES, EHMT2, LOC122454842, RABGEF1, HERC2, TRIM28, ZMIZ1, CHORDC1, LOC122423425, TRIM27, TRIM21, PRKCG, PRKCB, CLPX, AFG3L2, NEIL2, CDIP1, TRIM14, TRIM10, TRIM11, SF1, ZNF276, L3MBTL3, L3MBTL2, LOC122454266, SHMT2, SUPT4H1, GATA6, GATA2, MEFV, ADH5, MBTD1, RNF216, ERI2, HLTF, LOC122424777, LTA4H, VAT1, PHC2, LOC122450353, PHC1, SETDB1, SIAH2, SIAH1, TRIP4, NR1D2, NR2F6, TADA2B, APOBE…	5161	637	16442	1.1803	0.898327	0.134373	0.133179
KEGG_PATHWAY	ccad04148:Efferocytosis	71	0.991205	0.00154866	ATP8A1, ATP2A2, ATP2A1, DUSP16, PANX1, GPR132, CASP7, CASP3, SIRPA, ITGAV, RAC1, JAK2, CPT1A, ARG1, VPS33A, ATP11C, ADAM10, TIMD4, ATP11B, ANO6, ATP11A, CPT1C, DUSP7, PLA2G15, ADAM17, LOC122448418, PECAM1, ADAM9, CD47, RAB7B, SGK1, MFGE8, CRK, RAB7A, PPARD, PTGER4, C1QB, CEBPB, CAMK2D, RAB5B, RAB5C, LRP1, ODC1, TGFBRAP1, LOC122448423, PLA2G6, HIF1A, AGER, P2RY6, RXRA, ALOX5, VPS11, S1PR1, MAPK3, …	3140	171	10427	1.37877	0.420478	0.00672999	0.00424448
KEGG_PATHWAY	ccad04910:Insulin signaling pathway	67	0.935362	0.00165187	LOC122425560, PYGB, PDE3B, PRKAG1, ARAF, PIK3CD, IRS2, CBLB, ELK1, RPTOR, IKBKB, LIPE, PPP1CC, GYS1, LOC122420753, AKT2, AKT3, FLOT1, AKT1, PRKACA, HRAS, SREBF1, PDPK1, RPS6, TSC2, PHKA1, TSC1, PRKAB1, PHKA2, LOC122445547, PIK3CA, PRKAR1A, PPP1R3B, PPP1R3D, RAPGEF1, RAF1, SOS1, EIF4E2, CRK, FBP1, RHOQ, PRKAA1, SHC1, PIK3R1, CBL, LOC122432714, FOXO1, SOCS2, SOCS3, NRAS, MAPK8, SOCS1, PRKAR2A, EIF4…	3140	160	10427	1.39054	0.441186	0.00709094	0.00447213
GOTERM_MF_DIRECT	GO:0004842~ubiquitin-protein transferase activity	30	0.418819	0.00166783	WDSUB1, TNFAIP1, KLHL13, RNF135, HERC3, RNF213, SHARPIN, HERC1, UBR5, MARCHF9, TRIM45, HERC6, RSPRY1, HACE1, NSMCE1, MUL1, TRAF2, PEX12, PML, MIB1, KLHL9, RNF123, RNF169, TTC3, KCTD13, RBCK1, RNF141, LNX2, TRIM56, OBI1	5161	57	16442	1.67675	0.927972	0.146028	0.144731
GOTERM_BP_DIRECT	GO:0007265~Ras protein signal transduction	21	0.293173	0.00172448	USP8, RALB, RASGRF1, RASGRP2, RASGRP1, RASSF1, RIT1, NRAS, RASGEF1A, RASGEF1B, RAPGEF1, KRAS, MAPKAPK5, SOS1, RAPGEF6, RGL2, HRAS, RAPGEF3, RAPGEF4, ERAS, RALGPS2	5096	35	15999	1.88371	0.988154	0.443019	0.442502
KEGG_PATHWAY	ccad05416:Viral myocarditis	39	0.544465	0.00179106	CD86, LOC122429686, LOC122429367, LOC122429640, LOC122429860, LOC122429603, LOC122429624, CD80, PRF1, LOC122429360, ITGAL, LOC122429364, ACTB, LOC122429361, SGCE, CASP8, SGCB, CASP3, DAG1, RAC2, ABL2, LOC122429902, DMD, FYN, RAC1, CD55, LOC122429977, LOC122429976, CAV1, LOC122429593, LOC122429691, CD40LG, CD28, LOC122429717, SSPN, LOC122429978, SNTB1, EIF4G2, LOC122429718	3140	83	10427	1.56033	0.46795	0.00759581	0.00479054
KEGG_PATHWAY	ccad04931:Insulin resistance	50	0.698032	0.00184143	PYGB, SLC27A1, PRKAG1, PIK3CD, IRS2, IKBKB, PPP1CC, RPS6KA3, GYS1, RPS6KA6, AKT2, RPS6KA2, RPS6KA1, AKT3, CREB3L2, AKT1, SREBF1, CPT1A, PDPK1, PRKCB, PRKCD, PRKAB1, TNFRSF1A, PIK3CA, TBC1D4, PPP1R3B, PPP1R3D, TRIB3, PRKCQ, SLC27A4, CREB5, PRKAA1, PIK3R1, FOXO1, RELA, PTPA, SOCS3, MAPK8, PCK2, PTPN1, NR1H2, STAT3, GFPT1, OGA, NR1H3, NFKB1, NFKBIA, MLXIPL, RPS6KB1, OGT	3140	113	10427	1.46934	0.477318	0.00771647	0.00486664
GOTERM_MF_DIRECT	GO:0004672~protein kinase activity	56	0.781795	0.00196675	SCYL3, TRIO, PRAG1, LRRK2, LRRK1, ARAF, SPEG, NEK2, MAP3K8, SCYL2, SCYL1, CDKL5, RIPK3, STRADA, STRADB, LMTK3, LMTK2, CASK, TEX14, KSR2, NRBP1, BMP2K, TRIB3, TNIK, TRIB1, RAF1, STK40, GUCY2C, PXK, NPR2, IRAK1, IRAK2, STK36, MAP3K20, CDK17, SRPK2, MAP3K2, SRPK3, NEK9, MAP3K1, MLKL, NEK4, RYK, EIF2AK1, NEK6, EIF2AK3, EIF2AK2, DCLK1, CLK3, SRPK1, TBCK, PAN3, TAOK3, STK26, POMK, CDK16	5161	125	16442	1.42725	0.95507	0.159097	0.157684
GOTERM_MF_DIRECT	GO:0019888~protein phosphatase regulator activity	14	0.195449	0.002019	PPP1R16B, PPP1R15A, PPP1R15B, LOC122434723, LOC122429249, PPP2R2A, PPP4R1, PPP1R3B, PPP2R1A, PPP6R1, PPP6R2, PPP4R4, PPP6R3, LOC122454175	5161	20	16442	2.23007	0.958629	0.159097	0.157684
KEGG_PATHWAY	ccad01521:EGFR tyrosine kinase inhibitor resistance	44	0.614268	0.00203903	LOC122425560, SHC1, SRC, ARAF, PIK3CD, TGFA, PIK3R1, FOXO3, IGF1R, NRAS, AKT2, PDGFD, AKT3, PLCG2, EIF4EBP1, AKT1, PLCG1, JAK2, EIF4E, IL6R, HRAS, MAPK3, JAK1, PRKCG, PDGFRB, BAD, PRKCB, HGF, STAT3, RPS6, PRKCA, NRG1, VEGFA, RPS6KB1, PIK3CA, BCL2, NF1, BAX, KRAS, EIF4E2, RAF1, SOS1, MET, FGFR2	3140	97	10427	1.5063	0.512503	0.00844398	0.00532547
KEGG_PATHWAY	ccad04146:Peroxisome	41	0.572386	0.00210954	ABCD3, ECI2, PRDX5, SCP2, PRDX1, NUDT19, LOC122428934, MLYCD, ACAA1, DECR2, ABCD1, HAO2, NUDT13, PEX16, PHYH, LOC122431993, NOS2, ACSL1, IDH1, EPHX2, ECH1, IDH2, PEX10, ACSL4, ACSL3, SOD2, PEX12, PEX14, SOD1, PEX7, NUDT7, SLC25A17, AMACR, ACOX2, PEX3, PEX6, EHHADH, AGPS, FAR1, ACOX3, FAR2	3140	89	10427	1.52976	0.524478	0.00863439	0.00544555
KEGG_PATHWAY	ccad03410:Base excision repair	28	0.390898	0.00234426	LOC122424372, PARG, PCNA, MPG, OGG1, UNG, POLD3, POLB, POLD4, POLD1, TDG, POLL, POLG, RFC5, MBD4, PARP3, RFC4, PARP1, RFC1, LIG1, PARP2, XRCC1, APTX, SMUG1, POLE4, NEIL2, TDP1, POLE3	3140	55	10427	1.69054	0.562268	0.00948483	0.00598191
KEGG_PATHWAY	ccad04510:Focal adhesion	83	1.15873	0.00237164	ITGB1, RASGRF1, PIK3CD, ARHGAP5, ELK1, ARHGAP35, ACTB, IGF1R, PPP1CC, CCND3, CCND2, AKT2, AKT3, RAC2, AKT1, ITGB7, ITGAV, RAC1, HRAS, PRKCG, PDGFRB, PPP1R12A, VWF, ITGA4, PDPK1, PRKCB, ITGA2, HGF, LOC122454534, ITGA1, EMP1, PRKCA, ACTN4, RHOA, PIK3CA, COL4A1, COL4A3, RAPGEF1, ITGA7, ITGA6, ITGA5, TLN1, RAF1, SOS1, MET, CRK, BIRC3, ITGA9, ROCK1, SHC1, ROCK2, SRC, PXN, LAMA3, PIK3R1, RAP1B, CDC42, …	3140	208	10427	1.32509	0.566476	0.00948655	0.005983
GOTERM_BP_DIRECT	GO:0033554~cellular response to stress	10	0.139606	0.0026948	MAP3K15, PRDX4, PRDX1, REL, MAP3K6, RELA, NFKB1, MAP3K5, NFKB2, RELB	5096	12	15999	2.61627	0.999027	0.577912	0.577238
GOTERM_BP_DIRECT	GO:0035556~intracellular signal transduction	100	1.39606	0.00269947	DGKA, ITSN1, RPS6KA3, PREX1, RPS6KA2, RPS6KA1, RGS9, RGS6, WSB1, CISH, DAPK1, PASK, NRBP1, KCTD9, DEPDC1B, ADCY9, MAPKAPK3, DGKQ, SPATA13, SIK3, BTK, TSSK6, SIK1, PRKCQ, SIK2, TSSK4, SHC1, NPR2, STK4, PLD2, SOCS2, SOCS3, NUAK1, NUAK2, SOCS1, IRAK1, IRAK2, STK38, STK38L, ECT2, SOCS6, SOCS7, MARK3, MARK2, PAG1, SOCS5, BMX, DCLK1, NET1, WNK1, WNK2, MAST4, CAB39L, TLK2, TLK1, JAK2, JAK1, RASA4B, SYK,…	5096	245	15999	1.28144	0.999039	0.577912	0.577238
KEGG_PATHWAY	ccad03015:mRNA surveillance pathway	50	0.698032	0.00285576	HBS1L, SMG1, NXT1, LOC122429249, PPP2R2A, SMG7, SMG5, PPP1CC, PNN, PPP2R1A, PCF11, PAPOLG, PAPOLA, PELO, UPF1, LOC122423495, PABPC4, SSU72, PPP2R5B, PPP2R5A, PPP2R5C, SRRM1, WDR33, DDX39B, WDR82, ETF1, PABPC1, LOC122454175, RBM8A, RNMT, CSTF3, CSTF2, GSPT2, GSPT1, LOC122433528, LOC122435903, NXF1, FIP1L1, PPP2R3C, LOC122421663, SAP18, CPSF4, CPSF7, CPSF6, RNGTT, LOC122434723, FUS, CPSF2, NUDT21, …	3140	115	10427	1.44378	0.634564	0.0112947	0.00712335
KEGG_PATHWAY	ccad05214:Glioma	37	0.516543	0.00334865	RB1, CAMK2D, SHC1, ARAF, PIK3CD, TGFA, LOC122427080, PIK3R1, IGF1R, NRAS, LOC122420753, AKT2, AKT3, PLCG2, AKT1, E2F2, E2F3, BAK1, PLCG1, HRAS, MAPK3, PRKCG, PDGFRB, GADD45A, PRKCB, PRKCA, LOC122445547, PIK3CA, CDK4, BAX, KRAS, CALM3, CAMK1, RAF1, SOS1, TP53, CALM2	3140	80	10427	1.53582	0.692937	0.0130969	0.00826
KEGG_PATHWAY	ccad05142:Chagas disease	50	0.698032	0.00352328	LOC122429249, SERPINE1, PIK3CD, PPP2R2A, CD3G, FASLG, IKBKB, CASP8, PPP2R1A, AKT2, AKT3, AKT1, IKBKG, CHUK, IFNGR1, IFNGR2, IRAK4, TGFBR2, TNFRSF1A, PIK3CA, TRAF6, TLR6, PLCB2, TLR4, TLR2, C1QB, GNAI3, PIK3R1, LOC122454307, GNAI1, RELA, GNAI2, MAPK8, IRAK1, FADD, MAPK3, SMAD2, TGFB1, NOS2, TGFB3, LOC122428005, CFLAR, MAPK14, NFKB1, MAPK13, NFKBIA, GNAO1, GNAL, FAS, MYD88	3140	116	10427	1.43134	0.711305	0.0136285	0.00859526
KEGG_PATHWAY	ccad03060:Protein export	22	0.307134	0.00367541	UBL4A, SRP19, SGTA, SRP54, SRP68, SRP14, BAG6, SEC61A1, SPCS3, OXA1L, SPCS2, SPCS1, SRP72, SEC61G, SRPRA, TMEM208, SRPRB, SEC61B, SEC11A, SEC11C, SEC63, GET4	3140	41	10427	1.78184	0.726411	0.0140624	0.00886892
GOTERM_MF_DIRECT	GO:0003729~mRNA binding	72	1.00517	0.00372676	CELF4, LOC122435446, HNRNPR, TENT4A, TENT4B, ZC3H12D, TIAL1, ZFP36, METTL14, PCF11, ZC3H12A, RBPMS2, LUC7L, SNRNP35, SRRM2, AQR, RBM15, RPS5, RPL13A, THOC2, THOC5, PTBP3, LOC122424380, NCL, ZNF638, RPL24, SRSF4, SRSF5, SF1, FYTTD1, LOC122430499, RBM47, RBM8A, YTHDC1, CSTF3, LOC122430498, SRSF1, CSTF2, HNRNPLL, LOC122433528, ZFP36L1, BCLAF1, RBM15B, PCBP4, PCBP1, G3BP1, PCBP2, PPP1R8, G3BP2, SF3B1…	5161	172	16442	1.3336	0.997217	0.279684	0.2772
KEGG_PATHWAY	ccad03430:Mismatch repair	15	0.209409	0.00372746	RFC5, PCNA, RFC4, RFC1, LIG1, RPA1, RPA2, MLH1, POLD3, MSH6, POLD4, MSH2, MSH3, POLD1, SSBP1	3140	24	10427	2.07544	0.731396	0.0141082	0.00889781
KEGG_PATHWAY	ccad05418:Fluid shear stress and atherosclerosis	67	0.935362	0.00401981	HSP90AB1, BMPR2, NCF1, PIK3CD, CTSV, ACTB, TXN2, IKBKB, LOC122420753, AKT2, AKT3, SUMO2, RAC2, AKT1, ITGAV, IKBKG, RAC1, MAP3K7, MAP3K5, ACVR1, MEF2A, PIAS4, HSP90AA1, CHUK, IL1R1, IL1R2, RHOA, TNFRSF1A, LOC122445547, PIK3CA, PECAM1, LOC122429517, LOC122421313, LOC122431193, SQSTM1, TP53, LOC122431348, PRKAA1, SDC4, SRC, MGST1, PIK3R1, TXN, RELA, HSP90B1, MAPK8, LOC122436632, LOC122435267, HMOX1,…	3140	165	10427	1.34841	0.75776	0.0150529	0.0094936
GOTERM_MF_DIRECT	GO:0031267~small GTPase binding	39	0.544465	0.0040766	CYFIP2, CYFIP1, DOCK5, IPO11, CCDC186, ROCK1, ROCK2, DENND5B, IPO7, GGA1, RABGEF1, RIMS1, IPO8, GOLGA4, RAB11FIP1, RINL, RIMS3, XPO6, TNPO2, RALBP1, RPH3AL, SYTL1, XPO7, CYRIB, SYTL4, SYTL3, SYTL2, FMNL3, DIAPH2, INF2, FMNL2, XPOT, DAAM2, RANGRF, RIN3, DOCK2, RIN2, GAS8, CDC42SE2	5161	83	16442	1.49695	0.9984	0.292033	0.289438
KEGG_PATHWAY	ccad05210:Colorectal cancer	44	0.614268	0.00409058	RALB, LEF1, TCF7, ARAF, PIK3CD, TGFA, PIK3R1, AREG, BBC3, NRAS, MAPK8, AKT2, CASP3, AKT3, RAC2, AKT1, BAK1, RAC1, HRAS, MAPK3, SMAD2, TCF7L2, SMAD4, SMAD3, TGFB1, TGFB3, GADD45A, BAD, MLH1, RHOA, TGFBR2, MSH6, RPS6KB1, PIK3CA, APC, MSH2, MSH3, BCL2, BAX, CTNNB1, KRAS, RAF1, SOS1, TP53	3140	100	10427	1.46111	0.763743	0.0151567	0.00955904
KEGG_PATHWAY	ccad04672:Intestinal immune network for IgA production	25	0.349016	0.00416829	CD86, LOC122429367, LOC122429640, LOC122429860, TNFRSF13B, CD80, LOC122429360, CXCR4, LOC122429364, LOC122429361, CCR9, TNFRSF17, LOC122429902, ITGB7, ICOS, TGFB1, LOC122429977, ITGA4, LOC122429976, CD40LG, CD28, LOC122429717, LOC122429978, LTBR, LOC122429718	3140	49	10427	1.69424	0.770145	0.0152837	0.00963918
KEGG_PATHWAY	ccad04640:Hematopoietic cell lineage	45	0.628228	0.00429716	LOC122429367, LOC122429640, LOC122429860, ITGAM, TFRC, LOC122429360, IL5RA, CD3G, LOC122429364, LOC122429361, CD19, CD38, LOC122434354, LOC122429902, CD37, IL6R, LOC122431282, CD55, CR2, IL4R, LOC122430523, LOC122429977, ITGA4, IL1R1, LOC122429976, IL11RA, IL1R2, ITGA2, ITGA1, FLT3LG, LOC122436524, CD4, CD5, KIT, IL3RA, LOC122429717, CD9, LOC122421553, ITGA6, LOC122429978, ITGA5, IL7R, MS4A1, CD2…	3140	103	10427	1.45079	0.78038	0.0155938	0.00983473
GOTERM_BP_DIRECT	GO:0006364~rRNA processing	23	0.321095	0.00451771	UTP15, WDR36, UTP11, IMP3, POP4, RRP1, PPAN, IMP4, RRP1B, PWP1, RBFA, NOL6, BYSL, YBEY, PDCD11, MRTO4, MPHOSPH10, DROSHA, BRIX1, UTP14A, LYAR, NOP53, MDN1	5096	42	15999	1.71926	0.999991	0.892769	0.891726
KEGG_PATHWAY	ccad04612:Antigen processing and presentation	42	0.586347	0.0046066	LOC122429686, LOC122429367, CIITA, LOC122430139, LOC122429640, HSP90AB1, LOC122429860, LOC122429603, LOC122429624, LOC122423465, LOC122429360, LOC122428193, CTSV, LOC122429364, LOC122429361, LOC122429902, PDIA3, HSP90AA1, LOC122429977, NFYA, LOC122429976, HSPA4, NFYC, HSPA6, TAP2, TAP1, RFXANK, LOC122429593, LOC122429691, CD4, CANX, RFX5, LOC122429717, PSME1, LOC122421313, LOC122429978, LOC122430…	3140	95	10427	1.4681	0.803142	0.0165462	0.0104354
KEGG_PATHWAY	ccad04935:Growth hormone synthesis, secretion and action	53	0.739913	0.00480057	ATF2, PIK3CD, IRS2, GHR, AKT2, AKT3, CREB3L2, EP300, AKT1, PRKACA, JAK2, HRAS, PRKCG, PRKCB, PRKCA, ADCY9, PIK3CA, LOC122429837, RAF1, SOS1, CRK, PLCB2, LOC122441627, ATF4, CREB5, ATF6B, SHC1, GNAI3, ITPR2, PIK3R1, CACNA1C, LOC122454307, ADCY7, LOC122432714, GNAI1, GNAI2, SOCS2, SOCS3, NRAS, MAPK8, SOCS1, PLCG2, PLCG1, MAPK3, MAP3K1, STAT1, LOC122428005, STAT3, MAPK14, PTK2, MAPK13, KRAS, MRAP2	3140	126	10427	1.3968	0.816193	0.0170687	0.0107649
KEGG_PATHWAY	ccad05100:Bacterial invasion of epithelial cells	39	0.544465	0.00489696	ITGB1, LOC122434658, SHC1, SRC, ARPC1B, ARPC1A, PXN, CLTC, PIK3CD, PIK3R1, CBL, SEPTIN11, ACTB, CDC42, LOC122435083, RAC1, WASF2, ACTR3, ACTR2, LOC122424660, SEPTIN1, SEPTIN2, LOC122425750, CAV1, RHOG, FN1, SEPTIN6, ARPC4, ARPC5, SEPTIN9, RHOA, PTK2, ARPC2, PIK3CA, CTNNB1, ELMO3, ITGA5, MET, CRK	3140	87	10427	1.48859	0.822354	0.0172373	0.0108713
KEGG_PATHWAY	ccad04922:Glucagon signaling pathway	49	0.684071	0.00508271	PYGB, ATF2, PDE3B, PRKAG1, LOC122433908, GYS1, PPP3CA, PPP3CB, PPP3CC, LOC122420753, AKT2, AKT3, CREB3L2, EP300, AKT1, PRKACA, CPT1A, PRMT1, PGAM1, PGAM2, PHKA1, PPP4R3A, CPT1C, PRKAB1, PHKA2, LOC122445547, PKM, SIK1, SIK2, PLCB2, FBP1, ATF4, CREB5, CAMK2D, PRKAA1, LOC122430777, ITPR2, PDHB, LOC122454307, LOC122430778, FOXO1, LDHB, PPP3R1, LOC122435300, LOC122422755, PCK2, CALM3, PFKM, CALM2	3140	115	10427	1.41491	0.833652	0.017714	0.0111719
KEGG_PATHWAY	ccad05230:Central carbon metabolism in cancer	36	0.502583	0.00514894	LOC122430777, PIK3CD, LOC122433908, SLC1A5, PIK3R1, PDHB, HIF1A, LOC122430778, GLS, LDHB, NRAS, AKT2, AKT3, AKT1, LOC122435300, LOC122422755, SLC16A3, HRAS, MAPK3, PDGFRB, TIGAR, G6PD, IDH1, PGAM1, IDH2, PGAM2, SIRT6, PKM, PIK3CA, KIT, KRAS, RAF1, MET, TP53, PFKM, FGFR2	3140	79	10427	1.51323	0.837505	0.0177689	0.0112065
GOTERM_BP_DIRECT	GO:0016192~vesicle-mediated transport	44	0.614268	0.00521228	ARF3, ARF4, STX12, STX16, ARL6, LOC122423465, TGFBRAP1, STXBP2, LOC122424894, ARL1, CHM, LOC122428193, HSPA13, GGA1, RABGEF1, LOC122444868, ARL5B, RINL, SCFD2, VPS11, AP1S2, AP1S1, AP4S1, CHML, AP1S3, ARL5A, SPAG9, JAGN1, VPS33A, VPS33B, STX7, TVP23A, MAPK8IP3, ARL4A, CNIH1, VAMP1, RAB38, RIN3, SFT2D2, RIN2, SFT2D1, VAMP2, MON1A, MON1B	5096	96	15999	1.43895	0.999999	0.931188	0.930101
GOTERM_BP_DIRECT	GO:0043123~positive regulation of canonical NF-kappaB signal transduction	24	0.335055	0.00553962	TRIM62, TRAF3IP2, PPM1L, DAPK1, TRADD, SHISA5, FASLG, TRAF2, NOD2, TMEM101, PPM1A, AKAP13, SHARPIN, LOC122429726, S100A4, IKBKG, LTBR, RBCK1, LURAP1, MAP3K7, CARD11, MYD88, TMEM9B, C23H18ORF32	5096	45	15999	1.67441	0.999999	0.931188	0.930101
GOTERM_BP_DIRECT	GO:0006457~protein folding	43	0.600307	0.00602922	LOC122432636, HSP90AB1, ARL2, DNAJC25, CWC27, MESD, HSP90B1, NUDCD3, HSPH1, GRPEL1, LOC122435267, QSOX1, CCT8, CCT5, TXNDC5, NKTR, PDIA3, RANBP2, CCT2, TRAP1, NUDC, PPIL1, HSP90AA1, PPIL2, HSPA4, VBP1, PTGES3, LOC122434904, CLPX, PDRG1, PDIA4, CCT6A, PDCL3, DNAJA3, CANX, TCP1, PPIH, PFDN2, P4HB, LOC122421313, PPIL3, PPIA, PPID	5096	94	15999	1.43616	1	0.931188	0.930101
GOTERM_MF_DIRECT	GO:0000287~magnesium ion binding	41	0.572386	0.0061495	PRPS2, PRPS1, ATP8A1, MAST4, ATP10D, ATP10A, THG1L, PRPSAP1, THTPA, RPS6KA3, RPS6KA6, RNASEH1, RPS6KA2, RPS6KA1, PGM3, PGM2, ATP9B, MAP3K7, ENOPH1, AASDHPPT, IDH3A, ATP8B4, PKLR, IDH3G, ATP8B1, IDH1, EPHX2, ITPK1, IDH2, ATP11C, ATP11B, ATP11A, IRAK4, NT5C3B, PPM1A, NUDT7, PKM, PPA2, PPA1, HPRT1, FARSB	5161	90	16442	1.45132	0.99994	0.421375	0.417631
GOTERM_BP_DIRECT	GO:0034097~response to cytokine	8	0.111685	0.00622391	MAPKAPK3, SELL, REL, SELE, RELA, NFKB1, NFKB2, RELB	5096	9	15999	2.79069	1	0.931188	0.930101
KEGG_PATHWAY	ccad01200:Carbon metabolism	57	0.795756	0.00642091	GPI, ADPGK, MCEE, ME1, PHGDH, DLAT, PGLS, MMUT, HIBCH, IDH3A, G6PD, SDS, TPI1, GPT2, PGAM1, PGAM2, TALDO1, SDHC, PGD, SDHA, PKM, PCCA, PCCB, RGN, SUCLG2, SUCLG1, IDNK, ACOX3, ALDOA, TKT, GAPDH, FBP1, PRPS2, PRPS1, GOT1L1, SHMT2, RPE, PDHB, ADH5, ACAT2, TKFC, PGK1, LOC122435300, HAO2, PKLR, IDH3G, MDH2, GLYCTK, IDH1, IDH2, GOT2, CS, RPIA, GLUD1, ALDH6A1, SUCLA2, PFKM	3140	139	10427	1.36173	0.896424	0.0219433	0.0138392
GOTERM_MF_DIRECT	GO:0005085~guanyl-nucleotide exchange factor activity	69	0.963284	0.00650181	DOCK5, TRIO, DOCK9, DENND5B, DOCK8, RASGRF1, DOCK7, ITSN1, ARHGEF10L, DOCK10, EEF1B2, AKAP13, DOCK11, RABGEF1, PREX1, RINL, RASGEF1A, RASGEF1B, PSD4, RCC1, FBXO8, RALGPS2, PLEKHG3, ARHGEF10, ARHGEF12, PLEKHG2, SH2D3C, PLEKHG6, ARHGEF19, TIAM2, TIAM1, ALS2, SPATA13, ARHGEF3, RAPGEF1, ARHGEF4, ARHGEF1, RIN3, DENND6A, DOCK2, SOS1, RAPGEF6, RIN2, RAPGEF3, RAPGEF4, ARHGEF6, RAP1GDS1, RASGRP2, RASGRP1,…	5161	167	16442	1.3163	0.999966	0.426952	0.42316
KEGG_PATHWAY	ccad05222:Small cell lung cancer	45	0.628228	0.00653044	ITGB1, RB1, CDKN1B, LAMA3, PIK3CD, PIK3R1, FHIT, RELA, IKBKB, RXRA, AKT2, CASP3, AKT3, AKT1, E2F2, E2F3, ITGAV, BAK1, IKBKG, SKP2, ZBTB17, CDKN2B, CHUK, NOS2, APAF1, GADD45A, ITGA2, FN1, TRAF2, TRAF1, NFKB1, PTK2, NFKBIA, PIK3CA, CDK4, COL4A1, CCNE1, TRAF6, COL4A3, BCL2, CKS2, BAX, ITGA6, TP53, BIRC3	3140	105	10427	1.42316	0.900366	0.022103	0.01394
KEGG_PATHWAY	ccad03082:ATP-dependent chromatin remodeling	53	0.739913	0.00695402	LOC122429327, CHD4, YEATS4, RSF1, ACTB, YY1, YY2, ING3, VPS72, BCL7C, BCL7B, RUVBL1, DPF2, EPC2, ARID2, NFRKB, LOC122422040, SS18, PBRM1, SMARCC1, SMARCC2, BAZ1A, ARID1A, MORF4L1, MORF4L2, LOC122423776, INO80C, SMARCD1, SMARCD2, HDAC2, HDAC1, BAZ2A, LOC122429181, BAZ2B, LOC122424293, LOC122429185, TFPT, LOC122455070, RBBP4, BRD9, RBBP7, MTA2, BRD7, SMARCE1, LOC122430005, PHF10, BICRAL, MCRS1, MBD…	3140	128	10427	1.37498	0.914254	0.0233125	0.0147028
GOTERM_BP_DIRECT	GO:0043161~proteasome-mediated ubiquitin-dependent protein catabolic process	42	0.586347	0.00697332	USP14, RNF34, PSMD14, UBXN2B, ZFAND2A, TNFAIP1, PSMD8, PSMD6, COP1, MAEA, PSMD7, RMND5A, HECTD1, SHARPIN, PSMD2, TRIM3, PSMD1, LOC122433440, PSMF1, RFFL, HACE1, NHLRC3, SIAH2, SIAH1, RAD23A, UBE2G1, BFAR, UBE2A, KCTD5, DDB1, PSMA5, SPSB3, NSFL1C, PSMC4, KCTD13, SPOPL, PLAA, ERCC8, NHLRC1, TRIP12, RBCK1, KCTD17	5096	92	15999	1.43326	1	0.931188	0.930101
KEGG_PATHWAY	ccad04620:Toll-like receptor signaling pathway	48	0.67011	0.00725347	CD86, CD80, PIK3CD, PIK3R1, RELA, IKBKB, MAPK8, CASP8, TBK1, IRAK1, AKT2, AKT3, SPP1, AKT1, RIPK1, MAP3K8, IKBKG, FADD, RAC1, MAP3K7, MAPK3, JAK1, IFNAR2, CHUK, STAT1, LOC122428005, TYK2, IRAK4, MAPK14, NFKB1, MAPK13, TLR1, NFKBIA, CXCL10, IRF3, PIK3CA, TRAF6, IRF7, TLR8, TLR7, TAB2, TLR6, TAB1, TLR4, MYD88, TLR3, IFNAR1, TLR2	3140	114	10427	1.39819	0.92289	0.024087	0.0151912
GOTERM_BP_DIRECT	GO:0008360~regulation of cell shape	20	0.279213	0.00728664	LOC122434658, LOC122434313, RDX, PALM3, RHOG, MSN, PALM2AKAP2, FMNL3, FMNL2, PALM, PLXNB3, PLXNB2, PLXNB1, RAC1, PLXNC1, NF2, EZR, MET, BRWD3, PLXNA3	5096	36	15999	1.74418	1	0.931188	0.930101
KEGG_PATHWAY	ccad05014:Amyotrophic lateral sclerosis	164	2.28954	0.00745262	NUP107, NUP188, NDUFA12, ACTB, PSMD8, TUBB6, PSMD6, PSMD7, TBK1, PSMD2, TUBB1, KIF5A, PSMD1, MAP3K5, NUP214, SDHC, SDHA, ATG14, LOC122434949, NUP93, ERN1, ATXN2L, LOC122434662, SRSF3, LOC122421476, ULK1, LOC122455265, VDAC1, MATR3, NUP98, LOC122421478, PFN1, TP53, SQSTM1, OPTN, ATF4, SEH1L, PSMD11, NDUFB10, PSMD14, PSMD13, NDUFB11, ATP5MC2, PIK3R4, ATP5MC3, KLC1, C9ORF72, NUP160, LOC122433528, LO…	3140	461	10427	1.18133	0.928148	0.024517	0.0154625
GOTERM_BP_DIRECT	GO:0030968~endoplasmic reticulum unfolded protein response	14	0.195449	0.00758222	HERPUD2, PARP6, ATF6B, WFS1, AMFR, DERL1, HERPUD1, PARP8, ERLEC1, LOC122420205, TBL2, SERP1, OS9, SELENOS	5096	22	15999	1.99788	1	0.931188	0.930101
GOTERM_BP_DIRECT	GO:0050870~positive regulation of T cell activation	17	0.237331	0.00778676	LOC122429367, LOC122429640, LOC122429860, LOC122429977, LOC122429976, LOC122429360, LOC122448423, CYRIB, LOC122429364, HSPD1, LOC122429361, LOC122448418, LOC122429717, SIRPA, LOC122429902, LOC122429978, LOC122429718	5096	29	15999	1.84041	1	0.931188	0.930101
KEGG_PATHWAY	ccad05320:Autoimmune thyroid disease	28	0.390898	0.00786186	CD86, LOC122429686, LOC122429367, LOC122429640, LOC122429860, LOC122429603, LOC122429624, CD80, PRF1, LOC122429360, FASLG, LOC122429364, LOC122429361, LOC122455090, CTLA4, LOC122429902, LOC122455194, LOC122429977, LOC122429976, LOC122429593, LOC122429691, CD40LG, CD28, LOC122429717, FAS, LOC122455089, LOC122429978, LOC122429718	3140	59	10427	1.57593	0.937857	0.0256239	0.0161605
KEGG_PATHWAY	ccad00564:Glycerophospholipid metabolism	45	0.628228	0.00797143	CDS1, AGPAT5, LOC122431107, LPGAT1, DGKA, PLA2G5, AGPAT1, PLA2G6, AGPAT4, PLD2, PGS1, PTDSS2, PTDSS1, GPAT4, GPAT3, CEPT1, CDIPT, LYPLA2, LYPLA1, PLA2G12A, CHKB, PCYT1A, CHKA, MBOAT1, PLA2G4A, CRLS1, LOC122430747, PISD, LOC122432869, PLA2G15, LOC122435493, PHOSPHO1, GPD2, ETNK1, DGKQ, GPD1, LPCAT2, CHPT1, GPD1L, PNPLA6, LPIN1, PLPP3, LPIN2, PLPP1, CDS2	3140	106	10427	1.40973	0.940226	0.0257426	0.0162354
GOTERM_CC_DIRECT	GO:0000151~ubiquitin ligase complex	17	0.237331	0.00857817	PRKN, ANKIB1, AMFR, DCUN1D3, DCUN1D4, DCUN1D1, UBR3, RNF19B, UBE4A, UBR2, UBR1, LOC122436505, RNF144A, RNF144B, ABTB1, ARIH2, ARIH1	4744	30	15361	1.83486	0.998326	0.492293	0.489639
GOTERM_CC_DIRECT	GO:0005654~nucleoplasm	65	0.907441	0.00862508	RNF13, MAML1, NOC2L, OASL, NKRF, KPNA6, CHAMP1, KPNA4, KPNA5, KPNA3, KPNA1, MORC4, RAD23A, PPP4R3A, PPHLN1, ARID1A, TTI2, EMSY, LOC122422848, RNF167, SHQ1, RBM12B, PSME1, HNRNPH2, SREK1, TRIM56, PRR13, HEMGN, RBM48, NUFIP2, YTHDC1, ANKRD12, NOLC1, LIN9, WRN, TAF1D, HNRNPDL, MIER3, PCBP1, TASOR, MIER1, PCBP2, MTA2, SRSF11, TRIM45, TRMT10A, NPM1, CENPW, TRMT10C, STYX, LOC122435776, PML, TNRC6C, ARH…	4744	160	15361	1.31543	0.998384	0.492293	0.489639
GOTERM_BP_DIRECT	GO:0007249~canonical NF-kappaB signal transduction	13	0.181488	0.00869931	NFKBIL1, TANK, RELA, NFKB1, RELB, NFKB2, NKIRAS1, NKIRAS2, TIFA, REL, TLR8, TLR7, AZI2	5096	20	15999	2.04069	1	0.931188	0.930101
GOTERM_BP_DIRECT	GO:0045332~phospholipid translocation	13	0.181488	0.00869931	LOC122428697, ATP8B4, TMEM30A, TMEM30B, SLC66A2, ATP8A1, ATP8B1, ATP10D, ATP11C, ATP10A, ATP11B, ATP11A, ATP9B	5096	20	15999	2.04069	1	0.931188	0.930101
GOTERM_BP_DIRECT	GO:0007059~chromosome segregation	13	0.181488	0.00869931	CENPT, CENPW, NDE1, LOC122435778, SKA1, SKA2, MIS18A, CENPH, TLK2, TLK1, TOP1, SPC25, CDK5RAP2	5096	20	15999	2.04069	1	0.931188	0.930101
GOTERM_BP_DIRECT	GO:0000413~protein peptidyl-prolyl isomerization	16	0.22337	0.0090981	FKBP11, RANBP2, LOC122432636, PPIL1, FKBP2, PPIL2, PPWD1, CWC27, LOC122434904, PPIH, PPIL3, PPIA, PPIL4, PPID, PPIL6, NKTR	5096	27	15999	1.86046	1	0.93492	0.933829
KEGG_PATHWAY	ccad01524:Platinum drug resistance	38	0.530504	0.00910832	LOC122431348, TOP2B, MGST1, PIK3CD, LOC122427080, FASLG, PIK3R1, BBC3, CASP8, AKT2, CASP3, AKT3, REV3L, AKT1, BAK1, FADD, ATP7A, POLH, MAPK3, MAP3K5, APAF1, PDPK1, SLC31A1, BAD, MLH1, MSH6, PIK3CA, MSH2, MSH3, ERCC1, BCL2, BAX, FAS, LOC122429517, ATM, LOC122431193, TP53, BIRC3	3140	87	10427	1.45042	0.960078	0.0291466	0.0183822
KEGG_PATHWAY	ccad04720:Long-term potentiation	34	0.474661	0.00930373	CAMK2D, ARAF, ITPR2, CACNA1C, RAP1B, PPP1CC, RPS6KA3, PPP3CA, GRM5, PPP3R1, RPS6KA6, NRAS, PPP3CB, PPP3CC, LOC122420753, RAP1A, RPS6KA2, RPS6KA1, EP300, PRKACA, HRAS, MAPK3, PRKCG, PRKCB, PRKCA, GRIN2D, LOC122445547, KRAS, CALM3, RAF1, PLCB2, CALM2, RAPGEF3, ATF4	3140	76	10427	1.48558	0.962755	0.0292939	0.0184751
KEGG_PATHWAY	ccad04650:Natural killer cell mediated cytotoxicity	59	0.823677	0.00932077	LOC122433865, PRF1, ARAF, PIK3CD, FASLG, ITGAL, LOC122455090, PPP3CA, PPP3CB, PPP3CC, CASP3, RAC2, TNFSF10, RAC1, HRAS, PRKCG, IFNAR2, LOC122429598, LOC122429597, LOC122429596, SYK, PRKCB, IFNGR1, IFNGR2, PRKCA, LOC122433858, NCR1, LAT2, PIK3CA, LCK, LCP2, LOC122432087, RAF1, SOS1, IFNAR1, LOC122423736, SHC1, PIK3R1, PAK1, NRAS, PPP3R1, SH3BP2, PLCG2, PTK2B, FYN, PLCG1, LOC122455194, MAPK3, SH2D1…	3140	147	10427	1.3328	0.96298	0.0292939	0.0184751
KEGG_PATHWAY	ccad05010:Alzheimer disease	167	2.33143	0.00952282	LOC122427221, NDUFA12, ARAF, IRS2, PSMD8, TUBB6, PSMD6, PSMD7, SLC39A9, AKT2, PSMD2, TUBB1, KIF5A, AKT3, SLC39A6, AKT1, PSMD1, SLC39A8, SLC39A7, CAPN1, SLC39A1, MAP3K5, CSNK2A2, ADAM10, SDHC, SDHA, ATG14, LOC122434949, ERN1, ADAM17, LOC122435630, CSNK2B, VDAC3, LOC122434662, VDAC2, LOC122421476, ULK1, LOC122455265, VDAC1, LOC122421478, RAF1, PPID, ATF4, RTN3, PSMD11, NDUFB10, PSMD14, PSMD13, NDUF…	3140	473	10427	1.17242	0.965545	0.029664	0.0187085
GOTERM_MF_DIRECT	GO:0003714~transcription corepressor activity	41	0.572386	0.00956714	RERE, URI1, CTBP1, ATN1, LOC122420494, LIMD1, NOC2L, TOB2, LOC122424292, IRF2BPL, UXT, SIN3B, TRIM28, SIN3A, BASP1, MIER3, MIER1, WDR5, SAP18, CIR1, TBL1X, MTA2, BEND6, TLE3, CASP8AP2, LOC122452850, SFMBT1, PHF12, IRF2BP1, KCTD1, CDYL, TRERF1, TLE7, CDYL2, TLE5, TBL1XR1, BCOR, ZMYND11, BCORL1, RCOR3, RCOR1	5161	92	16442	1.41977	1	0.587869	0.582647
GOTERM_MF_DIRECT	GO:0033691~sialic acid binding	11	0.153567	0.0100714	LOC122420643, SELL, LOC122421552, LOC122421553, LOC122420629, LOC122420639, SELE, LOC122420648, LOC122420637, SIGLEC5, LOC122420647	5161	16	16442	2.19025	1	0.587869	0.582647
GOTERM_MF_DIRECT	GO:0042826~histone deacetylase binding	11	0.153567	0.0100714	MEF2A, ZNF683, BRMS1, PRDM4, MIER3, BRMS1L, MIER1, PRDM15, SUDS3, PRDM1, MTA2	5161	16	16442	2.19025	1	0.587869	0.582647
KEGG_PATHWAY	ccad01522:Endocrine resistance	41	0.572386	0.010286	NOTCH2, RB1, NOTCH1, CDKN1B, SHC1, SRC, NOTCH4, ARAF, PIK3CD, LOC122427080, PIK3R1, LOC122454307, ADCY7, IGF1R, NRAS, MAPK8, AKT2, GPER1, AKT3, AKT1, E2F2, E2F3, PRKACA, HRAS, MAPK3, BAD, NCOA3, MAPK14, PTK2, MAPK13, ADCY9, RPS6KB1, PIK3CA, CDK4, SP1, BCL2, BAX, KRAS, RAF1, SOS1, TP53	3140	96	10427	1.41822	0.973732	0.0317602	0.0200306
GOTERM_CC_DIRECT	GO:0005789~endoplasmic reticulum membrane	94	1.3123	0.0102917	SLC35B3, SLC35B2, PIGO, PGAP2, PIGN, SLC35B1, MOGAT1, MIA2, IER3IP1, PIGV, TRAM2, PIGX, HERPUD1, UFL1, JPH3, RHBDF1, WDR83OS, JAGN1, ELOVL4, RSAD2, ALG6, LMAN1L, RHBDF2, LOC122433058, LOC122454618, TAP2, IRAG2, ALG12, DNAJB14, ALG11, TMEM170A, DDOST, SELENON, PIGB, SOAT1, SELENOS, TBC1D20, CANX, RFT1, LOC122432561, SELENOT, TKT, SEC22B, ERGIC1, SLC27A4, GRAMD1C, CDS1, SAMD8, SGMS1, SEL1L, DERL1, …	4744	245	15361	1.24233	0.999536	0.530094	0.527236
GOTERM_BP_DIRECT	GO:0000122~negative regulation of transcription by RNA polymerase II	114	1.59151	0.0103956	ZNF572, ZNF175, NOC2L, UXT, ZNF81, LOC122420279, ZNF605, LOC122420034, ZNF329, SAP130, ZNF569, SOX8, LOC122424239, TRIM27, ZNF445, LOC122434428, ZFP1, NSMCE3, LOC122420143, SOX12, BRMS1, LOC122420023, ZNF557, BCORL1, ZNF793, URI1, MAGED1, GATA6, GATA2, PHF21A, ZFP57, ATXN1, ZKSCAN7, MIER3, MIER1, ZNF789, NDN, ZNF787, SUDS3, LOC122420618, PATZ1, LYAR, ZNF782, ZBTB17, DR1, CBX5, VDR, MAGEE2, PHF12,…	5096	295	15999	1.21324	1	0.987463	0.986309
KEGG_PATHWAY	ccad04664:Fc epsilon RI signaling pathway	32	0.44674	0.0104779	PIK3CD, PIK3R1, NRAS, MAPK8, ALOX5, AKT2, AKT3, PLCG2, RAC2, AKT1, FYN, PLCG1, RAC1, HRAS, MAPK3, LYN, SYK, PDPK1, LOC122428005, PLA2G4A, PRKCA, GAB2, MAPK14, MAPK13, PIK3CA, BTK, KRAS, LCP2, RAF1, MS4A2, SOS1, LAT	3140	71	10427	1.49665	0.975465	0.0320714	0.0202268
GOTERM_BP_DIRECT	GO:0051603~proteolysis involved in protein catabolic process	15	0.209409	0.0106278	CTSW, CTSV, IDE, PSMB10, PSMB8, PSMB9, RNF123, PSMB7, CTSO, PSMB1, CTSH, CTSF, CTSC, LGMN, RSPRY1	5096	25	15999	1.88371	1	0.987463	0.986309
GOTERM_BP_DIRECT	GO:0007229~integrin-mediated signaling pathway	22	0.307134	0.0107625	ITGB1, SEMA7A, MPIG6B, FYB1, ITGAM, ITGA4, ITGA2, TXK, ITGA1, ITGAL, PRAM1, FGR, TEC, LOC122433255, ZYX, ITGA7, ITGA6, ITGB7, ITGAV, ITGA5, ITGA9, FERMT3	5096	42	15999	1.64451	1	0.987463	0.986309
KEGG_PATHWAY	ccad04920:Adipocytokine signaling pathway	33	0.460701	0.0110836	PRKAA1, TRADD, PRKAG1, IRS2, ADIPOR2, LOC122432714, RELA, IKBKB, SOCS3, MAPK8, RXRA, AKT2, AKT3, AKT1, IKBKG, JAK2, PCK2, CPT1A, CHUK, ACSL1, STAT3, ACSL4, TRAF2, ACSL3, CPT1C, TNFRSF1B, PRKAB1, NFKB1, TNFRSF1A, NFKBIA, PRKCQ, NFKBIE, NFKBIB	3140	74	10427	1.48085	0.980222	0.033633	0.0212117
KEGG_PATHWAY	ccad04015:Rap1 signaling pathway	84	1.17269	0.0112507	ITGB1, ITGAM, PIK3CD, ITGAL, ACTB, IGF1R, LOC122420753, RASSF5, AKT2, AKT3, RAC2, AKT1, RAC1, HRAS, PRKCG, MAGI1, PDGFRB, PRKCB, MAGI3, HGF, F2R, PRKCA, RHOA, TIAM1, LOC122445547, ADCY9, PIK3CA, PRKD3, KIT, RAPGEF1, EVL, PRKD2, LCP2, PRKD1, TLN1, RAF1, PFN1, MET, RAPGEF6, CRK, PLCB2, SKAP1, RAPGEF3, EPHA2, RAPGEF4, RALB, RGS14, SRC, GNAI3, LPAR1, PIK3R1, LOC122454307, RASGRP2, ADCY7, GNAI1, GNAI2…	3140	222	10427	1.25648	0.981365	0.0338482	0.0213475
GOTERM_BP_DIRECT	GO:0030866~cortical actin cytoskeleton organization	11	0.153567	0.0112638	FMNL3, NCKAP1, FMNL2, ROCK1, EPB41, EPB41L1, ROCK2, EPB41L2, EPB41L3, NCKAP1L, RHOQ	5096	16	15999	2.15842	1	0.997814	0.996649
GOTERM_CC_DIRECT	GO:0030688~preribosome, small subunit precursor	9	0.125646	0.0114306	LTV1, NOB1, RIOK3, RRP1, TSR1, RRP1B, RIOK1, SLX9, BYSL	4744	12	15361	2.42849	0.999803	0.530094	0.527236
GOTERM_CC_DIRECT	GO:0031463~Cul3-RING ubiquitin ligase complex	9	0.125646	0.0114306	KLHL9, KLHL15, CUL3, KLHL7, KCTD13, TNFAIP1, KLHL13, KCTD17, KCTD5	4744	12	15361	2.42849	0.999803	0.530094	0.527236
KEGG_PATHWAY	ccad04623:Cytosolic DNA-sensing pathway	35	0.488622	0.0122297	SAMHD1, MEFV, RELA, IKBKB, CASP7, CASP8, TBK1, PCBP1, CASP3, G3BP1, POLR2F, RIPK1, IKBKG, FADD, POLR2L, ZBP1, RIPK3, MLKL, CHUK, LOC122433435, POLR3GL, LOC122454316, TREX1, NFKB1, LOC122438562, NFKBIA, CXCL10, POLR3A, IRF3, POLR3D, POLR1C, IRF7, POLR3K, ZCCHC3, NFKBIB	3140	80	10427	1.45281	0.986851	0.0361751	0.022815
KEGG_PATHWAY	ccad05133:Pertussis	35	0.488622	0.0122297	ITGB1, C1QB, ITGAM, C1R, GNAI3, NOD1, RELA, GNAI1, GNAI2, CASP7, MAPK8, LOC122420753, IRAK1, CASP3, CFL1, LOC122429824, LOC122426558, MAPK3, LOC122426540, LOC122433435, NOS2, IRAK4, MAPK14, RHOA, NFKB1, MAPK13, LOC122445547, IRF3, TRAF6, IRF8, CALM3, ITGA5, TLR4, CALM2, MYD88	3140	80	10427	1.45281	0.986851	0.0361751	0.022815
KEGG_PATHWAY	ccad04940:Type I diabetes mellitus	27	0.376937	0.0123434	CD86, LOC122429686, LOC122429367, LOC122429640, LOC122429860, LOC122429603, LOC122429624, CD80, PRF1, LOC122429360, FASLG, LOC122429364, HSPD1, LOC122429361, LOC122455090, LOC122429902, LOC122455194, LOC122429977, LOC122429976, LOC122429593, LOC122429691, CD28, LOC122429717, FAS, LOC122455089, LOC122429978, LOC122429718	3140	58	10427	1.54584	0.987373	0.0362074	0.0228353
KEGG_PATHWAY	ccad05202:Transcriptional misregulation in cancer	77	1.07497	0.0125533	CD86, ATF1, SPI1, ITGAM, CDKN1B, CCNT1, JMJD1C, BMI1, LOC122432738, AFF1, IGF1R, ELK4, LOC122455090, HHEX, CCND2, SIN3A, NFKBIZ, LOC122434794, ITGB7, KDM6A, MEN1, SS18, IL1R2, MITF, TRAF1, PAX5, MLF1, RUNX2, SUPT3H, DUSP6, TGFBR2, ETV6, RUNX1, CCNA2, MAF, SPINT1, PAX8, BMP2K, ERG, MET, TP53, BIRC3, CEBPA, CEBPB, HDAC2, SLC45A3, BCL2A1, HDAC1, PRCC, LOC122425345, LOC122427080, FOXO1, RELA, FUT8, R…	3140	202	10427	1.26581	0.988283	0.0365188	0.0230317
GOTERM_BP_DIRECT	GO:0050853~B cell receptor signaling pathway	10	0.139606	0.0126435	LAT2, CD79A, TEC, SYK, LCK, NFAM1, CD19, BTK, CTLA4, BMX	5096	14	15999	2.24252	1	1	0.999221
GOTERM_CC_DIRECT	GO:0042555~MCM complex	7	0.0977244	0.0131347	MCM7, MCM8, MCM9, MCM3, MCM5, MCM6, MCM2	4744	8	15361	2.83324	0.999945	0.541966	0.539044
KEGG_PATHWAY	ccad04520:Adherens junction	43	0.600307	0.0132768	ROCK1, ROCK2, SRC, LEF1, TCF7, WAS, PTPRJ, IQGAP1, ACTB, IGF1R, RAP1B, CDC42, RAP1A, RAC2, KRIT1, EP300, FYN, RAC1, WASF2, ACP1, LOC122425824, MAP3K7, MAPK3, PTPN1, TCF7L2, SMAD4, SMAD3, SMURF2, HEG1, LOC122454534, CSNK2A2, ARHGAP29, SORBS1, ACTN4, RHOA, TGFBR2, TJP1, PTPRB, CSNK2B, CTNNB1, PTPN6, MET, NECTIN2	3140	103	10427	1.38631	0.990948	0.0379997	0.0239657
KEGG_PATHWAY	ccad03013:Nucleocytoplasmic transport	63	0.87952	0.0132783	AHCTF1, IPO11, NUP107, NXT1, NUP188, LOC122424037, LOC122436414, PHAX, IPO7, PNN, IPO8, XPO6, SUMO2, KPNA6, LOC122455175, LOC122427624, KPNA4, KPNA5, KPNA3, TNPO2, KPNA1, NDC1, NUP214, UPF1, SEC13, LOC122423495, THOC1, THOC3, THOC2, THOC5, SENP2, THOC7, SRRM1, THOC6, NUP93, EEF1A1, DDX39B, TMEM33, NUP50, NUP98, NUP58, SEH1L, RBM8A, NUP160, LOC122433528, NXF1, NUP85, TPR, LOC122421663, SAP18, RAE1…	3140	161	10427	1.2994	0.990953	0.0379997	0.0239657
KEGG_PATHWAY	ccad04514:Cell adhesion molecules	64	0.89348	0.013392	ITGB1, CD86, LOC122429686, LOC122429367, LOC122429640, ITGAM, LOC122429603, CD80, LOC122429360, ITGAL, LOC122429364, PVR, VSIR, LOC122429361, SPN, ALCAM, CDH2, CTLA4, ITGB7, ITGAV, ITGA4, LOC122429593, VCAN, MAG, CLDN12, PECAM1, LOC122429717, ITGA6, CD226, ITGA9, LOC122429718, NLGN2, LOC122429860, SDC4, LOC122429624, SDC3, CD99L2, VTCN1, GLG1, LOC122436632, LOC122429902, ICOS, JAM2, CD99, JAM3, N…	3140	164	10427	1.29588	0.991312	0.0380161	0.0239761
GOTERM_MF_DIRECT	GO:0003700~DNA-binding transcription factor activity	44	0.614268	0.0138198	CREBZF, ZNF395, ZNF250, PRDM15, CREBL2, IKZF1, IKZF2, FOXM1, IKZF5, REPIN1, LOC122421408, LOC122420610, LOC122439762, NFIL3, ZNF628, LOC122420035, HSF2, TRPS1, LOC122420619, ZNF821, LOC122421246, E4F1, ZNF202, GTF2I, ZNF683, ESRRA, BCL11B, ZFP2, LOC122420044, LOC122420022, LOC122420021, FOXN2, LOC122425072, NR6A1, LOC122420720, LOC122420586, LOC122420046, ZSCAN22, ZSCAN21, LOC122421399, ZNF358, L…	5161	102	16442	1.37427	1	0.77569	0.7688
GOTERM_CC_DIRECT	GO:0005739~mitochondrion	191	2.66648	0.013864	ISCA2, IFI27L2, MTCH1, OXNAD1, ISCA1, LOC122454843, ECI1, ARAF, MICOS10, PHB2, YARS2, TMEM143, TXN2, ATP5IF1, LOC122419678, CHCHD2, ABHD11, CHCHD6, NARS2, NUDT19, PDK3, PMPCA, MMUT, ACAD11, HADH, SLC25A44, MCCC2, RARS2, ACOT9, LOC122434823, CPT1A, TSTD3, RSAD2, LIG1, PHYKPL, CMC2, ECH1, CMC1, LOC122435357, TOMM34, MUL1, LOC122420262, CPT1C, PISD, ARMCX3, ARMCX1, ARMCX2, WDR81, MTHFD2, PDE12, GPD2…	4744	538	15361	1.14954	0.999968	0.541966	0.539044
GOTERM_BP_DIRECT	GO:0046854~phosphatidylinositol phosphate biosynthetic process	16	0.22337	0.0139029	PI4K2B, CISH, INPP1, TTC7A, PIK3R1, SOCS2, SOCS3, SOCS1, IMPA2, PI4KA, IP6K1, SOCS6, SOCS7, PI4K2A, SOCS5, IP6K2	5096	28	15999	1.79401	1	1	0.999221
GOTERM_BP_DIRECT	GO:0000422~autophagy of mitochondrion	16	0.22337	0.0139029	PRKN, GABARAPL2, FIS1, GABARAPL1, WDR45B, WIPI1, WIPI2, FUNDC2, LOC122420655, PINK1, MAP1LC3B, FUNDC1, RB1CC1, FBXO7, ATG7, ATG5	5096	28	15999	1.79401	1	1	0.999221
GOTERM_MF_DIRECT	GO:0003755~peptidyl-prolyl cis-trans isomerase activity	23	0.321095	0.0142735	FKBP11, RANBP2, LOC122432636, PPIL1, FKBP2, PPIL2, FKBP15, FKBP14, PPWD1, CWC27, LOC122434904, PTPA, PIN1, PPIH, PPIL3, FKBP4, PPIA, PPIL4, FKBP6, PPID, PPIL6, FKBP5, NKTR	5161	46	16442	1.59291	1	0.77569	0.7688
GOTERM_BP_DIRECT	GO:0032956~regulation of actin cytoskeleton organization	13	0.181488	0.0144789	LOC122434658, ROCK2, RHOG, FAM107A, ARHGEF19, ARHGAP17, IQGAP1, IQGAP2, PAK1, SH3BP1, MLST8, RAC1, PAK3	5096	21	15999	1.94351	1	1	0.999221
GOTERM_CC_DIRECT	GO:0015630~microtubule cytoskeleton	20	0.279213	0.0146951	SEPTIN1, SEPTIN2, LOC122425750, CKAP2, SEPTIN5, SEPTIN6, ARL2, SEPTIN9, SEPTIN11, RASSF1, PSRC1, SPAST, MAP7D3, KATNA1, MAP7D2, LOC122438655, TEKT2, MAP7, BMERB1, GTSE1	4744	39	15361	1.66051	0.999983	0.541966	0.539044
GOTERM_BP_DIRECT	GO:0007264~small GTPase-mediated signal transduction	29	0.404858	0.0148569	DOCK5, LOC122434658, DOCK9, DOCK8, DOCK7, CHM, RND1, RHOBTB2, DOCK10, CDC42, DOCK11, RHOT2, RAC2, CHML, RAC1, RALBP1, SH2D3C, RHOG, RHOH, RHOF, RHOC, RHOA, TIAM2, ARHGAP32, TIAM1, RABIF, RHOV, DOCK2, RHOQ	5096	61	15999	1.49256	1	1	0.999221
GOTERM_BP_DIRECT	GO:0006268~DNA unwinding involved in DNA replication	8	0.111685	0.0150431	RECQL4, WRN, RECQL5, MCM7, RPA1, RECQL, MCM6, MCM2	5096	10	15999	2.51162	1	1	0.999221
GOTERM_CC_DIRECT	GO:0030139~endocytic vesicle	11	0.153567	0.0156604	RABGEF1, AMN, RINL, HEATR5A, HEATR5B, RIN3, STAM2, RAB11FIP3, RIN2, RAPGEF6, RAB11FIP4	4744	17	15361	2.09517	0.999992	0.541966	0.539044
KEGG_PATHWAY	ccad05340:Primary immunodeficiency	18	0.251291	0.0163806	CIITA, TNFRSF13B, TAP2, TAP1, RFXANK, IL2RG, UNG, CD79A, CD4, CD40LG, PTPRC, LCK, CD19, RFX5, BTK, IKBKG, IL7R, ICOS	3140	35	10427	1.70779	0.997014	0.0460876	0.0290666
KEGG_PATHWAY	ccad04066:HIF-1 signaling pathway	55	0.767835	0.0164973	LOC122425560, CDKN1B, TFRC, SERPINE1, PIK3CD, LOC122433908, IGF1R, AKT2, AKT3, EP300, AKT1, ELOB, TIMP1, IL6R, PRKCG, PRKCB, IFNGR1, IFNGR2, RPS6, PRKCA, RBX1, PIK3CA, ALDOA, EIF4E2, GAPDH, TLR4, CAMK2D, LOC122430777, PFKFB3, LOC122435269, PIK3R1, PDHB, HIF1A, LOC122430778, RELA, LDHB, EIF4EBP1, PGK1, PLCG2, LOC122435300, HMOX1, PLCG1, LOC122422755, EIF4E, MAPK3, EGLN3, EGLN2, NOS2, STAT3, NFKB1,…	3140	139	10427	1.31395	0.997136	0.0460876	0.0290666
GOTERM_BP_DIRECT	GO:0030041~actin filament polymerization	12	0.167528	0.0168737	WASHC5, PSTPIP1, DIAPH2, ARPC2, PSTPIP2, SPIRE2, FAM107A, SPIRE1, ARPC4, FHDC1, WASHC3, TTC17	5096	19	15999	1.98286	1	1	0.999221
GOTERM_BP_DIRECT	GO:0018230~peptidyl-L-cysteine S-palmitoylation	12	0.167528	0.0168737	LOC122454316, ZDHHC20, ZDHHC23, ZDHHC12, ZDHHC24, ZDHHC7, ZDHHC2, GOLGA7, ZDHHC14, ZDHHC3, ZDHHC4, ZDHHC15	5096	19	15999	1.98286	1	1	0.999221
GOTERM_BP_DIRECT	GO:0034314~Arp2/3 complex-mediated actin nucleation	12	0.167528	0.0168737	ACTR3, LOC122435083, ACTR2, LOC122424660, ARPC2, ARPC1B, ARPC1A, WIPF3, ARPC4, WHAMM, ARPC5, WASHC1	5096	19	15999	1.98286	1	1	0.999221
GOTERM_CC_DIRECT	GO:0014069~postsynaptic density	24	0.335055	0.0173548	USP8, RTN3, RTN1, DBNL, LOC122454970, HOMER2, ERBIN, SCRIB, ADD3, SHISA8, ADD1, RTN4, PPP1R9B, LRRC1, ADD2, CDH2, LOC122436520, DNAJC6, NEURL1, TMEM108, TAX1BP3, SHANK3, SHANK2, SHANK1	4744	50	15361	1.55423	0.999998	0.541966	0.539044
GOTERM_MF_DIRECT	GO:0019706~protein-cysteine S-palmitoyltransferase activity	11	0.153567	0.0176465	LOC122454316, ZDHHC20, ZDHHC23, ZDHHC12, ZDHHC24, ZDHHC7, ZDHHC2, ZDHHC14, ZDHHC3, ZDHHC4, ZDHHC15	5161	17	16442	2.06141	1	0.907032	0.898974
GOTERM_CC_DIRECT	GO:0000118~histone deacetylase complex	13	0.181488	0.017721	KDM3A, KDM3B, JMJD1C, HR, TRERF1, PHF21A, HDAC7, TBL1XR1, SAP30L, WDR5, TBL1X, RCOR3, RCOR1	4744	22	15361	1.91335	0.999998	0.541966	0.539044
KEGG_PATHWAY	ccad05332:Graft-versus-host disease	29	0.404858	0.0178028	CD86, LOC122429686, LOC122429367, LOC122429640, LOC122429860, LOC122429603, LOC122429624, CD80, PRF1, LOC122429360, FASLG, LOC122429364, LOC122429361, LOC122455090, LOC122429902, LOC122455194, LOC122429977, LOC122429976, LOC122429593, LOC122429691, CD28, LOC122429717, FAS, LOC122455089, LOC122429978, LOC122421336, LOC122421337, LOC122429718, LOC122423736	3140	65	10427	1.48154	0.998205	0.0493431	0.0311198
GOTERM_MF_DIRECT	GO:0004715~non-membrane spanning protein tyrosine kinase activity	16	0.22337	0.0178414	LYN, PKDCC, SYK, SRC, TXK, TYK2, BMX, FGR, TEC, LCK, FES, BTK, ABL2, FYN, JAK2, JAK1	5161	29	16442	1.75769	1	0.907032	0.898974
GOTERM_CC_DIRECT	GO:0005768~endosome	39	0.544465	0.0179337	LRPAP1, PI4K2B, WASHC5, STEAP3, STEAP4, SLC66A2, UNC93B1, RAB3D, VPS26B, GPR62, CLINT1, C9ORF72, TGOLN2, STAMBPL1, RAB40C, LEPROTL1, VPS11, PACSIN2, TOM1, RAB28, ATP9B, RAB8A, SNX5, SNX6, UVRAG, RAB4B, M6PR, RABL2B, TMEM175, EPN1, TOM1L1, TOM1L2, RAB37, DOP1A, RAB12, OCIAD1, PIK3C3, PI4K2A, VPS35L	4744	91	15361	1.38771	0.999999	0.541966	0.539044
KEGG_PATHWAY	ccad04530:Tight junction	73	1.01913	0.018238	ITGB1, PATJ, LOC122429249, ARPC1B, LOC122434313, ARPC1A, PRKAG1, PPP2R2A, YBX3, ACTB, AMOT, LOC122435083, TUBA1B, PPP2R1A, RAC1, PRKACA, LOC122431282, RAB8A, MAP3K5, MAGI1, ACTR3, ACTR2, LOC122424660, LOC122454534, SCRIB, ACTN4, PRKAB1, RHOA, RUNX1, RAP2C, TIAM1, MYL6, CLDN12, MYH9, EZR, RAPGEF6, PRKAA1, PCNA, ROCK1, ROCK2, SRC, WAS, NEDD4L, ARHGAP17, CDC42, MAPK8, PARD6B, RAP1A, MICALL2, MYH11, …	3140	193	10427	1.25602	0.998465	0.0501546	0.0316316
GOTERM_CC_DIRECT	GO:0005770~late endosome	15	0.209409	0.0184086	RUBCN, PXK, ANKRD27, PARM1, CLEC16A, PIK3R4, TMEM192, IGF2R, RAB32, TMEM59, FYCO1, SNX14, VPS35, RAB7B, RAB7A	4744	27	15361	1.79888	0.999999	0.541966	0.539044
GOTERM_CC_DIRECT	GO:0005694~chromosome	15	0.209409	0.0184086	ZNF276, ZNF692, SETD2, MAZ, HP1BP3, RECQL, LOC122435778, SMC1A, SMC1B, SMC2, RECQL4, WRN, RECQL5, ZNF711, TOP1	4744	27	15361	1.79888	0.999999	0.541966	0.539044
KEGG_PATHWAY	ccad04130:SNARE interactions in vesicular transport	19	0.265252	0.0184755	STX16, STX7, STX18, GOSR1, SNAP23, BET1L, STX11, STX6, BNIP1, VTI1A, STX5, VAMP1, STX4, STX3, SEC22B, SNAP29, YKT6, VAMP5, VAMP2	3140	38	10427	1.66035	0.99859	0.0504137	0.031795
GOTERM_CC_DIRECT	GO:0008021~synaptic vesicle	25	0.349016	0.0189907	STX12, RAB3D, TPRG1L, STON2, CLCN3, STX11, RAB40C, STX3, LOC122441658, RAB8A, SNAPIN, SEPTIN1, SEPTIN2, LOC122425750, STX7, SEPTIN5, BTBD8, SYN2, TMEM230, SYT7, CLCN4, BIN1, RAB12, PICALM, CDK16	4744	53	15361	1.52735	0.999999	0.541966	0.539044
KEGG_PATHWAY	ccad04936:Alcoholic liver disease	57	0.795756	0.0194912	TRADD, PRKAG1, LOC122428192, FASLG, IKBKB, CASP8, TBK1, AKT2, CASP3, AKT3, AKT1, MLYCD, IKBKG, MAP3K7, MAP3K5, SREBF1, CPT1A, CHUK, IRAK4, CPT1C, PRKAB1, TNFRSF1A, IRF3, TRAF6, ACOX3, TLR4, C1QB, PRKAA1, TCF7, LEF1, C5AR1, FOXO3, ADIPOR2, FOXO1, ADH5, RELA, MAPK8, IRAK1, TRA2A, RIPK1, FADD, LOC122429824, TCF7L2, LOC122428005, MAPK14, NFKB1, MAPK13, NFKBIA, SCD, CTNNB1, FAS, TAB3, TAB2, TAB1, LPIN…	3140	146	10427	1.29644	0.999021	0.0527763	0.033285
GOTERM_MF_DIRECT	GO:0035091~phosphatidylinositol binding	32	0.44674	0.0195175	PLEKHF2, PXK, PLEKHF1, NCF1, PITPNA, NCF4, SNX11, SNX30, PIK3C2B, PLD2, GGA1, SNX4, SNX29, SNX25, SH3PXD2B, TOM1, PXDC1, SNX9, SNX5, SNX6, LOC122450994, TOM1L1, TOM1L2, SH3YL1, SNX18, SNX19, SNX17, PITPNM2, AIDA, SGK1, STAM2, ZCCHC2	5161	71	16442	1.43586	1	0.958051	0.949541
GOTERM_MF_DIRECT	GO:0140662~ATP-dependent protein folding chaperone	21	0.293173	0.0200607	TRAP1, CCT2, LOC122430139, HSP90AA1, HSP90AB1, HSPA4, LOC122423465, HSPA6, LOC122428193, HSPA13, CLPX, HSPD1, HSP90B1, CCT6A, HSPH1, TCP1, LOC122435267, LOC122421313, LOC122430141, CCT8, CCT5	5161	42	16442	1.59291	1	0.958051	0.949541
GOTERM_BP_DIRECT	GO:0031122~cytoplasmic microtubule organization	16	0.22337	0.0204559	DST, TUBGCP2, CCDC13, SLAIN2, TBCB, HOOK3, WDR73, CLIP3, CCDC88B, CLIP2, CLIP1, HOOK1, CCDC88C, CLIP4, TUBGCP5, TUBGCP4	5096	29	15999	1.73215	1	1	0.999221
KEGG_PATHWAY	ccad04914:Progesterone-mediated oocyte maturation	39	0.544465	0.0207439	HSP90AB1, PDE3B, ARAF, GNAI3, PIK3CD, PIK3R1, ADCY7, GNAI1, IGF1R, GNAI2, CCNB3, STK10, RPS6KA3, CCNB1, RPS6KA6, MAPK8, AKT2, RPS6KA2, CDC26, RPS6KA1, AKT3, CDC27, AKT1, PRKACA, MAPK3, HSP90AA1, KIF22, MAPK14, CDC25A, MAPK13, CCNA2, ADCY9, PIK3CA, ANAPC4, KRAS, LOC122421313, RAF1, CPEB4, MAD2L1	3140	94	10427	1.37774	0.999376	0.0557393	0.0351538
GOTERM_MF_DIRECT	GO:0004843~cysteine-type deubiquitinase activity	41	0.572386	0.0211091	USP35, OTUD4, OTUB2, USP14, OTUD5, USP37, USP15, USP16, USP27X, USP53, USP32, USP54, USP10, USP11, USP34, USP12, TNFAIP3, OTUD7B, USP39, USP19, UCHL1, USP46, USP47, USP8, USP25, USP48, USP7, USP49, USP20, USP42, LOC122423793, USP9X, USP4, USP22, USP3, CYLD, OTULIN, OTUD1, BAP1, OTULINL, OTUB1	5161	96	16442	1.36061	1	0.97847	0.969778
KEGG_PATHWAY	ccad03022:Basal transcription factors	24	0.335055	0.0214524	TAF15, LOC122454266, TAF12, TAF10, GTF2H1, GTF2H3, GTF2H4, GTF2E1, TAF5L, GTF2E2, GTF2H5, TAF6L, CDK7, ERCC3, ERCC2, TAF8, TBPL1, TAF4B, TAF7, TAF6, TAF9B, TAF3, TAF2, GTF2I	3140	52	10427	1.53263	0.999516	0.0572064	0.036079
GOTERM_CC_DIRECT	GO:0012505~endomembrane system	27	0.376937	0.0221253	AGPAT5, LRPAP1, STX12, LPGAT1, STX16, STX11, AGPAT4, PGRMC2, ODR4, CLPTM1, STX5, STX4, STX3, WLS, SSR4, RNF24, STX7, LOC122434809, CNPY3, TMEM230, NRBP1, TMEM199, VMP1, RNF145, IFT22, CLPTM1L, TMCC1	4744	59	15361	1.48179	1	0.608037	0.604759
GOTERM_BP_DIRECT	GO:0045454~cell redox homeostasis	10	0.139606	0.022763	PRDX5, PRDX4, TXNRD3, TXNRD2, TXNRD1, PRDX1, KRIT1, SELENOT, PRDX6, TXN2	5096	15	15999	2.09301	1	1	0.999221
KEGG_PATHWAY	ccad05160:Hepatitis C	70	0.977244	0.0233169	RB1, SCARB1, YWHAB, CD81, LOC122429249, TRADD, ARAF, PIK3CD, PPP2R2A, FASLG, IKBKB, CASP8, TBK1, PPP2R1A, AKT2, CASP3, AKT3, AKT1, IKBKG, HRAS, JAK1, IFNAR2, CHUK, RSAD2, APAF1, TRAF2, TYK2, YWHAZ, TNFRSF1A, LOC122422848, PIK3CA, IRF3, TRAF6, CLDN12, IRF7, RAF1, SOS1, TP53, TLR3, IFNAR1, PIK3R1, RELA, SOCS3, NRAS, RXRA, E2F2, E2F3, RIPK1, BAK1, FADD, MAPK3, LOC122423150, STAT1, BAD, EIF2AK1, STAT…	3140	186	10427	1.24973	0.999753	0.0617108	0.0389199
GOTERM_CC_DIRECT	GO:0005743~mitochondrial inner membrane	48	0.67011	0.0237721	MRS2, SLC25A3, SLC27A1, ABCB7, SHMT2, MCUB, LOC122426554, LOC122452428, GHITM, MICOS10, MAIP1, HSPD1, LOC122431725, SLC25A26, NNT, MPC1, TIMM17B, MPC1L, SLC25A42, SLC25A25, LOC122436608, LOC122427212, TRAP1, LOC122454255, NDUFA3, LOC122426180, EXOG, LOC122428087, DHODH, SLC25A38, LETM1, OXA1L, COQ2, SMDT1, TMEM11, SLC25A19, SFXN3, YME1L1, LOC122421476, SFXN1, LOC122455265, OCIAD2, LETMD1, SLC25A5…	4744	118	15361	1.31715	1	0.62996	0.626564
GOTERM_MF_DIRECT	GO:0043138~3'-5' DNA helicase activity	9	0.125646	0.0240261	RECQL4, WRN, RECQL5, ERCC3, DHX9, RECQL, MCM5, LOC122422743, MCM2	5161	13	16442	2.20557	1	1	0.991746
KEGG_PATHWAY	ccad05213:Endometrial cancer	27	0.376937	0.0253048	LEF1, TCF7, ARAF, PIK3CD, PIK3R1, FOXO3, ELK1, NRAS, AKT2, AKT3, AKT1, BAK1, HRAS, MAPK3, TCF7L2, PDPK1, GADD45A, BAD, MLH1, PIK3CA, APC, BAX, CTNNB1, KRAS, RAF1, SOS1, TP53	3140	61	10427	1.46982	0.999879	0.0664722	0.0419228
GOTERM_CC_DIRECT	GO:0005942~phosphatidylinositol 3-kinase complex	11	0.153567	0.0256182	SOCS2, SOCS3, LOC122425452, SOCS1, CISH, PIK3CD, PIK3R1, SOCS6, SOCS7, SOCS5, PIK3C2B	4744	18	15361	1.97877	1	0.655473	0.65194
GOTERM_BP_DIRECT	GO:0071363~cellular response to growth factor stimulus	9	0.125646	0.0262715	ACVR1, ACVRL1, BMPR2, ACVR1C, BMPR1B, ACVR1B, ACVR2A, TGFBR2, BMPR1A	5096	13	15999	2.17351	1	1	0.999221
GOTERM_BP_DIRECT	GO:0098887~neurotransmitter receptor transport, endosome to postsynaptic membrane	9	0.125646	0.0262715	GRIP1, GRIPAP1, LOC122454970, LOC122436520, ERBIN, SCRIB, TAX1BP3, LOC122426519, LRRC1	5096	13	15999	2.17351	1	1	0.999221
GOTERM_MF_DIRECT	GO:0051015~actin filament binding	67	0.935362	0.0264404	WDR1, ARPC1B, ARPC1A, RCSD1, SYNE3, PPP1R9B, LOC122435083, PSTPIP1, CAPZB, PSTPIP2, CFL1, COTL1, PLS3, SPTAN1, ACTR3, ACTR2, LOC122424660, DBNL, ACTN3, TPM3, TPM1, SHROOM2, SHROOM3, ACTN4, ABITRAM, FRG1, GAS2, MYH9, TLN1, TWF2, LOC122435468, IQGAP1, IQGAP2, ADD3, CORO1A, ADD1, CORO1B, CORO1C, LOC122431989, ADD2, SPTA1, ABLIM2, SCIN, FLNA, FLNB, LOC122422159, MYH11, LOC122426558, CTNNAL1, SPTBN1, …	5161	171	16442	1.24824	1	1	0.991746
KEGG_PATHWAY	ccad05012:Parkinson disease	123	1.71716	0.0266678	LOC122427221, NDUFA12, PARK7, TXN2, UBE2L3, PSMD8, TUBB6, PSMD6, PSMD7, SLC39A9, PSMD2, TUBB1, KIF5A, SLC39A6, PSMD1, SLC39A8, SLC39A7, PRKACA, SLC39A1, MAP3K5, SDHC, SDHA, LOC122434949, ERN1, VDAC3, LOC122434662, VDAC2, LOC122421476, LOC122455265, VDAC1, LOC122421478, TP53, UBA52, ATF4, PSMD11, UBA7, NDUFB10, PSMD14, PSMD13, NDUFB11, MAOA, ATP5MC2, ITPR2, ATP5MC3, LOC122454307, TXN, KLC1, UBE2J1…	3140	349	10427	1.17033	0.999926	0.0695339	0.0438538
GOTERM_BP_DIRECT	GO:0016579~protein deubiquitination	34	0.474661	0.0272276	USP35, OTUD4, USP14, OTUD5, USP37, USP15, USP27X, PSMD14, USP53, USP32, USP54, USP10, USP11, USP34, USP12, USP39, USP19, UCHL1, USP46, USP47, USP25, USP48, USP7, USP49, USP20, USP42, LOC122423793, USP9X, USP4, DESI2, USP22, USP3, OTUD1, BAP1	5096	77	15999	1.38628	1	1	0.999221
KEGG_PATHWAY	ccad00520:Amino sugar and nucleotide sugar metabolism	24	0.335055	0.02735	LOC122433944, GPI, CMAS, LOC122423043, PMM1, LOC122429743, MPI, GFPT1, PMM2, LOC122454606, LOC122454605, UAP1, NPL, UGDH, UGP2, GNPDA2, GMDS, AMDHD2, FPGT, UAP1L1, PGM3, PGM2, GNPNAT1, GNE	3140	53	10427	1.50371	0.999942	0.0707882	0.0446448
GOTERM_BP_DIRECT	GO:0002682~regulation of immune system process	20	0.279213	0.0277268	ZBTB17, LOC122431699, ZBTB49, ZBTB16, LOC122420143, LOC122420196, ZBTB11, LOC122420192, LOC122420513, ZNF37A, LOC122420213, LOC122420201, LOC122440466, LOC122420023, ZNF789, LOC122424239, ZNF787, PATZ1, ZNF641, GZF1	5096	40	15999	1.56976	1	1	0.999221
GOTERM_MF_DIRECT	GO:0042605~peptide antigen binding	8	0.111685	0.0277441	LOC122429598, LOC122429686, LOC122429597, LOC122429596, LOC122429603, LOC122429624, LOC122429593, LOC122429691	5161	11	16442	2.31696	1	1	0.991746
GOTERM_MF_DIRECT	GO:0017116~single-stranded DNA helicase activity	8	0.111685	0.0277441	MCM7, MCM8, MCM9, MCM3, WRNIP1, MCM5, DNA2, MCM2	5161	11	16442	2.31696	1	1	0.991746
GOTERM_MF_DIRECT	GO:0003887~DNA-directed DNA polymerase activity	11	0.153567	0.0286965	POLD3, POLB, POLA1, POLD4, POLD1, REV3L, POLI, POLL, POLH, PRIMPOL, POLG	5161	18	16442	1.94689	1	1	0.991746
KEGG_PATHWAY	ccad04926:Relaxin signaling pathway	52	0.725953	0.0288759	ATF2, RXFP4, PIK3CD, EDNRB, AKT2, AKT3, CREB3L2, AKT1, PRKACA, HRAS, PRKCA, TGFBR2, ADCY9, PIK3CA, COL4A1, COL4A3, RAF1, SOS1, PLCB2, ATF4, CREB5, ATF6B, SHC1, SRC, GNAI3, LOC122449754, PIK3R1, LOC122454307, ADCY7, GNAI1, RELA, GNAI2, NRAS, GNG10, MAPK8, GNG8, MAPK3, SMAD2, TGFB1, NOS2, LOC122428005, VEGFB, VEGFC, MAPK14, NFKB1, VEGFA, MAPK13, NFKBIA, GNAO1, GNB2, GNB4, KRAS	3140	134	10427	1.28863	0.999967	0.0741921	0.0467916
GOTERM_CC_DIRECT	GO:0009897~external side of plasma membrane	73	1.01913	0.0288793	CD86, LOC122429686, LOC122433865, ITGAM, TFRC, LOC122429603, HFE, CD80, LOC122423222, IL5RA, CD3G, ITGAL, GHR, SPN, LOC122434355, CTLA4, LOC122423225, LOC122434354, ITGAV, IL6R, LOC122431282, LOC122436370, IL13RA1, LOC122429598, LOC122429994, LOC122429597, LOC122429596, IL4R, ITGA4, ITGA2, BTN1A1, ATP6AP2, ITGA1, LOC122436524, BTN3A3, LOC122429593, LOC122433858, CD200R1, LOC122433255, ITGA7, ITGA…	4744	192	15361	1.23111	1	0.693747	0.690007
GOTERM_BP_DIRECT	GO:0050852~T cell receptor signaling pathway	16	0.22337	0.029095	LOC122429994, FYB1, MOG, BTN1A1, TXK, THEMIS, BTN3A3, PTPN22, PRAM1, PTPRC, TEC, THEMIS2, CD28, BTK, CTLA4, FYN	5096	30	15999	1.67441	1	1	0.999221
GOTERM_CC_DIRECT	GO:0005675~transcription factor TFIIH holo complex	7	0.0977244	0.0291443	CDK7, LOC122454266, ERCC3, GTF2H1, GTF2H3, GTF2H4, GTF2H5	4744	9	15361	2.51843	1	0.693747	0.690007
GOTERM_BP_DIRECT	GO:0032007~negative regulation of TOR signaling	8	0.111685	0.030075	GSK3A, LOC122429801, TMEM127, DDIT4, AKT1S1, TSC2, TSC1, MAPKAPK5	5096	11	15999	2.28329	1	1	0.999221
GOTERM_BP_DIRECT	GO:0016567~protein ubiquitination	49	0.684071	0.0306664	DET1, WDSUB1, RNF13, TNFAIP1, PRPF19, HERC5, DCAF1, HERC4, HERC2, LOC122429726, DTX3L, EIPR1, MUL1, FBXO11, RBX1, RNF167, LOC122435279, KCTD13, ZNF598, UBA52, CUL5, UHRF2, KLHL15, MGRN1, CUL3, UBR3, ASB11, UBR1, KLHL13, RCHY1, DCAF17, CAND1, UBB, MARCHF9, SOCS6, CRBN, RNF25, LOC122436505, MIB1, KLHL9, RNF223, RNF227, KLHL7, ASB9, RLIM, RNF181, ASB5, RNF220, CUL4B	5096	119	15999	1.29274	1	1	0.999221
GOTERM_CC_DIRECT	GO:0031901~early endosome membrane	10	0.139606	0.030849	SNX3, SNX19, SNX25, WDR91, SNX12, PMEPA1, LOC122440811, LDLRAD4, LOC122439581, SNX20	4744	16	15361	2.02374	1	0.693747	0.690007
GOTERM_CC_DIRECT	GO:0000932~P-body	22	0.307134	0.0318711	LSM1, SAMD4A, LOC122428462, LIMD1, PNRC1, PATL1, PAN2, EDC4, TNRC6C, CNOT7, PAN3, BTBD1, CNOT1, CNOT2, DCP1A, DCPS, APOBEC3A, TNRC6A, TNRC6B, APOBEC3B, DCP1B, DIS3L2	4744	47	15361	1.51565	1	0.693747	0.690007
KEGG_PATHWAY	ccad05146:Amoebiasis	46	0.642189	0.0319891	LOC122429962, RAB5B, RAB5C, SERPINB13, ITGAM, LAMA3, LOC122436776, HSPB1, PIK3CD, LOC122428192, PIK3R1, LOC122454307, RELA, LOC122425829, PRDX1, CASP3, PRKACA, LOC122431282, PRKCG, LOC122429576, LOC122429575, TGFB1, LOC122425696, NOS2, ARG1, IL1R1, LOC122425695, TGFB3, PRKCB, IL1R2, LOC122429733, FN1, PRKCA, ACTN4, NFKB1, PTK2, GNAL, PIK3CA, COL4A1, COL4A3, RAB7B, RAB5A, TLR4, PLCB2, RAB7A, TLR2	3140	117	10427	1.30557	0.999989	0.0815954	0.0514608
GOTERM_MF_DIRECT	GO:0000981~DNA-binding transcription factor activity, RNA polymerase II-specific	298	4.16027	0.0320732	ATF1, ATF2, SPI1, ZNF292, LOC122420031, BACH1, ELK1, LOC122432813, BACH2, ELK3, ELK4, SPIB, SPIC, LOC122420038, ZSCAN31, ZSCAN30, ZNF606, SOX18, MYB, CREB3L2, BBX, SOX8, PKNOX1, SOX6, PKNOX2, SOX5, MEF2A, ZNF283, SP110, ZNF281, SOX13, SOX12, RUNX3, RUNX2, RUNX1, ZSCAN20, LOC122420389, RFX5, ZSCAN26, ZNF711, TP53, ATF3, ZSCAN29, ZNF397, ZNF275, ZNF394, TSHZ3, SP140, ZNF391, TSHZ2, ARX, GATA6, TWIS…	5161	866	16442	1.09627	1	1	0.991746
GOTERM_BP_DIRECT	GO:0007030~Golgi organization	24	0.335055	0.0322463	LOC122425483, PI4K2B, ATP8B4, TMED10, UBXN2B, ATP8B1, LMAN1L, TANGO2, SEC16A, SURF4, COG3, LYSMD3, TJAP1, VMP1, NSFL1C, LMAN1, GOLPH3, GOLGA5, GORASP2, GORASP1, TMED3, DYM, LOC122433440, PI4K2A	5096	51	15999	1.47742	1	1	0.999221
GOTERM_CC_DIRECT	GO:0000445~THO complex part of transcription export complex	6	0.0837638	0.0325888	LOC122444987, THOC1, THOC3, THOC2, THOC5, THOC7	4744	7	15361	2.77542	1	0.693747	0.690007
KEGG_PATHWAY	ccad04310:Wnt signaling pathway	69	0.963284	0.0333482	WNT2B, CBY1, CCAR2, PPP3CA, CCND3, PPP3CB, CCND2, PPP3CC, RUVBL1, RAC2, EP300, RSPO1, RAC1, PRKACA, MAP3K7, SKP1, PRKCG, TLE3, FBXW11, PRKCB, CSNK2A2, PRKCA, SENP2, TLE7, RHOA, RBX1, DAAM2, TBL1XR1, CSNK2B, ROR2, PLCB2, TP53, PPARD, CAMK2D, CTBP1, ROCK2, TCF7, LEF1, WNT8B, PRICKLE1, LOC122420292, NKD1, PRICKLE4, LRP6, NKD2, MAPK8, PPP3R1, LOC122423369, LOC122424777, TBL1X, WNT4, TCF7L2, LOC122452…	3140	186	10427	1.23187	0.999993	0.0844502	0.0532612
GOTERM_BP_DIRECT	GO:0050684~regulation of mRNA processing	7	0.0977244	0.0339345	SRPK2, SRPK3, PTCD2, SLTM, DHX9, SAFB, SRPK1	5096	9	15999	2.44185	1	1	0.999221
GOTERM_BP_DIRECT	GO:0034976~response to endoplasmic reticulum stress	7	0.0977244	0.0339345	PDIA3, PPP1R15A, PPP1R15B, UFL1, P4HB, PDIA6, PDIA4	5096	9	15999	2.44185	1	1	0.999221
GOTERM_CC_DIRECT	GO:0000439~transcription factor TFIIH core complex	5	0.0698032	0.0341975	LOC122454266, GTF2H1, GTF2H3, GTF2H4, GTF2H5	4744	5	15361	3.23798	1	0.693747	0.690007
GOTERM_CC_DIRECT	GO:0070822~Sin3-type complex	5	0.0698032	0.0341975	BRMS1, PHF12, BRMS1L, SAP130, SUDS3	4744	5	15361	3.23798	1	0.693747	0.690007
GOTERM_BP_DIRECT	GO:0006289~nucleotide-excision repair	15	0.209409	0.0345007	STN1, LOC122454266, CETN2, OGG1, RPA1, RPA2, RAD23A, GTF2H1, GTF2H3, GTF2H4, GTF2H5, BRIP1, ERCC3, ERCC1, ERCC2	5096	28	15999	1.68189	1	1	0.999221
GOTERM_CC_DIRECT	GO:0071013~catalytic step 2 spliceosome	27	0.376937	0.0345938	SF3B2, LOC122428357, DDX23, CWC27, PRPF8, PNN, PUF60, SNRPD2, RBMX2, CWC22, DHX16, SNRPD3, SF3B1, SF3A1, AQR, PPIL1, SNRPN, PPIL2, LOC122423495, PLRG1, SNRNP40, SYF2, FRG1, SNRPG, SNRPF, PPIL3, SNRPB	4744	61	15361	1.43321	1	0.693747	0.690007
GOTERM_MF_DIRECT	GO:0004065~arylsulfatase activity	6	0.0837638	0.0349571	GALNS, ARSA, STS, ARSH, LOC122434372, LOC122434370	5161	7	16442	2.7307	1	1	0.991746
GOTERM_MF_DIRECT	GO:0004697~diacylglycerol-dependent serine/threonine kinase activity	6	0.0837638	0.0349571	PRKCG, PRKCH, PRKCB, PRKCD, PRKCA, PRKCQ	5161	7	16442	2.7307	1	1	0.991746
GOTERM_MF_DIRECT	GO:0004791~thioredoxin-disulfide reductase (NADPH) activity	5	0.0698032	0.0363016	TXNRD3, TXNRD2, NXN, TXNRD1, SELENOT	5161	5	16442	3.18582	1	1	0.991746
GOTERM_MF_DIRECT	GO:0031490~chromatin DNA binding	12	0.167528	0.0364911	TOX4, SUZ12, SBNO1, KDM3A, KDM3B, WBP2, POLE3, JMJD1C, EP300, HR, TOX, KDM6A	5161	21	16442	1.82047	1	1	0.991746
GOTERM_BP_DIRECT	GO:0006622~protein targeting to lysosome	6	0.0837638	0.037225	SCARB2, PXK, M6PR, LOC122440811, LOC122439581, SORL1	5096	7	15999	2.69102	1	1	0.999221
GOTERM_BP_DIRECT	GO:0048024~regulation of mRNA splicing, via spliceosome	6	0.0837638	0.037225	SON, HNRNPK, QKI, LOC122434481, SF1, SRRM1	5096	7	15999	2.69102	1	1	0.999221
GOTERM_BP_DIRECT	GO:0098968~neurotransmitter receptor transport postsynaptic membrane to endosome	6	0.0837638	0.037225	LOC122454970, LOC122436520, ERBIN, SCRIB, TAX1BP3, LRRC1	5096	7	15999	2.69102	1	1	0.999221
GOTERM_MF_DIRECT	GO:0031625~ubiquitin protein ligase binding	25	0.349016	0.0372291	DET1, CUL7, LOC122430139, CUL5, CUL3, NEDD8, FHIT, MAP1LC3B, UBB, GABARAPL2, GABARAPL1, HSPA6, ERLIN1, TRAF2, TRAF1, ERLIN2, NPLOC4, LOC122435279, SPOPL, TRIM37, LOC122430141, LTBR, UBA52, CACUL1, CUL4B	5161	55	16442	1.4481	1	1	0.991746
GOTERM_MF_DIRECT	GO:0005484~SNAP receptor activity	19	0.265252	0.037481	STX12, STX16, STX7, STX18, GOSR1, SNAP23, BET1L, STX11, STX6, BNIP1, VTI1A, STX5, VAMP1, STX4, STX3, SEC22B, SNAP29, YKT6, VAMP2	5161	39	16442	1.55206	1	1	0.991746
GOTERM_CC_DIRECT	GO:0005667~transcription regulator complex	34	0.474661	0.0377049	NFAT5, RARG, LIMD1, YY1, LOC122442624, YY2, SIX3, EP300, TLE3, ZNF143, LOC122452850, TCF12, PTOV1, NFATC3, NFATC2, NFATC1, TRERF1, TLE7, TLE5, RBL2, NR4A2, MED23, NR4A1, MED25, RBL1, TFDP1, TFDP2, SUB1, TCF4, ZNF875, TCF3, LOC122421412, RCOR3, RCOR1	4744	81	15361	1.35915	1	0.736238	0.732269
KEGG_PATHWAY	ccad01230:Biosynthesis of amino acids	34	0.474661	0.037873	PRPS2, PRPS1, GOT1L1, SHMT2, RPE, MAT2A, PGK1, PHGDH, ASL, GLUL, IDH3A, SDS, TPI1, PKLR, ARG1, IDH3G, IDH1, GPT2, PGAM1, IDH2, GOT2, PGAM2, PYCR1, TALDO1, PYCR2, CS, RPIA, PKM, BCAT1, ALDOA, TKT, GAPDH, PFKM, BCAT2	3140	83	10427	1.36029	0.999999	0.0952236	0.0600558
GOTERM_BP_DIRECT	GO:0038061~non-canonical NF-kappaB signal transduction	5	0.0698032	0.0383	REL, RELA, NFKB1, NFKB2, RELB	5096	5	15999	3.13952	1	1	0.999221
GOTERM_BP_DIRECT	GO:0043087~regulation of GTPase activity	18	0.251291	0.0385609	ARHGAP9, RASA4B, IQGAP1, RASAL2, RASAL3, IQGAP2, ARHGAP12, SYNGAP1, FGD6, RASA3, TRAPPC6B, PLXNB3, NF1, PLXNB2, PLXNB1, PLXNC1, MET, PLXNA3	5096	36	15999	1.56976	1	1	0.999221
GOTERM_BP_DIRECT	GO:0000398~mRNA splicing, via spliceosome	52	0.725953	0.0386812	LOC122428357, PRPF19, UBL5, RBMX2, CWC22, LOC122432056, SNRNP35, TXNL4A, RBM5, AQR, SNRPN, ZCRB1, PLRG1, GCFC2, PRPF4, DDX39B, PRPF3, SNRPG, SRSF3, SNRPA1, SNRNP25, SNRPF, SNRPA, SNRPB, SF3B5, LOC122430499, SF3B2, SF3B3, YTHDC1, LOC122430498, DDX23, U2AF1, SNU13, RNPC3, HTATSF1, PRPF8, U2AF1L4, ZMAT2, DHX38, RBM10, ZRSR2, GPKOW, LOC122430561, LOC122432027, YJU2, CDC5L, SMU1, XAB2, SNW1, RBM41, RN…	5096	129	15999	1.26554	1	1	0.999221
KEGG_PATHWAY	ccad00532:Glycosaminoglycan biosynthesis - chondroitin sulfate / dermatan sulfate	12	0.167528	0.0395379	CHSY1, CHPF, CHST11, CHST12, DSEL, DSE, CSGALNACT2, LOC122438259, UST, XYLT2, XYLT1, CHST13	3140	22	10427	1.81129	0.999999	0.0987045	0.0622511
GOTERM_MF_DIRECT	GO:0046935~1-phosphatidylinositol-3-kinase regulator activity	9	0.125646	0.0408581	SOCS2, SOCS3, SOCS1, CISH, PIK3R1, SOCS6, SOCS7, SOCS5, PIK3R5	5161	14	16442	2.04803	1	1	0.991746
GOTERM_BP_DIRECT	GO:0007179~transforming growth factor beta receptor signaling pathway	14	0.195449	0.0409853	ACVRL1, ACVR1, SMAD2, SMAD4, SMAD3, TGFB1, TGFB3, PXN, TGFBR2, SMAD7, DUSP22, GCNT2, ZYX, ADAM9	5096	26	15999	1.69051	1	1	0.999221
KEGG_PATHWAY	ccad04928:Parathyroid hormone synthesis, secretion and action	46	0.642189	0.0426171	ATF2, ATF6B, STK39, ARAF, GNAI3, ITPR2, PTH1R, LOC122454307, ADCY7, GNAI1, LRP6, GNAI2, PLD2, GNA13, AKAP13, MMP25, RXRA, CREB3L2, GNA12, PDE4B, PRKACA, FGF23, MAPK3, PRKCG, MEF2A, LOC122427212, VDR, PRKCB, PDE4D, PRKCA, OXSR1, RHOA, RUNX2, NR4A2, ADCY9, WNK1, SP1, NACA, WNK2, BCL2, ARHGEF1, SGK1, RAF1, PLCB2, ATF4, CREB5	3140	119	10427	1.28363	1	0.105642	0.0666268
GOTERM_BP_DIRECT	GO:0000724~double-strand break repair via homologous recombination	25	0.349016	0.0438507	MRE11, MCM8, MCM9, NUCKS1, SMC6, RECQL4, RAD51AP1, ZFYVE26, WRN, RECQL5, REV3L, ZSWIM7, STN1, RMI1, NSMCE1, RECQL, RPA1, RPA2, RAD51B, MMS22L, RAD51D, ERCC4, NABP1, SLX1A, LOC122434183	5096	55	15999	1.42706	1	1	0.999221
GOTERM_BP_DIRECT	GO:0002224~toll-like receptor signaling pathway	9	0.125646	0.0444422	TLR1, MAPKAPK3, UNC93B1, TLR8, TLR7, TLR6, TLR4, TLR3, TLR2	5096	14	15999	2.01826	1	1	0.999221
GOTERM_CC_DIRECT	GO:0030687~preribosome, large subunit precursor	14	0.195449	0.044791	LOC122454620, WDR37, NIP7, MAK16, RRP1, LOC122454607, PPAN, WDR74, RRP1B, WDR12, RPF1, LAS1L, MRTO4, MDN1	4744	27	15361	1.67896	1	0.831699	0.827215
GOTERM_CC_DIRECT	GO:0016604~nuclear body	8	0.111685	0.0448355	SETX, TRIM41, MSANTD1, SNAPC2, RMI1, SRRT, MAMLD1, PQBP1	4744	12	15361	2.15866	1	0.831699	0.827215
GOTERM_CC_DIRECT	GO:0016592~mediator complex	17	0.237331	0.0459814	CDK19, CCNC, MED29, MED17, MED28, MED23, MED12, BCLAF3, CDK8, MED14, BCLAF1, MED25, LOC122442624, MED13, THRAP3, MED10, MED21	4744	35	15361	1.57274	1	0.832151	0.827665
GOTERM_CC_DIRECT	GO:0005776~autophagosome	12	0.167528	0.0472008	GABARAPL2, FYCO1, GABARAPL1, MAP1LC3B, STK35, LOC122435464, TP53INP1, UBQLN1, TBC1D25, ULK1, ATG14, C9ORF72	4744	22	15361	1.76617	1	0.83388	0.829385
KEGG_PATHWAY	ccad00920:Sulfur metabolism	7	0.0977244	0.0480402	MPST, TST, ETHE1, SQOR, SUOX, PAPSS2, PAPSS1	3140	10	10427	2.32449	1	0.118253	0.0745799
GOTERM_BP_DIRECT	GO:0006406~mRNA export from nucleus	13	0.181488	0.0487903	FYTTD1, NUP107, THOC1, THOC3, THOC2, THOC5, THOC7, THOC6, LOC122433528, LOC122444987, DDX39B, NUP85, TPR	5096	24	15999	1.70057	1	1	0.999221
GOTERM_BP_DIRECT	GO:0045944~positive regulation of transcription by RNA polymerase II	67	0.935362	0.0509203	RNF10, GMEB1, CIITA, SETD3, CRTC3, GABPB2, CCNC, GABPB1, IKBKB, CHCHD2, SOX18, MED10, EP300, SAMD11, MEF2A, SS18, NCOA2, SLC30A9, CHUK, NCOA3, TET2, PTOV1, SOX12, SREBF2, KAT2B, MED25, THRAP3, TET3, PTMA, PPARD, KMT2D, DHX9, SRF, NR1I3, GATA6, GATA2, BCLAF3, PLAC8, STOX2, BCLAF1, RXRA, PCBP1, TP53BP1, WWOX, AKIRIN2, DR1, NPM1, BCL11B, VDR, MCRS1, NR1H2, ATAD2, SS18L2, NR1H3, NR1D2, LOC122428361, …	5096	174	15999	1.2089	1	1	0.999221
KEGG_PATHWAY	ccad01250:Biosynthesis of nucleotide sugars	18	0.251291	0.051201	MIOX, GPI, CMAS, PMM1, LOC122429743, MPI, GFPT1, PMM2, UAP1, UGDH, UGP2, GMDS, FPGT, UAP1L1, PGM3, PGM2, GNPNAT1, GNE	3140	39	10427	1.53263	1	0.125158	0.0789349
GOTERM_CC_DIRECT	GO:0005765~lysosomal membrane	27	0.376937	0.0517105	SLC46A3, ATP6V1A, PI4K2B, LOC122429860, SPPL2A, ZFYVE26, GPR137, LOC122429902, ATP6V1C1, HGSNAT, LOC122429977, LOC122429976, LOC122453721, LAPTM5, TMEM192, TM6SF1, TPCN2, GPR137B, TPCN1, RMC1, LOC122431318, CLCN7, TMEM79, LOC122429978, TMEM9B, PI4K2A, ARL8B	4744	63	15361	1.38771	1	0.873244	0.868537
GOTERM_CC_DIRECT	GO:0005764~lysosome	33	0.460701	0.0517827	SCARB2, ASAH1, UNC93B1, CTSW, CTSV, FYCO1, CLN3, NEU3, CTSO, DRAM1, SMPD1, MFSD1, CTSH, CTSF, LOC122432032, AGA, CTSD, CTSC, NAPSA, VPS33A, VPS33B, TMEM175, GALC, PLA2G15, RAB32, TMEM59, RRAGA, RRAGB, NAAA, PPT1, PPT2, RAB7B, RAB7A	4744	80	15361	1.33567	1	0.873244	0.868537
GOTERM_BP_DIRECT	GO:0008380~RNA splicing	8	0.111685	0.052621	PRPF18, SCNM1, SNRPD2, RBM8A, LOC122423495, RP9, CCAR2, SRSF11	5096	12	15999	2.09301	1	1	0.999221
GOTERM_BP_DIRECT	GO:0030336~negative regulation of cell migration	8	0.111685	0.052621	RAP2C, RAP2B, PLXNB3, SINHCAF, SRGAP3, SRGAP2, SRGAP1, ARHGAP4	5096	12	15999	2.09301	1	1	0.999221
GOTERM_MF_DIRECT	GO:0017056~structural constituent of nuclear pore	12	0.167528	0.052753	NUP214, NUP93, NUP107, NUP155, NUP188, NUP85, TPR, NUP35, NUP153, NUP98, NUP58, NUP160	5161	22	16442	1.73772	1	1	0.991746
KEGG_PATHWAY	ccad01100:Metabolic pathways	561	7.83191	0.0532005	PI4K2B, CDA, EHMT2, XYLT2, XYLT1, GLS, NSDHL, SCP2, NAMPT, PIP4K2A, PIP4K2C, MLYCD, MMUT, SDS, LOC122431037, DHDH, ADCY9, MTHFD2, ETHE1, LOC122434662, LOC122421476, IDNK, LOC122455265, HPRT1, LOC122421478, MPPE1, IDO2, PI4K2A, GNE, IDO1, MTMR1, TPH2, SHMT2, RPN1, PLA2G5, PLA2G6, HACD3, GNS, PLA2G7, ADH5, MTMR6, MTMR7, LDHB, RDH11, RDH10, PLCG2, ST3GAL4, PNPO, LOC122435300, HMOX1, PIP5K1A, ST3GAL6…	3140	1764	10427	1.05607	1	0.128362	0.0809557
KEGG_PATHWAY	ccad04622:RIG-I-like receptor signaling pathway	35	0.488622	0.0532411	OTUD5, DDX3X, NLRX1, TRADD, TANK, RELA, IFIH1, IKBKB, MAPK8, CASP8, TBK1, TKFC, TRIM25, RIPK1, IKBKG, FADD, AZI2, MAP3K7, ATG5, MAP3K1, CHUK, TRAF2, MAPK14, NFKB1, MAPK13, NFKBIA, CXCL10, CYLD, RNF125, ZNFX1, IRF3, TRAF6, IRF7, PIN1, NFKBIB	3140	88	10427	1.32073	1	0.128362	0.0809557
KEGG_PATHWAY	ccad04115:p53 signaling pathway	36	0.502583	0.0537012	STEAP3, SERPINE1, LOC122427080, PPM1D, RCHY1, BBC3, CCNB1, CCND3, COP1, CASP8, CCND2, SESN3, PPP1R13L, CASP3, SESN2, GTSE1, ZNF385A, SIVA1, APAF1, GADD45A, SIAH1, SHISA5, TSC2, TP53I3, CDK4, CCNE1, CCNG2, LOC122435411, BCL2, BAX, FAS, ATM, LOC122432087, TP53, TP73, ATR	3140	91	10427	1.31368	1	0.128591	0.0810997
GOTERM_BP_DIRECT	GO:0006612~protein targeting to membrane	16	0.22337	0.0538742	RTP4, LOC122454316, ZDHHC20, ZDHHC23, ZDHHC12, ZDHHC24, ZDHHC7, VPS37A, VPS37B, ZDHHC2, ZDHHC14, ZDHHC3, ZDHHC4, ZDHHC15, NACA, GOLGA7	5096	32	15999	1.56976	1	1	0.999221
KEGG_PATHWAY	ccad04613:Neutrophil extracellular trap formation	75	1.04705	0.0550133	ITGAM, NCF1, LOC122429327, HDAC11, NCF4, PIK3CD, ITGAL, ACTB, AKT2, AKT3, RAC2, AKT1, LOC122440602, LOC122423820, RAC1, MAP3K7, PRKCG, LOC122422040, VWF, SYK, PRKCB, PRKCA, LOC122429192, PIK3CA, HAT1, VDAC3, VDAC2, TLR8, TLR7, VDAC1, PADI4, LOC122430020, SLC25A5, RAF1, PLCB2, TLR4, TLR2, SLC25A6, LOC122430016, LOC122424251, HDAC2, LOC122430012, LOC122424255, HDAC1, SRC, LOC122430011, LOC122435269…	3140	209	10427	1.19164	1	0.130842	0.0825199
GOTERM_CC_DIRECT	GO:0000922~spindle pole	16	0.22337	0.0551798	PLK3, NUMA1, TUBGCP2, PLK2, CEP19, WDR73, CDC14A, CDC14B, LATS1, PSRC1, LATS2, SPATA17, TUBGCP5, UNC119, TUBGCP4, SPDL1	4744	33	15361	1.56993	1	0.909853	0.904948
KEGG_PATHWAY	ccad04350:TGF-beta signaling pathway	44	0.614268	0.0556159	HDAC2, BMPR2, NRROS, ROCK1, TFRC, HDAC1, HFE, ACVR1B, LTBP1, ACVR1C, SIN3A, PPP2R1A, EP300, E2F4, LOC122439581, SKIL, MAPK3, SKP1, ACVR1, TGIF1, SMAD2, CDKN2B, SMAD4, SMAD3, TGFB1, SMURF2, TGFB3, FST, EMP3, RGMB, RHOA, ACVR2A, TGFBR2, SMAD7, RBX1, SKI, RBL1, TFDP1, RPS6KB1, SP1, ID1, ID3, BMPR1B, BMPR1A	3140	115	10427	1.27053	1	0.131387	0.0828637
KEGG_PATHWAY	ccad05216:Thyroid cancer	20	0.279213	0.0563382	TCF7L2, GADD45A, TPM3, NCOA4, TCF7, LEF1, LOC122435468, NRAS, RXRA, TFG, PAX8, TPR, CCDC6, BAX, CTNNB1, KRAS, BAK1, TP53, HRAS, MAPK3	3140	45	10427	1.47587	1	0.131387	0.0828637
KEGG_PATHWAY	ccad04330:Notch signaling pathway	27	0.376937	0.0563622	NOTCH2, HDAC2, NOTCH1, MAML1, CTBP1, HDAC1, NOTCH4, LOC122432993, RBPJ, ATXN1, APH1B, HEY2, ATXN1L, EP300, CIR1, SPEN, PSENEN, TLE3, LOC122452850, DTX3L, TLE7, KAT2B, HEYL, ADAM17, ITCH, SNW1, MFNG	3140	65	10427	1.37937	1	0.131387	0.0828637
GOTERM_CC_DIRECT	GO:0031410~cytoplasmic vesicle	20	0.279213	0.057	LOC122434658, CD164L2, DENND4A, CAV1, LOC122432541, DENND4C, RHOG, TRAPPC8, FAM91A1, OCEL1, TMEM198, AMOT, AP4M1, TMEM123, SNX18, OCLN, RUSC1, SNX9, RAC1, AGFG1	4744	44	15361	1.47181	1	0.919435	0.914479
GOTERM_BP_DIRECT	GO:0051016~barbed-end actin filament capping	10	0.139606	0.0577078	SVIL, SCIN, GSN, CAPZB, CAPZA1, CAPZA2, TWF2, ADD3, ADD1, ADD2	5096	17	15999	1.84678	1	1	0.999221
GOTERM_BP_DIRECT	GO:0032456~endocytic recycling	10	0.139606	0.0577078	SNX3, ARL4C, RAB14, RAB35, WIPF3, SNX12, WASHC1, RAB11FIP3, RAB11FIP4, VPS35L	5096	17	15999	1.84678	1	1	0.999221
GOTERM_BP_DIRECT	GO:0002476~antigen processing and presentation of endogenous peptide antigen via MHC class Ib	12	0.167528	0.0582227	LOC122429598, LOC122429686, LOC122429597, LOC122429596, LOC122433865, LOC122429603, LOC122429624, LOC122433873, HFE, LOC122429593, LOC122429691, LOC122433858	5096	22	15999	1.71247	1	1	0.999221
GOTERM_BP_DIRECT	GO:0006368~transcription elongation by RNA polymerase II	12	0.167528	0.0582227	POLR2M, PCID2, SUPT16H, LOC122455291, ELOA, TCEA1, PAF1, ELOB, SUPT5H, SUPT6H, CDC73, ELL3	5096	22	15999	1.71247	1	1	0.999221
GOTERM_BP_DIRECT	GO:0002486~antigen processing and presentation of endogenous peptide antigen via MHC class I via ER pathway, TAP-independent	12	0.167528	0.0582227	LOC122429598, LOC122429686, LOC122429597, LOC122429596, LOC122433865, LOC122429603, LOC122429624, LOC122433873, HFE, LOC122429593, LOC122429691, LOC122433858	5096	22	15999	1.71247	1	1	0.999221
GOTERM_MF_DIRECT	GO:0051010~microtubule plus-end binding	7	0.0977244	0.0582478	CLIP3, CLIP2, CLIP1, CLIP4, TBCB, MAPRE1, MAPRE2	5161	10	16442	2.23007	1	1	0.991746
GOTERM_MF_DIRECT	GO:0003756~protein disulfide isomerase activity	7	0.0977244	0.0582478	PDIA3, TMX3, QSOX1, P4HB, PDIA6, PDIA4, TXNDC5	5161	10	16442	2.23007	1	1	0.991746
GOTERM_CC_DIRECT	GO:0005885~Arp2/3 protein complex	9	0.125646	0.0585366	ACTR3, LOC122435083, ACTR2, LOC122424660, ARPC2, ARPC1B, ARPC1A, ARPC4, ARPC5	4744	15	15361	1.94279	1	0.924132	0.91915
GOTERM_CC_DIRECT	GO:0005769~early endosome	21	0.293173	0.0601111	RUBCN, PXK, ANKRD27, PARM1, PPP1R21, MGRN1, USP10, LOC122432783, WIPF3, LOC122435798, RCSD1, CLCN3, EEA1, CLCN4, INPP5F, SNX27, SNX17, TMEM108, LDLRAP1, WASHC1, PLEKHJ1	4744	47	15361	1.44676	1	0.929217	0.924208
GOTERM_BP_DIRECT	GO:0006887~exocytosis	20	0.279213	0.0602392	EXOC8, WIPF3, SNAP23, TNFAIP2, SYTL1, SYTL4, STX11, SYTL3, SYTL2, EXOC3, STX4, EXOC6, EXOC5, STXBP6, WASHC1, SNAP29, EXOC2, EXOC1, WASHC3, CDK16	5096	43	15999	1.46024	1	1	0.999221
KEGG_PATHWAY	ccad00450:Selenocompound metabolism	10	0.139606	0.0606432	SEPSECS, TXNRD3, TXNRD2, TXNRD1, MARS2, MARS1, SCLY, SEPHS1, PAPSS2, PAPSS1	3140	18	10427	1.84483	1	0.140437	0.088571
GOTERM_MF_DIRECT	GO:0031492~nucleosomal DNA binding	13	0.181488	0.0608521	SMARCE1, SMARCC1, SMARCC2, LOC122426643, LOC122423454, LOC122445262, LOC122427196, LOC122429175, HMGN4, LOC122455070, HMGN5, LOC122425754, HMGN3	5161	25	16442	1.65662	1	1	0.991746
KEGG_PATHWAY	ccad05134:Legionellosis	34	0.474661	0.0615576	HBS1L, RAB1A, LOC122430139, ITGAM, SAR1A, RAB1B, LOC122423465, LOC122424037, LOC122428193, LOC122436414, LOC122428192, RELA, HSPD1, BCL2L13, CASP7, CASP8, CASP3, LOC122455175, LOC122427624, LOC122433435, APAF1, HSPA6, CLK4, NFKB1, NFKB2, EEF1G, EEF1A1, NFKBIA, LOC122423875, LOC122430141, SEC22B, TLR4, MYD88, TLR2	3140	86	10427	1.31284	1	0.141623	0.0893189
GOTERM_MF_DIRECT	GO:0000049~tRNA binding	19	0.265252	0.0620169	TRMT10A, PTCD1, TRMT10C, KARS1, NSUN2, ELP1, YARS1, FARS2, TRMT9B, DUS2, AIMP1, SEPSECS, SARS1, DALRD3, SARS2, XPOT, C28H6ORF52, IARS1, LOC122421547	5161	41	16442	1.47635	1	1	0.991746
GOTERM_BP_DIRECT	GO:0006646~phosphatidylethanolamine biosynthetic process	7	0.0977244	0.0622715	SLC27A1, CHKB, CHKA, ETNK1, CHPT1, CEPT1, PISD	5096	10	15999	2.19766	1	1	0.999221
GOTERM_BP_DIRECT	GO:0070936~protein K48-linked ubiquitination	7	0.0977244	0.0622715	ITCH, RNF34, AMFR, FBXO38, UBE2D2, PELI1, RFFL	5096	10	15999	2.19766	1	1	0.999221
GOTERM_BP_DIRECT	GO:0006614~SRP-dependent cotranslational protein targeting to membrane	7	0.0977244	0.0622715	SRP19, SRP72, SRP54, SRPRA, SRP68, SRP14, SEC63	5096	10	15999	2.19766	1	1	0.999221
GOTERM_BP_DIRECT	GO:0006482~protein demethylation	7	0.0977244	0.0622715	LOC122432977, PHF2, KDM2A, ALKBH4, PPME1, KDM7A, PHF8	5096	10	15999	2.19766	1	1	0.999221
GOTERM_BP_DIRECT	GO:0045595~regulation of cell differentiation	7	0.0977244	0.0622715	CEBPB, APC, PLEKHB2, RUNX3, RUNX2, PTBP3, RUNX1	5096	10	15999	2.19766	1	1	0.999221
KEGG_PATHWAY	ccad04657:IL-17 signaling pathway	37	0.516543	0.0626181	CEBPB, HSP90AB1, TRAF3IP2, TRADD, SRSF1, LOC122449754, TNFAIP3, LOC122428192, RELA, HSP90B1, IKBKB, MAPK8, CASP8, TBK1, CASP3, LOC122435267, IKBKG, FADD, MAPK6, MAP3K7, MAPK3, USP25, HSP90AA1, LOC122432323, CHUK, TRAF2, MAPK14, NFKB1, MAPK13, NFKBIA, CXCL10, TRAF6, TAB3, TAB2, LOC122421313, S100A9, S100A8	3140	95	10427	1.29333	1	0.143127	0.0902677
GOTERM_BP_DIRECT	GO:0018105~peptidyl-serine phosphorylation	28	0.390898	0.0631011	DYRK3, MAST4, IKBKB, TBK1, STK35, STK38, TLK2, STK38L, TLK1, LOC122423369, PRKACA, CSNK1G3, CHUK, PDPK1, CSNK1A1, DYRK1A, VRK1, HIPK1, VRK3, HIPK3, LATS1, LATS2, MAPKAPK3, PRKCQ, MAPKAPK5, ULK1, CAMK1, CSNK1G1	5096	65	15999	1.35241	1	1	0.999221
GOTERM_CC_DIRECT	GO:0034045~phagophore assembly site membrane	6	0.0837638	0.0650122	LOC122420655, WDR45B, RB1CC1, WIPI1, WIPI2, ATG5	4744	8	15361	2.42849	1	0.977769	0.972498
GOTERM_CC_DIRECT	GO:0042613~MHC class II protein complex	12	0.167528	0.0658874	LOC122429367, LOC122429640, LOC122429860, LOC122429977, LOC122429976, LOC122429717, LOC122429360, LOC122429902, LOC122429978, LOC122429364, LOC122429718, LOC122429361	4744	23	15361	1.68938	1	0.977769	0.972498
GOTERM_BP_DIRECT	GO:0006334~nucleosome assembly	25	0.349016	0.0661573	SET, HP1BP3, SPTY2D1, LOC122423820, TSPYL2, SHPRH, TSPYL1, LOC122423454, LOC122421330, NAP1L3, NAP1L1, LOC122429171, LOC122429192, LOC122429176, LOC122429175, NAP1L4, H1-2, H1-5, H1-4, H1-6, KAT6B, KAT6A, LOC122424467, LOC122430020, TSPYL4	5096	57	15999	1.37698	1	1	0.999221
GOTERM_BP_DIRECT	GO:0030036~actin cytoskeleton organization	34	0.474661	0.0665104	TGFB1I1, ARHGEF10L, AMOT, SPTA1, PDLIM1, PDLIM2, CAPZB, PACSIN2, FLNA, PHACTR2, LOC122422159, FLNB, PDLIM5, WASF2, SPTAN1, PDLIM7, SPTBN1, SPTBN2, SPECC1, ARHGEF10, ACTN3, IQSEC2, STARD8, ACTN4, SSH2, SSH3, DIAPH2, INF2, DAAM2, DLC1, CAPZA1, CAPZA2, DOCK2, PFN1	5096	82	15999	1.30175	1	1	0.999221
KEGG_PATHWAY	ccad04216:Ferroptosis	27	0.376937	0.0671842	STEAP3, LOC122427221, TFRC, LOC122435269, SLC40A1, SLC3A2, SAT1, MAP1LC3B, FTH1, PCBP1, PCBP2, HMOX1, SLC39A8, ATG7, ATG5, ACSL1, LOC122426323, NCOA4, ACSL4, ACSL3, SLC39A14, GCLC, VDAC3, VDAC2, LOC122427539, TP53, FTL	3140	66	10427	1.35847	1	0.152573	0.0962251
GOTERM_CC_DIRECT	GO:0031201~SNARE complex	19	0.265252	0.0675549	STX12, STX16, STX7, STX18, GOSR1, CPLX1, BET1L, STX11, NAPG, BNIP1, VTI1A, STX5, VAMP1, STXBP5, STX4, STX3, SEC22B, SNAP29, VAMP2	4744	42	15361	1.4648	1	0.982857	0.977559
GOTERM_MF_DIRECT	GO:0043022~ribosome binding	14	0.195449	0.0681963	EIF5A, EFL1, EIF5A2, GTPBP6, MAIP1, LETM1, SEC61A1, SRP72, EIF3K, RACK1, LETMD1, ZNF598, SHFL, CPEB4	5161	28	16442	1.59291	1	1	0.991746
GOTERM_MF_DIRECT	GO:0016538~cyclin-dependent protein serine/threonine kinase regulator activity	14	0.195449	0.0681963	CCNI, CCNC, CCNA2, CCNB3, CCNB1, CCND3, CCND2, CCNE1, CCNG2, LOC122435411, CCNL1, CCNQ, CNPPD1, CCNO	5161	28	16442	1.59291	1	1	0.991746
GOTERM_BP_DIRECT	GO:0008333~endosome to lysosome transport	9	0.125646	0.0692185	UEVLD, RAB32, PXK, TSG101, SNAPIN, MGRN1, CLEC16A, RAB7B, RAB7A	5096	15	15999	1.88371	1	1	0.999221
GOTERM_BP_DIRECT	GO:0019752~carboxylic acid metabolic process	9	0.125646	0.0692185	UEVLD, LDHB, LOC122430777, SGPL1, PDXDC1, LOC122433908, CSAD, LOC122422755, LOC122430778	5096	15	15999	1.88371	1	1	0.999221
GOTERM_BP_DIRECT	GO:0022008~neurogenesis	9	0.125646	0.0692185	NAV3, BTBD1, BTBD3, LPAR1, CXCR4, NAV2, WDR62, VXN, TRAK2	5096	15	15999	1.88371	1	1	0.999221
GOTERM_BP_DIRECT	GO:0042744~hydrogen peroxide catabolic process	11	0.153567	0.0696771	LOC122450619, PRDX5, GPX1, PRDX4, GPX3, PRDX1, LOC122450614, LOC122450616, LOC122433251, LOC122433250, LOC122450618	5096	20	15999	1.72674	1	1	0.999221
GOTERM_CC_DIRECT	GO:0030479~actin cortical patch	10	0.139606	0.070254	LOC122426540, ACTR3, ACTR2, LOC122424660, GMFB, BIN3, CAPZA1, CFL1, CAPZA2, LOC122426558	4744	18	15361	1.79888	1	1	0.995951
GOTERM_BP_DIRECT	GO:0007219~Notch signaling pathway	16	0.22337	0.0705218	NOTCH2, NOTCH1, DTX3L, MAML1, NOTCH4, LOC122432993, ADAM10, RBPJ, NLE1, TRAF7, HEYL, ADAM17, APH1B, POFUT1, HEY2, SUSD5	5096	33	15999	1.52219	1	1	0.999221
GOTERM_CC_DIRECT	GO:0016514~SWI/SNF complex	8	0.111685	0.0717828	SMARCE1, SMARCD1, SMARCC1, LOC122455070, SMARCD2, SMARCC2, BICRAL, ARID1A	4744	13	15361	1.99261	1	1	0.995951
KEGG_PATHWAY	ccad04022:cGMP-PKG signaling pathway	64	0.89348	0.0723812	ATF2, PDE3B, ATP2A2, ATP2A1, IRS2, SLC8A1, PPP1CC, PPP3CA, RGS2, PPP3CB, PPP3CC, EDNRB, LOC122420753, AKT2, AKT3, CREB3L2, CNGA1, AKT1, GTF2I, MEF2A, TRPC6, PPP1R12A, RHOA, ADRA2A, LOC122445547, ADCY9, KCNMA1, VDAC3, VDAC2, PDE5A, VDAC1, SLC25A5, RAF1, PLCB2, ATF4, CREB5, SLC25A6, ATF6B, ROCK1, ROCK2, SRF, NPR2, GNAI3, ITPR2, CACNA1C, ADCY7, LOC122432714, GNAI1, PIK3R5, GNAI2, GNA13, PPP3R1, GNA1…	3140	178	10427	1.19396	1	0.163322	0.103004
GOTERM_MF_DIRECT	GO:0005164~tumor necrosis factor receptor binding	12	0.167528	0.0732175	CD40LG, TNFSF14, TRAF6, TNFSF12, TNFSF10, TNFSF9, TRIM37, FASLG, TRAF2, TNFSF8, TRAF1, LTB	5161	23	16442	1.66217	1	1	0.991746
GOTERM_MF_DIRECT	GO:0061631~ubiquitin conjugating enzyme activity	12	0.167528	0.0732175	UBE2H, UBE2R2, UBE2D4, LOC122432588, UBE2E3, UBE2D2, UBE2D3, UBE2E1, LOC122431671, UBE2G1, UBE2A, UBE2Z	5161	23	16442	1.66217	1	1	0.991746
GOTERM_MF_DIRECT	GO:0023026~MHC class II protein complex binding	12	0.167528	0.0732175	LOC122429367, LOC122429640, LOC122429860, LOC122429977, LOC122429976, LOC122429717, LOC122429360, LOC122429902, LOC122429978, LOC122429364, LOC122429718, LOC122429361	5161	23	16442	1.66217	1	1	0.991746
GOTERM_CC_DIRECT	GO:0008305~integrin complex	13	0.181488	0.0732625	ITGB1, ITGAM, ITGA4, ITGA2, ITGA1, ITGAL, LOC122433255, ITGA7, ITGA6, ITGB7, ITGAV, ITGA5, ITGA9	4744	26	15361	1.61899	1	1	0.995951
GOTERM_MF_DIRECT	GO:0003779~actin binding	40	0.558425	0.0734641	PXK, GMFB, TLNRD1, EPB41, WIPF1, LOC122434313, TGFB1I1, WIPF3, WAS, LSP1, PDLIM1, PDLIM2, ALKBH4, EPB41L1, EPB41L2, EPB41L3, PHACTR2, PHACTR1, WHAMM, PDLIM5, WASHC1, WASF2, PDLIM7, RDX, MSN, SSH2, FHDC1, SSH3, MTSS1, DIAPH2, INF2, SPATA32, DAAM2, SPIRE2, SPIRE1, EVL, NF2, PFN1, EZR, RAI14	5161	101	16442	1.26171	1	1	0.991746
KEGG_PATHWAY	ccad01210:2-Oxocarboxylic acid metabolism	16	0.22337	0.0746887	BCKDHA, GOT1L1, IDH3G, IDH1, GPT2, GOT2, BCKDHB, IDH2, PDHB, CS, DBT, LOC122435300, DLAT, BCAT1, BCAT2, IDH3A	3140	35	10427	1.51803	1	0.167455	0.105611
GOTERM_CC_DIRECT	GO:0005635~nuclear envelope	17	0.237331	0.0759602	POLR2M, PARP6, SUN2, SUN1, IPO11, SPAG4, TOR1B, IPO7, MTMR6, PARP8, PLPP7, LOC122420205, IPO8, NEMP2, ALOX5, NEMP1, EMD	4744	37	15361	1.48772	1	1	0.995951
GOTERM_BP_DIRECT	GO:0042147~retrograde transport, endosome to Golgi	17	0.237331	0.0767356	TMEM87A, RIC1, SLC66A2, GOLT1B, LOC122432783, WIPF3, VPS26B, RCSD1, BET1L, RGP1, HEATR5A, HEATR5B, VPS53, VTI1A, VPS35, WASHC1, PLEKHJ1	5096	36	15999	1.48255	1	1	0.999221
GOTERM_MF_DIRECT	GO:0003712~transcription coregulator activity	35	0.488622	0.0773995	TCERG1, LOC122432977, PHF2, KDM3A, KDM3B, NAB1, NAB2, JMJD1C, HR, LOC122432738, MED17, PHF8, BCLAF3, BCLAF1, MED14, MED13, MED10, SAP30L, NRIP1, ZXDC, LOC122435265, YAF2, PIAS4, AKIRIN2, TAF15, KDM2A, LOC122435217, FUS, HMGA1, LOC122449683, MED29, THRAP3, MED21, HDGFL3, KDM7A	5161	87	16442	1.28165	1	1	0.991746
KEGG_PATHWAY	ccad01212:Fatty acid metabolism	25	0.349016	0.0775303	ACAA2, TECR, HACD3, ACAT2, FADS2, SCP2, HTD2, HADH, ACAA1, CBR4, FADS1, CPT1A, ELOVL4, ACSL1, OXSM, ACSL4, ACSL3, CPT1C, MCAT, ACSF3, SCD, EHHADH, PPT1, ACOX3, PPT2	3140	61	10427	1.36094	1	0.172726	0.108935
GOTERM_CC_DIRECT	GO:0035098~ESC/E(Z) complex	5	0.0698032	0.07761	SUZ12, RBBP4, AEBP2, EED, RBBP7	4744	6	15361	2.69832	1	1	0.995951
GOTERM_MF_DIRECT	GO:0008253~5'-nucleotidase activity	8	0.111685	0.0776905	NT5C, NT5DC1, NT5C3B, NT5E, NT5DC2, NT5DC3, NT5M, NT5C2	5161	13	16442	1.9605	1	1	0.991746
GOTERM_CC_DIRECT	GO:0005886~plasma membrane	453	6.32417	0.0800399	PI4K2B, LOC122434313, ITSN1, RAPH1, SLC4A1, SLC4A2, SLC4A4, CNST, HTR7, ALCAM, MS4A18, SCN11A, LOC122455131, TMEM8B, LOC122455025, LOC122455026, LOC122455027, LOC122455028, SYTL1, SYTL4, SYTL3, SYTL2, BIN2, BIN1, CLNS1A, GPR160, SKAP1, LOC122421239, PI4K2A, LRPAP1, TTYH3, TTYH2, TTYH1, LOC122424894, LOC122420173, SLC5A1, SLC5A2, SLC5A3, RIC8A, RIC8B, EPB41L1, LOC122420178, EPB41L2, EPB41L3, LOC12…	4744	1388	15361	1.05678	1	1	0.995951
GOTERM_BP_DIRECT	GO:0002503~peptide antigen assembly with MHC class II protein complex	12	0.167528	0.0803892	LOC122429367, LOC122429640, LOC122429860, LOC122429977, LOC122429976, LOC122429717, LOC122429360, LOC122429902, LOC122429978, LOC122429364, LOC122429718, LOC122429361	5096	23	15999	1.63801	1	1	0.999221
GOTERM_BP_DIRECT	GO:0002381~immunoglobulin production involved in immunoglobulin-mediated immune response	12	0.167528	0.0803892	LOC122429367, LOC122429640, LOC122429860, LOC122429977, LOC122429976, LOC122429717, LOC122429360, LOC122429902, LOC122429978, LOC122429364, LOC122429718, LOC122429361	5096	23	15999	1.63801	1	1	0.999221
KEGG_PATHWAY	ccad04151:PI3K-Akt signaling pathway	138	1.92657	0.081486	LOC122425560, ATF2, LOC122429249, PPP2R2A, IGF1R, CCND3, CCND2, PPP2R1A, AKT2, MYB, CREB3L2, AKT3, AKT1, IL6R, IFNAR2, PDGFRB, MAGI1, IL4R, HGF, RPS6, F2R, TSC2, FLT3LG, TSC1, PRKCA, CCNE1, COL4A1, DDIT4, COL4A3, MTCP1, RAF1, TP53, LOC122454175, IFNAR1, ATF4, EPHA2, LPAR1, TGFA, LOC122427080, PIK3R1, FOXO3, HSP90B1, PIK3R5, GNG10, PDGFD, CD19, EIF4EBP1, THEM4, LOC122435267, FGF23, MCL1, PCK2, NGF…	3140	411	10427	1.11498	1	0.180397	0.113773
GOTERM_MF_DIRECT	GO:0000149~SNARE binding	20	0.279213	0.0818358	UVRAG, STX12, SEC24B, SNAPIN, ANKRD27, STX16, STX7, TNFAIP2, SYT9, STX11, SYT7, SYT12, VTI1A, STX5, EXOC3, STX4, STX3, SEC24D, SEC24C, PICALM	5161	45	16442	1.41592	1	1	0.991746
GOTERM_MF_DIRECT	GO:0032396~inhibitory MHC class I receptor activity	5	0.0698032	0.0819574	LOC122421171, LOC122421184, LOC122421511, LILRA5, LOC122421229	5161	6	16442	2.65485	1	1	0.991746
GOTERM_MF_DIRECT	GO:0008519~ammonium channel activity	5	0.0698032	0.0819574	SLC12A2, RHAG, RHBG, RHCE, AQP1	5161	6	16442	2.65485	1	1	0.991746
GOTERM_BP_DIRECT	GO:0006367~transcription initiation at RNA polymerase II promoter	15	0.209409	0.0833014	BRF2, TAF10, LOC122436515, GTF2E1, GTF2E2, GTF2H5, TAF6L, ERCC3, TAF8, TAF4B, TAF7, TAF6, POLR2I, LOC122441658, TAF2	5096	31	15999	1.51912	1	1	0.999221
GOTERM_BP_DIRECT	GO:0006882~intracellular zinc ion homeostasis	8	0.111685	0.0833621	SLC30A7, SLC30A5, SLC39A6, SLC39A10, SLC39A13, SLC39A8, SLC39A7, SLC39A14	5096	13	15999	1.93201	1	1	0.999221
GOTERM_BP_DIRECT	GO:0097190~apoptotic signaling pathway	8	0.111685	0.0833621	LOC122419678, IFI27L2, TFPT, APAF1, TM2D1, DAPL1, LOC122454843, IFI6	5096	13	15999	1.93201	1	1	0.999221
GOTERM_BP_DIRECT	GO:0046777~protein autophosphorylation	10	0.139606	0.0836696	STK35, MAPKAPK3, DYRK1A, PIM1, PIM3, MAPKAPK5, ULK1, PIM2, MAP3K12, IGF1R	5096	18	15999	1.74418	1	1	0.999221
GOTERM_BP_DIRECT	GO:0008630~intrinsic apoptotic signaling pathway in response to DNA damage	10	0.139606	0.0836696	BCL2A1, LOC122454842, BCL2, BAX, LOC122423425, BAK1, TNFRSF1B, CRIP1, PML, MCL1	5096	18	15999	1.74418	1	1	0.999221
GOTERM_CC_DIRECT	GO:0005681~spliceosomal complex	19	0.265252	0.083743	ZRSR2, LOC122454520, GPKOW, LOC122430561, GEMIN2, CDC5L, U2AF1, U2AF1L4, SRRM1, RBM3, SNW1, ZMAT2, CLNS1A, TRA2A, DHX15, DHX38, LOC122432056, TXNL4A, RBMX	4744	43	15361	1.43074	1	1	0.995951
GOTERM_BP_DIRECT	GO:0043065~positive regulation of apoptotic process	22	0.307134	0.0841072	MTCH1, BNIP3L, BCL2A1, DAPK1, HTRA4, PAWR, DUSP6, BBC3, LOC122430769, LATS1, TFPT, LATS2, STK17A, STK17B, CASP3, BAX, MAP3K10, LOC122429726, LOC122431063, LOC122432087, MAP3K11, MCL1	5096	50	15999	1.38139	1	1	0.999221
GOTERM_BP_DIRECT	GO:1902966~positive regulation of protein localization to early endosome	5	0.0698032	0.0860581	LOC122434313, RDX, MSN, NF2, EZR	5096	6	15999	2.61627	1	1	0.999221
GOTERM_BP_DIRECT	GO:2000643~positive regulation of early endosome to late endosome transport	5	0.0698032	0.0860581	LOC122434313, RDX, MSN, NF2, EZR	5096	6	15999	2.61627	1	1	0.999221
GOTERM_BP_DIRECT	GO:0048193~Golgi vesicle transport	5	0.0698032	0.0860581	GOLGA4, STX6, SPIRE2, SPIRE1, STX10	5096	6	15999	2.61627	1	1	0.999221
GOTERM_BP_DIRECT	GO:0033173~calcineurin-NFAT signaling cascade	5	0.0698032	0.0860581	PPP3CA, NFAT5, NFATC3, NFATC2, NFATC1	5096	6	15999	2.61627	1	1	0.999221
GOTERM_BP_DIRECT	GO:1902115~regulation of organelle assembly	5	0.0698032	0.0860581	LOC122434313, RDX, MSN, NF2, EZR	5096	6	15999	2.61627	1	1	0.999221
GOTERM_CC_DIRECT	GO:0000159~protein phosphatase type 2A complex	9	0.125646	0.0862243	PTPA, LOC122434723, PPP2R1A, LOC122429249, PPP2R5B, PPP2R5A, PPP2R2A, PPP2R5C, LOC122454175	4744	16	15361	1.82137	1	1	0.995951
GOTERM_CC_DIRECT	GO:0005622~intracellular anatomical structure	20	0.279213	0.0870527	POLR2M, LOC122428300, PARP6, DHX9, TALDO1, ARHGAP17, PARP8, DHX40, LOC122420205, DHX30, DHX33, SH3BP1, DHX34, ABI1, DHX15, DHX38, DHX16, DHX29, CAMK1, SNTB1	4744	46	15361	1.40782	1	1	0.995951
GOTERM_BP_DIRECT	GO:0015031~protein transport	19	0.265252	0.0878069	LOC122425483, ARRDC4, TSG101, IST1, ARRDC3, RRBP1, SCAMP1, SNX20, SCAMP3, SCAMP2, UEVLD, SNX4, SNX18, CHMP1B, CHMP1A, CHMP2B, CHMP2A, AP4S1, ARL8B	5096	42	15999	1.42026	1	1	0.999221
GOTERM_BP_DIRECT	GO:0045893~positive regulation of DNA-templated transcription	33	0.460701	0.0879048	RNF13, WBP2, KMT2B, CXXC1, ING5, ING2, LOC122455070, MSANTD1, NUP85, TBX21, RPS6KA1, TP53INP1, GPBP1, LOC122441558, YAF2, RNF111, TRIM45, CDK5RAP2, EOMES, SMARCC1, SMARCC2, BICRAL, EAF1, TFEB, DYRK1A, TRIP4, ARID1A, TBX19, TBX18, PML, RNF167, LOC122454452, TRIM56	5096	81	15999	1.27906	1	1	0.999221
GOTERM_BP_DIRECT	GO:0006351~DNA-templated transcription	23	0.321095	0.0880815	PHF3, CEBPA, CEBPB, LOC122454266, CEBPG, LIN9, SPOCD1, POLR3A, POLR1A, POLR2B, POLR2C, POLR1C, GPBP1, TCEANC2, TCEA1, POLR2F, TAF4B, HOXC9, POLR1H, LOC122454452, LOC122441558, POLR2I, POLR3K	5096	53	15999	1.36243	1	1	0.999221
GOTERM_MF_DIRECT	GO:0097602~cullin family protein binding	11	0.153567	0.0883428	KLHL9, DCUN1D3, DCUN1D4, DCUN1D1, CCDC22, KLHL13, KCTD17, KCTD5, KCTD6, SKP1, RBX1	5161	21	16442	1.66876	1	1	0.991746
GOTERM_CC_DIRECT	GO:0005856~cytoskeleton	40	0.558425	0.088387	KANK1, LOC122434658, ROCK1, ROCK2, EPB41, LOC122434313, PTPN21, ADD3, ADD1, ADD2, EPB41L5, EPB41L1, EPB41L2, EPB41L3, KRIT1, PTK2B, NPHP4, RAC1, JAK2, WASF2, JAK1, MYO10, DST, DMPK, CDC42BPG, RDX, RHOG, MYO7B, MSN, FRMD4B, TYK2, PTPN13, PTK2, FRMD6, FRMD8, EVL, NF2, TLN1, EZR, PLEC	4744	104	15361	1.24538	1	1	0.995951
KEGG_PATHWAY	ccad00600:Sphingolipid metabolism	23	0.321095	0.0896692	ARSA, CERS5, ASAH1, CERS6, CERK, SGMS1, LOC122454606, LOC122454605, SGMS2, SMPD3, GALC, SMPD2, NEU3, UGCG, SGPL1, SPTLC2, GLB1, SMPD1, DEGS1, KDSR, B4GALT6, PLPP3, PLPP1	3140	56	10427	1.36386	1	0.197272	0.124416
GOTERM_CC_DIRECT	GO:0005869~dynactin complex	4	0.0558425	0.0904542	DCTN6, DCTN2, DCTN4, DCTN3	4744	4	15361	3.23798	1	1	0.995951
GOTERM_CC_DIRECT	GO:0071564~npBAF complex	4	0.0558425	0.0904542	SMARCC1, LOC122455070, SMARCC2, PHF10	4744	4	15361	3.23798	1	1	0.995951
GOTERM_MF_DIRECT	GO:0004197~cysteine-type endopeptidase activity	23	0.321095	0.0924308	USP46, USP35, USP47, USP25, USP48, USP7, USP42, LOC122423793, USP9X, USP10, USP34, USP12, CTSW, CFLAR, CTSV, MALT1, CTSO, CASP8, ESPL1, CTSH, CTSF, CTSC, LGMN	5161	54	16442	1.35692	1	1	0.991746
GOTERM_BP_DIRECT	GO:0001817~regulation of cytokine production	20	0.279213	0.0927359	LOC122429994, ZBTB17, MOG, ZBTB49, BTN1A1, ZBTB16, LOC122420143, BTN3A3, ZBTB11, LITAF, LOC122420513, ZNF37A, LOC122440466, LOC122420023, ZNF789, LOC122424239, ZNF787, PATZ1, ZNF641, GZF1	5096	45	15999	1.39534	1	1	0.999221
KEGG_PATHWAY	ccad03020:RNA polymerase	16	0.22337	0.0936376	POLR2M, POLR3GL, POLR3A, POLR2A, POLR1A, POLR2B, POLR3D, POLR2C, POLR1C, POLR2F, POLR1G, POLR1H, POLR2I, POLR3K, POLR2J, POLR2L	3140	36	10427	1.47587	1	0.203816	0.128543
GOTERM_MF_DIRECT	GO:0032266~phosphatidylinositol-3-phosphate binding	9	0.125646	0.0937015	SNX3, LOC122420655, ZFYVE26, SNX27, WDR45B, PLEKHA5, SNX12, WIPI1, WIPI2	5161	16	16442	1.79202	1	1	0.991746
GOTERM_MF_DIRECT	GO:0140326~ATPase-coupled intramembrane lipid transporter activity	9	0.125646	0.0937015	ATP8B4, ATP8A1, ATP8B1, ATP10D, ATP11C, ATP11B, ATP10A, ATP11A, ATP9B	5161	16	16442	1.79202	1	1	0.991746
GOTERM_MF_DIRECT	GO:0043539~protein serine/threonine kinase activator activity	9	0.125646	0.0937015	PARP6, LOC122420205, CAB39, CAB39L, STRADA, STRADB, MTCP1, RICTOR, PARP8	5161	16	16442	1.79202	1	1	0.991746
GOTERM_BP_DIRECT	GO:0007165~signal transduction	117	1.63339	0.0937474	FAM13B, ARAF, RAPH1, ARHGAP35, SYDE1, ARHGAP42, RASSF2, RGS3, RASSF3, OPHN1, SIT1, RASSF4, RASSF5, TOM1, TNFRSF8, OSTF1, CCN2, MAGI1, CSNK1G3, IL1R1, MAGI3, STARD8, THOC1, VRK1, OLFM4, VRK3, PRKAB1, ANK1, SIGIRR, TOM1L1, TOM1L2, OLFM1, ULK1, RIN3, RAF1, STAM2, RIN2, PLPP1, CSNK1G1, BEX2, NDRG4, CHRNA9, ARHGAP18, ARHGAP17, ARHGAP12, SCUBE2, LOC122444987, SCUBE3, ARHGAP20, SCUBE1, LOC122420213, GRK…	5096	328	15999	1.11989	1	1	0.999221
KEGG_PATHWAY	ccad05218:Melanoma	29	0.404858	0.0938017	RB1, ARAF, PIK3CD, LOC122427080, PIK3R1, IGF1R, NRAS, AKT2, PDGFD, AKT3, AKT1, E2F2, E2F3, BAK1, FGF23, HRAS, MAPK3, PDGFRB, GADD45A, BAD, HGF, MITF, PIK3CA, CDK4, BAX, KRAS, RAF1, MET, TP53	3140	74	10427	1.30136	1	0.203816	0.128543
GOTERM_MF_DIRECT	GO:0008506~sucrose:proton symporter activity	4	0.0558425	0.0945094	SLC45A4, SLC45A2, SLC45A3, SLC45A1	5161	4	16442	3.18582	1	1	0.991746
GOTERM_MF_DIRECT	GO:0004527~exonuclease activity	4	0.0558425	0.0945094	ISG20, REXO1, AEN, REXO5	5161	4	16442	3.18582	1	1	0.991746
GOTERM_MF_DIRECT	GO:0004711~ribosomal protein S6 kinase activity	4	0.0558425	0.0945094	RPS6KA3, RPS6KA6, RPS6KA2, RPS6KA1	5161	4	16442	3.18582	1	1	0.991746
GOTERM_MF_DIRECT	GO:0004709~MAP kinase kinase kinase activity	4	0.0558425	0.0945094	MAP3K15, MAP3K6, MAP3K7, MAP3K5	5161	4	16442	3.18582	1	1	0.991746
GOTERM_MF_DIRECT	GO:0032452~histone demethylase activity	7	0.0977244	0.0948522	LOC122432977, PHF2, KDM5C, KDM2A, JARID2, KDM7A, PHF8	5161	11	16442	2.02734	1	1	0.991746
GOTERM_CC_DIRECT	GO:0035861~site of double-strand break	13	0.181488	0.0960397	LOC122424372, STN1, PARP3, SLF2, ZGRF1, RPA2, SMC6, DDB1, RNF169, WDR70, SHLD2, SHLD1, POLH	4744	27	15361	1.55903	1	1	0.995951
GOTERM_CC_DIRECT	GO:0030027~lamellipodium	13	0.181488	0.0960397	LOC122426540, LOC122428300, CARMIL1, DBNL, FAM89B, AMOT, ABITRAM, ABI2, CDH2, CFL1, ABI1, PDPN, LOC122426558	4744	27	15361	1.55903	1	1	0.995951
GOTERM_BP_DIRECT	GO:0006897~endocytosis	21	0.293173	0.0973057	CSNK1G3, RALBP1, CLINT1, C9ORF72, EPN1, EEA1, NCKIPSD, EHD2, SNX18, NECAP2, BIN3, HEATR5A, HEATR5B, REPS2, LOC122423369, SNX9, PIK3C3, ATP9B, EPS15, CSNK1G1, REPS1	5096	48	15999	1.37354	1	1	0.999221
GOTERM_MF_DIRECT	GO:0003950~NAD+ ADP-ribosyltransferase activity	12	0.167528	0.0980696	LOC122424372, PARP6, LOC122420205, PARP3, PARP1, TNKS2, PARP2, TNKS, ZC3HAV1, ART3, ART4, PARP8	5161	24	16442	1.59291	1	1	0.991746
GOTERM_BP_DIRECT	GO:0006048~UDP-N-acetylglucosamine biosynthetic process	4	0.0558425	0.0983034	UAP1L1, PGM3, GNPNAT1, UAP1	5096	4	15999	3.13952	1	1	0.999221
GOTERM_BP_DIRECT	GO:0030242~autophagy of peroxisome	4	0.0558425	0.0983034	ACBD5, RB1CC1, PIK3R4, PIK3C3	5096	4	15999	3.13952	1	1	0.999221
GOTERM_BP_DIRECT	GO:0071596~ubiquitin-dependent protein catabolic process via the N-end rule pathway	4	0.0558425	0.0983034	UBR3, UBR2, UBR1, LOC122436505	5096	4	15999	3.13952	1	1	0.999221
GOTERM_BP_DIRECT	GO:0000012~single strand break repair	4	0.0558425	0.0983034	TDP1, XNDC1N, XRCC1, APTX	5096	4	15999	3.13952	1	1	0.999221
GOTERM_BP_DIRECT	GO:0007033~vacuole organization	4	0.0558425	0.0983034	VPS4B, VPS4A, VPS11, LOC122434805	5096	4	15999	3.13952	1	1	0.999221
GOTERM_BP_DIRECT	GO:0070498~interleukin-1-mediated signaling pathway	4	0.0558425	0.0983034	IRAK1, IRAK2, TRAF6, IRAK3	5096	4	15999	3.13952	1	1	0.999221
GOTERM_BP_DIRECT	GO:0032979~protein insertion into mitochondrial inner membrane from matrix	4	0.0558425	0.0983034	OXA1L, LOC122426180, LOC122428087, MAIP1	5096	4	15999	3.13952	1	1	0.999221
GOTERM_BP_DIRECT	GO:0050862~positive regulation of T cell receptor signaling pathway	4	0.0558425	0.0983034	CD226, LOC122428878, PVR, NECTIN2	5096	4	15999	3.13952	1	1	0.999221
GOTERM_BP_DIRECT	GO:0032784~regulation of DNA-templated transcription elongation	4	0.0558425	0.0983034	LOC122444987, THOC1, ZNF326, SUPT5H	5096	4	15999	3.13952	1	1	0.999221
GOTERM_BP_DIRECT	GO:1900746~regulation of vascular endothelial growth factor signaling pathway	4	0.0558425	0.0983034	TSPAN14, TSPAN17, TSPAN5, TSPAN3	5096	4	15999	3.13952	1	1	0.999221
GOTERM_BP_DIRECT	GO:0009052~pentose-phosphate shunt, non-oxidative branch	4	0.0558425	0.0983034	RPIA, RPE, TALDO1, TKT	5096	4	15999	3.13952	1	1	0.999221
KEGG_PATHWAY	ccad00250:Alanine, aspartate and glutamate metabolism	18	0.251291	0.0989042	ADSL, GOT1L1, FOLH1B, GPT2, GOT2, GFPT1, ASRGL1, GLS, GLUD1, ALDH5A1, PPAT, ASL, ADSS1, ADSS2, NAT8L, RIMKLB, NIT2, GLUL	3140	42	10427	1.42316	1	0.213584	0.134704
