# Supplementary material for: Peripheral transcriptional responses to experimental SARS-CoV-2 inoculation in North American Elk cows and calves
Source: Research Square preprint supplement (doi:10.21203/rs.3.rs-6505643/v1), 2025-05-15
Supplement: Supplementary file 12 [file f26462ed2ec4ec34f779fdf3.xlsx]

## Sheet: downregulated
Supplementary Table S7 - Downregulated genes in Adults (D0xD2)
gene_id	log2fc	padj
LOC122420697	-2.29652	0.022063
KBTBD3	-2.10209	0.00511004
LOC122445173	-1.92021	0.0235146
ACVR1C	-1.892	0.0185662
TMED5	-1.81948	0.0116127
PGAP1	-1.81745	0.00805155
LOC122420762	-1.76868	0.00694157
BTBD8	-1.76044	0.00463215
GPR174	-1.74693	0.00994904
LPAR6	-1.72047	0.00910489
CLEC7A	-1.69912	0.00311935
LOC122421207	-1.69449	0.0237993
SCOC	-1.6808	0.0247987
MIGA1	-1.67892	0.0241745
PDCD10	-1.67629	0.0191033
ZNF711	-1.67516	0.018284
KIF11	-1.66714	4.43e-06
MAMDC2	-1.66455	0.00639398
ORMDL1	-1.66255	0.0127519
LIN9	-1.65898	0.00126027
TMEM41B	-1.6548	0.0236268
MIER3	-1.63901	0.0263828
LOC122421408	-1.63501	0.0161865
TRIM59	-1.6349	0.000633454
KPNA5	-1.62626	0.0201552
TFRC	-1.62371	0.000491159
FPGT	-1.60929	0.0241718
KATNBL1	-1.59912	0.0194871
ZNF569	-1.59777	0.0140917
CEP135	-1.59626	0.0113573
ZFP14	-1.5856	0.018983
EIF5A2	-1.58301	0.0316742
LOC122442250	-1.57959	0.0126324
ZGRF1	-1.57125	9.02e-05
NPTXR	-1.56863	0.00926681
ZNF300	-1.56529	0.00125533
PCGF6	-1.56183	0.00288473
RMI1	-1.55298	0.0183075
KLHDC1	-1.54889	0.0401397
SLC35A3	-1.54731	0.047675
LOC122423703	-1.54693	0.0264511
SLC2A13	-1.54104	0.0156001
PBK	-1.53824	0.000126536
SLC7A2	-1.53648	0.0156674
THBS1	-1.53185	0.00229749
STYX	-1.51941	0.0240081
SLC25A36	-1.51693	0.0140917
LRRCC1	-1.51469	0.0160167
FRMPD4	-1.51096	0.00794781
TAF1A	-1.5083	0.0141201
ZNF518A	-1.50059	0.0152091
DNAJB14	-1.49766	0.0157093
LOC122421412	-1.49527	0.0204198
ZNF567	-1.48995	0.0336616
TAF13	-1.4893	0.0286753
UHMK1	-1.48639	0.011035
B4GALT6	-1.48353	0.0323884
RHAG	-1.48288	0.0234509
KBTBD8	-1.48121	0.0178266
ZBED8	-1.47425	0.0412767
C16H5orf34	-1.46448	0.0333291
ETAA1	-1.46254	0.0209984
CUL5	-1.46175	0.0102761
PI4K2B	-1.45181	0.00405111
KLHL28	-1.45099	0.0442824
SCAI	-1.44895	0.0235146
HOMER1	-1.44732	0.0191723
KRAS	-1.44188	0.0147159
PHF6	-1.43773	0.0148626
LOC122421383	-1.43134	0.0395351
ECT2	-1.431	0.00103727
INTS2	-1.429	0.00692113
C23H18orf54	-1.42889	0.0203098
TMEM128	-1.42299	0.0413098
KLHL15	-1.42075	0.0178615
MET	-1.41884	0.0217961
ZNF660	-1.41276	0.0191492
TTK	-1.41079	0.00511302
PTGS2	-1.4077	0.0189123
N4BP2	-1.4048	0.0174258
BBS7	-1.40154	0.00135205
LOC122424030	-1.40002	0.0445466
CCDC186	-1.3999	0.0179628
USP53	-1.39763	0.0238716
ZNF367	-1.39505	0.020718
HSPA13	-1.39322	0.0307736
PDIK1L	-1.38314	0.0152091
MS4A2	-1.37908	0.00439532
ETNK1	-1.37523	0.0227209
RIF1	-1.37331	0.00103727
PTBP2	-1.37264	0.0468822
EAF2	-1.37247	0.0102806
TFAP2C	-1.36836	0.0448348
ZNF280D	-1.36434	0.0194871
PPIP5K2	-1.36172	0.0110191
IL6ST	-1.35911	0.0184051
TMEM106B	-1.35767	0.0175716
SMC5	-1.35425	0.0116038
OXR1	-1.35373	0.0268113
ERI2	-1.35182	0.0153305
C4H5orf24	-1.35098	0.0295993
EXOC5	-1.34718	0.0278992
LOC122440621	-1.34166	0.00960933
PEX13	-1.34013	0.0257147
UBA5	-1.33018	0.0144739
RANBP6	-1.3286	0.0184298
SRFBP1	-1.3263	0.0276718
GCFC2	-1.32629	0.0189609
ABHD18	-1.32455	0.0271018
FANCM	-1.3238	0.00211761
ZNF420	-1.32332	0.00283383
ZNF644	-1.32227	0.0162139
SMIM15	-1.3218	0.0292948
CASD1	-1.31927	0.0044029
LOC122421411	-1.31467	0.00606318
TEX30	-1.31406	0.0425586
LOC122447497	-1.31149	0.022063
ELMOD2	-1.30999	0.0399607
FGFR1OP2	-1.30965	0.0212249
LOC122420586	-1.30879	0.0430488
RAB33B	-1.30794	0.0186817
IFT80	-1.30673	0.000440938
SMARCAD1	-1.30388	0.00593442
SKIL	-1.30116	0.022989
SMC4	-1.29701	0.000295559
SENP7	-1.29485	0.0206377
LOC122455298	-1.29479	0.0297179
UBA6	-1.29479	0.00656574
GCNT4	-1.29388	0.0161822
MSH2	-1.29261	0.00134933
VPS13A	-1.29246	0.00427669
BLOC1S6	-1.29225	0.0300978
ZBTB1	-1.29135	0.0194871
ESCO2	-1.29003	0.00380033
HLTF	-1.28758	0.00283954
USP33	-1.287	0.0299421
PIGA	-1.28677	0.0357254
LTN1	-1.28664	0.00286433
DEPDC1B	-1.28649	0.0409903
DNA2	-1.28485	0.0117242
PRPF39	-1.279	0.0227444
CARNMT1	-1.27739	0.0214701
LOC122439842	-1.27573	0.00979425
LOC122425488	-1.27506	0.0300978
SLC26A2	-1.26878	0.0277792
LOC122424239	-1.26844	0.00118658
MIS12	-1.26804	0.0294607
PRKAB2	-1.26695	0.0101009
ZCCHC10	-1.2647	0.0393845
STARD4	-1.26337	0.0440049
SLC12A2	-1.25979	0.00576741
YOD1	-1.25938	0.0266078
TASOR	-1.25908	0.00830947
ALG6	-1.25816	0.0200071
RWDD3	-1.25789	0.0415117
LATS1	-1.25671	0.0121889
BBS10	-1.25593	0.0346684
YTHDC2	-1.25531	0.0318907
LOC122423927	-1.25466	0.0160167
GMFB	-1.25423	0.0374686
GAS2L3	-1.25275	0.045934
SCRN1	-1.25196	0.0308277
TRPM7	-1.25195	0.0154932
TMEM161B	-1.25101	0.0175716
KLHL9	-1.24957	0.0280269
SUB1	-1.24947	0.0443434
GPR155	-1.24845	0.00391311
SLC36A4	-1.24618	0.0279101
MCM8	-1.24454	0.00155131
CRLS1	-1.24353	0.0197305
HOOK1	-1.24201	0.00926681
ZDHHC20	-1.2386	0.0459119
CD200R1	-1.23853	0.0310423
ZNF568	-1.23834	0.0461676
HELLS	-1.23676	1.41e-05
ZBTB11	-1.23486	0.0132512
KIF20B	-1.23457	0.00481842
ATAD2	-1.2334	0.00456874
AHR	-1.23337	0.0173537
ADGRG6	-1.23148	0.0363935
NUDT12	-1.23092	0.0490753
BMI1	-1.23014	0.00822273
SLC35F5	-1.22973	0.0263922
LCORL	-1.22732	0.0439605
LIN7C	-1.22394	0.0434122
ZZZ3	-1.22241	0.0143451
FECH	-1.2204	0.0235146
MYBL1	-1.21975	0.0236268
FMNL2	-1.21846	0.00639398
SCAMP1	-1.21721	0.0484782
SUCNR1	-1.21639	0.000441428
ATE1	-1.21621	0.0140256
LMLN	-1.21381	0.0256732
DCUN1D1	-1.21324	0.0210063
KLHL14	-1.213	0.00652972
SAMD4A	-1.20987	0.0196183
CENPC	-1.20753	0.000735046
LOC122439581	-1.20722	0.0247283
PLAC8L1	-1.20138	0.0134062
PTGER2	-1.20018	0.0205918
OLFM4	-1.19989	0.0290201
RFK	-1.19885	0.0286975
TFAM	-1.1988	0.00606318
ZNF770	-1.19663	0.0240065
ABCC4	-1.19498	0.00439532
IFT74	-1.19487	0.0306295
STK26	-1.1939	0.0224013
SHCBP1	-1.19238	0.0299939
TTC26	-1.1903	0.0235146
PMS1	-1.18931	0.0205466
APPL1	-1.18872	0.0102806
FYTTD1	-1.18719	0.0205082
HAUS6	-1.18662	0.00444072
TMEM245	-1.18563	0.0402348
ORC4	-1.18523	0.0185583
LOC122453076	-1.18329	0.012908
GFPT1	-1.18102	0.0105902
MACIR	-1.18065	0.00891715
ZNF157	-1.18018	0.0117633
DMXL1	-1.17687	0.0130586
SLC41A2	-1.1754	0.0209955
POLQ	-1.1754	0.00662751
KIF18A	-1.17486	9.22e-07
ORC2	-1.17483	0.00896158
SOCS4	-1.17134	0.0413191
LOC122434599	-1.17103	0.0244568
RAPGEF6	-1.17006	0.0191723
LOC122450097	-1.16904	0.0366946
LOC122429209	-1.16778	0.0390403
NFYB	-1.16668	0.0484782
SUZ12	-1.16465	0.0030404
ERCC6L	-1.164	0.0292817
EFR3A	-1.16169	0.0274934
ZMYM1	-1.16154	0.0238716
LYSMD3	-1.15895	0.0292069
SEC24A	-1.15892	0.0125915
FANCL	-1.15788	0.0173852
LRRC40	-1.15786	0.0471864
HMMR	-1.15647	0.00431704
ARAP2	-1.15165	0.00209689
DIPK2A	-1.15031	0.0191314
EIF4E	-1.14813	0.0235516
MAGT1	-1.14762	0.018236
PPP1R2	-1.14648	0.0283189
PPAT	-1.1459	0.00424194
PLK4	-1.144	0.00884429
SMCHD1	-1.14351	0.00444072
TERF1	-1.14148	0.0191418
GALNT7	-1.1395	0.0209431
LOC122451119	-1.13949	0.0370599
HINT3	-1.13887	0.0326493
LANCL3	-1.13537	0.0112938
EDEM3	-1.1342	0.0286975
BZW1	-1.13331	0.0109358
LOC122421667	-1.13268	0.0112323
PARD6B	-1.12668	0.0402137
IL22RA2	-1.12664	0.0174258
LOC122428174	-1.12437	0.0306588
LOC122433002	-1.12396	0.0122896
TBC1D15	-1.12387	0.0217815
ERBIN	-1.12354	0.0189123
LOC122420721	-1.12213	0.0393615
ZNF184	-1.12178	0.00503731
LOC122449754	-1.12113	0.0176268
PPWD1	-1.12069	0.00176083
POLE2	-1.11884	0.0138105
CEP55	-1.11396	0.0176034
SLF1	-1.11341	0.00346147
LOC122419957	-1.11304	0.0411378
CSNK1G3	-1.11248	0.0463405
POLR3G	-1.11239	0.0359293
ZNF354A	-1.11196	0.0165071
WRN	-1.10986	0.00198353
GTF3C3	-1.10912	0.0393527
MARCHF7	-1.10687	0.0440761
RESF1	-1.10609	0.017563
GUF1	-1.1059	0.0236268
KCNJ2	-1.1051	0.00299398
ROCK2	-1.10352	0.0359909
IMPG2	-1.1028	0.0226731
KCTD12	-1.10234	0.0182367
OSBPL8	-1.10217	0.0236136
DDHD1	-1.10177	0.00230125
DLGAP5	-1.10157	0.00570593
ZFP82	-1.10076	0.0340887
HAL	-1.09866	0.0378597
HERC4	-1.09777	0.015864
DIS3	-1.09714	0.00281312
NCAPG	-1.09702	0.0057047
TOGARAM1	-1.09656	0.00444072
SLC16A10	-1.09602	0.0425473
LOC122421201	-1.09517	0.00917768
ZMAT3	-1.09502	0.0375765
SENP6	-1.09436	0.0102379
SMC2	-1.09427	0.000512717
CD69	-1.0938	0.0445303
PRIM1	-1.09342	0.00316139
PTPN13	-1.09337	0.00176743
LOC122428878	-1.08999	0.0189123
ZNF280C	-1.08882	0.0123241
MATR3	-1.08854	0.00297944
MDM1	-1.08515	0.026084
ARMT1	-1.08499	0.0432025
MYNN	-1.08227	0.0324944
ALCAM	-1.08128	0.0468822
RUFY2	-1.08025	0.0235146
SNX14	-1.07919	0.040983
RAD18	-1.07887	0.00554437
LOC122420584	-1.07619	0.0241272
ATP13A3	-1.07192	0.0408571
MAN1A1	-1.07058	0.026646
UHRF1BP1L	-1.0704	0.0478375
FLVCR1	-1.07035	0.0243967
MAP4K5	-1.06962	0.0238716
CEP70	-1.06873	0.00606318
ITGA6	-1.06821	0.00455485
LOC122453943	-1.06766	0.0397579
PLEKHA1	-1.06742	0.0300819
ATR	-1.06595	0.0106479
PDLIM5	-1.06515	0.0250175
ADAM10	-1.06229	0.0393845
CCP110	-1.05886	0.0167661
LOC122435217	-1.05828	0.0383783
LOC122448186	-1.05817	0.0341008
PYGO1	-1.05639	0.0413098
CRY1	-1.05488	0.000439028
RALGAPA1	-1.05479	0.0274297
G2E3	-1.05466	0.0362053
NUS1	-1.05382	0.0290201
SLC5A3	-1.05364	0.0382202
SERINC1	-1.05341	0.0142865
PALS1	-1.0526	0.00580284
LOC122428082	-1.04936	0.0263022
OBI1	-1.04905	0.018236
PDGFD	-1.0476	0.00528597
IBTK	-1.04489	0.0119379
LOC122420718	-1.04465	0.00424194
WDR44	-1.04429	0.0340049
KRIT1	-1.04248	0.00903142
FAT4	-1.04165	0.0307736
DSCC1	-1.04093	0.042602
SGO2	-1.03801	0.0236404
SIRT1	-1.03592	0.0168638
WDHD1	-1.03527	0.0141201
TNPO1	-1.03479	0.0243967
FAM13B	-1.03471	0.0279774
CLIP4	-1.03469	0.000892862
RCBTB1	-1.03391	0.0489119
RBM41	-1.03308	0.0241745
E2F7	-1.03248	0.0201454
SERPINB7	-1.03233	0.0213133
ZBED5	-1.03227	0.020655
LOC122438856	-1.03171	0.000295559
LOC122424879	-1.03064	0.0079659
DNTT	-1.0297	0.00211761
TTC39B	-1.02933	0.0431639
PPP1CB	-1.02903	0.0239582
NIPAL1	-1.02855	0.0333291
CEP76	-1.02844	0.0181804
AASDH	-1.02729	0.0191492
ZNF507	-1.02706	0.0170622
ARMCX1	-1.02632	0.0238729
CCNC	-1.02563	0.0339433
MBNL1	-1.0246	0.0415638
PRTG	-1.0242	0.0371977
PTPN4	-1.02346	0.00554397
LOC122438252	-1.0227	0.0483743
THEMIS	-1.02261	0.0102101
TNKS2	-1.02083	0.0211669
ZNF175	-1.01996	0.0434926
MAP3K1	-1.0197	0.0388503
SMIM14	-1.01891	0.0240343
SLC25A40	-1.01868	0.0272325
EIF4A2	-1.0157	0.0216684
OSTM1	-1.01544	0.0443434
C1H4orf46	-1.01445	0.0363935
LRPPRC	-1.01326	2.51e-05
MYEF2	-1.00998	0.0160081
IMPACT	-1.00974	0.0375002
TRAPPC13	-1.00792	0.0175716
LOC122448427	-1.00771	0.0490108
CCNT2	-1.00752	0.0420076
GXYLT1	-1.00745	0.0225263
ZNF23	-1.0073	0.0247283
HLF	-1.00722	0.000523926
SLC38A2	-1.00682	0.0474426
LOC122427080	-1.00597	0.018826
BARD1	-1.0053	0.0309051
RECQL	-1.00313	0.00598493
TCAF1	-1.00151	0.00287877
GPAM	-1.00114	0.0112987
LOC122435830	-0.998495	0.0175398
BCAT1	-0.997159	0.00895606
ATAD5	-0.995967	0.00606318
RAD1	-0.995173	0.0205302
CGRRF1	-0.995016	0.0347757
IREB2	-0.994912	0.0245126
DENND6A	-0.994485	0.0322651
CDK1	-0.994243	0.0375984
PAWR	-0.993349	0.0480815
ZBTB33	-0.992765	0.0372152
CDC27	-0.991788	0.0137024
CAND1	-0.991166	0.000413967
LOC122422254	-0.991107	0.00528597
DPY19L3	-0.990522	0.0323884
RASA1	-0.989174	0.0310951
LOC122437042	-0.985745	0.0362053
HEATR5A	-0.985537	0.0329689
CNST	-0.985324	0.0183075
QSER1	-0.985153	0.0187279
PCM1	-0.983986	0.00120952
IKZF2	-0.982309	0.0251276
MAN2A1	-0.980942	0.0271018
STAG2	-0.979994	0.0197384
MAPK6	-0.979911	0.0442824
CD164	-0.978322	0.0388387
CHIC1	-0.97813	0.0309421
ZBTB38	-0.978033	0.00697957
ESCO1	-0.976828	0.0439266
MYO5C	-0.976794	0.0104003
GTF2H3	-0.97591	0.0251279
USP46	-0.974943	0.0351535
RAD54B	-0.9743	0.00971011
RIT1	-0.97417	0.0478375
TMEM87B	-0.973206	0.02773
LOC122420166	-0.97269	0.0486978
SYTL2	-0.972209	0.000863688
TMPO	-0.970559	0.018236
POGLUT3	-0.969629	0.0210607
ADSS2	-0.969198	5.35e-05
RNF19A	-0.968914	0.0251551
BHLHB9	-0.964704	0.0065448
APAF1	-0.964144	0.0251551
LOC122441872	-0.964023	0.0263828
COPS2	-0.963941	0.0257147
GPRIN3	-0.963302	0.00281312
GALC	-0.963236	0.0480815
LOC122440602	-0.963205	0.0287506
DNAJC10	-0.963078	0.00480159
ATM	-0.960759	0.00205735
LOC122447137	-0.960645	0.0211063
AASDHPPT	-0.960503	0.0246633
MTREX	-0.960321	0.00110133
FAM111B	-0.959125	0.0422869
ELK4	-0.958129	0.0102101
TBC1D19	-0.956209	0.0453326
SF3B1	-0.956146	0.0292768
ASPM	-0.955846	0.0224978
DCLRE1A	-0.955831	0.0323301
ZBTB10	-0.954923	0.0375002
LRCH3	-0.954916	0.042496
ATP11B	-0.954137	0.0452957
RFX3	-0.952846	0.0333291
LOC122447053	-0.95271	0.0252075
DNAJB9	-0.950792	0.0228963
CIP2A	-0.949006	0.0197041
BUB1B	-0.948564	0.00338763
LOC122449683	-0.948261	0.0150494
GRPEL2	-0.948114	0.0256732
LOC122448236	-0.947337	0.0333291
HSDL1	-0.947206	0.00658163
DNAAF2	-0.947092	0.0375926
CD226	-0.946335	0.0411038
TRAPPC8	-0.945189	0.0230307
ACVR2A	-0.943836	0.0372794
ZBTB41	-0.943344	0.0217961
DENND4C	-0.942556	0.0014246
LOC122452371	-0.941808	0.042201
POT1	-0.94047	0.00906856
SLC30A6	-0.939964	0.0246633
PLXNC1	-0.939795	0.0294607
CPNE3	-0.939281	0.0419546
CCDC171	-0.939267	0.0197384
LRRC58	-0.938179	0.0487392
SUCO	-0.937886	0.0350655
CKAP2	-0.937483	0.0165071
RASGRP1	-0.936523	0.0121755
PREPL	-0.934834	0.0371977
TM9SF3	-0.933845	0.0263828
ATG2B	-0.933521	0.047278
TAX1BP1	-0.933224	0.0200028
PLAGL1	-0.932592	0.0111277
DOCK11	-0.931434	0.00740684
LOC122425718	-0.930146	0.0430488
SPTY2D1	-0.929214	0.0427835
CASP8AP2	-0.928831	0.00659121
PNPLA8	-0.928741	0.0102101
SMARCA5	-0.928654	0.00511004
CDC7	-0.926671	0.044416
KATNAL1	-0.92655	0.0233651
ATP8A1	-0.925936	0.00906856
RB1	-0.925236	0.0305589
HBS1L	-0.92503	0.00528597
STIL	-0.924154	0.00961205
MSH3	-0.92379	0.00999767
AGPAT5	-0.923764	0.043276
CEP350	-0.923264	0.0128186
ARHGAP11A	-0.923017	0.0170574
SOCS5	-0.921847	0.0109358
MMGT1	-0.921295	0.0299421
TBL1XR1	-0.921086	0.0324546
CEP120	-0.920729	0.0489797
FBXO5	-0.920661	0.0448849
PDE4D	-0.919005	0.00377792
GNPNAT1	-0.918926	0.0432597
LOC122432320	-0.918845	0.0291569
GLMN	-0.91877	0.0326061
MIS18BP1	-0.918141	0.0431591
CARF	-0.917652	0.0190158
NPHP3	-0.917451	0.0293915
SLC35A5	-0.917393	0.0458585
LOC122453723	-0.917014	0.0156001
CNOT7	-0.915996	0.0421538
GMCL1	-0.915021	0.0344182
DDIAS	-0.911789	0.0201552
RWDD4	-0.911735	0.0362053
TRMT1L	-0.910472	0.0160167
TAOK1	-0.910456	0.0489119
TANC1	-0.910422	0.0272778
CDC40	-0.909791	0.0260479
OSBPL11	-0.908433	0.0283189
IPO7	-0.908321	0.00366474
SLC10A7	-0.908061	0.0118716
SLC25A46	-0.907321	0.0295757
EXOC6	-0.906805	0.0428568
CCDC90B	-0.905914	0.0490108
NRAS	-0.905468	0.0415673
RORA	-0.905423	0.0154011
GOLT1B	-0.904505	0.0458349
ACADM	-0.903976	0.0249307
USP1	-0.903458	0.0303875
ASCC3	-0.902783	0.00372299
KIF15	-0.902238	0.0183473
USP12	-0.901719	0.00692511
APC	-0.901017	0.0222146
LOC122438655	-0.90046	0.0247664
ZHX1	-0.899795	0.0167661
LOC122420719	-0.898968	0.00174589
ANGEL2	-0.898426	0.0459169
JRKL	-0.898052	0.0408571
PPP1R9A	-0.897615	0.0340202
PDS5A	-0.895016	0.0103898
RMND5A	-0.894693	0.0120102
ZNF146	-0.894397	0.0440579
NDC1	-0.894128	0.0179362
STT3B	-0.89225	0.0153648
PDS5B	-0.891415	0.0125655
MAD2L1	-0.890002	0.0415638
PPFIBP1	-0.889994	0.0397579
SLC38A1	-0.889467	0.00574879
HPGD	-0.889108	0.0251551
CUL2	-0.888974	0.0336224
WEE1	-0.888449	0.00173122
HECTD1	-0.88815	0.00783633
CRIM1	-0.888092	0.00205735
LOC122444987	-0.887971	0.0179362
RAB30	-0.886882	0.0326165
ANKRD13C	-0.884594	0.0336224
NCOA4	-0.883038	0.00960933
RFX7	-0.880482	0.0319192
LOC122449830	-0.880156	0.00838762
VPS50	-0.88014	0.00584761
UTP15	-0.878976	0.0249852
GEMIN6	-0.87813	0.0363935
ARHGAP12	-0.877974	0.0319672
EGR3	-0.877537	0.0130586
LOC122440466	-0.877373	0.00908509
AEBP2	-0.877367	0.00491707
CBFB	-0.877258	0.0453326
GLS	-0.877042	0.0280097
NAA16	-0.87653	0.0379435
SRGN	-0.876513	0.0429779
PUS7L	-0.876256	0.0462048
ISCA2	-0.875915	0.0369131
NBN	-0.875899	0.00250309
RBAK	-0.875603	0.00118066
ITCH	-0.875569	0.0411713
FCAR	-0.873587	0.0213717
GTF3C4	-0.873287	0.0031738
SNX4	-0.872698	0.0422869
SLC30A5	-0.870888	0.0400472
RCAN3	-0.870582	0.0205302
PCLAF	-0.869678	0.0415638
TAF1B	-0.866634	0.0452178
RRN3	-0.865954	0.0038376
POLI	-0.865839	0.0211669
RBM12B	-0.865484	0.0175716
THUMPD1	-0.864886	0.0397756
C33H6orf120	-0.864728	0.0306584
ZNF24	-0.864178	0.00954904
ZNF606	-0.863828	0.0152198
HAT1	-0.863817	0.0457333
MTMR6	-0.863622	0.0291456
HELQ	-0.863511	0.0375002
ADD3	-0.862458	0.0423028
MRE11	-0.862216	0.00917768
PPIL4	-0.86142	0.0191723
DCUN1D4	-0.861158	0.0175716
NEK1	-0.859511	0.000333849
SIPA1L2	-0.85894	0.00794711
NAB1	-0.857951	0.0236136
AZIN1	-0.857439	0.0189123
ZNF26	-0.857419	0.0390403
TCF12	-0.857102	0.0130615
LOC122451514	-0.85708	0.0468822
C2CD5	-0.856167	0.0280097
GPN3	-0.854679	0.0496182
CAAP1	-0.854135	0.0315833
EXOC8	-0.854079	0.0265707
VPS54	-0.853733	0.0295757
BTAF1	-0.853521	0.0201552
UBE3A	-0.853023	0.0145375
POGLUT1	-0.852032	0.0461676
INPP4B	-0.847315	0.0102806
DPP8	-0.847082	0.0366946
CLINT1	-0.846931	0.0112323
EML4	-0.845931	0.0123811
DENND5B	-0.845738	0.0411002
LOC122435265	-0.844637	0.00854447
ZKSCAN7	-0.844507	0.00638185
MTERF1	-0.844503	0.0330513
SCLT1	-0.843879	0.0195614
ABCE1	-0.842763	0.0267371
LIN54	-0.842044	0.0333291
SS18	-0.841787	0.0238729
KCTD3	-0.841593	0.0332339
SMIM13	-0.841316	0.0429001
CDK8	-0.840442	0.0143889
SPC25	-0.840041	0.0250196
SHPRH	-0.839742	0.0451627
ASXL2	-0.839698	0.0141244
TUBGCP5	-0.839447	0.0175398
KLHL7	-0.839267	0.0229315
VAMP4	-0.838721	0.0379105
WDR43	-0.837943	0.0271018
LOC122451878	-0.837772	0.0296267
RHOT1	-0.837217	0.0135695
SEC24B	-0.836591	0.0255251
UGDH	-0.83642	0.0191723
CLOCK	-0.835974	0.0154932
NSL1	-0.835937	0.0203863
GNE	-0.835871	0.00574879
INPP5F	-0.835622	0.0240095
WDR76	-0.834783	0.00632606
HSF2	-0.834088	0.0420338
TTC21B	-0.832834	0.0139067
HSD17B11	-0.832733	0.0390403
SMC3	-0.832138	0.00311935
NEDD1	-0.830605	0.0298595
MAP7	-0.828173	0.0439221
DARS2	-0.826397	0.0182367
CBLB	-0.826355	0.00171368
BRCA1	-0.825126	0.00444072
USP15	-0.824766	0.0341008
TASOR2	-0.823358	0.0210607
PPP4R3B	-0.822825	0.0154011
HOOK3	-0.822376	0.0371977
MAST4	-0.821961	0.000929167
LOC122443420	-0.821853	0.0191418
AKAP11	-0.821344	0.00129567
NR1D2	-0.820833	0.0392888
PAXBP1	-0.81981	0.0339433
MED23	-0.81975	0.00227152
CCNB3	-0.819715	0.0193493
SCAF11	-0.819659	0.018236
RC3H2	-0.819426	0.0341251
RELCH	-0.815063	0.0303255
RAB6A	-0.812751	0.0398822
ZYG11B	-0.811754	0.0428775
GALNT1	-0.810426	0.0340887
VPS13C	-0.810261	0.012939
OMA1	-0.810165	0.0157093
SLC9A6	-0.809236	0.0404869
DOCK9	-0.808301	0.0111122
PABIR2	-0.807905	0.0172867
CLPX	-0.807891	0.0174258
CAB39	-0.807725	0.0358583
TIGD2	-0.807348	0.0184581
TAF4B	-0.806918	0.0132147
SEC63	-0.806772	0.00131164
DDI2	-0.805758	0.00252681
GTF2E1	-0.805713	0.0251551
ZNF41	-0.80564	0.0326035
LOC122434053	-0.80556	0.0388336
E2F8	-0.805492	0.018826
MFN1	-0.805489	0.0265284
DYNLT3	-0.805315	0.0495261
NAA30	-0.804625	0.0146389
WAPL	-0.803708	0.0164745
TRIM23	-0.803566	0.0404982
PLRG1	-0.802634	0.0278992
DCAF16	-0.801776	0.00906856
DDHD2	-0.801262	0.00171552
PIK3C3	-0.799423	0.0184298
MTMR12	-0.798687	0.0276218
ITGA1	-0.798403	0.0135413
ANKIB1	-0.798096	0.0189301
CPSF2	-0.797563	0.00439788
ZNF140	-0.797085	0.0434897
LRBA	-0.797051	0.00439532
PRKD3	-0.797032	0.0141758
MGAT4A	-0.796766	0.0320593
LOC122445522	-0.796705	0.00997607
ELP1	-0.795353	9.79e-05
PHKB	-0.795063	0.0228028
DZIP3	-0.794891	0.0436484
GNPTAB	-0.794147	0.0229158
TLK1	-0.791046	0.00903142
TOPBP1	-0.790994	0.00354468
ZDHHC23	-0.790908	0.0417148
UBL3	-0.790485	0.0424533
TMEM170A	-0.790206	0.0442824
PIKFYVE	-0.790199	0.0316562
PPP6R3	-0.790015	0.0165071
ALG13	-0.789981	0.0400103
ITGA4	-0.78783	0.0409805
CEP68	-0.787622	0.0306456
ZFP1	-0.786809	0.0424861
ZMYM4	-0.786272	0.0117712
LRRC66	-0.786117	0.0474936
RHPN2	-0.785769	0.0280097
LOC122421285	-0.785227	0.0249396
C2H1orf216	-0.784666	0.0482754
SLC25A53	-0.784649	0.0170936
ERCC6L2	-0.784582	0.0357875
OXCT1	-0.78372	0.00410184
LOC122452816	-0.783485	0.00370428
CEPT1	-0.783027	0.0157093
NUP43	-0.782156	0.01674
NUP160	-0.78194	0.00593442
IPO8	-0.779657	0.0320656
LOC122441347	-0.779585	0.0112323
SFT2D2	-0.779119	0.0227519
ARMCX3	-0.778921	0.0289372
IPO11	-0.778509	0.0288768
SPCS3	-0.778403	0.0445466
LANCL1	-0.777998	0.0249745
YTHDF3	-0.77761	0.0419546
RPS6KA3	-0.777511	0.0206013
SESN3	-0.777404	0.0267405
GABPB1	-0.77621	0.0483743
NAA25	-0.776049	0.0326303
LOC122421399	-0.775676	0.0127519
DTL	-0.772777	0.0455274
SRBD1	-0.772294	0.00230412
TMOD3	-0.772227	0.0162097
ARV1	-0.769743	0.0293067
SEPTIN7	-0.768365	0.0297544
TRIP11	-0.76824	0.00618613
GORAB	-0.767583	0.0420619
AFF4	-0.766913	0.0435856
RBL2	-0.766828	0.0297544
TSC22D2	-0.765976	0.0435856
PLEKHA8	-0.765507	0.0387442
USO1	-0.764825	0.0139645
ZMPSTE24	-0.764738	0.0388129
INTS13	-0.76401	0.00187998
MIS18A	-0.763077	0.0165071
CACUL1	-0.762927	0.0181017
SLC30A7	-0.76286	0.0459846
SACM1L	-0.7601	0.0238716
MPP7	-0.758452	0.0203098
CLASP2	-0.758164	0.0286975
RALGPS2	-0.757228	0.00258584
JMJD1C	-0.756997	0.0294607
MAP3K7	-0.756763	0.0404033
USP38	-0.75661	0.0226847
RIMBP2	-0.756354	0.0291707
XPOT	-0.756199	0.00921023
DLG1	-0.756084	0.0197384
UBN2	-0.755986	0.046654
FEM1B	-0.755968	0.0257964
SUN1	-0.755132	0.0048626
ERI1	-0.754951	0.0274297
LOC122439762	-0.753741	0.0480815
LOC122441630	-0.753397	0.0363935
NTN4	-0.752896	0.046946
ABRAXAS1	-0.752133	0.0453189
PFAS	-0.751908	0.000866411
PDCD4	-0.751718	0.00528597
CEBPZ	-0.751039	0.00469764
TUBE1	-0.750761	0.0470631
TRAF5	-0.750226	0.00606318
PRMT9	-0.749625	0.0185583
TAF2	-0.74951	0.00511004
CCDC14	-0.748873	0.0196998
QRSL1	-0.74887	0.0157093
ITGB1	-0.747993	0.0162321
BIRC6	-0.747925	0.00160411
GPALPP1	-0.746901	0.0344352
TCP11L2	-0.746898	0.0245627
RIOK3	-0.746	0.0263828
SACS	-0.745414	0.0228963
LPGAT1	-0.744683	0.0323884
KNL1	-0.74374	0.0472715
PBRM1	-0.743136	0.00554397
LOC122447069	-0.742358	0.0205302
NUDCD1	-0.742041	0.00903142
LOC122441418	-0.741657	0.0102101
INTS8	-0.740864	0.00264305
ABI2	-0.739622	0.0211597
TULP4	-0.739141	0.0184581
PPM1B	-0.73821	0.0432482
HCFC2	-0.73741	0.0154972
PATJ	-0.736979	0.00211761
TM7SF3	-0.736879	0.0356214
PPEF1	-0.735614	0.0187758
GFM2	-0.735455	0.000878729
NUP58	-0.735261	0.0185723
ZNF397	-0.735169	0.00955103
SLC16A7	-0.735074	0.0482072
PPP1CC	-0.733996	0.026877
MCM6	-0.732906	0.00254193
DHX15	-0.731656	0.0290652
LRP6	-0.731272	0.0387727
LOC122451652	-0.730788	0.0359001
ZNF182	-0.73074	0.0238716
LOC122420632	-0.730282	0.0229158
SBDS	-0.73002	0.0356811
PCF11	-0.729837	0.047763
ERCC4	-0.729708	0.00452055
RRM2	-0.72826	0.0249307
RAD21	-0.728215	0.0411038
STAG1	-0.727889	0.00873918
RDH10	-0.727117	0.0461676
RBBP8	-0.727021	0.047278
SBNO1	-0.727018	0.0286975
CREB1	-0.726816	0.0200028
ARMC1	-0.726552	0.0243967
ANAPC4	-0.7256	0.0104477
BEND7	-0.725449	0.0183075
MTFR2	-0.725269	0.0191723
KLHL11	-0.72504	0.00709744
ITPR1	-0.723482	0.00506297
PAG1	-0.723141	0.0205302
ITK	-0.723044	0.00606318
ZFC3H1	-0.721409	0.0489484
LRIG2	-0.719389	0.0427345
MTR	-0.718368	0.0102101
WDR19	-0.718056	0.0172713
LOC122426885	-0.717984	0.0257702
SMG1	-0.71612	0.0398645
SPDL1	-0.715359	0.0474425
MTF2	-0.715244	0.0419739
LOC122422768	-0.714151	0.00094542
KIF23	-0.713988	0.0298184
KDM6A	-0.712487	0.0340887
ATL2	-0.712037	0.0263022
SLC25A32	-0.711878	0.0176915
LOC122436731	-0.710041	0.0320593
FRYL	-0.709483	0.0229158
IDE	-0.709311	0.0102101
MALT1	-0.708901	0.00971011
DNTTIP2	-0.708646	0.00183077
PRKCH	-0.708522	0.00258659
DNAJC3	-0.708199	0.00763824
TRMT5	-0.708023	0.0375284
TAB3	-0.70797	0.0418337
FNDC1	-0.707543	0.0393636
ZNF451	-0.707331	0.0134801
COBLL1	-0.707064	0.0223282
HEG1	-0.706435	0.0182367
LOC122435300	-0.706226	0.0274812
AP4E1	-0.705013	0.0411099
SCCPDH	-0.704601	0.01674
USP37	-0.704458	0.0176915
ATP6V1A	-0.703461	0.033273
METTL14	-0.702626	0.00399571
MCOLN2	-0.702534	0.00252681
NKRF	-0.701693	0.0123525
DARS1	-0.700813	0.0139525
VPS26A	-0.700784	0.0426952
SENP5	-0.700747	0.00960933
KCTD6	-0.698255	0.0487305
KIDINS220	-0.698228	0.0289372
ARFGEF2	-0.69648	0.000868664
POLR2B	-0.696194	0.00153918
DDX20	-0.69594	0.000165459
C1H17orf75	-0.695907	0.0160167
FAM8A1	-0.693615	0.0488756
TGFBR3	-0.693083	0.0145375
CEP192	-0.691944	0.00203647
WDR75	-0.691611	0.0133655
CCDC82	-0.691077	0.0449509
ZNF445	-0.690794	0.0154932
QTRT2	-0.690409	0.0328556
LOC122421105	-0.689125	0.0229158
MYB	-0.688293	0.0431639
PPP2R1B	-0.688077	0.018236
HSPA4	-0.687304	0.000123538
C7	-0.686546	0.000353067
ZNF789	-0.686324	0.02237
MSH6	-0.684188	0.00407646
WWP1	-0.683095	0.0238729
ECHDC1	-0.683032	0.0311917
LDLRAD3	-0.682897	0.0262731
SCP2	-0.682804	0.0109358
STRN	-0.682704	0.0336224
USP14	-0.68116	0.00153918
UBR5	-0.680984	0.0247623
LOC122442137	-0.67786	0.0052383
DONSON	-0.677247	0.0398579
FAM120C	-0.677212	0.0160167
LOC122451959	-0.676161	0.0326303
SELENOI	-0.675405	0.0154641
FAM217B	-0.675131	0.0392636
LOC122435840	-0.670504	0.0203098
ZMYM2	-0.67031	0.0171803
TUT4	-0.669158	0.0249307
PNMA1	-0.668103	0.0442824
KTN1	-0.667218	0.0380778
OPA1	-0.666398	0.00541239
MON2	-0.666207	0.0455196
IARS1	-0.664826	0.00514977
SPATA5	-0.664702	0.0386163
ATP10D	-0.663945	0.0179362
DNAJC9	-0.662923	0.0224572
PURB	-0.662869	0.0146666
TLR3	-0.66203	0.0282475
CEP78	-0.659429	0.00511302
ZFR	-0.65941	0.017882
RMDN2	-0.659348	0.0475899
MYO5A	-0.659338	0.0257147
CEP128	-0.65885	0.0357541
USP16	-0.658055	0.0200827
NUP133	-0.657764	0.000726191
DNM1L	-0.65589	0.0283189
LOC122420285	-0.655297	0.0300992
TAF5	-0.654954	0.00763824
FASTKD3	-0.654228	0.0458824
ETS1	-0.653851	0.00211761
BCOR	-0.653686	0.00108942
UTP6	-0.652536	0.00337082
CHST11	-0.651439	0.0233192
LOC122429837	-0.650397	0.0174258
SATB1	-0.650088	0.0175716
DNAJC27	-0.649723	0.0164745
MCM10	-0.648401	0.00872577
CUL3	-0.648079	0.0170622
CLTC	-0.648037	0.0240065
BRWD1	-0.646892	0.0401651
KIFAP3	-0.646851	0.0160167
SEL1L	-0.646321	0.0357254
NEMP1	-0.645416	0.00999767
PPP2R5E	-0.643869	0.0238716
ABCB10	-0.643778	0.0192405
CTH	-0.642735	0.0332339
COG3	-0.642349	0.0203098
HIVEP2	-0.641766	0.000695471
XPNPEP3	-0.64151	0.0119782
UFL1	-0.640382	0.0285825
PTPN11	-0.640065	0.022027
TCERG1	-0.638348	0.0122322
RAD50	-0.638345	0.00314964
KPNA3	-0.638018	0.0462728
IFT88	-0.636727	0.0215809
NARS2	-0.636207	0.0427835
CANX	-0.635879	0.0122896
VRK1	-0.634232	0.00955103
CENPF	-0.634041	0.0268113
TPP2	-0.632762	0.00508239
NCOA3	-0.63264	0.0461676
UBQLN2	-0.632498	0.0152198
ZNF22	-0.632008	0.0154271
ITPR2	-0.631808	0.0158633
PRRC1	-0.631806	0.0122322
KMT2A	-0.631501	0.0161173
HECA	-0.63137	0.0432597
LOC122439477	-0.630955	0.0357541
LMAN1	-0.630465	0.0166897
ZNF638	-0.629054	0.0336365
DIPK1A	-0.628664	0.0294534
CPLANE1	-0.627315	0.00444072
STAM	-0.625766	0.048716
DLD	-0.625371	0.00878122
RPS6KC1	-0.625322	0.0263828
LOC122453213	-0.624712	0.0284615
PDP2	-0.624418	0.0461676
EXTL2	-0.623277	0.0336616
RRAGB	-0.618817	0.014913
RFWD3	-0.61878	0.00554397
G3BP2	-0.618625	0.0408571
DGKE	-0.618419	0.0388503
DENND1B	-0.617703	0.0184051
CEP57	-0.617303	0.00697957
PTGES3	-0.617162	0.0350937
TTC37	-0.615519	0.0130586
RUNX2	-0.615425	0.0242849
VPS36	-0.615269	0.0175503
EHHADH	-0.615151	0.0073053
SCFD1	-0.614579	0.00738057
LARP4	-0.612508	0.0081679
LOC122453049	-0.612367	0.0304212
SLC16A14	-0.612161	0.0404033
SLC25A30	-0.611759	0.0299797
GABPB2	-0.611625	0.0322651
RAB10	-0.610611	0.0410085
CX3CR1	-0.61032	0.0160487
GEMIN5	-0.610273	0.0191723
LOC122453777	-0.61021	0.0414016
GART	-0.60969	0.00541239
LOC122445535	-0.609189	0.0400472
SETBP1	-0.609159	0.0274257
API5	-0.6085	0.0115961
LOC122439416	-0.608174	0.0228058
LOC122431605	-0.607969	0.0395119
UBA2	-0.605714	0.0192405
SRP54	-0.605516	0.0196594
ZMYND11	-0.605153	0.0409805
CEP152	-0.604788	0.0229315
AFF3	-0.604403	0.00707203
MAK16	-0.604279	0.0171803
TCP11L1	-0.603531	0.0274297
ZKSCAN2	-0.602804	0.0375002
CSDE1	-0.601976	0.00763824
GNA13	-0.601122	0.0197305
MTRR	-0.601108	0.02237
GHITM	-0.600887	0.0131587
TXLNG	-0.600504	0.00590445
RAPGEF2	-0.600425	0.038168
EIF2AK3	-0.600209	0.0150543
LOC122420605	-0.595101	0.0379674
AKIRIN1	-0.594995	0.0341008
ATP2B4	-0.594263	0.00909502
PAPOLA	-0.592312	0.0470631
DOP1A	-0.592066	0.0318066
DOCK10	-0.591953	0.014923
SLC7A1	-0.591809	0.0189929
CD28	-0.591548	0.0165071
CKAP5	-0.591031	0.00999767
MTHFD2	-0.590911	0.0381708
CIT	-0.589503	0.0480171
UBE2N	-0.588592	0.0263325
NCBP3	-0.587328	0.0280269
LDLRAD4	-0.587156	0.02439
MGA	-0.58618	0.00678958
LOC122454286	-0.585962	0.0120489
PRKCE	-0.585081	0.0284253
ABCA5	-0.581974	0.00071203
DCAF13	-0.581622	0.0112938
ZBTB39	-0.579615	0.0224013
ZWILCH	-0.578814	0.0140902
TAF7	-0.578427	0.02237
KNTC1	-0.578323	0.0328063
ARHGEF3	-0.577984	0.00982625
FAM120A	-0.576847	0.0440175
HNRNPH1	-0.576761	0.0281814
ZNF664	-0.576436	0.00593442
SLC39A14	-0.575742	0.00666345
POLR1B	-0.573994	0.00487804
ANKRD28	-0.573575	0.0393527
NUP155	-0.572804	0.00322632
LOC122445883	-0.572722	0.0236086
RBM26	-0.572617	0.0350937
KICS2	-0.572133	0.0236268
RRM1	-0.570752	0.0297891
NLRC3	-0.569672	0.00474554
NOL8	-0.566986	0.00473488
PPFIA1	-0.566838	0.0285408
ZNF132	-0.566234	0.0389539
DDX5	-0.564982	0.0336365
TSPYL1	-0.564476	0.0251506
SFMBT2	-0.564395	0.00745191
BHLHE40	-0.562842	0.000750473
AKT3	-0.562028	0.0238716
UBQLN1	-0.560929	0.0358282
EFCAB8	-0.560595	3.63e-05
ORC5	-0.560526	0.0228963
SNAPC3	-0.560448	0.00606318
ZBTB43	-0.560087	0.0490753
LOC122448504	-0.559543	0.0128141
RPS6KB1	-0.559447	0.0450707
KDM4C	-0.559178	0.0102371
NFYA	-0.558757	0.0224572
UTP20	-0.558166	5.5e-05
RNF168	-0.557979	0.0359255
NAE1	-0.557378	0.0191492
CLUAP1	-0.557365	0.0173184
IDH3A	-0.556695	0.000816878
NUP153	-0.556341	0.041672
TMEM192	-0.555659	0.0428374
ACSL4	-0.554866	0.0427345
MYO9A	-0.554332	0.00484201
NIPSNAP2	-0.553483	0.0445303
ATRX	-0.551319	0.0271018
SH3RF1	-0.550744	0.00361282
HMGCS1	-0.550669	0.0497693
TOP2B	-0.550572	0.0118748
LMBR1	-0.550121	0.0459846
CAMK2D	-0.549231	0.0373118
CCT6A	-0.548789	0.0112323
C2H1orf109	-0.548476	0.0476454
PNRC2	-0.547784	0.0441907
GOLM1	-0.547493	0.0350937
TNKS	-0.546669	0.0359654
ZNF250	-0.546469	0.0319672
MYOM1	-0.545632	0.0314734
RABEP1	-0.544394	0.0251551
SRSF1	-0.544204	0.0367489
MAGEE2	-0.544101	0.0420409
SLC9A7	-0.54391	0.0241011
ZMIZ1	-0.542935	0.0154011
DHX29	-0.54033	0.000956842
RIOK2	-0.539714	0.00574879
SLC7A6	-0.537139	0.00822677
C5H2orf49	-0.536635	0.0249745
AKAP14	-0.535865	0.0102101
ARID1B	-0.535646	0.0269422
ASH1L	-0.535588	0.0292817
AQR	-0.535431	0.00164815
PARN	-0.533012	0.0278333
LOC122432813	-0.532058	0.0335631
SPATA13	-0.531787	0.00697957
PRPF38A	-0.531593	0.031387
TRIM52	-0.531218	0.0339521
FUT11	-0.530749	0.0284214
FAM120B	-0.530211	0.0409903
LOC122448753	-0.529024	0.0342201
ZNF286A	-0.528301	0.0106127
RACGAP1	-0.52647	0.0271011
COPB1	-0.526384	0.033243
BCLAF1	-0.526118	0.013256
HERC3	-0.526024	0.0417148
RIC8B	-0.525258	0.0286753
COIL	-0.523862	0.0403271
SLC35B4	-0.523546	0.0390195
HTATSF1	-0.522952	4.63e-06
BACH2	-0.522676	0.0150587
SKA3	-0.522478	0.0371977
CAPRIN1	-0.522323	0.0150543
SRPK1	-0.522291	0.0307736
PWWP2A	-0.522138	0.0494848
PEX1	-0.520717	0.0113058
GUCY1B1	-0.520482	0.0235994
XPO7	-0.520392	0.0280269
HTD2	-0.519364	0.0404087
CALU	-0.518358	0.0359654
LOC122421112	-0.518217	0.0123706
STK39	-0.518111	0.0210607
CBFA2T2	-0.517862	0.00322845
PHKA1	-0.517131	0.0211597
PRPS2	-0.516953	0.0473034
INSR	-0.515796	0.0184298
YEATS2	-0.515784	0.0399607
GMPS	-0.51521	0.00820662
IRF4	-0.514647	0.0426952
SPIRE1	-0.514047	0.0236064
TFCP2	-0.513725	0.00128191
NCBP1	-0.512676	0.020655
USP47	-0.511933	0.0455196
MPHOSPH9	-0.511538	0.0264511
STX16	-0.510591	0.0443959
ZBTB2	-0.50867	0.0286975
DHX57	-0.507982	0.00291489
CHEK2	-0.506895	0.0276371
TOMM70	-0.506803	0.00526935
ELP4	-0.505024	0.0438152
LPIN1	-0.504986	0.0205466
POLA1	-0.504452	0.0402265
SHLD2	-0.503706	0.0162842
PDE7A	-0.503607	0.0247947
DHX36	-0.50322	0.0224349
FOXO1	-0.502019	0.000616417
LOC122445234	-0.499372	0.0110582
LOC122420283	-0.499207	0.0328034
MORF4L2	-0.497128	0.0284314
BRD1	-0.49519	0.0269422
CAPN7	-0.494279	0.0417148
KPNA4	-0.494238	0.0496182
PRPF40A	-0.49421	0.0278455
SFXN1	-0.493465	0.0238716
CSTF3	-0.491317	0.0295757
NAA15	-0.491224	0.0434897
SIK2	-0.49025	0.0121755
SPG11	-0.489749	0.0263828
PSPC1	-0.489723	0.011957
KLHL6	-0.489212	0.0191723
GOLGA4	-0.488997	0.0160167
BAG5	-0.488655	0.0115279
DHX9	-0.488412	0.0472715
PSMD12	-0.488321	0.0408571
MMUT	-0.487517	0.0358583
COPS4	-0.487197	0.0141758
CCDC47	-0.486585	0.0375002
ARL6IP1	-0.486171	0.0395842
CENPJ	-0.485667	0.0241745
ALDH5A1	-0.484863	0.0298381
TBCK	-0.48353	0.0282475
KHDRBS1	-0.482512	0.0127759
CD80	-0.482202	0.0463496
DPP4	-0.481849	0.0340049
ATIC	-0.481794	0.0165071
SLC4A8	-0.480688	0.0323884
SEC24D	-0.479878	0.00277308
ZNF318	-0.47807	0.0190377
DNAJC16	-0.477987	0.0458182
ZNF189	-0.477038	0.044812
NNT	-0.476748	0.0428775
UHRF2	-0.475958	0.0409805
EIF2AK4	-0.469792	0.0112938
CHAMP1	-0.468707	0.0411002
TMEM263	-0.468046	0.0411768
CDCA7L	-0.466014	0.0453326
TNIK	-0.465678	0.00135205
YME1L1	-0.465527	0.0135224
PHF3	-0.464374	0.0227444
GLUD1	-0.464366	0.0175192
ALDH6A1	-0.463733	0.00856707
LOC122451962	-0.46324	0.0454302
CCNT1	-0.463039	0.0251276
EPB41L2	-0.462269	0.020718
ETF1	-0.460115	0.0323884
UTRN	-0.45956	0.0442824
CCT8	-0.459328	0.00543309
HSPD1	-0.457555	0.0192441
KIAA0753	-0.45744	0.0262571
ZSCAN29	-0.456846	0.0286975
DIDO1	-0.456797	0.0471864
SPTBN1	-0.45677	0.0362228
OARD1	-0.456539	0.0211597
PHF13	-0.456519	0.0176915
EED	-0.455826	0.0170936
MACF1	-0.454587	0.0398395
SPICE1	-0.454163	0.0363985
RBMX	-0.452708	0.01642
ALMS1	-0.452634	0.0122896
USP9X	-0.452311	0.0454149
LOC122446480	-0.452299	0.0388503
TRIM37	-0.451232	0.0203098
CCAR1	-0.449261	0.0227653
LDAH	-0.446355	0.0388503
PRPF4B	-0.445221	0.000413967
DDX50	-0.445103	0.0233651
TSR1	-0.443005	0.0102101
SRR	-0.442857	0.0237993
ALS2	-0.441317	0.0203098
PHACTR4	-0.441283	0.0271625
G3BP1	-0.440132	0.00920818
RRP8	-0.43891	0.0375002
CAMK4	-0.438155	0.0359654
CTNNB1	-0.437132	0.0407523
LOC122421111	-0.434482	0.0453189
MARCHF6	-0.434083	0.0197384
MTO1	-0.433937	0.0264511
ZNF512	-0.432986	0.00960933
ASB1	-0.432822	0.00433979
FASTKD5	-0.430529	0.0101796
FOXJ3	-0.429111	0.0315279
SETD2	-0.426085	0.0150494
GTF2I	-0.42418	0.017504
ABLIM1	-0.423967	0.0189123
NFATC2	-0.423858	0.00387364
NUSAP1	-0.422679	0.0476785
RNF150	-0.421431	0.0341008
ELP2	-0.421291	0.00303905
LOC122424628	-0.418547	0.0257802
GIMAP8	-0.418367	0.0279363
ATP8B2	-0.418295	0.0432488
ARHGEF12	-0.417747	0.0277673
STAMBPL1	-0.416286	0.0379253
PIK3R4	-0.416192	0.0455274
RBBP4	-0.415446	0.0455274
SOGA1	-0.41438	0.0152198
WDR36	-0.413785	0.00605366
CRNKL1	-0.412967	0.0118551
AMFR	-0.412829	0.0322651
CREB3L2	-0.410039	0.0204198
SUPT20H	-0.409277	0.0336616
NAA35	-0.409223	0.031387
DUSP16	-0.40917	0.0277578
PLCG1	-0.408662	0.0480833
NOL11	-0.408371	0.0119379
CDV3	-0.408045	0.0106942
HSPA5	-0.407939	0.0221692
ARHGAP31	-0.406766	0.0452194
NOL9	-0.405733	0.00477671
PLPP1	-0.405255	0.0127822
BPTF	-0.403932	0.0287016
IARS2	-0.402681	0.0402838
UHRF1BP1	-0.401531	0.0160167
CEP295	-0.40137	0.0419918
ANAPC1	-0.400062	0.0109358
ALDH7A1	-0.399377	0.0196998
HERC2	-0.398922	0.0403587
GOLGA3	-0.398061	0.00453875
RARS1	-0.396376	0.0307535
USP24	-0.395572	0.0183075
GTF2H1	-0.395388	0.0292817
TSHZ1	-0.395221	0.0162097
CCT2	-0.392671	0.0280785
ADAM17	-0.389893	0.0370599
HNRNPA3	-0.388756	0.00304218
ZNHIT6	-0.38767	0.0468822
NUP50	-0.387178	0.0222146
BPNT1	-0.386671	0.0327298
HPS5	-0.386314	0.0356791
LARP4B	-0.384782	0.0267886
LARP1	-0.384756	0.0209919
TPR	-0.384044	0.0243499
RFC1	-0.383194	0.012972
HSP90B1	-0.383035	0.0284253
DNAJC13	-0.381896	0.0300992
C1H17orf80	-0.381409	0.0310423
CSE1L	-0.381169	0.00401954
SOCS7	-0.378218	0.0271018
DIS3L	-0.376078	0.022459
KIAA0586	-0.375285	0.0481988
TUBGCP3	-0.371006	0.038934
XYLB	-0.370498	0.034662
LEF1	-0.368908	0.0305456
CTCF	-0.365679	0.0453326
STAT4	-0.365334	0.0458195
HAUS5	-0.363433	0.0294607
SUGP2	-0.363274	0.0388387
BCL2	-0.362472	0.0114987
POGZ	-0.361225	0.0436352
GPATCH8	-0.356776	0.0405375
ATMIN	-0.355885	0.0480815
LEO1	-0.354629	0.0372664
DDX10	-0.352477	0.0195607
RTL6	-0.348929	0.0470631
CCND2	-0.347447	0.0326165
NUP88	-0.344229	0.0485898
DDX42	-0.337702	0.00333973
EIF3A	-0.337131	0.049219
RCC1	-0.335706	0.0231167
YWHAQ	-0.33408	0.0439605
CDC5L	-0.330791	0.012225
TMEM39A	-0.326135	0.0477047
DDX46	-0.323099	0.0413098
CDC23	-0.320273	0.0485898
USP8	-0.316475	0.0427835
ESYT2	-0.313965	0.0409805
DDX21	-0.310422	0.0191723
WDR37	-0.308123	0.0288768
LOC122438706	-0.307748	0.026994
VIRMA	-0.304444	0.0240095
DYNC1I2	-0.293949	0.0412646
RIOK1	-0.292817	0.0489119
VPS41	-0.275527	0.0408571
USP7	-0.26925	0.016629
SET	-0.263438	0.0355083
C28H6orf89	-0.249762	0.0484782
OTULIN	-0.248849	0.0397579
PITPNB	-0.244347	0.0381547

## Sheet: upregulated
Supplementary Table S7 - Upregulated genes in Adults (D0xD2)
gene_id	log2fc	padj
XBP1	0.241171	0.0341008
PRMT2	0.24522	0.0448652
MTCH2	0.252346	0.0404033
SRA1	0.261511	0.0447858
PIGC	0.263011	0.015035
ATP6V0E1	0.265465	0.0413098
LOC122420886	0.271408	0.0416455
NGRN	0.276993	0.0224013
ARPC1A	0.284492	0.0220587
NKIRAS2	0.291503	0.0480171
LOC122438892	0.292218	0.0339521
SNX11	0.292498	0.0435856
LOC122427483	0.293814	0.020655
FAM131A	0.295351	0.0251276
ZDHHC24	0.311699	0.0286975
NECAP2	0.315898	0.0221482
PTRH2	0.3202	0.0285408
INO80C	0.320501	0.0442824
LMO4	0.322954	0.0403587
ING4	0.324256	0.0311469
SLC25A19	0.326794	0.0374608
ABHD16A	0.326811	0.00443007
SDHC	0.330843	0.00606318
FKBP1A	0.332863	0.0172766
LOC122448282	0.333912	0.0105249
PDAP1	0.334879	0.015757
CHMP4B	0.340626	0.0468822
SLC12A7	0.341144	0.0420619
TMUB2	0.342799	0.0249307
GPKOW	0.344536	0.0476454
TM9SF1	0.349343	0.013297
PSMB5	0.349798	0.018826
DDA1	0.350716	0.0485607
LOC122424044	0.351283	0.0205082
MED8	0.352592	0.0311198
NICN1	0.353177	0.0218533
CARD19	0.354566	0.0397341
LOC122441435	0.355771	0.0453326
ANP32B	0.35614	0.0461171
PRKAG1	0.356473	0.042168
ATP5PD	0.35746	0.0326624
BABAM1	0.362182	0.0482754
MRPL16	0.36576	0.00908509
VPS37B	0.366434	0.0265284
TRIM38	0.370433	0.0170936
TRABD	0.371379	0.0290091
TOMM40L	0.371813	0.0434122
LOC122424442	0.372419	0.034532
KIAA2013	0.373218	0.0471864
RGP1	0.375904	0.0456695
RAC1	0.375928	0.00692113
MIF4GD	0.376101	0.0172718
LOC122447612	0.378358	0.0339521
GMFG	0.379618	0.00692511
PSMA5	0.379797	0.0183075
PICK1	0.383533	0.0480833
ELOF1	0.386265	0.030795
LOC122440025	0.387132	0.00914775
SPR	0.387404	0.0289459
NAXD	0.388244	0.0363935
TSPAN17	0.388529	0.00661464
CHCHD5	0.389194	0.0405691
PSMB4	0.391624	0.0308813
ORMDL2	0.392246	0.0255694
MANF	0.392334	0.0403587
PEX16	0.392431	0.026296
ITM2C	0.393384	0.0497621
MGAT1	0.395441	0.0379531
CHMP1A	0.395521	0.0409805
ACSS1	0.395665	0.0319192
SH3GL1	0.395678	0.0366946
LOC122446364	0.396902	0.00606273
EIF4A1	0.397211	0.023505
TMEM223	0.397268	0.0369131
SLC43A3	0.397397	0.0495431
LOC122450875	0.399428	0.0271018
SDHB	0.399605	0.0293334
NSUN5	0.402938	0.0468822
PTDSS1	0.403853	0.0485965
WDR55	0.404371	0.0191418
LOC122455265	0.40553	0.0115595
BRF2	0.406388	0.0427835
RACK1	0.406442	0.0404982
SLC39A13	0.407161	0.0122322
SDHAF2	0.407161	0.00692113
TIMM17A	0.407181	0.0324944
COMMD7	0.407265	0.0200028
EIF3K	0.407389	0.0264678
DNASE2	0.409068	0.0317059
RETREG2	0.410273	0.0407099
ELOVL1	0.41059	0.0327648
COMMD4	0.411072	0.00692511
ERP29	0.411576	0.0456919
DCXR	0.412148	0.0271408
PPIB	0.413295	0.0474707
LOC122431318	0.414118	0.0341008
TRMT10B	0.415022	0.0426117
ARPC1B	0.415696	0.0189929
APH1A	0.415842	0.00266351
PRCC	0.416892	0.040439
EIF1AD	0.417139	0.0229158
LEMD2	0.41716	0.0480681
LYN	0.417378	0.0369131
SNX15	0.417758	0.0122896
RPS3	0.417792	0.0405691
ATP6V0B	0.418102	0.00835789
FIS1	0.419018	0.020718
SRI	0.420781	0.0101082
POP7	0.420807	0.0478375
CMC1	0.420812	0.0298184
RPL23A	0.421641	0.0359654
LOC122440214	0.421654	0.0191418
ABHD4	0.421897	0.0438152
LOC122431238	0.422026	0.0445923
SCARB1	0.422241	0.0495431
PCOLCE	0.422373	0.0468822
CMC2	0.422616	0.0192174
TADA3	0.423023	0.0418512
MRPL36	0.423248	0.031155
SLAMF7	0.423825	0.0468822
POLR2F	0.424047	0.0388503
PRR3	0.424201	0.0458182
TRIR	0.42494	0.0284253
MGST3	0.425176	0.0476454
BIN3	0.425806	0.00639398
TOR2A	0.427722	0.0392756
TAX1BP3	0.428593	0.042168
GPATCH3	0.429112	0.0413098
NDUFS3	0.43096	0.0318907
POLDIP2	0.4316	0.0316562
FAM3A	0.432649	0.0435856
BRMS1	0.432868	0.0481988
UBE2V1	0.433721	0.00668959
RUFY4	0.433748	0.0483743
WIPI2	0.434661	0.0417148
LOC122452418	0.434801	0.0330612
MKNK1	0.435332	0.0475431
PMEPA1	0.435384	0.0484782
PPP1R11	0.435549	0.0334015
RPS14	0.435726	0.041672
SLC66A1	0.437582	0.0473093
PSMB7	0.438254	0.0461961
ARID3B	0.439121	0.024055
SSU72	0.440281	0.0030404
AP2M1	0.440326	0.0430488
ARHGAP21	0.440715	0.0476249
TMSB10	0.441443	0.00697957
COASY	0.442011	0.0495431
SNX17	0.442398	0.0495721
MGAT4B	0.442455	0.0228963
MNT	0.442619	0.0268929
CNPPD1	0.443285	0.0409805
ARRDC1	0.44403	0.0236268
SSNA1	0.444503	0.0472135
RILPL2	0.445256	0.0211787
COMMD5	0.445729	0.0476454
CCM2	0.445812	0.0350655
KXD1	0.445818	0.0236086
MTMR14	0.446193	0.0488868
UBE2L3	0.446245	0.0169885
RNF185	0.446637	0.0191723
LOC122422557	0.447614	0.00427669
ZFAND2B	0.448088	0.0241745
UCK1	0.448308	0.0191492
SPIRE2	0.449513	0.0442824
LRSAM1	0.450019	0.0461171
B4GALT7	0.450403	0.0489119
PIN1	0.45041	0.0357541
FOSB	0.451613	0.0459317
BCAP31	0.451788	0.0441367
ERGIC3	0.451934	0.0132452
STING1	0.451966	0.021535
HYPK	0.452752	0.0323884
SELENON	0.452886	0.0417148
LOC122421476	0.452914	0.0183075
B9D2	0.453416	0.0413632
GCHFR	0.453444	0.011506
SF3B5	0.454006	0.0203098
GPANK1	0.454507	0.0382632
CLIC1	0.455162	0.011957
TEX261	0.45523	0.00439532
LAMTOR1	0.455358	0.0102371
POLD4	0.455814	0.0319192
HEXA	0.456534	0.0373436
OCEL1	0.45657	0.0472135
NFKBIL1	0.457016	0.0395119
LAPTM5	0.4575	0.00910489
SUPT4H1	0.457666	1.17e-05
WDR83	0.458166	0.0357253
RPS28	0.459702	0.0250175
COMT	0.460392	0.0402434
COPS6	0.46082	0.0477419
COPZ1	0.461883	0.0296267
MARVELD1	0.461941	0.0355083
SLC37A2	0.462227	0.0357469
TMEM208	0.462665	0.000525167
ZNRF1	0.463329	0.00662751
MRPL52	0.463339	0.0284367
CLPTM1	0.463885	0.0387442
LOC122427071	0.46556	0.0305498
ATG101	0.46689	0.0381708
HYI	0.467296	0.0102806
URM1	0.467491	0.0305589
ROMO1	0.467654	0.0253966
MRPL55	0.4681	0.0114166
PPP1R15A	0.468189	8.59e-05
DTD1	0.468724	0.0135458
HSPB7	0.468853	0.047278
PRR13	0.468893	0.0127671
RAB4B	0.469113	0.0235516
ZBTB42	0.46943	0.0136537
IP6K1	0.470025	0.0447858
LOC122429106	0.47017	0.0468822
ANAPC15	0.47056	0.0270647
LOC122425345	0.470606	0.0320656
TPI1	0.470817	0.0375284
YBEY	0.471071	0.0288768
VRK3	0.471296	0.0341008
GIPC1	0.471425	0.0126609
CARD6	0.471438	0.0257665
PREB	0.472228	0.00949526
PPP4C	0.472381	0.0284253
PPP1CA	0.472958	0.0306173
MRPL58	0.473468	0.0375002
LOC122451456	0.473495	0.0271601
RHBDD3	0.473691	0.0354578
USF2	0.474924	0.0304203
DAD1	0.475246	0.0413191
MRPL38	0.475492	0.0476249
ATP5ME	0.475677	0.0148362
RPS15	0.475934	0.0359138
MRPL14	0.476283	0.023814
LOC122432783	0.476308	0.0305671
PSMB3	0.476418	0.0284253
MAPKAPK3	0.4765	0.00853066
SLC27A1	0.476791	0.0301071
PSMC4	0.476978	0.015652
IRF1	0.477157	0.0448849
LOC122447382	0.47733	0.00612766
NDUFA12	0.477521	0.0157093
CRTC2	0.477562	0.0338928
BAK1	0.477957	0.0292817
LOC122430816	0.47908	0.00281232
RPS13	0.479903	0.0175951
R3HCC1	0.481023	0.0471183
NXT1	0.482226	0.0393615
TMEM258	0.48229	0.0413274
HCST	0.483349	0.0372814
NPHP1	0.4834	0.0236268
SMIM12	0.484299	0.0159573
CYHR1	0.484485	0.0202131
U2AF1L4	0.48533	0.0102806
AUP1	0.485545	0.0177476
PLEKHM1	0.486062	0.042496
CD151	0.486437	0.03581
DNAJC4	0.486966	0.0384331
JPT1	0.487516	0.0259533
ST3GAL4	0.488262	0.0278992
GNAI2	0.49003	0.0430488
TMEM250	0.49041	0.0192476
GEMIN8	0.490885	0.0497621
FANCF	0.491391	0.0431301
MRTO4	0.492302	0.0468822
IKBKG	0.492308	0.0426285
TOM1	0.492394	0.0455196
EMD	0.492721	0.0339521
THYN1	0.493322	0.0404982
RABAC1	0.493582	0.0336365
MRPL54	0.493624	0.00687655
PAGR1	0.493789	0.0264327
TEN1	0.494055	0.0263707
MRPS11	0.494799	0.0478375
RSRC1	0.494979	0.03581
ZNHIT1	0.495116	0.0162455
SSR2	0.495539	0.0201552
PAQR7	0.495662	0.0351203
APLP2	0.495717	0.035689
ABHD17A	0.496166	0.0222146
MPG	0.49743	0.0143231
LOC122437302	0.497482	0.0314202
NOD1	0.498137	0.0135413
MAFB	0.498599	0.0257605
OXA1L	0.499493	0.0200028
JMJD8	0.49975	0.0232412
ZNF771	0.499897	0.0458585
PFDN6	0.499928	0.0271018
DPM3	0.500761	0.0217961
ICAM1	0.500877	0.0385361
EXOSC6	0.501329	0.0239582
LOC122426519	0.501526	0.0419546
GRAMD1A	0.501529	0.0454838
ARL4A	0.501689	0.0288757
VPS25	0.501724	0.00380386
MRPS18A	0.502057	0.0109054
LYPLA2	0.502059	0.01539
LIPE	0.502598	0.0466482
MDH2	0.502663	0.0334269
TLE4	0.502804	0.0480815
SELL	0.50282	0.0133116
TMEM147	0.502964	0.0371977
ZNF768	0.503167	0.0251276
TSPAN14	0.503216	0.0251551
ENO3	0.503826	0.0456919
ELOB	0.504019	0.0359654
PROCA1	0.504341	0.0448652
COLGALT1	0.504503	0.0355083
SLC39A1	0.504573	0.000344479
ARMC7	0.504802	0.0321588
RPS6KA4	0.50504	0.0111345
LOC122431334	0.505145	0.0319192
POLR2G	0.505182	0.00300633
EIF3F	0.505829	0.0326582
SNRPD2	0.506255	0.0247987
TCF25	0.506404	0.0388503
CNR2	0.506515	0.0339006
MRPS24	0.507103	0.00490118
EIF2B2	0.507148	0.0236404
ATP5MC1	0.507647	0.0447858
HRAS	0.508212	0.0257702
RAB5C	0.508292	0.000319163
ADA2	0.508729	0.0216704
IRF5	0.508767	0.00737731
ROM1	0.509155	0.033366
HYAL1	0.50928	0.0378717
TNFSF12	0.509731	0.0124521
ARPC4	0.509732	0.00453875
ABHD14A	0.509966	0.0369131
CHMP2A	0.510548	0.0434352
TAP2	0.510797	0.0139199
MRPL46	0.5108	0.0458585
LOC122432144	0.512104	0.0244568
RPL18A	0.51215	0.0487279
RGS19	0.51225	0.00247838
LOC122428468	0.51298	0.0206013
ATF4	0.51358	9.99e-05
ARAF	0.513735	0.0123506
TMEM238	0.514122	0.0434926
JAGN1	0.514244	0.00198838
C10H20orf27	0.51513	0.0224013
LOC122420817	0.515164	0.0269894
TAL1	0.515252	0.0402348
TRAPPC6A	0.515468	0.0346181
UBB	0.515734	0.0402348
QARS1	0.515797	0.0327298
NDUFB1	0.51604	0.0255887
LOC122421039	0.516071	0.0245768
TRAFD1	0.516188	0.00903142
LOC122439826	0.516433	0.0404982
LOC122420864	0.51655	0.0293353
ATP6V1F	0.516679	0.0294648
LIN37	0.517019	0.0434926
GFER	0.517552	0.0477047
XKR8	0.51812	0.00349964
FBXO6	0.518251	0.0347109
EDF1	0.518273	0.0285408
SP140	0.518328	0.0203863
SH2B2	0.518432	0.0409805
MCRS1	0.518663	0.00522995
POLR2J	0.519973	0.0168795
PPP1R18	0.520045	0.0284498
AP1S1	0.520666	0.0166462
MTCH1	0.52088	0.0156001
PLEKHM2	0.520936	0.031155
CYREN	0.521234	0.0370198
DHPS	0.521649	0.0249745
SYNGR2	0.521753	0.00525125
LOC122451787	0.52203	0.0243967
PI4KB	0.52255	0.0176176
LOC122446436	0.522626	0.0292948
VIM	0.523417	0.0238716
SLC25A38	0.523495	0.0166407
NAA10	0.523835	0.0345771
LOC122434165	0.523913	0.0276517
TP53I3	0.524108	0.0306573
PYM1	0.524272	0.0300198
AMDHD2	0.524557	0.0266973
LOC122420192	0.524646	0.0340887
CD68	0.524778	0.02778
EXOSC4	0.524854	0.0367752
UBE2F	0.524917	0.041672
LIMD2	0.525469	0.0144421
S100A5	0.526642	0.0458182
SIRT3	0.527321	0.0307736
LOC122421177	0.527945	0.046086
SMG9	0.528012	0.0454149
IRAK1	0.528374	0.0293204
NRM	0.528392	0.0191723
TPRA1	0.528937	0.0486978
RPS26	0.530237	0.0102571
GFUS	0.530358	0.0228963
EEF1G	0.530473	0.0296423
RAB1B	0.530508	0.0373118
NTAN1	0.530516	0.00899823
LOC122421341	0.530712	0.00817218
MRPL12	0.531251	0.0286975
CCDC69	0.531282	0.00541166
LOC122445907	0.531418	0.0084393
MEFV	0.531451	0.0226847
ECI1	0.532524	0.0471298
ATP6V0C	0.533846	0.0191723
GBA	0.534047	0.0158544
NDUFB10	0.534204	0.0122896
MRPL43	0.53467	0.0173184
RFXANK	0.534944	0.0112323
TFEB	0.534995	0.0354466
CORO1A	0.535093	0.0432482
PCIF1	0.535579	0.0417148
NPEPL1	0.535855	0.0329416
IMPA2	0.536422	0.0322651
DCTN3	0.536579	0.0183075
TRAPPC5	0.536773	0.0204935
EHD4	0.537097	0.0173852
SEMA4D	0.537677	0.0189123
SLC35F6	0.537895	0.00430449
GPR137	0.538099	0.0435474
LOC122454846	0.538756	0.00697957
HIGD2A	0.539107	0.0205954
P2RX1	0.539151	0.0323884
PRKD1	0.539258	0.0344647
NEDD8	0.539499	0.00697957
OTUB1	0.539666	0.0307736
LOC122438821	0.539814	0.0420338
LOC122426640	0.539862	0.0284253
MYDGF	0.540144	0.0196479
PPP1R37	0.54016	0.0264289
TXNL4B	0.54017	0.0333935
YPEL3	0.540396	0.0112938
NANS	0.54086	0.0497528
NFKB2	0.541367	0.0453014
PIGL	0.541373	0.0271018
AHCY	0.541519	0.0151802
TAF10	0.541846	0.0244521
DMAC2	0.541862	0.0458824
LOC122450846	0.54195	0.0412646
LOC122424937	0.542002	0.0417148
GALK1	0.542401	0.0330612
AKR1A1	0.542791	0.0403941
GUK1	0.542935	0.00595628
MFSD12	0.542954	0.0217866
TMEM63A	0.543346	0.0224572
RRP1	0.544316	0.029013
EMP3	0.544838	0.0333291
HM13	0.545314	0.0201552
FKBP2	0.546369	0.0294648
LOC122429552	0.54717	0.0176306
CCDC167	0.547934	0.042496
ITPK1	0.547939	0.0366946
RALBP1	0.547981	0.000781755
SCNM1	0.548017	0.00606318
RPL18	0.548274	0.0127671
PKN1	0.548393	0.0293259
SDF4	0.548635	0.00473157
ADAP1	0.5487	0.0228433
HMCES	0.54883	0.0079659
MLYCD	0.549535	0.0150543
AP5S1	0.550589	0.0092206
PCSK7	0.551352	0.018236
BCKDHA	0.552127	0.0200071
CARD9	0.55244	0.044372
NDUFA8	0.553176	0.00216258
DTX2	0.553308	0.0351306
MRPS34	0.55347	0.0133655
LOC122429686	0.553564	0.00365357
LSM2	0.553877	0.00984509
SNAPC2	0.554218	0.0227653
AAR2	0.554271	0.0404033
MED19	0.554386	0.00794711
RASSF4	0.554888	0.0306456
LOC122448243	0.555379	0.0455196
PARD3B	0.555801	0.0299562
SLC35C2	0.556141	0.00972732
MICOS13	0.556236	0.0299421
PLD4	0.556319	0.0414016
CEBPE	0.556335	0.0363985
PLP2	0.556404	0.00160411
GHDC	0.557253	0.0044029
SNF8	0.557407	0.0130586
LOC122441380	0.557919	0.00928204
LOC122434981	0.558298	0.0476454
RAC2	0.559133	0.0335462
BATF	0.560051	0.0411215
ZFPL1	0.56021	0.0235301
ABHD1	0.560214	0.0206377
ARHGDIB	0.560281	0.0277673
COMMD1	0.560946	0.0202512
RARG	0.5612	0.0271018
PARVG	0.561479	0.0432597
IBA57	0.561485	0.0482526
RPS12	0.562669	0.0240796
CFL1	0.562839	0.0221692
RPLP2	0.562963	0.0276218
DYNLRB1	0.563065	0.00485006
TNFAIP8L2	0.563147	0.00812909
MTX1	0.56361	0.0334982
FAM234A	0.564243	0.0276218
LOC122426335	0.564595	0.0324635
FAM174C	0.564611	0.0191723
LOC122431143	0.564655	0.0257964
PGS1	0.564879	0.0114987
CRY2	0.565305	0.0286614
FAM32A	0.565404	0.00427669
RPL8	0.566024	0.0384331
DNASE1L1	0.566361	0.0141201
MFSD5	0.567065	0.00410184
AURKAIP1	0.567308	0.0156216
SLC25A6	0.567551	0.0123241
MOB2	0.568088	0.0394691
AKT1	0.569072	0.0114079
LOC122440291	0.569197	0.0134476
UBL5	0.569243	0.000561855
PTPN18	0.569486	0.0247283
PSMB2	0.570169	0.0380867
MLF2	0.570317	0.0153613
C6H14orf93	0.570911	0.0209919
ENG	0.571158	0.0443102
MYD88	0.571783	0.0192441
SOWAHD	0.571811	0.0204198
PSMB10	0.572038	0.0497621
CIDEB	0.572333	0.0205002
TMEM205	0.572364	0.0176516
CSTB	0.572447	0.00215189
PSMG4	0.572569	0.0294804
FERMT3	0.572901	0.0238654
LOC122447928	0.573008	0.00136056
CD81	0.573625	0.0169885
LOC122441834	0.57458	0.0434926
LOC122423300	0.575069	0.0316562
BRI3	0.575355	0.0127751
RPL36	0.57543	0.0234847
CHID1	0.575929	0.0336365
HMG20B	0.576277	0.0257964
KDELR1	0.576427	0.0158044
LOC122435388	0.576431	0.0358321
PMM1	0.576799	0.0294804
G6PC3	0.576897	0.0420338
TIMP1	0.577102	0.041008
SMIM29	0.577451	0.0183075
SLC25A28	0.577502	0.00016251
OLIG1	0.577779	0.0301599
METTL26	0.577791	0.0286975
RTF2	0.577978	0.00358775
SPHK2	0.578031	0.0174258
TMEM222	0.578266	0.0144531
ACOT8	0.578613	0.0162813
MTLN	0.578727	0.0372221
GET3	0.579525	0.0293238
TNIP2	0.579735	0.0402348
PRELID1	0.580423	0.00155131
LOC122420491	0.580863	0.00176743
INPP5K	0.581183	0.0348982
KRTCAP2	0.58151	0.0241745
MRPS25	0.58175	0.0132147
SMDT1	0.582273	0.00203647
LCMT1	0.58231	0.000544778
EIPR1	0.582424	0.0285408
CLN3	0.58255	0.00227366
ANAPC11	0.582642	0.0205082
STK40	0.582981	0.0359654
COMTD1	0.583384	0.0311469
RNF181	0.583695	0.00551522
ABCA3	0.584188	0.0416726
ARSA	0.584588	0.0235301
DUSP2	0.584681	0.0244907
ALDH3B1	0.584827	0.0284253
LOC122420260	0.584931	0.0329689
DYNLL1	0.585114	0.00315803
LOC122439670	0.585537	0.0301081
TRAPPC1	0.585668	0.0131808
MRPL28	0.586569	0.0281776
DTNBP1	0.586574	0.00241729
CTDSP1	0.586862	0.0202058
PYCR3	0.587049	0.0184298
LAMTOR4	0.587202	0.0160167
TBC1D2	0.587985	0.0348982
SERF2	0.588034	0.00480159
ATP5MC2	0.588184	0.00687655
SNX33	0.588279	0.0404033
ASRGL1	0.588323	0.0115788
AIF1	0.588461	0.023814
CHMP4A	0.588485	0.0158044
USF1	0.588668	0.00160411
SLC25A29	0.588949	0.0390356
RPL21	0.589141	0.0141117
SLCO3A1	0.589787	0.00692113
LAMP1	0.589884	0.00244004
MRPL24	0.590237	0.00854447
SYS1	0.590415	0.00056548
RPL29	0.59049	0.0235301
TMBIM1	0.590539	0.00136056
MANBAL	0.591063	0.0226847
STX11	0.59155	3.14e-06
TP53I11	0.592194	0.0246633
PLEKHO2	0.592805	0.0183075
UNC119	0.592876	0.000684524
COPE	0.593718	0.0276718
TEX264	0.59399	0.0312707
GNA15	0.59458	0.0137564
LOC122427509	0.595956	0.000908399
LOC122429181	0.5964	0.0282475
FUT7	0.597049	0.00511004
VAMP8	0.597308	0.00126169
BAG1	0.597701	0.00821885
CLEC3B	0.597812	0.0486736
NABP2	0.599254	0.00240793
LOC122426642	0.599641	0.0375002
LOC122432541	0.599678	0.0129983
TMEM219	0.600235	0.000523926
POLR2L	0.600735	0.0140902
RHOC	0.601044	0.0132147
YJU2	0.601165	0.0183075
TXN2	0.602171	0.0079659
MMP14	0.603164	0.0339267
ZNF580	0.603694	0.0446288
MRPL40	0.603864	0.0288752
TP53RK	0.603916	0.0123241
NDUFS7	0.603949	0.0127795
RNASEK	0.604362	0.0280269
VAMP5	0.604421	0.0243259
WBP2	0.604663	0.0236268
MVB12A	0.604818	0.0375002
LOC122455127	0.604978	0.00960933
CD74	0.605456	0.0468822
GRIPAP1	0.605652	0.0255251
ALDOC	0.605667	0.0480486
EPN1	0.605962	0.0374408
PLIN2	0.606973	0.0225249
BAX	0.607682	0.00554979
SLC16A3	0.60853	0.0457333
UBXN6	0.608791	0.00511004
LOC122421171	0.609231	0.0391431
MED29	0.609812	0.0413098
CSNK2B	0.609961	0.0123811
LOC122429902	0.610191	0.00737339
VKORC1	0.610207	0.0203112
SEMA4A	0.610284	0.00880432
LRCH4	0.610501	0.011366
CUTA	0.612031	0.0112938
SELPLG	0.612418	0.0166162
LOC122444708	0.613045	0.0112323
IL17RC	0.613295	0.0179493
C1H17orf49	0.614043	0.0428667
TFE3	0.614303	0.00176743
AP5B1	0.614395	0.0226082
PLOD1	0.614671	0.0243967
METRNL	0.614683	0.0110582
LOC122426558	0.614832	0.0182679
TMED3	0.616428	0.0010535
VPS51	0.617139	0.0325417
ZBED1	0.61722	0.0250175
SLC66A2	0.617538	0.0154011
SLC25A1	0.618023	0.0362053
DRAP1	0.618355	0.00982625
ABHD11	0.619173	0.0420076
NDUFA13	0.619487	0.0280269
DPP3	0.619977	0.0175951
CNPY3	0.620128	0.0386858
EGLN2	0.620278	0.0102761
ARAP1	0.620288	0.00991988
LSP1	0.620627	0.0409805
HCK	0.620812	0.0209749
WASHC1	0.620893	0.0292817
CENPB	0.621426	0.00748131
FBXW5	0.621631	0.0300819
ATP5F1D	0.624241	0.0196986
ALG3	0.624506	0.0417148
ZDHHC12	0.624565	0.00227366
PAXX	0.624631	0.0212475
CNDP2	0.624932	0.025031
ARSG	0.62513	0.0161374
MED11	0.625309	0.0404033
GNB2	0.625673	0.00369151
HCLS1	0.625955	0.0175716
HAAO	0.626365	0.0143161
PLEKHO1	0.627106	0.0210063
LOC122441988	0.627194	0.0235146
MAP3K11	0.627324	0.0408571
SSR4	0.628141	0.0113597
PEF1	0.628556	0.0106957
LOC122420232	0.629121	0.0195705
ABHD8	0.629136	0.000633454
TNIP1	0.629165	0.0388336
SEMA7A	0.629433	0.00474554
LOC122432742	0.630787	0.0456919
TKT	0.631864	0.0339521
LOC122424708	0.632309	0.0480815
CSRP2	0.63244	0.0228963
CCDC124	0.632757	0.0426285
SELENOW	0.63344	0.0216487
SIRT6	0.633604	0.0115489
MCRIP1	0.634831	0.00976949
COPS9	0.635354	0.0100628
CORO1B	0.636972	0.00982625
MOSPD3	0.637494	0.00400594
NDUFB7	0.638839	0.00639398
UBAP1	0.639713	0.00110133
LOC122432984	0.639775	0.0287918
CTSH	0.639799	0.000885966
TNFRSF1A	0.640723	0.00528597
XPO6	0.64086	0.0152198
FDX2	0.641026	0.00365357
SPTBN2	0.641749	0.0123706
ATP5MJ	0.641905	0.00201272
CNKSR3	0.641934	0.0300978
LOC122433864	0.642276	0.00809041
PQBP1	0.642557	0.0253966
TMEM141	0.642821	0.0128186
XPNPEP2	0.642861	0.0320661
PRR5	0.64366	0.0177173
ACAA1	0.643946	0.00554437
MON1A	0.644679	0.0344647
PMPCA	0.644817	0.0158628
RNPEPL1	0.645379	0.0350937
SH3GLB2	0.645826	0.00972732
CD101	0.646173	0.0495743
LMF1	0.646273	0.0287702
CYTH2	0.646637	8.77e-05
CDIPT	0.647706	0.00606318
RPL10	0.647976	0.00312719
C29H11orf24	0.648819	0.0145402
CAMKK1	0.649242	0.0404033
LOC122419897	0.650215	0.0241422
NDUFB11	0.650564	0.0143889
VAT1	0.651301	0.00612766
RPS19BP1	0.654265	0.00241344
LOC122443181	0.655309	0.00456874
UBALD1	0.655518	0.0327298
RPL36AL	0.656098	0.00295949
LOC122428908	0.656101	0.0112323
ARID5A	0.65628	0.0347393
RBM42	0.656319	0.0179375
MVD	0.657101	0.00908509
POLR2I	0.658104	0.0123811
CEBPD	0.658149	0.0243967
STXBP2	0.658428	0.0238716
ANK3	0.661083	0.0212312
MAGIX	0.661416	0.0235301
TAP1	0.663244	0.000344479
STRN4	0.663928	0.0196998
MSRB1	0.664319	0.0414826
COQ4	0.665301	0.0161374
ZNF282	0.666024	0.00380033
CIB1	0.66652	0.00145048
LOC122446168	0.666844	0.00306928
DHX34	0.667088	0.0413098
TRMT61A	0.667525	0.0455274
PSMB9	0.667648	0.0135767
MOB3A	0.667865	0.0160594
CLTB	0.668549	0.0145375
SERPINE1	0.668614	0.0357254
ASPSCR1	0.668801	0.00856707
ISYNA1	0.669489	0.0359654
PAQR4	0.670086	0.00794711
ZNF710	0.670105	0.00227088
PTGS1	0.673186	0.0392209
NT5M	0.673204	0.0206013
CDC42EP2	0.673383	0.0387442
RAB43	0.67422	0.00511004
BAD	0.674621	0.00269018
PTK2B	0.674761	0.0107856
ZCWPW1	0.674882	0.0362423
TGFB1	0.675183	0.0192174
LOC122421467	0.675329	0.00897926
NDUFB9	0.675752	6.29e-06
SPATS2	0.675871	0.0142865
C4H19orf53	0.676546	0.00568019
CD79B	0.677261	0.0435856
ARL2	0.679474	0.0427307
LOC122430153	0.680313	0.0332109
LZTS2	0.681025	0.0263022
MAGI2	0.682119	0.0130586
PRAM1	0.68358	0.0443102
EMILIN1	0.684578	0.0194871
TCTA	0.685042	0.0035284
KAT2A	0.685087	0.0343131
HIP1R	0.685218	0.0363935
SHISA5	0.685357	0.0160167
SIGLEC5	0.685542	0.00405111
TMEM86A	0.686489	0.00244004
PSTPIP1	0.686699	0.0132512
LMBR1L	0.686809	0.000156464
CLCN4	0.686867	2.11e-05
LOC122454841	0.687247	0.0116038
RPLP1	0.688138	0.00234512
HOMER3	0.689078	0.0294607
CMTM7	0.689343	3.64e-07
MAPRE3	0.68963	0.00982043
NFKBIB	0.689739	0.0295232
MINDY4	0.690169	0.0480815
LOC122431193	0.690456	0.0209373
SLX1A	0.690479	0.0486736
SPHK1	0.6905	0.0140902
CFAP410	0.691333	0.00487804
SLC2A6	0.691665	0.0107567
LOC122427482	0.691944	0.0166331
ENGASE	0.693009	0.0256732
GPR108	0.69378	0.00108033
PGLYRP2	0.694794	0.0125553
LOC122438520	0.695056	0.00283954
C32H7orf50	0.695444	0.0277673
IFNGR2	0.696356	0.00606318
LOC122426554	0.696469	0.0162917
LOC122454546	0.697372	0.0249949
RPL28	0.697987	0.0122896
ALDOA	0.698252	0.0205694
TMEM120A	0.698666	0.0107888
COMMD9	0.698802	0.0171573
PSENEN	0.698917	0.0183514
SMPD1	0.69948	0.00873918
LOC122449879	0.699667	0.0417148
DAPK2	0.700094	0.0299421
PRDX5	0.700348	0.0142076
PPDPF	0.700616	0.00575406
CHCHD10	0.700932	0.0363935
LOC122420998	0.701504	0.0246633
NCF4	0.701537	0.00238132
MOB3C	0.702465	3.31e-05
GUCD1	0.702739	0.00153918
EHD1	0.703349	0.0251551
SESN2	0.704125	0.00994904
TALDO1	0.705418	0.00561066
GATD1	0.7062	0.000296331
G6PD	0.706222	0.0285378
LOC122434991	0.708125	0.0277578
CPPED1	0.709286	0.0404982
TREML2	0.709406	0.0210063
MAPK3	0.709967	0.00285557
TBC1D10B	0.710458	0.00528597
BLOC1S1	0.710994	0.0110508
ARHGAP26	0.711387	0.00121024
C2H1orf162	0.713626	0.000538368
PGGHG	0.714378	0.000413967
PGLS	0.716731	0.000353067
IGFBP6	0.716839	0.034545
LOC122440232	0.717179	0.0109358
ATOX1	0.718129	0.000255403
SLC14A1	0.718222	0.0372221
LOC122448416	0.719808	0.0395351
PCK2	0.720806	0.0123706
HK3	0.721906	0.00763824
BCL2L12	0.723236	0.00906856
LGALS1	0.724105	0.0223841
RAMP2	0.724188	0.0113146
TG	0.72424	0.0205302
C29H11orf68	0.724822	0.00472463
SEMA4G	0.725891	0.0173852
EBI3	0.726165	0.0115453
CYTH4	0.726191	0.00667249
RPL14	0.72686	0.0123241
PLBD2	0.726921	0.0156994
RERE	0.72748	0.00670799
NDRG1	0.728142	0.00658101
LY86	0.728314	0.030795
ZNF524	0.729846	0.00979631
CASP1	0.730674	0.00400594
FXYD5	0.732322	0.000399084
LOC122425503	0.732367	0.0201992
LOC122421209	0.735451	0.00439532
PDLIM1	0.73633	0.0468822
LOC122435198	0.736818	0.000477101
CD37	0.736929	0.00912233
TOR4A	0.737493	0.0322379
C1R	0.738573	0.00424194
MPP1	0.738719	0.0102986
IER5L	0.738737	0.0269047
WDR83OS	0.73923	0.000379929
NMI	0.739296	0.00697957
NDUFS8	0.740004	0.00476258
DYNLT1	0.740078	0.0102761
P2RY13	0.741424	0.00597397
SLC35E4	0.741786	0.020816
STARD5	0.742264	0.000214961
RHBDF2	0.742274	0.00303826
TREM1	0.742487	0.0292948
HEY2	0.742841	0.0276371
JDP2	0.742857	0.0150543
KCNK12	0.742939	0.0363732
CAPG	0.743202	0.0132452
LOC122426789	0.744458	0.0240095
P2RY6	0.74481	0.0481988
VASH1	0.74701	0.0473691
NIBAN3	0.747401	0.0235146
ACHE	0.747421	0.00981098
C4H19orf38	0.747704	0.0470631
DCAF11	0.749324	3.43e-05
DEDD2	0.749866	0.0033828
C13H1orf115	0.751236	0.0474425
AIG1	0.751294	0.0165071
CHST13	0.753132	0.0476454
TNFAIP2	0.75349	0.00150961
UBL7	0.753768	0.025735
LOC122420101	0.754158	0.0216684
STX8	0.757216	0.000523926
LRMDA	0.75749	0.000467865
SH3BGRL3	0.758296	0.00519731
PNPLA2	0.758481	0.0292817
DOK2	0.759112	0.00161288
FDXR	0.759122	0.00405111
PRICKLE3	0.760538	0.00136354
CD300LF	0.761051	0.0250175
LOC122434135	0.761602	0.00466447
EHD3	0.76216	0.0288768
TMEM229B	0.762307	2.88e-05
CD177	0.762733	0.0473691
MISP3	0.763917	0.0112751
FITM1	0.764651	0.00405111
ATP6V0D1	0.76557	0.00132646
BOLA2B	0.765956	0.0167087
CACNA1A	0.767604	0.00303826
P2RY11	0.768709	0.0340608
ATF3	0.768972	0.0225249
UFSP1	0.76962	0.0102379
GPSM3	0.769822	0.00940393
SAYSD1	0.7699	0.00265445
SLC2A8	0.770516	0.00247401
NAPA	0.771407	0.00526935
WDR25	0.771655	0.00287877
MYL6B	0.772322	0.0405111
SLC49A3	0.772649	0.00400594
WARS1	0.772654	0.0417148
STARD10	0.772842	0.0472715
LMNA	0.773368	0.0292948
MPV17L2	0.774058	0.0132452
RRAS	0.774875	0.000782366
LOC122452302	0.77576	0.000561921
LRRC28	0.776221	0.0102806
DPM2	0.776635	0.000333849
GRN	0.776677	0.00632606
RIN3	0.777524	0.0300978
C1H17orf97	0.778139	0.0203098
DHH	0.778277	0.0281285
SNRPG	0.779351	0.000295559
ITPKC	0.779704	0.0322651
TENT4B	0.77971	0.00288473
HSD3B7	0.781103	0.000460453
HCAR2	0.782214	0.0343131
GAS2L1	0.782838	0.00648751
LOC122429603	0.783956	0.0399781
PGAP2	0.784013	4.91e-05
COTL1	0.786425	0.00528597
ARG2	0.787127	0.00982625
LOC122433947	0.787598	1.27e-05
PTMS	0.787871	0.0122322
LOC122431080	0.790233	0.00984801
NDUFA3	0.792295	0.0420409
LOC122449044	0.792647	0.0301057
LOC122423218	0.792907	0.00227088
MAD2L2	0.792947	0.00574554
FES	0.793511	0.015828
UBA52	0.794924	0.0418512
LOC122432901	0.795118	0.0238839
BCL3	0.796965	0.00427669
LOC122425620	0.796978	0.000585477
TTLL11	0.797627	0.00243335
TJP2	0.798273	0.000452427
PDE3A	0.798529	0.0169885
FGR	0.799354	6.91e-05
ECM1	0.800095	0.00332349
HDAC11	0.800369	0.00687655
HDAC5	0.800474	0.00403407
DOK3	0.800605	0.0433423
GAPDH	0.803854	0.00150961
ABCB9	0.804112	0.00103727
SERPINC1	0.805396	0.0250196
LOC122426659	0.808312	0.0128721
MAP1LC3A	0.809251	0.0103898
USHBP1	0.809301	0.00022763
LOC122449423	0.810454	0.0423028
LOC122451704	0.811281	0.0310838
KCND1	0.811869	0.0213993
TSPAN32	0.81456	0.0156001
APOBR	0.814804	0.0259535
ETV6	0.815343	0.000358406
ZYX	0.816077	0.0154011
LAG3	0.817059	0.0408571
HCFC1R1	0.817385	0.0162688
UNC93B1	0.817556	0.00022216
DHRSX	0.818797	0.0011359
CSF1	0.819686	1.27e-05
LOC122442515	0.821244	0.0223581
BST2	0.82399	0.0236268
ISM1	0.824523	0.0328587
PSD3	0.825071	0.0430488
C13H1orf21	0.825675	0.0113597
LRP10	0.826208	0.000657293
RIMS1	0.826385	0.0250175
LTBR	0.82707	0.000546168
USP25	0.827573	0.000889018
PSMB8	0.828475	0.00013539
TTYH2	0.829155	0.000413568
LOC122429593	0.829648	5.22e-12
ST6GALNAC4	0.830216	0.013256
PTK6	0.830443	0.0182101
LOC122452136	0.830979	0.00198782
RELB	0.831281	0.00594262
LOC122453853	0.832302	0.0272362
LOC122440231	0.832673	0.00122268
ZNF385A	0.833813	0.0123241
IL15RA	0.833873	0.00389326
TDRD10	0.834159	0.0120824
UBTD1	0.835978	0.00797341
IFI30	0.837312	0.000638039
COL26A1	0.838561	0.0128238
LOC122433435	0.839623	0.000762071
APOBEC3B	0.839659	0.00478197
NBDY	0.840083	0.00401446
LOC122438195	0.84057	0.0152198
IRF3	0.842768	0.00707203
LOC122438238	0.843164	0.0157093
SPI1	0.84462	0.000523926
MMP19	0.844635	0.00288473
LOC122426637	0.845766	0.00753037
ENHO	0.848003	0.022684
ILK	0.848638	0.00376615
KIAA0754	0.849508	0.0460237
NUDT8	0.850445	0.0247947
LOC122433036	0.850833	0.00158849
RAB8A	0.852334	0.00211178
LRP3	0.852616	0.0283534
SMTN	0.852743	0.0201992
GPX1	0.85461	0.0129033
GADD45G	0.854744	0.0112323
DDAH2	0.854834	0.0414878
CYSTM1	0.855956	2.11e-05
EIF4EBP1	0.856227	0.00695599
CREB3L4	0.856938	0.0163864
FCGR2B	0.8589	1.81e-06
LOC122440910	0.859617	0.00122268
CAPNS1	0.861717	0.00424194
TGFB1I1	0.861719	0.00227366
BBLN	0.861806	0.00165828
NINJ2	0.862918	0.0270457
LOC122441757	0.862959	0.00466447
ROGDI	0.863255	1.58e-05
SLC6A9	0.863671	0.0196986
RHOG	0.865907	0.00477132
CLYBL	0.866501	0.0152198
NFE2	0.867961	0.0405995
LOC122439040	0.86951	0.0484782
ABCD1	0.876148	0.00135205
LOC122430839	0.876834	0.0341008
TTYH1	0.881989	0.000308477
TRIM56	0.886351	2.08e-06
LOC122451081	0.886495	0.013728
LOC122450370	0.886764	0.00203647
ISOC2	0.8877	0.00439532
LILRA5	0.888447	0.0112323
LOC122450939	0.888592	0.00427669
LOC122446062	0.88996	0.000929167
RBM43	0.890026	0.000493571
ETHE1	0.893764	9.2e-06
LOC122436914	0.894781	0.00354676
RNF114	0.897341	6.74e-11
PEMT	0.897963	0.00233726
TMEM40	0.898084	0.0156001
NKD2	0.898459	0.042496
ERICH4	0.898575	0.0457333
RBPMS	0.898576	0.00389326
LOC122421250	0.898595	0.00022216
LOC122431658	0.898999	0.0246729
RBCK1	0.899325	0.00121024
SQOR	0.899649	7.33e-06
LOC122436717	0.900596	0.00472463
SELENOM	0.90206	0.0428374
GSDMD	0.904704	0.000303719
LOC122421185	0.90506	0.0238839
FTL	0.905319	0.000497391
F11R	0.908128	0.0021059
TDRD7	0.908239	1.18e-05
LOC122442464	0.908289	0.0102371
ADAM15	0.909068	0.0173537
TSPO	0.90996	0.000781755
S100A4	0.910326	0.000688538
NFKBIA	0.911577	0.00410184
CALD1	0.914795	0.0275072
GTPBP2	0.915335	2.66e-09
LOC122426577	0.917249	0.00383022
LOC122442443	0.918305	2.8e-05
NFAM1	0.92317	0.00172969
SLC15A3	0.923639	0.000283398
IDO1	0.924814	0.0204198
SSTR3	0.927032	0.0356811
ADORA2A	0.927892	0.0145375
DDIT3	0.927911	8.65e-05
S100A11	0.929564	0.00257938
SLC24A3	0.930023	0.0191723
LOC122421996	0.930451	0.0276718
SAG	0.930817	0.0202512
SYN1	0.931698	0.011957
C11H11orf96	0.932307	0.00522995
TCN2	0.932994	0.000726191
PSME2	0.933281	0.000128767
PLEKHG3	0.93561	2.33e-05
FUOM	0.936626	0.00134933
RASGRP4	0.937292	0.00554979
LOC122428204	0.939783	0.0044029
RAB33A	0.940049	0.0411002
LOC122448005	0.940701	0.0170936
LOC122442365	0.940802	0.0379105
LOC122452146	0.942295	0.0427835
TASL	0.942301	0.00241729
DPEP1	0.943065	0.0398912
LAMTOR2	0.943417	3.06e-07
PSME1	0.943594	1.55e-05
ABHD12	0.946572	0.00265025
ARHGAP28	0.946852	0.0112938
ZDHHC3	0.948468	4.99e-07
PDLIM4	0.94896	0.0418695
NFKBIE	0.950424	1.06e-05
FGD2	0.950489	3.79e-05
SYN2	0.950509	0.0102986
LOC122437893	0.957015	0.0485898
TOR3A	0.960445	1.83e-06
MUC6	0.960679	0.0344182
GADD45B	0.961654	0.000136874
PAX8	0.965324	0.0251464
SH3BP2	0.965869	0.000144415
LOC122441684	0.968447	0.00835789
LOC122445080	0.970413	0.0162917
SNX21	0.970756	0.0352596
AVIL	0.970817	0.0148362
ABTB1	0.973996	0.000464896
LOC122449950	0.974327	0.0280097
CTSZ	0.974951	2.27e-05
IGSF8	0.976173	0.00322632
LOC122443316	0.977636	0.0497065
DHRS3	0.979157	1.56e-07
LOC122444442	0.983696	0.0402589
RAB38	0.98379	0.0338802
LOC122454755	0.986849	0.0375002
NR1H3	0.988012	3.31e-05
CUEDC1	0.990272	0.000109639
ZNF205	0.992054	0.0102101
STAT1	0.992258	2.46e-05
NRL	0.992395	0.000255403
NINJ1	0.999123	4.66e-05
SERTAD1	0.999192	0.00211761
MOV10	0.999642	0.00481842
LOC122439324	1.00016	0.00234636
STAT2	1.00088	0.000695471
LYPD8	1.00735	0.00250122
LOC122436913	1.00825	1.14e-05
AAMDC	1.00978	0.000191818
LOC122441138	1.0132	0.0472652
MXD4	1.01478	1.01e-05
PDLIM7	1.01498	0.00139375
TREX1	1.01866	0.000523926
SP110	1.01966	0.000538947
AP1M2	1.02003	0.000224656
NCF1	1.02273	0.000545815
IL27	1.02698	0.000867443
TCIRG1	1.03025	1.62e-05
RTN2	1.03049	6.35e-06
ZNF821	1.03214	0.000860543
LOC122431087	1.03326	0.0195614
DRAM1	1.0348	0.00104489
LOC122425812	1.03626	0.0087184
UPP1	1.03732	0.0176915
IQCD	1.04425	0.00247838
TRIM25	1.04985	6.29e-06
RPS6KL1	1.04987	0.00034627
LOC122455063	1.05046	0.00122816
HSPB1	1.0507	0.000255777
TREML1	1.05131	0.0104477
RNF19B	1.05135	6.29e-06
CD164L2	1.05621	0.0174258
FAM171A1	1.05821	0.0339521
CAPN5	1.06337	0.00951864
S100A9	1.06552	0.0189123
GRINA	1.06682	0.0201454
RIPK3	1.06706	3.02e-06
RUSC1	1.0687	9.78e-06
PLIN3	1.07004	0.00287877
ITGA2B	1.07465	0.0150918
LOC122449901	1.07651	9.72e-07
C27H21orf62	1.07671	0.018826
LOC122427539	1.08026	0.00199438
LOC122431078	1.08115	1.13e-05
LOC122443894	1.08675	0.0212763
OGFR	1.08807	0.000171664
ARNT2	1.08863	0.00312719
FCER1G	1.08906	3.21e-05
EMC9	1.09071	0.000143723
SNAI3	1.09193	0.0423313
PHLDA1	1.09239	0.0357875
LY6E	1.09342	0.007934
TRIM21	1.09353	4.75e-11
SYT17	1.09714	0.0191492
LOC122429598	1.10093	0.0112135
RNF31	1.10439	1.63e-05
KHNYN	1.108	1.82e-07
LOC122422020	1.11243	0.00199438
SLC12A3	1.11826	0.0336178
GP1BB	1.12086	0.0278256
HMOX1	1.12125	1.16e-10
SDS	1.12177	7.75e-06
LOC122453111	1.12349	0.00891715
OPRD1	1.12679	0.0205302
FXYD1	1.13062	0.00225876
IL1RN	1.13308	9.68e-16
LOC122423935	1.13412	0.0162917
KCNIP3	1.13447	0.0271018
THEM6	1.13498	0.00906856
GMPR	1.13553	0.0204974
TAGLN	1.13646	0.00466447
RUSC2	1.13811	0.00574973
LOC122421255	1.1389	0.0453326
XCR1	1.14278	8e-06
ZNF628	1.14597	0.000283398
PRPSAP1	1.15045	7.82e-08
TST	1.15112	0.0205302
IFIT5	1.15259	0.0234509
EVI2B	1.15702	5.64e-06
LOC122439045	1.15812	0.0236136
RIPOR3	1.16481	0.00281232
CGAS	1.16636	0.0415638
SNAI1	1.16704	0.0374408
MCEMP1	1.16742	0.00118658
LAP3	1.16944	2.16e-06
LOC122426323	1.17022	0.00332061
SLC25A45	1.17769	0.0339006
LIMS2	1.17908	0.0192441
KCNK13	1.17988	0.00606318
GP9	1.18131	0.0423313
EIF2AK2	1.18181	0.00136056
OPTN	1.18525	1.12e-05
LOC122447636	1.19128	0.0263922
LOC122431086	1.19467	0.0203098
TMEM119	1.19904	5.57e-06
LOC122449458	1.20381	0.0121755
ALDH3A1	1.20987	0.000256294
CARMIL1	1.21374	0.0320656
PERM1	1.22038	0.0111165
LOC122432410	1.22145	0.0427856
IFIH1	1.22315	0.000126536
CIB3	1.22448	0.00456874
BID	1.2267	1.19e-07
RAB3B	1.22697	0.0236136
MEGF11	1.22724	0.00374448
CD274	1.22822	0.0101009
TUBB6	1.22903	0.0214701
ACVRL1	1.23037	2.4e-08
CC2D2A	1.23784	0.000265217
LOC122441818	1.24193	0.00244004
LOC122426664	1.2431	0.0102806
CCN2	1.24315	0.0388503
LIF	1.24573	0.022502
LOC122451518	1.25434	0.0389967
LY6G6C	1.26571	0.0427345
DEAF1	1.26848	4.4e-09
WDR35	1.26993	0.00141103
CDHR3	1.27081	0.0224978
C1QC	1.28511	0.00133788
RXFP4	1.29163	0.0211669
LTB4R	1.29217	1.37e-13
FOXS1	1.29305	0.00316193
LOC122425619	1.30068	0.000781755
AKAP12	1.30381	0.0318907
DRD1	1.30511	0.0228963
LOC122438722	1.30593	0.0246633
ACTG2	1.30865	0.00697731
GP5	1.31583	0.0209749
CDHR4	1.3165	0.0272464
LOC122432064	1.31999	0.000538947
LOC122423047	1.32195	0.0373118
LOC122449425	1.33181	1.6e-07
AIF1L	1.3356	0.0455274
FSTL4	1.34556	0.00299753
LOC122428361	1.34634	0.0203098
GPBAR1	1.36505	7.86e-05
LOC122430804	1.36776	7.57e-05
C1QB	1.36873	0.00306715
CAVIN3	1.36899	3.86e-05
LOC122429609	1.37322	0.0102806
DENND2A	1.37484	0.00577877
DTX3L	1.37524	9.1e-10
ADCY4	1.37563	2.15e-06
AQP9	1.37855	1.13e-05
BATF2	1.38952	3.23e-09
CMTR1	1.39161	1.32e-11
CEBPZOS	1.39364	2.26e-05
LOC122426418	1.39469	4.64e-12
C6H15orf48	1.39544	3.83e-07
IFI35	1.3972	1.89e-09
GNAZ	1.40153	0.0106127
AK8	1.404	0.000726191
LOC122436432	1.40402	0.00322845
LOC122439764	1.41072	0.0168084
C30H9orf43	1.41326	0.0336365
MYL9	1.4137	0.0135224
H1-5	1.43067	0.0251276
LOC122428295	1.43497	0.0375002
VWF	1.44007	0.0244568
SHFL	1.44225	8.92e-19
LOC122452775	1.44656	0.000388476
SNTA1	1.4501	0.00168403
C1QA	1.46187	0.00697957
LOC122449430	1.46281	0.000108493
TMEM140	1.47215	6.09e-05
LOC122430223	1.47259	9.27e-13
CREB3L3	1.47317	0.000523926
LOC122441720	1.4745	0.0417148
ADAR	1.48222	1.18e-14
IRF9	1.48768	8.1e-15
HSPB6	1.48966	0.0018139
MARCKSL1	1.4941	3.8e-06
CBLN3	1.52155	3.36e-06
PLEKHA4	1.52309	0.0128223
CMPK2	1.52317	0.000126941
SYCE1	1.52451	0.0016554
LOC122435899	1.52809	0.0179375
LOC122437409	1.5285	0.0205302
LOC122429986	1.52941	0.00287877
MARCO	1.54253	0.0435856
TNFAIP6	1.54561	2.31e-05
CCRL2	1.54562	9.2e-06
HSPA6	1.5572	0.00211282
LOC122451423	1.56039	0.0246403
PARP10	1.56805	1.24e-07
EPS8L2	1.56856	3.64e-10
SYNGR4	1.56924	0.0191723
LY6G6F	1.57345	0.00526935
CLDN4	1.57475	0.00393323
INKA1	1.58309	4.35e-06
LOC122438304	1.5863	0.0102459
GPR84	1.58631	1.63e-05
ZCCHC2	1.60275	3.03e-09
LOC122429635	1.60706	3.73e-08
LOC122425227	1.61002	0.0241718
LOC122448896	1.61104	0.00972732
LOC122437839	1.61206	1.99e-07
LOC122431989	1.61886	9.2e-06
PLXNB3	1.62124	0.00876328
LOC122447737	1.64974	0.0378917
APOBEC3A	1.65221	2.68e-07
STOML1	1.65783	2.13e-11
LOC122445354	1.66403	0.00236913
IFITM5	1.67356	1.22e-07
HLX	1.67501	1.02e-08
SOD3	1.69567	0.0246633
ART1	1.70072	3.79e-05
PARP12	1.70889	2.19e-15
ELN	1.71655	1.04e-05
LOC122425131	1.72048	0.00827233
PARP9	1.7265	1.37e-19
LOC122455130	1.7326	0.0493993
CA4	1.74794	0.00108033
ISG20	1.79026	1.05e-07
LOC122448780	1.80678	2.53e-16
IDO2	1.82989	0.00260382
LOC122421478	1.86725	4.66e-08
LOC122421520	1.87603	0.0176915
CXCL10	1.89818	9.96e-06
LOC122453333	1.91639	2.7e-10
TRNAG-UCC_70	1.92808	0.00606318
LOC122438172	1.92857	4.13e-08
LOC122429610	1.93037	1.73e-08
ADAMTS4	1.95246	0.0020569
TIMD4	1.96784	0.000358406
DDX58	2.0026	5.89e-10
LOC122431079	2.00713	1.3e-23
HERC6	2.01669	7.82e-08
UBA7	2.04819	1.96e-11
HES4	2.05283	7.82e-08
LGALS9	2.10741	4.47e-18
LOC122424337	2.1083	0.00910275
C1S	2.11156	0.0402137
HSH2D	2.11446	2.99e-14
LOC122431250	2.12647	6.73e-12
PODN	2.1333	0.00740684
IFI44L	2.13435	4.16e-06
LOC122442751	2.14762	0.0043584
HERC5	2.17823	1.37e-13
LOC122435416	2.19828	2.06e-07
LOC122429517	2.21793	0.000893572
LOC122420647	2.22448	0.000214961
LOC122452766	2.23233	1.42e-08
RSAD2	2.24722	1.16e-10
LOC122437901	2.25072	0.0191314
SPATS2L	2.29378	6.12e-09
SERINC2	2.29689	1.85e-15
LOC122419678	2.29979	1.15e-07
XAF1	2.30563	9.68e-16
ZNFX1	2.31462	1.15e-14
SERPING1	2.33402	0.00309571
C2	2.38269	0.000726191
TGM1	2.38615	1.62e-05
BCL2L14	2.39001	0.000205636
IFIT3	2.48594	5.21e-07
SMTNL1	2.54665	1.46e-13
ALOXE3	2.55395	2.28e-05
ADRB3	2.58794	0.0116038
SULT6B1	2.60166	1.92e-06
IFI44	2.60246	3.58e-07
UBE2L6	2.67035	2.56e-36
RNF213	2.67557	4.35e-22
PML	2.79878	1.16e-21
TRANK1	2.85879	5.18e-18
ZFYVE28	2.86295	5.41e-23
IFIT2	3.04871	1.64e-14
LOC122446860	3.06953	3.2e-06
LOC122446174	3.0947	4.59e-18
LOC122422848	3.12144	2.07e-10
LOC122423793	3.14132	6.12e-29
LOC122422854	3.30094	1.41e-13
IRF7	3.31222	1.09e-25
LOC122448350	3.37108	6.15e-08
TSKU	3.48468	1.43e-32
LOC122422833	3.63576	1.92e-25
AGRN	3.70701	3.96e-24
RTP4	3.73261	2.38e-14
EPSTI1	3.82535	3.39e-24
ZBP1	3.97846	1.45e-29
LOC122422844	3.98722	9.25e-34
MX2	4.15457	9.01e-22
LOC122451077	4.18014	0.0226071
LOC122445369	4.29528	3.08e-22
DHX58	4.38189	1.23e-37
MX1	4.47237	6.35e-71
ISG15	4.94135	1.14e-45
IFI6	4.99361	4.53e-67
SIGLEC1	5.70186	6.58e-35
